# Supplementary material for: Identification of TMEM206 proteins as pore of PAORAC/ASOR acid-sensitive chloride channels
Source: eLife. 2019 Jul 18;8:e49187. doi: 10.7554/eLife.49187 (PMC6663466; doi:10.7554/eLife.49187)
Supplement: Figure 1—source data 1. [file elife-49187-fig1-data1.xlsx]

## Sheet: Figure 1B
Data are absolute fluorescence values from individual 384-wells (in a.u.). For Fig. 1B, curves were normalized to the first value in each dataset (= 100%)
	Gluc pH5 FMRF																												NaI pH5 FMRF
Time	Well1	Well2	Well3	Well4	Well5	Well6	Well7	Well8	Well9	Well10	Well11	Well12	Well13	Well14	Well15	Well16	Well17	Well18	Well19	Well20	Well21	Well22	Well23	Well24	Well25	Well26	Well27	Well28	Well1	Well2	Well3	Well4	Well5	Well6	Well7	Well8	Well9	Well10	Well11	Well12	Well13	Well14	Well15	Well16	Well17	Well18	Well19	Well20	Well21
0	2678	2734	2870	2883	2878	2922	3253	2758	3000	2950	3142	2914	3153	2868	2699	2671	2835	2891	3028	2967	3095	2971	3026	3061	3022	2932	3055	2776	2549	2674	2858	2791	2919	3114	3074	3030	3095	3047	3197	2911	2997	3015	2592	2666	2769	2763	3063	2980	3218
1	2693	2728	2862	2870	2876	2921	3248	2785	3028	2968	3159	2922	3155	2883	2695	2680	2840	2888	3032	2955	3104	2973	3032	3044	3026	2937	3050	2786	2553	2684	2848	2792	2930	3110	3100	3034	3095	3050	3197	2899	3003	3009	2584	2671	2774	2765	3075	2989	3244
2	2663	2727	2871	2875	2891	2917	3245	2767	3011	2950	3160	2901	3136	2875	2695	2690	2847	2882	3040	2960	3112	2964	3049	3058	3022	2940	3061	2789	2560	2690	2856	2786	2914	3096	3098	3044	3094	3056	3184	2899	2989	3016	2596	2662	2770	2751	3049	2961	3246
3	2685	2719	2855	2872	2886	2917	3235	2761	3017	2959	3158	2908	3159	2874	2704	2675	2824	2892	3033	2965	3100	2971	3027	3050	3015	2935	3058	2785	2554	2680	2861	2791	2922	3105	3078	3040	3090	3057	3188	2895	3004	3033	2600	2657	2774	2770	3059	2958	3215
4	2671	2727	2856	2860	2890	2923	3234	2768	3005	2957	3145	2920	3150	2885	2703	2676	2831	2901	3036	2965	3092	2953	3033	3040	3024	2926	3042	2785	2562	2684	2831	2790	2916	3110	3080	3026	3094	3050	3194	2897	3008	3043	2587	2652	2769	2739	3061	2960	3207
5	2668	2730	2862	2870	2862	2900	3227	2743	2994	2941	3145	2910	3144	2869	2691	2680	2829	2870	3030	2957	3095	2946	3020	3047	3006	2918	3032	2763	2549	2674	2843	2781	2917	3088	3091	3012	3099	3044	3206	2885	2985	3015	2576	2634	2774	2762	3060	2966	3218
6	2657	2714	2853	2864	2879	2895	3226	2747	2984	2958	3143	2897	3166	2873	2682	2668	2832	2868	3019	2955	3099	2954	3026	3032	3010	2928	3038	2760	2549	2679	2833	2774	2912	3101	3073	3018	3080	3034	3178	2892	2984	3013	2603	2652	2760	2739	3049	2950	3212
7	2651	2707	2848	2869	2869	2895	3237	2742	2995	2942	3136	2894	3152	2869	2692	2663	2825	2863	3011	2926	3070	2954	3010	3041	2991	2915	3049	2771	2560	2665	2825	2767	2905	3083	3076	3003	3078	3036	3178	2879	2981	3006	2574	2632	2747	2746	3051	2949	3201
7.734	2667	2702	2842	2855	2873	2899	3227	2747	2994	2946	3130	2899	3141	2882	2677	2653	2823	2877	3017	2936	3067	2945	2995	3028	3003	2911	3034	2773	2547	2670	2820	2760	2900	3079	3075	3022	3078	3036	3179	2883	2987	3009	2579	2646	2759	2728	3060	2943	3215
8.734	2643	2707	2833	2854	2858	2882	3208	2743	2982	2927	3122	2885	3122	2842	2670	2658	2821	2853	2999	2935	3061	2940	3001	3020	2992	2903	3025	2759	2530	2658	2829	2771	2906	3067	3051	3017	3069	3027	3179	2881	2962	3000	2561	2641	2749	2733	3047	2944	3204
9.469	2653	2709	2843	2850	2863	2900	3218	2749	2967	2927	3121	2901	3120	2847	2690	2669	2799	2864	3004	2942	3068	2936	2993	3031	2990	2897	3012	2765	2553	2660	2817	2755	2892	3077	3057	3006	3068	3034	3169	2863	2967	3000	2577	2625	2743	2722	3042	2931	3197
10.469	2664	2709	2847	2850	2862	2894	3219	2737	3005	2923	3119	2891	3116	2866	2681	2663	2814	2875	3019	2943	3069	2937	3014	3020	2990	2901	3017	2745	2553	2663	2824	2767	2900	3074	3065	2993	3064	3018	3169	2871	2979	2977	2577	2642	2778	2739	3048	2960	3185
11.469	2651	2727	2848	2862	2880	2922	3237	2744	3009	2953	3114	2920	3121	2869	2681	2684	2831	2875	3028	2961	3087	2948	3030	3036	3000	2920	3024	2756	2554	2684	2838	2791	2916	3094	3093	3025	3087	3045	3191	2899	2990	3010	2574	2659	2769	2759	3064	2976	3227
12.469	2657	2715	2860	2888	2900	2915	3229	2773	3014	2943	3122	2908	3136	2868	2705	2685	2831	2873	3042	2961	3104	2973	3019	3033	3024	2908	3020	2763	2564	2691	2843	2797	2933	3103	3098	3027	3090	3045	3190	2894	2976	3002	2592	2654	2779	2752	3079	2973	3218
13.469	2738	2773	2898	2904	2927	2976	3275	2821	3053	3008	3175	2952	3228	2929	2748	2725	2880	2936	3063	3008	3156	3000	3091	3080	3059	2970	3092	2809	2647	2742	2898	2854	2976	3150	3117	3075	3154	3098	3228	2943	3062	3077	2642	2707	2809	2805	3116	3024	3268
14.469	3219	3366	3404	3411	3408	3452	3840	3318	3565	3546	3826	3407	3636	3397	3206	3382	3424	3457	3639	3630	3757	3665	3529	3580	3760	3625	3575	3613	3216	3376	3543	3296	3452	3683	3702	3617	3596	3555	3756	3450	3511	3624	3108	3326	3232	3413	3507	3591	3617
15.469	2959	3096	3189	3211	3231	3299	3546	3113	3336	3343	3459	3226	3533	3225	3029	3087	3202	3237	3375	3354	3477	3341	3415	3420	3481	3354	3419	3223	2936	3060	3231	3137	3206	3421	3387	3287	3343	3276	3486	3236	3338	3317	2882	2990	3074	3088	3305	3203	3400
16.469	2821	2925	3059	3072	3052	3135	3389	2987	3195	3149	3261	3064	3354	3037	2856	2877	3036	3066	3208	3156	3289	3160	3227	3191	3269	3146	3229	2986	2702	2796	3008	2925	3043	3231	3201	3099	3161	3068	3281	3037	3127	3117	2638	2768	2878	2890	3129	3001	3228
17.469	2775	2847	3030	3050	3010	3047	3313	2939	3109	3062	3163	2950	3233	2932	2824	2799	2948	3029	3152	3071	3238	3116	3085	3101	3150	3037	3121	2885	2570	2692	2880	2804	2950	3111	3105	3000	2999	2948	3169	2894	2979	2958	2550	2659	2781	2790	3022	2881	3110
18.469	2748	2809	2973	2987	2968	2986	3305	2918	3075	3031	3126	2939	3159	2889	2811	2783	2965	3001	3102	3051	3221	3068	3057	3077	3131	2998	3074	2834	2515	2628	2806	2750	2903	3010	3013	2913	2926	2872	3087	2786	2909	2881	2507	2578	2724	2713	2941	2817	3037
19.469	2649	2705	2862	2849	2844	2880	3164	2749	2977	2904	3022	2829	3057	2789	2669	2705	2805	2836	2960	2940	3070	2899	2946	2996	2963	2860	2951	2788	2330	2423	2618	2541	2699	2823	2828	2703	2771	2709	2901	2610	2723	2719	2341	2379	2558	2486	2766	2596	2863
20.469	2582	2656	2788	2780	2772	2795	3098	2688	2904	2821	2921	2784	2984	2741	2621	2593	2731	2790	2894	2857	3002	2833	2914	2880	2887	2782	2864	2676	2218	2304	2484	2426	2577	2677	2664	2584	2661	2585	2780	2505	2614	2627	2237	2235	2441	2360	2636	2459	2711
21.469	2544	2601	2744	2755	2743	2776	3068	2655	2867	2769	2887	2733	2968	2698	2578	2536	2694	2736	2835	2807	2942	2793	2845	2852	2856	2747	2850	2623	2121	2213	2372	2339	2479	2585	2562	2468	2556	2463	2659	2386	2506	2520	2142	2137	2332	2256	2533	2325	2611
22.469	2484	2563	2696	2711	2698	2723	2999	2591	2810	2727	2841	2699	2930	2669	2523	2491	2643	2691	2800	2770	2882	2742	2814	2816	2791	2695	2810	2589	1996	2084	2241	2214	2369	2473	2409	2344	2442	2361	2525	2275	2391	2412	2038	2038	2241	2136	2416	2208	2473
23.469	2456	2515	2667	2664	2657	2685	2948	2563	2779	2685	2795	2661	2887	2631	2488	2479	2611	2626	2753	2727	2840	2690	2761	2770	2755	2659	2759	2565	1926	1995	2143	2124	2267	2344	2308	2204	2325	2250	2409	2162	2281	2312	1954	1933	2134	2033	2294	2095	2353
24.469	2443	2497	2636	2626	2601	2651	2918	2542	2737	2656	2747	2631	2844	2591	2458	2429	2593	2614	2708	2688	2800	2642	2737	2714	2728	2603	2710	2519	1848	1896	2038	2029	2167	2223	2195	2109	2217	2136	2293	2049	2183	2215	1872	1843	2041	1940	2199	1987	2243
25.469	2408	2448	2595	2594	2562	2603	2858	2495	2701	2610	2710	2597	2815	2569	2436	2392	2552	2562	2674	2643	2759	2599	2682	2683	2670	2582	2684	2477	1755	1806	1942	1928	2070	2126	2084	2000	2119	2046	2166	1962	2100	2120	1790	1763	1947	1849	2095	1898	2138
26.469	2379	2430	2576	2556	2531	2571	2814	2465	2666	2553	2673	2559	2776	2527	2401	2372	2513	2523	2633	2614	2716	2562	2655	2624	2623	2555	2641	2442	1695	1727	1859	1854	1976	2028	1999	1906	2012	1927	2060	1876	2002	2029	1728	1695	1860	1760	1990	1808	2023
27.469	2333	2384	2524	2521	2503	2544	2772	2437	2624	2541	2626	2527	2724	2506	2353	2330	2456	2490	2586	2574	2677	2533	2596	2602	2584	2488	2599	2410	1619	1666	1775	1770	1894	1937	1905	1832	1916	1852	1972	1791	1914	1960	1667	1623	1781	1701	1903	1731	1959
28.469	2310	2348	2482	2492	2476	2494	2738	2395	2581	2503	2598	2478	2713	2470	2332	2295	2445	2451	2545	2521	2628	2473	2573	2561	2548	2458	2560	2365	1569	1586	1699	1702	1810	1852	1803	1744	1826	1775	1864	1709	1828	1880	1595	1561	1719	1636	1839	1657	1861
29.469	2279	2316	2448	2443	2424	2457	2695	2362	2561	2460	2538	2445	2669	2440	2304	2259	2394	2421	2489	2483	2591	2434	2531	2520	2504	2417	2523	2349	1521	1528	1625	1638	1729	1773	1734	1669	1752	1695	1787	1635	1745	1805	1535	1505	1656	1575	1772	1596	1798
30.469	2253	2277	2415	2414	2395	2427	2662	2323	2526	2423	2515	2408	2628	2399	2263	2237	2380	2382	2464	2450	2536	2401	2490	2479	2458	2371	2489	2300	1465	1482	1573	1576	1668	1706	1675	1617	1683	1616	1712	1571	1675	1736	1475	1452	1594	1535	1697	1551	1721
31.469	2221	2248	2374	2396	2347	2375	2609	2304	2480	2386	2473	2384	2576	2354	2235	2187	2325	2343	2430	2407	2496	2363	2455	2430	2429	2338	2452	2259	1415	1433	1518	1518	1601	1647	1604	1556	1622	1574	1661	1525	1616	1667	1430	1406	1534	1488	1648	1489	1664
32.469	2174	2228	2344	2341	2322	2342	2571	2275	2431	2354	2428	2352	2540	2321	2209	2161	2297	2307	2385	2364	2465	2328	2415	2406	2391	2314	2411	2242	1382	1397	1466	1481	1545	1596	1565	1516	1572	1520	1595	1469	1558	1630	1378	1364	1485	1445	1584	1455	1620
33.469	2170	2197	2307	2314	2278	2321	2540	2235	2399	2314	2407	2303	2534	2304	2180	2132	2275	2272	2347	2348	2436	2289	2371	2364	2345	2277	2378	2206	1346	1345	1429	1440	1494	1544	1526	1473	1516	1479	1548	1422	1509	1584	1345	1336	1443	1412	1543	1419	1570
34.469	2130	2168	2294	2278	2254	2293	2492	2211	2381	2264	2360	2279	2491	2256	2144	2109	2222	2248	2316	2292	2374	2247	2356	2316	2317	2246	2336	2171	1316	1331	1379	1398	1451	1495	1474	1432	1490	1444	1497	1391	1466	1545	1298	1304	1413	1366	1500	1377	1527
35.469	2091	2131	2258	2254	2218	2259	2455	2183	2335	2248	2332	2259	2442	2237	2130	2086	2180	2224	2284	2266	2336	2208	2301	2299	2285	2201	2315	2142	1279	1301	1350	1357	1413	1463	1436	1402	1435	1407	1469	1359	1417	1507	1274	1281	1362	1345	1466	1341	1483
36.469	2074	2095	2214	2219	2187	2228	2425	2144	2307	2201	2288	2209	2423	2198	2084	2055	2173	2185	2238	2229	2295	2179	2269	2258	2238	2171	2259	2135	1260	1265	1326	1334	1373	1433	1409	1378	1396	1371	1422	1321	1388	1474	1246	1244	1333	1302	1431	1318	1448
37.469	2049	2082	2194	2194	2153	2197	2402	2120	2272	2185	2289	2189	2380	2184	2063	2032	2146	2157	2204	2199	2273	2152	2237	2220	2197	2165	2238	2116	1238	1245	1287	1307	1340	1403	1370	1351	1367	1341	1399	1302	1354	1433	1224	1227	1299	1291	1389	1294	1417
38.469	2037	2044	2141	2153	2129	2153	2350	2096	2243	2163	2239	2159	2344	2136	2045	2019	2102	2122	2168	2166	2226	2129	2218	2203	2168	2128	2212	2066	1212	1221	1270	1288	1322	1363	1344	1327	1346	1324	1371	1267	1318	1409	1198	1195	1277	1265	1362	1265	1379
39.469	2002	2023	2125	2138	2099	2135	2322	2065	2221	2127	2204	2131	2326	2129	2016	1991	2078	2101	2131	2150	2202	2091	2182	2175	2144	2095	2170	2047	1188	1204	1251	1259	1296	1341	1321	1293	1321	1294	1343	1258	1306	1399	1174	1184	1257	1244	1339	1250	1357
40.469	1970	2003	2100	2113	2074	2111	2292	2038	2182	2111	2182	2113	2294	2089	1994	1960	2048	2076	2123	2114	2176	2077	2152	2143	2110	2063	2142	2023	1170	1180	1217	1240	1273	1315	1300	1284	1294	1269	1314	1227	1270	1370	1155	1158	1233	1234	1307	1222	1327
41.469	1963	1981	2080	2080	2048	2072	2261	2034	2143	2068	2149	2090	2273	2091	1976	1941	2027	2044	2074	2105	2148	2061	2122	2115	2096	2042	2112	2008	1160	1165	1210	1225	1260	1296	1277	1264	1284	1254	1297	1222	1260	1359	1158	1159	1217	1220	1305	1205	1321
42.469	1948	1958	2057	2065	2019	2064	2244	2004	2123	2062	2122	2054	2238	2050	1941	1907	2004	2025	2053	2078	2120	2027	2104	2092	2045	2022	2099	1983	1135	1139	1186	1211	1227	1278	1258	1262	1254	1232	1271	1196	1231	1318	1130	1136	1207	1207	1277	1181	1287
43.469	1914	1928	2019	2030	1992	2035	2194	1982	2105	2034	2103	2034	2214	2031	1933	1901	1989	2009	2026	2049	2096	2008	2073	2056	2039	2013	2077	1960	1122	1129	1171	1185	1213	1257	1250	1234	1243	1219	1257	1188	1216	1319	1112	1121	1177	1182	1253	1179	1266
44.469	1902	1922	2011	2017	1983	2010	2190	1970	2084	2012	2070	2014	2188	1999	1907	1881	1971	1979	2016	2026	2078	1992	2055	2032	2010	1978	2057	1936	1111	1111	1156	1181	1199	1238	1227	1223	1223	1204	1237	1168	1198	1296	1100	1111	1158	1177	1246	1161	1264
45.469	1885	1897	1986	1992	1959	1977	2166	1947	2065	1977	2059	1988	2125	1977	1889	1865	1937	1955	1993	1995	2047	1957	2019	2022	1995	1952	2023	1912	1104	1116	1132	1158	1191	1225	1213	1209	1214	1189	1213	1144	1187	1280	1080	1086	1158	1172	1221	1145	1233
46.469	1864	1874	1959	1978	1937	1958	2136	1929	2022	1963	2029	1959	2126	1947	1872	1841	1921	1934	1958	1981	2015	1942	1996	2013	1965	1918	1994	1883	1096	1104	1125	1148	1171	1201	1207	1201	1194	1180	1199	1132	1167	1269	1083	1089	1139	1153	1207	1127	1233
47.469	1836	1868	1949	1962	1906	1946	2111	1901	2019	1942	2009	1946	2097	1943	1840	1825	1906	1918	1942	1951	1999	1927	1976	1973	1930	1917	1984	1886	1070	1090	1121	1132	1158	1183	1188	1187	1181	1170	1186	1121	1169	1253	1057	1069	1129	1146	1209	1124	1207
48.469	1829	1852	1938	1929	1892	1910	2083	1887	1993	1921	2005	1935	2090	1905	1854	1814	1882	1906	1912	1932	1967	1907	1965	1958	1922	1897	1955	1853	1071	1078	1114	1117	1145	1182	1182	1174	1172	1156	1181	1116	1153	1239	1063	1063	1112	1149	1184	1108	1196
49.469	1814	1832	1925	1919	1876	1898	2062	1866	1975	1902	1956	1904	2054	1901	1823	1786	1852	1881	1902	1916	1958	1874	1942	1931	1902	1873	1939	1851	1066	1054	1093	1106	1127	1166	1159	1162	1158	1138	1165	1111	1130	1236	1047	1051	1110	1139	1174	1099	1191
50.469	1811	1812	1895	1898	1846	1882	2048	1855	1938	1894	1942	1895	2046	1892	1798	1789	1838	1859	1879	1908	1946	1867	1933	1931	1877	1854	1914	1823	1054	1058	1085	1110	1121	1161	1159	1156	1150	1125	1149	1093	1116	1214	1031	1052	1101	1112	1166	1090	1178
51.469	1804	1804	1869	1883	1827	1856	2022	1836	1935	1857	1933	1889	2016	1872	1788	1776	1824	1836	1874	1888	1923	1860	1913	1898	1860	1847	1906	1821	1045	1057	1083	1100	1113	1148	1140	1152	1143	1133	1139	1094	1118	1201	1031	1044	1097	1109	1158	1093	1173
52.469	1781	1781	1873	1863	1822	1856	2003	1820	1914	1846	1920	1877	2006	1866	1771	1764	1813	1828	1859	1876	1905	1849	1898	1885	1858	1823	1889	1805	1045	1039	1062	1094	1108	1134	1144	1141	1139	1116	1144	1087	1105	1196	1025	1047	1082	1112	1149	1088	1177
53.469	1765	1762	1850	1855	1811	1833	2009	1811	1900	1829	1895	1849	1991	1842	1767	1736	1795	1819	1846	1853	1879	1827	1891	1875	1827	1807	1865	1790	1028	1036	1067	1084	1104	1139	1127	1130	1126	1112	1133	1078	1095	1193	1014	1039	1085	1110	1144	1079	1151
54.469	1755	1765	1842	1841	1790	1821	1972	1791	1883	1834	1874	1820	1983	1825	1746	1716	1787	1792	1813	1844	1869	1817	1866	1871	1812	1798	1855	1766	1023	1040	1051	1082	1089	1122	1122	1123	1120	1102	1121	1061	1081	1173	1021	1033	1060	1090	1137	1071	1145
55.469	1751	1746	1822	1835	1785	1805	1963	1778	1872	1796	1867	1820	1956	1811	1740	1721	1778	1794	1805	1832	1853	1810	1850	1854	1799	1781	1841	1753	1033	1020	1057	1070	1084	1114	1124	1119	1111	1102	1115	1059	1079	1175	1005	1027	1060	1083	1126	1058	1140
56.469	1724	1746	1805	1826	1761	1799	1952	1757	1849	1805	1849	1800	1933	1794	1721	1711	1758	1785	1803	1819	1840	1791	1845	1834	1787	1780	1815	1740	1026	1024	1051	1065	1084	1108	1115	1112	1107	1094	1105	1063	1070	1177	1008	1011	1049	1081	1113	1060	1138
57.203	1716	1725	1796	1790	1750	1780	1924	1757	1855	1787	1840	1790	1931	1791	1720	1699	1745	1771	1791	1817	1840	1795	1822	1830	1777	1777	1816	1747	1005	1006	1043	1065	1076	1108	1112	1108	1103	1081	1095	1050	1062	1176	999	1019	1060	1087	1108	1051	1126
58.203	1718	1719	1787	1806	1743	1774	1922	1742	1839	1774	1820	1782	1924	1785	1723	1696	1741	1759	1784	1801	1832	1768	1815	1817	1773	1756	1802	1737	1005	1020	1039	1062	1075	1101	1104	1108	1091	1076	1097	1047	1060	1161	1000	1016	1048	1085	1112	1054	1126
58.937	1709	1712	1786	1796	1731	1769	1908	1733	1833	1764	1811	1782	1906	1781	1686	1680	1730	1751	1762	1797	1811	1757	1795	1808	1776	1745	1793	1722	1016	996	1032	1057	1059	1096	1096	1091	1096	1082	1096	1041	1060	1162	994	1017	1047	1063	1105	1047	1123
59.937	1707	1694	1760	1778	1722	1756	1900	1734	1801	1753	1803	1771	1889	1769	1678	1668	1715	1745	1755	1781	1810	1755	1798	1789	1739	1741	1777	1720	1004	1009	1024	1053	1053	1088	1084	1098	1083	1069	1085	1042	1053	1162	984	1006	1046	1077	1103	1047	1127
60.937	1696	1689	1760	1773	1708	1739	1878	1721	1810	1743	1795	1758	1876	1748	1677	1655	1711	1735	1756	1776	1789	1753	1790	1779	1731	1719	1769	1710	1005	1002	1036	1055	1055	1081	1092	1104	1081	1072	1080	1033	1043	1156	984	1008	1045	1070	1101	1042	1110
61.937	1674	1683	1741	1772	1689	1729	1870	1712	1795	1726	1789	1741	1859	1752	1672	1647	1698	1730	1732	1758	1771	1733	1756	1764	1723	1711	1762	1685	991	1004	1017	1036	1055	1081	1083	1090	1072	1058	1065	1039	1035	1141	983	1006	1035	1068	1097	1041	1104
62.937	1664	1671	1737	1755	1692	1722	1856	1697	1782	1720	1776	1740	1854	1729	1665	1649	1692	1712	1724	1738	1770	1735	1764	1770	1708	1705	1748	1678	987	989	1025	1038	1046	1074	1087	1077	1067	1050	1069	1033	1039	1146	977	995	1032	1069	1081	1022	1100
63.937	1655	1657	1730	1746	1687	1698	1840	1695	1767	1698	1760	1718	1835	1726	1660	1639	1681	1700	1724	1731	1758	1726	1749	1762	1702	1683	1732	1671	995	996	1019	1038	1045	1079	1085	1083	1067	1058	1064	1029	1033	1137	970	992	1046	1061	1095	1026	1081
64.937	1646	1661	1714	1727	1677	1693	1842	1679	1767	1701	1744	1717	1822	1708	1658	1624	1668	1699	1723	1730	1745	1706	1745	1735	1687	1686	1723	1657	993	985	1018	1030	1037	1063	1062	1069	1061	1044	1059	1019	1035	1131	971	986	1026	1063	1091	1028	1097
65.937	1651	1650	1710	1732	1669	1688	1837	1672	1751	1682	1748	1698	1822	1697	1639	1621	1672	1691	1701	1719	1747	1706	1740	1733	1686	1675	1715	1670	980	974	999	1027	1037	1061	1065	1068	1056	1040	1064	1022	1035	1126	961	1003	1028	1063	1082	1025	1092
66.937	1636	1637	1710	1716	1665	1683	1818	1669	1735	1695	1719	1698	1818	1700	1624	1622	1653	1684	1694	1716	1740	1697	1730	1718	1669	1666	1716	1658	984	985	995	1035	1031	1069	1064	1073	1054	1044	1050	1016	1016	1129	960	982	1022	1059	1071	1018	1091
67.937	1643	1639	1702	1717	1646	1672	1811	1651	1733	1687	1731	1684	1794	1682	1621	1612	1634	1668	1687	1708	1736	1688	1722	1714	1677	1668	1695	1633	973	979	995	1027	1027	1059	1070	1073	1043	1043	1053	1010	1020	1121	954	980	1022	1063	1080	1019	1086
68.937	1626	1632	1694	1704	1642	1666	1807	1643	1726	1662	1704	1671	1795	1674	1604	1598	1631	1664	1676	1689	1720	1689	1703	1702	1664	1641	1703	1628	977	971	991	1013	1010	1048	1049	1066	1041	1036	1050	1001	1015	1119	944	977	1011	1046	1067	1015	1088
69.937	1634	1624	1692	1690	1641	1664	1801	1651	1725	1653	1711	1678	1790	1670	1604	1585	1633	1664	1666	1686	1704	1680	1700	1714	1647	1639	1690	1618	971	967	994	1013	1029	1049	1054	1064	1045	1037	1039	999	1016	1108	958	976	1024	1041	1071	1014	1075
70.937	1615	1610	1678	1683	1624	1652	1786	1625	1719	1658	1708	1664	1775	1674	1597	1576	1627	1651	1665	1683	1690	1670	1711	1687	1640	1631	1682	1625	965	976	992	1009	1025	1045	1052	1057	1040	1033	1032	999	1005	1112	950	983	1016	1056	1065	1014	1084
71.937	1622	1602	1657	1687	1631	1643	1776	1625	1702	1642	1694	1658	1766	1669	1589	1578	1625	1649	1655	1679	1696	1670	1698	1696	1637	1634	1673	1615	962	978	989	1010	1024	1038	1046	1061	1030	1035	1040	992	1006	1105	959	981	1005	1045	1071	1013	1074
72.937	1612	1602	1664	1673	1613	1636	1768	1627	1704	1639	1692	1657	1757	1648	1593	1568	1615	1630	1657	1674	1691	1659	1683	1680	1622	1631	1664	1602	958	970	991	1012	1010	1045	1038	1060	1037	1029	1031	999	998	1110	952	973	1008	1040	1050	1024	1074
73.937	1593	1606	1670	1674	1611	1629	1760	1622	1695	1633	1675	1653	1759	1646	1574	1577	1627	1638	1650	1668	1680	1642	1686	1684	1639	1623	1658	1605	962	970	982	1012	1013	1041	1050	1051	1038	1025	1031	990	1006	1109	944	972	1004	1047	1055	1007	1071
74.937	1588	1589	1648	1677	1613	1627	1750	1618	1706	1623	1678	1636	1752	1632	1569	1567	1599	1628	1640	1657	1682	1646	1679	1673	1614	1604	1644	1593	949	966	985	997	1012	1028	1036	1051	1035	1024	1026	990	999	1096	937	977	1012	1047	1064	1013	1073
75.937	1591	1589	1648	1649	1585	1615	1741	1601	1685	1613	1665	1622	1733	1644	1563	1560	1592	1619	1640	1647	1666	1640	1658	1653	1607	1603	1640	1595	954	953	982	995	1003	1025	1041	1044	1032	1010	1026	988	995	1094	947	964	994	1037	1047	1000	1059
76.937	1584	1590	1633	1650	1593	1607	1744	1610	1677	1605	1658	1616	1725	1624	1568	1561	1582	1625	1623	1647	1656	1640	1659	1665	1602	1595	1645	1581	949	952	966	1000	1008	1028	1037	1047	1032	1025	1023	990	984	1095	942	964	997	1038	1049	1005	1060
77.937	1563	1577	1629	1651	1587	1601	1741	1601	1674	1599	1654	1610	1727	1630	1558	1539	1589	1594	1624	1640	1666	1639	1638	1647	1602	1586	1632	1577	945	961	973	996	1002	1023	1028	1040	1023	1011	1025	980	996	1089	938	964	997	1045	1051	993	1063
78.937	1574	1569	1625	1648	1582	1590	1736	1589	1666	1602	1656	1619	1729	1623	1555	1544	1583	1604	1620	1625	1654	1636	1649	1644	1595	1596	1620	1567	946	957	966	992	1000	1042	1034	1047	1020	1015	1006	982	999	1091	938	970	983	1034	1055	993	1055
79.937	1580	1571	1619	1641	1569	1594	1728	1589	1659	1589	1649	1618	1711	1616	1552	1541	1571	1596	1603	1631	1641	1631	1646	1646	1588	1584	1611	1571	956	944	971	988	991	1021	1032	1035	1021	1011	1017	979	993	1086	942	960	989	1027	1052	993	1051
80.937	1565	1566	1624	1638	1563	1594	1712	1577	1644	1594	1643	1610	1709	1598	1534	1526	1571	1601	1606	1635	1639	1612	1643	1631	1578	1583	1601	1567	960	951	976	991	992	1010	1030	1036	1016	1006	1010	980	997	1089	931	956	990	1030	1050	986	1051
81.937	1552	1549	1610	1628	1575	1589	1710	1582	1654	1592	1633	1594	1702	1602	1543	1526	1563	1592	1604	1620	1636	1618	1642	1635	1585	1568	1605	1559	955	944	962	996	992	1019	1029	1039	1023	1008	1011	980	986	1081	930	964	991	1023	1056	1000	1055
82.937	1565	1553	1604	1624	1564	1583	1712	1561	1643	1578	1620	1590	1704	1597	1529	1513	1553	1587	1596	1609	1632	1612	1630	1627	1574	1569	1600	1556	945	948	971	976	985	1015	1014	1035	1020	1017	1007	963	974	1084	924	953	989	1022	1036	993	1048
83.937	1542	1550	1598	1623	1545	1581	1704	1570	1643	1572	1621	1588	1696	1581	1521	1529	1545	1578	1582	1614	1622	1601	1633	1622	1563	1565	1594	1543	941	943	960	989	989	1012	1021	1037	1008	1003	1006	977	977	1083	923	958	989	1018	1039	983	1050
84.937	1539	1546	1610	1625	1552	1563	1699	1568	1627	1577	1631	1592	1696	1598	1525	1516	1550	1581	1580	1600	1629	1603	1616	1614	1565	1558	1583	1544	945	951	952	983	989	1016	1016	1032	1014	1004	1003	974	976	1072	925	956	989	1034	1038	988	1046
85.937	1549	1536	1601	1610	1556	1566	1685	1551	1627	1566	1609	1588	1677	1581	1521	1505	1538	1567	1576	1585	1608	1598	1613	1606	1557	1547	1586	1551	927	944	960	989	983	1004	1020	1027	1010	993	1006	966	977	1069	930	947	981	1023	1044	987	1039
86.937	1534	1536	1593	1610	1552	1565	1680	1560	1621	1564	1600	1592	1681	1590	1522	1506	1544	1564	1568	1592	1608	1597	1610	1609	1554	1545	1578	1533	928	943	953	976	984	1011	1024	1026	1001	998	1003	962	973	1068	928	957	986	1020	1036	983	1053
87.937	1524	1520	1583	1609	1528	1563	1680	1543	1620	1553	1609	1567	1663	1580	1517	1509	1540	1562	1565	1598	1597	1603	1605	1601	1543	1542	1591	1516	932	936	948	989	978	1000	1010	1018	1008	991	994	967	968	1077	914	949	980	1021	1036	978	1039
88.937	1534	1528	1586	1611	1547	1545	1684	1549	1617	1553	1599	1567	1670	1556	1506	1508	1533	1561	1559	1589	1605	1590	1610	1600	1541	1539	1570	1522	937	932	953	980	976	1005	1001	1024	1008	988	998	964	980	1071	917	950	986	1027	1037	985	1042
89.937	1535	1524	1579	1596	1539	1554	1659	1548	1621	1547	1595	1566	1674	1577	1512	1498	1539	1570	1560	1586	1604	1590	1604	1597	1547	1528	1561	1528	932	940	957	987	982	1003	1008	1024	1002	998	1001	965	980	1069	914	956	983	1009	1025	981	1035
90.937	1527	1525	1571	1602	1540	1539	1653	1535	1606	1548	1598	1564	1664	1556	1495	1485	1528	1553	1564	1578	1592	1584	1593	1578	1529	1531	1574	1516	928	940	960	966	973	1004	1003	1020	996	989	994	961	963	1055	914	939	973	1013	1022	972	1032
91.937	1518	1527	1556	1597	1531	1547	1672	1544	1598	1543	1577	1555	1659	1553	1496	1489	1521	1552	1554	1577	1584	1572	1596	1591	1531	1527	1555	1527	923	937	948	978	978	1015	1015	1019	997	987	997	959	964	1064	920	943	977	1016	1028	970	1040
92.937	1510	1515	1567	1581	1525	1537	1648	1527	1603	1537	1589	1553	1651	1556	1490	1490	1522	1553	1545	1585	1593	1578	1586	1577	1540	1524	1545	1507	932	931	940	977	965	996	1003	1017	997	985	995	956	968	1064	917	945	973	1004	1030	968	1033
93.937	1523	1523	1574	1591	1526	1536	1654	1532	1604	1527	1590	1549	1658	1549	1483	1485	1522	1548	1559	1573	1597	1569	1585	1583	1531	1513	1549	1509	929	925	944	972	981	998	1004	1005	992	986	987	959	952	1059	909	941	974	1019	1026	980	1035
94.937	1504	1504	1563	1573	1515	1535	1643	1520	1602	1535	1574	1546	1646	1553	1486	1483	1504	1541	1541	1559	1572	1573	1585	1583	1531	1522	1549	1508	928	932	936	965	971	991	1017	1018	998	971	982	950	962	1063	907	936	974	1016	1022	975	1024
95.937	1502	1492	1553	1572	1511	1534	1645	1526	1593	1535	1567	1545	1642	1541	1487	1475	1506	1535	1544	1558	1576	1562	1571	1569	1521	1515	1546	1503	923	926	949	965	966	1002	1010	1008	997	989	989	958	960	1062	904	932	968	1018	1028	970	1030
96.937	1510	1507	1553	1566	1514	1525	1646	1524	1588	1516	1572	1527	1656	1543	1482	1484	1509	1535	1543	1564	1570	1562	1583	1559	1525	1518	1540	1494	929	934	931	965	976	996	999	1011	995	977	980	955	959	1056	906	938	969	1002	1028	975	1028
97.937	1496	1511	1548	1571	1514	1528	1641	1519	1581	1537	1572	1549	1644	1545	1480	1468	1499	1536	1533	1565	1582	1564	1570	1568	1513	1508	1532	1493	921	923	938	965	964	993	996	1011	991	982	987	953	954	1059	906	946	974	1007	1026	971	1026
98.937	1502	1508	1541	1566	1503	1522	1641	1515	1578	1516	1574	1531	1623	1538	1476	1489	1508	1524	1534	1556	1573	1555	1568	1565	1510	1496	1534	1499	935	919	941	967	972	991	1001	1004	994	981	985	950	952	1060	904	939	967	1010	1034	976	1023
99.937	1500	1498	1558	1565	1503	1515	1634	1513	1581	1525	1557	1525	1632	1530	1468	1464	1496	1525	1523	1549	1559	1553	1570	1564	1511	1508	1526	1487	919	931	949	961	965	984	1000	1001	994	981	986	962	961	1059	905	937	966	1002	1025	963	1035
100.937	1493	1495	1562	1572	1505	1518	1634	1513	1592	1515	1560	1525	1646	1532	1465	1449	1497	1525	1524	1549	1583	1546	1571	1557	1510	1499	1524	1483	916	923	941	965	960	993	1002	1005	989	981	977	944	953	1069	908	938	968	1009	1019	974	1025
101.937	1503	1500	1541	1560	1496	1523	1630	1521	1578	1509	1555	1531	1619	1517	1470	1460	1493	1517	1522	1542	1565	1551	1567	1562	1511	1489	1530	1482	916	920	939	954	969	983	1007	1006	983	974	983	948	961	1054	907	927	964	996	1021	967	1026
102.937	1492	1490	1553	1567	1503	1521	1616	1506	1583	1512	1564	1530	1617	1516	1460	1459	1494	1512	1531	1544	1563	1547	1566	1552	1510	1492	1534	1491	916	922	938	952	963	992	996	1006	983	976	970	948	948	1062	897	940	968	1000	1015	970	1027
103.937	1492	1490	1544	1556	1490	1516	1629	1503	1575	1502	1555	1513	1625	1517	1457	1462	1491	1527	1527	1545	1566	1543	1557	1557	1506	1493	1522	1474	918	923	941	960	957	982	992	1006	992	977	980	947	951	1061	911	930	967	1007	1022	968	1023
104.937	1488	1490	1539	1555	1497	1502	1626	1505	1557	1509	1556	1515	1622	1524	1468	1462	1482	1515	1518	1541	1570	1547	1551	1547	1486	1486	1517	1486	908	921	941	959	970	982	1002	1007	985	971	987	949	955	1040	894	925	953	1003	1016	971	1025
105.937	1479	1490	1535	1552	1489	1511	1618	1495	1572	1507	1546	1522	1622	1516	1454	1457	1482	1505	1511	1539	1558	1540	1550	1549	1505	1486	1509	1466	932	920	931	950	957	990	996	999	982	973	972	939	961	1056	907	936	962	1002	1009	966	1019
106.937	1488	1494	1527	1539	1495	1507	1623	1505	1554	1503	1550	1517	1608	1517	1450	1443	1471	1512	1521	1541	1560	1544	1557	1538	1494	1477	1514	1476	911	921	934	952	959	989	991	1004	992	972	974	938	941	1047	897	933	965	1001	1012	959	1016
107.937	1476	1475	1518	1550	1480	1496	1605	1501	1565	1490	1538	1522	1604	1517	1452	1451	1476	1515	1515	1537	1546	1527	1550	1537	1495	1479	1502	1468	910	925	927	957	956	970	997	1002	977	966	982	937	945	1053	898	927	956	995	1009	961	1013
108.937	1468	1466	1523	1539	1491	1480	1603	1500	1556	1499	1541	1504	1609	1507	1452	1439	1471	1499	1516	1523	1544	1541	1543	1540	1497	1477	1504	1461	911	908	935	957	959	978	995	1006	975	971	974	949	961	1050	899	928	951	998	1007	963	1025
109.937	1474	1462	1518	1541	1493	1493	1609	1482	1556	1509	1530	1513	1605	1520	1447	1439	1479	1507	1512	1531	1550	1533	1548	1534	1481	1473	1507	1467	910	916	931	954	961	983	991	996	972	960	965	949	938	1038	891	926	947	1003	1011	954	1020
110.937	1485	1475	1520	1546	1480	1494	1608	1492	1568	1496	1535	1497	1609	1515	1454	1442	1479	1500	1505	1515	1539	1535	1551	1519	1483	1469	1503	1457	913	919	936	954	950	975	983	1007	977	964	964	936	946	1055	892	924	954	999	1002	962	1017
111.937	1468	1474	1511	1539	1473	1489	1608	1490	1546	1496	1527	1501	1602	1500	1444	1444	1462	1490	1494	1513	1547	1526	1542	1527	1481	1469	1495	1466	916	909	930	946	945	975	984	1002	969	961	972	943	944	1031	891	920	953	998	1003	947	1016
112.937	1451	1470	1518	1531	1479	1477	1597	1484	1561	1484	1527	1498	1593	1490	1446	1444	1465	1490	1498	1519	1544	1530	1537	1530	1483	1456	1498	1462	907	919	918	963	954	978	985	994	973	958	968	934	939	1045	891	921	951	989	1022	952	999
113.937	1464	1454	1504	1526	1465	1488	1601	1476	1546	1485	1530	1499	1602	1489	1434	1413	1455	1498	1483	1517	1534	1526	1540	1524	1473	1467	1502	1449	912	909	925	954	956	971	985	997	966	954	968	939	931	1036	900	927	946	998	1013	954	1006
114.937	1460	1458	1516	1524	1469	1478	1590	1489	1549	1490	1515	1490	1591	1496	1435	1424	1457	1480	1505	1505	1533	1523	1552	1523	1466	1476	1497	1453	902	904	931	955	952	974	984	992	969	964	967	931	936	1034	884	926	953	993	1012	953	1013
115.937	1460	1463	1513	1523	1463	1480	1592	1482	1548	1485	1518	1488	1585	1493	1444	1437	1453	1486	1498	1509	1539	1520	1533	1517	1477	1467	1498	1453	895	908	921	946	949	978	985	984	973	969	963	934	940	1038	892	921	948	998	1006	953	1012
116.937	1468	1465	1508	1526	1478	1486	1589	1470	1535	1473	1520	1496	1585	1498	1439	1420	1461	1479	1492	1509	1534	1525	1536	1522	1466	1451	1490	1448	910	910	921	952	961	972	986	993	959	958	976	944	948	1037	888	909	948	994	1006	949	1001
117.937	1451	1463	1512	1523	1471	1486	1582	1483	1540	1480	1524	1503	1585	1479	1434	1442	1449	1489	1490	1512	1516	1519	1526	1516	1458	1460	1485	1441	899	910	926	951	950	966	978	994	975	970	973	933	943	1035	888	920	948	981	1005	952	1009
118.937	1451	1444	1507	1533	1462	1471	1591	1476	1540	1475	1514	1493	1581	1486	1429	1429	1451	1485	1484	1510	1527	1528	1536	1515	1465	1451	1474	1456	902	905	924	945	948	972	989	997	971	961	971	933	931	1030	885	905	954	992	1005	951	1002
119.937	1462	1457	1492	1521	1451	1480	1595	1476	1546	1473	1520	1469	1579	1496	1421	1412	1450	1491	1485	1501	1524	1527	1534	1515	1466	1459	1476	1443	911	913	917	950	939	963	982	991	962	962	960	935	940	1044	884	912	956	989	998	946	998
120.937	1454	1441	1499	1522	1451	1475	1573	1472	1537	1476	1518	1479	1580	1493	1424	1413	1456	1478	1490	1491	1528	1513	1529	1517	1468	1445	1484	1447	905	900	926	951	946	965	978	987	970	967	965	928	933	1044	885	915	945	993	1006	947	1002
121.937	1444	1453	1496	1523	1461	1474	1588	1471	1530	1470	1511	1485	1577	1478	1428	1433	1451	1469	1477	1505	1517	1517	1519	1511	1467	1447	1476	1437	911	899	924	954	949	967	972	985	969	962	973	935	928	1038	888	915	945	992	1003	945	1004
122.937	1446	1452	1490	1517	1450	1469	1580	1466	1535	1456	1522	1478	1567	1482	1426	1422	1439	1469	1490	1500	1508	1523	1529	1510	1457	1444	1482	1442	901	894	924	951	950	971	987	986	963	967	952	938	936	1043	878	922	945	991	1003	953	1000
123.937	1453	1442	1492	1517	1463	1465	1563	1472	1538	1464	1508	1475	1580	1483	1420	1411	1439	1476	1484	1510	1516	1516	1512	1507	1449	1444	1467	1432	904	905	917	943	957	965	977	999	969	962	963	932	941	1033	885	914	948	988	1007	947	998
124.937	1450	1448	1494	1511	1454	1463	1583	1466	1519	1462	1501	1468	1572	1466	1425	1415	1445	1472	1479	1495	1510	1500	1515	1510	1465	1451	1468	1429	900	908	917	945	949	966	968	981	971	962	961	936	929	1034	885	917	951	986	998	950	993
125.937	1433	1445	1498	1508	1454	1466	1563	1460	1527	1458	1506	1476	1567	1474	1422	1423	1443	1462	1481	1491	1522	1500	1529	1501	1460	1447	1477	1429	904	909	910	943	939	967	971	980	965	958	965	935	936	1039	884	915	942	990	999	949	1010
126.937	1444	1448	1486	1511	1455	1454	1572	1462	1524	1451	1490	1474	1565	1470	1421	1408	1445	1477	1476	1498	1518	1503	1505	1501	1462	1440	1462	1437	905	901	915	953	938	967	974	980	961	956	961	928	936	1033	886	911	945	986	1007	952	1004
127.937	1446	1453	1486	1513	1456	1460	1572	1452	1535	1455	1509	1461	1574	1469	1417	1422	1443	1469	1478	1493	1513	1505	1515	1501	1456	1432	1462	1427	904	903	917	943	942	957	973	976	963	948	960	926	924	1030	884	918	947	990	1002	946	1010
128.937	1436	1449	1482	1507	1463	1454	1561	1465	1519	1447	1500	1478	1560	1465	1426	1416	1441	1463	1475	1494	1514	1510	1514	1493	1453	1429	1453	1427	893	904	924	937	945	968	978	978	956	960	957	930	928	1029	883	908	946	989	1004	947	1002
129.937	1443	1435	1491	1498	1443	1460	1565	1458	1522	1470	1497	1453	1557	1470	1411	1407	1439	1465	1484	1483	1510	1502	1519	1497	1451	1425	1449	1431	895	905	923	937	951	964	974	979	958	953	963	927	932	1029	885	911	941	975	994	949	995
130.937	1436	1435	1492	1511	1438	1459	1569	1462	1524	1452	1498	1473	1552	1465	1415	1405	1435	1462	1470	1491	1505	1500	1509	1492	1442	1435	1472	1424	897	901	924	944	941	967	973	990	958	950	955	934	933	1029	874	905	952	986	998	944	1001
131.937	1427	1437	1474	1500	1449	1443	1564	1456	1526	1457	1495	1453	1551	1455	1408	1411	1439	1469	1467	1490	1513	1496	1517	1499	1442	1437	1448	1424	894	894	914	938	938	965	973	985	956	956	957	934	921	1038	876	911	948	978	992	947	1001
132.937	1430	1441	1482	1512	1443	1460	1552	1442	1513	1449	1478	1479	1554	1474	1413	1401	1433	1461	1456	1478	1499	1496	1490	1499	1438	1426	1448	1431	897	900	920	932	943	952	974	972	962	957	949	928	927	1017	880	914	945	980	989	944	989
133.937	1427	1429	1482	1492	1433	1447	1554	1453	1518	1451	1482	1455	1557	1460	1407	1393	1432	1462	1474	1476	1495	1494	1497	1484	1435	1423	1453	1431	891	899	916	934	941	962	971	972	960	943	953	916	929	1033	869	911	931	978	996	945	998
134.937	1439	1445	1478	1493	1448	1451	1557	1465	1519	1441	1487	1459	1553	1452	1402	1397	1410	1465	1453	1479	1502	1492	1507	1486	1434	1425	1449	1417	891	892	913	947	942	966	971	979	952	948	953	933	934	1022	883	906	937	987	993	956	1002
135.937	1433	1425	1469	1499	1438	1446	1552	1447	1507	1450	1482	1456	1570	1457	1407	1390	1423	1448	1459	1479	1503	1488	1506	1482	1446	1426	1439	1426	895	894	917	935	937	963	968	980	968	949	945	929	923	1028	882	914	940	976	993	945	995
136.937	1427	1431	1478	1500	1438	1439	1542	1443	1511	1452	1484	1459	1539	1453	1411	1391	1425	1459	1455	1486	1498	1484	1506	1477	1438	1429	1440	1409	893	896	915	938	937	956	965	972	970	951	952	929	920	1031	874	908	943	987	992	941	997
137.937	1426	1436	1474	1508	1433	1455	1548	1455	1511	1456	1482	1447	1551	1446	1396	1395	1425	1455	1467	1476	1499	1493	1490	1472	1441	1432	1441	1421	890	896	913	931	939	954	966	980	958	948	951	927	926	1029	878	894	941	984	993	938	992
138.937	1439	1417	1474	1487	1433	1443	1550	1449	1513	1447	1486	1451	1548	1456	1402	1395	1417	1441	1453	1474	1490	1493	1500	1473	1433	1407	1443	1412	895	895	903	935	939	956	965	975	966	949	950	916	925	1025	873	905	941	981	996	944	990
139.937	1432	1424	1480	1488	1435	1443	1548	1448	1508	1435	1480	1455	1558	1448	1403	1385	1420	1442	1456	1471	1498	1488	1502	1473	1426	1420	1451	1407	894	894	909	931	941	952	970	972	965	944	953	923	927	1034	881	910	938	976	983	947	996
140.937	1434	1417	1473	1477	1431	1435	1545	1447	1500	1430	1474	1450	1537	1463	1391	1389	1416	1437	1455	1467	1490	1489	1487	1477	1429	1413	1434	1414	896	893	904	930	946	961	971	973	956	944	949	921	916	1022	875	896	932	974	987	938	995
141.937	1416	1419	1465	1492	1433	1437	1540	1436	1507	1451	1482	1445	1539	1455	1398	1382	1406	1442	1446	1469	1482	1482	1490	1466	1424	1413	1446	1411	891	893	907	936	925	956	968	973	956	950	946	917	923	1019	874	901	937	980	990	937	999
142.937	1427	1408	1468	1485	1430	1437	1546	1431	1492	1435	1480	1445	1543	1463	1392	1377	1422	1451	1452	1465	1487	1496	1497	1478	1421	1415	1447	1413	895	890	903	929	935	960	962	974	951	942	942	921	929	1020	874	900	930	976	987	942	995
143.937	1419	1427	1464	1480	1429	1436	1545	1447	1496	1426	1478	1447	1539	1446	1403	1382	1406	1444	1448	1463	1481	1477	1488	1466	1423	1421	1429	1419	894	894	909	934	934	948	957	979	960	941	944	923	916	1018	863	906	936	978	985	934	990
144.937	1426	1421	1474	1482	1432	1439	1532	1448	1505	1451	1470	1450	1531	1439	1399	1387	1406	1444	1447	1474	1483	1478	1489	1475	1439	1405	1437	1414	882	888	909	927	925	950	958	971	956	951	946	918	923	1018	875	908	944	975	988	929	987
145.937	1423	1410	1464	1473	1419	1433	1537	1438	1500	1435	1466	1452	1537	1443	1389	1381	1415	1441	1448	1458	1485	1480	1492	1475	1430	1416	1436	1404	889	894	905	932	932	962	971	969	947	946	950	915	922	1023	870	906	932	978	990	937	991
146.937	1422	1423	1459	1482	1427	1433	1535	1429	1511	1434	1476	1438	1539	1453	1392	1382	1412	1441	1434	1464	1486	1479	1487	1459	1419	1403	1434	1416	882	890	899	931	935	950	965	981	950	935	944	916	927	1013	866	901	926	978	989	939	992
147.937	1406	1407	1451	1472	1424	1435	1538	1443	1505	1430	1480	1445	1538	1442	1378	1377	1411	1442	1441	1459	1475	1476	1481	1463	1428	1414	1434	1406	891	888	904	937	935	951	966	980	953	939	934	920	920	1019	877	904	933	980	977	934	991
148.937	1418	1408	1453	1474	1406	1429	1538	1433	1494	1435	1466	1443	1531	1453	1383	1387	1415	1438	1446	1457	1485	1471	1480	1474	1422	1406	1417	1396	885	883	908	930	930	943	961	974	950	938	942	917	926	1018	863	888	931	974	990	935	983
149.937	1420	1411	1458	1482	1427	1431	1552	1431	1488	1428	1482	1439	1539	1451	1383	1377	1398	1438	1438	1462	1489	1481	1476	1469	1418	1408	1426	1401	878	876	913	935	922	943	968	975	956	937	944	919	916	1015	862	902	928	971	979	929	985
150.937	1406	1411	1451	1475	1426	1433	1538	1441	1489	1432	1451	1446	1542	1444	1383	1379	1406	1438	1439	1471	1470	1471	1487	1471	1419	1397	1433	1397	877	881	907	928	938	945	966	980	949	937	940	927	920	1015	866	901	934	974	987	927	983
151.937	1406	1403	1451	1470	1421	1425	1545	1429	1496	1430	1469	1437	1543	1438	1389	1367	1405	1435	1439	1457	1484	1470	1480	1471	1414	1392	1427	1396	885	887	897	935	934	954	959	967	948	944	944	923	922	1009	869	898	924	967	982	935	991
152.937	1404	1394	1451	1478	1423	1423	1533	1433	1496	1439	1485	1436	1530	1443	1381	1379	1405	1443	1433	1441	1474	1476	1485	1459	1429	1401	1416	1403	882	876	899	929	933	950	965	983	950	942	944	912	915	1020	865	893	926	967	978	934	981
153.937	1419	1410	1453	1474	1419	1424	1531	1424	1492	1429	1458	1436	1519	1422	1391	1372	1400	1437	1431	1452	1470	1465	1475	1459	1421	1405	1422	1397	882	884	895	920	928	945	967	975	949	938	946	916	916	1019	867	893	931	972	989	934	984
154.937	1404	1399	1445	1473	1408	1428	1528	1435	1484	1426	1468	1441	1542	1427	1394	1379	1400	1424	1439	1451	1490	1474	1479	1464	1420	1390	1423	1402	882	894	902	933	933	951	962	973	953	941	942	917	914	1017	866	893	930	966	978	939	992
155.937	1411	1408	1456	1475	1411	1424	1525	1431	1486	1430	1465	1436	1526	1440	1386	1375	1404	1437	1438	1454	1473	1472	1480	1462	1408	1388	1422	1399	886	882	904	934	929	944	952	975	951	933	933	909	915	1014	871	897	927	972	983	934	986
156.937	1411	1413	1445	1472	1415	1419	1520	1430	1502	1423	1463	1429	1514	1436	1386	1374	1412	1429	1440	1448	1465	1477	1490	1459	1415	1386	1420	1396	885	893	903	925	930	944	966	975	952	933	935	913	916	1015	857	904	930	974	982	936	984
157.937	1412	1395	1453	1474	1418	1424	1525	1436	1484	1432	1458	1431	1530	1431	1378	1377	1404	1433	1434	1454	1474	1470	1470	1466	1408	1389	1429	1409	893	894	898	928	925	960	952	976	954	940	940	911	913	1009	873	891	921	966	987	937	980
158.937	1401	1406	1456	1474	1413	1431	1525	1418	1489	1427	1470	1442	1517	1440	1370	1384	1398	1423	1436	1454	1470	1463	1472	1459	1407	1388	1411	1404	877	893	897	925	922	936	960	967	943	929	942	913	913	1004	873	898	930	968	984	936	991
159.937	1406	1415	1456	1475	1409	1427	1519	1420	1489	1427	1462	1441	1530	1427	1372	1372	1388	1443	1432	1448	1462	1472	1468	1466	1405	1386	1405	1389	876	882	898	934	923	942	954	971	946	940	932	912	900	1019	863	892	925	965	978	929	980
160.937	1404	1392	1447	1468	1403	1422	1525	1427	1479	1416	1459	1428	1516	1427	1369	1371	1394	1419	1434	1458	1467	1461	1481	1456	1413	1391	1421	1391	874	877	893	923	928	942	958	962	943	937	941	913	917	1017	857	889	921	963	979	922	978
161.937	1409	1392	1433	1467	1408	1411	1523	1420	1483	1415	1459	1427	1521	1429	1383	1377	1398	1427	1422	1442	1472	1456	1472	1443	1407	1390	1406	1393	882	887	896	920	928	943	948	965	948	935	936	914	908	1009	867	897	922	965	977	924	982
162.937	1395	1398	1446	1470	1414	1417	1535	1417	1488	1420	1448	1432	1519	1417	1373	1374	1393	1426	1433	1456	1459	1461	1480	1450	1413	1393	1415	1391	873	891	905	929	922	952	961	966	954	939	941	914	910	1015	847	893	932	969	984	937	984
163.937	1395	1403	1450	1467	1402	1417	1539	1413	1484	1413	1455	1437	1517	1427	1376	1366	1394	1428	1423	1442	1472	1453	1470	1447	1399	1384	1420	1389	883	895	892	928	931	943	963	970	954	937	934	921	913	1009	874	892	925	968	975	932	983
164.937	1402	1404	1445	1458	1407	1415	1519	1417	1483	1423	1454	1418	1525	1431	1376	1375	1392	1422	1440	1454	1468	1468	1464	1451	1407	1392	1415	1393	878	888	903	916	927	949	957	965	948	940	940	913	922	1021	857	898	925	965	981	923	976
165.937	1395	1391	1436	1463	1401	1422	1512	1415	1495	1407	1457	1420	1510	1429	1381	1366	1393	1420	1433	1455	1465	1463	1464	1445	1415	1391	1402	1379	878	890	900	929	928	947	953	972	952	939	937	921	911	1018	867	896	924	971	982	928	982
166.937	1404	1392	1440	1465	1415	1418	1520	1417	1477	1418	1446	1429	1515	1421	1373	1377	1398	1421	1428	1445	1460	1463	1473	1438	1412	1391	1401	1399	885	876	899	918	921	950	959	967	942	940	938	914	914	1018	862	893	916	967	979	930	979
167.937	1402	1396	1435	1461	1400	1419	1508	1413	1481	1418	1466	1423	1510	1434	1369	1369	1382	1416	1417	1436	1469	1465	1467	1458	1396	1389	1399	1392	885	877	904	920	932	941	955	970	952	938	936	910	920	1011	858	890	924	968	982	926	971
168.937	1401	1395	1440	1459	1409	1417	1520	1413	1479	1417	1453	1424	1521	1418	1373	1360	1388	1415	1428	1442	1465	1458	1467	1440	1406	1383	1411	1377	885	875	896	930	919	942	945	967	945	932	935	900	913	1011	857	884	927	967	976	929	971
169.937	1391	1390	1442	1446	1408	1410	1510	1419	1458	1412	1453	1420	1511	1426	1372	1362	1382	1410	1423	1433	1456	1462	1462	1448	1392	1389	1405	1392	865	881	892	923	921	941	952	972	942	938	937	915	891	1002	851	891	922	963	975	920	979
170.937	1399	1374	1438	1465	1402	1412	1514	1414	1478	1405	1440	1419	1514	1412	1368	1359	1382	1419	1419	1441	1461	1451	1465	1435	1393	1381	1405	1379	874	876	893	915	912	950	949	965	944	938	936	915	906	1013	861	889	917	961	973	924	980
171.937	1392	1382	1435	1454	1402	1415	1516	1400	1469	1415	1448	1428	1514	1422	1374	1366	1394	1419	1422	1435	1459	1447	1458	1441	1399	1375	1405	1377	879	888	901	918	927	932	946	953	943	930	930	909	906	1009	860	894	929	961	972	926	986
172.937	1392	1383	1435	1449	1402	1405	1512	1413	1468	1412	1444	1415	1514	1414	1378	1359	1387	1412	1417	1438	1443	1458	1456	1428	1399	1383	1414	1386	882	875	896	912	917	945	948	964	942	937	930	910	904	1013	860	892	917	966	972	928	970
173.937	1387	1398	1433	1463	1397	1401	1512	1415	1477	1407	1452	1423	1521	1414	1376	1357	1388	1413	1418	1441	1449	1450	1456	1440	1399	1384	1409	1378	885	879	889	913	922	943	960	965	943	933	934	909	908	1006	860	888	915	964	980	917	984
174.937	1405	1395	1431	1463	1401	1419	1508	1418	1475	1407	1452	1401	1514	1423	1378	1357	1386	1417	1411	1434	1453	1445	1458	1445	1400	1379	1404	1382	879	875	899	918	923	948	952	965	938	929	940	905	908	1006	862	894	915	965	969	930	976
175.937	1384	1387	1417	1456	1397	1407	1503	1415	1478	1407	1441	1418	1501	1423	1366	1359	1392	1402	1424	1431	1456	1449	1452	1432	1390	1376	1403	1379	874	878	890	922	918	952	951	962	940	941	940	906	907	1004	867	892	924	963	975	918	977
176.937	1398	1390	1438	1454	1394	1406	1506	1405	1467	1418	1447	1418	1514	1423	1363	1369	1376	1406	1421	1436	1452	1461	1456	1443	1409	1386	1397	1382	877	872	890	927	923	943	954	960	944	934	930	903	906	1014	852	891	925	970	976	927	981
177.937	1394	1399	1432	1453	1394	1408	1507	1417	1478	1401	1449	1415	1506	1414	1377	1367	1381	1413	1401	1436	1456	1456	1459	1443	1391	1378	1404	1371	873	882	892	912	924	935	937	970	942	933	932	908	908	1017	857	893	917	965	975	917	977
178.937	1385	1387	1435	1443	1385	1410	1497	1407	1459	1400	1447	1403	1507	1405	1368	1356	1376	1413	1417	1436	1450	1451	1459	1435	1388	1372	1404	1383	868	882	890	928	920	942	950	958	940	919	929	901	903	1010	858	888	924	968	977	922	981
179.937	1376	1381	1420	1450	1403	1412	1506	1413	1474	1409	1441	1413	1505	1406	1366	1350	1379	1406	1407	1429	1456	1455	1444	1427	1389	1377	1396	1378	871	872	891	920	920	938	950	965	941	932	940	896	910	1010	852	888	921	956	984	922	969
180.937	1391	1384	1423	1454	1401	1405	1516	1412	1467	1406	1447	1418	1498	1413	1360	1364	1392	1401	1406	1427	1441	1455	1456	1437	1394	1381	1403	1376	873	864	897	916	918	937	942	962	935	933	931	896	911	1001	859	884	918	972	969	927	976
181.937	1397	1378	1424	1444	1387	1401	1496	1394	1466	1409	1437	1414	1505	1406	1364	1351	1387	1416	1414	1426	1453	1456	1450	1435	1396	1360	1396	1368	874	883	887	921	923	935	957	966	941	932	930	899	906	1004	852	893	914	973	977	922	977
182.937	1385	1379	1422	1458	1389	1390	1496	1397	1463	1394	1438	1410	1492	1409	1357	1353	1374	1412	1416	1437	1452	1443	1461	1435	1397	1369	1380	1366	868	873	884	921	917	937	950	956	939	925	931	900	904	1002	854	884	912	964	976	920	975
183.937	1377	1383	1424	1441	1390	1407	1496	1402	1464	1406	1442	1409	1492	1417	1356	1350	1379	1403	1412	1433	1443	1449	1458	1433	1396	1356	1401	1361	868	876	890	918	915	943	942	955	936	924	936	893	899	998	855	890	922	953	974	925	970
184.937	1384	1384	1429	1443	1391	1390	1507	1409	1456	1396	1431	1408	1489	1412	1357	1354	1376	1406	1401	1427	1444	1445	1449	1442	1389	1360	1391	1371	867	875	890	908	907	936	946	962	929	930	933	895	907	997	847	881	913	957	981	921	970
185.937	1369	1382	1433	1444	1390	1387	1488	1408	1474	1383	1437	1408	1507	1408	1359	1357	1379	1401	1415	1434	1449	1441	1456	1437	1388	1367	1383	1367	865	875	893	919	921	935	946	954	935	923	931	910	905	1011	851	888	912	955	973	923	973
186.937	1378	1381	1422	1456	1390	1405	1503	1407	1464	1393	1435	1413	1493	1408	1351	1350	1385	1409	1407	1430	1437	1448	1451	1432	1396	1375	1397	1379	874	877	889	923	920	925	947	950	927	926	926	899	901	1001	852	900	916	963	961	917	971
187.937	1367	1371	1431	1439	1383	1410	1509	1406	1453	1409	1436	1406	1502	1401	1357	1353	1372	1394	1412	1425	1436	1439	1441	1425	1393	1360	1391	1372	877	868	890	912	919	939	953	957	923	926	928	906	906	1004	853	882	915	960	972	926	967
188.937	1376	1377	1426	1440	1397	1399	1504	1389	1461	1395	1436	1415	1501	1403	1347	1357	1369	1406	1412	1418	1446	1449	1452	1436	1384	1364	1392	1374	871	874	895	908	912	942	953	960	931	925	920	913	906	1002	855	886	914	951	977	920	968
189.937	1380	1374	1432	1455	1383	1394	1491	1406	1462	1399	1432	1405	1497	1400	1348	1343	1373	1394	1401	1429	1445	1440	1449	1419	1381	1361	1403	1362	874	881	890	907	918	937	949	961	938	925	930	898	897	1005	846	887	917	957	964	924	971
190.937	1385	1373	1419	1449	1396	1406	1507	1408	1467	1399	1438	1410	1493	1393	1353	1359	1374	1393	1400	1425	1443	1442	1447	1426	1390	1359	1390	1377	871	868	888	910	910	936	955	953	936	923	929	900	902	1005	846	889	917	952	974	912	963
191.937	1380	1378	1413	1446	1382	1395	1502	1408	1455	1404	1429	1397	1497	1392	1356	1353	1368	1398	1408	1425	1445	1435	1444	1427	1379	1362	1393	1357	871	873	891	913	920	927	942	955	940	927	928	910	900	990	845	887	914	959	965	922	968
192.937	1380	1373	1420	1440	1383	1380	1494	1393	1459	1383	1425	1403	1508	1409	1351	1351	1361	1405	1406	1421	1438	1432	1443	1425	1379	1368	1379	1364	872	878	878	908	916	934	948	955	924	923	923	896	910	998	853	877	915	953	974	916	953
193.937	1380	1373	1411	1459	1378	1387	1488	1390	1457	1388	1422	1406	1494	1405	1346	1351	1375	1403	1401	1427	1440	1438	1453	1427	1378	1357	1391	1348	866	873	877	908	903	927	943	962	934	929	920	896	900	1004	845	869	905	956	976	922	969
194.937	1371	1370	1404	1448	1385	1386	1502	1402	1461	1404	1441	1392	1488	1401	1353	1346	1373	1410	1404	1422	1432	1433	1445	1427	1390	1348	1395	1366	866	874	887	905	915	936	941	951	923	931	921	900	904	993	846	879	919	954	973	916	974
195.937	1374	1374	1422	1448	1382	1396	1496	1402	1461	1390	1431	1399	1488	1391	1346	1344	1366	1396	1394	1420	1429	1432	1435	1415	1383	1364	1389	1363	865	870	878	909	907	925	939	961	936	930	926	899	899	997	845	884	910	959	966	914	969
196.937	1376	1373	1401	1449	1391	1389	1499	1401	1456	1399	1448	1394	1494	1392	1344	1351	1367	1402	1408	1407	1446	1437	1451	1427	1376	1375	1378	1363	872	873	883	923	912	938	950	950	928	930	931	899	891	995	843	885	907	960	974	913	963
197.937	1366	1377	1420	1431	1379	1401	1495	1394	1459	1399	1421	1397	1478	1400	1344	1350	1374	1405	1402	1421	1441	1430	1443	1421	1382	1359	1387	1366	866	865	882	915	911	932	942	943	931	924	932	899	906	998	850	887	918	958	976	911	975
198.937	1376	1366	1414	1431	1389	1390	1497	1391	1456	1393	1431	1408	1502	1391	1350	1346	1368	1392	1397	1414	1429	1430	1424	1421	1368	1370	1389	1376	856	872	885	912	905	937	946	945	936	922	928	902	897	993	855	882	917	956	971	919	961
199.937	1377	1369	1414	1441	1391	1392	1490	1402	1453	1393	1436	1395	1479	1397	1355	1338	1367	1389	1401	1413	1429	1427	1447	1428	1381	1364	1379	1368	866	872	888	910	917	922	948	947	929	922	928	904	909	1002	851	879	908	950	967	914	960
200.937	1371	1383	1423	1436	1388	1386	1489	1393	1455	1390	1426	1406	1494	1395	1339	1355	1362	1400	1396	1412	1442	1434	1432	1418	1379	1361	1378	1367	861	863	885	905	908	934	939	952	933	924	920	897	903	997	851	882	909	958	963	910	962
201.937	1370	1371	1409	1444	1383	1387	1491	1390	1458	1388	1430	1397	1484	1391	1355	1340	1361	1388	1394	1425	1433	1430	1454	1422	1373	1357	1383	1376	868	873	886	915	918	929	943	957	939	917	921	895	890	1006	845	885	908	956	971	916	966
202.937	1373	1371	1406	1438	1387	1390	1483	1397	1447	1383	1432	1396	1493	1396	1355	1343	1378	1389	1403	1420	1443	1426	1443	1410	1375	1356	1371	1359	866	865	883	919	900	930	946	954	926	915	919	901	897	1002	851	884	912	950	967	914	966
203.937	1378	1374	1405	1450	1377	1398	1483	1395	1441	1387	1419	1396	1484	1382	1344	1344	1372	1394	1399	1411	1426	1426	1438	1417	1383	1359	1379	1359	869	869	885	910	906	921	950	949	936	917	917	898	891	996	860	877	911	953	969	911	976
204.937	1358	1375	1414	1445	1376	1392	1477	1396	1463	1392	1429	1392	1493	1391	1344	1339	1364	1399	1391	1415	1432	1430	1423	1408	1366	1372	1384	1367	860	866	878	917	910	932	937	950	923	913	916	893	902	1000	850	880	904	947	958	922	968
205.937	1365	1365	1411	1438	1379	1386	1480	1396	1442	1389	1418	1397	1489	1384	1342	1344	1367	1399	1395	1416	1428	1435	1435	1414	1378	1359	1379	1353	856	872	886	907	915	929	934	949	930	915	916	902	901	993	846	880	915	956	974	913	961
206.937	1374	1371	1411	1429	1378	1389	1483	1387	1459	1394	1421	1397	1488	1384	1348	1345	1370	1385	1384	1412	1429	1427	1428	1407	1382	1352	1377	1366	863	874	877	906	904	926	940	946	931	917	911	897	898	992	842	876	909	956	961	914	971
207.937	1374	1366	1418	1431	1384	1388	1480	1391	1447	1382	1432	1387	1480	1383	1334	1340	1370	1382	1392	1414	1434	1439	1452	1413	1369	1359	1377	1354	863	869	884	900	915	934	940	945	927	929	920	895	896	989	851	879	911	953	969	912	967
208.937	1381	1370	1417	1433	1378	1388	1482	1395	1450	1383	1421	1400	1470	1382	1352	1339	1367	1395	1395	1411	1433	1439	1431	1418	1361	1357	1374	1358	868	872	890	901	909	921	939	946	931	922	917	894	898	987	846	880	910	952	968	906	965
209.937	1360	1358	1408	1441	1379	1380	1487	1383	1448	1386	1421	1397	1475	1380	1343	1339	1362	1395	1382	1408	1427	1434	1423	1418	1378	1362	1367	1356	861	868	883	903	903	930	938	948	921	915	924	892	886	993	844	892	919	947	964	910	954
210.937	1366	1375	1404	1421	1373	1381	1477	1391	1452	1394	1420	1383	1487	1389	1350	1334	1366	1395	1385	1422	1434	1427	1435	1414	1367	1354	1374	1359	858	865	895	906	909	934	929	946	935	917	924	892	898	1004	848	878	907	952	953	899	959
211.937	1363	1367	1409	1444	1379	1389	1476	1394	1453	1384	1420	1397	1479	1392	1346	1340	1363	1395	1391	1408	1418	1440	1429	1425	1367	1359	1377	1356	868	861	883	912	908	924	933	952	927	915	919	888	895	994	843	877	911	947	964	910	971
212.937	1369	1365	1410	1434	1370	1387	1490	1388	1441	1384	1425	1386	1464	1391	1352	1335	1362	1378	1392	1412	1427	1426	1427	1413	1370	1341	1367	1353	863	863	879	908	902	924	934	951	927	916	917	896	885	995	846	876	909	948	962	908	967
213.937	1369	1361	1419	1441	1379	1383	1487	1396	1455	1384	1429	1391	1468	1379	1344	1353	1357	1385	1393	1419	1412	1423	1432	1419	1378	1347	1371	1362	863	864	879	905	909	923	929	938	926	929	916	890	898	1000	842	863	901	941	971	910	964
214.937	1366	1353	1414	1433	1372	1387	1489	1390	1447	1381	1426	1403	1474	1386	1335	1335	1367	1384	1396	1398	1427	1432	1428	1414	1364	1372	1380	1359	854	858	884	906	904	923	940	956	930	913	919	897	890	993	838	878	909	952	950	914	964
215.937	1356	1358	1427	1444	1387	1374	1482	1385	1442	1375	1405	1386	1473	1391	1343	1340	1358	1385	1389	1415	1428	1426	1428	1408	1370	1360	1373	1348	862	863	873	901	908	926	936	948	924	911	919	892	890	986	829	890	913	951	962	905	967
216.937	1369	1369	1405	1433	1370	1392	1475	1396	1447	1378	1425	1392	1480	1372	1331	1331	1360	1391	1388	1400	1429	1433	1422	1415	1375	1349	1365	1354	861	860	882	905	909	931	938	950	933	924	920	900	895	994	844	887	900	948	964	913	959
217.937	1365	1358	1405	1419	1376	1381	1483	1381	1441	1388	1411	1387	1473	1392	1337	1330	1354	1381	1387	1401	1436	1430	1430	1406	1371	1354	1362	1342	863	860	884	900	914	923	941	950	930	925	918	892	901	978	844	879	909	949	961	908	960
218.937	1346	1370	1411	1430	1375	1378	1480	1393	1445	1370	1413	1390	1474	1386	1340	1354	1366	1381	1396	1413	1420	1427	1420	1395	1368	1357	1371	1358	857	863	880	914	905	918	936	951	929	921	915	895	901	986	835	873	910	954	959	911	963
219.937	1348	1366	1413	1420	1378	1380	1470	1381	1446	1392	1418	1397	1466	1387	1339	1339	1358	1380	1387	1407	1411	1417	1421	1403	1368	1350	1371	1356	858	863	880	901	900	921	929	949	927	915	923	886	891	993	850	873	908	943	960	908	960
220.937	1356	1353	1391	1420	1370	1378	1484	1379	1436	1382	1421	1401	1470	1384	1339	1330	1367	1395	1385	1413	1428	1422	1441	1412	1356	1341	1379	1352	866	864	878	909	909	929	937	953	927	916	921	882	883	988	845	879	899	944	956	913	954
221.937	1351	1358	1404	1421	1367	1384	1480	1376	1442	1384	1419	1392	1468	1376	1338	1325	1362	1375	1384	1406	1424	1418	1431	1405	1356	1360	1373	1352	863	861	878	901	901	922	936	946	929	916	917	891	893	986	851	878	900	949	963	897	963
222.937	1356	1359	1409	1426	1372	1375	1470	1382	1442	1372	1409	1390	1468	1379	1348	1344	1361	1380	1389	1399	1423	1431	1427	1419	1355	1354	1360	1352	860	865	879	906	910	925	934	950	924	919	922	884	895	993	848	884	905	949	969	916	962
223.937	1352	1350	1404	1433	1384	1384	1481	1388	1437	1381	1408	1390	1474	1383	1338	1343	1378	1384	1389	1415	1424	1420	1427	1403	1367	1348	1371	1362	856	860	883	905	912	928	938	947	931	922	917	892	891	987	840	884	911	944	962	909	962
224.937	1356	1358	1410	1425	1372	1383	1477	1381	1446	1376	1419	1382	1464	1391	1339	1333	1344	1385	1392	1402	1420	1435	1429	1420	1355	1334	1364	1359	854	858	875	913	906	925	933	943	925	914	914	888	898	990	835	879	908	949	960	903	961
225.937	1367	1350	1405	1424	1371	1377	1474	1388	1432	1372	1404	1385	1471	1378	1331	1326	1351	1382	1386	1401	1413	1424	1420	1396	1374	1340	1362	1337	858	872	875	905	905	935	928	955	917	907	911	897	881	983	845	880	905	944	963	907	960
226.937	1359	1359	1400	1426	1369	1372	1469	1377	1442	1372	1416	1382	1479	1374	1331	1331	1364	1385	1389	1398	1411	1416	1427	1419	1364	1348	1360	1354	858	854	882	901	903	915	937	946	929	907	912	891	888	994	844	880	899	954	954	905	960
227.937	1355	1346	1400	1422	1370	1382	1480	1387	1442	1373	1409	1376	1463	1374	1344	1331	1358	1378	1382	1400	1418	1431	1421	1405	1356	1354	1365	1352	866	860	875	908	905	917	927	944	922	911	911	893	895	989	846	878	908	949	963	904	951
228.937	1356	1345	1393	1415	1382	1368	1472	1382	1437	1372	1415	1385	1456	1386	1338	1329	1356	1373	1373	1401	1410	1422	1429	1405	1353	1346	1362	1346	847	852	883	901	907	916	925	944	924	921	915	888	884	984	832	876	902	948	961	916	958
229.937	1366	1357	1410	1425	1369	1388	1464	1383	1431	1378	1414	1385	1469	1384	1344	1331	1362	1382	1382	1397	1425	1422	1426	1404	1366	1344	1364	1347	866	866	877	904	910	917	933	944	920	917	922	887	897	996	831	876	903	947	961	908	957
230.937	1349	1353	1402	1417	1366	1378	1477	1377	1431	1372	1424	1386	1459	1372	1340	1329	1351	1377	1384	1404	1413	1427	1407	1412	1354	1339	1358	1342	858	864	875	906	915	914	933	944	918	911	909	891	886	981	839	869	898	946	954	902	962
231.937	1348	1349	1390	1415	1366	1375	1480	1384	1430	1360	1409	1375	1460	1379	1337	1322	1348	1372	1373	1404	1407	1412	1417	1400	1359	1345	1367	1337	850	861	875	899	906	915	931	946	925	913	913	881	888	989	834	867	899	941	956	903	959
232.937	1358	1346	1406	1426	1378	1376	1481	1376	1434	1373	1414	1375	1461	1374	1337	1326	1338	1375	1372	1402	1409	1404	1429	1406	1349	1338	1358	1348	849	860	874	901	904	922	931	944	918	913	917	882	890	985	825	877	907	950	949	901	955
233.937	1353	1342	1404	1421	1369	1369	1476	1371	1440	1364	1408	1382	1473	1374	1324	1326	1349	1370	1382	1405	1418	1431	1417	1400	1359	1339	1355	1333	851	855	873	902	906	917	939	937	927	902	912	893	897	985	839	873	901	948	950	905	955
234.937	1345	1353	1388	1417	1367	1364	1464	1379	1435	1383	1408	1380	1471	1376	1331	1326	1354	1370	1377	1392	1415	1420	1412	1395	1358	1350	1360	1347	854	858	877	900	904	920	927	939	928	914	911	886	885	988	836	871	895	944	953	900	953
235.937	1356	1348	1410	1422	1373	1378	1462	1384	1442	1369	1410	1382	1463	1372	1320	1326	1348	1371	1376	1395	1410	1424	1424	1399	1360	1337	1358	1346	844	856	871	906	898	925	927	946	926	911	922	884	881	996	839	873	909	941	954	901	951
236.937	1351	1358	1396	1420	1363	1366	1468	1382	1431	1358	1411	1367	1466	1371	1331	1329	1354	1384	1377	1394	1418	1412	1423	1403	1358	1342	1364	1358	850	852	875	900	906	918	928	943	919	912	908	885	887	988	837	868	896	948	958	902	952
237.937	1352	1353	1397	1419	1360	1380	1476	1384	1430	1372	1420	1372	1461	1369	1334	1320	1349	1368	1377	1409	1416	1412	1426	1399	1353	1339	1361	1348	857	857	872	903	898	915	931	949	914	909	909	885	888	987	832	870	905	941	964	905	952
238.937	1351	1354	1393	1417	1372	1375	1476	1385	1439	1380	1408	1367	1459	1382	1326	1338	1346	1377	1382	1401	1416	1409	1422	1391	1354	1338	1366	1334	855	859	875	897	906	916	929	942	923	922	908	895	884	985	839	865	904	949	957	903	962
239.937	1346	1353	1387	1404	1363	1370	1471	1375	1437	1370	1408	1371	1465	1362	1340	1324	1348	1365	1367	1407	1415	1425	1408	1398	1349	1337	1367	1341	856	860	867	905	900	923	929	943	921	913	913	886	888	978	838	864	898	938	953	907	960
240.937	1353	1342	1390	1416	1358	1375	1465	1371	1429	1359	1402	1371	1460	1375	1330	1334	1349	1367	1381	1405	1410	1416	1420	1396	1352	1349	1367	1339	844	857	873	898	902	911	926	937	917	914	918	875	893	987	839	870	902	942	957	903	954
241.937	1353	1354	1397	1412	1353	1366	1471	1372	1439	1372	1410	1380	1452	1369	1322	1313	1350	1382	1376	1391	1403	1411	1417	1388	1349	1325	1364	1343	852	856	872	898	894	910	928	940	922	912	906	886	888	981	832	876	903	933	958	907	948
242.937	1345	1337	1382	1412	1352	1365	1472	1377	1426	1363	1403	1376	1461	1354	1334	1319	1349	1370	1379	1397	1417	1419	1408	1390	1362	1335	1353	1339	854	861	865	903	906	920	933	944	918	909	911	878	885	989	836	866	897	944	962	910	958
243.937	1339	1344	1393	1421	1365	1371	1469	1373	1439	1357	1399	1383	1469	1375	1330	1315	1342	1373	1377	1392	1424	1415	1405	1403	1346	1339	1361	1344	843	857	870	895	902	915	923	939	921	915	915	886	883	992	834	865	905	941	948	906	951
244.937	1351	1340	1395	1421	1370	1369	1456	1382	1431	1366	1399	1385	1463	1357	1309	1323	1343	1374	1365	1395	1415	1414	1417	1397	1353	1327	1350	1338	862	851	867	895	906	920	939	942	925	908	913	880	892	989	832	865	897	938	949	904	948
245.937	1365	1336	1391	1415	1364	1378	1467	1376	1430	1361	1405	1377	1454	1365	1330	1324	1342	1366	1362	1395	1411	1406	1414	1390	1347	1330	1344	1343	849	861	870	902	900	921	917	936	916	908	905	885	892	984	839	863	900	949	962	903	958
246.937	1351	1342	1391	1409	1363	1363	1469	1378	1431	1364	1402	1378	1454	1369	1339	1338	1340	1368	1362	1386	1405	1414	1419	1387	1348	1339	1358	1338	847	852	869	897	906	913	928	940	922	914	912	895	884	989	831	859	901	941	951	901	951
247.937	1335	1352	1400	1416	1354	1374	1470	1372	1439	1366	1391	1381	1463	1379	1324	1328	1337	1371	1364	1389	1416	1408	1416	1414	1351	1333	1350	1343	858	851	878	899	894	910	926	934	918	910	906	892	883	975	842	858	897	940	960	901	951
248.937	1348	1337	1384	1410	1358	1364	1471	1368	1440	1363	1410	1367	1457	1366	1334	1329	1346	1364	1376	1393	1397	1406	1416	1395	1347	1338	1350	1338	851	858	862	891	897	920	925	950	922	910	903	891	886	981	836	869	903	942	951	901	953
249.937	1348	1352	1392	1406	1355	1364	1468	1375	1420	1369	1400	1377	1455	1369	1329	1325	1350	1360	1372	1383	1416	1403	1415	1395	1356	1349	1361	1334	843	867	871	893	897	915	927	936	925	913	908	888	885	984	831	868	903	942	948	901	952
250.937	1337	1346	1390	1400	1355	1365	1469	1377	1431	1359	1409	1367	1445	1370	1316	1312	1345	1359	1379	1394	1399	1407	1412	1393	1344	1332	1350	1336	845	852	866	906	903	914	918	940	923	910	914	885	885	983	836	865	897	941	952	902	962
251.937	1341	1342	1384	1412	1357	1361	1464	1372	1435	1372	1402	1377	1461	1366	1318	1320	1343	1374	1370	1399	1408	1416	1407	1384	1344	1325	1352	1334	849	851	876	901	893	921	930	933	917	912	906	890	878	983	836	875	897	941	964	905	949
252.937	1344	1333	1391	1416	1354	1358	1464	1372	1435	1365	1397	1382	1463	1361	1320	1322	1351	1372	1373	1386	1395	1414	1421	1391	1353	1331	1350	1349	860	858	871	889	902	914	933	944	915	901	907	886	884	986	834	875	897	938	953	907	950
253.937	1337	1344	1390	1401	1363	1370	1471	1367	1431	1360	1400	1375	1469	1375	1322	1324	1334	1364	1379	1390	1418	1411	1419	1396	1346	1328	1349	1346	858	858	874	899	894	922	918	940	927	910	909	886	881	983	837	877	897	936	952	904	962
254.937	1332	1327	1382	1426	1367	1376	1461	1373	1436	1360	1406	1376	1457	1358	1326	1323	1348	1367	1373	1390	1408	1403	1412	1391	1343	1342	1342	1337	858	846	869	895	895	914	930	939	927	896	904	882	881	971	834	871	905	941	952	908	955
255.937	1345	1336	1387	1421	1369	1357	1453	1376	1426	1358	1392	1382	1460	1369	1318	1320	1342	1366	1376	1391	1402	1407	1415	1391	1339	1334	1353	1334	858	863	870	898	893	912	930	938	923	911	907	886	889	980	830	864	886	946	952	904	962
256.937	1339	1348	1391	1409	1359	1369	1462	1367	1423	1369	1406	1371	1452	1363	1320	1324	1344	1381	1364	1382	1403	1399	1404	1388	1346	1341	1354	1337	851	854	875	891	893	913	927	934	921	917	906	886	880	988	839	861	898	936	948	897	962
257.937	1348	1345	1377	1407	1359	1368	1461	1359	1434	1363	1405	1375	1455	1361	1322	1318	1342	1372	1366	1375	1404	1409	1405	1391	1346	1338	1350	1333	847	854	863	893	898	909	923	937	912	907	912	885	883	977	829	867	896	938	950	902	955
258.937	1348	1349	1379	1407	1358	1354	1464	1366	1431	1343	1395	1367	1470	1369	1318	1318	1346	1365	1371	1387	1407	1410	1414	1395	1346	1330	1353	1344	849	850	880	899	900	921	931	940	912	908	902	883	885	971	831	880	900	947	949	906	953
259.937	1346	1350	1391	1407	1357	1369	1453	1364	1417	1371	1387	1366	1454	1372	1335	1323	1345	1370	1373	1385	1407	1407	1406	1388	1338	1324	1350	1334	846	855	872	903	894	912	923	939	919	903	912	880	885	981	837	875	897	937	954	907	949
260.937	1346	1345	1397	1411	1360	1364	1465	1362	1426	1365	1397	1369	1466	1359	1320	1331	1349	1365	1379	1387	1407	1408	1405	1385	1347	1334	1354	1336	846	856	874	902	914	917	930	937	911	907	906	886	887	992	840	864	890	934	958	895	946
261.937	1338	1344	1373	1407	1352	1361	1469	1353	1424	1354	1402	1376	1452	1354	1324	1317	1340	1367	1374	1383	1403	1410	1407	1400	1349	1333	1347	1343	849	857	873	893	901	916	925	931	915	911	900	881	880	983	825	863	896	938	956	901	948
262.937	1344	1341	1391	1404	1359	1358	1457	1367	1423	1363	1399	1358	1457	1354	1313	1322	1343	1363	1374	1380	1405	1404	1411	1392	1352	1334	1339	1333	851	854	869	900	902	916	930	929	919	906	912	887	878	986	831	868	895	941	950	900	950
263.937	1345	1338	1381	1402	1364	1364	1464	1362	1430	1370	1404	1363	1447	1371	1316	1326	1338	1373	1362	1384	1403	1409	1403	1389	1347	1328	1342	1334	857	856	871	892	893	914	935	937	915	909	907	882	880	977	837	875	896	942	946	900	951
264.937	1341	1346	1379	1412	1358	1360	1456	1367	1430	1349	1400	1361	1463	1354	1313	1324	1342	1360	1362	1383	1418	1406	1407	1392	1347	1331	1355	1329	852	855	874	900	890	917	925	936	916	912	903	886	883	981	834	865	898	940	962	897	948
265.937	1330	1346	1392	1422	1361	1354	1457	1368	1428	1363	1395	1373	1455	1376	1314	1320	1346	1364	1367	1376	1397	1404	1397	1382	1346	1328	1358	1344	841	859	870	894	902	913	920	936	917	900	898	885	879	983	837	861	898	937	959	901	951
266.937	1342	1352	1379	1395	1347	1359	1467	1364	1421	1365	1395	1376	1437	1354	1318	1309	1334	1359	1371	1384	1394	1407	1400	1387	1352	1328	1356	1341	846	851	870	902	908	922	926	937	917	901	913	878	880	981	827	867	897	939	948	897	947
267.937	1341	1346	1386	1417	1348	1360	1458	1365	1419	1360	1400	1362	1452	1357	1307	1317	1342	1367	1366	1377	1400	1399	1404	1380	1346	1326	1356	1334	851	855	870	891	893	911	917	945	914	910	905	887	883	973	824	865	894	932	957	907	948
268.937	1341	1325	1390	1411	1359	1361	1463	1366	1417	1358	1404	1367	1450	1349	1320	1312	1348	1354	1365	1378	1407	1404	1405	1392	1334	1319	1341	1341	844	855	869	894	897	918	934	937	912	900	898	880	881	986	832	865	889	935	947	905	947
269.937	1324	1327	1377	1409	1348	1363	1455	1361	1414	1363	1394	1367	1459	1367	1314	1324	1323	1366	1363	1391	1407	1409	1411	1377	1346	1324	1350	1344	839	855	860	894	897	922	918	936	920	906	909	885	880	987	832	861	893	934	956	904	951
270.937	1344	1327	1395	1395	1355	1358	1458	1353	1420	1350	1387	1362	1450	1350	1307	1314	1328	1366	1367	1383	1402	1401	1406	1378	1330	1331	1341	1328	844	848	869	893	895	898	929	942	913	905	907	877	875	977	832	869	892	934	951	899	948
271.937	1338	1338	1379	1399	1352	1351	1455	1371	1424	1357	1394	1366	1456	1359	1313	1324	1338	1361	1365	1380	1393	1402	1406	1380	1330	1338	1337	1342	850	849	872	892	894	915	923	938	911	906	907	880	873	978	832	862	897	938	945	896	938
272.937	1331	1334	1378	1400	1357	1359	1459	1366	1419	1350	1397	1361	1466	1346	1325	1324	1337	1366	1361	1389	1400	1410	1409	1387	1344	1330	1350	1321	841	855	862	893	903	907	929	937	922	908	907	877	885	980	831	859	896	935	953	901	951
273.937	1334	1336	1395	1397	1354	1354	1462	1361	1419	1353	1389	1362	1452	1371	1318	1309	1334	1368	1363	1378	1402	1398	1400	1388	1339	1347	1347	1334	847	847	869	900	885	905	922	936	912	907	907	885	882	977	834	865	903	939	946	901	949
274.937	1341	1332	1384	1416	1361	1360	1464	1367	1419	1354	1403	1362	1455	1353	1314	1315	1333	1351	1364	1378	1401	1409	1407	1378	1336	1319	1358	1329	845	851	867	895	891	924	931	933	917	911	903	885	874	977	829	864	890	936	952	901	955
275.937	1341	1336	1374	1397	1351	1360	1451	1368	1419	1363	1392	1364	1456	1362	1307	1322	1329	1356	1363	1380	1397	1399	1394	1382	1353	1323	1348	1334	843	850	870	888	888	910	930	938	913	895	903	881	880	977	827	866	893	937	945	894	947
276.937	1346	1334	1379	1402	1347	1368	1450	1364	1428	1352	1393	1373	1452	1363	1322	1318	1337	1353	1355	1384	1393	1399	1391	1377	1333	1326	1347	1329	839	849	864	897	894	909	925	934	917	911	905	878	882	977	831	855	889	939	950	906	948
277.937	1345	1338	1372	1407	1345	1351	1451	1362	1431	1357	1395	1369	1452	1357	1316	1314	1345	1360	1366	1383	1389	1399	1406	1388	1332	1338	1349	1348	846	847	862	897	882	911	921	935	913	896	902	876	879	978	821	870	886	933	950	904	947
278.937	1331	1344	1377	1402	1345	1357	1461	1370	1428	1349	1395	1354	1451	1358	1316	1303	1342	1356	1363	1378	1393	1401	1401	1385	1343	1322	1333	1331	850	852	866	899	890	918	927	935	915	899	900	878	883	973	832	867	904	943	956	908	949
279.937	1342	1332	1384	1406	1345	1363	1444	1360	1420	1348	1386	1364	1451	1341	1314	1319	1335	1360	1367	1385	1401	1406	1406	1387	1336	1323	1335	1323	850	856	876	891	891	911	924	934	914	901	913	881	879	978	830	865	893	948	947	897	955
280.937	1335	1336	1378	1399	1357	1359	1452	1362	1428	1355	1389	1355	1452	1358	1305	1310	1351	1368	1354	1383	1396	1400	1412	1375	1344	1332	1342	1322	854	847	866	885	889	915	928	939	915	902	905	883	875	970	827	865	897	937	949	891	947
281.937	1331	1342	1392	1396	1349	1355	1450	1366	1409	1361	1405	1363	1452	1357	1314	1307	1337	1360	1362	1375	1395	1388	1406	1377	1330	1324	1349	1337	836	859	865	892	891	917	924	932	914	902	916	885	877	975	817	862	885	941	940	897	950
282.937	1338	1331	1379	1401	1354	1358	1463	1359	1413	1346	1394	1364	1450	1354	1317	1308	1332	1363	1357	1383	1405	1396	1393	1387	1343	1319	1347	1334	851	847	869	898	892	912	923	928	909	913	911	877	880	984	819	856	899	941	948	903	952
283.937	1331	1331	1382	1404	1348	1355	1457	1353	1417	1350	1391	1369	1443	1357	1321	1302	1335	1357	1356	1364	1377	1393	1388	1388	1338	1333	1346	1328	843	848	864	882	908	912	923	936	918	902	897	880	887	978	827	869	888	929	947	896	943
284.937	1330	1329	1382	1404	1351	1353	1452	1366	1413	1352	1391	1361	1445	1354	1307	1305	1344	1361	1350	1384	1387	1400	1411	1381	1339	1327	1353	1336	841	854	865	889	896	917	918	928	914	905	907	876	874	985	834	857	879	942	942	906	952
285.937	1328	1327	1377	1407	1346	1351	1451	1368	1423	1355	1389	1367	1451	1366	1313	1333	1334	1359	1357	1385	1392	1395	1398	1375	1337	1323	1342	1329	844	850	861	895	894	916	928	934	921	912	902	876	880	978	830	861	893	940	953	902	953
286.937	1330	1336	1364	1405	1352	1353	1458	1354	1418	1352	1382	1357	1446	1359	1321	1315	1343	1361	1370	1373	1392	1399	1405	1389	1336	1337	1335	1334	841	847	867	899	893	911	928	938	914	900	897	878	882	970	825	875	889	938	937	892	948
287.937	1338	1350	1383	1397	1351	1353	1450	1367	1421	1346	1387	1364	1437	1346	1317	1314	1334	1356	1356	1375	1404	1387	1398	1376	1339	1325	1350	1332	845	848	874	894	884	912	914	933	912	894	911	885	884	980	825	865	889	935	948	890	942
288.937	1324	1337	1377	1400	1352	1349	1446	1358	1417	1355	1387	1355	1446	1359	1321	1324	1331	1351	1352	1379	1394	1402	1399	1382	1329	1312	1349	1331	838	843	869	893	897	913	924	934	912	906	891	877	886	983	829	868	895	937	951	891	952
289.937	1339	1332	1378	1410	1349	1361	1448	1352	1408	1359	1386	1349	1449	1354	1317	1312	1334	1363	1359	1378	1392	1401	1401	1374	1337	1323	1344	1337	847	844	859	894	904	912	924	933	922	905	904	877	872	978	831	869	886	936	942	899	947
290.937	1325	1321	1379	1401	1342	1347	1444	1362	1417	1348	1388	1359	1446	1354	1313	1305	1340	1356	1357	1382	1402	1389	1403	1372	1331	1322	1342	1333	845	854	862	890	891	915	916	935	917	906	902	876	880	979	829	863	890	934	948	895	950
291.937	1327	1334	1383	1399	1346	1345	1444	1360	1407	1358	1386	1361	1438	1353	1316	1309	1335	1351	1352	1372	1397	1394	1407	1378	1332	1324	1355	1332	845	855	861	899	895	913	918	937	920	899	903	868	883	973	831	862	892	943	947	901	945
292.937	1330	1325	1377	1407	1348	1348	1456	1353	1417	1343	1382	1358	1447	1356	1316	1304	1337	1347	1355	1369	1386	1399	1399	1380	1337	1334	1354	1331	841	849	861	895	890	910	921	945	916	896	898	876	878	976	820	862	895	937	942	890	955
293.937	1331	1329	1369	1396	1346	1352	1448	1355	1424	1344	1386	1366	1443	1349	1313	1310	1323	1350	1357	1373	1384	1384	1405	1368	1333	1320	1341	1308	844	847	854	894	890	903	917	935	913	900	893	878	865	983	822	863	893	931	944	903	946
294.937	1335	1328	1379	1390	1347	1346	1449	1358	1413	1350	1392	1343	1437	1345	1308	1299	1331	1344	1358	1380	1384	1404	1401	1383	1338	1313	1352	1331	836	846	865	893	883	905	925	931	911	896	900	870	875	967	828	867	886	938	942	901	948
295.937	1331	1321	1378	1389	1349	1358	1443	1346	1418	1361	1391	1350	1441	1344	1316	1305	1337	1361	1355	1379	1383	1400	1385	1380	1343	1320	1340	1323	846	843	864	892	894	908	920	921	917	906	915	882	886	970	829	857	894	939	945	893	945
296.937	1327	1338	1372	1390	1348	1349	1446	1352	1410	1358	1392	1352	1447	1349	1311	1314	1335	1353	1351	1369	1389	1385	1399	1370	1319	1326	1334	1327	847	850	862	889	896	905	922	930	911	898	902	885	882	972	828	861	895	937	949	896	953
297.937	1314	1320	1375	1392	1342	1354	1452	1356	1419	1348	1376	1367	1445	1340	1305	1310	1325	1350	1352	1359	1385	1396	1393	1368	1322	1331	1344	1326	836	847	858	892	890	903	920	932	907	898	900	878	870	976	827	853	887	932	943	889	942
[truncated: 63 more columns]

## Sheet: Figure 1C
Data are absolute fluorescence values from individual 384-wells (in a.u.). Each well represents a siRNA pool targeting one gene. For Fig. 1C, curves were normalized to the first value in each dataset (= 100%)
	Candidate Gene ->	LIN37	BTBD16	C2orf78	CD3EAP	SCG5	KRT75	SYNC	BHLHA15	C9orf131	SHROOM3	GNL3	C12orf29	TMEM159	C8orf74	TRMT44	DGAT2L6	MAB21L3	EFCC1	CCDC85A	ECHDC2	ANO9	WDR66	CCDC110	SHROOM1	DNAJC17	ZNF416	TNFAIP8L1	LELP1	EIF3M	CHAC1	TROVE2	PRAMEF12	NUP62CL	CEP55	NDUFAF6	TTC21B	LRP5L	WASHC3	BORA	INAVA	ERICH1	TPRG1L	CARS2	LIMA1	CD70	DYNLT3	AFF2	WLS
Time	Well number ->	B2	C2	D2	E2	F2	G2	H2	I2	J2	K2	L2	M2	N2	O2	B3	C3	D3	E3	F3	G3	H3	I3	J3	K3	L3	M3	N3	O3	B4	C4	D4	E4	F4	G4	H4	I4	J4	K4	L4	M4	N4	O4	B5	C5	D5	E5	F5	G5
0		4206	4127	4264	3622	4004	3778	4311	4571	4517	3836	3990	4272	4135	3950	3853	3592	3703	3998	4430	4313	4158	4723	4495	4138	4029	4486	4428	4125	2855	3310	4050	4571	4614	3966	4461	4602	3625	3979	4088	4415	4136	4107	4935	3822	3937	3931	4014	4319
1		4221	4129	4294	3637	3988	3765	4342	4580	4552	3849	4007	4270	4138	3965	3858	3592	3711	3995	4470	4322	4180	4727	4494	4166	4006	4483	4444	4123	2870	3301	4081	4586	4596	3994	4465	4633	3645	4003	4120	4440	4170	4123	4941	3854	3937	3936	4036	4331
2		4225	4151	4287	3629	3981	3778	4342	4581	4527	3839	4005	4287	4128	3994	3848	3593	3699	4018	4455	4316	4153	4738	4514	4154	4010	4491	4439	4128	2861	3288	4050	4564	4610	3976	4472	4631	3644	4003	4099	4438	4182	4110	4942	3817	3923	3950	4017	4336
3		4203	4156	4284	3644	4004	3758	4332	4575	4524	3843	4017	4283	4133	3971	3865	3571	3699	4012	4436	4319	4168	4721	4508	4145	4021	4472	4430	4075	2875	3313	4053	4565	4605	3963	4481	4591	3648	3990	4087	4417	4163	4104	4935	3817	3942	3940	4019	4329
4		4203	4146	4272	3619	4009	3774	4313	4585	4520	3851	3988	4277	4116	3950	3839	3565	3709	3980	4412	4355	4156	4726	4514	4141	3997	4459	4419	4104	2850	3287	4044	4601	4596	3963	4443	4602	3647	3982	4115	4404	4166	4105	4935	3803	3937	3922	4040	4308
5		4210	4125	4274	3607	3991	3783	4318	4585	4507	3838	4000	4295	4105	3934	3845	3574	3695	4004	4439	4324	4138	4747	4513	4138	3976	4474	4437	4091	2861	3301	4051	4546	4614	3969	4481	4592	3624	3979	4087	4414	4132	4115	4928	3818	3927	3911	4023	4308
6		4208	4122	4264	3620	3994	3753	4334	4576	4508	3814	3988	4253	4123	3925	3812	3549	3697	3980	4417	4299	4150	4693	4492	4139	3977	4456	4413	4091	2845	3288	4059	4529	4587	3969	4446	4602	3653	3979	4088	4418	4157	4077	4903	3802	3913	3895	3984	4307
7		4205	4147	4259	3610	3974	3742	4318	4538	4487	3816	3980	4275	4096	3930	3809	3557	3689	3973	4399	4299	4173	4693	4480	4104	4013	4471	4413	4098	2839	3271	4037	4548	4581	3943	4452	4595	3618	3973	4088	4400	4132	4090	4887	3796	3919	3899	4009	4299
7.73		4199	4124	4267	3615	3979	3760	4308	4553	4503	3821	3995	4253	4120	3948	3842	3568	3684	3980	4409	4315	4149	4700	4491	4144	3986	4453	4417	4077	2831	3275	4032	4532	4610	3942	4463	4592	3610	3965	4094	4407	4145	4105	4930	3809	3928	3911	4022	4297
8.73		4184	4112	4246	3602	3996	3751	4288	4551	4498	3829	3992	4268	4113	3923	3832	3552	3691	3966	4406	4278	4141	4697	4477	4105	3976	4444	4422	4082	2864	3265	4027	4525	4580	3942	4443	4570	3597	3961	4072	4414	4119	4085	4913	3776	3885	3916	3993	4292
9.48		4181	4105	4266	3598	3979	3732	4300	4543	4527	3833	3973	4272	4098	3958	3829	3565	3686	3978	4397	4275	4143	4708	4465	4126	3976	4463	4416	4058	2872	3272	4046	4511	4581	3956	4439	4585	3600	3970	4083	4378	4126	4070	4913	3791	3904	3910	3990	4268
10.48		4184	4105	4266	3598	3979	3748	4308	4560	4503	3829	3997	4262	4091	3932	3827	3550	3684	3980	4421	4279	4150	4706	4503	4126	3997	4462	4413	4096	2850	3284	4026	4560	4589	3945	4461	4598	3628	3973	4096	4415	4143	4067	4891	3813	3925	3928	4001	4289
11.48		4203	4117	4254	3612	3961	3769	4313	4553	4505	3838	3987	4278	4116	3918	3837	3573	3686	3975	4414	4313	4138	4700	4497	4141	4003	4448	4419	4072	2853	3306	4047	4548	4614	3960	4486	4607	3627	3970	4116	4381	4169	4073	4917	3818	3913	3924	4016	4312
12.48		4208	4154	4282	3647	4011	3784	4326	4573	4525	3833	4002	4287	4133	3944	3860	3592	3708	3999	4443	4333	4180	4709	4492	4144	4006	4474	4416	4091	2861	3325	4063	4564	4624	3970	4483	4633	3651	4002	4121	4421	4150	4098	4923	3834	3954	3947	4031	4320
13.48		5018	5169	5285	4412	4900	4790	5127	5444	5283	4794	4735	4987	4945	4806	4870	4750	4862	4877	5317	5195	5113	5685	5390	4962	5014	5276	5255	5071	3872	4832	5082	5548	5614	5040	5440	5940	4425	4816	5100	5338	5166	4989	6038	4911	5070	5077	4935	5336
14.48		4548	4716	4732	3932	4334	4195	4639	4908	4909	4357	4456	4761	4728	4605	4376	4112	4347	4366	4809	4658	4561	5187	4995	4589	4450	5081	4998	4806	3428	4024	4511	4942	5017	4397	4941	5113	4075	4436	4657	5034	4813	4789	5368	4331	4384	4418	4476	4733
15.48		4216	4239	4327	3637	4034	3854	4353	4661	4641	3947	4095	4456	4403	4207	4002	3683	3900	4007	4443	4361	4242	4838	4697	4244	4089	4691	4650	4362	3065	3518	4107	4604	4623	4029	4570	4708	3797	4127	4293	4629	4344	4426	4962	3867	4022	4064	4183	4266
16.48		4095	4093	4237	3588	3926	3715	4274	4526	4485	3775	3958	4258	4143	3927	3874	3577	3699	3938	4344	4233	4177	4715	4503	4056	3940	4427	4425	4050	2958	3301	4016	4510	4531	3928	4452	4558	3624	3945	4077	4415	4105	4115	4834	3745	3935	3943	4053	4168
17.48		4036	4046	4130	3523	3880	3663	4149	4416	4399	3732	3885	4134	3972	3796	3821	3500	3619	3884	4265	4190	4085	4643	4387	3991	3830	4298	4265	3901	2881	3287	3961	4456	4490	3887	4390	4486	3543	3867	3986	4304	4005	3974	4756	3661	3866	3830	3977	4096
18.48		3947	3893	4043	3421	3787	3581	4037	4283	4274	3652	3716	4036	3878	3669	3707	3386	3516	3776	4189	4100	4015	4527	4253	3902	3627	4205	4107	3817	2838	3149	3886	4358	4387	3786	4302	4277	3441	3708	3812	4172	3884	3833	4643	3577	3691	3625	3860	3980
19.48		3718	3618	3801	3226	3559	3354	3770	4032	4067	3482	3594	3831	3625	3462	3456	3165	3256	3561	3923	3877	3762	4236	4026	3704	3473	3944	3839	3554	2583	2948	3625	4121	4152	3536	4041	4083	3253	3580	3620	3917	3614	3632	4312	3302	3532	3416	3653	3744
20.48		3598	3462	3681	3127	3443	3208	3600	3865	3928	3386	3486	3696	3516	3331	3337	3034	3123	3453	3813	3755	3672	4088	3881	3604	3322	3789	3708	3431	2474	2855	3489	3980	3988	3382	3921	3929	3171	3461	3484	3797	3451	3490	4121	3163	3429	3290	3520	3581
21.48		3418	3294	3530	2991	3301	3050	3419	3693	3769	3265	3375	3573	3379	3211	3180	2884	2959	3315	3620	3592	3524	3898	3711	3466	3186	3643	3534	3248	2379	2740	3333	3836	3841	3258	3758	3758	3039	3322	3320	3609	3289	3346	3920	3003	3269	3147	3340	3415
22.48		3316	3139	3372	2892	3205	2938	3255	3517	3635	3156	3260	3451	3203	3063	3081	2750	2839	3124	3479	3457	3389	3719	3558	3348	3016	3475	3368	3100	2279	2634	3170	3675	3689	3098	3589	3599	2926	3204	3187	3454	3099	3161	3705	2871	3141	2994	3199	3256
23.48		3160	2988	3236	2784	3060	2827	3083	3345	3468	3063	3138	3321	3073	2909	2954	2629	2719	3026	3318	3288	3252	3553	3365	3223	2909	3326	3224	2971	2188	2535	3038	3539	3523	2953	3436	3446	2812	3056	3052	3314	2948	3012	3494	2733	3011	2861	3068	3097
24.48		3017	2818	3086	2702	2927	2736	2938	3189	3332	2965	3020	3182	2934	2798	2818	2521	2572	2887	3179	3132	3133	3400	3223	3111	2764	3182	3060	2822	2113	2441	2904	3365	3390	2828	3284	3293	2703	2953	2903	3155	2789	2877	3313	2627	2861	2744	2929	2949
25.48		2883	2701	2937	2570	2826	2613	2787	3019	3193	2844	2888	3059	2772	2655	2711	2436	2460	2752	3018	2992	2998	3221	3069	3000	2631	3012	2879	2667	2046	2351	2756	3216	3248	2668	3130	3132	2577	2856	2774	3000	2629	2723	3123	2485	2746	2586	2778	2814
26.48		2759	2571	2794	2470	2706	2495	2644	2870	3028	2737	2778	2910	2629	2567	2592	2319	2359	2642	2880	2832	2873	3052	2922	2871	2513	2869	2741	2541	1976	2268	2642	3064	3095	2557	2966	2976	2475	2711	2663	2831	2502	2593	2960	2361	2638	2462	2651	2667
27.48		2638	2450	2683	2388	2593	2407	2513	2745	2901	2631	2649	2775	2502	2436	2486	2226	2270	2502	2749	2693	2754	2928	2781	2760	2386	2742	2614	2412	1915	2174	2514	2919	2929	2445	2834	2819	2358	2618	2528	2691	2385	2471	2792	2266	2503	2348	2534	2557
28.48		2525	2343	2566	2294	2497	2296	2410	2636	2766	2548	2552	2654	2421	2349	2391	2128	2150	2403	2648	2566	2655	2798	2634	2648	2291	2620	2475	2308	1845	2113	2411	2779	2799	2335	2693	2681	2273	2511	2427	2569	2281	2354	2639	2167	2410	2239	2408	2431
29.48		2408	2255	2464	2209	2394	2227	2301	2511	2646	2459	2452	2525	2297	2266	2302	2059	2084	2312	2522	2448	2545	2677	2527	2550	2198	2512	2363	2225	1789	2030	2300	2651	2683	2231	2564	2561	2173	2403	2298	2453	2182	2257	2512	2088	2282	2144	2300	2343
30.48		2326	2162	2367	2145	2304	2152	2202	2412	2530	2356	2357	2411	2201	2178	2210	1977	2022	2236	2421	2356	2437	2555	2407	2452	2101	2382	2265	2151	1723	1964	2192	2539	2566	2141	2461	2453	2070	2305	2215	2356	2093	2162	2369	1989	2194	2064	2200	2241
31.48		2241	2104	2261	2073	2211	2078	2124	2322	2431	2271	2286	2334	2116	2104	2140	1924	1938	2154	2311	2255	2351	2470	2317	2359	2037	2280	2183	2062	1698	1913	2117	2432	2455	2064	2351	2370	2013	2222	2124	2247	2017	2086	2278	1926	2120	1982	2120	2153
32.48		2167	2017	2195	2022	2141	2003	2035	2227	2348	2197	2198	2230	2052	2042	2056	1872	1869	2081	2235	2178	2264	2358	2245	2287	1958	2213	2098	1998	1650	1864	2029	2339	2346	1995	2239	2267	1945	2151	2035	2164	1939	2004	2172	1879	2026	1922	2031	2068
33.48		2096	1961	2130	1974	2089	1955	1985	2142	2262	2116	2145	2152	1990	1982	1984	1820	1824	2001	2156	2100	2195	2270	2156	2196	1910	2122	2025	1942	1619	1813	1978	2230	2272	1919	2158	2195	1892	2060	1971	2087	1868	1933	2097	1806	1962	1854	1962	2011
34.48		2048	1899	2068	1918	2030	1900	1926	2082	2188	2063	2086	2080	1938	1920	1933	1767	1777	1938	2081	2017	2109	2193	2090	2139	1869	2057	1973	1892	1594	1777	1925	2171	2173	1857	2080	2127	1845	2007	1916	2016	1816	1887	2015	1782	1903	1804	1873	1924
35.48		1985	1860	2005	1878	1975	1849	1856	2029	2116	2025	2008	2023	1873	1858	1868	1737	1732	1895	2011	1961	2050	2120	2030	2057	1804	1993	1914	1852	1561	1730	1858	2096	2103	1808	2011	2063	1782	1943	1852	1948	1735	1826	1958	1731	1838	1760	1828	1887
36.48		1916	1819	1963	1841	1930	1810	1817	1981	2054	1967	1964	1964	1819	1833	1837	1692	1691	1829	1959	1894	1995	2075	1967	2004	1766	1946	1847	1796	1527	1690	1821	2030	2043	1763	1959	1996	1741	1897	1807	1892	1702	1789	1876	1680	1791	1726	1781	1834
37.48		1886	1780	1910	1806	1883	1770	1786	1919	2015	1909	1916	1907	1799	1779	1790	1659	1676	1798	1904	1870	1939	2014	1920	1958	1730	1905	1799	1761	1508	1656	1771	1966	1967	1731	1897	1941	1704	1844	1758	1840	1666	1742	1847	1635	1731	1682	1729	1788
38.48		1851	1720	1865	1766	1855	1751	1734	1886	1949	1877	1864	1865	1734	1740	1756	1631	1646	1740	1853	1814	1904	1973	1865	1909	1695	1855	1754	1724	1488	1629	1722	1916	1914	1703	1853	1887	1675	1799	1728	1797	1630	1693	1796	1614	1720	1643	1707	1745
39.48		1795	1707	1834	1725	1817	1703	1700	1824	1927	1838	1837	1830	1712	1699	1704	1594	1616	1713	1809	1790	1862	1923	1822	1874	1660	1812	1733	1680	1470	1607	1686	1876	1873	1661	1814	1854	1658	1770	1673	1769	1611	1670	1763	1589	1669	1616	1648	1719
40.48		1777	1671	1801	1710	1777	1681	1674	1808	1870	1811	1792	1783	1677	1673	1668	1576	1584	1685	1773	1738	1797	1869	1799	1822	1633	1774	1681	1641	1435	1563	1658	1816	1833	1627	1761	1820	1604	1732	1642	1724	1572	1648	1707	1549	1654	1581	1626	1675
41.48		1727	1644	1754	1682	1754	1640	1642	1773	1826	1758	1760	1750	1643	1655	1648	1546	1557	1657	1743	1710	1781	1849	1750	1786	1604	1737	1658	1620	1428	1543	1624	1782	1781	1600	1726	1768	1582	1698	1634	1676	1550	1593	1695	1529	1609	1568	1581	1648
42.48		1688	1624	1736	1661	1715	1607	1630	1739	1794	1737	1730	1720	1628	1616	1619	1530	1546	1624	1714	1664	1745	1803	1724	1767	1567	1709	1627	1601	1400	1528	1601	1734	1744	1571	1699	1736	1554	1671	1587	1637	1511	1590	1649	1510	1584	1532	1561	1623
43.48		1665	1590	1682	1633	1687	1602	1604	1704	1756	1699	1687	1686	1579	1593	1570	1492	1510	1594	1660	1648	1707	1760	1688	1732	1540	1671	1604	1574	1408	1499	1558	1711	1700	1551	1671	1703	1536	1641	1566	1621	1504	1549	1626	1482	1543	1516	1517	1598
44.48		1662	1581	1672	1614	1652	1574	1573	1694	1737	1684	1682	1656	1546	1549	1572	1497	1495	1582	1650	1615	1682	1734	1663	1690	1530	1642	1565	1558	1383	1489	1538	1687	1666	1509	1632	1659	1511	1618	1536	1591	1479	1527	1601	1456	1539	1490	1516	1569
45.48		1619	1544	1651	1588	1647	1553	1547	1659	1704	1657	1632	1628	1558	1546	1549	1471	1473	1562	1608	1579	1665	1706	1645	1658	1519	1604	1550	1536	1369	1473	1528	1653	1660	1499	1596	1638	1489	1594	1519	1574	1473	1511	1571	1432	1500	1474	1495	1553
46.48		1600	1529	1631	1573	1619	1538	1530	1654	1688	1631	1618	1606	1524	1526	1516	1446	1468	1548	1590	1571	1637	1694	1615	1649	1503	1589	1533	1512	1352	1463	1511	1619	1614	1489	1573	1619	1468	1567	1500	1544	1451	1486	1557	1434	1493	1447	1460	1524
47.48		1587	1532	1609	1557	1597	1523	1507	1619	1660	1603	1603	1577	1516	1519	1498	1443	1449	1516	1571	1541	1629	1656	1599	1616	1464	1571	1517	1500	1357	1424	1487	1589	1592	1471	1547	1602	1458	1546	1479	1528	1427	1473	1530	1412	1472	1434	1443	1513
48.48		1563	1496	1574	1520	1579	1501	1499	1611	1624	1591	1588	1557	1497	1501	1495	1432	1440	1498	1559	1522	1585	1647	1563	1593	1460	1538	1491	1486	1325	1406	1460	1549	1572	1447	1536	1586	1445	1529	1451	1507	1417	1452	1515	1388	1445	1422	1435	1500
49.48		1563	1486	1560	1517	1566	1492	1486	1584	1609	1578	1563	1532	1474	1484	1477	1408	1417	1481	1544	1514	1578	1626	1554	1594	1440	1536	1485	1461	1325	1400	1451	1543	1539	1435	1519	1568	1432	1520	1451	1495	1412	1424	1487	1375	1442	1395	1408	1480
50.48		1532	1476	1544	1514	1556	1487	1470	1586	1601	1555	1550	1532	1459	1473	1448	1403	1413	1473	1523	1498	1557	1594	1532	1559	1427	1519	1461	1453	1332	1382	1430	1531	1529	1418	1502	1534	1404	1496	1433	1475	1384	1427	1480	1366	1419	1396	1394	1464
51.48		1524	1474	1535	1497	1528	1460	1458	1571	1587	1532	1538	1520	1437	1452	1451	1394	1417	1459	1507	1479	1543	1594	1517	1535	1419	1504	1444	1433	1310	1376	1423	1506	1502	1408	1471	1519	1412	1472	1411	1462	1376	1421	1467	1369	1415	1382	1390	1442
52.48		1519	1457	1517	1502	1519	1440	1439	1539	1567	1517	1505	1500	1440	1454	1428	1385	1395	1456	1500	1459	1524	1572	1506	1525	1404	1492	1427	1433	1302	1376	1412	1499	1476	1394	1473	1510	1394	1472	1407	1458	1369	1411	1455	1348	1396	1386	1366	1434
53.48		1498	1430	1507	1482	1511	1434	1427	1543	1547	1507	1503	1485	1420	1436	1423	1372	1387	1444	1464	1458	1506	1558	1507	1516	1394	1472	1413	1421	1294	1351	1395	1477	1468	1394	1448	1495	1388	1447	1375	1442	1350	1395	1445	1350	1375	1364	1362	1425
54.48		1500	1435	1489	1467	1493	1417	1427	1524	1539	1505	1481	1470	1408	1438	1409	1361	1378	1427	1467	1437	1483	1547	1485	1492	1373	1459	1403	1419	1296	1347	1375	1458	1456	1380	1433	1479	1371	1431	1373	1429	1340	1376	1426	1340	1366	1350	1348	1411
55.48		1474	1410	1480	1455	1471	1414	1416	1506	1520	1479	1471	1465	1398	1406	1404	1348	1364	1420	1459	1431	1474	1531	1471	1483	1384	1453	1393	1393	1296	1331	1366	1461	1451	1367	1421	1458	1352	1421	1365	1416	1330	1367	1412	1317	1362	1345	1331	1390
56.48		1450	1405	1475	1450	1471	1396	1408	1508	1513	1472	1476	1450	1378	1401	1376	1325	1364	1398	1434	1410	1476	1496	1449	1477	1376	1431	1392	1392	1277	1331	1369	1445	1428	1352	1408	1453	1351	1420	1358	1402	1319	1357	1409	1317	1350	1343	1333	1401
57.22		1461	1412	1469	1432	1456	1389	1403	1499	1512	1467	1458	1447	1385	1401	1383	1343	1351	1410	1443	1407	1464	1505	1437	1467	1364	1427	1376	1389	1272	1318	1365	1425	1424	1348	1399	1451	1349	1414	1339	1396	1320	1377	1402	1324	1344	1338	1318	1381
58.23		1459	1389	1462	1430	1465	1396	1383	1494	1508	1470	1453	1427	1378	1395	1379	1323	1351	1400	1419	1403	1454	1484	1427	1439	1351	1407	1375	1376	1266	1322	1345	1425	1413	1343	1396	1437	1342	1410	1337	1381	1305	1339	1382	1304	1337	1329	1317	1373
58.97		1441	1383	1440	1425	1460	1388	1374	1489	1485	1437	1451	1433	1378	1387	1368	1325	1346	1409	1418	1394	1442	1499	1433	1448	1348	1407	1372	1371	1279	1318	1339	1420	1408	1341	1379	1420	1338	1397	1332	1366	1306	1337	1379	1304	1324	1327	1313	1364
59.97		1448	1389	1444	1411	1440	1380	1369	1471	1469	1434	1438	1418	1353	1365	1352	1318	1337	1389	1397	1395	1430	1456	1421	1449	1340	1401	1353	1363	1261	1306	1334	1397	1381	1335	1368	1411	1325	1388	1325	1373	1298	1326	1367	1296	1317	1305	1307	1360
60.97		1433	1372	1425	1400	1428	1366	1369	1449	1464	1424	1420	1401	1348	1374	1348	1309	1334	1387	1397	1375	1418	1461	1415	1433	1327	1389	1359	1358	1266	1284	1344	1384	1389	1329	1361	1410	1324	1369	1304	1365	1302	1330	1371	1278	1317	1307	1299	1349
61.97		1431	1366	1415	1383	1410	1363	1356	1449	1471	1417	1415	1393	1361	1380	1345	1313	1318	1375	1385	1366	1408	1452	1394	1418	1336	1395	1342	1352	1258	1306	1321	1389	1357	1315	1357	1384	1319	1374	1304	1342	1292	1311	1344	1290	1301	1306	1291	1349
62.97		1428	1367	1412	1391	1425	1366	1357	1456	1446	1406	1411	1395	1341	1362	1337	1293	1325	1357	1381	1375	1400	1435	1396	1417	1318	1381	1331	1349	1257	1283	1312	1366	1367	1315	1349	1378	1308	1360	1297	1339	1282	1323	1354	1278	1296	1291	1281	1339
63.97		1415	1364	1407	1383	1403	1353	1361	1433	1437	1406	1391	1390	1346	1364	1334	1293	1318	1363	1379	1360	1390	1423	1376	1414	1313	1369	1328	1345	1244	1273	1293	1363	1360	1305	1333	1378	1292	1350	1283	1346	1285	1314	1350	1278	1300	1285	1271	1331
64.97		1411	1344	1407	1376	1405	1342	1349	1431	1449	1394	1400	1380	1333	1335	1324	1302	1300	1343	1360	1338	1402	1431	1369	1406	1310	1355	1330	1328	1246	1280	1298	1363	1350	1298	1338	1378	1297	1356	1288	1323	1284	1292	1334	1263	1278	1275	1262	1323
65.97		1400	1322	1385	1366	1391	1335	1348	1434	1422	1383	1398	1378	1330	1339	1313	1282	1297	1338	1363	1345	1378	1399	1370	1374	1319	1371	1328	1333	1246	1262	1290	1359	1345	1296	1316	1364	1284	1340	1289	1318	1267	1290	1325	1259	1288	1287	1261	1321
66.97		1398	1328	1380	1373	1400	1339	1338	1428	1421	1376	1386	1375	1326	1341	1306	1283	1311	1335	1352	1326	1361	1403	1363	1375	1300	1340	1310	1331	1240	1261	1281	1338	1334	1296	1327	1367	1278	1347	1279	1332	1271	1293	1330	1262	1288	1273	1266	1327
67.97		1385	1333	1375	1364	1385	1322	1331	1414	1416	1381	1385	1373	1316	1327	1324	1274	1307	1352	1351	1344	1366	1406	1367	1382	1294	1343	1317	1328	1238	1257	1288	1342	1329	1296	1309	1355	1277	1340	1283	1313	1261	1290	1318	1264	1274	1270	1264	1317
68.97		1378	1328	1363	1359	1380	1314	1327	1399	1404	1374	1375	1358	1318	1318	1298	1272	1284	1329	1358	1308	1358	1393	1364	1378	1290	1345	1308	1329	1241	1251	1274	1325	1320	1286	1312	1352	1284	1320	1274	1315	1258	1298	1308	1255	1266	1265	1251	1300
69.97		1368	1323	1372	1343	1368	1326	1335	1408	1411	1356	1368	1353	1308	1318	1285	1271	1301	1321	1338	1305	1363	1390	1363	1362	1294	1331	1293	1318	1240	1246	1288	1323	1306	1273	1298	1347	1262	1323	1274	1319	1254	1277	1304	1248	1262	1257	1248	1300
70.97		1383	1316	1373	1346	1356	1309	1320	1421	1397	1351	1373	1348	1303	1312	1286	1268	1289	1312	1333	1305	1364	1390	1350	1363	1282	1319	1296	1302	1224	1244	1268	1321	1307	1284	1300	1337	1271	1313	1256	1299	1253	1277	1311	1251	1265	1259	1239	1298
71.97		1385	1306	1355	1336	1360	1321	1323	1404	1382	1373	1361	1348	1319	1316	1293	1271	1297	1312	1329	1320	1352	1379	1344	1351	1276	1333	1297	1310	1235	1238	1268	1316	1297	1272	1289	1329	1264	1316	1261	1295	1241	1264	1304	1244	1256	1259	1239	1299
72.97		1370	1313	1347	1338	1355	1312	1307	1386	1384	1348	1341	1333	1286	1300	1301	1260	1276	1312	1326	1312	1336	1375	1335	1351	1278	1325	1291	1291	1232	1242	1267	1321	1300	1270	1291	1316	1265	1298	1263	1290	1227	1268	1296	1241	1260	1251	1235	1303
73.97		1379	1305	1340	1343	1353	1290	1301	1393	1394	1363	1344	1345	1293	1298	1280	1261	1276	1312	1315	1299	1327	1388	1338	1350	1273	1311	1288	1298	1222	1223	1253	1311	1289	1262	1289	1322	1254	1292	1260	1292	1234	1262	1289	1235	1249	1249	1239	1275
74.97		1352	1320	1332	1327	1348	1299	1301	1388	1384	1338	1348	1323	1283	1296	1270	1241	1273	1308	1306	1303	1324	1361	1333	1345	1278	1304	1282	1293	1221	1233	1256	1298	1288	1256	1276	1311	1258	1290	1236	1283	1234	1261	1288	1233	1239	1239	1234	1280
75.97		1359	1288	1337	1329	1343	1293	1297	1388	1387	1351	1336	1333	1289	1298	1259	1250	1282	1295	1312	1306	1325	1371	1338	1338	1263	1301	1286	1290	1208	1204	1254	1296	1270	1251	1280	1300	1258	1295	1254	1280	1237	1265	1279	1231	1237	1231	1222	1282
76.97		1352	1288	1332	1327	1333	1290	1294	1371	1380	1343	1348	1333	1283	1291	1260	1244	1264	1300	1303	1290	1313	1364	1314	1338	1275	1307	1282	1286	1208	1214	1242	1289	1286	1245	1272	1308	1252	1295	1229	1280	1227	1252	1282	1227	1234	1237	1230	1276
77.97		1342	1286	1328	1331	1341	1299	1292	1381	1374	1316	1339	1318	1281	1279	1269	1246	1267	1306	1298	1281	1321	1349	1324	1325	1258	1292	1257	1285	1210	1219	1247	1289	1270	1239	1268	1304	1242	1292	1233	1283	1228	1252	1269	1224	1235	1239	1221	1279
78.97		1350	1281	1325	1311	1333	1288	1288	1368	1358	1325	1344	1314	1271	1281	1259	1244	1261	1289	1300	1289	1319	1346	1320	1328	1264	1290	1263	1294	1207	1219	1225	1280	1268	1248	1271	1300	1234	1282	1232	1269	1219	1259	1275	1222	1222	1226	1205	1278
79.97		1326	1296	1323	1322	1333	1280	1294	1373	1360	1313	1331	1308	1273	1277	1257	1233	1268	1289	1286	1280	1304	1346	1310	1319	1260	1290	1258	1274	1207	1198	1236	1274	1265	1242	1264	1292	1237	1278	1221	1266	1216	1243	1270	1219	1230	1231	1221	1267
80.97		1340	1283	1327	1317	1322	1265	1279	1368	1368	1311	1319	1314	1269	1284	1249	1235	1270	1292	1284	1277	1309	1347	1298	1322	1264	1293	1249	1286	1194	1206	1232	1278	1271	1239	1267	1287	1235	1268	1227	1276	1209	1242	1267	1217	1223	1223	1205	1262
81.97		1337	1274	1307	1314	1325	1281	1279	1353	1347	1310	1314	1299	1271	1291	1246	1235	1240	1295	1275	1274	1298	1324	1317	1311	1254	1284	1257	1280	1210	1207	1229	1278	1249	1238	1253	1298	1238	1269	1231	1263	1219	1236	1276	1215	1230	1222	1212	1256
82.97		1327	1289	1320	1304	1318	1272	1273	1353	1347	1291	1323	1306	1262	1263	1229	1211	1253	1289	1290	1281	1288	1341	1296	1292	1246	1266	1255	1272	1215	1209	1229	1267	1260	1235	1256	1278	1235	1265	1224	1255	1210	1243	1256	1206	1231	1222	1201	1255
83.97		1329	1272	1310	1296	1325	1267	1273	1358	1353	1318	1308	1301	1261	1266	1246	1219	1253	1282	1281	1266	1294	1323	1296	1301	1245	1272	1254	1258	1194	1206	1220	1262	1247	1232	1243	1282	1227	1269	1225	1252	1207	1230	1263	1206	1218	1213	1208	1246
84.97		1331	1260	1290	1299	1317	1273	1276	1353	1342	1286	1314	1289	1244	1265	1241	1223	1248	1256	1283	1263	1292	1323	1289	1306	1233	1273	1251	1258	1205	1201	1217	1253	1240	1238	1238	1279	1227	1255	1203	1252	1213	1232	1259	1205	1210	1219	1210	1247
85.97		1313	1272	1305	1294	1305	1262	1279	1346	1340	1298	1313	1274	1259	1277	1244	1217	1247	1280	1263	1263	1288	1328	1290	1289	1249	1278	1245	1254	1194	1200	1210	1253	1240	1228	1243	1282	1228	1249	1215	1255	1210	1227	1247	1211	1211	1215	1203	1255
86.97		1311	1266	1295	1284	1305	1252	1263	1351	1338	1293	1306	1293	1246	1268	1229	1220	1239	1268	1269	1259	1289	1323	1289	1288	1236	1263	1240	1264	1191	1200	1215	1259	1239	1228	1241	1274	1228	1259	1211	1240	1192	1218	1260	1206	1205	1205	1196	1249
87.97		1320	1262	1305	1275	1308	1242	1271	1341	1352	1295	1311	1291	1256	1272	1241	1211	1247	1271	1277	1254	1288	1317	1283	1285	1231	1257	1251	1246	1188	1193	1212	1255	1240	1227	1236	1272	1217	1262	1211	1249	1196	1230	1257	1201	1202	1213	1191	1249
88.97		1315	1264	1293	1284	1303	1252	1271	1349	1343	1291	1301	1288	1247	1252	1231	1219	1239	1259	1263	1257	1285	1320	1298	1291	1222	1260	1232	1250	1185	1197	1212	1266	1240	1220	1238	1268	1225	1248	1200	1247	1193	1221	1237	1200	1206	1210	1186	1238
89.97		1315	1250	1291	1279	1297	1263	1268	1341	1342	1278	1291	1281	1247	1249	1223	1211	1240	1254	1271	1253	1265	1317	1283	1286	1230	1261	1237	1251	1182	1181	1212	1250	1231	1224	1230	1276	1204	1252	1202	1237	1190	1226	1244	1189	1213	1206	1197	1241
90.97		1298	1252	1271	1279	1303	1240	1260	1329	1343	1300	1291	1284	1242	1252	1236	1211	1223	1259	1251	1253	1282	1294	1290	1289	1221	1251	1234	1253	1199	1191	1209	1235	1228	1223	1228	1259	1211	1255	1206	1244	1200	1220	1244	1198	1203	1211	1187	1241
91.97		1307	1252	1295	1291	1300	1262	1255	1343	1326	1285	1304	1284	1232	1259	1228	1201	1239	1262	1260	1244	1279	1311	1269	1270	1224	1245	1229	1250	1190	1182	1209	1253	1231	1216	1236	1261	1215	1239	1206	1237	1187	1214	1250	1184	1202	1198	1193	1245
92.97		1309	1245	1280	1270	1288	1254	1260	1341	1325	1285	1279	1269	1239	1259	1220	1211	1229	1257	1248	1237	1266	1305	1280	1276	1227	1251	1223	1235	1185	1177	1206	1244	1226	1217	1223	1257	1218	1234	1202	1239	1197	1223	1236	1197	1201	1196	1180	1238
93.97		1302	1250	1273	1262	1283	1245	1263	1341	1326	1280	1298	1278	1232	1242	1220	1203	1242	1260	1254	1241	1274	1299	1269	1279	1221	1255	1241	1243	1188	1182	1205	1231	1211	1224	1223	1263	1224	1241	1199	1237	1183	1214	1225	1191	1206	1196	1180	1237
94.97		1309	1254	1270	1279	1288	1244	1263	1316	1315	1285	1286	1271	1232	1252	1216	1212	1231	1260	1237	1241	1263	1311	1267	1266	1222	1252	1220	1243	1180	1174	1200	1244	1235	1214	1225	1243	1208	1239	1188	1236	1186	1217	1237	1190	1190	1196	1182	1229
95.97		1302	1243	1266	1272	1287	1250	1257	1321	1318	1265	1279	1262	1212	1249	1212	1197	1220	1242	1241	1246	1262	1288	1258	1266	1216	1242	1214	1245	1182	1166	1195	1224	1215	1211	1216	1254	1204	1222	1196	1234	1186	1202	1225	1184	1184	1194	1179	1226
96.97		1302	1237	1263	1269	1287	1237	1257	1314	1308	1270	1288	1259	1232	1240	1216	1201	1222	1259	1246	1232	1251	1293	1255	1276	1204	1254	1223	1248	1171	1178	1200	1228	1218	1211	1220	1246	1199	1229	1195	1220	1183	1207	1217	1184	1195	1184	1183	1223
97.97		1294	1262	1278	1267	1283	1244	1231	1314	1299	1258	1288	1271	1229	1236	1218	1197	1231	1251	1251	1238	1251	1293	1277	1271	1212	1243	1227	1230	1186	1175	1192	1221	1214	1200	1216	1242	1214	1220	1186	1239	1183	1209	1230	1193	1192	1190	1171	1223
98.97		1289	1238	1273	1257	1273	1229	1244	1321	1315	1278	1281	1262	1217	1238	1220	1171	1219	1243	1243	1226	1263	1297	1261	1264	1212	1231	1212	1230	1172	1158	1196	1219	1207	1203	1209	1243	1194	1227	1178	1223	1172	1205	1218	1184	1182	1180	1170	1213
99.97		1300	1240	1258	1262	1277	1245	1249	1314	1316	1268	1274	1262	1216	1238	1207	1201	1214	1248	1238	1235	1257	1290	1252	1255	1219	1252	1221	1240	1179	1175	1196	1224	1214	1210	1212	1235	1204	1229	1189	1217	1173	1209	1227	1186	1184	1180	1164	1218
100.97		1294	1238	1263	1264	1292	1239	1250	1311	1313	1265	1273	1254	1216	1228	1213	1200	1229	1251	1234	1225	1250	1290	1259	1254	1213	1231	1223	1230	1180	1180	1183	1220	1205	1206	1209	1231	1199	1235	1186	1216	1168	1208	1223	1182	1179	1181	1178	1215
101.97		1285	1218	1268	1275	1278	1232	1247	1313	1301	1257	1279	1259	1221	1235	1194	1197	1215	1248	1232	1220	1244	1291	1250	1245	1206	1226	1221	1234	1176	1175	1192	1231	1198	1201	1201	1230	1195	1222	1184	1207	1179	1195	1230	1189	1184	1192	1170	1225
102.97		1289	1232	1258	1260	1265	1219	1242	1313	1291	1260	1263	1259	1214	1231	1197	1195	1217	1240	1232	1217	1244	1287	1259	1243	1204	1223	1217	1232	1169	1156	1181	1221	1196	1200	1202	1245	1197	1224	1181	1204	1179	1190	1218	1180	1175	1190	1177	1207
103.97		1289	1227	1251	1245	1275	1239	1250	1298	1310	1240	1271	1247	1219	1226	1197	1187	1228	1243	1232	1229	1238	1282	1259	1254	1210	1232	1221	1227	1179	1180	1176	1221	1201	1193	1195	1227	1195	1227	1197	1212	1180	1201	1225	1189	1184	1177	1173	1225
104.97		1285	1228	1256	1252	1258	1219	1242	1304	1294	1253	1269	1264	1222	1236	1207	1186	1215	1246	1238	1217	1236	1268	1250	1242	1200	1232	1215	1232	1174	1152	1176	1209	1201	1190	1203	1232	1181	1217	1178	1213	1178	1189	1217	1187	1184	1177	1170	1207
105.97		1285	1233	1248	1257	1265	1236	1245	1308	1291	1253	1263	1256	1216	1228	1205	1197	1215	1236	1222	1235	1244	1273	1244	1242	1215	1229	1207	1213	1169	1156	1185	1217	1194	1192	1201	1230	1191	1214	1175	1219	1176	1199	1220	1180	1182	1177	1166	1219
106.97		1279	1223	1258	1267	1265	1224	1234	1303	1299	1262	1268	1247	1204	1226	1184	1181	1222	1248	1231	1226	1251	1265	1259	1246	1207	1220	1207	1222	1174	1161	1183	1212	1186	1200	1201	1220	1187	1217	1184	1212	1170	1183	1220	1173	1183	1177	1156	1217
107.97		1281	1225	1258	1247	1248	1231	1232	1303	1298	1252	1269	1254	1209	1222	1207	1175	1206	1226	1228	1225	1242	1273	1249	1240	1209	1231	1200	1234	1169	1158	1183	1219	1194	1201	1205	1217	1184	1220	1171	1214	1162	1195	1217	1175	1188	1176	1167	1215
108.97		1285	1221	1238	1252	1263	1226	1236	1299	1288	1250	1264	1262	1212	1221	1200	1181	1209	1234	1219	1232	1241	1274	1261	1243	1197	1226	1201	1214	1165	1159	1175	1209	1184	1185	1190	1228	1187	1208	1174	1214	1170	1186	1207	1165	1178	1180	1162	1209
109.97		1296	1232	1255	1245	1267	1214	1245	1311	1288	1245	1259	1256	1217	1226	1194	1182	1222	1234	1229	1205	1241	1274	1246	1236	1200	1223	1217	1213	1160	1155	1179	1198	1190	1183	1199	1230	1194	1200	1179	1200	1163	1187	1210	1172	1168	1169	1162	1198
110.97		1268	1228	1248	1255	1263	1222	1214	1293	1306	1248	1263	1242	1219	1235	1189	1187	1217	1231	1222	1220	1233	1281	1244	1237	1201	1231	1209	1214	1166	1150	1176	1203	1179	1190	1192	1215	1184	1218	1175	1203	1163	1186	1210	1178	1176	1165	1161	1194
111.97		1272	1223	1245	1255	1252	1213	1229	1283	1266	1240	1263	1241	1210	1222	1189	1181	1209	1228	1216	1207	1232	1262	1238	1232	1209	1213	1200	1213	1169	1143	1174	1210	1198	1182	1197	1217	1179	1214	1174	1209	1156	1190	1204	1172	1166	1161	1167	1207
112.97		1276	1223	1245	1249	1260	1218	1236	1293	1291	1243	1259	1237	1202	1212	1187	1175	1212	1223	1225	1226	1226	1261	1231	1233	1191	1216	1195	1210	1160	1149	1174	1206	1180	1180	1183	1223	1175	1204	1172	1203	1153	1182	1211	1168	1158	1180	1160	1200
113.97		1266	1218	1245	1240	1253	1211	1218	1296	1284	1243	1258	1246	1205	1208	1187	1178	1212	1223	1216	1210	1224	1258	1234	1237	1194	1214	1195	1216	1165	1145	1166	1195	1198	1189	1184	1208	1177	1210	1174	1204	1168	1177	1207	1155	1172	1170	1153	1203
114.97		1289	1228	1255	1247	1247	1213	1218	1281	1294	1243	1259	1231	1200	1217	1192	1186	1223	1228	1213	1214	1224	1250	1247	1236	1191	1217	1207	1210	1155	1145	1168	1196	1186	1183	1187	1221	1185	1198	1174	1200	1169	1179	1201	1171	1162	1164	1160	1206
115.97		1268	1218	1241	1244	1245	1226	1227	1288	1281	1238	1248	1229	1224	1212	1179	1173	1203	1223	1219	1214	1233	1258	1238	1227	1199	1211	1204	1218	1168	1146	1165	1206	1180	1187	1187	1215	1171	1201	1160	1186	1159	1187	1221	1164	1176	1174	1158	1200
116.97		1270	1211	1250	1245	1253	1216	1234	1291	1276	1243	1244	1236	1192	1219	1182	1175	1203	1220	1204	1205	1230	1265	1234	1227	1193	1211	1197	1222	1158	1148	1159	1189	1182	1179	1191	1234	1181	1204	1170	1193	1162	1177	1198	1162	1164	1169	1149	1205
117.97		1261	1230	1255	1237	1247	1213	1221	1289	1278	1217	1266	1231	1200	1217	1176	1175	1206	1211	1217	1203	1224	1255	1228	1232	1194	1202	1195	1210	1168	1136	1155	1189	1182	1176	1192	1209	1181	1205	1153	1200	1163	1179	1207	1165	1164	1168	1157	1194
118.97		1276	1220	1241	1242	1253	1214	1221	1286	1281	1230	1244	1232	1197	1206	1185	1176	1194	1226	1213	1207	1227	1256	1240	1221	1194	1202	1204	1211	1158	1149	1166	1209	1184	1187	1194	1206	1181	1197	1171	1189	1155	1179	1199	1171	1166	1172	1160	1196
119.97		1272	1216	1241	1232	1243	1211	1210	1288	1279	1235	1264	1231	1204	1226	1182	1173	1217	1223	1211	1213	1215	1258	1229	1233	1190	1207	1189	1208	1155	1137	1169	1205	1173	1180	1181	1213	1175	1197	1164	1194	1152	1186	1199	1161	1162	1166	1165	1194
120.97		1272	1208	1241	1242	1247	1208	1234	1289	1286	1240	1273	1234	1205	1212	1192	1170	1200	1220	1219	1205	1217	1259	1238	1232	1188	1202	1201	1214	1149	1161	1175	1192	1187	1183	1186	1209	1175	1190	1171	1204	1161	1174	1197	1167	1160	1165	1148	1192
121.97		1261	1216	1226	1225	1245	1214	1221	1271	1274	1235	1263	1237	1205	1221	1189	1167	1201	1217	1205	1200	1224	1267	1235	1229	1179	1205	1189	1219	1154	1153	1166	1188	1182	1171	1173	1208	1179	1198	1154	1187	1158	1184	1192	1167	1163	1164	1154	1197
122.97		1253	1203	1231	1242	1257	1200	1226	1286	1256	1224	1253	1229	1190	1221	1171	1160	1203	1208	1196	1205	1212	1244	1232	1220	1187	1201	1183	1198	1161	1132	1165	1198	1169	1178	1184	1202	1175	1193	1157	1189	1148	1180	1197	1164	1164	1164	1149	1189
123.97		1270	1216	1236	1240	1243	1216	1205	1296	1261	1229	1251	1221	1194	1210	1172	1165	1201	1220	1204	1214	1215	1250	1226	1229	1181	1210	1193	1210	1155	1148	1166	1187	1165	1182	1187	1216	1162	1208	1149	1193	1151	1174	1195	1164	1162	1170	1152	1192
124.97		1257	1203	1221	1227	1247	1201	1210	1286	1276	1220	1259	1232	1194	1208	1171	1179	1201	1220	1210	1201	1211	1253	1221	1229	1188	1202	1187	1218	1154	1130	1164	1189	1179	1182	1177	1215	1171	1201	1157	1190	1152	1180	1191	1153	1152	1162	1160	1200
125.97		1261	1196	1223	1240	1232	1203	1214	1293	1283	1222	1243	1226	1190	1201	1182	1163	1189	1217	1204	1207	1215	1252	1244	1212	1182	1207	1200	1198	1161	1149	1151	1181	1171	1173	1175	1201	1167	1201	1160	1189	1156	1170	1197	1160	1155	1162	1156	1200
126.97		1277	1199	1226	1228	1240	1200	1221	1276	1276	1222	1248	1226	1204	1208	1161	1167	1198	1217	1213	1198	1218	1247	1223	1226	1184	1196	1187	1195	1149	1121	1162	1196	1176	1186	1179	1202	1165	1195	1154	1194	1156	1173	1181	1157	1158	1160	1144	1193
127.97		1255	1204	1215	1237	1235	1195	1211	1281	1262	1222	1234	1221	1179	1208	1179	1163	1197	1211	1201	1200	1205	1243	1232	1206	1176	1188	1181	1214	1140	1139	1154	1182	1154	1166	1172	1204	1175	1190	1149	1179	1153	1174	1184	1164	1154	1160	1144	1190
128.97		1253	1203	1225	1227	1245	1203	1216	1291	1267	1229	1241	1226	1205	1219	1171	1168	1184	1203	1207	1203	1211	1244	1221	1223	1178	1205	1183	1213	1155	1136	1157	1177	1168	1175	1187	1205	1162	1188	1157	1197	1141	1162	1191	1165	1147	1148	1148	1194
129.97		1264	1208	1225	1225	1238	1198	1206	1284	1279	1232	1241	1224	1202	1198	1171	1167	1198	1222	1199	1203	1203	1231	1223	1208	1184	1193	1187	1203	1147	1137	1161	1182	1169	1185	1172	1201	1171	1198	1150	1193	1144	1162	1192	1160	1151	1168	1147	1193
130.97		1257	1216	1225	1233	1233	1195	1198	1278	1267	1209	1243	1216	1184	1199	1159	1154	1198	1205	1205	1194	1203	1241	1223	1212	1166	1193	1195	1190	1149	1133	1145	1180	1168	1176	1175	1193	1161	1188	1152	1193	1152	1173	1178	1162	1155	1146	1151	1184
131.97		1257	1199	1228	1220	1232	1196	1201	1266	1262	1224	1241	1212	1179	1213	1156	1162	1189	1211	1202	1191	1199	1244	1223	1206	1178	1194	1181	1197	1146	1133	1151	1181	1168	1169	1180	1197	1162	1194	1152	1190	1152	1161	1189	1144	1141	1156	1144	1182
132.97		1255	1201	1233	1233	1227	1203	1216	1283	1261	1219	1231	1227	1187	1199	1172	1159	1195	1206	1198	1207	1211	1241	1222	1224	1172	1184	1181	1197	1165	1129	1161	1178	1168	1171	1172	1187	1165	1193	1161	1186	1151	1167	1169	1158	1151	1152	1148	1186
133.97		1244	1196	1223	1232	1227	1188	1216	1278	1254	1222	1243	1214	1184	1191	1172	1162	1190	1206	1196	1194	1199	1240	1221	1208	1176	1191	1178	1203	1144	1116	1152	1173	1168	1166	1157	1197	1167	1183	1135	1183	1142	1165	1178	1147	1147	1154	1138	1181
134.97		1246	1193	1221	1232	1225	1191	1208	1279	1274	1215	1243	1216	1184	1208	1181	1152	1197	1214	1193	1188	1206	1231	1213	1209	1188	1182	1181	1205	1154	1123	1141	1177	1166	1168	1166	1195	1145	1177	1157	1186	1135	1162	1188	1155	1147	1157	1143	1181
135.97		1253	1198	1206	1225	1233	1203	1211	1261	1252	1212	1236	1211	1195	1205	1177	1167	1187	1213	1193	1183	1203	1241	1209	1206	1172	1196	1183	1197	1144	1126	1148	1164	1165	1162	1168	1198	1151	1180	1150	1177	1145	1158	1179	1154	1141	1148	1147	1186
136.97		1240	1206	1210	1217	1242	1193	1195	1261	1262	1202	1238	1206	1189	1183	1164	1151	1178	1209	1189	1186	1196	1244	1212	1215	1178	1191	1179	1186	1143	1113	1144	1180	1164	1158	1172	1194	1162	1178	1153	1187	1138	1157	1181	1153	1148	1153	1135	1182
137.97		1242	1208	1218	1232	1227	1198	1205	1253	1251	1207	1213	1199	1175	1198	1154	1160	1184	1196	1186	1200	1203	1224	1204	1198	1175	1179	1172	1186	1146	1133	1149	1173	1162	1159	1168	1194	1158	1183	1142	1180	1144	1168	1182	1147	1147	1152	1147	1188
138.97		1240	1206	1215	1210	1235	1190	1210	1278	1247	1225	1236	1217	1190	1189	1161	1152	1200	1191	1196	1188	1205	1226	1209	1203	1160	1201	1169	1179	1143	1121	1151	1178	1165	1162	1157	1173	1149	1190	1138	1176	1144	1167	1182	1155	1151	1146	1135	1184
139.97		1257	1187	1216	1220	1217	1185	1201	1274	1264	1217	1241	1224	1187	1198	1148	1152	1183	1200	1195	1183	1196	1226	1216	1215	1176	1187	1181	1195	1144	1121	1149	1185	1172	1159	1155	1191	1161	1176	1149	1177	1141	1154	1184	1161	1140	1161	1138	1184
140.97		1250	1199	1213	1215	1222	1195	1208	1286	1252	1205	1223	1212	1185	1201	1166	1165	1180	1208	1195	1194	1206	1234	1216	1203	1170	1188	1164	1197	1132	1126	1152	1170	1152	1162	1159	1194	1159	1183	1142	1181	1137	1165	1175	1157	1137	1141	1132	1180
141.97		1244	1191	1210	1218	1240	1183	1193	1278	1247	1215	1234	1211	1175	1201	1154	1157	1186	1197	1192	1183	1206	1232	1207	1199	1170	1198	1170	1198	1135	1130	1164	1182	1162	1158	1164	1194	1159	1183	1146	1170	1146	1162	1182	1144	1149	1149	1132	1176
142.97		1235	1193	1221	1220	1207	1188	1198	1261	1252	1215	1231	1206	1177	1192	1153	1154	1186	1205	1185	1183	1196	1220	1216	1202	1169	1181	1167	1197	1141	1136	1151	1176	1165	1164	1157	1184	1149	1185	1149	1171	1129	1155	1182	1149	1154	1145	1147	1177
143.97		1255	1191	1206	1213	1217	1195	1206	1259	1252	1222	1228	1206	1182	1206	1166	1149	1178	1205	1183	1195	1188	1231	1207	1200	1158	1178	1167	1192	1158	1123	1155	1170	1144	1166	1161	1184	1154	1173	1146	1167	1141	1158	1189	1153	1137	1144	1139	1178
144.97		1250	1177	1195	1220	1228	1183	1201	1256	1252	1199	1224	1201	1189	1183	1158	1152	1186	1200	1188	1185	1205	1217	1210	1211	1173	1173	1183	1195	1129	1127	1144	1164	1147	1148	1159	1180	1161	1180	1147	1174	1141	1145	1172	1151	1149	1148	1139	1166
145.97		1246	1187	1206	1235	1212	1183	1197	1251	1252	1200	1241	1216	1174	1205	1143	1156	1178	1202	1179	1182	1197	1227	1218	1196	1164	1185	1164	1198	1133	1117	1142	1177	1158	1165	1172	1182	1154	1187	1147	1187	1135	1157	1182	1150	1140	1134	1144	1182
146.97		1250	1181	1203	1217	1225	1193	1195	1261	1252	1204	1226	1207	1177	1187	1159	1143	1186	1209	1183	1182	1203	1221	1210	1196	1164	1196	1164	1203	1132	1116	1144	1176	1148	1154	1159	1188	1159	1187	1138	1173	1141	1152	1168	1155	1140	1140	1141	1177
147.97		1248	1187	1210	1210	1220	1196	1200	1263	1244	1214	1224	1212	1179	1191	1166	1156	1184	1196	1191	1180	1188	1226	1209	1209	1166	1185	1167	1186	1152	1132	1144	1162	1155	1152	1162	1190	1157	1177	1143	1173	1135	1157	1158	1144	1140	1148	1135	1177
148.97		1244	1186	1208	1218	1225	1182	1192	1254	1246	1205	1214	1207	1170	1189	1164	1152	1183	1191	1185	1177	1191	1229	1197	1211	1160	1187	1164	1181	1138	1127	1147	1178	1158	1158	1155	1175	1141	1167	1147	1171	1131	1152	1172	1140	1152	1148	1130	1172
149.97		1238	1189	1201	1215	1214	1180	1197	1261	1266	1200	1228	1199	1175	1182	1148	1154	1194	1197	1177	1180	1194	1223	1210	1198	1158	1178	1169	1189	1122	1119	1148	1167	1152	1152	1150	1194	1157	1187	1134	1171	1144	1157	1168	1136	1143	1153	1131	1173
150.97		1229	1193	1201	1217	1218	1177	1195	1258	1244	1207	1224	1207	1165	1178	1154	1138	1190	1200	1189	1173	1197	1229	1201	1196	1173	1176	1169	1178	1129	1120	1134	1162	1151	1161	1144	1179	1152	1180	1138	1166	1137	1151	1166	1144	1135	1137	1145	1173
151.97		1246	1196	1210	1208	1227	1183	1201	1268	1249	1202	1221	1209	1170	1196	1151	1143	1189	1190	1183	1179	1179	1224	1216	1198	1164	1172	1155	1179	1149	1111	1155	1167	1152	1161	1153	1183	1162	1176	1139	1176	1142	1146	1166	1144	1129	1140	1130	1166
152.97		1244	1176	1210	1212	1220	1190	1192	1248	1242	1217	1231	1204	1172	1187	1156	1141	1190	1203	1186	1177	1182	1218	1210	1200	1154	1170	1153	1200	1135	1113	1144	1166	1143	1152	1154	1186	1154	1180	1139	1166	1125	1152	1176	1147	1144	1138	1126	1169
153.97		1224	1194	1200	1210	1199	1173	1205	1259	1232	1202	1223	1190	1167	1175	1154	1151	1178	1191	1174	1186	1191	1214	1204	1192	1158	1173	1155	1176	1151	1108	1140	1159	1151	1161	1158	1168	1154	1166	1129	1173	1128	1146	1166	1143	1133	1142	1122	1173
154.97		1233	1182	1203	1208	1215	1185	1195	1253	1249	1205	1218	1201	1162	1192	1141	1138	1172	1193	1182	1195	1190	1211	1198	1200	1167	1176	1161	1189	1146	1110	1124	1171	1145	1158	1150	1172	1148	1168	1131	1167	1141	1157	1156	1143	1143	1132	1132	1165
155.97		1237	1186	1203	1207	1215	1190	1195	1253	1252	1199	1214	1199	1169	1171	1148	1137	1178	1200	1182	1168	1188	1212	1201	1192	1155	1170	1155	1192	1133	1123	1134	1163	1150	1165	1146	1173	1145	1167	1131	1163	1135	1148	1159	1131	1133	1133	1138	1165
156.97		1227	1184	1196	1200	1200	1165	1174	1259	1232	1195	1214	1187	1174	1192	1150	1149	1172	1206	1177	1173	1194	1224	1195	1189	1151	1179	1169	1181	1147	1110	1145	1158	1141	1152	1140	1176	1142	1160	1141	1166	1135	1151	1168	1131	1132	1124	1131	1162
157.97		1227	1174	1193	1203	1210	1177	1190	1249	1241	1199	1221	1197	1174	1194	1145	1138	1178	1196	1180	1170	1190	1220	1204	1187	1185	1175	1155	1187	1130	1114	1131	1152	1140	1145	1142	1177	1151	1171	1141	1159	1135	1151	1158	1147	1137	1136	1126	1168
158.97		1229	1169	1191	1210	1217	1173	1193	1248	1242	1205	1229	1207	1158	1182	1146	1149	1169	1188	1171	1159	1176	1206	1191	1193	1164	1191	1161	1182	1129	1114	1132	1152	1141	1164	1150	1169	1139	1150	1131	1151	1132	1149	1159	1142	1135	1129	1131	1169
159.97		1233	1172	1200	1200	1212	1177	1201	1261	1239	1199	1216	1195	1167	1183	1156	1145	1159	1200	1177	1167	1175	1206	1194	1180	1152	1176	1156	1190	1119	1110	1127	1163	1145	1152	1148	1173	1151	1171	1123	1154	1124	1146	1165	1131	1133	1126	1121	1165
160.97		1237	1181	1198	1208	1209	1188	1182	1258	1246	1190	1219	1195	1165	1180	1158	1132	1186	1200	1171	1165	1184	1218	1195	1189	1169	1178	1153	1181	1138	1110	1135	1156	1140	1159	1146	1177	1132	1164	1134	1156	1124	1152	1168	1139	1129	1142	1131	1160
161.97		1238	1182	1201	1203	1214	1177	1192	1253	1239	1197	1209	1199	1170	1176	1146	1140	1172	1190	1188	1171	1176	1205	1200	1189	1157	1167	1153	1174	1126	1120	1134	1155	1154	1135	1151	1177	1157	1178	1124	1164	1127	1152	1162	1139	1131	1134	1126	1165
162.97		1227	1181	1211	1198	1215	1177	1180	1256	1237	1182	1221	1202	1148	1176	1146	1151	1184	1186	1180	1179	1181	1209	1200	1189	1161	1173	1162	1173	1127	1120	1137	1162	1157	1148	1144	1176	1144	1166	1142	1176	1127	1146	1158	1143	1128	1136	1128	1162
163.97		1242	1186	1211	1205	1209	1183	1182	1248	1232	1202	1213	1194	1162	1189	1153	1143	1170	1191	1171	1176	1193	1212	1197	1181	1155	1164	1156	1187	1147	1113	1144	1162	1144	1165	1151	1180	1148	1164	1132	1169	1120	1149	1162	1146	1144	1134	1117	1161
164.97		1220	1186	1193	1202	1195	1175	1175	1238	1239	1189	1209	1201	1153	1169	1140	1140	1173	1191	1164	1179	1184	1214	1197	1189	1149	1163	1166	1179	1133	1105	1130	1153	1136	1140	1150	1165	1152	1163	1131	1157	1125	1145	1160	1136	1135	1129	1127	1147
165.97		1225	1177	1186	1210	1214	1177	1185	1254	1237	1190	1221	1189	1155	1173	1150	1140	1167	1194	1180	1171	1184	1220	1185	1192	1160	1169	1158	1179	1135	1105	1128	1152	1143	1142	1148	1176	1145	1166	1138	1150	1122	1143	1166	1127	1135	1133	1130	1168
166.97		1231	1194	1198	1210	1209	1175	1177	1244	1239	1184	1208	1195	1167	1180	1158	1138	1172	1177	1167	1168	1170	1209	1189	1186	1152	1164	1155	1182	1127	1108	1137	1148	1141	1148	1150	1168	1144	1168	1134	1161	1121	1143	1159	1132	1131	1137	1122	1154
167.97		1229	1176	1200	1205	1207	1182	1195	1256	1232	1197	1214	1201	1157	1171	1135	1151	1176	1183	1180	1173	1176	1212	1189	1189	1154	1167	1159	1184	1124	1114	1131	1151	1138	1152	1148	1172	1144	1167	1128	1160	1124	1143	1162	1142	1128	1125	1122	1166
168.97		1218	1196	1185	1203	1205	1177	1184	1243	1227	1187	1218	1194	1155	1175	1145	1135	1172	1183	1177	1161	1182	1202	1195	1184	1145	1160	1148	1181	1127	1114	1138	1153	1136	1144	1147	1175	1141	1167	1135	1171	1107	1134	1153	1135	1123	1128	1125	1176
169.97		1237	1171	1193	1195	1204	1169	1195	1249	1229	1190	1204	1197	1150	1175	1141	1122	1169	1186	1176	1164	1181	1217	1203	1199	1148	1160	1133	1181	1116	1097	1118	1156	1136	1145	1142	1165	1137	1170	1123	1150	1115	1145	1150	1132	1135	1132	1125	1154
170.97		1225	1171	1181	1205	1209	1177	1185	1238	1220	1181	1216	1207	1162	1176	1125	1132	1167	1177	1167	1161	1181	1217	1197	1175	1151	1167	1161	1168	1127	1087	1132	1139	1138	1138	1142	1172	1148	1158	1125	1151	1131	1154	1156	1139	1132	1122	1121	1164
171.97		1238	1176	1198	1186	1207	1175	1169	1251	1234	1181	1209	1180	1162	1183	1148	1143	1165	1185	1179	1168	1181	1209	1192	1190	1157	1166	1153	1184	1135	1110	1134	1145	1136	1151	1142	1154	1152	1177	1121	1150	1124	1149	1149	1133	1120	1138	1122	1158
172.97		1225	1164	1183	1193	1194	1160	1190	1236	1232	1179	1211	1189	1162	1176	1127	1135	1158	1182	1168	1158	1170	1202	1189	1181	1145	1160	1156	1157	1122	1101	1130	1141	1143	1158	1146	1175	1148	1164	1138	1157	1131	1127	1155	1118	1128	1125	1119	1173
173.97		1220	1164	1190	1207	1200	1172	1171	1243	1229	1186	1196	1194	1167	1178	1122	1129	1170	1188	1171	1168	1184	1202	1186	1180	1146	1166	1153	1173	1124	1105	1132	1155	1138	1145	1136	1166	1142	1161	1125	1151	1127	1139	1158	1122	1120	1125	1114	1164
174.97		1222	1162	1176	1192	1204	1164	1190	1238	1230	1186	1214	1190	1158	1178	1130	1132	1165	1179	1171	1161	1179	1202	1192	1195	1170	1169	1166	1174	1126	1105	1117	1153	1138	1141	1137	1164	1145	1173	1129	1163	1127	1136	1158	1125	1120	1133	1117	1161
175.97		1212	1165	1188	1200	1200	1170	1174	1241	1229	1194	1199	1189	1157	1168	1128	1141	1162	1180	1158	1156	1167	1203	1198	1180	1158	1163	1142	1157	1137	1103	1130	1164	1127	1150	1144	1164	1142	1147	1136	1153	1117	1134	1163	1140	1131	1128	1123	1158
176.97		1233	1171	1185	1185	1202	1170	1184	1258	1234	1187	1209	1187	1148	1171	1145	1145	1164	1173	1165	1156	1185	1206	1189	1183	1158	1161	1155	1173	1122	1107	1135	1152	1132	1148	1147	1179	1141	1167	1127	1149	1125	1145	1153	1118	1123	1132	1113	1158
177.97		1231	1169	1190	1208	1192	1164	1185	1234	1237	1172	1208	1185	1160	1173	1128	1140	1176	1174	1176	1161	1172	1206	1188	1175	1145	1149	1152	1184	1129	1105	1127	1155	1140	1140	1161	1173	1139	1168	1125	1153	1129	1149	1173	1131	1121	1138	1125	1164
178.97		1214	1164	1190	1186	1204	1177	1177	1241	1219	1177	1201	1194	1162	1164	1141	1140	1183	1168	1162	1167	1178	1203	1189	1168	1166	1166	1155	1171	1119	1107	1135	1144	1129	1152	1144	1160	1151	1160	1132	1163	1115	1146	1153	1136	1117	1133	1115	1156
179.97		1214	1160	1180	1186	1197	1169	1172	1239	1217	1179	1211	1189	1167	1169	1127	1122	1167	1176	1162	1162	1188	1208	1201	1190	1148	1163	1158	1179	1115	1105	1123	1156	1136	1144	1143	1161	1144	1151	1123	1167	1120	1130	1153	1124	1124	1121	1113	1156
180.97		1218	1165	1186	1210	1182	1155	1182	1234	1222	1194	1192	1174	1152	1171	1137	1135	1173	1167	1162	1164	1175	1205	1186	1172	1149	1154	1152	1157	1115	1100	1130	1139	1127	1140	1136	1155	1137	1154	1125	1149	1118	1140	1150	1136	1128	1121	1123	1157
181.97		1222	1165	1185	1197	1197	1177	1162	1229	1210	1182	1209	1192	1148	1173	1133	1133	1169	1186	1171	1162	1169	1211	1177	1183	1143	1158	1152	1179	1124	1104	1141	1142	1134	1140	1140	1165	1134	1153	1117	1151	1115	1142	1152	1135	1131	1129	1119	1150
182.97		1237	1165	1193	1198	1192	1165	1187	1244	1232	1190	1206	1182	1165	1175	1140	1148	1162	1179	1173	1167	1185	1215	1183	1192	1154	1154	1138	1176	1124	1110	1118	1144	1140	1142	1143	1168	1139	1143	1117	1151	1114	1142	1146	1132	1120	1137	1119	1147
183.97		1225	1157	1178	1190	1200	1169	1169	1244	1237	1169	1213	1187	1162	1176	1122	1129	1165	1182	1164	1165	1166	1217	1183	1168	1146	1158	1159	1171	1129	1101	1131	1149	1132	1150	1137	1155	1141	1154	1123	1156	1110	1139	1160	1129	1117	1133	1117	1162
184.97		1216	1165	1185	1195	1202	1173	1167	1236	1227	1186	1204	1189	1147	1169	1128	1140	1161	1179	1167	1159	1172	1200	1186	1195	1149	1167	1155	1171	1118	1097	1121	1152	1126	1142	1137	1164	1131	1166	1124	1159	1129	1139	1147	1129	1120	1126	1113	1156
185.97		1216	1155	1180	1198	1202	1159	1179	1253	1220	1189	1206	1189	1143	1159	1140	1133	1158	1180	1161	1155	1160	1196	1174	1171	1137	1155	1147	1163	1119	1094	1123	1141	1138	1133	1129	1157	1137	1160	1118	1146	1129	1140	1152	1122	1123	1126	1104	1150
186.97		1218	1162	1181	1186	1205	1160	1187	1241	1227	1179	1204	1194	1152	1162	1137	1133	1161	1179	1159	1173	1178	1203	1189	1168	1148	1160	1150	1176	1119	1098	1124	1149	1129	1148	1151	1165	1132	1151	1127	1150	1117	1143	1146	1121	1115	1124	1114	1166
187.97		1229	1174	1180	1195	1207	1155	1169	1243	1229	1174	1208	1184	1155	1176	1137	1135	1158	1174	1153	1159	1163	1193	1182	1181	1146	1172	1144	1166	1116	1100	1125	1134	1126	1144	1142	1166	1135	1147	1109	1150	1128	1136	1147	1127	1123	1124	1104	1150
188.97		1220	1157	1180	1192	1194	1155	1175	1241	1222	1179	1201	1192	1153	1157	1132	1119	1148	1180	1161	1164	1167	1203	1188	1180	1143	1164	1147	1182	1107	1100	1115	1138	1136	1144	1140	1162	1148	1156	1113	1150	1108	1132	1155	1117	1120	1113	1114	1143
189.97		1222	1152	1178	1181	1195	1147	1175	1231	1229	1181	1204	1182	1153	1175	1120	1146	1151	1180	1159	1162	1161	1202	1182	1174	1148	1150	1145	1168	1116	1087	1115	1134	1126	1142	1143	1158	1131	1160	1121	1140	1112	1136	1147	1124	1117	1128	1110	1153
190.97		1218	1157	1180	1192	1199	1159	1161	1236	1224	1174	1187	1167	1164	1173	1119	1130	1142	1170	1143	1148	1173	1196	1174	1166	1140	1150	1131	1160	1121	1091	1113	1131	1116	1140	1144	1151	1127	1153	1107	1146	1111	1121	1147	1118	1105	1122	1110	1150
191.97		1220	1182	1180	1193	1192	1160	1166	1231	1229	1177	1192	1180	1150	1168	1133	1119	1167	1159	1161	1158	1167	1193	1182	1162	1148	1146	1142	1166	1122	1104	1120	1135	1126	1131	1136	1151	1138	1160	1117	1159	1118	1139	1156	1124	1116	1126	1112	1137
192.97		1216	1157	1181	1180	1194	1155	1179	1228	1220	1174	1203	1169	1143	1173	1125	1122	1155	1180	1164	1159	1154	1193	1173	1172	1142	1144	1147	1171	1116	1103	1131	1144	1136	1130	1135	1161	1110	1153	1106	1143	1117	1134	1147	1111	1113	1125	1109	1137
193.97		1222	1157	1183	1188	1185	1162	1171	1248	1220	1186	1189	1180	1140	1152	1125	1146	1153	1156	1155	1149	1167	1188	1179	1168	1146	1158	1139	1168	1116	1095	1120	1144	1129	1138	1144	1161	1125	1156	1116	1143	1104	1136	1152	1129	1113	1109	1106	1147
194.97		1224	1154	1159	1186	1194	1162	1177	1239	1217	1171	1199	1165	1137	1159	1132	1124	1167	1170	1164	1139	1167	1202	1170	1163	1136	1152	1152	1154	1116	1088	1121	1145	1129	1131	1135	1153	1134	1146	1121	1137	1104	1120	1149	1140	1119	1121	1113	1158
195.97		1212	1167	1176	1192	1187	1159	1174	1244	1215	1179	1199	1174	1150	1168	1127	1124	1153	1165	1152	1162	1170	1197	1183	1175	1142	1143	1130	1173	1121	1094	1115	1133	1125	1128	1136	1161	1135	1146	1116	1146	1112	1132	1153	1129	1124	1118	1109	1164
196.97		1214	1155	1180	1185	1192	1159	1171	1231	1220	1181	1191	1170	1153	1153	1138	1133	1151	1173	1161	1146	1172	1191	1163	1169	1137	1152	1142	1154	1138	1088	1117	1134	1126	1133	1132	1154	1127	1154	1120	1137	1105	1126	1146	1124	1112	1116	1104	1144
197.97		1218	1165	1178	1183	1184	1164	1164	1224	1230	1174	1189	1175	1158	1166	1128	1127	1164	1160	1152	1158	1172	1194	1167	1165	1149	1149	1133	1157	1104	1085	1127	1141	1123	1130	1132	1169	1132	1146	1117	1143	1111	1129	1142	1133	1113	1125	1110	1156
198.97		1199	1174	1166	1190	1195	1172	1164	1224	1222	1182	1204	1165	1145	1155	1132	1122	1141	1168	1153	1139	1163	1190	1169	1168	1146	1157	1153	1165	1115	1100	1118	1128	1123	1137	1135	1158	1117	1154	1109	1146	1105	1133	1150	1125	1112	1120	1110	1145
199.97		1211	1150	1166	1190	1187	1147	1174	1239	1214	1182	1214	1185	1157	1159	1133	1126	1158	1170	1164	1161	1169	1202	1179	1177	1142	1163	1139	1163	1101	1091	1123	1137	1123	1137	1131	1155	1147	1149	1127	1153	1112	1140	1149	1117	1121	1118	1114	1160
200.97		1203	1143	1170	1186	1185	1159	1171	1238	1229	1174	1197	1170	1143	1162	1120	1129	1153	1163	1155	1165	1164	1200	1177	1180	1127	1141	1147	1157	1127	1100	1125	1137	1125	1126	1147	1161	1135	1150	1121	1140	1111	1129	1147	1125	1107	1126	1106	1148
201.97		1218	1160	1170	1186	1185	1160	1153	1238	1229	1172	1201	1165	1150	1157	1125	1126	1158	1168	1150	1148	1163	1196	1176	1153	1136	1149	1133	1163	1108	1095	1124	1139	1118	1126	1131	1142	1137	1150	1116	1137	1112	1126	1146	1122	1116	1118	1108	1141
202.97		1198	1159	1170	1198	1199	1151	1151	1231	1205	1174	1194	1187	1143	1175	1120	1124	1153	1176	1161	1154	1167	1199	1174	1172	1130	1160	1135	1166	1102	1100	1125	1142	1119	1131	1133	1151	1134	1160	1116	1141	1115	1140	1134	1135	1115	1120	1108	1136
203.97		1214	1171	1166	1185	1189	1154	1172	1218	1214	1164	1199	1155	1135	1162	1127	1108	1150	1163	1155	1154	1155	1179	1173	1166	1142	1150	1127	1162	1113	1105	1118	1139	1129	1126	1139	1151	1131	1151	1121	1137	1117	1137	1134	1124	1113	1112	1108	1136
204.97		1216	1152	1164	1171	1177	1139	1174	1219	1212	1177	1204	1167	1138	1160	1130	1119	1155	1160	1141	1151	1152	1194	1179	1168	1140	1147	1131	1160	1116	1088	1114	1127	1125	1121	1129	1154	1131	1151	1124	1144	1097	1127	1149	1117	1112	1124	1109	1140
205.97		1209	1155	1171	1183	1197	1152	1171	1229	1217	1181	1194	1177	1138	1164	1128	1127	1141	1160	1152	1145	1149	1190	1170	1169	1142	1158	1141	1149	1116	1091	1111	1149	1116	1131	1133	1161	1141	1146	1121	1144	1117	1115	1139	1118	1112	1118	1101	1145
206.97		1222	1160	1173	1183	1184	1169	1159	1228	1212	1176	1196	1170	1140	1160	1128	1126	1156	1176	1153	1152	1167	1193	1174	1171	1130	1157	1142	1168	1119	1094	1110	1144	1123	1137	1133	1155	1131	1153	1116	1139	1111	1137	1147	1117	1117	1124	1110	1149
207.97		1225	1164	1164	1197	1190	1162	1169	1228	1215	1182	1187	1170	1143	1164	1128	1121	1161	1173	1153	1161	1157	1208	1166	1165	1148	1149	1131	1166	1113	1098	1117	1131	1136	1137	1140	1153	1121	1143	1111	1134	1111	1127	1142	1128	1115	1110	1110	1143
208.97		1209	1160	1171	1161	1185	1162	1166	1218	1198	1162	1194	1187	1135	1168	1122	1129	1150	1168	1153	1158	1154	1194	1173	1162	1136	1154	1141	1157	1115	1091	1113	1139	1130	1133	1122	1158	1131	1147	1117	1139	1104	1132	1147	1125	1097	1112	1109	1153
209.97		1216	1167	1173	1192	1187	1155	1171	1228	1217	1172	1203	1180	1157	1169	1125	1118	1147	1170	1143	1155	1149	1196	1173	1161	1139	1158	1139	1174	1113	1100	1108	1144	1125	1134	1136	1154	1127	1143	1120	1154	1101	1129	1159	1122	1119	1122	1100	1139
210.97		1212	1159	1175	1171	1202	1162	1162	1223	1224	1177	1191	1170	1150	1168	1125	1121	1151	1176	1158	1146	1155	1193	1177	1163	1131	1154	1138	1162	1112	1097	1108	1127	1120	1124	1131	1150	1120	1146	1118	1133	1103	1136	1149	1122	1112	1120	1110	1145
211.97		1198	1160	1168	1175	1187	1159	1151	1219	1215	1162	1187	1172	1147	1152	1124	1127	1156	1171	1140	1148	1158	1185	1173	1175	1137	1157	1130	1162	1107	1091	1111	1137	1116	1127	1131	1151	1127	1146	1114	1147	1111	1120	1136	1113	1119	1120	1121	1141
212.97		1214	1157	1173	1190	1187	1157	1164	1226	1212	1172	1192	1167	1148	1153	1115	1118	1151	1171	1149	1143	1158	1176	1169	1163	1140	1147	1131	1163	1107	1091	1117	1126	1106	1126	1135	1140	1121	1139	1113	1136	1104	1132	1136	1109	1117	1122	1096	1145
213.97		1216	1137	1175	1188	1177	1152	1167	1229	1209	1159	1194	1174	1143	1150	1119	1115	1161	1162	1149	1149	1149	1180	1174	1165	1136	1146	1133	1170	1113	1092	1120	1134	1118	1123	1126	1147	1132	1143	1113	1141	1103	1134	1140	1109	1103	1116	1104	1152
214.97		1207	1157	1166	1183	1172	1159	1164	1224	1205	1164	1189	1170	1143	1162	1109	1118	1147	1176	1143	1154	1154	1185	1164	1165	1131	1150	1135	1147	1108	1089	1108	1124	1112	1120	1133	1153	1127	1136	1113	1133	1111	1130	1136	1114	1104	1101	1109	1137
215.97		1205	1143	1175	1175	1177	1151	1167	1228	1197	1162	1189	1167	1152	1169	1112	1121	1148	1167	1149	1143	1151	1184	1173	1158	1139	1157	1138	1160	1110	1087	1117	1137	1129	1123	1122	1158	1135	1143	1111	1144	1105	1127	1129	1120	1109	1118	1109	1136
216.97		1205	1159	1170	1176	1189	1167	1174	1221	1203	1167	1189	1175	1152	1138	1130	1118	1151	1168	1147	1152	1160	1185	1158	1158	1134	1137	1133	1162	1110	1081	1101	1133	1122	1126	1128	1158	1118	1150	1107	1141	1110	1126	1139	1110	1115	1114	1108	1147
217.97		1205	1148	1149	1181	1180	1146	1174	1211	1205	1167	1189	1159	1133	1155	1120	1124	1158	1157	1146	1145	1163	1191	1172	1161	1134	1141	1119	1154	1112	1100	1114	1135	1122	1124	1126	1151	1118	1150	1109	1133	1117	1126	1136	1107	1108	1121	1112	1149
218.97		1199	1148	1170	1185	1182	1149	1180	1224	1202	1172	1192	1172	1145	1160	1130	1119	1155	1179	1146	1139	1160	1188	1158	1166	1128	1146	1131	1154	1110	1079	1104	1134	1115	1130	1131	1148	1135	1147	1118	1141	1110	1123	1136	1106	1103	1122	1112	1139
219.97		1205	1148	1166	1176	1185	1141	1154	1221	1210	1164	1191	1159	1147	1157	1128	1118	1153	1167	1150	1142	1166	1185	1167	1166	1136	1137	1127	1160	1110	1073	1098	1126	1108	1134	1118	1142	1122	1151	1121	1133	1108	1124	1136	1114	1107	1116	1101	1147
220.97		1211	1135	1154	1175	1170	1154	1169	1231	1195	1172	1187	1174	1142	1159	1127	1121	1155	1168	1144	1148	1155	1191	1166	1152	1136	1160	1125	1158	1104	1079	1111	1128	1120	1131	1122	1144	1118	1140	1117	1136	1107	1123	1140	1114	1109	1121	1097	1141
221.97		1198	1152	1161	1170	1185	1152	1151	1226	1210	1166	1187	1162	1138	1157	1115	1116	1144	1147	1137	1146	1166	1176	1170	1161	1134	1154	1131	1154	1107	1085	1108	1123	1113	1123	1126	1146	1128	1136	1117	1126	1104	1117	1130	1116	1104	1101	1106	1150
222.97		1205	1147	1168	1163	1172	1151	1153	1218	1198	1167	1192	1185	1132	1160	1109	1122	1155	1150	1146	1151	1146	1174	1164	1146	1136	1149	1136	1155	1105	1085	1120	1138	1115	1121	1125	1148	1127	1154	1114	1128	1114	1133	1133	1122	1104	1114	1106	1144
223.97		1201	1152	1171	1171	1175	1147	1159	1223	1209	1159	1181	1169	1133	1134	1122	1107	1145	1168	1147	1143	1164	1184	1170	1163	1119	1146	1135	1152	1108	1084	1103	1128	1119	1117	1132	1146	1125	1139	1110	1140	1098	1123	1137	1117	1103	1114	1096	1145
224.97		1203	1150	1163	1175	1169	1162	1172	1224	1205	1181	1189	1167	1120	1150	1122	1121	1142	1154	1149	1152	1158	1184	1160	1166	1131	1140	1128	1141	1096	1079	1107	1139	1125	1128	1124	1148	1118	1146	1110	1141	1103	1123	1133	1107	1108	1118	1100	1140
225.97		1198	1145	1148	1175	1165	1142	1166	1211	1198	1156	1172	1162	1143	1146	1124	1113	1151	1156	1143	1155	1157	1179	1169	1150	1130	1132	1128	1154	1097	1081	1094	1123	1098	1120	1120	1148	1125	1137	1107	1133	1112	1120	1127	1113	1108	1113	1086	1131
226.97		1199	1157	1156	1185	1175	1147	1167	1209	1202	1147	1186	1160	1130	1164	1112	1115	1144	1156	1137	1134	1163	1185	1157	1150	1130	1143	1133	1142	1116	1078	1115	1126	1109	1127	1126	1143	1118	1147	1117	1123	1105	1117	1136	1127	1107	1117	1100	1141
227.97		1203	1145	1166	1171	1180	1139	1161	1214	1210	1159	1182	1175	1142	1146	1120	1113	1147	1170	1137	1137	1155	1171	1157	1166	1130	1144	1114	1147	1099	1072	1108	1126	1105	1124	1114	1132	1127	1130	1111	1137	1103	1123	1133	1117	1105	1109	1096	1125
228.97		1201	1157	1170	1166	1185	1151	1158	1216	1215	1166	1184	1170	1138	1141	1120	1118	1153	1167	1149	1142	1137	1182	1170	1159	1140	1144	1139	1134	1107	1089	1108	1127	1111	1128	1121	1154	1121	1144	1113	1141	1097	1117	1134	1110	1107	1106	1105	1128
229.97		1196	1152	1168	1160	1169	1149	1159	1218	1203	1172	1187	1170	1143	1146	1109	1116	1153	1153	1141	1134	1160	1179	1167	1162	1133	1138	1125	1149	1105	1084	1101	1131	1112	1124	1121	1139	1120	1141	1111	1131	1107	1117	1132	1118	1105	1102	1105	1143
230.97		1194	1137	1164	1173	1180	1154	1166	1221	1212	1157	1191	1159	1128	1150	1104	1130	1153	1165	1141	1142	1148	1174	1169	1163	1124	1140	1118	1150	1105	1082	1110	1130	1118	1120	1128	1146	1121	1141	1118	1144	1098	1126	1129	1116	1113	1110	1099	1140
231.97		1190	1143	1166	1175	1175	1149	1164	1219	1205	1157	1186	1177	1120	1155	1119	1108	1155	1157	1140	1137	1161	1180	1176	1166	1124	1135	1114	1142	1108	1075	1097	1119	1116	1124	1118	1150	1129	1140	1105	1141	1091	1133	1142	1113	1104	1105	1099	1132
232.97		1207	1148	1151	1183	1185	1157	1166	1224	1190	1162	1184	1157	1133	1160	1120	1127	1147	1154	1140	1137	1149	1187	1164	1161	1133	1141	1133	1150	1113	1082	1118	1126	1118	1126	1122	1146	1118	1146	1109	1130	1100	1117	1130	1117	1093	1108	1114	1141
233.97		1188	1131	1153	1176	1174	1141	1153	1218	1200	1161	1177	1170	1122	1159	1112	1100	1148	1151	1155	1151	1154	1184	1158	1156	1131	1129	1127	1142	1102	1081	1110	1126	1116	1123	1117	1144	1125	1149	1105	1127	1097	1117	1124	1111	1096	1118	1101	1125
234.97		1192	1142	1161	1180	1182	1137	1159	1224	1203	1166	1192	1155	1137	1143	1110	1110	1144	1157	1152	1155	1152	1177	1169	1155	1128	1131	1131	1141	1104	1088	1111	1130	1106	1124	1120	1146	1117	1140	1100	1133	1105	1129	1136	1107	1104	1110	1102	1132
235.97		1209	1140	1146	1176	1175	1137	1153	1213	1202	1164	1189	1162	1132	1146	1115	1111	1151	1157	1140	1139	1151	1180	1158	1152	1127	1134	1127	1144	1104	1082	1090	1131	1125	1131	1117	1140	1124	1137	1110	1123	1093	1124	1133	1118	1108	1116	1100	1139
236.97		1190	1131	1159	1171	1160	1152	1159	1219	1197	1161	1196	1164	1143	1146	1104	1111	1142	1151	1140	1139	1149	1187	1157	1168	1122	1137	1122	1150	1093	1076	1107	1113	1115	1120	1125	1143	1115	1143	1100	1123	1103	1115	1137	1113	1108	1096	1091	1128
237.97		1198	1147	1171	1171	1177	1139	1158	1209	1195	1157	1176	1162	1137	1153	1115	1122	1145	1142	1124	1133	1152	1185	1155	1149	1124	1146	1122	1147	1108	1075	1093	1121	1108	1123	1115	1139	1120	1146	1107	1131	1112	1115	1129	1109	1109	1105	1105	1132
238.97		1211	1143	1164	1170	1154	1147	1156	1219	1205	1162	1182	1157	1128	1152	1122	1110	1144	1163	1133	1134	1158	1187	1169	1156	1127	1131	1125	1149	1115	1085	1101	1137	1104	1120	1124	1136	1118	1141	1100	1134	1100	1112	1117	1109	1108	1113	1097	1147
239.97		1198	1140	1148	1170	1169	1139	1161	1219	1205	1162	1182	1165	1147	1150	1117	1097	1134	1157	1146	1140	1154	1173	1164	1158	1133	1138	1124	1154	1099	1073	1097	1121	1115	1120	1124	1139	1118	1123	1116	1127	1100	1123	1130	1105	1105	1106	1089	1135
240.97		1188	1150	1161	1176	1170	1136	1154	1214	1207	1167	1176	1169	1132	1150	1115	1118	1144	1157	1141	1143	1149	1191	1151	1163	1131	1123	1124	1147	1090	1079	1104	1123	1109	1116	1120	1144	1127	1137	1107	1128	1097	1121	1116	1116	1103	1105	1097	1141
241.97		1194	1130	1151	1163	1164	1133	1148	1206	1198	1171	1177	1155	1132	1143	1117	1099	1134	1153	1137	1133	1152	1174	1154	1156	1128	1132	1119	1147	1110	1084	1103	1128	1099	1127	1122	1135	1115	1126	1095	1133	1097	1124	1136	1099	1101	1109	1108	1120
242.97		1186	1145	1161	1192	1189	1146	1156	1218	1209	1167	1172	1159	1130	1146	1112	1108	1151	1159	1128	1134	1148	1176	1167	1147	1131	1128	1107	1141	1099	1087	1101	1117	1108	1113	1118	1161	1122	1141	1102	1124	1091	1120	1124	1122	1098	1100	1099	1128
243.97		1203	1140	1164	1180	1179	1155	1156	1209	1197	1167	1181	1174	1150	1143	1102	1107	1139	1148	1137	1134	1146	1180	1164	1155	1116	1135	1127	1139	1118	1085	1101	1119	1112	1123	1115	1142	1120	1146	1099	1133	1101	1127	1126	1109	1100	1109	1099	1140
244.97		1199	1142	1153	1170	1174	1142	1151	1219	1200	1167	1184	1162	1128	1134	1115	1118	1137	1168	1128	1133	1152	1180	1160	1156	1136	1134	1122	1150	1102	1078	1090	1124	1111	1117	1113	1142	1107	1141	1093	1133	1101	1117	1137	1113	1103	1110	1102	1136
245.97		1192	1138	1151	1173	1162	1152	1151	1209	1198	1169	1167	1162	1142	1155	1099	1110	1136	1148	1131	1122	1160	1168	1161	1153	1128	1135	1125	1146	1105	1081	1096	1123	1112	1110	1117	1139	1114	1129	1109	1121	1101	1127	1140	1109	1100	1101	1100	1124
246.97		1198	1145	1156	1173	1174	1142	1154	1208	1212	1162	1177	1162	1135	1139	1109	1108	1139	1162	1139	1140	1151	1174	1172	1155	1127	1137	1128	1147	1110	1082	1103	1117	1101	1123	1124	1143	1122	1130	1109	1130	1101	1111	1124	1105	1101	1109	1104	1125
247.97		1199	1140	1148	1166	1175	1137	1151	1218	1197	1154	1182	1150	1135	1139	1110	1105	1139	1145	1130	1122	1149	1173	1161	1144	1119	1131	1125	1141	1107	1085	1101	1119	1106	1116	1110	1142	1110	1139	1113	1128	1097	1115	1133	1100	1103	1097	1095	1137
248.97		1201	1154	1151	1168	1160	1136	1156	1201	1202	1167	1192	1160	1127	1145	1102	1113	1137	1148	1143	1139	1152	1174	1169	1153	1125	1143	1124	1146	1104	1087	1114	1119	1111	1127	1115	1146	1122	1136	1116	1116	1095	1123	1133	1105	1107	1105	1097	1132
249.97		1188	1128	1154	1168	1169	1133	1154	1201	1203	1139	1176	1157	1132	1152	1115	1115	1141	1147	1140	1130	1139	1185	1163	1150	1122	1146	1133	1147	1104	1082	1103	1121	1098	1119	1121	1140	1117	1129	1099	1137	1100	1118	1117	1105	1105	1102	1091	1127
250.97		1190	1145	1158	1170	1165	1134	1143	1211	1212	1151	1189	1165	1120	1141	1112	1105	1133	1156	1133	1119	1155	1180	1163	1152	1119	1140	1130	1138	1104	1078	1101	1117	1113	1119	1117	1139	1118	1124	1099	1118	1104	1108	1110	1103	1096	1108	1082	1137
251.97		1179	1138	1153	1165	1162	1152	1145	1216	1200	1161	1174	1160	1132	1138	1119	1104	1145	1151	1146	1136	1140	1173	1160	1156	1131	1132	1133	1152	1093	1079	1108	1124	1118	1119	1107	1136	1117	1130	1102	1137	1093	1109	1124	1099	1101	1104	1095	1124
252.97		1205	1138	1154	1166	1159	1144	1156	1203	1197	1154	1182	1164	1125	1139	1091	1108	1137	1147	1143	1130	1145	1176	1157	1161	1122	1137	1135	1149	1105	1078	1091	1117	1101	1117	1113	1136	1112	1136	1093	1136	1087	1111	1129	1111	1097	1104	1095	1127
253.97		1194	1121	1143	1165	1170	1144	1151	1219	1193	1161	1172	1159	1122	1145	1104	1105	1141	1144	1144	1134	1149	1164	1155	1158	1122	1132	1121	1136	1094	1071	1090	1117	1106	1124	1117	1148	1117	1123	1103	1118	1091	1115	1136	1098	1093	1105	1095	1133
254.97		1209	1142	1146	1160	1160	1136	1145	1213	1197	1169	1177	1154	1130	1146	1109	1118	1136	1154	1125	1137	1146	1184	1157	1152	1118	1138	1121	1138	1087	1079	1096	1128	1105	1114	1114	1146	1114	1136	1106	1126	1095	1114	1117	1107	1097	1113	1099	1132
255.97		1186	1135	1154	1151	1175	1136	1143	1211	1198	1146	1179	1157	1123	1136	1109	1110	1150	1151	1134	1140	1152	1182	1157	1156	1127	1128	1121	1134	1094	1072	1096	1121	1111	1113	1120	1142	1114	1129	1099	1133	1083	1112	1126	1110	1105	1100	1099	1128
256.97		1181	1128	1148	1173	1152	1144	1158	1193	1190	1156	1169	1162	1137	1146	1107	1100	1145	1148	1128	1127	1142	1177	1157	1156	1130	1129	1124	1147	1094	1082	1103	1113	1097	1110	1117	1139	1110	1127	1099	1127	1101	1126	1124	1103	1092	1101	1083	1123
257.97		1198	1131	1161	1170	1170	1137	1156	1209	1197	1152	1174	1155	1125	1155	1099	1110	1141	1162	1139	1128	1137	1173	1155	1150	1113	1125	1114	1142	1101	1065	1104	1120	1109	1114	1109	1133	1120	1139	1095	1117	1093	1118	1119	1103	1096	1100	1101	1132
258.97		1188	1116	1149	1170	1164	1133	1138	1208	1183	1164	1169	1164	1120	1146	1102	1097	1125	1147	1136	1127	1131	1173	1146	1150	1116	1138	1113	1149	1091	1069	1100	1121	1112	1116	1110	1129	1117	1127	1096	1120	1090	1118	1121	1100	1098	1100	1089	1139
259.97		1177	1131	1163	1165	1174	1137	1145	1216	1193	1144	1162	1152	1137	1134	1099	1096	1145	1160	1125	1128	1145	1174	1154	1143	1133	1129	1122	1160	1096	1071	1103	1120	1102	1113	1105	1139	1104	1130	1109	1124	1090	1117	1136	1113	1097	1102	1101	1131
260.97		1199	1121	1163	1148	1159	1144	1156	1208	1192	1154	1166	1170	1128	1146	1101	1104	1139	1131	1134	1137	1143	1180	1155	1147	1125	1129	1130	1147	1097	1084	1098	1119	1094	1107	1109	1137	1107	1134	1099	1124	1083	1104	1129	1098	1104	1096	1093	1139
261.97		1190	1109	1148	1156	1172	1147	1146	1211	1205	1154	1184	1149	1132	1143	1097	1102	1147	1137	1128	1136	1139	1185	1161	1141	1130	1123	1119	1139	1093	1069	1088	1115	1101	1112	1114	1125	1112	1132	1093	1128	1091	1111	1126	1098	1090	1093	1095	1128
262.97		1175	1125	1154	1160	1155	1141	1145	1214	1193	1164	1182	1152	1127	1134	1102	1096	1142	1148	1119	1133	1131	1170	1161	1149	1122	1134	1108	1147	1093	1069	1098	1109	1101	1112	1115	1142	1117	1127	1098	1139	1081	1107	1111	1109	1104	1094	1101	1128
263.97		1199	1126	1158	1160	1155	1126	1145	1204	1200	1151	1171	1155	1120	1139	1112	1108	1134	1145	1130	1118	1124	1156	1158	1128	1125	1135	1113	1141	1096	1069	1100	1123	1099	1110	1117	1142	1114	1113	1096	1111	1091	1114	1129	1107	1096	1101	1089	1113
264.97		1190	1126	1146	1170	1160	1128	1141	1204	1185	1159	1174	1155	1117	1138	1106	1100	1142	1151	1116	1125	1143	1168	1149	1135	1125	1126	1119	1141	1099	1072	1090	1115	1087	1113	1115	1124	1104	1133	1099	1118	1094	1104	1110	1105	1100	1094	1099	1132
265.97		1183	1135	1151	1155	1174	1136	1148	1199	1200	1146	1164	1159	1135	1136	1115	1115	1136	1148	1133	1127	1133	1176	1152	1143	1107	1140	1118	1138	1101	1078	1094	1112	1102	1119	1105	1129	1111	1119	1098	1120	1088	1120	1117	1092	1105	1092	1084	1129
266.97		1190	1135	1148	1153	1170	1134	1141	1206	1188	1138	1166	1142	1118	1136	1096	1102	1145	1137	1131	1124	1134	1171	1149	1132	1119	1125	1114	1138	1097	1063	1097	1113	1092	1109	1106	1133	1105	1126	1099	1130	1098	1104	1126	1095	1082	1093	1087	1131
267.97		1179	1128	1141	1155	1167	1131	1125	1208	1193	1147	1161	1142	1113	1146	1110	1099	1136	1150	1127	1140	1133	1171	1151	1147	1106	1119	1100	1139	1087	1076	1093	1115	1094	1120	1096	1139	1112	1141	1093	1127	1087	1107	1116	1092	1096	1101	1087	1125
268.97		1186	1142	1151	1146	1162	1136	1148	1211	1195	1138	1179	1147	1117	1129	1097	1094	1137	1154	1136	1125	1142	1173	1151	1134	1119	1132	1111	1139	1097	1078	1094	1119	1106	1121	1111	1133	1115	1124	1095	1121	1087	1099	1130	1110	1086	1094	1099	1128
269.97		1192	1123	1139	1160	1147	1126	1128	1193	1180	1142	1164	1160	1120	1136	1109	1097	1123	1150	1118	1119	1139	1177	1152	1140	1122	1122	1118	1139	1104	1076	1090	1108	1104	1121	1110	1126	1111	1122	1095	1106	1094	1108	1117	1107	1084	1094	1088	1117
270.97		1186	1128	1153	1155	1160	1144	1141	1208	1185	1147	1169	1154	1120	1129	1106	1094	1123	1153	1133	1128	1133	1164	1148	1144	1124	1125	1102	1134	1101	1078	1091	1108	1099	1123	1103	1133	1112	1123	1099	1120	1091	1107	1117	1098	1098	1102	1080	1127
271.97		1196	1152	1156	1165	1149	1136	1140	1198	1197	1149	1176	1152	1135	1150	1106	1108	1131	1153	1127	1118	1130	1174	1160	1143	1119	1132	1127	1138	1099	1069	1096	1115	1106	1116	1109	1139	1115	1140	1095	1136	1094	1117	1121	1096	1094	1100	1089	1125
272.97		1183	1121	1156	1160	1160	1124	1133	1189	1195	1151	1176	1139	1127	1132	1104	1102	1123	1154	1124	1130	1140	1173	1161	1144	1113	1117	1110	1136	1104	1081	1091	1119	1112	1099	1107	1129	1110	1124	1111	1114	1080	1111	1113	1102	1090	1100	1091	1115
273.97		1181	1120	1139	1158	1150	1134	1145	1203	1185	1154	1174	1152	1127	1152	1115	1107	1123	1148	1127	1128	1137	1170	1148	1146	1118	1131	1133	1157	1088	1073	1097	1115	1102	1110	1110	1126	1108	1134	1099	1134	1095	1108	1116	1103	1104	1096	1083	1137
274.97		1170	1126	1156	1153	1159	1128	1148	1209	1203	1151	1169	1149	1113	1127	1104	1105	1126	1154	1124	1142	1136	1162	1154	1138	1134	1128	1108	1120	1093	1063	1086	1119	1094	1109	1113	1140	1114	1136	1107	1114	1084	1101	1123	1106	1097	1101	1083	1127
275.97		1185	1125	1146	1163	1162	1134	1138	1203	1185	1161	1179	1159	1132	1145	1096	1099	1123	1150	1131	1125	1125	1165	1152	1144	1115	1116	1113	1139	1094	1078	1097	1098	1095	1112	1100	1129	1111	1120	1093	1121	1088	1109	1113	1098	1100	1101	1088	1139
276.97		1175	1128	1158	1150	1154	1144	1148	1203	1182	1159	1164	1139	1118	1127	1101	1100	1130	1142	1134	1127	1146	1168	1143	1140	1122	1126	1114	1134	1093	1062	1101	1113	1102	1114	1102	1135	1102	1132	1091	1121	1086	1093	1124	1093	1098	1093	1088	1123
277.97		1179	1131	1141	1161	1175	1119	1146	1206	1202	1157	1161	1144	1123	1139	1096	1099	1136	1147	1121	1121	1140	1167	1146	1150	1118	1117	1118	1144	1094	1071	1093	1108	1092	1106	1109	1129	1111	1117	1092	1106	1094	1111	1129	1096	1089	1097	1087	1117
278.97		1181	1123	1151	1151	1155	1126	1141	1194	1190	1156	1157	1149	1117	1130	1097	1100	1131	1137	1118	1127	1131	1167	1143	1138	1110	1122	1122	1139	1085	1060	1090	1115	1094	1106	1107	1131	1104	1127	1103	1120	1098	1109	1124	1100	1086	1098	1088	1113
279.97		1164	1120	1141	1156	1139	1136	1145	1198	1190	1131	1166	1157	1113	1141	1107	1104	1133	1148	1121	1121	1131	1167	1152	1137	1116	1119	1105	1138	1082	1065	1084	1115	1098	1114	1105	1137	1107	1116	1098	1120	1093	1099	1113	1088	1085	1098	1093	1123
280.97		1181	1130	1146	1165	1169	1139	1143	1198	1178	1146	1171	1159	1122	1138	1099	1105	1141	1145	1121	1137	1128	1165	1142	1150	1119	1132	1110	1131	1093	1071	1097	1109	1095	1106	1107	1121	1104	1126	1088	1127	1086	1102	1117	1109	1088	1096	1104	1128
281.97		1175	1131	1134	1161	1170	1128	1148	1194	1188	1149	1156	1134	1125	1138	1106	1099	1130	1144	1130	1125	1142	1162	1151	1141	1124	1125	1105	1128	1087	1069	1093	1105	1099	1105	1110	1131	1100	1120	1102	1128	1087	1114	1120	1102	1081	1104	1086	1133
282.97		1179	1138	1153	1145	1157	1128	1136	1203	1188	1138	1161	1147	1122	1130	1089	1108	1130	1137	1131	1125	1133	1162	1154	1150	1119	1117	1118	1120	1093	1076	1093	1110	1097	1113	1107	1128	1101	1123	1088	1111	1095	1104	1127	1103	1092	1090	1089	1121
283.97		1183	1133	1139	1139	1164	1139	1140	1209	1193	1144	1156	1139	1127	1139	1088	1099	1122	1142	1124	1115	1136	1177	1136	1155	1118	1131	1114	1152	1093	1069	1083	1112	1101	1109	1107	1128	1112	1129	1093	1123	1093	1112	1113	1109	1088	1084	1078	1124
284.97		1170	1125	1144	1156	1137	1131	1140	1199	1180	1138	1166	1137	1127	1132	1094	1100	1126	1142	1131	1113	1137	1147	1146	1144	1104	1120	1104	1130	1085	1072	1094	1108	1095	1110	1109	1132	1105	1130	1095	1116	1081	1105	1104	1099	1093	1086	1086	1124
285.97		1181	1128	1141	1151	1157	1128	1140	1188	1178	1141	1159	1150	1103	1123	1099	1094	1125	1145	1122	1118	1121	1158	1154	1134	1102	1119	1118	1133	1088	1065	1090	1108	1087	1106	1094	1128	1101	1129	1093	1117	1090	1102	1113	1106	1093	1096	1091	1129
286.97		1177	1125	1144	1155	1152	1121	1136	1201	1192	1142	1169	1144	1117	1132	1094	1096	1128	1140	1116	1122	1131	1156	1145	1138	1113	1114	1107	1130	1088	1063	1093	1113	1094	1117	1100	1129	1102	1120	1088	1123	1084	1098	1114	1100	1090	1089	1084	1117
287.97		1179	1121	1126	1146	1150	1126	1135	1188	1177	1146	1159	1150	1117	1115	1078	1085	1126	1130	1127	1130	1130	1155	1151	1147	1107	1117	1113	1125	1083	1060	1083	1124	1094	1106	1089	1118	1091	1120	1086	1114	1086	1109	1110	1092	1094	1089	1086	1113
288.97		1175	1120	1143	1145	1167	1115	1133	1198	1182	1149	1152	1135	1110	1129	1093	1100	1123	1139	1124	1124	1133	1152	1151	1135	1116	1114	1107	1136	1074	1068	1091	1109	1097	1109	1103	1126	1100	1117	1089	1096	1077	1098	1110	1098	1084	1098	1078	1111
289.97		1177	1123	1148	1153	1159	1129	1133	1186	1182	1134	1162	1150	1113	1132	1097	1097	1123	1137	1122	1130	1142	1171	1148	1135	1115	1134	1108	1133	1093	1065	1096	1097	1091	1103	1107	1133	1104	1124	1085	1120	1084	1102	1114	1095	1089	1098	1093	1127
290.97		1188	1113	1131	1158	1145	1128	1138	1203	1177	1142	1162	1135	1115	1134	1088	1075	1123	1142	1112	1134	1124	1162	1143	1141	1112	1117	1107	1118	1094	1063	1094	1113	1085	1114	1094	1125	1108	1124	1093	1121	1086	1098	1097	1096	1089	1102	1088	1131
291.97		1173	1113	1153	1153	1155	1128	1151	1201	1178	1138	1157	1142	1125	1123	1096	1086	1130	1136	1122	1122	1131	1156	1137	1137	1119	1117	1111	1118	1087	1068	1079	1112	1095	1121	1111	1124	1102	1123	1093	1121	1091	1102	1100	1093	1086	1085	1089	1120
292.97		1185	1137	1139	1146	1154	1128	1138	1194	1180	1146	1154	1150	1108	1138	1106	1104	1126	1139	1112	1125	1142	1171	1151	1137	1110	1122	1113	1138	1096	1062	1097	1110	1088	1109	1096	1131	1107	1122	1096	1120	1088	1096	1127	1103	1090	1092	1083	1125
293.97		1172	1120	1138	1158	1159	1136	1130	1196	1175	1146	1157	1147	1123	1130	1097	1091	1123	1145	1122	1122	1125	1165	1149	1140	1122	1134	1111	1123	1091	1063	1083	1116	1099	1114	1107	1125	1108	1127	1092	1120	1078	1093	1124	1096	1089	1093	1084	1125
294.97		1185	1126	1138	1148	1160	1134	1135	1196	1183	1136	1162	1149	1110	1136	1094	1097	1125	1142	1122	1131	1128	1152	1146	1143	1115	1123	1108	1126	1085	1079	1077	1113	1104	1116	1107	1117	1107	1120	1096	1111	1076	1092	1124	1100	1090	1100	1078	1127
295.97		1185	1113	1141	1148	1149	1116	1127	1188	1185	1147	1167	1137	1113	1132	1093	1091	1137	1147	1112	1124	1118	1158	1149	1153	1116	1120	1102	1138	1096	1072	1090	1110	1087	1113	1099	1122	1104	1126	1100	1120	1081	1104	1111	1095	1089	1097	1086	1124
296.97		1177	1126	1143	1150	1149	1116	1128	1198	1177	1138	1152	1139	1110	1127	1084	1083	1123	1130	1124	1127	1115	1159	1148	1126	1116	1114	1111	1130	1091	1056	1084	1110	1090	1113	1102	1125	1097	1120	1096	1111	1086	1093	1120	1095	1084	1081	1076	1116
297.97		1175	1125	1134	1161	1149	1119	1140	1191	1185	1141	1152	1132	1118	1130	1091	1108	1122	1134	1119	1122	1131	1170	1142	1137	1121	1128	1105	1131	1093	1063	1080	1103	1094	1110	1113	1125	1114	1129	1092	1118	1080	1102	1110	1098	1092	1101	1093	1117
[truncated: 232 more columns]

## Sheet: Figure 1D
Z-Score	Rank	Reverse rank (for sorting in figure)
4.09	1	12919	TMEM206
3.85	2	12918
3.06	3	12917
2.94	4	12916
2.84	5	12915
2.82	6	12914
2.78	7	12913
2.77	8	12912
2.75	9	12911
2.74	10	12910
2.73	11	12909
2.72	12	12908
2.7	13	12907
2.67	14	12906
2.61	15	12905
2.57	16	12904
2.57	17	12903
2.57	18	12902
2.55	19	12901
2.54	20	12900
2.54	21	12899
2.52	22	12898
2.45	23	12897
2.43	24	12896
2.43	25	12895
2.4	26	12894
2.39	27	12893
2.38	28	12892
2.38	29	12891
2.37	30	12890
2.37	31	12889
2.37	32	12888
2.37	33	12887
2.34	34	12886
2.32	35	12885
2.3	36	12884
2.29	37	12883
2.29	38	12882
2.28	39	12881
2.28	40	12880
2.28	41	12879
2.27	42	12878
2.26	43	12877
2.26	44	12876
2.25	45	12875
2.25	46	12874
2.23	47	12873
2.23	48	12872
2.23	49	12871
2.22	50	12870
2.21	51	12869
2.21	52	12868
2.2	53	12867
2.19	54	12866
2.19	55	12865
2.18	56	12864
2.18	57	12863
2.17	58	12862
2.16	59	12861
2.15	60	12860
2.14	61	12859
2.14	62	12858
2.13	63	12857
2.13	64	12856
2.13	65	12855
2.12	66	12854
2.12	67	12853
2.12	68	12852
2.11	69	12851
2.11	70	12850
2.09	71	12849
2.09	72	12848
2.08	73	12847
2.07	74	12846
2.06	75	12845
2.06	76	12844
2.05	77	12843
2.05	78	12842
2.05	79	12841
2.04	80	12840
2.04	81	12839
2.04	82	12838
2.03	83	12837
2.03	84	12836
2.02	85	12835
2.02	86	12834
2.02	87	12833
2.02	88	12832
2.02	89	12831
2.01	90	12830
2.01	91	12829
2.01	92	12828
2	93	12827
2	94	12826
1.99	95	12825
1.98	96	12824
1.98	97	12823
1.98	98	12822
1.97	99	12821
1.96	100	12820
1.96	101	12819
1.96	102	12818
1.95	103	12817
1.95	104	12816
1.95	105	12815
1.95	106	12814
1.94	107	12813
1.93	108	12812
1.92	109	12811
1.92	110	12810
1.92	111	12809
1.91	112	12808
1.91	113	12807
1.91	114	12806
1.91	115	12805
1.91	116	12804
1.9	117	12803
1.9	118	12802
1.9	119	12801
1.9	120	12800
1.9	121	12799
1.88	122	12798
1.88	123	12797
1.88	124	12796
1.87	125	12795
1.87	126	12794
1.87	127	12793
1.87	128	12792
1.85	129	12791
1.85	130	12790
1.84	131	12789
1.83	132	12788
1.83	133	12787
1.83	134	12786
1.83	135	12785
1.83	136	12784
1.83	137	12783
1.82	138	12782
1.82	139	12781
1.82	140	12780
1.81	141	12779
1.81	142	12778
1.81	143	12777
1.81	144	12776
1.81	145	12775
1.8	146	12774
1.8	147	12773
1.79	148	12772
1.79	149	12771
1.79	150	12770
1.79	151	12769
1.78	152	12768
1.78	153	12767
1.78	154	12766
1.77	155	12765
1.77	156	12764
1.77	157	12763
1.77	158	12762
1.77	159	12761
1.77	160	12760
1.76	161	12759
1.76	162	12758
1.75	163	12757
1.75	164	12756
1.75	165	12755
1.75	166	12754
1.74	167	12753
1.74	168	12752
1.74	169	12751
1.74	170	12750
1.74	171	12749
1.74	172	12748
1.74	173	12747
1.74	174	12746
1.73	175	12745
1.73	176	12744
1.73	177	12743
1.73	178	12742
1.73	179	12741
1.72	180	12740
1.72	181	12739
1.72	182	12738
1.71	183	12737
1.71	184	12736
1.71	185	12735
1.71	186	12734
1.7	187	12733
1.7	188	12732
1.7	189	12731
1.69	190	12730
1.69	191	12729
1.69	192	12728
1.69	193	12727
1.69	194	12726
1.68	195	12725
1.68	196	12724
1.68	197	12723
1.68	198	12722
1.68	199	12721
1.68	200	12720
1.68	201	12719
1.68	202	12718
1.68	203	12717
1.67	204	12716
1.67	205	12715
1.67	206	12714
1.67	207	12713
1.66	208	12712
1.66	209	12711
1.66	210	12710
1.66	211	12709
1.66	212	12708
1.66	213	12707
1.66	214	12706
1.66	215	12705
1.65	216	12704
1.65	217	12703
1.65	218	12702
1.65	219	12701
1.64	220	12700
1.64	221	12699
1.64	222	12698
1.63	223	12697
1.63	224	12696
1.63	225	12695
1.63	226	12694
1.62	227	12693
1.62	228	12692
1.62	229	12691
1.62	230	12690
1.62	231	12689
1.61	232	12688
1.61	233	12687
1.61	234	12686
1.61	235	12685
1.61	236	12684
1.61	237	12683
1.61	238	12682
1.6	239	12681
1.6	240	12680
1.6	241	12679
1.6	242	12678
1.6	243	12677
1.6	244	12676
1.6	245	12675
1.59	246	12674
1.59	247	12673
1.59	248	12672
1.59	249	12671
1.59	250	12670
1.59	251	12669
1.59	252	12668
1.58	253	12667
1.58	254	12666
1.58	255	12665
1.58	256	12664
1.57	257	12663
1.57	258	12662
1.57	259	12661
1.57	260	12660
1.57	261	12659
1.57	262	12658
1.56	263	12657
1.56	264	12656
1.56	265	12655
1.56	266	12654
1.56	267	12653
1.55	268	12652
1.55	269	12651
1.55	270	12650
1.54	271	12649
1.54	272	12648
1.54	273	12647
1.54	274	12646
1.54	275	12645
1.54	276	12644
1.54	277	12643
1.53	278	12642
1.53	279	12641
1.53	280	12640
1.53	281	12639
1.53	282	12638
1.53	283	12637
1.53	284	12636
1.53	285	12635
1.53	286	12634
1.53	287	12633
1.52	288	12632
1.52	289	12631
1.52	290	12630
1.52	291	12629
1.52	292	12628
1.52	293	12627
1.52	294	12626
1.51	295	12625
1.51	296	12624
1.51	297	12623
1.51	298	12622
1.51	299	12621
1.51	300	12620
1.51	301	12619
1.51	302	12618
1.5	303	12617
1.5	304	12616
1.5	305	12615
1.49	306	12614
1.49	307	12613
1.49	308	12612
1.49	309	12611
1.49	310	12610
1.48	311	12609
1.48	312	12608
1.48	313	12607
1.48	314	12606
1.47	315	12605
1.47	316	12604
1.47	317	12603
1.47	318	12602
1.47	319	12601
1.46	320	12600
1.46	321	12599
1.46	322	12598
1.46	323	12597
1.46	324	12596
1.46	325	12595
1.46	326	12594
1.46	327	12593
1.46	328	12592
1.46	329	12591
1.45	330	12590
1.45	331	12589
1.45	332	12588
1.45	333	12587
1.45	334	12586
1.45	335	12585
1.45	336	12584
1.45	337	12583
1.44	338	12582
1.44	339	12581
1.44	340	12580
1.44	341	12579
1.44	342	12578
1.44	343	12577
1.44	344	12576
1.44	345	12575
1.44	346	12574
1.44	347	12573
1.43	348	12572
1.43	349	12571
1.43	350	12570
1.43	351	12569
1.43	352	12568
1.42	353	12567
1.42	354	12566
1.42	355	12565
1.42	356	12564
1.42	357	12563
1.41	358	12562
1.41	359	12561
1.41	360	12560
1.41	361	12559
1.41	362	12558
1.41	363	12557
1.41	364	12556
1.41	365	12555
1.41	366	12554
1.41	367	12553
1.41	368	12552
1.41	369	12551
1.4	370	12550
1.4	371	12549
1.4	372	12548
1.4	373	12547
1.4	374	12546
1.4	375	12545
1.4	376	12544
1.4	377	12543
1.4	378	12542
1.4	379	12541
1.4	380	12540
1.39	381	12539
1.39	382	12538
1.39	383	12537
1.39	384	12536
1.39	385	12535
1.39	386	12534
1.39	387	12533
1.39	388	12532
1.39	389	12531
1.39	390	12530
1.38	391	12529
1.38	392	12528
1.38	393	12527
1.38	394	12526
1.38	395	12525
1.38	396	12524
1.38	397	12523
1.38	398	12522
1.38	399	12521
1.38	400	12520
1.38	401	12519
1.38	402	12518
1.38	403	12517
1.38	404	12516
1.38	405	12515
1.38	406	12514
1.38	407	12513
1.38	408	12512
1.38	409	12511
1.37	410	12510
1.37	411	12509
1.37	412	12508
1.37	413	12507
1.37	414	12506
1.37	415	12505
1.37	416	12504
1.37	417	12503
1.37	418	12502
1.37	419	12501
1.37	420	12500
1.37	421	12499
1.37	422	12498
1.36	423	12497
1.36	424	12496
1.36	425	12495
1.36	426	12494
1.36	427	12493
1.36	428	12492
1.36	429	12491
1.36	430	12490
1.36	431	12489
1.35	432	12488
1.35	433	12487
1.35	434	12486
1.35	435	12485
1.35	436	12484
1.35	437	12483
1.35	438	12482
1.35	439	12481
1.34	440	12480
1.34	441	12479
1.34	442	12478
1.34	443	12477
1.34	444	12476
1.33	445	12475
1.33	446	12474
1.33	447	12473
1.33	448	12472
1.33	449	12471
1.33	450	12470
1.33	451	12469
1.32	452	12468
1.32	453	12467
1.32	454	12466
1.32	455	12465
1.32	456	12464
1.32	457	12463
1.31	458	12462
1.31	459	12461
1.31	460	12460
1.31	461	12459
1.31	462	12458
1.31	463	12457
1.31	464	12456
1.31	465	12455
1.31	466	12454
1.3	467	12453
1.3	468	12452
1.3	469	12451
1.3	470	12450
1.3	471	12449
1.3	472	12448
1.3	473	12447
1.3	474	12446
1.3	475	12445
1.3	476	12444
1.3	477	12443
1.3	478	12442
1.3	479	12441
1.29	480	12440
1.29	481	12439
1.29	482	12438
1.29	483	12437
1.29	484	12436
1.29	485	12435
1.29	486	12434
1.29	487	12433
1.29	488	12432
1.28	489	12431
1.28	490	12430
1.28	491	12429
1.28	492	12428
1.28	493	12427
1.28	494	12426
1.28	495	12425
1.28	496	12424
1.28	497	12423
1.28	498	12422
1.28	499	12421
1.28	500	12420
1.28	501	12419
1.27	502	12418
1.27	503	12417
1.27	504	12416
1.27	505	12415
1.27	506	12414
1.27	507	12413
1.27	508	12412
1.27	509	12411
1.27	510	12410
1.27	511	12409
1.27	512	12408
1.27	513	12407
1.27	514	12406
1.27	515	12405
1.27	516	12404
1.26	517	12403
1.26	518	12402
1.26	519	12401
1.26	520	12400
1.26	521	12399
1.26	522	12398
1.26	523	12397
1.26	524	12396
1.26	525	12395
1.26	526	12394
1.26	527	12393
1.26	528	12392
1.26	529	12391
1.25	530	12390
1.25	531	12389
1.25	532	12388
1.25	533	12387
1.25	534	12386
1.25	535	12385
1.25	536	12384
1.25	537	12383
1.25	538	12382
1.25	539	12381
1.25	540	12380
1.25	541	12379
1.25	542	12378
1.25	543	12377
1.25	544	12376
1.25	545	12375
1.25	546	12374
1.25	547	12373
1.25	548	12372
1.24	549	12371
1.24	550	12370
1.24	551	12369
1.24	552	12368
1.24	553	12367
1.24	554	12366
1.24	555	12365
1.24	556	12364
1.24	557	12363
1.24	558	12362
1.24	559	12361
1.24	560	12360
1.24	561	12359
1.23	562	12358
1.23	563	12357
1.23	564	12356
1.23	565	12355
1.23	566	12354
1.23	567	12353
1.23	568	12352
1.23	569	12351
1.23	570	12350
1.23	571	12349
1.23	572	12348
1.23	573	12347
1.23	574	12346
1.23	575	12345
1.22	576	12344
1.22	577	12343
1.22	578	12342
1.22	579	12341
1.22	580	12340
1.22	581	12339
1.22	582	12338
1.22	583	12337
1.22	584	12336
1.22	585	12335
1.22	586	12334
1.22	587	12333
1.22	588	12332
1.21	589	12331
1.21	590	12330
1.21	591	12329
1.21	592	12328
1.21	593	12327
1.21	594	12326
1.21	595	12325
1.21	596	12324
1.21	597	12323
1.21	598	12322
1.21	599	12321
1.21	600	12320
1.21	601	12319
1.21	602	12318
1.21	603	12317
1.21	604	12316
1.21	605	12315
1.2	606	12314
1.2	607	12313
1.2	608	12312
1.2	609	12311
1.2	610	12310
1.2	611	12309
1.2	612	12308
1.2	613	12307
1.2	614	12306
1.2	615	12305
1.2	616	12304
1.2	617	12303
1.2	618	12302
1.2	619	12301
1.2	620	12300
1.2	621	12299
1.2	622	12298
1.2	623	12297
1.2	624	12296
1.19	625	12295
1.19	626	12294
1.19	627	12293
1.19	628	12292
1.19	629	12291
1.19	630	12290
1.19	631	12289
1.19	632	12288
1.19	633	12287
1.19	634	12286
1.19	635	12285
1.19	636	12284
1.19	637	12283
1.19	638	12282
1.19	639	12281
1.18	640	12280
1.18	641	12279
1.18	642	12278
1.18	643	12277
1.18	644	12276
1.18	645	12275
1.18	646	12274
1.17	647	12273
1.17	648	12272
1.17	649	12271
1.17	650	12270
1.17	651	12269
1.17	652	12268
1.17	653	12267
1.17	654	12266
1.17	655	12265
1.16	656	12264
1.16	657	12263
1.16	658	12262
1.16	659	12261
1.16	660	12260
1.16	661	12259
1.16	662	12258
1.16	663	12257
1.16	664	12256
1.16	665	12255
1.16	666	12254
1.16	667	12253
1.16	668	12252
1.16	669	12251
1.16	670	12250
1.16	671	12249
1.16	672	12248
1.15	673	12247
1.15	674	12246
1.15	675	12245
1.15	676	12244
1.15	677	12243
1.15	678	12242
1.15	679	12241
1.15	680	12240
1.15	681	12239
1.15	682	12238
1.15	683	12237
1.15	684	12236
1.15	685	12235
1.15	686	12234
1.15	687	12233
1.15	688	12232
1.15	689	12231
1.15	690	12230
1.15	691	12229
1.14	692	12228
1.14	693	12227
1.14	694	12226
1.14	695	12225
1.14	696	12224
1.14	697	12223
1.14	698	12222
1.14	699	12221
1.13	700	12220
1.13	701	12219
1.13	702	12218
1.13	703	12217
1.13	704	12216
1.13	705	12215
1.13	706	12214
1.13	707	12213
1.13	708	12212
1.13	709	12211
1.13	710	12210
1.13	711	12209
1.13	712	12208
1.13	713	12207
1.13	714	12206
1.13	715	12205
1.13	716	12204
1.13	717	12203
1.12	718	12202
1.12	719	12201
1.12	720	12200
1.12	721	12199
1.12	722	12198
1.12	723	12197
1.12	724	12196
1.12	725	12195
1.12	726	12194
1.12	727	12193
1.12	728	12192
1.12	729	12191
1.12	730	12190
1.12	731	12189
1.12	732	12188
1.12	733	12187
1.11	734	12186
1.11	735	12185
1.11	736	12184
1.11	737	12183
1.11	738	12182
1.11	739	12181
1.11	740	12180
1.11	741	12179
1.11	742	12178
1.11	743	12177
1.11	744	12176
1.11	745	12175
1.11	746	12174
1.11	747	12173
1.11	748	12172
1.11	749	12171
1.11	750	12170
1.11	751	12169
1.11	752	12168
1.11	753	12167
1.1	754	12166
1.1	755	12165
1.1	756	12164
1.1	757	12163
1.1	758	12162
1.1	759	12161
1.1	760	12160
1.1	761	12159
1.1	762	12158
1.1	763	12157
1.1	764	12156
1.1	765	12155
1.1	766	12154
1.1	767	12153
1.1	768	12152
1.1	769	12151
1.1	770	12150
1.1	771	12149
1.1	772	12148
1.1	773	12147
1.1	774	12146
1.1	775	12145
1.1	776	12144
1.09	777	12143
1.09	778	12142
1.09	779	12141
1.09	780	12140
1.09	781	12139
1.09	782	12138
1.09	783	12137
1.09	784	12136
1.09	785	12135
1.09	786	12134
1.09	787	12133
1.09	788	12132
1.09	789	12131
1.09	790	12130
1.09	791	12129
1.09	792	12128
1.09	793	12127
1.09	794	12126
1.09	795	12125
1.09	796	12124
1.09	797	12123
1.09	798	12122
1.09	799	12121
1.09	800	12120
1.09	801	12119
1.09	802	12118
1.08	803	12117
1.08	804	12116
1.08	805	12115
1.08	806	12114
1.08	807	12113
1.08	808	12112
1.08	809	12111
1.08	810	12110
1.08	811	12109
1.08	812	12108
1.08	813	12107
1.08	814	12106
1.08	815	12105
1.08	816	12104
1.08	817	12103
1.08	818	12102
1.08	819	12101
1.07	820	12100
1.07	821	12099
1.07	822	12098
1.07	823	12097
1.07	824	12096
1.07	825	12095
1.07	826	12094
1.07	827	12093
1.07	828	12092
1.07	829	12091
1.07	830	12090
1.07	831	12089
1.07	832	12088
1.07	833	12087
1.07	834	12086
1.07	835	12085
1.07	836	12084
1.07	837	12083
1.07	838	12082
1.07	839	12081
1.07	840	12080
1.07	841	12079
1.07	842	12078
1.07	843	12077
1.06	844	12076
1.06	845	12075
1.06	846	12074
1.06	847	12073
1.06	848	12072
1.06	849	12071
1.06	850	12070
1.06	851	12069
1.06	852	12068
1.06	853	12067
1.06	854	12066
1.06	855	12065
1.06	856	12064
1.05	857	12063
1.05	858	12062
1.05	859	12061
1.05	860	12060
1.05	861	12059
1.05	862	12058
1.05	863	12057
1.05	864	12056
1.05	865	12055
1.05	866	12054
1.05	867	12053
1.05	868	12052
1.05	869	12051
1.05	870	12050
1.05	871	12049
1.05	872	12048
1.05	873	12047
1.05	874	12046
1.05	875	12045
1.05	876	12044
1.04	877	12043
1.04	878	12042
1.04	879	12041
1.04	880	12040
1.04	881	12039
1.04	882	12038
1.04	883	12037
1.04	884	12036
1.04	885	12035
1.04	886	12034
1.04	887	12033
1.04	888	12032
1.04	889	12031
1.04	890	12030
1.04	891	12029
1.04	892	12028
1.04	893	12027
1.04	894	12026
1.04	895	12025
1.04	896	12024
1.04	897	12023
1.04	898	12022
1.04	899	12021
1.04	900	12020
1.04	901	12019
1.03	902	12018
1.03	903	12017
1.03	904	12016
1.03	905	12015
1.03	906	12014
1.03	907	12013
1.03	908	12012
1.03	909	12011
1.03	910	12010
1.03	911	12009
1.03	912	12008
1.03	913	12007
1.03	914	12006
1.03	915	12005
1.03	916	12004
1.03	917	12003
1.03	918	12002
1.03	919	12001
1.03	920	12000
1.02	921	11999
1.02	922	11998
1.02	923	11997
1.02	924	11996
1.02	925	11995
1.02	926	11994
1.02	927	11993
1.02	928	11992
1.02	929	11991
1.02	930	11990
1.02	931	11989
1.02	932	11988
1.02	933	11987
1.02	934	11986
1.02	935	11985
1.02	936	11984
1.02	937	11983
1.02	938	11982
1.02	939	11981
1.02	940	11980
1.02	941	11979
1.02	942	11978
1.01	943	11977
1.01	944	11976
1.01	945	11975
1.01	946	11974
1.01	947	11973
1.01	948	11972
1.01	949	11971
1.01	950	11970
1.01	951	11969
1.01	952	11968
1.01	953	11967
1.01	954	11966
1.01	955	11965
1.01	956	11964
1.01	957	11963
1.01	958	11962
1.01	959	11961
1.01	960	11960
1.01	961	11959
1.01	962	11958
1	963	11957
1	964	11956
1	965	11955
1	966	11954
1	967	11953
1	968	11952
1	969	11951
1	970	11950
1	971	11949
1	972	11948
1	973	11947
1	974	11946
1	975	11945
0.99	976	11944
0.99	977	11943
0.99	978	11942
0.99	979	11941
0.99	980	11940
0.99	981	11939
0.99	982	11938
0.99	983	11937
0.99	984	11936
0.99	985	11935
0.99	986	11934
0.99	987	11933
0.99	988	11932
0.99	989	11931
0.99	990	11930
0.99	991	11929
0.98	992	11928
0.98	993	11927
0.98	994	11926
0.98	995	11925
0.98	996	11924
0.98	997	11923
0.98	998	11922
0.98	999	11921
0.98	1000	11920
0.98	1001	11919
0.98	1002	11918
0.98	1003	11917
0.98	1004	11916
0.98	1005	11915
0.98	1006	11914
0.98	1007	11913
0.98	1008	11912
0.98	1009	11911
0.98	1010	11910
0.98	1011	11909
0.98	1012	11908
0.98	1013	11907
0.98	1014	11906
0.98	1015	11905
0.98	1016	11904
0.98	1017	11903
0.98	1018	11902
0.97	1019	11901
0.97	1020	11900
0.97	1021	11899
0.97	1022	11898
0.97	1023	11897
0.97	1024	11896
0.97	1025	11895
0.97	1026	11894
0.97	1027	11893
0.97	1028	11892
0.97	1029	11891
0.97	1030	11890
0.97	1031	11889
0.97	1032	11888
0.97	1033	11887
0.97	1034	11886
0.96	1035	11885
0.96	1036	11884
0.96	1037	11883
0.96	1038	11882
0.96	1039	11881
0.96	1040	11880
0.96	1041	11879
0.96	1042	11878
0.96	1043	11877
0.96	1044	11876
0.96	1045	11875
0.96	1046	11874
0.96	1047	11873
0.96	1048	11872
0.96	1049	11871
0.96	1050	11870
0.96	1051	11869
0.96	1052	11868
0.96	1053	11867
0.96	1054	11866
0.96	1055	11865
0.96	1056	11864
0.96	1057	11863
0.95	1058	11862
0.95	1059	11861
0.95	1060	11860
0.95	1061	11859
0.95	1062	11858
0.95	1063	11857
0.95	1064	11856
0.95	1065	11855
0.95	1066	11854
0.95	1067	11853
0.95	1068	11852
0.95	1069	11851
0.95	1070	11850
0.95	1071	11849
0.95	1072	11848
0.95	1073	11847
0.95	1074	11846
0.95	1075	11845
0.95	1076	11844
0.94	1077	11843
0.94	1078	11842
0.94	1079	11841
0.94	1080	11840
0.94	1081	11839
0.94	1082	11838
0.94	1083	11837
0.94	1084	11836
0.94	1085	11835
0.94	1086	11834
0.94	1087	11833
0.94	1088	11832
0.94	1089	11831
0.94	1090	11830
0.94	1091	11829
0.94	1092	11828
0.94	1093	11827
0.94	1094	11826
0.94	1095	11825
0.94	1096	11824
0.94	1097	11823
0.94	1098	11822
0.94	1099	11821
0.93	1100	11820
0.93	1101	11819
0.93	1102	11818
0.93	1103	11817
0.93	1104	11816
0.93	1105	11815
0.93	1106	11814
0.93	1107	11813
0.93	1108	11812
0.93	1109	11811
0.93	1110	11810
0.93	1111	11809
0.93	1112	11808
0.93	1113	11807
0.93	1114	11806
0.93	1115	11805
0.93	1116	11804
0.93	1117	11803
0.93	1118	11802
0.93	1119	11801
0.93	1120	11800
0.93	1121	11799
0.93	1122	11798
0.93	1123	11797
0.93	1124	11796
0.93	1125	11795
0.92	1126	11794
0.92	1127	11793
0.92	1128	11792
0.92	1129	11791
0.92	1130	11790
0.92	1131	11789
0.92	1132	11788
0.92	1133	11787
0.92	1134	11786
0.92	1135	11785
0.92	1136	11784
0.92	1137	11783
0.92	1138	11782
0.92	1139	11781
0.92	1140	11780
0.92	1141	11779
0.92	1142	11778
0.92	1143	11777
0.92	1144	11776
0.92	1145	11775
0.92	1146	11774
0.92	1147	11773
0.92	1148	11772
0.92	1149	11771
0.91	1150	11770
0.91	1151	11769
0.91	1152	11768
0.91	1153	11767
0.91	1154	11766
0.91	1155	11765
0.91	1156	11764
0.91	1157	11763
0.91	1158	11762
0.91	1159	11761
0.91	1160	11760
0.91	1161	11759
0.91	1162	11758
0.91	1163	11757
0.91	1164	11756
0.91	1165	11755
0.91	1166	11754
0.91	1167	11753
0.91	1168	11752
0.91	1169	11751
0.91	1170	11750
0.91	1171	11749
0.91	1172	11748
0.9	1173	11747
0.9	1174	11746
0.9	1175	11745
0.9	1176	11744
0.9	1177	11743
0.9	1178	11742
0.9	1179	11741
0.9	1180	11740
0.9	1181	11739
0.9	1182	11738
0.9	1183	11737
0.9	1184	11736
0.9	1185	11735
0.9	1186	11734
0.9	1187	11733
0.9	1188	11732
0.9	1189	11731
0.9	1190	11730
0.9	1191	11729
0.9	1192	11728
0.9	1193	11727
0.9	1194	11726
0.9	1195	11725
0.9	1196	11724
0.9	1197	11723
0.9	1198	11722
0.9	1199	11721
0.89	1200	11720
0.89	1201	11719
0.89	1202	11718
0.89	1203	11717
0.89	1204	11716
0.89	1205	11715
0.89	1206	11714
0.89	1207	11713
0.89	1208	11712
0.89	1209	11711
0.89	1210	11710
0.89	1211	11709
0.89	1212	11708
0.89	1213	11707
0.89	1214	11706
0.89	1215	11705
0.89	1216	11704
0.89	1217	11703
0.89	1218	11702
0.89	1219	11701
0.89	1220	11700
0.89	1221	11699
0.89	1222	11698
0.88	1223	11697
0.88	1224	11696
0.88	1225	11695
0.88	1226	11694
0.88	1227	11693
0.88	1228	11692
0.88	1229	11691
0.88	1230	11690
0.88	1231	11689
0.88	1232	11688
0.88	1233	11687
0.88	1234	11686
0.88	1235	11685
0.88	1236	11684
0.88	1237	11683
0.88	1238	11682
0.88	1239	11681
0.88	1240	11680
0.88	1241	11679
0.88	1242	11678
0.88	1243	11677
0.88	1244	11676
0.88	1245	11675
0.88	1246	11674
0.88	1247	11673
0.88	1248	11672
0.88	1249	11671
0.88	1250	11670
0.87	1251	11669
0.87	1252	11668
0.87	1253	11667
0.87	1254	11666
0.87	1255	11665
0.87	1256	11664
0.87	1257	11663
0.87	1258	11662
0.87	1259	11661
0.87	1260	11660
0.87	1261	11659
0.87	1262	11658
0.87	1263	11657
0.87	1264	11656
0.87	1265	11655
0.87	1266	11654
0.87	1267	11653
0.87	1268	11652
0.87	1269	11651
0.87	1270	11650
0.87	1271	11649
0.87	1272	11648
0.87	1273	11647
0.87	1274	11646
0.87	1275	11645
0.86	1276	11644
0.86	1277	11643
0.86	1278	11642
0.86	1279	11641
0.86	1280	11640
0.86	1281	11639
0.86	1282	11638
0.86	1283	11637
0.86	1284	11636
0.86	1285	11635
0.86	1286	11634
0.86	1287	11633
0.86	1288	11632
0.86	1289	11631
0.86	1290	11630
0.86	1291	11629
0.86	1292	11628
0.86	1293	11627
0.86	1294	11626
0.86	1295	11625
0.86	1296	11624
0.86	1297	11623
0.86	1298	11622
0.86	1299	11621
0.86	1300	11620
0.86	1301	11619
0.85	1302	11618
0.85	1303	11617
0.85	1304	11616
0.85	1305	11615
0.85	1306	11614
0.85	1307	11613
0.85	1308	11612
0.85	1309	11611
0.85	1310	11610
0.85	1311	11609
0.85	1312	11608
0.85	1313	11607
0.85	1314	11606
0.85	1315	11605
0.85	1316	11604
0.85	1317	11603
0.85	1318	11602
0.85	1319	11601
0.85	1320	11600
0.85	1321	11599
0.85	1322	11598
0.85	1323	11597
0.85	1324	11596
0.84	1325	11595
0.84	1326	11594
0.84	1327	11593
0.84	1328	11592
0.84	1329	11591
0.84	1330	11590
0.84	1331	11589
0.84	1332	11588
0.84	1333	11587
0.84	1334	11586
0.84	1335	11585
0.84	1336	11584
0.84	1337	11583
0.84	1338	11582
0.84	1339	11581
0.84	1340	11580
0.84	1341	11579
0.84	1342	11578
0.84	1343	11577
0.84	1344	11576
0.84	1345	11575
0.84	1346	11574
0.84	1347	11573
0.83	1348	11572
0.83	1349	11571
0.83	1350	11570
0.83	1351	11569
0.83	1352	11568
0.83	1353	11567
0.83	1354	11566
0.83	1355	11565
0.83	1356	11564
0.83	1357	11563
0.83	1358	11562
0.83	1359	11561
0.83	1360	11560
0.83	1361	11559
0.83	1362	11558
0.83	1363	11557
0.83	1364	11556
0.83	1365	11555
0.83	1366	11554
0.83	1367	11553
0.83	1368	11552
0.83	1369	11551
0.82	1370	11550
0.82	1371	11549
0.82	1372	11548
0.82	1373	11547
0.82	1374	11546
0.82	1375	11545
0.82	1376	11544
0.82	1377	11543
0.82	1378	11542
0.82	1379	11541
0.82	1380	11540
0.82	1381	11539
0.82	1382	11538
0.82	1383	11537
0.82	1384	11536
0.82	1385	11535
0.82	1386	11534
0.82	1387	11533
0.82	1388	11532
0.82	1389	11531
0.82	1390	11530
0.82	1391	11529
0.82	1392	11528
0.82	1393	11527
0.82	1394	11526
0.82	1395	11525
0.82	1396	11524
0.82	1397	11523
0.82	1398	11522
0.82	1399	11521
0.82	1400	11520
0.82	1401	11519
0.82	1402	11518
0.82	1403	11517
0.82	1404	11516
0.82	1405	11515
0.82	1406	11514
0.82	1407	11513
0.81	1408	11512
0.81	1409	11511
0.81	1410	11510
0.81	1411	11509
0.81	1412	11508
0.81	1413	11507
0.81	1414	11506
0.81	1415	11505
0.81	1416	11504
0.81	1417	11503
0.81	1418	11502
0.81	1419	11501
0.81	1420	11500
0.81	1421	11499
0.81	1422	11498
0.81	1423	11497
0.81	1424	11496
0.81	1425	11495
0.81	1426	11494
0.81	1427	11493
0.81	1428	11492
0.8	1429	11491
0.8	1430	11490
0.8	1431	11489
0.8	1432	11488
0.8	1433	11487
0.8	1434	11486
0.8	1435	11485
0.8	1436	11484
0.8	1437	11483
0.8	1438	11482
0.8	1439	11481
0.8	1440	11480
0.8	1441	11479
0.8	1442	11478
0.8	1443	11477
0.8	1444	11476
0.8	1445	11475
0.8	1446	11474
0.8	1447	11473
0.8	1448	11472
0.8	1449	11471
0.8	1450	11470
0.8	1451	11469
0.8	1452	11468
0.8	1453	11467
0.8	1454	11466
0.79	1455	11465
0.79	1456	11464
0.79	1457	11463
0.79	1458	11462
0.79	1459	11461
0.79	1460	11460
0.79	1461	11459
0.79	1462	11458
0.79	1463	11457
0.79	1464	11456
0.79	1465	11455
0.79	1466	11454
0.79	1467	11453
0.79	1468	11452
0.79	1469	11451
0.79	1470	11450
0.79	1471	11449
0.79	1472	11448
0.79	1473	11447
0.79	1474	11446
0.79	1475	11445
0.79	1476	11444
0.78	1477	11443
0.78	1478	11442
0.78	1479	11441
0.78	1480	11440
0.78	1481	11439
0.78	1482	11438
0.78	1483	11437
0.78	1484	11436
0.78	1485	11435
0.78	1486	11434
0.78	1487	11433
0.78	1488	11432
0.78	1489	11431
0.78	1490	11430
0.78	1491	11429
0.78	1492	11428
0.78	1493	11427
0.78	1494	11426
0.78	1495	11425
0.78	1496	11424
0.78	1497	11423
0.78	1498	11422
0.78	1499	11421
0.78	1500	11420
0.78	1501	11419
0.78	1502	11418
0.78	1503	11417
0.78	1504	11416
0.78	1505	11415
0.78	1506	11414
0.78	1507	11413
0.78	1508	11412
0.78	1509	11411
0.78	1510	11410
0.78	1511	11409
0.77	1512	11408
0.77	1513	11407
0.77	1514	11406
0.77	1515	11405
0.77	1516	11404
0.77	1517	11403
0.77	1518	11402
0.77	1519	11401
0.77	1520	11400
0.77	1521	11399
0.77	1522	11398
0.77	1523	11397
0.77	1524	11396
0.77	1525	11395
0.77	1526	11394
0.77	1527	11393
0.77	1528	11392
0.77	1529	11391
0.77	1530	11390
0.77	1531	11389
0.77	1532	11388
0.77	1533	11387
0.77	1534	11386
0.77	1535	11385
0.77	1536	11384
0.77	1537	11383
0.77	1538	11382
0.77	1539	11381
0.77	1540	11380
0.77	1541	11379
0.77	1542	11378
0.77	1543	11377
0.77	1544	11376
0.77	1545	11375
0.76	1546	11374
0.76	1547	11373
0.76	1548	11372
0.76	1549	11371
0.76	1550	11370
0.76	1551	11369
0.76	1552	11368
0.76	1553	11367
0.76	1554	11366
0.76	1555	11365
0.76	1556	11364
0.76	1557	11363
0.76	1558	11362
0.76	1559	11361
0.76	1560	11360
0.76	1561	11359
0.76	1562	11358
0.76	1563	11357
0.76	1564	11356
0.76	1565	11355
0.76	1566	11354
0.76	1567	11353
0.76	1568	11352
0.76	1569	11351
0.76	1570	11350
0.76	1571	11349
0.76	1572	11348
0.76	1573	11347
0.76	1574	11346
0.75	1575	11345
0.75	1576	11344
0.75	1577	11343
0.75	1578	11342
0.75	1579	11341
0.75	1580	11340
0.75	1581	11339
0.75	1582	11338
0.75	1583	11337
0.75	1584	11336
0.75	1585	11335
0.75	1586	11334
0.75	1587	11333
0.75	1588	11332
0.75	1589	11331
0.75	1590	11330
0.75	1591	11329
0.75	1592	11328
0.75	1593	11327
0.75	1594	11326
0.75	1595	11325
0.75	1596	11324
0.75	1597	11323
0.75	1598	11322
0.75	1599	11321
0.75	1600	11320
0.75	1601	11319
0.75	1602	11318
0.75	1603	11317
0.74	1604	11316
0.74	1605	11315
0.74	1606	11314
0.74	1607	11313
0.74	1608	11312
0.74	1609	11311
0.74	1610	11310
0.74	1611	11309
0.74	1612	11308
0.74	1613	11307
0.74	1614	11306
0.74	1615	11305
0.74	1616	11304
0.74	1617	11303
0.74	1618	11302
0.74	1619	11301
0.74	1620	11300
0.74	1621	11299
0.74	1622	11298
0.74	1623	11297
0.74	1624	11296
0.74	1625	11295
0.74	1626	11294
0.74	1627	11293
0.74	1628	11292
0.74	1629	11291
0.74	1630	11290
0.74	1631	11289
0.74	1632	11288
0.74	1633	11287
0.74	1634	11286
0.74	1635	11285
0.74	1636	11284
0.74	1637	11283
0.74	1638	11282
0.74	1639	11281
0.74	1640	11280
0.73	1641	11279
0.73	1642	11278
0.73	1643	11277
0.73	1644	11276
0.73	1645	11275
0.73	1646	11274
0.73	1647	11273
0.73	1648	11272
0.73	1649	11271
0.73	1650	11270
0.73	1651	11269
0.73	1652	11268
0.73	1653	11267
0.73	1654	11266
0.73	1655	11265
0.73	1656	11264
0.73	1657	11263
0.73	1658	11262
0.73	1659	11261
0.73	1660	11260
0.73	1661	11259
0.73	1662	11258
0.73	1663	11257
0.73	1664	11256
0.73	1665	11255
0.73	1666	11254
0.72	1667	11253
0.72	1668	11252
0.72	1669	11251
0.72	1670	11250
0.72	1671	11249
0.72	1672	11248
0.72	1673	11247
0.72	1674	11246
0.72	1675	11245
0.72	1676	11244
0.72	1677	11243
0.72	1678	11242
0.72	1679	11241
0.72	1680	11240
0.72	1681	11239
0.72	1682	11238
0.72	1683	11237
0.72	1684	11236
0.72	1685	11235
0.72	1686	11234
0.72	1687	11233
0.72	1688	11232
0.72	1689	11231
0.72	1690	11230
0.72	1691	11229
0.72	1692	11228
0.72	1693	11227
0.71	1694	11226
0.71	1695	11225
0.71	1696	11224
0.71	1697	11223
0.71	1698	11222
0.71	1699	11221
0.71	1700	11220
0.71	1701	11219
0.71	1702	11218
0.71	1703	11217
0.71	1704	11216
0.71	1705	11215
0.71	1706	11214
0.71	1707	11213
0.71	1708	11212
0.71	1709	11211
0.71	1710	11210
0.71	1711	11209
0.71	1712	11208
0.71	1713	11207
0.71	1714	11206
0.71	1715	11205
0.71	1716	11204
0.71	1717	11203
0.71	1718	11202
0.71	1719	11201
0.71	1720	11200
0.71	1721	11199
0.71	1722	11198
0.71	1723	11197
0.71	1724	11196
0.71	1725	11195
0.71	1726	11194
0.7	1727	11193
0.7	1728	11192
0.7	1729	11191
0.7	1730	11190
0.7	1731	11189
0.7	1732	11188
0.7	1733	11187
0.7	1734	11186
0.7	1735	11185
0.7	1736	11184
0.7	1737	11183
0.7	1738	11182
0.7	1739	11181
0.7	1740	11180
0.7	1741	11179
0.7	1742	11178
0.7	1743	11177
0.7	1744	11176
0.7	1745	11175
0.7	1746	11174
0.7	1747	11173
0.7	1748	11172
0.7	1749	11171
0.7	1750	11170
0.7	1751	11169
0.7	1752	11168
0.7	1753	11167
0.7	1754	11166
0.7	1755	11165
0.7	1756	11164
0.7	1757	11163
0.7	1758	11162
0.7	1759	11161
0.7	1760	11160
0.7	1761	11159
0.7	1762	11158
0.7	1763	11157
0.69	1764	11156
0.69	1765	11155
0.69	1766	11154
0.69	1767	11153
0.69	1768	11152
0.69	1769	11151
0.69	1770	11150
0.69	1771	11149
0.69	1772	11148
0.69	1773	11147
0.69	1774	11146
0.69	1775	11145
0.69	1776	11144
0.69	1777	11143
0.69	1778	11142
0.69	1779	11141
0.69	1780	11140
0.69	1781	11139
0.69	1782	11138
0.69	1783	11137
0.69	1784	11136
0.69	1785	11135
0.69	1786	11134
0.69	1787	11133
0.69	1788	11132
0.69	1789	11131
0.69	1790	11130
0.69	1791	11129
0.69	1792	11128
0.69	1793	11127
0.69	1794	11126
0.69	1795	11125
0.69	1796	11124
0.69	1797	11123
0.69	1798	11122
0.69	1799	11121
0.68	1800	11120
0.68	1801	11119
0.68	1802	11118
0.68	1803	11117
0.68	1804	11116
0.68	1805	11115
0.68	1806	11114
0.68	1807	11113
0.68	1808	11112
0.68	1809	11111
0.68	1810	11110
0.68	1811	11109
0.68	1812	11108
0.68	1813	11107
0.68	1814	11106
0.68	1815	11105
0.68	1816	11104
0.68	1817	11103
0.68	1818	11102
0.68	1819	11101
0.68	1820	11100
0.68	1821	11099
0.68	1822	11098
0.68	1823	11097
0.68	1824	11096
0.68	1825	11095
0.68	1826	11094
0.68	1827	11093
0.68	1828	11092
0.68	1829	11091
0.68	1830	11090
0.68	1831	11089
0.68	1832	11088
0.68	1833	11087
0.68	1834	11086
0.68	1835	11085
0.68	1836	11084
0.68	1837	11083
0.68	1838	11082
0.68	1839	11081
0.68	1840	11080
0.68	1841	11079
0.68	1842	11078
0.68	1843	11077
0.68	1844	11076
0.68	1845	11075
0.67	1846	11074
0.67	1847	11073
0.67	1848	11072
0.67	1849	11071
0.67	1850	11070
0.67	1851	11069
0.67	1852	11068
0.67	1853	11067
0.67	1854	11066
0.67	1855	11065
0.67	1856	11064
0.67	1857	11063
0.67	1858	11062
0.67	1859	11061
0.67	1860	11060
0.67	1861	11059
0.67	1862	11058
0.67	1863	11057
0.67	1864	11056
0.67	1865	11055
0.67	1866	11054
0.67	1867	11053
0.67	1868	11052
0.67	1869	11051
0.67	1870	11050
0.67	1871	11049
0.67	1872	11048
0.67	1873	11047
0.67	1874	11046
0.67	1875	11045
0.67	1876	11044
0.67	1877	11043
0.67	1878	11042
0.67	1879	11041
0.67	1880	11040
0.67	1881	11039
0.67	1882	11038
0.67	1883	11037
0.67	1884	11036
0.67	1885	11035
0.67	1886	11034
0.67	1887	11033
0.67	1888	11032
0.67	1889	11031
0.67	1890	11030
0.67	1891	11029
0.67	1892	11028
0.67	1893	11027
0.66	1894	11026
0.66	1895	11025
0.66	1896	11024
0.66	1897	11023
0.66	1898	11022
0.66	1899	11021
0.66	1900	11020
0.66	1901	11019
0.66	1902	11018
0.66	1903	11017
0.66	1904	11016
0.66	1905	11015
0.66	1906	11014
0.66	1907	11013
0.66	1908	11012
0.66	1909	11011
0.66	1910	11010
0.66	1911	11009
0.66	1912	11008
0.66	1913	11007
0.66	1914	11006
0.65	1915	11005
0.65	1916	11004
0.65	1917	11003
0.65	1918	11002
0.65	1919	11001
0.65	1920	11000
0.65	1921	10999
0.65	1922	10998
0.65	1923	10997
0.65	1924	10996
0.65	1925	10995
0.65	1926	10994
0.65	1927	10993
0.65	1928	10992
0.65	1929	10991
0.65	1930	10990
0.65	1931	10989
0.65	1932	10988
0.65	1933	10987
0.65	1934	10986
0.65	1935	10985
0.65	1936	10984
0.65	1937	10983
0.65	1938	10982
0.65	1939	10981
0.65	1940	10980
0.65	1941	10979
0.65	1942	10978
0.65	1943	10977
0.65	1944	10976
0.65	1945	10975
0.65	1946	10974
0.65	1947	10973
0.65	1948	10972
0.65	1949	10971
0.65	1950	10970
0.65	1951	10969
0.64	1952	10968
0.64	1953	10967
0.64	1954	10966
0.64	1955	10965
0.64	1956	10964
0.64	1957	10963
0.64	1958	10962
0.64	1959	10961
0.64	1960	10960
0.64	1961	10959
0.64	1962	10958
0.64	1963	10957
0.64	1964	10956
0.64	1965	10955
0.64	1966	10954
0.64	1967	10953
0.64	1968	10952
0.64	1969	10951
0.64	1970	10950
0.64	1971	10949
0.64	1972	10948
0.64	1973	10947
0.64	1974	10946
0.64	1975	10945
0.64	1976	10944
0.64	1977	10943
0.64	1978	10942
0.64	1979	10941
0.64	1980	10940
0.64	1981	10939
0.64	1982	10938
0.63	1983	10937
0.63	1984	10936
0.63	1985	10935
0.63	1986	10934
0.63	1987	10933
0.63	1988	10932
0.63	1989	10931
0.63	1990	10930
0.63	1991	10929
0.63	1992	10928
0.63	1993	10927
0.63	1994	10926
0.63	1995	10925
0.63	1996	10924
0.63	1997	10923
0.63	1998	10922
0.63	1999	10921
[truncated: 10,920 more rows]
