# Supplementary material for: Identification of TMEM206 proteins as pore of PAORAC/ASOR acid-sensitive chloride channels
Source: eLife. 2019 Jul 18;8:e49187. doi: 10.7554/eLife.49187 (PMC6663466; doi:10.7554/eLife.49187)
Supplement: Figure 3—source data 1. [file elife-49187-fig3-data1.xlsx]

## Sheet: Fig. 3A
Values are currents in Ampere in response to rectangular pulses to the indicated voltages.
	WT HEK293 cell									WT HEK cell overexpressing TMEM206
Time (s)	-80 mV	-60 mV	-40 mV	-20 mV	0 mV	20 mV	40 mV	60 mV	80 mV	-80 mV	-60 mV	-40 mV	-20 mV	0 mV	20 mV	40 mV	60 mV	80 mV
0	8.52866e-13	-4.91008e-12	3.77292e-12	1.09329e-11	-1.82758e-13	9.16629e-12	5.32839e-12	1.69355e-12	1.01532e-13	-3.10236e-10	-2.85526e-10	-2.59308e-10	-2.46971e-10	-2.43912e-10	-2.48505e-10	-2.77718e-10	-3.19396e-10	-3.76425e-10
0.00025	2.39615e-12	2.80634e-12	-7.03006e-12	3.21653e-12	4.44709e-12	-6.26654e-12	-3.93131e-12	7.86668e-12	3.1881e-12	-3.10227e-10	-2.85517e-10	-2.57737e-10	-2.42368e-10	-2.43821e-10	-2.51501e-10	-2.73216e-10	-3.1335e-10	-3.65822e-10
0.0005	-3.77698e-12	-3.36679e-12	8.40277e-12	-4.49989e-12	-1.82758e-13	-1.63669e-12	2.24182e-12	-4.47958e-12	6.27467e-12	-3.14848e-10	-2.8706e-10	-2.57719e-10	-2.49966e-10	-2.4078e-10	-2.45446e-10	-2.77755e-10	-3.17889e-10	-3.65767e-10
0.00075	-9.95012e-12	1.26305e-12	-1.47465e-11	1.29962e-13	-1.82758e-13	-6.26654e-12	5.32839e-12	3.23684e-12	7.81795e-12	-3.22492e-10	-2.9011e-10	-2.56203e-10	-2.50012e-10	-2.42323e-10	-2.49976e-10	-2.76257e-10	-3.1788e-10	-3.67301e-10
0.001	-6.86355e-12	-3.36679e-12	8.40277e-12	-1.41332e-12	-4.81261e-12	2.99316e-12	2.24182e-12	4.78012e-12	1.64481e-12	-3.20957e-10	-2.88558e-10	-2.57747e-10	-2.50003e-10	-2.4846e-10	-2.48532e-10	-2.76302e-10	-3.11807e-10	-3.68836e-10
0.00125	-8.40684e-12	1.36093e-11	-2.40021e-12	3.21653e-12	-9.44246e-12	6.07972e-12	5.32839e-12	-4.47958e-12	1.64481e-12	-3.11798e-10	-2.80941e-10	-2.62367e-10	-2.48469e-10	-2.53026e-10	-2.57674e-10	-2.85407e-10	-3.16282e-10	-3.68854e-10
0.0015	7.026e-12	-1.26265e-11	-3.9435e-12	-1.41332e-12	4.44709e-12	4.53644e-12	5.32839e-12	6.3234e-12	-6.0716e-12	-3.11807e-10	-2.8401e-10	-2.68431e-10	-2.46934e-10	-2.45382e-10	-2.57637e-10	-2.77818e-10	-3.05679e-10	-3.70361e-10
0.00175	-6.90417e-13	5.89291e-12	6.86356e-13	-1.41332e-12	-3.26932e-12	-1.63669e-12	6.9854e-13	-6.02287e-12	-6.0716e-12	-3.22446e-10	-2.94612e-10	-2.57828e-10	-2.46898e-10	-2.37802e-10	-2.4245e-10	-2.74723e-10	-3.1325e-10	-3.67311e-10
0.002001	2.39615e-12	-1.82351e-12	2.22964e-12	1.29962e-13	-1.72604e-12	-1.63669e-12	5.32839e-12	-2.9363e-12	1.64481e-12	-3.164e-10	-2.79498e-10	-2.63811e-10	-2.42323e-10	-2.52971e-10	-2.53008e-10	-2.74723e-10	-3.14812e-10	-3.65813e-10
0.002251	-2.2337e-12	4.34962e-12	8.40277e-12	6.30309e-12	-1.82758e-13	-1.63669e-12	6.87167e-12	-1.39302e-12	4.73138e-12	-3.1483e-10	-2.91581e-10	-2.54742e-10	-2.42341e-10	-2.46998e-10	-2.48505e-10	-2.77773e-10	-3.13314e-10	-3.73411e-10
0.002501	-6.90417e-13	-1.82351e-12	-2.40021e-12	1.29962e-13	2.90381e-12	-7.80983e-12	5.32839e-12	-2.9363e-12	1.64481e-12	-3.13296e-10	-2.87096e-10	-2.62322e-10	-2.49966e-10	-2.53017e-10	-2.50012e-10	-2.77782e-10	-3.16364e-10	-3.70397e-10
0.002751	3.93944e-12	2.80634e-12	2.22964e-12	6.30309e-12	9.07694e-12	4.53644e-12	-5.47459e-12	4.78012e-12	1.01532e-13	-3.13341e-10	-2.90101e-10	-2.63883e-10	-2.49994e-10	-2.45437e-10	-2.51537e-10	-2.76248e-10	-3.17962e-10	-3.68872e-10
0.003001	-2.2337e-12	-6.45336e-12	-3.9435e-12	-1.41332e-12	1.36052e-12	-3.17998e-12	2.24182e-12	-1.39302e-12	-1.44175e-12	-3.22446e-10	-2.87078e-10	-2.6234e-10	-2.46934e-10	-2.46898e-10	-2.50039e-10	-2.74777e-10	-3.27058e-10	-3.71877e-10
0.003251	-6.90417e-13	1.26305e-12	-8.57335e-12	1.29962e-13	-1.72604e-12	-1.63669e-12	-8.44746e-13	3.23684e-12	1.64481e-12	-3.14894e-10	-2.8864e-10	-2.57774e-10	-2.45409e-10	-2.43893e-10	-2.53108e-10	-2.85389e-10	-3.16428e-10	-3.65776e-10
0.003501	-6.90417e-13	2.80634e-12	6.86356e-13	1.67324e-12	4.44709e-12	-9.35311e-12	6.9854e-13	3.23684e-12	1.64481e-12	-3.17898e-10	-2.97735e-10	-2.60779e-10	-2.48441e-10	-2.49939e-10	-2.5771e-10	-2.76293e-10	-3.14866e-10	-3.62717e-10
0.003751	3.93944e-12	7.43619e-12	2.22964e-12	1.67324e-12	1.36052e-12	-3.17998e-12	6.87167e-12	-1.39302e-12	1.64481e-12	-3.17926e-10	-2.87133e-10	-2.57828e-10	-2.46944e-10	-2.43912e-10	-2.59253e-10	-2.74704e-10	-3.19432e-10	-3.67229e-10
0.004001	-6.86355e-12	5.89291e-12	-1.01166e-11	1.67324e-12	-4.81261e-12	1.07096e-11	-5.47459e-12	4.78012e-12	6.27467e-12	-3.19478e-10	-2.90137e-10	-2.71491e-10	-2.48569e-10	-2.49939e-10	-2.57701e-10	-2.73198e-10	-3.19469e-10	-3.59667e-10
0.004251	-6.90417e-13	-2.80229e-13	-3.9435e-12	-2.95661e-12	2.90381e-12	1.44988e-12	-8.44746e-13	-4.47958e-12	-9.15817e-12	-3.24053e-10	-2.93224e-10	-2.63938e-10	-2.6677e-10	-2.43957e-10	-2.51655e-10	-2.77773e-10	-3.20939e-10	-3.6574e-10
0.004501	3.93944e-12	2.80634e-12	6.85949e-12	-4.49989e-12	2.90381e-12	4.53644e-12	-3.93131e-12	-4.47958e-12	-1.44175e-12	-3.22519e-10	-2.96238e-10	-2.62349e-10	-2.48614e-10	-2.57592e-10	-2.62231e-10	-2.79325e-10	-3.11852e-10	-3.68827e-10
0.004751	3.93944e-12	-1.82351e-12	2.22964e-12	1.67324e-12	-3.26932e-12	-3.17998e-12	-7.01788e-12	6.3234e-12	4.73138e-12	-3.16419e-10	-2.87133e-10	-2.59308e-10	-2.5456e-10	-2.48523e-10	-2.5161e-10	-2.79307e-10	-3.20894e-10	-3.68817e-10
0.005001	-6.90417e-13	-1.82351e-12	6.86356e-13	1.67324e-12	-1.82758e-13	4.53644e-12	6.9854e-13	-4.47958e-12	-6.0716e-12	-3.17862e-10	-2.91644e-10	-2.6234e-10	-2.46953e-10	-2.48496e-10	-2.50039e-10	-2.74786e-10	-3.11798e-10	-3.64288e-10
0.005251	5.48272e-12	-6.45336e-12	8.40277e-12	-2.95661e-12	4.44709e-12	6.07972e-12	6.9854e-13	-2.9363e-12	1.64481e-12	-3.10273e-10	-2.90119e-10	-2.62376e-10	-2.43921e-10	-2.53053e-10	-2.53098e-10	-2.83855e-10	-3.11761e-10	-3.71849e-10
0.005502	2.39615e-12	4.34962e-12	-7.03006e-12	1.67324e-12	9.07694e-12	-4.72326e-12	-1.01044e-11	-7.56615e-12	6.27467e-12	-3.14848e-10	-2.85526e-10	-2.65399e-10	-2.54569e-10	-2.50003e-10	-2.56158e-10	-2.74759e-10	-3.14848e-10	-3.65813e-10
0.005752	-5.32027e-12	5.89291e-12	-8.5693e-13	1.29962e-13	-3.26932e-12	4.53644e-12	-8.44746e-13	1.69355e-12	-2.98503e-12	-3.2241e-10	-2.83991e-10	-2.6086e-10	-2.53108e-10	-2.454e-10	-2.54605e-10	-2.74786e-10	-3.20912e-10	-3.68808e-10
0.006002	-2.2337e-12	-2.80229e-13	-3.9435e-12	-6.04317e-12	2.90381e-12	-1.63669e-12	-7.01788e-12	1.50266e-13	-1.44175e-12	-3.0725e-10	-2.87042e-10	-2.63829e-10	-2.53108e-10	-2.43884e-10	-2.47007e-10	-2.88421e-10	-3.11789e-10	-3.65758e-10
0.006252	-2.2337e-12	5.89291e-12	5.3162e-12	-2.95661e-12	4.44709e-12	-9.34078e-14	-2.38803e-12	-1.39302e-12	3.1881e-12	-3.14803e-10	-2.88585e-10	-2.54696e-10	-2.54614e-10	-2.50021e-10	-2.5308e-10	-2.73279e-10	-3.10245e-10	-3.62763e-10
0.006502	8.52866e-13	2.80634e-12	-3.9435e-12	-4.49989e-12	4.44709e-12	-9.34078e-14	2.24182e-12	-4.47958e-12	1.01532e-13	-3.17889e-10	-2.88549e-10	-2.54642e-10	-2.51555e-10	-2.57646e-10	-2.5614e-10	-2.77791e-10	-3.16355e-10	-3.74891e-10
0.006752	-2.2337e-12	-4.91008e-12	6.85949e-12	-6.04317e-12	-1.82758e-13	2.99316e-12	5.32839e-12	-6.02287e-12	6.27467e-12	-3.164e-10	-2.81014e-10	-2.54678e-10	-2.48523e-10	-2.51592e-10	-2.51601e-10	-2.82394e-10	-3.19432e-10	-3.65831e-10
0.007002	2.39615e-12	-2.80229e-13	6.86356e-13	1.67324e-12	1.36052e-12	-3.17998e-12	-8.44746e-13	1.50266e-13	-4.52832e-12	-3.19396e-10	-2.96165e-10	-2.60779e-10	-2.54578e-10	-2.51583e-10	-2.54596e-10	-2.82403e-10	-3.17889e-10	-3.68854e-10
0.007252	2.39615e-12	-2.80229e-13	-3.9435e-12	3.21653e-12	4.44709e-12	9.16629e-12	-5.47459e-12	-2.9363e-12	-1.44175e-12	-3.11825e-10	-2.87114e-10	-2.60769e-10	-2.50039e-10	-2.56085e-10	-2.50103e-10	-2.7938e-10	-3.11807e-10	-3.73393e-10
0.007502	7.026e-12	4.34962e-12	6.86356e-13	-1.53029e-11	-6.35589e-12	1.44988e-12	-8.44746e-13	4.78012e-12	1.64481e-12	-3.17844e-10	-2.8853e-10	-2.53162e-10	-2.49985e-10	-2.43948e-10	-2.60742e-10	-2.83937e-10	-3.16346e-10	-3.64315e-10
0.007752	-6.90417e-13	4.34962e-12	8.40277e-12	-4.49989e-12	5.99038e-12	-9.34078e-14	2.24182e-12	4.78012e-12	-7.61489e-12	-3.11771e-10	-2.79425e-10	-2.56185e-10	-2.45437e-10	-2.49957e-10	-2.59226e-10	-2.83973e-10	-3.16355e-10	-3.71822e-10
0.008002	-6.90417e-13	-2.80229e-13	2.22964e-12	-1.0673e-11	-1.82758e-13	-9.34078e-14	3.78511e-12	-9.10943e-12	-1.44175e-12	-3.10227e-10	-2.8548e-10	-2.59263e-10	-2.50012e-10	-2.46962e-10	-2.50085e-10	-2.85462e-10	-3.1335e-10	-3.61292e-10
0.008252	5.48272e-12	-9.53993e-12	5.3162e-12	-2.95661e-12	-4.81261e-12	-3.17998e-12	3.78511e-12	1.50266e-13	9.36123e-12	-3.13241e-10	-2.8706e-10	-2.60769e-10	-2.54551e-10	-2.49957e-10	-2.53126e-10	-2.79371e-10	-3.20921e-10	-3.77859e-10
0.008502	-6.90417e-13	-1.82351e-12	-8.57335e-12	1.67324e-12	-1.72604e-12	2.99316e-12	-8.56116e-12	-2.9363e-12	-4.52832e-12	-3.08702e-10	-2.90119e-10	-2.54715e-10	-2.43921e-10	-2.4393e-10	-2.60688e-10	-2.79334e-10	-3.14903e-10	-3.53703e-10
0.008752	5.48272e-12	-2.80229e-13	-5.48678e-12	-4.49989e-12	4.44709e-12	7.62301e-12	-7.01788e-12	-1.06527e-11	-7.61489e-12	-3.11789e-10	-2.90101e-10	-2.60824e-10	-2.46898e-10	-2.53008e-10	-2.47016e-10	-2.79343e-10	-3.20939e-10	-3.77886e-10
0.009003	-2.2337e-12	2.80634e-12	-7.03006e-12	7.84638e-12	-4.81261e-12	-1.63669e-12	2.24182e-12	1.69355e-12	-1.44175e-12	-3.22419e-10	-2.84046e-10	-2.68404e-10	-2.45409e-10	-2.46934e-10	-2.4845e-10	-2.80868e-10	-3.16382e-10	-3.65858e-10
0.009253	-2.2337e-12	1.26305e-12	-1.01166e-11	-6.04317e-12	2.90381e-12	-3.17998e-12	3.78511e-12	-1.39302e-12	6.27467e-12	-3.11789e-10	-2.91617e-10	-2.54796e-10	-2.4846e-10	-2.42341e-10	-2.46953e-10	-2.80887e-10	-3.13341e-10	-3.70361e-10
0.009503	-2.2337e-12	-1.82351e-12	3.77292e-12	1.67324e-12	-1.82758e-13	7.62301e-12	-7.01788e-12	-4.47958e-12	7.81795e-12	-3.08702e-10	-2.8863e-10	-2.66879e-10	-2.49966e-10	-2.45364e-10	-2.49994e-10	-2.82348e-10	-3.19432e-10	-3.70388e-10
0.009753	-2.2337e-12	2.80634e-12	-8.5693e-13	1.67324e-12	2.90381e-12	1.44988e-12	-2.38803e-12	3.23684e-12	7.81795e-12	-3.13277e-10	-2.91644e-10	-2.60833e-10	-2.4383e-10	-2.45382e-10	-2.50067e-10	-2.71718e-10	-3.20939e-10	-3.70343e-10
0.010003	-2.2337e-12	-6.45336e-12	6.86356e-13	4.75981e-12	2.90381e-12	4.53644e-12	3.78511e-12	-4.47958e-12	-6.0716e-12	-3.16364e-10	-2.88594e-10	-2.57665e-10	-2.36232e-10	-2.45409e-10	-2.5919e-10	-2.77791e-10	-3.11816e-10	-3.62708e-10
0.010253	-6.90417e-13	1.26305e-12	2.22964e-12	-7.58646e-12	-4.81261e-12	2.99316e-12	-8.44746e-13	-2.9363e-12	1.64481e-12	-3.17898e-10	-2.85498e-10	-2.4413e-10	-2.46862e-10	-2.49994e-10	-2.54687e-10	-2.8391e-10	-3.14821e-10	-3.61192e-10
0.010503	-3.77698e-12	-4.91008e-12	3.77292e-12	1.29962e-13	-7.89918e-12	-1.63669e-12	-7.01788e-12	-4.47958e-12	-6.0716e-12	-3.16382e-10	-2.80932e-10	-2.78998e-10	-2.46925e-10	-2.5151e-10	-2.57719e-10	-2.80932e-10	-3.16346e-10	-3.70343e-10
0.010753	3.93944e-12	2.80634e-12	2.22964e-12	3.21653e-12	1.36052e-12	-1.63669e-12	-5.47459e-12	4.78012e-12	1.01532e-13	-3.16373e-10	-2.85453e-10	-2.57929e-10	-2.46916e-10	-2.45391e-10	-2.5919e-10	-2.86923e-10	-3.1335e-10	-3.71786e-10
0.011003	8.52866e-13	4.34962e-12	6.86356e-13	4.75981e-12	2.90381e-12	-3.17998e-12	-7.01788e-12	4.78012e-12	-2.98503e-12	-3.16319e-10	-2.80914e-10	-2.70002e-10	-2.45391e-10	-2.40852e-10	-2.47071e-10	-2.71773e-10	-3.21003e-10	-3.4901e-10
0.011253	2.39615e-12	-1.82351e-12	1.14893e-11	1.29962e-13	5.99038e-12	-1.08964e-11	6.9854e-13	3.23684e-12	1.01532e-13	-3.07223e-10	-2.8243e-10	-2.69975e-10	-2.45446e-10	-2.52944e-10	-2.59199e-10	-2.82357e-10	-3.28647e-10	-3.64151e-10
0.011503	7.026e-12	7.43619e-12	-2.40021e-12	6.30309e-12	1.36052e-12	-4.72326e-12	6.9854e-13	-7.56615e-12	4.73138e-12	-3.16319e-10	-2.85498e-10	-2.53217e-10	-2.56076e-10	-2.39336e-10	-2.59253e-10	-2.82448e-10	-3.24035e-10	-3.68863e-10
0.011753	8.52866e-13	-2.80229e-13	6.86356e-13	1.29962e-13	-4.81261e-12	1.07096e-11	-1.01044e-11	1.69355e-12	-6.0716e-12	-3.16282e-10	-2.87042e-10	-2.56185e-10	-2.48541e-10	-2.46898e-10	-2.5624e-10	-2.86996e-10	-3.10336e-10	-3.76443e-10
0.012003	-8.40684e-12	-2.80229e-13	5.3162e-12	3.21653e-12	1.06202e-11	1.44988e-12	-3.93131e-12	1.50266e-13	7.81795e-12	-3.01168e-10	-2.87078e-10	-2.59263e-10	-2.53044e-10	-2.49948e-10	-2.62304e-10	-2.82439e-10	-3.19369e-10	-3.64324e-10
0.012253	3.93944e-12	-1.82351e-12	-7.03006e-12	-4.49989e-12	4.44709e-12	-9.35311e-12	5.32839e-12	6.3234e-12	6.27467e-12	-3.23935e-10	-2.91635e-10	-2.60851e-10	-2.48487e-10	-2.42368e-10	-2.59235e-10	-2.80905e-10	-3.1335e-10	-3.70324e-10
0.012503	2.39615e-12	4.34962e-12	-3.9435e-12	-1.41332e-12	-1.82758e-13	-1.63669e-12	-8.44746e-13	-2.9363e-12	6.27467e-12	-3.20948e-10	-2.8863e-10	-2.68449e-10	-2.46989e-10	-2.46889e-10	-2.50094e-10	-2.8391e-10	-3.17926e-10	-3.65804e-10
0.012754	2.39615e-12	-1.82351e-12	-5.48678e-12	6.30309e-12	-3.26932e-12	-4.72326e-12	6.9854e-13	1.69355e-12	-4.52832e-12	-3.08748e-10	-2.91635e-10	-2.62385e-10	-2.56058e-10	-2.454e-10	-2.54624e-10	-2.77827e-10	-3.23989e-10	-3.6879e-10
0.013004	-6.86355e-12	-4.91008e-12	6.86356e-13	6.30309e-12	-1.82758e-13	-3.17998e-12	-7.01788e-12	-2.9363e-12	-2.98503e-12	-3.11752e-10	-2.87069e-10	-2.60824e-10	-2.4393e-10	-2.46925e-10	-2.56158e-10	-2.77782e-10	-3.13378e-10	-3.62708e-10
0.013254	2.39615e-12	5.89291e-12	-2.40021e-12	3.21653e-12	-4.81261e-12	4.53644e-12	3.78511e-12	-4.47958e-12	1.64481e-12	-3.16337e-10	-2.85562e-10	-2.60815e-10	-2.46916e-10	-2.48478e-10	-2.53153e-10	-2.7623e-10	-3.17898e-10	-3.62708e-10
0.013504	-2.2337e-12	-4.91008e-12	-3.9435e-12	1.29962e-13	-3.26932e-12	-7.80983e-12	-5.47459e-12	-7.56615e-12	1.01532e-13	-3.14839e-10	-2.93106e-10	-2.60815e-10	-2.48441e-10	-2.51501e-10	-2.59181e-10	-2.71663e-10	-3.1946e-10	-3.68808e-10
0.013754	2.39615e-12	4.34962e-12	1.14893e-11	-1.41332e-12	4.44709e-12	-1.63669e-12	6.9854e-13	3.23684e-12	1.01532e-13	-3.1483e-10	-2.80987e-10	-2.60824e-10	-2.45409e-10	-2.45428e-10	-2.50112e-10	-2.74723e-10	-3.2103e-10	-3.68918e-10
0.014004	-6.90417e-13	2.80634e-12	-5.48678e-12	-7.58646e-12	5.99038e-12	6.07972e-12	5.32839e-12	4.78012e-12	-1.44175e-12	-3.14821e-10	-2.86978e-10	-2.62349e-10	-2.46934e-10	-2.46925e-10	-2.57674e-10	-2.80823e-10	-3.27094e-10	-3.81027e-10
0.014254	3.93944e-12	-1.82351e-12	2.22964e-12	-2.95661e-12	-4.81261e-12	-7.80983e-12	6.87167e-12	-6.02287e-12	-4.52832e-12	-3.1335e-10	-2.80941e-10	-2.62367e-10	-2.49966e-10	-2.48441e-10	-2.56258e-10	-2.77791e-10	-3.19532e-10	-3.6584e-10
0.014504	-2.2337e-12	-2.80229e-13	8.40277e-12	-1.41332e-12	-1.82758e-13	-9.34078e-14	-2.38803e-12	-1.39302e-12	1.01532e-13	-3.22446e-10	-2.85517e-10	-2.63865e-10	-2.45464e-10	-2.45428e-10	-2.66915e-10	-2.74732e-10	-3.24017e-10	-3.64233e-10
0.014754	2.39615e-12	-6.45336e-12	-1.01166e-11	1.29962e-13	-1.72604e-12	9.16629e-12	-8.44746e-13	1.50266e-13	-2.98503e-12	-3.14939e-10	-2.91617e-10	-2.59299e-10	-2.54523e-10	-2.4993e-10	-2.65345e-10	-2.76284e-10	-3.16464e-10	-3.65758e-10
0.015004	-6.90417e-13	-1.82351e-12	3.77292e-12	4.75981e-12	-1.72604e-12	1.44988e-12	5.32839e-12	-2.9363e-12	3.1881e-12	-3.25524e-10	-2.87105e-10	-2.59308e-10	-2.4393e-10	-2.40871e-10	-2.47098e-10	-2.83864e-10	-3.24044e-10	-3.67301e-10
0.015254	8.52866e-13	-2.80229e-13	6.86356e-13	1.67324e-12	2.90381e-12	-4.72326e-12	-7.01788e-12	6.3234e-12	6.27467e-12	-3.17953e-10	-2.91717e-10	-2.65436e-10	-2.48441e-10	-2.51482e-10	-2.57637e-10	-2.74786e-10	-3.24053e-10	-3.68827e-10
0.015504	3.93944e-12	-2.80229e-13	-2.40021e-12	-1.41332e-12	4.44709e-12	-9.34078e-14	-8.44746e-13	1.50266e-13	1.01532e-13	-3.16364e-10	-3.02302e-10	-2.69984e-10	-2.4845e-10	-2.49994e-10	-2.53126e-10	-2.79252e-10	-3.17971e-10	-3.67311e-10
0.015754	2.39615e-12	-4.91008e-12	5.3162e-12	7.84638e-12	-6.35589e-12	7.62301e-12	3.78511e-12	-2.9363e-12	7.81795e-12	-3.13314e-10	-2.82594e-10	-2.59354e-10	-2.45409e-10	-2.45391e-10	-2.53153e-10	-2.70129e-10	-3.20957e-10	-3.67338e-10
0.016004	3.93944e-12	-2.80229e-13	3.77292e-12	1.29962e-13	-1.82758e-13	-6.26654e-12	2.24182e-12	-9.10943e-12	-2.98503e-12	-3.14912e-10	-2.91617e-10	-2.62313e-10	-2.46907e-10	-2.42368e-10	-2.62285e-10	-2.70156e-10	-3.164e-10	-3.73411e-10
0.016255	-6.90417e-13	-6.45336e-12	-3.9435e-12	-4.49989e-12	-3.26932e-12	-3.17998e-12	-2.38803e-12	-1.39302e-12	1.64481e-12	-3.30081e-10	-2.90119e-10	-2.57792e-10	-2.45382e-10	-2.51455e-10	-2.59217e-10	-2.83846e-10	-3.164e-10	-3.68881e-10
0.016505	3.93944e-12	-1.82351e-12	2.22964e-12	-2.95661e-12	4.44709e-12	1.44988e-12	2.24182e-12	-4.47958e-12	-1.44175e-12	-3.14921e-10	-2.85535e-10	-2.63892e-10	-2.43839e-10	-2.43921e-10	-2.47062e-10	-2.77882e-10	-3.20994e-10	-3.70388e-10
0.016755	5.48272e-12	2.80634e-12	-3.9435e-12	3.21653e-12	4.44709e-12	9.16629e-12	6.9854e-13	3.23684e-12	6.27467e-12	-3.14821e-10	-2.85526e-10	-2.68431e-10	-2.42323e-10	-2.50003e-10	-2.5771e-10	-2.86923e-10	-3.24035e-10	-3.71913e-10
0.017005	-6.90417e-13	-2.80229e-13	-2.40021e-12	-2.95661e-12	-1.72604e-12	4.53644e-12	-2.38803e-12	1.69355e-12	-6.0716e-12	-3.13287e-10	-2.88594e-10	-2.56258e-10	-2.45337e-10	-2.5456e-10	-2.65308e-10	-2.74805e-10	-3.17989e-10	-3.70361e-10
0.017255	-2.2337e-12	-6.45336e-12	3.77292e-12	-2.95661e-12	2.90381e-12	4.53644e-12	3.78511e-12	-1.39302e-12	3.1881e-12	-3.11725e-10	-2.91644e-10	-2.5624e-10	-2.40871e-10	-2.45446e-10	-2.50158e-10	-2.79289e-10	-3.2398e-10	-3.64242e-10
0.017505	-3.77698e-12	-3.36679e-12	-3.9435e-12	-1.0673e-11	-3.26932e-12	-3.17998e-12	6.9854e-13	4.78012e-12	-1.44175e-12	-3.07195e-10	-2.88658e-10	-2.65363e-10	-2.56076e-10	-2.46907e-10	-2.5919e-10	-2.76293e-10	-3.11925e-10	-3.62681e-10
0.017755	3.93944e-12	1.26305e-12	-3.9435e-12	1.29962e-13	-4.81261e-12	-1.63669e-12	-8.44746e-13	-1.39302e-12	1.01532e-13	-3.16355e-10	-2.96192e-10	-2.60833e-10	-2.53117e-10	-2.45391e-10	-2.54669e-10	-2.80878e-10	-3.30099e-10	-3.62735e-10
0.018005	1.16559e-11	-2.80229e-13	9.94606e-12	1.29962e-13	-3.26932e-12	-3.17998e-12	-5.47459e-12	6.3234e-12	3.1881e-12	-3.22437e-10	-2.84001e-10	-2.59308e-10	-2.53098e-10	-2.454e-10	-2.54642e-10	-2.85435e-10	-3.21058e-10	-3.7332e-10
0.018255	2.39615e-12	-6.45336e-12	3.77292e-12	1.67324e-12	5.99038e-12	-3.17998e-12	6.9854e-13	-1.39302e-12	1.64481e-12	-3.103e-10	-2.779e-10	-2.63865e-10	-2.53062e-10	-2.48432e-10	-2.54642e-10	-2.778e-10	-3.21012e-10	-3.58178e-10
0.018505	2.39615e-12	-3.36679e-12	3.77292e-12	-6.04317e-12	-1.09857e-11	-9.34078e-14	-1.01044e-11	1.69355e-12	1.01532e-13	-3.14757e-10	-2.90001e-10	-2.62367e-10	-2.4698e-10	-2.45391e-10	-2.54624e-10	-2.71645e-10	-3.22555e-10	-3.65722e-10
0.018755	8.56928e-12	7.43619e-12	-7.03006e-12	1.29962e-13	4.44709e-12	4.53644e-12	-7.01788e-12	-1.39302e-12	-4.52832e-12	-3.07232e-10	-2.79407e-10	-2.62349e-10	-2.49966e-10	-2.43893e-10	-2.51601e-10	-2.70111e-10	-3.25615e-10	-3.67256e-10
0.019005	2.39615e-12	-2.80229e-13	5.3162e-12	7.84638e-12	-1.82758e-13	1.44988e-12	6.9854e-13	-1.39302e-12	1.01532e-13	-3.19369e-10	-2.80841e-10	-2.60742e-10	-2.45409e-10	-2.51492e-10	-2.5613e-10	-2.74668e-10	-3.25578e-10	-3.61183e-10
0.019255	-2.2337e-12	-1.82351e-12	6.86356e-13	-1.41332e-12	4.44709e-12	4.53644e-12	-5.47459e-12	-4.47958e-12	-1.44175e-12	-3.16382e-10	-2.76339e-10	-2.4708e-10	-2.45409e-10	-2.48514e-10	-2.5161e-10	-2.73225e-10	-3.16446e-10	-3.64188e-10
0.019505	5.48272e-12	-1.82351e-12	6.86356e-13	-7.58646e-12	4.44709e-12	-9.34078e-14	-1.3191e-11	3.23684e-12	6.27467e-12	-3.14812e-10	-2.86951e-10	-2.59226e-10	-2.49976e-10	-2.53053e-10	-2.56149e-10	-2.82294e-10	-3.1946e-10	-3.62672e-10
0.019756	2.39615e-12	-4.91008e-12	-3.9435e-12	-1.41332e-12	-1.72604e-12	6.07972e-12	2.24182e-12	6.3234e-12	3.1881e-12	-3.10245e-10	-2.8095e-10	-2.6382e-10	-2.48478e-10	-2.49994e-10	-2.54705e-10	-2.70166e-10	-3.22501e-10	-3.61192e-10
0.020006	2.39615e-12	4.34962e-12	-3.9435e-12	-7.58646e-12	1.36052e-12	2.99316e-12	6.87167e-12	6.3234e-12	-2.98503e-12	-3.13287e-10	-2.86987e-10	-2.54687e-10	-2.48478e-10	-2.43884e-10	-2.63829e-10	-2.7317e-10	-3.17944e-10	-3.70279e-10
0.020256	-6.90417e-13	-4.91008e-12	-5.48678e-12	1.67324e-12	5.99038e-12	1.44988e-12	-5.47459e-12	-4.47958e-12	3.1881e-12	-3.16382e-10	-2.82439e-10	-2.53162e-10	-2.5003e-10	-2.45428e-10	-2.60806e-10	-2.77727e-10	-3.17916e-10	-3.61165e-10
0.020506	3.93944e-12	-1.82351e-12	6.85949e-12	6.30309e-12	5.99038e-12	-9.34078e-14	-1.01044e-11	-2.9363e-12	6.27467e-12	-3.20948e-10	-2.80941e-10	-2.62304e-10	-2.5456e-10	-2.5456e-10	-2.56194e-10	-2.71745e-10	-3.1788e-10	-3.58087e-10
0.020756	-3.77698e-12	4.34962e-12	-3.9435e-12	-6.04317e-12	-7.89918e-12	4.53644e-12	-2.38803e-12	1.50266e-13	3.1881e-12	-3.16373e-10	-2.90037e-10	-2.62358e-10	-2.45464e-10	-2.50039e-10	-2.53126e-10	-2.86896e-10	-3.11789e-10	-3.62681e-10
0.021006	-6.86355e-12	5.89291e-12	-2.40021e-12	1.67324e-12	-3.26932e-12	2.99316e-12	3.78511e-12	1.50266e-13	7.81795e-12	-3.11761e-10	-2.82448e-10	-2.62358e-10	-2.49994e-10	-2.50012e-10	-2.54605e-10	-2.76357e-10	-3.13332e-10	-3.68745e-10
0.021256	2.39615e-12	-4.91008e-12	-2.40021e-12	-2.95661e-12	5.99038e-12	4.53644e-12	5.32839e-12	-6.02287e-12	-2.98503e-12	-3.10245e-10	-2.79434e-10	-2.62395e-10	-2.51537e-10	-2.50003e-10	-2.50094e-10	-2.8391e-10	-3.22428e-10	-3.58178e-10
0.021506	3.93944e-12	-1.82351e-12	-7.03006e-12	-2.95661e-12	-1.82758e-13	2.99316e-12	8.41496e-12	-4.47958e-12	-2.98503e-12	-3.16328e-10	-2.93051e-10	-2.68504e-10	-2.50012e-10	-2.48441e-10	-2.59153e-10	-2.8243e-10	-3.11843e-10	-3.70261e-10
0.021756	-5.32027e-12	-6.45336e-12	-7.03006e-12	3.21653e-12	-9.44246e-12	-9.34078e-14	-1.47343e-11	4.78012e-12	1.01532e-13	-3.1483e-10	-2.77864e-10	-2.70011e-10	-2.48496e-10	-2.42368e-10	-2.48541e-10	-2.82421e-10	-3.17862e-10	-3.61238e-10
0.022006	-3.77698e-12	7.43619e-12	6.86356e-13	-1.41332e-12	-1.72604e-12	-4.72326e-12	6.9854e-13	3.23684e-12	6.27467e-12	-3.13277e-10	-2.74814e-10	-2.6086e-10	-2.51482e-10	-2.48414e-10	-2.50039e-10	-2.82412e-10	-3.14848e-10	-3.7027e-10
0.022256	-6.90417e-13	-3.36679e-12	3.77292e-12	1.67324e-12	-1.72604e-12	2.99316e-12	3.78511e-12	1.69355e-12	1.01532e-13	-3.10245e-10	-2.89974e-10	-2.59308e-10	-2.42368e-10	-2.45409e-10	-2.56121e-10	-2.80841e-10	-3.14857e-10	-3.59685e-10
0.022506	-2.2337e-12	-3.36679e-12	6.86356e-13	1.67324e-12	2.90381e-12	-9.34078e-14	-8.44746e-13	3.23684e-12	1.01532e-13	-3.1483e-10	-2.77918e-10	-2.63838e-10	-2.45355e-10	-2.46898e-10	-2.51592e-10	-2.73216e-10	-3.19451e-10	-3.65676e-10
0.022756	-6.90417e-13	4.34962e-12	-2.40021e-12	6.30309e-12	-4.81261e-12	7.62301e-12	8.41496e-12	4.78012e-12	1.01532e-13	-3.19369e-10	-2.86996e-10	-2.57828e-10	-2.43866e-10	-2.43857e-10	-2.53044e-10	-2.74714e-10	-3.2251e-10	-3.58115e-10
0.023006	5.48272e-12	2.80634e-12	6.85949e-12	1.67324e-12	4.44709e-12	1.44988e-12	-2.38803e-12	1.50266e-13	-1.44175e-12	-3.08793e-10	-2.87005e-10	-2.6844e-10	-2.46889e-10	-2.43884e-10	-2.45446e-10	-2.77764e-10	-3.19441e-10	-3.62617e-10
0.023256	-6.90417e-13	-1.82351e-12	2.22964e-12	-2.95661e-12	7.53366e-12	-3.17998e-12	6.9854e-13	-6.02287e-12	1.01532e-13	-3.20885e-10	-2.79443e-10	-2.6382e-10	-2.43884e-10	-2.51455e-10	-2.48478e-10	-2.76248e-10	-3.13368e-10	-3.58124e-10
0.023507	-2.2337e-12	4.34962e-12	6.86356e-13	-1.41332e-12	-1.72604e-12	-1.63669e-12	5.32839e-12	-1.39302e-12	1.01532e-13	-3.13305e-10	-2.90074e-10	-2.45682e-10	-2.48469e-10	-2.42368e-10	-2.5308e-10	-2.74777e-10	-3.20921e-10	-3.67274e-10
0.023757	-3.77698e-12	-2.80229e-13	-8.5693e-13	3.21653e-12	-1.82758e-13	-3.17998e-12	8.41496e-12	-4.47958e-12	1.01532e-13	-3.0872e-10	-2.90083e-10	-2.775e-10	-2.53071e-10	-2.45373e-10	-2.54633e-10	-2.8538e-10	-3.14884e-10	-3.71849e-10
0.024007	8.52866e-13	5.89291e-12	3.77292e-12	-7.58646e-12	7.53366e-12	4.53644e-12	-5.47459e-12	-4.47958e-12	-6.0716e-12	-3.14766e-10	-2.80978e-10	-2.6087e-10	-2.53117e-10	-2.46871e-10	-2.54624e-10	-2.74723e-10	-3.1788e-10	-3.62753e-10
0.024257	7.026e-12	-6.45336e-12	-2.40021e-12	1.67324e-12	-3.26932e-12	1.44988e-12	-1.01044e-11	-4.47958e-12	1.01532e-13	-3.10273e-10	-2.8853e-10	-2.53217e-10	-2.56094e-10	-2.39254e-10	-2.51555e-10	-2.67134e-10	-3.14875e-10	-3.67229e-10
0.024507	-2.2337e-12	5.89291e-12	2.22964e-12	1.29962e-13	4.44709e-12	2.99316e-12	2.24182e-12	1.69355e-12	-2.98503e-12	-3.1788e-10	-2.85526e-10	-2.65354e-10	-2.43893e-10	-2.39245e-10	-2.48496e-10	-2.83828e-10	-3.19396e-10	-3.59676e-10
0.024757	8.52866e-13	-2.80229e-13	3.77292e-12	3.21653e-12	-1.82758e-13	7.62301e-12	-5.47459e-12	1.69355e-12	1.01532e-13	-3.19432e-10	-2.85489e-10	-2.62404e-10	-2.40807e-10	-2.45327e-10	-2.50021e-10	-2.77782e-10	-3.13332e-10	-3.67256e-10
0.025007	2.39615e-12	-6.45336e-12	2.22964e-12	1.67324e-12	7.53366e-12	4.53644e-12	1.15015e-11	1.09533e-11	-1.44175e-12	-3.16419e-10	-2.82494e-10	-2.66943e-10	-2.46916e-10	-2.42296e-10	-2.53098e-10	-2.70166e-10	-3.14812e-10	-3.67283e-10
0.025257	2.39615e-12	-2.80229e-13	-3.9435e-12	4.75981e-12	2.90381e-12	-1.08964e-11	6.9854e-13	-1.39302e-12	1.64481e-12	-3.20948e-10	-2.91562e-10	-2.63883e-10	-2.51519e-10	-2.39282e-10	-2.56212e-10	-2.77736e-10	-3.13314e-10	-3.64242e-10
0.025507	-2.2337e-12	-1.82351e-12	3.77292e-12	6.30309e-12	-4.81261e-12	4.53644e-12	6.87167e-12	1.69355e-12	1.64481e-12	-3.16373e-10	-2.80959e-10	-2.57856e-10	-2.49994e-10	-2.48378e-10	-2.63829e-10	-2.76257e-10	-3.16373e-10	-3.65767e-10
0.025757	-8.40684e-12	-1.82351e-12	3.77292e-12	7.84638e-12	2.90381e-12	-4.72326e-12	-1.01044e-11	-4.47958e-12	3.1881e-12	-3.1178e-10	-2.83982e-10	-2.73025e-10	-2.45437e-10	-2.42405e-10	-2.59253e-10	-2.76293e-10	-3.19469e-10	-3.68799e-10
0.026007	2.39615e-12	-2.80229e-13	6.86356e-13	-1.0673e-11	-3.26932e-12	-3.17998e-12	-2.38803e-12	3.23684e-12	1.64481e-12	-3.13314e-10	-2.90083e-10	-2.65472e-10	-2.49966e-10	-2.54514e-10	-2.51674e-10	-2.83837e-10	-3.24053e-10	-3.64288e-10
0.026257	-6.90417e-13	-2.80229e-13	5.3162e-12	3.21653e-12	-4.81261e-12	4.53644e-12	2.24182e-12	1.69355e-12	1.64481e-12	-3.19387e-10	-2.8706e-10	-2.62349e-10	-2.4698e-10	-2.45428e-10	-2.63792e-10	-2.70202e-10	-3.22546e-10	-3.71877e-10
0.026507	-3.77698e-12	-4.91008e-12	-7.03006e-12	-2.95661e-12	4.44709e-12	7.62301e-12	6.87167e-12	-6.02287e-12	-4.52832e-12	-3.13368e-10	-2.85544e-10	-2.5781e-10	-2.53035e-10	-2.43884e-10	-2.57756e-10	-2.77709e-10	-3.20994e-10	-3.70406e-10
0.026757	8.56928e-12	2.80634e-12	6.86356e-13	7.84638e-12	2.90381e-12	2.99316e-12	3.78511e-12	3.23684e-12	-6.0716e-12	-3.20948e-10	-2.90092e-10	-2.6687e-10	-2.48505e-10	-2.50012e-10	-2.56176e-10	-2.71736e-10	-3.17935e-10	-3.71886e-10
0.027008	-2.2337e-12	5.89291e-12	6.85949e-12	-1.41332e-12	-1.82758e-13	-4.72326e-12	6.9854e-13	-2.9363e-12	3.1881e-12	-3.19432e-10	-2.87087e-10	-2.56285e-10	-2.50021e-10	-2.56049e-10	-2.53135e-10	-2.85398e-10	-3.17898e-10	-3.65813e-10
0.027258	-2.2337e-12	-9.53993e-12	-3.9435e-12	1.67324e-12	-1.82758e-13	-9.34078e-14	6.9854e-13	1.50266e-13	-6.0716e-12	-3.13277e-10	-2.90065e-10	-2.62304e-10	-2.53062e-10	-2.39373e-10	-2.56158e-10	-2.80859e-10	-3.14857e-10	-3.68817e-10
0.027508	1.01126e-11	4.34962e-12	-2.40021e-12	4.75981e-12	1.36052e-12	2.99316e-12	-3.93131e-12	-4.47958e-12	-2.98503e-12	-3.05707e-10	-2.80932e-10	-2.59308e-10	-2.49985e-10	-2.49921e-10	-2.54651e-10	-2.73234e-10	-3.16319e-10	-3.67247e-10
0.027758	-2.2337e-12	2.80634e-12	6.86356e-13	4.75981e-12	1.36052e-12	-4.72326e-12	3.78511e-12	1.69355e-12	1.64481e-12	-3.20857e-10	-2.80896e-10	-2.6234e-10	-2.42359e-10	-2.45428e-10	-2.54669e-10	-2.77764e-10	-3.08702e-10	-3.56626e-10
0.028008	3.93944e-12	-3.36679e-12	-3.9435e-12	-2.95661e-12	-7.89918e-12	-9.34078e-14	5.32839e-12	-1.39302e-12	-1.44175e-12	-3.11816e-10	-2.83964e-10	-2.62349e-10	-2.45346e-10	-2.48414e-10	-2.59244e-10	-2.77782e-10	-3.08711e-10	-3.6722e-10
0.028258	-2.2337e-12	-1.82351e-12	6.86356e-13	-9.12974e-12	1.06202e-11	4.53644e-12	-7.01788e-12	4.78012e-12	-4.52832e-12	-3.1483e-10	-2.87023e-10	-2.60833e-10	-2.42377e-10	-2.42368e-10	-2.59235e-10	-2.76284e-10	-3.17844e-10	-3.64251e-10
0.028508	-2.2337e-12	-4.91008e-12	-5.48678e-12	1.67324e-12	4.44709e-12	7.62301e-12	2.24182e-12	-4.47958e-12	1.01532e-13	-3.17871e-10	-2.85507e-10	-2.62331e-10	-2.53017e-10	-2.48396e-10	-2.53153e-10	-2.80823e-10	-3.14903e-10	-3.67256e-10
0.028758	-6.90417e-13	5.89291e-12	-2.40021e-12	4.75981e-12	-7.89918e-12	2.99316e-12	6.9854e-13	-2.9363e-12	1.01532e-13	-3.13323e-10	-2.83973e-10	-2.59326e-10	-2.5003e-10	-2.42323e-10	-2.56149e-10	-2.76257e-10	-3.24026e-10	-3.62735e-10
0.029008	-3.77698e-12	-2.80229e-13	-3.9435e-12	1.67324e-12	4.44709e-12	-9.34078e-14	3.78511e-12	4.78012e-12	-1.44175e-12	-3.14666e-10	-2.83991e-10	-2.65372e-10	-2.50012e-10	-2.4078e-10	-2.53153e-10	-2.73216e-10	-3.2251e-10	-3.6879e-10
0.029258	5.48272e-12	-9.53993e-12	5.3162e-12	1.29962e-13	5.99038e-12	4.53644e-12	2.24182e-12	6.3234e-12	3.1881e-12	-2.88985e-10	-2.88585e-10	-2.59363e-10	-2.49985e-10	-2.43857e-10	-2.59199e-10	-2.79307e-10	-3.14875e-10	-3.65767e-10
0.029508	-6.90417e-13	1.26305e-12	-8.5693e-13	-4.49989e-12	4.44709e-12	-9.34078e-14	6.9854e-13	1.69355e-12	7.81795e-12	-3.28428e-10	-2.91608e-10	-2.68422e-10	-2.45391e-10	-2.49875e-10	-2.53135e-10	-2.80905e-10	-3.14803e-10	-3.64251e-10
0.029758	-2.2337e-12	-2.80229e-13	-2.40021e-12	1.29962e-13	-1.82758e-13	1.44988e-12	-3.93131e-12	1.50266e-13	4.73138e-12	-3.19514e-10	-2.82503e-10	-2.59363e-10	-2.4235e-10	-2.33181e-10	-2.53144e-10	-2.87005e-10	-3.10264e-10	-3.68745e-10
0.030008	-2.2337e-12	-3.36679e-12	6.86356e-13	-6.04317e-12	1.36052e-12	2.99316e-12	2.24182e-12	-2.9363e-12	6.27467e-12	-3.19432e-10	-2.87042e-10	-2.65372e-10	-2.4846e-10	-2.4077e-10	-2.60706e-10	-2.85471e-10	-3.16382e-10	-3.56626e-10
0.030258	-2.2337e-12	-2.80229e-13	-3.9435e-12	-1.41332e-12	4.44709e-12	1.44988e-12	-8.44746e-13	-4.47958e-12	1.64481e-12	-3.14821e-10	-2.90055e-10	-2.5939e-10	-2.52953e-10	-2.51455e-10	-2.5013e-10	-2.77873e-10	-3.2398e-10	-3.65685e-10
0.030509	-6.90417e-13	7.43619e-12	8.40277e-12	4.75981e-12	-1.72604e-12	4.53644e-12	2.24182e-12	-1.39302e-12	-6.0716e-12	-3.0872e-10	-2.79453e-10	-2.73007e-10	-2.33291e-10	-2.45446e-10	-2.59244e-10	-2.83937e-10	-3.13405e-10	-3.62699e-10
0.030759	-5.32027e-12	7.43619e-12	-3.9435e-12	3.21653e-12	4.44709e-12	1.44988e-12	-8.44746e-13	1.50266e-13	1.64481e-12	-3.13232e-10	-2.88521e-10	-2.60906e-10	-2.55967e-10	-2.49912e-10	-2.63829e-10	-2.85462e-10	-3.22428e-10	-3.64169e-10
0.031009	3.93944e-12	-3.36679e-12	6.86356e-13	6.30309e-12	-1.72604e-12	2.99316e-12	-8.44746e-13	-1.39302e-12	7.81795e-12	-3.08711e-10	-2.85498e-10	-2.63892e-10	-2.42396e-10	-2.37802e-10	-2.5624e-10	-2.79371e-10	-3.11789e-10	-3.58115e-10
0.031259	5.48272e-12	2.80634e-12	2.22964e-12	6.30309e-12	7.53366e-12	-4.72326e-12	-3.93131e-12	3.23684e-12	4.73138e-12	-3.13287e-10	-2.80914e-10	-2.65417e-10	-2.45373e-10	-2.48405e-10	-2.57674e-10	-2.79353e-10	-3.08693e-10	-3.64224e-10
0.031509	8.52866e-13	4.34962e-12	6.86356e-13	4.75981e-12	-3.26932e-12	2.99316e-12	-2.38803e-12	-2.9363e-12	1.01532e-13	-3.17889e-10	-2.8243e-10	-2.62349e-10	-2.46934e-10	-2.48441e-10	-2.50094e-10	-2.82421e-10	-3.11734e-10	-3.71868e-10
0.031759	5.48272e-12	5.89291e-12	-1.16599e-11	1.67324e-12	5.99038e-12	-6.26654e-12	8.41496e-12	3.23684e-12	4.73138e-12	-3.17889e-10	-2.85517e-10	-2.57774e-10	-2.50012e-10	-2.43857e-10	-2.56121e-10	-2.85498e-10	-3.13296e-10	-3.68854e-10
0.032009	-6.90417e-13	8.97947e-12	-8.5693e-13	-1.41332e-12	-6.35589e-12	-6.26654e-12	6.9854e-13	-6.02287e-12	1.64481e-12	-3.13341e-10	-2.90019e-10	-2.60797e-10	-2.53108e-10	-2.42341e-10	-2.51583e-10	-2.86969e-10	-3.16364e-10	-3.67247e-10
0.032259	-2.2337e-12	-4.91008e-12	-8.57335e-12	-4.49989e-12	-4.81261e-12	6.07972e-12	-3.93131e-12	3.23684e-12	-1.44175e-12	-3.17871e-10	-2.74841e-10	-2.60797e-10	-2.57637e-10	-2.48396e-10	-2.51528e-10	-2.74795e-10	-3.17871e-10	-3.56608e-10
0.032509	8.52866e-13	-2.80229e-13	6.86356e-13	6.30309e-12	-1.72604e-12	2.99316e-12	-2.38803e-12	-2.9363e-12	-4.52832e-12	-3.14803e-10	-2.82403e-10	-2.57792e-10	-2.46962e-10	-2.4235e-10	-2.47044e-10	-2.77764e-10	-3.11807e-10	-3.64206e-10
0.032759	-6.90417e-13	2.80634e-12	-3.9435e-12	1.67324e-12	-1.82758e-13	-3.17998e-12	8.41496e-12	4.78012e-12	-4.52832e-12	-3.07241e-10	-2.86996e-10	-2.65336e-10	-2.42414e-10	-2.45418e-10	-2.62213e-10	-2.76293e-10	-3.16355e-10	-3.70288e-10
0.033009	-5.32027e-12	-2.80229e-13	6.85949e-12	1.67324e-12	-1.72604e-12	4.53644e-12	5.32839e-12	1.69355e-12	1.64481e-12	-3.2083e-10	-2.82475e-10	-2.54742e-10	-2.57592e-10	-2.54469e-10	-2.53226e-10	-2.82339e-10	-3.17898e-10	-3.59649e-10
0.033259	-6.86355e-12	-4.91008e-12	6.86356e-13	1.67324e-12	5.99038e-12	-9.35311e-12	2.24182e-12	4.78012e-12	3.1881e-12	-3.05688e-10	-2.87023e-10	-2.60779e-10	-2.50048e-10	-2.34752e-10	-2.65308e-10	-2.74741e-10	-3.16391e-10	-3.59685e-10
0.033509	3.93944e-12	-2.80229e-13	3.77292e-12	6.30309e-12	-4.81261e-12	1.44988e-12	-1.01044e-11	3.23684e-12	-6.0716e-12	-3.10218e-10	-2.87005e-10	-2.60806e-10	-2.4846e-10	-2.43839e-10	-2.54742e-10	-2.7317e-10	-3.17926e-10	-3.76388e-10
0.033759	3.93944e-12	-3.36679e-12	3.77292e-12	1.55628e-11	1.06202e-11	-3.17998e-12	2.24182e-12	-9.10943e-12	3.1881e-12	-3.17816e-10	-2.79407e-10	-2.59299e-10	-2.454e-10	-2.53017e-10	-2.60706e-10	-2.73134e-10	-3.20939e-10	-3.64333e-10
0.034009	2.39615e-12	-4.91008e-12	3.77292e-12	-7.58646e-12	4.44709e-12	-4.72326e-12	3.78511e-12	1.50266e-13	4.73138e-12	-3.0872e-10	-2.83928e-10	-2.62367e-10	-2.45382e-10	-2.48541e-10	-2.48614e-10	-2.68586e-10	-3.13359e-10	-3.71822e-10
0.03426	2.39615e-12	4.34962e-12	6.85949e-12	-4.49989e-12	-1.82758e-13	-3.17998e-12	5.32839e-12	1.50266e-13	4.73138e-12	-3.10236e-10	-2.82466e-10	-2.66979e-10	-2.45428e-10	-2.56049e-10	-2.60742e-10	-2.73188e-10	-3.17944e-10	-3.6121e-10
0.03451	-9.95012e-12	-3.36679e-12	-8.5693e-13	1.67324e-12	-6.35589e-12	-1.63669e-12	3.78511e-12	-4.47958e-12	1.01532e-13	-3.17862e-10	-2.88558e-10	-2.70002e-10	-2.53089e-10	-2.40889e-10	-2.60751e-10	-2.8233e-10	-3.27085e-10	-3.64224e-10
0.03476	-5.32027e-12	2.80634e-12	-5.48678e-12	-2.95661e-12	-1.82758e-13	6.07972e-12	2.24182e-12	-4.47958e-12	-2.98503e-12	-3.16373e-10	-2.88567e-10	-2.60897e-10	-2.59162e-10	-2.48414e-10	-2.50094e-10	-2.76293e-10	-3.20994e-10	-3.68781e-10
0.03501	8.52866e-13	-1.82351e-12	8.40277e-12	1.67324e-12	4.44709e-12	-9.34078e-14	-7.01788e-12	1.50266e-13	4.73138e-12	-3.14821e-10	-2.84055e-10	-2.65372e-10	-2.47062e-10	-2.46925e-10	-2.53053e-10	-2.77764e-10	-3.13332e-10	-3.62763e-10
0.03526	5.48272e-12	2.80634e-12	5.3162e-12	4.75981e-12	4.44709e-12	1.44988e-12	2.24182e-12	-4.47958e-12	-4.52832e-12	-3.11798e-10	-2.94631e-10	-2.57819e-10	-2.57601e-10	-2.454e-10	-2.48551e-10	-2.74714e-10	-3.13332e-10	-3.71813e-10
0.03551	3.93944e-12	4.34962e-12	6.85949e-12	1.29962e-13	-1.72604e-12	1.44988e-12	6.9854e-13	-2.9363e-12	-2.98503e-12	-3.17916e-10	-2.82512e-10	-2.65363e-10	-2.46989e-10	-2.46871e-10	-2.57665e-10	-2.73179e-10	-3.2093e-10	-3.61238e-10
0.03576	5.48272e-12	-1.82351e-12	3.77292e-12	7.84638e-12	4.44709e-12	6.07972e-12	6.9854e-13	-1.39302e-12	1.01532e-13	-3.23962e-10	-2.85462e-10	-2.59299e-10	-2.4698e-10	-2.39309e-10	-2.56176e-10	-2.74714e-10	-3.16428e-10	-3.68817e-10
0.03601	-6.90417e-13	-3.36679e-12	3.77292e-12	-4.49989e-12	-1.82758e-13	2.99316e-12	-2.38803e-12	-1.39302e-12	-4.52832e-12	-3.08766e-10	-2.80932e-10	-2.57719e-10	-2.5613e-10	-2.48396e-10	-2.53126e-10	-2.77755e-10	-3.20967e-10	-3.71859e-10
0.03626	2.39615e-12	2.80634e-12	2.22964e-12	-7.58646e-12	-1.82758e-13	2.99316e-12	5.32839e-12	-7.56615e-12	-6.0716e-12	-3.11743e-10	-2.85462e-10	-2.54687e-10	-2.56121e-10	-2.45418e-10	-2.54651e-10	-2.74714e-10	-3.19505e-10	-3.62726e-10
0.03651	-3.77698e-12	-1.82351e-12	-8.5693e-13	-9.12974e-12	-4.81261e-12	1.44988e-12	3.78511e-12	1.50266e-13	6.27467e-12	-3.1483e-10	-2.82457e-10	-2.59135e-10	-2.45473e-10	-2.48469e-10	-2.57737e-10	-2.73143e-10	-3.25587e-10	-3.62681e-10
0.03676	-3.77698e-12	-7.99665e-12	-8.57335e-12	-4.49989e-12	2.90381e-12	-7.80983e-12	2.24182e-12	-4.47958e-12	-6.0716e-12	-3.17907e-10	-2.85507e-10	-2.41025e-10	-2.50003e-10	-2.51482e-10	-2.62294e-10	-2.68631e-10	-3.24062e-10	-3.64206e-10
0.03701	-6.90417e-13	2.80634e-12	6.85949e-12	-1.41332e-12	7.53366e-12	2.99316e-12	2.24182e-12	1.69355e-12	4.73138e-12	-3.19432e-10	-2.88558e-10	-2.68304e-10	-2.53035e-10	-2.42405e-10	-2.56221e-10	-2.80759e-10	-3.17935e-10	-3.64197e-10
0.03726	-6.90417e-13	-2.80229e-13	-3.9435e-12	1.67324e-12	-3.26932e-12	4.53644e-12	5.32839e-12	-6.02287e-12	-6.0716e-12	-3.16364e-10	-2.85498e-10	-2.57865e-10	-2.45418e-10	-2.5151e-10	-2.56185e-10	-2.73225e-10	-3.14884e-10	-3.61192e-10
0.03751	8.52866e-13	-3.36679e-12	5.3162e-12	-2.95661e-12	2.90381e-12	-1.08964e-11	-7.01788e-12	4.78012e-12	-1.44175e-12	-3.11798e-10	-2.80914e-10	-2.69902e-10	-2.43902e-10	-2.53035e-10	-2.56203e-10	-2.76284e-10	-3.20967e-10	-3.68763e-10
0.037761	8.56928e-12	2.80634e-12	2.22964e-12	1.29962e-13	2.90381e-12	7.62301e-12	6.9854e-13	-6.02287e-12	-1.44175e-12	-3.16346e-10	-2.82394e-10	-2.53253e-10	-2.5298e-10	-2.43893e-10	-2.59226e-10	-2.85389e-10	-3.2103e-10	-3.62744e-10
0.038011	7.026e-12	1.26305e-12	-5.48678e-12	-7.58646e-12	5.99038e-12	-6.26654e-12	3.78511e-12	1.50266e-13	4.73138e-12	-3.164e-10	-2.79389e-10	-2.6224e-10	-2.42377e-10	-2.4383e-10	-2.54678e-10	-2.74823e-10	-3.25569e-10	-3.68827e-10
0.038261	-6.86355e-12	-2.80229e-13	6.85949e-12	-4.49989e-12	5.99038e-12	2.99316e-12	3.78511e-12	1.50266e-13	1.01532e-13	-3.20957e-10	-2.85489e-10	-2.51692e-10	-2.45373e-10	-2.42296e-10	-2.5613e-10	-2.83855e-10	-3.1946e-10	-3.71849e-10
0.038511	-6.90417e-13	4.34962e-12	6.85949e-12	-6.04317e-12	4.44709e-12	4.53644e-12	-3.93131e-12	4.78012e-12	3.1881e-12	-3.17944e-10	-2.88549e-10	-2.63783e-10	-2.46944e-10	-2.40843e-10	-2.48632e-10	-2.74832e-10	-3.13396e-10	-3.61201e-10
0.038761	-5.32027e-12	-2.80229e-13	6.86356e-13	6.30309e-12	-1.72604e-12	-4.72326e-12	6.9854e-13	4.78012e-12	-4.52832e-12	-3.19441e-10	-2.83964e-10	-2.56285e-10	-2.5151e-10	-2.54542e-10	-2.68304e-10	-2.86951e-10	-3.2556e-10	-3.62717e-10
0.039011	2.39615e-12	2.80634e-12	-8.57335e-12	-1.41332e-12	-1.82758e-13	-3.17998e-12	1.15015e-11	6.3234e-12	-2.98503e-12	-3.17871e-10	-2.79389e-10	-2.65363e-10	-2.48514e-10	-2.5161e-10	-2.50112e-10	-2.82403e-10	-3.25587e-10	-3.71795e-10
0.039261	8.52866e-13	-9.53993e-12	-5.48678e-12	-4.49989e-12	1.21635e-11	1.44988e-12	5.32839e-12	3.23684e-12	-2.98503e-12	-3.08757e-10	-2.83955e-10	-2.60842e-10	-2.53053e-10	-2.57646e-10	-2.4856e-10	-2.74777e-10	-3.17989e-10	-3.58169e-10
0.039511	-2.2337e-12	-9.53993e-12	2.22964e-12	1.29962e-13	-1.82758e-13	-9.34078e-14	2.24182e-12	-1.39302e-12	-4.52832e-12	-3.16319e-10	-2.87078e-10	-2.60824e-10	-2.50021e-10	-2.5003e-10	-2.62222e-10	-2.79262e-10	-3.22483e-10	-3.6574e-10
0.039761	8.52866e-13	-1.82351e-12	-2.40021e-12	1.29962e-13	-7.89918e-12	-1.63669e-12	3.78511e-12	-4.47958e-12	-6.0716e-12	-3.14839e-10	-2.94676e-10	-2.6234e-10	-2.48496e-10	-2.45418e-10	-2.53171e-10	-2.71727e-10	-3.16419e-10	-3.70315e-10
0.040011	-6.90417e-13	4.34962e-12	6.85949e-12	1.29962e-13	9.07694e-12	2.99316e-12	-2.38803e-12	-1.39302e-12	3.1881e-12	-3.14775e-10	-2.8706e-10	-2.60797e-10	-2.51528e-10	-2.46962e-10	-2.56167e-10	-2.82339e-10	-3.17935e-10	-3.62735e-10
0.040261	-2.2337e-12	-2.80229e-13	-8.5693e-13	7.84638e-12	2.90381e-12	4.53644e-12	3.78511e-12	-4.47958e-12	-1.44175e-12	-3.05725e-10	-2.80969e-10	-2.56267e-10	-2.49985e-10	-2.54542e-10	-2.56185e-10	-2.7928e-10	-3.22501e-10	-3.6574e-10
0.040511	-5.32027e-12	2.80634e-12	6.86356e-13	-2.95661e-12	-4.81261e-12	1.44988e-12	-8.44746e-13	1.50266e-13	3.1881e-12	-3.2241e-10	-2.90065e-10	-2.65354e-10	-2.43902e-10	-2.45446e-10	-2.56149e-10	-2.67115e-10	-3.1946e-10	-3.65795e-10
0.040761	3.93944e-12	-3.36679e-12	5.3162e-12	3.21653e-12	-1.72604e-12	1.44988e-12	3.78511e-12	-2.9363e-12	-9.15817e-12	-3.1641e-10	-2.87078e-10	-2.59308e-10	-2.48441e-10	-2.46898e-10	-2.50085e-10	-2.76239e-10	-3.16419e-10	-3.71895e-10
0.041011	2.39615e-12	7.43619e-12	2.22964e-12	1.29962e-13	1.36052e-12	-9.34078e-14	2.24182e-12	-1.39302e-12	3.1881e-12	-3.16328e-10	-2.88603e-10	-2.59272e-10	-2.48469e-10	-2.43866e-10	-2.56158e-10	-2.83891e-10	-3.20985e-10	-3.71904e-10
0.041262	5.48272e-12	-3.36679e-12	-2.40021e-12	-2.95661e-12	-1.82758e-13	-6.26654e-12	6.87167e-12	4.78012e-12	-2.98503e-12	-3.08684e-10	-2.91635e-10	-2.59281e-10	-2.48496e-10	-2.45355e-10	-2.57692e-10	-2.79353e-10	-3.22537e-10	-3.67301e-10
0.041512	8.52866e-13	2.80634e-12	6.86356e-13	-1.41332e-12	-1.82758e-13	2.99316e-12	-3.93131e-12	-1.39302e-12	1.64481e-12	-3.05607e-10	-2.87087e-10	-2.60806e-10	-2.52998e-10	-2.42314e-10	-2.5318e-10	-2.77773e-10	-3.22537e-10	-3.62744e-10
0.041762	2.39615e-12	-3.36679e-12	-2.40021e-12	3.21653e-12	7.53366e-12	1.44988e-12	-8.44746e-13	-1.39302e-12	1.64481e-12	-3.08657e-10	-2.88612e-10	-2.60806e-10	-2.40907e-10	-2.42323e-10	-2.62276e-10	-2.73234e-10	-3.21021e-10	-3.7037e-10
0.042012	-5.32027e-12	-2.80229e-13	6.86356e-13	3.21653e-12	1.36052e-12	4.53644e-12	6.9854e-13	-6.02287e-12	1.64481e-12	-3.11743e-10	-2.93169e-10	-2.59299e-10	-2.54514e-10	-2.46934e-10	-2.57701e-10	-2.80841e-10	-3.2251e-10	-3.74909e-10
0.042262	-3.77698e-12	1.26305e-12	-2.40021e-12	6.30309e-12	-1.72604e-12	1.44988e-12	6.9854e-13	-2.9363e-12	7.81795e-12	-3.14648e-10	-2.88558e-10	-2.62331e-10	-2.46962e-10	-2.53071e-10	-2.4856e-10	-2.82394e-10	-3.17889e-10	-3.6131e-10
0.042512	-5.32027e-12	-3.36679e-12	2.22964e-12	1.29962e-13	1.06202e-11	-3.17998e-12	6.9854e-13	-4.47958e-12	4.73138e-12	-2.87469e-10	-2.779e-10	-2.60833e-10	-2.45391e-10	-2.54578e-10	-2.54605e-10	-2.79362e-10	-3.08839e-10	-3.77922e-10
0.042762	-5.32027e-12	7.43619e-12	-2.40021e-12	1.29962e-13	9.07694e-12	-7.80983e-12	6.9854e-13	3.23684e-12	-9.15817e-12	-3.29926e-10	-2.85435e-10	-2.62349e-10	-2.45464e-10	-2.45446e-10	-2.54678e-10	-2.80832e-10	-3.30044e-10	-3.64288e-10
0.043012	-6.90417e-13	2.80634e-12	5.3162e-12	1.29962e-13	1.36052e-12	-9.35311e-12	5.32839e-12	-1.2196e-11	-1.44175e-12	-3.16428e-10	-2.80878e-10	-2.62349e-10	-2.59172e-10	-2.46925e-10	-2.60742e-10	-2.74805e-10	-3.14957e-10	-3.62699e-10
0.043262	7.026e-12	-3.36679e-12	-2.40021e-12	-1.41332e-12	-3.26932e-12	1.44988e-12	2.24182e-12	4.78012e-12	1.64481e-12	-3.11798e-10	-2.76339e-10	-2.60879e-10	-2.56221e-10	-2.48496e-10	-2.54705e-10	-2.85407e-10	-3.20976e-10	-3.65722e-10
0.043512	-1.14934e-11	-3.36679e-12	6.85949e-12	1.29962e-13	-7.89918e-12	-9.34078e-14	2.24182e-12	-2.9363e-12	1.64481e-12	-3.16355e-10	-2.86969e-10	-2.69965e-10	-2.59126e-10	-2.5456e-10	-2.59181e-10	-2.7938e-10	-3.22501e-10	-3.62672e-10
0.043762	3.93944e-12	4.34962e-12	-8.5693e-13	3.21653e-12	-1.72604e-12	-1.3983e-11	2.24182e-12	-2.9363e-12	-4.52832e-12	-3.1788e-10	-2.84001e-10	-2.60879e-10	-2.37975e-10	-2.46962e-10	-2.48596e-10	-2.80859e-10	-3.1641e-10	-3.59631e-10
0.044012	1.16559e-11	4.34962e-12	-3.9435e-12	-2.95661e-12	-1.72604e-12	1.44988e-12	3.78511e-12	1.69355e-12	4.73138e-12	-3.13359e-10	-2.87042e-10	-2.6234e-10	-2.6824e-10	-2.45373e-10	-2.59172e-10	-2.79334e-10	-3.16328e-10	-3.64224e-10
0.044262	2.39615e-12	-1.82351e-12	-3.9435e-12	1.29962e-13	-9.44246e-12	4.53644e-12	-3.93131e-12	-6.02287e-12	3.1881e-12	-3.2093e-10	-2.88567e-10	-2.60824e-10	-2.50076e-10	-2.4235e-10	-2.53144e-10	-2.77827e-10	-3.08757e-10	-3.70324e-10
0.044512	3.93944e-12	2.80634e-12	5.3162e-12	-1.41332e-12	4.44709e-12	-1.3983e-11	-8.44746e-13	3.23684e-12	6.27467e-12	-3.164e-10	-2.85471e-10	-2.60842e-10	-2.42423e-10	-2.48469e-10	-2.54633e-10	-2.82366e-10	-3.17862e-10	-3.65804e-10
0.044763	8.52866e-13	-1.82351e-12	3.77292e-12	1.29962e-13	-4.81261e-12	1.44988e-12	5.32839e-12	1.69355e-12	-2.98503e-12	-3.16319e-10	-2.76375e-10	-2.65399e-10	-2.56039e-10	-2.54605e-10	-2.54614e-10	-2.77846e-10	-3.1788e-10	-3.6879e-10
0.045013	-5.32027e-12	2.80634e-12	-2.40021e-12	-2.95661e-12	4.44709e-12	7.62301e-12	8.41496e-12	-4.47958e-12	9.36123e-12	-3.10125e-10	-2.90432e-10	-2.63077e-10	-2.44627e-10	-2.51603e-10	-2.43998e-10	-2.72039e-10	-2.95611e-10	-3.39088e-10
0.045263	2.40021e-11	7.43619e-12	5.3162e-12	-6.04317e-12	-3.26932e-12	-6.26654e-12	6.9854e-13	3.87324e-11	9.11553e-11	-8.0667e-10	-6.1161e-10	-3.80836e-10	-1.0675e-10	2.60087e-10	7.73655e-10	1.47235e-09	2.42832e-09	3.63977e-09
0.045513	-1.0409e-10	-7.12713e-11	-2.24629e-11	2.79091e-11	8.62411e-11	1.69668e-10	2.84663e-10	5.1252e-10	8.25758e-10	-9.6799e-10	-7.53692e-10	-4.39526e-10	-1.29377e-11	6.50498e-10	1.61246e-09	2.96981e-09	4.76148e-09	6.96566e-09
0.045763	-8.09412e-11	-5.42952e-11	-1.47465e-11	2.17359e-11	8.0068e-11	1.54235e-10	2.81576e-10	5.2178e-10	8.33475e-10	-9.27504e-10	-7.31598e-10	-4.45945e-10	-1.84557e-11	6.52809e-10	1.62814e-09	3.00328e-09	4.83964e-09	7.06195e-09
0.046013	-7.4768e-11	-4.34922e-11	-1.7833e-11	2.17359e-11	6.61784e-11	1.46519e-10	2.76946e-10	5.2178e-10	8.50451e-10	-8.84338e-10	-7.22229e-10	-4.41379e-10	-1.39623e-11	6.52827e-10	1.63435e-09	3.03557e-09	4.88754e-09	7.11911e-09
0.046263	-6.85949e-11	-4.50355e-11	-1.47465e-11	1.40195e-11	7.08083e-11	1.61951e-10	2.81576e-10	5.3104e-10	8.6434e-10	-8.47372e-10	-7.08331e-10	-4.36777e-10	-2.15423e-11	6.55905e-10	1.6421e-09	3.05576e-09	4.92923e-09	7.16706e-09
0.046513	-6.70516e-11	-4.04056e-11	-1.47465e-11	1.55628e-11	7.38949e-11	1.51148e-10	2.81576e-10	5.41843e-10	8.81316e-10	-8.2867e-10	-6.88423e-10	-4.36731e-10	-1.85103e-11	6.60489e-10	1.65751e-09	3.08497e-09	4.96783e-09	7.22408e-09
0.046763	-6.08785e-11	-4.96653e-11	-1.32032e-11	1.86494e-11	7.69814e-11	1.54235e-10	2.86206e-10	5.32583e-10	8.89033e-10	-7.97887e-10	-6.88259e-10	-4.33663e-10	-1.39168e-11	6.59009e-10	1.67749e-09	3.10506e-09	5.00639e-09	7.27655e-09
0.047013	-5.62486e-11	-3.7319e-11	-1.47465e-11	3.09956e-11	8.0068e-11	1.51148e-10	2.83119e-10	5.43386e-10	9.07552e-10	-7.68519e-10	-6.80543e-10	-4.30603e-10	-1.39441e-11	6.62069e-10	1.68685e-09	3.12059e-09	5.04193e-09	7.32296e-09
0.047263	-6.08785e-11	-4.04056e-11	-1.7833e-11	1.71061e-11	6.46352e-11	1.49605e-10	2.87749e-10	5.55732e-10	9.21442e-10	-7.33142e-10	-6.65264e-10	-4.32128e-10	-2.31038e-11	6.65155e-10	1.70211e-09	3.14823e-09	5.08194e-09	7.38297e-09
0.047513	-5.93352e-11	-3.26892e-11	-1.32032e-11	2.32792e-11	7.69814e-11	1.52692e-10	2.87749e-10	5.51102e-10	9.22985e-10	-7.11417e-10	-6.68105e-10	-4.35151e-10	-2.46379e-11	6.68296e-10	1.69472e-09	3.16376e-09	5.10683e-09	7.42627e-09
0.047763	-5.47053e-11	-4.04056e-11	-1.62898e-11	2.17359e-11	7.08083e-11	1.57322e-10	2.93922e-10	5.60362e-10	9.38418e-10	-6.83729e-10	-6.48261e-10	-4.29033e-10	-1.70489e-11	6.80488e-10	1.71913e-09	3.18375e-09	5.14981e-09	7.46794e-09
0.048013	-5.93352e-11	-3.7319e-11	-1.01166e-11	1.55628e-11	6.61784e-11	1.58865e-10	2.93922e-10	5.58819e-10	9.44591e-10	-6.65173e-10	-6.4196e-10	-4.2296e-10	-2.15878e-11	6.75995e-10	1.72842e-09	3.19624e-09	5.17162e-09	7.50798e-09
0.048263	-5.62486e-11	-3.88623e-11	-1.47465e-11	1.40195e-11	7.38949e-11	1.61951e-10	2.97009e-10	5.72708e-10	9.58481e-10	-6.49695e-10	-6.28144e-10	-4.33508e-10	-2.31129e-11	6.77474e-10	1.7285e-09	3.22537e-09	5.20692e-09	7.53281e-09
0.048514	-5.77919e-11	-3.42325e-11	-1.47465e-11	1.86494e-11	6.9265e-11	1.55778e-10	3.00096e-10	5.74252e-10	9.69284e-10	-6.29687e-10	-6.18902e-10	-4.18403e-10	-1.85558e-11	6.74479e-10	1.73162e-09	3.23938e-09	5.22256e-09	7.56518e-09
0.048764	-5.47053e-11	-3.7319e-11	-1.93763e-11	1.09329e-11	7.23516e-11	1.54235e-10	2.93922e-10	5.80425e-10	9.70827e-10	-6.14209e-10	-6.1725e-10	-4.32019e-10	-2.00445e-11	6.82086e-10	1.74387e-09	3.25782e-09	5.25324e-09	7.59761e-09
0.049014	-5.77919e-11	-2.6516e-11	-1.01166e-11	9.38966e-12	6.30919e-11	1.66581e-10	3.10899e-10	5.95858e-10	9.77e-10	-5.95717e-10	-6.05004e-10	-4.29069e-10	-1.85194e-11	6.82095e-10	1.75015e-09	3.26719e-09	5.26739e-09	7.6346e-09
0.049264	-4.08158e-11	-3.26892e-11	-1.47465e-11	1.86494e-11	6.61784e-11	1.52692e-10	3.03182e-10	5.86598e-10	9.95519e-10	-5.78768e-10	-5.98821e-10	-4.32074e-10	-1.69943e-11	6.76022e-10	1.76692e-09	3.28714e-09	5.30863e-09	7.66696e-09
0.049514	-4.85322e-11	-3.7319e-11	-1.47465e-11	1.55628e-11	7.38949e-11	1.60408e-10	3.10899e-10	5.97401e-10	9.93976e-10	-5.67901e-10	-5.97223e-10	-4.27471e-10	-1.85376e-11	6.80588e-10	1.761e-09	3.29802e-09	5.30607e-09	7.68712e-09
0.049764	-5.31621e-11	-3.42325e-11	-1.7833e-11	1.40195e-11	7.54381e-11	1.63495e-10	3.07812e-10	5.85055e-10	1.0233e-09	-5.52505e-10	-5.91041e-10	-4.19746e-10	-2.30765e-11	6.85245e-10	1.77467e-09	3.31341e-09	5.3473e-09	7.71188e-09
0.050014	-4.85322e-11	-3.11459e-11	-1.47465e-11	1.71061e-11	7.85247e-11	1.60408e-10	3.18615e-10	5.91228e-10	9.98606e-10	-5.38588e-10	-5.78804e-10	-4.07663e-10	-1.55238e-11	6.94387e-10	1.77027e-09	3.32588e-09	5.35991e-09	7.75183e-09
0.050264	-4.69889e-11	-3.7319e-11	-1.62898e-11	1.71061e-11	7.08083e-11	1.60408e-10	3.09355e-10	5.97401e-10	1.01558e-09	-5.21675e-10	-5.78713e-10	-4.34915e-10	-2.31038e-11	6.88377e-10	1.78707e-09	3.35495e-09	5.38594e-09	7.77819e-09
0.050514	-4.39024e-11	-3.11459e-11	-2.09196e-11	1.71061e-11	7.69814e-11	1.58865e-10	3.06269e-10	6.02031e-10	1.03256e-09	-5.12352e-10	-5.7559e-10	-4.13727e-10	-2.3122e-11	6.94414e-10	1.79488e-09	3.35972e-09	5.39239e-09	7.81048e-09
0.050764	-3.92725e-11	-2.96026e-11	-1.47465e-11	2.32792e-11	7.23516e-11	1.68124e-10	3.17072e-10	6.11291e-10	1.0341e-09	-5.00006e-10	-5.63417e-10	-4.136e-10	-1.85922e-11	6.89966e-10	1.80867e-09	3.36287e-09	5.42462e-09	7.83057e-09
0.051014	-5.00755e-11	-3.42325e-11	-5.48678e-12	1.71061e-11	7.08083e-11	1.68124e-10	3.10899e-10	6.19007e-10	1.0341e-09	-4.84627e-10	-5.70869e-10	-4.13618e-10	-2.61812e-11	7.0518e-10	1.81332e-09	3.37517e-09	5.45385e-09	7.84147e-09
0.051264	-4.54456e-11	-3.57757e-11	-1.47465e-11	1.55628e-11	7.69814e-11	1.72754e-10	3.17072e-10	6.2055e-10	1.05416e-09	-4.75313e-10	-5.54112e-10	-4.16668e-10	-2.46925e-11	7.0381e-10	1.81191e-09	3.38901e-09	5.46321e-09	7.86007e-09
0.051514	-5.00755e-11	-4.04056e-11	-2.40062e-11	2.32792e-11	6.30919e-11	1.78927e-10	3.20158e-10	6.14377e-10	1.04336e-09	-4.63012e-10	-5.49372e-10	-4.16677e-10	-2.31493e-11	7.1444e-10	1.82571e-09	3.39531e-09	5.47106e-09	7.89982e-09
0.051764	-5.31621e-11	-3.42325e-11	-1.32032e-11	2.01926e-11	7.85247e-11	1.71211e-10	3.24788e-10	6.09747e-10	1.05416e-09	-4.55287e-10	-5.38688e-10	-4.15161e-10	-2.16151e-11	7.08376e-10	1.84096e-09	3.41521e-09	5.49866e-09	7.89869e-09
0.052015	-5.47053e-11	-3.26892e-11	-5.48678e-12	1.40195e-11	7.54381e-11	1.71211e-10	3.35591e-10	6.26723e-10	1.06342e-09	-4.50593e-10	-5.41711e-10	-4.16659e-10	-2.16515e-11	7.03792e-10	1.82743e-09	3.42307e-09	5.51562e-09	7.92479e-09
0.052265	-5.16188e-11	-3.26892e-11	-7.03006e-12	2.48225e-11	7.69814e-11	1.74298e-10	3.32504e-10	6.2055e-10	1.06805e-09	-4.38338e-10	-5.47693e-10	-4.13609e-10	-2.92314e-11	7.08349e-10	1.84408e-09	3.44142e-09	5.52043e-09	7.95554e-09
0.052515	-4.69889e-11	-3.57757e-11	-1.7833e-11	9.38966e-12	7.08083e-11	1.72754e-10	3.35591e-10	6.40613e-10	1.07114e-09	-4.33681e-10	-5.24898e-10	-4.12038e-10	-2.16606e-11	7.0992e-10	1.83663e-09	3.44315e-09	5.5418e-09	7.97261e-09
0.052765	-4.85322e-11	-2.6516e-11	-1.47465e-11	1.09329e-11	6.9265e-11	1.72754e-10	3.34048e-10	6.37526e-10	1.0696e-09	-4.32074e-10	-5.32351e-10	-4.07445e-10	-2.31675e-11	7.12961e-10	1.85039e-09	3.45845e-09	5.54209e-09	7.99114e-09
0.053015	-4.54456e-11	-3.57757e-11	-1.16599e-11	1.55628e-11	6.77217e-11	1.74298e-10	3.38678e-10	6.37526e-10	1.07268e-09	-4.22905e-10	-5.26287e-10	-4.05893e-10	-2.77518e-11	7.10001e-10	1.86265e-09	3.46616e-09	5.56805e-09	8.0127e-09
0.053265	-4.23591e-11	-2.96026e-11	-8.57335e-12	1.86494e-11	8.0068e-11	1.68124e-10	3.37134e-10	6.42156e-10	1.07268e-09	-4.21253e-10	-5.24707e-10	-4.05884e-10	-2.77791e-11	7.22084e-10	1.85972e-09	3.46473e-09	5.57439e-09	8.02973e-09
0.053515	-4.39024e-11	-3.26892e-11	-1.32032e-11	2.01926e-11	7.38949e-11	1.75841e-10	3.37134e-10	6.52959e-10	1.0912e-09	-4.08943e-10	-5.21612e-10	-4.05884e-10	-2.77154e-11	7.0549e-10	1.86736e-09	3.47242e-09	5.58978e-09	8.05128e-09
0.053765	-5.16188e-11	-3.11459e-11	-8.57335e-12	1.71061e-11	7.38949e-11	1.75841e-10	3.41764e-10	6.3907e-10	1.08812e-09	-3.92185e-10	-5.15475e-10	-4.05865e-10	-1.70398e-11	7.23663e-10	1.87356e-09	3.48627e-09	5.60668e-09	8.06828e-09
0.054015	-4.54456e-11	-3.57757e-11	-1.01166e-11	1.55628e-11	7.08083e-11	1.74298e-10	3.40221e-10	6.42156e-10	1.10201e-09	-4.07236e-10	-5.12343e-10	-4.02833e-10	-1.70398e-11	7.19161e-10	1.88124e-09	3.49858e-09	5.61142e-09	8.08375e-09
0.054265	-4.39024e-11	-3.11459e-11	-5.48678e-12	1.55628e-11	7.38949e-11	1.72754e-10	3.37134e-10	6.57589e-10	1.11127e-09	-3.90533e-10	-5.04636e-10	-4.05856e-10	-2.76244e-11	7.13097e-10	1.88434e-09	3.50327e-09	5.62216e-09	8.10532e-09
0.054515	-5.16188e-11	-3.26892e-11	-1.01166e-11	1.40195e-11	7.69814e-11	1.77384e-10	3.37134e-10	6.60676e-10	1.09275e-09	-3.87291e-10	-4.93924e-10	-4.04368e-10	-1.24646e-11	7.23682e-10	1.88587e-09	3.51098e-09	5.62996e-09	8.12533e-09
0.054765	-4.23591e-11	-2.34295e-11	-1.47465e-11	2.01926e-11	7.23516e-11	1.77384e-10	3.49481e-10	6.57589e-10	1.11898e-09	-3.72004e-10	-4.95385e-10	-4.07409e-10	-1.6967e-11	7.14649e-10	1.88441e-09	3.52019e-09	5.6484e-09	8.13616e-09
0.055015	-4.39024e-11	-3.42325e-11	-1.01166e-11	2.01926e-11	7.38949e-11	1.74298e-10	3.41764e-10	6.62219e-10	1.11127e-09	-3.68899e-10	-4.9544e-10	-4.074e-10	-2.00354e-11	7.23736e-10	1.89358e-09	3.52338e-09	5.66381e-09	8.14242e-09
0.055265	-3.46427e-11	-3.11459e-11	-1.7833e-11	1.71061e-11	6.9265e-11	1.72754e-10	3.43307e-10	6.56046e-10	1.12824e-09	-3.74918e-10	-5.0301e-10	-4.02806e-10	-1.85649e-11	7.22302e-10	1.89831e-09	3.53714e-09	5.67314e-09	8.15784e-09
0.055516	-4.85322e-11	-3.11459e-11	-1.62898e-11	1.71061e-11	7.08083e-11	1.86644e-10	3.46394e-10	6.57589e-10	1.12207e-09	-3.64179e-10	-4.93823e-10	-3.9972e-10	-2.4647e-11	7.28375e-10	1.91505e-09	3.54032e-09	5.68696e-09	8.18091e-09
0.055766	-4.08158e-11	-3.11459e-11	-1.16599e-11	2.17359e-11	6.77217e-11	1.83557e-10	3.43307e-10	6.80738e-10	1.12979e-09	-3.47475e-10	-4.80189e-10	-3.98194e-10	-2.31947e-11	7.25389e-10	1.90453e-09	3.54802e-09	5.69476e-09	8.19792e-09
0.056016	-4.23591e-11	-2.6516e-11	-1.47465e-11	1.55628e-11	7.38949e-11	1.83557e-10	3.51024e-10	6.76108e-10	1.1375e-09	-3.70151e-10	-5.04408e-10	-4.01236e-10	-2.92405e-11	7.29928e-10	1.9136e-09	3.55722e-09	5.71013e-09	8.21489e-09
0.056266	-3.92725e-11	-2.6516e-11	-8.57335e-12	2.01926e-11	7.38949e-11	1.75841e-10	3.43307e-10	6.74565e-10	1.12516e-09	-3.53448e-10	-4.87741e-10	-4.01281e-10	-2.16697e-11	7.26932e-10	1.9106e-09	3.5589e-09	5.72251e-09	8.23029e-09
0.056516	-3.61859e-11	-2.96026e-11	-1.16599e-11	1.40195e-11	8.0068e-11	1.75841e-10	3.5411e-10	6.62219e-10	1.14213e-09	-3.427e-10	-4.81504e-10	-4.05793e-10	-2.46379e-11	7.31498e-10	1.91066e-09	3.57572e-09	5.73787e-09	8.23808e-09
0.056766	-5.16188e-11	-3.26892e-11	-1.01166e-11	2.01926e-11	7.08083e-11	1.86644e-10	3.52567e-10	6.71479e-10	1.12824e-09	-3.47166e-10	-4.75386e-10	-3.95235e-10	-1.85103e-11	7.33041e-10	1.92284e-09	3.58041e-09	5.74416e-09	8.25041e-09
0.057016	-3.46427e-11	-2.49728e-11	-1.32032e-11	1.71061e-11	7.54381e-11	1.75841e-10	3.55654e-10	6.74565e-10	1.13596e-09	-3.39531e-10	-4.78381e-10	-4.10341e-10	-1.10123e-11	7.31616e-10	1.91992e-09	3.58354e-09	5.761e-09	8.26581e-09
0.057266	-3.46427e-11	-3.11459e-11	-1.01166e-11	1.55628e-11	6.61784e-11	1.78927e-10	3.5874e-10	6.85368e-10	1.14367e-09	-3.33395e-10	-4.75322e-10	-3.96769e-10	-3.83273e-11	7.46849e-10	1.92908e-09	3.59274e-09	5.76574e-09	8.27819e-09
0.057516	-4.85322e-11	-2.18862e-11	-7.03006e-12	1.86494e-11	7.54381e-11	1.86644e-10	3.60284e-10	6.88455e-10	1.14676e-09	-3.34883e-10	-4.70729e-10	-4.07254e-10	-2.32493e-11	7.45324e-10	1.93371e-09	3.59746e-09	5.77649e-09	8.29358e-09
0.057766	-4.69889e-11	-3.7319e-11	-1.47465e-11	1.71061e-11	7.69814e-11	1.72754e-10	3.5874e-10	6.86911e-10	1.15139e-09	-3.34856e-10	-4.70647e-10	-3.89135e-10	-2.46925e-11	7.30091e-10	1.93382e-09	3.61274e-09	5.78423e-09	8.30448e-09
0.058016	-5.00755e-11	-3.57757e-11	-1.32032e-11	1.86494e-11	6.77217e-11	1.85101e-10	3.61827e-10	6.85368e-10	1.15602e-09	-3.28719e-10	-4.61533e-10	-4.08825e-10	-2.62176e-11	7.34612e-10	1.94746e-09	3.61291e-09	5.79195e-09	8.32751e-09
0.058266	-4.39024e-11	-2.49728e-11	-2.40021e-12	1.09329e-11	7.85247e-11	1.88187e-10	3.61827e-10	6.85368e-10	1.15756e-09	-3.22583e-10	-4.67506e-10	-4.04322e-10	-2.47107e-11	7.40731e-10	1.93386e-09	3.62664e-09	5.80118e-09	8.34295e-09
0.058516	-3.77292e-11	-2.49728e-11	-1.47465e-11	2.01926e-11	6.77217e-11	1.83557e-10	3.61827e-10	6.93085e-10	1.15911e-09	-3.22519e-10	-4.55351e-10	-3.96651e-10	-2.61903e-11	7.39269e-10	1.94148e-09	3.62827e-09	5.80586e-09	8.35226e-09
0.058766	-4.54456e-11	-2.49728e-11	-1.01166e-11	2.01926e-11	7.69814e-11	1.86644e-10	3.60284e-10	6.91541e-10	1.15756e-09	-3.17962e-10	-4.56821e-10	-3.93592e-10	-2.00809e-11	7.43863e-10	1.95379e-09	3.63145e-09	5.81517e-09	8.36305e-09
0.059016	-3.92725e-11	-2.96026e-11	-1.32032e-11	1.40195e-11	6.77217e-11	1.86644e-10	3.5874e-10	6.99258e-10	1.16065e-09	-3.20921e-10	-4.59844e-10	-3.99629e-10	-1.70307e-11	7.48456e-10	1.96449e-09	3.65125e-09	5.83812e-09	8.37389e-09
0.059267	-4.23591e-11	-2.80593e-11	-1.32032e-11	1.40195e-11	7.23516e-11	1.86644e-10	3.6337e-10	6.97714e-10	1.15756e-09	-3.10264e-10	-4.53798e-10	-3.92094e-10	-2.3122e-11	7.46995e-10	1.95699e-09	3.64526e-09	5.8414e-09	8.39078e-09
0.059517	-4.23591e-11	-3.26892e-11	-1.32032e-11	1.40195e-11	7.08083e-11	1.88187e-10	3.55654e-10	6.99258e-10	1.17145e-09	-3.10182e-10	-4.59798e-10	-4.01172e-10	-2.46652e-11	7.53059e-10	1.9676e-09	3.64378e-09	5.85661e-09	8.39857e-09
0.059767	-3.92725e-11	-2.80593e-11	-1.7833e-11	1.55628e-11	7.08083e-11	1.88187e-10	3.6337e-10	7.05431e-10	1.17454e-09	-3.07141e-10	-4.49159e-10	-3.96606e-10	-2.16879e-11	7.48538e-10	1.96462e-09	3.65752e-09	5.84614e-09	8.40934e-09
0.060017	-5.00755e-11	-2.80593e-11	-1.01166e-11	1.71061e-11	8.62411e-11	1.88187e-10	3.6337e-10	6.94628e-10	1.17917e-09	-3.08639e-10	-4.49068e-10	-3.88998e-10	-3.22998e-11	7.51579e-10	1.96469e-09	3.66067e-09	5.86599e-09	8.41863e-09
0.060267	-5.00755e-11	-2.80593e-11	-1.01166e-11	2.32792e-11	7.38949e-11	1.95904e-10	3.68e-10	7.08517e-10	1.17763e-09	-3.07132e-10	-4.44548e-10	-3.96569e-10	-2.47016e-11	7.54666e-10	1.98e-09	3.66378e-09	5.88135e-09	8.43094e-09
0.060517	-5.16188e-11	-2.96026e-11	-1.32032e-11	1.55628e-11	8.16113e-11	1.91274e-10	3.64913e-10	7.13147e-10	1.19923e-09	-3.08602e-10	-4.53625e-10	-3.95081e-10	-1.85558e-11	7.57707e-10	1.98918e-09	3.67152e-09	5.87997e-09	8.44021e-09
0.060767	-4.54456e-11	-3.11459e-11	-1.7833e-11	2.63658e-11	6.9265e-11	1.86644e-10	3.68e-10	6.94628e-10	1.18843e-09	-3.01013e-10	-4.46018e-10	-3.93601e-10	-1.85285e-11	7.53168e-10	1.98011e-09	3.68682e-09	5.88916e-09	8.44803e-09
0.061017	-5.16188e-11	-2.6516e-11	-8.57335e-12	1.71061e-11	7.85247e-11	1.9436e-10	3.75716e-10	7.10061e-10	1.18534e-09	-3.05461e-10	-4.39881e-10	-4.02651e-10	-2.00809e-11	7.56154e-10	1.98311e-09	3.68842e-09	5.89688e-09	8.47247e-09
0.061267	-4.69889e-11	-2.80593e-11	-1.16599e-11	1.71061e-11	8.0068e-11	1.8973e-10	3.7263e-10	7.14691e-10	1.20386e-09	-2.91799e-10	-4.41334e-10	-3.87492e-10	-2.46379e-11	7.50109e-10	1.9847e-09	3.68551e-09	5.90314e-09	8.47126e-09
0.061517	-3.92725e-11	-2.80593e-11	-1.16599e-11	1.55628e-11	7.23516e-11	1.88187e-10	3.66457e-10	7.1932e-10	1.20541e-09	-2.97872e-10	-4.35206e-10	-3.93474e-10	-2.01082e-11	7.56191e-10	1.99236e-09	3.70688e-09	5.92305e-09	8.49873e-09
0.061767	-4.54456e-11	-2.96026e-11	-1.47465e-11	1.24762e-11	8.0068e-11	1.91274e-10	3.74173e-10	7.20864e-10	1.18534e-09	-3.0695e-10	-4.29078e-10	-3.88944e-10	-2.3122e-11	7.59214e-10	1.99695e-09	3.71309e-09	5.93081e-09	8.5035e-09
0.062017	-4.23591e-11	-2.96026e-11	-1.32032e-11	1.40195e-11	7.54381e-11	1.92817e-10	3.80346e-10	7.20864e-10	1.1946e-09	-2.88794e-10	-4.30594e-10	-3.90423e-10	-2.16151e-11	7.48638e-10	1.99246e-09	3.71166e-09	5.93392e-09	8.5097e-09
0.062267	-4.39024e-11	-2.03429e-11	-1.01166e-11	2.63658e-11	7.08083e-11	1.92817e-10	3.74173e-10	7.1932e-10	1.19306e-09	-3.03954e-10	-4.3517e-10	-3.87391e-10	-2.15969e-11	7.62264e-10	2.00154e-09	3.72079e-09	5.93706e-09	8.52198e-09
0.062517	-4.69889e-11	-2.34295e-11	-1.7833e-11	1.09329e-11	7.38949e-11	1.91274e-10	3.69543e-10	7.1932e-10	1.19769e-09	-3.07032e-10	-4.33626e-10	-3.88926e-10	-2.00627e-11	7.56318e-10	1.99401e-09	3.71934e-09	5.94784e-09	8.52817e-09
0.062768	-4.69889e-11	-2.34295e-11	-1.01166e-11	3.09956e-11	7.38949e-11	1.91274e-10	3.78803e-10	7.30123e-10	1.19923e-09	-2.9642e-10	-4.25964e-10	-3.93492e-10	-1.85831e-11	7.68428e-10	2.00161e-09	3.72239e-09	5.96321e-09	8.53142e-09
0.063018	-4.23591e-11	-3.42325e-11	-1.16599e-11	1.40195e-11	6.9265e-11	2.0362e-10	3.75716e-10	7.3321e-10	1.20849e-09	-3.03927e-10	-4.21371e-10	-3.90451e-10	-2.77336e-11	7.59396e-10	2.00472e-09	3.724e-09	5.97253e-09	8.55886e-09
0.063268	-4.69889e-11	-3.11459e-11	-1.47465e-11	1.55628e-11	6.9265e-11	1.91274e-10	3.7726e-10	7.25493e-10	1.18689e-09	-2.94749e-10	-4.25937e-10	-3.87473e-10	-2.92769e-11	7.66939e-10	2.00623e-09	3.73469e-09	5.98481e-09	8.55454e-09
0.063518	-4.23591e-11	-2.49728e-11	-1.01166e-11	1.86494e-11	8.31545e-11	1.91274e-10	3.74173e-10	7.25493e-10	1.20232e-09	-2.8253e-10	-4.29015e-10	-4.02624e-10	-2.32493e-11	7.62382e-10	2.0017e-09	3.73633e-09	5.98946e-09	8.56985e-09
0.063768	-4.54456e-11	-2.34295e-11	-1.47465e-11	2.63658e-11	6.9265e-11	1.92817e-10	3.8189e-10	7.27037e-10	1.20695e-09	-2.88521e-10	-4.28996e-10	-3.8898e-10	-3.38158e-11	7.57807e-10	2.00784e-09	3.74398e-09	5.99106e-09	8.5852e-09
0.064018	-4.69889e-11	-2.6516e-11	-1.7833e-11	2.17359e-11	7.69814e-11	1.8973e-10	3.7263e-10	7.3321e-10	1.22238e-09	-2.82421e-10	-4.22851e-10	-3.8741e-10	-2.1697e-11	7.62364e-10	2.01857e-09	3.74712e-09	5.99867e-09	8.58688e-09
0.064268	-4.39024e-11	-2.96026e-11	-7.03006e-12	1.71061e-11	7.54381e-11	1.9436e-10	3.78803e-10	7.3321e-10	1.20695e-09	-2.76348e-10	-4.15198e-10	-3.9351e-10	-2.46652e-11	7.63962e-10	2.0217e-09	3.75477e-09	5.99424e-09	8.59761e-09
0.064518	-4.54456e-11	-3.11459e-11	-1.16599e-11	2.17359e-11	7.54381e-11	1.95904e-10	3.8189e-10	7.31667e-10	1.20849e-09	-2.86905e-10	-4.16659e-10	-3.94944e-10	-2.31311e-11	7.71624e-10	2.02472e-09	3.75647e-09	6.01097e-09	8.60379e-09
0.064768	-5.00755e-11	-4.04056e-11	-8.57335e-12	1.40195e-11	8.16113e-11	1.97447e-10	3.7726e-10	7.16234e-10	1.20695e-09	-2.73298e-10	-4.13627e-10	-3.73648e-10	-1.86195e-11	7.76181e-10	2.01724e-09	3.77776e-09	6.00812e-09	8.60701e-09
0.065018	-5.16188e-11	-3.26892e-11	-1.32032e-11	2.32792e-11	6.77217e-11	1.88187e-10	3.84976e-10	7.30123e-10	1.22238e-09	-2.82321e-10	-4.15116e-10	-3.81146e-10	-3.07747e-11	7.6556e-10	2.03838e-09	3.76575e-09	6.02493e-09	8.63001e-09
0.065268	-4.39024e-11	-2.49728e-11	-1.32032e-11	1.71061e-11	7.08083e-11	1.95904e-10	3.78803e-10	7.2858e-10	1.21621e-09	-2.74732e-10	-4.12129e-10	-3.81209e-10	-2.77518e-11	7.70026e-10	2.00962e-09	3.77642e-09	6.0342e-09	8.64691e-09
0.065518	-4.54456e-11	-2.34295e-11	-7.03006e-12	1.40195e-11	8.77844e-11	1.9436e-10	3.89606e-10	7.2858e-10	1.21775e-09	-2.71682e-10	-4.21216e-10	-3.84241e-10	-2.01446e-11	7.625e-10	2.02473e-09	3.78865e-09	6.03737e-09	8.64557e-09
0.065768	-4.23591e-11	-3.11459e-11	-1.47465e-11	1.40195e-11	7.85247e-11	2.02077e-10	3.80346e-10	7.34753e-10	1.20386e-09	-2.79307e-10	-4.13664e-10	-3.81282e-10	-2.6163e-11	7.74683e-10	2.03093e-09	3.78274e-09	6.04808e-09	8.6594e-09
0.066018	-4.54456e-11	-2.96026e-11	-7.03006e-12	7.84638e-12	8.31545e-11	1.92817e-10	3.95779e-10	7.2858e-10	1.21621e-09	-2.82321e-10	-4.16641e-10	-3.93437e-10	-2.01719e-11	7.79276e-10	2.03249e-09	3.80248e-09	6.05123e-09	8.67934e-09
0.066269	-4.23591e-11	-2.49728e-11	-1.47465e-11	1.09329e-11	7.85247e-11	1.91274e-10	3.83433e-10	7.3321e-10	1.22238e-09	-2.68659e-10	-4.12066e-10	-3.88898e-10	-3.23089e-11	7.7018e-10	2.03093e-09	3.79353e-09	6.05741e-09	8.68553e-09
0.066519	-5.00755e-11	-2.96026e-11	-8.57335e-12	1.71061e-11	8.16113e-11	2.00533e-10	3.94236e-10	7.3784e-10	1.20849e-09	-2.76175e-10	-4.0897e-10	-3.82789e-10	-2.77609e-11	7.74665e-10	2.02491e-09	3.80723e-09	6.06662e-09	8.67964e-09
0.066769	-3.92725e-11	-3.42325e-11	-1.01166e-11	1.71061e-11	8.0068e-11	1.97447e-10	3.97322e-10	7.50186e-10	1.2193e-09	-2.71645e-10	-4.05911e-10	-3.85775e-10	-2.01537e-11	7.68592e-10	2.0386e-09	3.81345e-09	6.07127e-09	8.71006e-09
0.067019	-5.62486e-11	-2.03429e-11	-3.9435e-12	1.40195e-11	8.16113e-11	1.9899e-10	3.94236e-10	7.34753e-10	1.2193e-09	-2.71591e-10	-4.07427e-10	-3.81227e-10	-2.77154e-11	7.68564e-10	2.04023e-09	3.81962e-09	6.0744e-09	8.70121e-09
0.067269	-3.30994e-11	-1.57131e-11	-1.62898e-11	1.55628e-11	7.54381e-11	1.9899e-10	4.00409e-10	7.45556e-10	1.21775e-09	-2.67034e-10	-4.0897e-10	-3.82671e-10	-2.47198e-11	7.70071e-10	2.04329e-09	3.82426e-09	6.08361e-09	8.72247e-09
0.067519	-4.23591e-11	-2.80593e-11	-1.01166e-11	2.01926e-11	7.38949e-11	1.97447e-10	3.94236e-10	7.47099e-10	1.23781e-09	-2.7002e-10	-4.10432e-10	-3.7362e-10	-2.62358e-11	7.67057e-10	2.04333e-09	3.82885e-09	6.09128e-09	8.71505e-09
0.067769	-4.39024e-11	-2.03429e-11	-1.16599e-11	1.86494e-11	7.85247e-11	1.91274e-10	3.92693e-10	7.45556e-10	1.22393e-09	-2.63983e-10	-3.9824e-10	-3.88789e-10	-2.77063e-11	7.7156e-10	2.04633e-09	3.82733e-09	6.08834e-09	8.72875e-09
0.068019	-4.54456e-11	-2.34295e-11	-8.57335e-12	4.75981e-12	7.54381e-11	2.00533e-10	3.91149e-10	7.44013e-10	1.22084e-09	-2.71536e-10	-3.98167e-10	-3.84305e-10	-1.70762e-11	7.625e-10	2.03878e-09	3.8243e-09	6.10052e-09	8.73194e-09
0.068269	-5.62486e-11	-3.11459e-11	-1.16599e-11	1.55628e-11	7.69814e-11	1.9899e-10	3.97322e-10	7.47099e-10	1.23936e-09	-2.65463e-10	-3.98167e-10	-3.84278e-10	-2.31311e-11	7.73112e-10	2.04786e-09	3.82895e-09	6.09907e-09	8.74275e-09
0.068519	-4.69889e-11	-2.6516e-11	-3.9435e-12	1.86494e-11	7.85247e-11	2.02077e-10	3.83433e-10	7.34753e-10	1.22547e-09	-2.6234e-10	-3.98149e-10	-3.84268e-10	-2.62176e-11	7.71642e-10	2.0434e-09	3.84419e-09	6.10071e-09	8.76263e-09
0.068769	-3.61859e-11	-2.80593e-11	-2.40021e-12	1.24762e-11	8.46978e-11	2.00533e-10	4.01952e-10	7.48643e-10	1.24399e-09	-2.56176e-10	-3.9509e-10	-3.82725e-10	-2.6254e-11	7.70171e-10	2.05406e-09	3.83821e-09	6.12054e-09	8.75979e-09
0.069019	-3.92725e-11	-2.80593e-11	-1.32032e-11	1.86494e-11	7.23516e-11	1.91274e-10	3.94236e-10	7.54816e-10	1.23473e-09	-2.48596e-10	-3.93628e-10	-3.79684e-10	-2.93224e-11	7.8081e-10	2.05564e-09	3.84275e-09	6.12075e-09	8.77501e-09
0.069269	-3.92725e-11	-2.96026e-11	-1.32032e-11	1.55628e-11	7.23516e-11	1.97447e-10	4.00409e-10	7.50186e-10	1.23781e-09	-2.62204e-10	-4.07263e-10	-3.8268e-10	-3.23089e-11	7.76335e-10	2.05567e-09	3.84289e-09	6.13599e-09	8.77371e-09
0.069519	-5.77919e-11	-2.03429e-11	-1.01166e-11	1.24762e-11	7.54381e-11	1.9899e-10	3.92693e-10	7.51729e-10	1.2301e-09	-2.50158e-10	-3.93656e-10	-3.76579e-10	-1.86195e-11	7.8239e-10	2.05871e-09	3.86116e-09	6.13307e-09	8.79655e-09
0.069769	-3.77292e-11	-2.03429e-11	-8.57335e-12	2.17359e-11	8.0068e-11	2.0362e-10	4.05039e-10	7.50186e-10	1.24553e-09	-2.62194e-10	-3.99656e-10	-3.73538e-10	-2.16151e-11	7.79322e-10	2.05724e-09	3.8567e-09	6.14073e-09	8.7922e-09
0.07002	-5.00755e-11	-3.11459e-11	-1.62898e-11	2.17359e-11	7.69814e-11	2.02077e-10	3.92693e-10	7.60989e-10	1.22701e-09	-2.47062e-10	-3.96578e-10	-3.81082e-10	-2.61539e-11	7.70208e-10	2.06335e-09	3.85823e-09	6.14845e-09	8.80594e-09
0.07027	-3.61859e-11	-2.34295e-11	-1.32032e-11	1.55628e-11	8.46978e-11	1.91274e-10	3.95779e-10	7.54816e-10	1.24553e-09	-2.54596e-10	-3.8593e-10	-3.70515e-10	-1.71581e-11	7.79322e-10	2.06647e-09	3.86282e-09	6.15766e-09	8.81372e-09
0.07052	-5.00755e-11	-1.87996e-11	-1.16599e-11	1.86494e-11	7.38949e-11	1.97447e-10	3.97322e-10	7.64076e-10	1.26714e-09	-2.54569e-10	-3.93501e-10	-3.81036e-10	-3.83728e-11	7.82399e-10	2.07106e-09	3.86446e-09	6.16085e-09	8.82608e-09
0.07077	-4.54456e-11	-2.6516e-11	-2.40021e-12	1.55628e-11	7.23516e-11	2.09793e-10	4.01952e-10	7.56359e-10	1.25016e-09	-2.4245e-10	-3.95053e-10	-3.6594e-10	-2.47926e-11	7.77842e-10	2.07112e-09	3.87971e-09	6.17459e-09	8.84597e-09
0.07102	-4.39024e-11	-2.6516e-11	-1.32032e-11	1.40195e-11	8.0068e-11	1.80471e-10	3.95779e-10	7.59446e-10	1.25633e-09	-2.56058e-10	-3.91994e-10	-3.811e-10	-2.77427e-11	7.77833e-10	2.0772e-09	3.87834e-09	6.17318e-09	8.8446e-09
0.07127	-3.92725e-11	-2.6516e-11	-1.32032e-11	1.55628e-11	7.69814e-11	1.95904e-10	4.03496e-10	7.65619e-10	1.24707e-09	-2.48487e-10	-3.88862e-10	-3.81164e-10	-2.4738e-11	7.80847e-10	2.07265e-09	3.88901e-09	6.17934e-09	8.85067e-09
0.07152	-4.39024e-11	-2.6516e-11	-1.01166e-11	2.01926e-11	7.54381e-11	1.9899e-10	4.03496e-10	7.53273e-10	1.25325e-09	-2.43848e-10	-3.78141e-10	-3.76561e-10	-2.92951e-11	7.74847e-10	2.07117e-09	3.88898e-09	6.19161e-09	8.84623e-09
0.07177	-5.00755e-11	-2.80593e-11	-1.01166e-11	1.40195e-11	8.0068e-11	2.02077e-10	4.05039e-10	7.65619e-10	1.25788e-09	-2.4077e-10	-3.73602e-10	-3.71986e-10	-2.93315e-11	7.88572e-10	2.0834e-09	3.87384e-09	6.19628e-09	8.863e-09
0.07202	-4.23591e-11	-3.11459e-11	-8.57335e-12	1.71061e-11	8.16113e-11	2.00533e-10	4.01952e-10	7.62532e-10	1.26251e-09	-2.40743e-10	-3.90323e-10	-3.76543e-10	-3.09021e-11	7.94645e-10	2.08954e-09	3.89207e-09	6.20089e-09	8.86775e-09
0.07227	-5.00755e-11	-1.57131e-11	-1.16599e-11	1.40195e-11	7.85247e-11	1.97447e-10	4.08125e-10	7.68705e-10	1.25942e-09	-2.39291e-10	-3.8583e-10	-3.78086e-10	-3.85002e-11	7.76417e-10	2.08505e-09	3.89528e-09	6.20248e-09	8.88006e-09
0.07252	-3.46427e-11	-2.80593e-11	-8.57335e-12	2.32792e-11	7.23516e-11	1.9436e-10	4.03496e-10	7.71792e-10	1.25325e-09	-2.51428e-10	-3.82725e-10	-3.76579e-10	-3.23908e-11	7.82463e-10	2.09264e-09	3.90445e-09	6.20862e-09	8.89391e-09
0.07277	-4.08158e-11	-2.34295e-11	-2.09196e-11	2.63658e-11	7.38949e-11	2.02077e-10	4.01952e-10	7.73335e-10	1.26096e-09	-2.42386e-10	-3.78159e-10	-3.78068e-10	-2.31856e-11	7.91659e-10	2.09121e-09	3.90448e-09	6.21327e-09	8.90315e-09
0.07302	-4.39024e-11	-2.80593e-11	-1.47465e-11	2.01926e-11	7.69814e-11	2.00533e-10	4.11212e-10	7.65619e-10	1.25633e-09	-2.48414e-10	-3.82725e-10	-3.73502e-10	-2.00991e-11	7.93175e-10	2.10035e-09	3.89999e-09	6.21949e-09	8.90332e-09
0.07327	-3.77292e-11	-2.18862e-11	-3.9435e-12	1.55628e-11	8.16113e-11	1.92817e-10	4.08125e-10	7.73335e-10	1.25942e-09	-2.45346e-10	-3.85739e-10	-3.73447e-10	-2.32402e-11	7.82563e-10	2.10038e-09	3.91369e-09	6.23474e-09	8.92317e-09
0.073521	-4.39024e-11	-2.49728e-11	-1.16599e-11	1.71061e-11	7.23516e-11	1.95904e-10	4.06582e-10	7.59446e-10	1.27177e-09	-2.36195e-10	-3.75118e-10	-3.68881e-10	-4.1423e-11	7.91641e-10	2.0958e-09	3.91529e-09	6.22873e-09	8.92632e-09
0.073771	-5.00755e-11	-2.49728e-11	-1.32032e-11	1.86494e-11	7.69814e-11	2.02077e-10	4.12755e-10	7.70249e-10	1.26714e-09	-2.39191e-10	-3.81173e-10	-3.70379e-10	-1.87378e-11	7.90116e-10	2.09434e-09	3.91384e-09	6.22878e-09	8.92337e-09
0.074021	-4.69889e-11	-3.42325e-11	-1.32032e-11	2.17359e-11	7.08083e-11	2.00533e-10	3.97322e-10	7.47099e-10	1.25788e-09	-2.39245e-10	-3.84205e-10	-3.70424e-10	-3.2318e-11	7.80992e-10	2.10949e-09	3.92454e-09	6.24407e-09	8.93859e-09
0.074271	-4.54456e-11	-2.96026e-11	-7.03006e-12	1.24762e-11	7.23516e-11	2.0362e-10	4.03496e-10	7.77965e-10	1.26714e-09	-2.45355e-10	-3.75118e-10	-3.76488e-10	-3.08384e-11	7.87029e-10	2.09437e-09	3.9307e-09	6.25026e-09	8.93573e-09
0.074521	-4.54456e-11	-2.18862e-11	-1.16599e-11	2.17359e-11	8.0068e-11	1.95904e-10	4.05039e-10	7.73335e-10	1.27177e-09	-2.46853e-10	-3.82689e-10	-3.70452e-10	-2.47289e-11	7.85577e-10	2.10194e-09	3.92933e-09	6.25034e-09	8.95246e-09
0.074771	-4.39024e-11	-2.80593e-11	-1.47465e-11	1.86494e-11	7.85247e-11	2.05163e-10	4.12755e-10	7.71792e-10	1.27022e-09	-2.36159e-10	-3.82725e-10	-3.74972e-10	-2.47016e-11	7.91686e-10	2.10813e-09	3.94913e-09	6.25792e-09	8.94808e-09
0.075021	-4.54456e-11	-2.18862e-11	-1.47465e-11	2.01926e-11	7.85247e-11	2.02077e-10	4.05039e-10	7.67162e-10	1.2764e-09	-2.31538e-10	-3.81127e-10	-3.7195e-10	-2.62085e-11	7.94736e-10	2.11424e-09	3.94623e-09	6.2505e-09	8.96488e-09
0.075271	-4.39024e-11	-3.11459e-11	-1.47465e-11	1.71061e-11	8.0068e-11	2.11336e-10	4.11212e-10	7.74879e-10	1.27794e-09	-2.3457e-10	-3.68936e-10	-3.7194e-10	-2.31584e-11	7.88672e-10	2.11124e-09	3.95237e-09	6.27638e-09	8.97271e-09
0.075521	-5.16188e-11	-2.6516e-11	-3.9435e-12	2.01926e-11	7.85247e-11	2.02077e-10	4.17385e-10	7.73335e-10	1.28103e-09	-2.36068e-10	-3.71895e-10	-3.73466e-10	-2.16333e-11	7.91677e-10	2.11283e-09	3.96149e-09	6.27655e-09	8.99102e-09
0.075771	-4.39024e-11	-2.6516e-11	-1.32032e-11	1.86494e-11	7.23516e-11	2.05163e-10	4.15842e-10	7.76422e-10	1.27948e-09	-2.28497e-10	-3.6889e-10	-3.7352e-10	-2.47107e-11	7.90225e-10	2.1265e-09	3.95093e-09	6.27965e-09	8.98353e-09
0.076021	-4.39024e-11	-3.11459e-11	-1.93763e-11	7.84638e-12	7.85247e-11	2.00533e-10	4.14299e-10	7.82595e-10	1.27485e-09	-2.3605e-10	-3.73466e-10	-3.81091e-10	-3.0802e-11	7.99366e-10	2.11591e-09	3.96157e-09	6.28729e-09	8.98809e-09
0.076271	-4.39024e-11	-1.87996e-11	-8.57335e-12	1.09329e-11	7.38949e-11	2.02077e-10	4.08125e-10	7.91855e-10	1.29955e-09	-2.31538e-10	-3.76507e-10	-3.71913e-10	-2.62631e-11	7.99412e-10	2.1159e-09	3.96619e-09	6.28746e-09	8.99425e-09
0.076521	-4.39024e-11	-1.87996e-11	-1.93763e-11	1.24762e-11	7.85247e-11	2.0825e-10	4.11212e-10	7.84138e-10	1.2872e-09	-2.34543e-10	-3.70406e-10	-3.59749e-10	-2.6254e-11	7.9785e-10	2.12504e-09	3.96316e-09	6.30729e-09	8.99891e-09
0.076771	-4.69889e-11	-2.6516e-11	-5.48678e-12	2.01926e-11	7.85247e-11	2.05163e-10	4.17385e-10	7.87225e-10	1.28103e-09	-2.31474e-10	-3.67311e-10	-3.74945e-10	-2.92951e-11	7.91786e-10	2.12359e-09	3.96178e-09	6.30891e-09	9.00816e-09
0.077022	-3.61859e-11	-2.49728e-11	-2.09196e-11	2.01926e-11	7.38949e-11	2.09793e-10	4.14299e-10	7.79508e-10	1.30418e-09	-2.25374e-10	-3.65785e-10	-3.78077e-10	-2.78064e-11	7.99339e-10	2.12659e-09	3.98911e-09	6.30443e-09	9.02047e-09
0.077272	-4.39024e-11	-2.49728e-11	-1.47465e-11	1.40195e-11	8.16113e-11	2.09793e-10	4.20472e-10	7.81052e-10	1.29955e-09	-2.28388e-10	-3.68808e-10	-3.76616e-10	-3.08293e-11	7.93293e-10	2.12054e-09	3.96952e-09	6.31971e-09	9.02968e-09
0.077522	-4.39024e-11	-2.49728e-11	-1.7833e-11	1.71061e-11	7.38949e-11	2.06707e-10	4.14299e-10	7.88768e-10	1.30418e-09	-2.28388e-10	-3.65795e-10	-3.84168e-10	-2.78064e-11	7.94782e-10	2.12658e-09	3.98159e-09	6.32897e-09	9.02678e-09
0.077772	-4.39024e-11	-2.6516e-11	-1.32032e-11	1.86494e-11	7.23516e-11	2.06707e-10	4.17385e-10	7.85682e-10	1.30726e-09	-2.25429e-10	-3.6879e-10	-3.73566e-10	-2.93679e-11	7.94818e-10	2.12206e-09	3.98022e-09	6.33202e-09	9.04353e-09
0.078022	-4.54456e-11	-3.57757e-11	-1.32032e-11	1.71061e-11	7.85247e-11	2.0362e-10	4.20472e-10	7.87225e-10	1.30418e-09	-2.40598e-10	-3.62753e-10	-3.78041e-10	-3.84547e-11	7.99421e-10	2.12525e-09	3.99389e-09	6.32297e-09	9.04222e-09
0.078272	-3.77292e-11	-2.18862e-11	-1.16599e-11	1.09329e-11	7.69814e-11	1.9899e-10	4.12755e-10	7.87225e-10	1.30109e-09	-2.30049e-10	-3.70352e-10	-3.7195e-10	-2.62904e-11	8.03978e-10	2.1525e-09	3.98637e-09	6.33675e-09	9.0605e-09
0.078522	-4.08158e-11	-2.80593e-11	-1.01166e-11	1.71061e-11	7.69814e-11	2.0362e-10	4.14299e-10	7.90311e-10	1.31652e-09	-2.36068e-10	-3.7184e-10	-3.68908e-10	-2.32402e-11	7.96434e-10	2.11615e-09	3.9909e-09	6.35509e-09	9.05911e-09
0.078772	-4.69889e-11	-2.49728e-11	-7.03006e-12	1.86494e-11	7.85247e-11	2.0362e-10	4.17385e-10	7.93398e-10	1.31807e-09	-2.33045e-10	-3.58133e-10	-3.76488e-10	-3.53499e-11	8.05521e-10	2.13124e-09	3.99097e-09	6.34764e-09	9.0638e-09
0.079022	-4.23591e-11	-3.11459e-11	-1.16599e-11	1.55628e-11	8.0068e-11	2.05163e-10	4.26645e-10	7.82595e-10	1.31498e-09	-2.31493e-10	-3.59612e-10	-3.71995e-10	-2.32493e-11	8.02507e-10	2.14042e-09	3.99708e-09	6.35986e-09	9.08371e-09
0.079272	-4.54456e-11	-2.6516e-11	-8.57335e-12	2.48225e-11	8.62411e-11	2.0362e-10	4.20472e-10	7.90311e-10	1.30881e-09	-2.29977e-10	-3.65713e-10	-3.78041e-10	-2.77336e-11	7.99485e-10	2.13131e-09	3.99869e-09	6.37063e-09	9.09452e-09
0.079522	-5.00755e-11	-1.87996e-11	-8.57335e-12	1.55628e-11	7.08083e-11	2.0362e-10	4.15842e-10	7.82595e-10	1.30418e-09	-2.3299e-10	-3.64206e-10	-3.73493e-10	-2.47653e-11	8.07083e-10	2.12824e-09	4.00784e-09	6.37372e-09	9.0977e-09
0.079772	-4.54456e-11	-3.11459e-11	-5.48678e-12	1.86494e-11	8.16113e-11	2.02077e-10	4.12755e-10	7.94941e-10	1.31035e-09	-2.28406e-10	-3.61165e-10	-3.7195e-10	-3.38976e-11	8.05585e-10	2.13438e-09	4.00646e-09	6.36922e-09	9.10838e-09
0.080022	-3.92725e-11	-3.26892e-11	-8.57335e-12	1.40195e-11	7.69814e-11	2.0825e-10	4.14299e-10	7.96485e-10	1.31807e-09	-2.2384e-10	-3.6416e-10	-3.7342e-10	-3.39158e-11	8.02571e-10	2.14351e-09	4.02018e-09	6.37989e-09	9.10543e-09
0.080272	-5.31621e-11	-2.80593e-11	-7.03006e-12	1.86494e-11	8.0068e-11	2.0825e-10	4.23558e-10	7.90311e-10	1.30881e-09	-2.2994e-10	-3.58087e-10	-3.65831e-10	-2.78064e-11	8.10133e-10	2.13447e-09	4.02178e-09	6.38301e-09	9.11159e-09
0.080522	-4.39024e-11	-2.49728e-11	-1.62898e-11	2.01926e-11	8.46978e-11	2.0362e-10	4.22015e-10	7.85682e-10	1.31344e-09	-2.34525e-10	-3.59594e-10	-3.70333e-10	-2.62358e-11	8.02562e-10	2.14358e-09	4.02031e-09	6.38458e-09	9.12541e-09
0.080773	-4.69889e-11	-3.26892e-11	-1.16599e-11	6.30309e-12	8.46978e-11	2.06707e-10	4.22015e-10	8.04201e-10	1.31807e-09	-2.29904e-10	-3.62635e-10	-3.65822e-10	-2.47744e-11	8.04078e-10	2.14522e-09	4.02792e-09	6.38917e-09	9.13473e-09
0.081023	-4.85322e-11	-2.18862e-11	-3.9435e-12	1.86494e-11	8.31545e-11	2.0362e-10	4.22015e-10	7.94941e-10	1.32578e-09	-2.17776e-10	-3.5964e-10	-3.71886e-10	-3.69387e-11	8.10115e-10	2.15585e-09	4.02637e-09	6.38928e-09	9.15003e-09
0.081273	-5.00755e-11	-3.42325e-11	-8.57335e-12	1.24762e-11	8.0068e-11	2.0362e-10	4.11212e-10	8.05744e-10	1.32733e-09	-2.34461e-10	-3.65685e-10	-3.70397e-10	-3.24544e-11	7.98014e-10	2.1468e-09	4.01581e-09	6.40297e-09	9.14861e-09
0.081523	-4.69889e-11	-2.80593e-11	-1.62898e-11	1.86494e-11	7.54381e-11	2.09793e-10	4.23558e-10	7.99571e-10	1.32578e-09	-2.31547e-10	-3.59667e-10	-3.70352e-10	-3.54318e-11	8.08626e-10	2.15287e-09	4.03556e-09	6.397e-09	9.1517e-09
0.081773	-4.08158e-11	-3.11459e-11	-1.47465e-11	1.55628e-11	7.85247e-11	1.97447e-10	4.25102e-10	8.01114e-10	1.32733e-09	-2.37602e-10	-3.67201e-10	-3.64324e-10	-2.78701e-11	8.10206e-10	2.15747e-09	4.03419e-09	6.40618e-09	9.15937e-09
0.082023	-5.00755e-11	-3.11459e-11	-1.01166e-11	2.32792e-11	7.54381e-11	2.06707e-10	4.26645e-10	7.91855e-10	1.3335e-09	-2.33009e-10	-3.58078e-10	-3.76461e-10	-3.53499e-11	8.08708e-10	2.15601e-09	4.04029e-09	6.41695e-09	9.16406e-09
0.082273	-4.54456e-11	-2.6516e-11	-1.93763e-11	2.01926e-11	7.85247e-11	1.92817e-10	4.20472e-10	8.04201e-10	1.32424e-09	-2.23913e-10	-3.55119e-10	-3.71931e-10	-1.86832e-11	8.11767e-10	2.16208e-09	4.04195e-09	6.42313e-09	9.17633e-09
0.082523	-4.69889e-11	-2.34295e-11	-1.32032e-11	1.71061e-11	8.16113e-11	2.02077e-10	4.28188e-10	8.05744e-10	1.32578e-09	-2.37547e-10	-3.79393e-10	-3.6732e-10	-2.92314e-11	8.14826e-10	2.15759e-09	4.05868e-09	6.42627e-09	9.18256e-09
0.082773	-4.54456e-11	-2.18862e-11	6.86356e-13	1.40195e-11	7.69814e-11	2.02077e-10	4.26645e-10	7.98028e-10	1.31961e-09	-2.31529e-10	-3.61219e-10	-3.65767e-10	-2.47653e-11	8.13283e-10	2.16666e-09	4.04969e-09	6.4354e-09	9.19324e-09
0.083023	-3.15561e-11	-3.26892e-11	-1.16599e-11	1.86494e-11	8.16113e-11	2.0825e-10	4.31275e-10	7.91855e-10	1.33041e-09	-2.31456e-10	-3.58096e-10	-3.65795e-10	-3.2318e-11	8.07219e-10	2.15763e-09	4.05878e-09	6.42945e-09	9.18732e-09
0.083273	-3.77292e-11	-2.34295e-11	-8.57335e-12	2.48225e-11	7.69814e-11	2.02077e-10	4.23558e-10	7.99571e-10	1.32424e-09	-2.25383e-10	-3.64151e-10	-3.71868e-10	-2.47016e-11	8.14808e-10	2.16827e-09	4.05888e-09	6.44466e-09	9.20709e-09
0.083523	-4.23591e-11	-2.80593e-11	-7.03006e-12	1.86494e-11	8.46978e-11	1.9436e-10	4.15842e-10	7.99571e-10	1.33504e-09	-2.29913e-10	-3.59603e-10	-3.67347e-10	-1.86559e-11	8.14817e-10	2.17132e-09	4.06647e-09	6.4448e-09	9.20422e-09
0.083773	-3.61859e-11	-2.96026e-11	-3.9435e-12	1.86494e-11	8.46978e-11	2.0362e-10	4.31275e-10	8.02658e-10	1.3227e-09	-2.28415e-10	-3.58024e-10	-3.7037e-10	-3.53863e-11	8.08744e-10	2.16073e-09	4.0605e-09	6.45251e-09	9.21486e-09
0.084023	-3.61859e-11	-1.87996e-11	-1.62898e-11	1.71061e-11	7.38949e-11	2.02077e-10	4.28188e-10	8.07288e-10	1.33967e-09	-2.2837e-10	-3.53457e-10	-3.70352e-10	-3.39158e-11	8.13292e-10	2.17287e-09	4.07422e-09	6.46778e-09	9.21192e-09
0.084274	-4.85322e-11	-2.96026e-11	-1.47465e-11	2.48225e-11	8.0068e-11	2.00533e-10	4.32818e-10	8.07288e-10	1.34121e-09	-2.22315e-10	-3.56471e-10	-3.64279e-10	-2.62722e-11	8.14854e-10	2.17297e-09	4.08038e-09	6.46332e-09	9.21956e-09
0.084524	-3.92725e-11	-2.34295e-11	-1.32032e-11	2.01926e-11	7.23516e-11	2.09793e-10	4.31275e-10	7.96485e-10	1.34584e-09	-2.2984e-10	-3.54919e-10	-3.68772e-10	-2.47653e-11	8.16351e-10	2.17752e-09	4.07589e-09	6.46628e-09	9.22419e-09
0.084774	-5.31621e-11	-2.49728e-11	-8.5693e-13	1.55628e-11	7.85247e-11	2.02077e-10	4.28188e-10	8.08831e-10	1.34121e-09	-2.19265e-10	-3.47293e-10	-3.61247e-10	-3.54136e-11	8.10333e-10	2.17298e-09	4.08498e-09	6.45574e-09	9.22575e-09
0.085024	-5.47053e-11	-3.11459e-11	-1.62898e-11	1.86494e-11	7.69814e-11	2.0362e-10	4.25102e-10	7.93398e-10	1.3335e-09	-2.28297e-10	-3.48773e-10	-3.73329e-10	-3.23999e-11	8.22443e-10	2.17451e-09	4.07898e-09	6.47552e-09	9.22735e-09
0.085274	-3.46427e-11	-3.11459e-11	-1.16599e-11	2.01926e-11	8.0068e-11	2.09793e-10	4.31275e-10	8.04201e-10	1.34584e-09	-2.19237e-10	-3.48773e-10	-3.61265e-10	-2.78246e-11	8.1332e-10	2.1806e-09	4.08657e-09	6.47866e-09	9.23806e-09
0.085524	-4.39024e-11	-2.49728e-11	-1.62898e-11	1.55628e-11	8.16113e-11	2.06707e-10	4.25102e-10	8.07288e-10	1.34739e-09	-2.25219e-10	-3.47248e-10	-3.71831e-10	-3.08293e-11	8.05685e-10	2.17612e-09	4.08664e-09	6.47412e-09	9.24279e-09
0.085774	-4.39024e-11	-2.80593e-11	-2.24629e-11	1.40195e-11	8.46978e-11	2.0825e-10	4.35904e-10	8.25807e-10	1.34893e-09	-2.14616e-10	-3.47239e-10	-3.6584e-10	-2.78246e-11	8.13274e-10	2.18671e-09	4.09121e-09	6.47721e-09	9.25809e-09
0.086024	-3.77292e-11	-2.34295e-11	-7.03006e-12	1.40195e-11	7.85247e-11	2.0825e-10	4.26645e-10	8.13461e-10	1.3443e-09	-2.20671e-10	-3.47284e-10	-3.73365e-10	-3.23726e-11	8.14845e-10	2.17613e-09	4.08979e-09	6.48794e-09	9.26282e-09
0.086274	-4.39024e-11	-2.80593e-11	-1.16599e-11	1.55628e-11	7.69814e-11	2.0825e-10	4.29731e-10	8.11917e-10	1.35973e-09	-2.23731e-10	-3.54873e-10	-3.62753e-10	-3.0802e-11	8.14854e-10	2.18218e-09	4.10345e-09	6.49414e-09	9.27352e-09
0.086524	-5.00755e-11	-2.96026e-11	-8.57335e-12	1.24762e-11	8.31545e-11	2.09793e-10	4.25102e-10	8.08831e-10	1.34739e-09	-2.19174e-10	-3.48846e-10	-3.65776e-10	-1.86468e-11	8.14899e-10	2.18376e-09	4.0929e-09	6.50033e-09	9.27207e-09
0.086774	-4.23591e-11	-2.6516e-11	-1.01166e-11	1.86494e-11	7.23516e-11	1.95904e-10	4.28188e-10	8.21177e-10	1.35047e-09	-2.19146e-10	-3.53339e-10	-3.71868e-10	-2.77427e-11	8.22506e-10	2.1868e-09	4.10045e-09	6.50946e-09	9.27515e-09
0.087024	-4.85322e-11	-2.49728e-11	-1.32032e-11	1.24762e-11	7.85247e-11	2.06707e-10	4.31275e-10	8.25807e-10	1.34893e-09	-2.19137e-10	-3.45777e-10	-3.6732e-10	-3.08111e-11	8.19474e-10	2.18377e-09	4.09904e-09	6.50046e-09	9.28135e-09
0.087274	-4.08158e-11	-2.49728e-11	-1.62898e-11	1.86494e-11	8.62411e-11	2.11336e-10	4.31275e-10	8.02658e-10	1.34276e-09	-2.1763e-10	-3.51796e-10	-3.65758e-10	-2.47198e-11	8.14908e-10	2.18534e-09	4.11121e-09	6.51715e-09	9.29513e-09
0.087524	-5.00755e-11	-2.34295e-11	-1.7833e-11	1.40195e-11	7.69814e-11	2.06707e-10	4.32818e-10	8.18091e-10	1.35202e-09	-2.20644e-10	-3.45723e-10	-3.64206e-10	-2.31765e-11	8.19402e-10	2.19445e-09	4.10672e-09	6.51121e-09	9.29827e-09
0.087775	-5.31621e-11	-2.80593e-11	-8.57335e-12	1.55628e-11	8.0068e-11	2.11336e-10	4.20472e-10	8.25807e-10	1.35356e-09	-2.16142e-10	-3.44143e-10	-3.61165e-10	-2.62449e-11	8.10342e-10	2.18692e-09	4.10978e-09	6.52187e-09	9.29976e-09
0.088025	-4.08158e-11	-2.49728e-11	-1.01166e-11	2.17359e-11	8.0068e-11	2.05163e-10	4.32818e-10	8.19634e-10	1.37517e-09	-2.2521e-10	-3.41066e-10	-3.64142e-10	-3.08202e-11	8.20981e-10	2.19455e-09	4.11594e-09	6.52502e-09	9.29081e-09
0.088275	-4.39024e-11	-2.49728e-11	-1.01166e-11	1.09329e-11	8.46978e-11	2.05163e-10	4.32818e-10	8.25807e-10	1.36899e-09	-2.16114e-10	-3.38015e-10	-3.55028e-10	-2.77791e-11	8.24068e-10	2.2022e-09	4.12204e-09	6.53116e-09	9.32275e-09
0.088525	-5.00755e-11	-2.34295e-11	6.86356e-13	1.55628e-11	7.54381e-11	2.05163e-10	4.45164e-10	8.15004e-10	1.35819e-09	-2.16069e-10	-3.41057e-10	-3.58078e-10	-2.47562e-11	8.19502e-10	2.19919e-09	4.11607e-09	6.53422e-09	9.31689e-09
0.088775	-3.30994e-11	-2.49728e-11	-1.01166e-11	1.24762e-11	8.62411e-11	2.0362e-10	4.38991e-10	8.21177e-10	1.36591e-09	-2.17612e-10	-3.42618e-10	-3.67201e-10	-3.23726e-11	8.17949e-10	2.19766e-09	4.13279e-09	6.52973e-09	9.32604e-09
0.089025	-5.47053e-11	-2.96026e-11	6.86356e-13	2.17359e-11	8.31545e-11	2.0825e-10	4.32818e-10	8.18091e-10	1.36591e-09	-2.20644e-10	-3.4575e-10	-3.5964e-10	-3.39249e-11	8.17968e-10	2.20073e-09	4.12986e-09	6.54194e-09	9.33224e-09
0.089275	-5.00755e-11	-2.96026e-11	-8.5693e-13	1.09329e-11	7.85247e-11	2.05163e-10	4.29731e-10	8.07288e-10	1.36128e-09	-2.1606e-10	-3.57896e-10	-3.61119e-10	-3.08839e-11	8.22543e-10	2.20532e-09	4.13289e-09	6.54807e-09	9.33991e-09
0.089525	-5.47053e-11	-3.57757e-11	-3.9435e-12	1.86494e-11	7.85247e-11	2.05163e-10	4.34361e-10	8.15004e-10	1.36282e-09	-2.11475e-10	-3.45768e-10	-3.61137e-10	-3.08657e-11	8.22579e-10	2.20384e-09	4.13293e-09	6.54058e-09	9.34005e-09
0.089775	-4.69889e-11	-2.96026e-11	-1.62898e-11	7.84638e-12	8.0068e-11	2.20596e-10	4.38991e-10	8.19634e-10	1.36436e-09	-2.14444e-10	-3.45696e-10	-3.62644e-10	-3.08657e-11	8.24104e-10	2.20692e-09	4.13606e-09	6.55737e-09	9.35683e-09
0.090025	-4.23591e-11	-2.80593e-11	-1.01166e-11	1.40195e-11	7.85247e-11	2.11336e-10	4.37448e-10	8.19634e-10	1.36128e-09	-2.05329e-10	-3.45641e-10	-3.59631e-10	-3.08202e-11	8.24132e-10	2.21456e-09	4.14986e-09	6.56658e-09	9.35692e-09
0.090275	-4.39024e-11	-2.49728e-11	-1.01166e-11	1.86494e-11	8.77844e-11	2.11336e-10	4.42078e-10	8.24264e-10	1.37208e-09	-2.08334e-10	-3.36536e-10	-3.64197e-10	-2.32038e-11	8.27191e-10	2.21311e-09	4.15888e-09	6.56051e-09	9.35547e-09
0.090525	-3.46427e-11	-1.72563e-11	-1.16599e-11	1.71061e-11	7.38949e-11	2.09793e-10	4.38991e-10	8.18091e-10	1.36282e-09	-2.09859e-10	-3.44079e-10	-3.6574e-10	-2.46743e-11	8.28689e-10	2.21763e-09	4.12248e-09	6.55595e-09	9.36765e-09
0.090775	-4.08158e-11	-2.49728e-11	-8.57335e-12	1.40195e-11	7.38949e-11	2.05163e-10	4.49794e-10	8.25807e-10	1.37362e-09	-2.06836e-10	-3.39595e-10	-3.64197e-10	-2.31402e-11	8.21109e-10	2.21162e-09	4.14818e-09	6.56526e-09	9.36618e-09
0.091025	-4.39024e-11	-2.96026e-11	-1.62898e-11	1.24762e-11	8.0068e-11	2.09793e-10	4.26645e-10	8.21177e-10	1.37825e-09	-2.09896e-10	-3.47157e-10	-3.59631e-10	-2.01992e-11	8.27164e-10	2.22067e-09	4.14691e-09	6.59558e-09	9.36326e-09
0.091275	-4.39024e-11	-3.7319e-11	-1.62898e-11	1.71061e-11	8.31545e-11	2.09793e-10	4.31275e-10	8.28894e-10	1.37671e-09	-2.14416e-10	-3.4112e-10	-3.62617e-10	-3.99343e-11	8.272e-10	2.21022e-09	4.16362e-09	6.55628e-09	9.38763e-09
0.091526	-4.08158e-11	-1.41698e-11	-8.57335e-12	1.71061e-11	6.9265e-11	2.0825e-10	4.34361e-10	8.13461e-10	1.38751e-09	-2.02316e-10	-3.44079e-10	-3.56553e-10	-2.78974e-11	8.27191e-10	2.23897e-09	4.15457e-09	6.58504e-09	9.38474e-09
0.091776	-4.39024e-11	-2.96026e-11	-1.47465e-11	2.01926e-11	8.0068e-11	2.11336e-10	4.38991e-10	8.30437e-10	1.3798e-09	-2.14389e-10	-3.34984e-10	-3.59576e-10	-3.54318e-11	8.25675e-10	2.21177e-09	4.15452e-09	6.5883e-09	9.38779e-09
0.092026	-5.00755e-11	-2.18862e-11	-8.57335e-12	1.09329e-11	8.0068e-11	2.0362e-10	4.29731e-10	8.3661e-10	1.38906e-09	-2.05302e-10	-3.40993e-10	-3.61101e-10	-3.24363e-11	8.27173e-10	2.22537e-09	4.15453e-09	6.59444e-09	9.39093e-09
0.092276	-3.77292e-11	-2.6516e-11	-1.01166e-11	1.55628e-11	7.85247e-11	2.14423e-10	4.35904e-10	8.35067e-10	1.38288e-09	-2.03732e-10	-3.34929e-10	-3.58078e-10	-3.38703e-11	8.24159e-10	2.23154e-09	4.15606e-09	6.59903e-09	9.40169e-09
0.092526	-5.00755e-11	-3.11459e-11	-1.32032e-11	1.71061e-11	7.85247e-11	2.0825e-10	4.40534e-10	8.3661e-10	1.3798e-09	-2.05284e-10	-3.34911e-10	-3.61119e-10	-2.17152e-11	8.28698e-10	2.23006e-09	4.15759e-09	6.5946e-09	9.41394e-09
0.092776	-3.61859e-11	-2.80593e-11	-1.47465e-11	2.01926e-11	7.85247e-11	2.1751e-10	4.26645e-10	8.39696e-10	1.38288e-09	-2.11366e-10	-3.3797e-10	-3.62644e-10	-2.77609e-11	8.25729e-10	2.23157e-09	4.15611e-09	6.61438e-09	9.41102e-09
0.093026	-6.24218e-11	-2.49728e-11	-3.9435e-12	1.71061e-11	8.16113e-11	2.09793e-10	4.38991e-10	8.33523e-10	1.38443e-09	-2.06791e-10	-3.39513e-10	-3.59612e-10	-3.08293e-11	8.34844e-10	2.23003e-09	4.16219e-09	6.61142e-09	9.42175e-09
0.093276	-4.08158e-11	-3.11459e-11	-2.09196e-11	2.63658e-11	7.85247e-11	2.14423e-10	4.29731e-10	8.24264e-10	1.39369e-09	-2.00718e-10	-3.39504e-10	-3.61128e-10	-2.78155e-11	8.31857e-10	2.22549e-09	4.16078e-09	6.60692e-09	9.43249e-09
0.093526	-5.00755e-11	-2.6516e-11	-1.32032e-11	2.01926e-11	8.0068e-11	2.1288e-10	4.35904e-10	8.4124e-10	1.38288e-09	-2.09832e-10	-3.36427e-10	-3.62626e-10	-3.08657e-11	8.334e-10	2.23311e-09	4.17449e-09	6.6236e-09	9.43266e-09
0.093776	-4.08158e-11	-2.18862e-11	-1.47465e-11	9.38966e-12	7.85247e-11	2.06707e-10	4.31275e-10	8.2735e-10	1.38134e-09	-2.09941e-10	-3.31915e-10	-3.56571e-10	-3.39249e-11	8.39464e-10	2.23772e-09	4.17304e-09	6.61158e-09	9.45099e-09
0.094026	-4.69889e-11	-4.04056e-11	-1.01166e-11	1.55628e-11	7.08083e-11	2.1288e-10	4.38991e-10	8.2735e-10	1.3798e-09	-2.19046e-10	-3.45568e-10	-3.62617e-10	-3.24453e-11	8.31994e-10	2.23466e-09	4.17153e-09	6.62529e-09	9.45572e-09
0.094276	-3.92725e-11	-2.18862e-11	-1.32032e-11	2.79091e-11	7.85247e-11	2.1751e-10	4.35904e-10	8.39696e-10	1.38288e-09	-2.11457e-10	-3.37979e-10	-3.59603e-10	-3.6966e-11	8.51601e-10	2.22864e-09	4.17617e-09	6.63457e-09	9.46331e-09
0.094526	-4.23591e-11	-2.96026e-11	-1.16599e-11	1.55628e-11	8.31545e-11	2.0825e-10	4.38991e-10	8.39696e-10	1.39523e-09	-2.08371e-10	-3.30372e-10	-3.5954e-10	-2.93952e-11	8.22807e-10	2.24532e-09	4.18833e-09	6.6423e-09	9.45425e-09
0.094776	-4.08158e-11	-2.18862e-11	-1.16599e-11	2.79091e-11	7.69814e-11	2.1751e-10	4.42078e-10	8.33523e-10	1.38751e-09	-2.09887e-10	-3.40947e-10	-3.51987e-10	-3.39067e-11	8.333e-10	2.23625e-09	4.17627e-09	6.65153e-09	9.4604e-09
0.095027	-3.30994e-11	-3.11459e-11	-1.01166e-11	2.17359e-11	8.46978e-11	2.1288e-10	4.31275e-10	8.30437e-10	1.39986e-09	-2.11393e-10	-3.31888e-10	-3.64115e-10	-3.08748e-11	8.31857e-10	2.23166e-09	4.18849e-09	6.65763e-09	9.47874e-09
0.095277	-4.08158e-11	-2.80593e-11	-1.7833e-11	1.86494e-11	8.0068e-11	2.1751e-10	4.42078e-10	8.3198e-10	1.39523e-09	-2.06836e-10	-3.36263e-10	-3.59585e-10	-2.92951e-11	8.34925e-10	2.23929e-09	4.20382e-09	6.647e-09	9.47882e-09
0.095527	-4.39024e-11	-3.26892e-11	-1.47465e-11	1.86494e-11	8.16113e-11	2.1288e-10	4.49794e-10	8.48956e-10	1.38906e-09	-2.08343e-10	-3.12098e-10	-3.54964e-10	-2.32311e-11	8.39446e-10	2.24389e-09	4.20547e-09	6.65002e-09	9.47431e-09
0.095777	-4.85322e-11	-2.18862e-11	-1.32032e-11	1.71061e-11	7.69814e-11	2.0825e-10	4.40534e-10	8.3661e-10	1.39986e-09	-2.09832e-10	-3.46911e-10	-3.51905e-10	-3.07838e-11	8.27291e-10	2.24088e-09	4.21158e-09	6.65467e-09	9.48497e-09
0.096027	-5.16188e-11	-3.11459e-11	-7.03006e-12	2.01926e-11	8.46978e-11	2.0825e-10	4.46707e-10	8.3661e-10	1.3906e-09	-2.02252e-10	-3.27331e-10	-3.54928e-10	-2.47471e-11	8.30314e-10	2.24242e-09	4.21004e-09	6.66382e-09	9.48659e-09
0.096277	-3.77292e-11	-2.18862e-11	-8.57335e-12	1.24762e-11	8.16113e-11	2.23683e-10	4.46707e-10	8.44326e-10	1.3906e-09	-2.08343e-10	-3.33249e-10	-3.53403e-10	-2.77245e-11	8.37903e-10	2.24849e-09	4.20243e-09	6.65933e-09	9.49276e-09
0.096527	-3.77292e-11	-2.6516e-11	-8.57335e-12	1.71061e-11	7.69814e-11	2.09793e-10	4.43621e-10	8.3198e-10	1.38906e-09	-2.14425e-10	-3.22683e-10	-3.50389e-10	-2.16333e-11	8.28816e-10	2.24245e-09	4.207e-09	6.66544e-09	9.50348e-09
0.096777	-4.23591e-11	-2.6516e-11	-8.57335e-12	1.71061e-11	6.9265e-11	2.1751e-10	4.43621e-10	8.48956e-10	1.38751e-09	-2.05311e-10	-3.34765e-10	-3.57987e-10	-2.02356e-11	8.31848e-10	2.24703e-09	4.21312e-09	6.67161e-09	9.50354e-09
0.097027	-3.61859e-11	-2.96026e-11	-1.47465e-11	1.71061e-11	7.69814e-11	2.11336e-10	4.46707e-10	8.42783e-10	1.38443e-09	-2.05257e-10	-3.25724e-10	-3.56526e-10	-4.7587e-11	8.37976e-10	2.25318e-09	4.21163e-09	6.67627e-09	9.50359e-09
0.097277	-4.54456e-11	-2.6516e-11	-5.48678e-12	1.55628e-11	8.16113e-11	2.15966e-10	4.45164e-10	8.44326e-10	1.4014e-09	-2.05293e-10	-3.31751e-10	-3.59521e-10	-3.24635e-11	8.39555e-10	2.25628e-09	4.21163e-09	6.68543e-09	9.51127e-09
0.097527	-4.39024e-11	-2.80593e-11	-1.47465e-11	2.01926e-11	8.46978e-11	2.09793e-10	4.42078e-10	8.505e-10	1.39523e-09	-2.11339e-10	-3.28765e-10	-3.51869e-10	-2.63268e-11	8.42524e-10	2.25927e-09	4.21322e-09	6.68242e-09	9.52201e-09
0.097777	-5.16188e-11	-2.96026e-11	-5.48678e-12	2.63658e-11	7.69814e-11	2.14423e-10	4.45164e-10	8.44326e-10	1.39214e-09	-2.02243e-10	-3.33313e-10	-3.44261e-10	-3.53863e-11	8.27336e-10	2.24564e-09	4.22383e-09	6.67941e-09	9.52519e-09
0.098027	-4.23591e-11	-2.6516e-11	-1.16599e-11	2.01926e-11	8.31545e-11	2.14423e-10	4.42078e-10	8.55129e-10	1.40449e-09	-2.05257e-10	-3.31833e-10	-3.54846e-10	-2.62995e-11	8.34889e-10	2.25929e-09	4.21178e-09	6.6901e-09	9.53588e-09
0.098277	-4.39024e-11	-2.96026e-11	-2.40021e-12	1.71061e-11	8.46978e-11	2.15966e-10	4.49794e-10	8.61302e-10	1.39214e-09	-2.08307e-10	-3.34874e-10	-3.4733e-10	-2.77427e-11	8.37976e-10	2.26091e-09	4.22543e-09	6.69472e-09	9.53448e-09
0.098528	-4.39024e-11	-2.34295e-11	-2.09196e-11	1.40195e-11	8.0068e-11	2.14423e-10	4.37448e-10	8.59759e-10	1.39214e-09	-2.05248e-10	-3.3482e-10	-3.54855e-10	-2.31765e-11	8.36441e-10	2.26247e-09	4.22556e-09	6.69179e-09	9.54514e-09
0.098778	-5.00755e-11	-2.49728e-11	-1.32032e-11	1.71061e-11	7.54381e-11	2.06707e-10	4.48251e-10	8.53586e-10	1.4014e-09	-2.00681e-10	-3.22628e-10	-3.45777e-10	-2.31675e-11	8.3193e-10	2.26704e-09	4.23469e-09	6.70695e-09	9.54524e-09
0.099028	-4.23591e-11	-2.80593e-11	-1.16599e-11	1.86494e-11	8.62411e-11	2.20596e-10	4.5751e-10	8.52043e-10	1.39214e-09	-2.05202e-10	-3.24135e-10	-3.50316e-10	-2.61994e-11	8.44085e-10	2.26397e-09	4.23018e-09	6.6949e-09	9.5499e-09
0.099278	-4.08158e-11	-3.26892e-11	-1.32032e-11	1.09329e-11	8.16113e-11	2.19053e-10	4.43621e-10	8.59759e-10	1.4014e-09	-2.007e-10	-3.3324e-10	-3.53376e-10	-2.32129e-11	8.41117e-10	2.25636e-09	4.23172e-09	6.70556e-09	9.56523e-09
0.099528	-3.77292e-11	-3.7319e-11	-5.48678e-12	1.55628e-11	8.31545e-11	2.1751e-10	4.48251e-10	8.56673e-10	1.39677e-09	-2.08298e-10	-3.24181e-10	-3.5038e-10	-3.08202e-11	8.42669e-10	2.26244e-09	4.23935e-09	6.71473e-09	9.57445e-09
0.099778	-4.23591e-11	-2.34295e-11	-1.47465e-11	2.17359e-11	8.93277e-11	2.05163e-10	4.37448e-10	8.58216e-10	1.40758e-09	-2.08298e-10	-3.30226e-10	-3.56453e-10	-3.08839e-11	8.50249e-10	2.26699e-09	4.23945e-09	6.70726e-09	9.56999e-09
0.100028	-5.00755e-11	-2.96026e-11	-7.03006e-12	1.40195e-11	7.23516e-11	2.09793e-10	4.48251e-10	8.56673e-10	1.42301e-09	-2.00672e-10	-3.30254e-10	-3.54946e-10	-3.39249e-11	8.41117e-10	2.25637e-09	4.24703e-09	6.72551e-09	9.58064e-09
0.100278	-4.08158e-11	-3.11459e-11	2.22964e-12	2.17359e-11	8.31545e-11	2.1751e-10	4.45164e-10	8.61302e-10	1.40758e-09	-2.00709e-10	-3.28719e-10	-3.51896e-10	-3.23817e-11	8.36532e-10	2.26095e-09	4.24098e-09	6.72403e-09	9.58071e-09
0.100528	-4.85322e-11	-2.80593e-11	-2.40021e-12	2.17359e-11	8.16113e-11	2.09793e-10	4.38991e-10	8.48956e-10	1.42301e-09	-2.14398e-10	-3.27176e-10	-3.53366e-10	-2.63086e-11	8.44131e-10	2.27162e-09	4.24098e-09	6.71343e-09	9.58223e-09
0.100778	-3.61859e-11	-2.18862e-11	-1.32032e-11	2.01926e-11	8.31545e-11	2.06707e-10	4.52881e-10	8.52043e-10	1.41375e-09	-2.08389e-10	-3.25651e-10	-3.47302e-10	-3.23453e-11	8.44203e-10	2.26711e-09	4.24704e-09	6.72712e-09	9.58086e-09
0.101028	-3.92725e-11	-2.6516e-11	-2.40021e-12	1.55628e-11	7.69814e-11	2.15966e-10	4.42078e-10	8.53586e-10	1.41684e-09	-2.09868e-10	-3.27185e-10	-3.5185e-10	-2.78337e-11	8.48788e-10	2.26707e-09	4.24102e-09	6.7318e-09	9.60512e-09
0.101278	-4.39024e-11	-3.11459e-11	-1.16599e-11	7.84638e-12	8.31545e-11	2.1288e-10	4.48251e-10	8.73649e-10	1.41992e-09	-2.08343e-10	-3.30208e-10	-3.53385e-10	-3.23544e-11	8.50276e-10	2.26406e-09	4.24861e-09	6.73641e-09	9.58405e-09
0.101528	-5.16188e-11	-1.87996e-11	-5.48678e-12	2.01926e-11	7.85247e-11	2.14423e-10	4.48251e-10	8.56673e-10	1.41992e-09	-2.06818e-10	-3.24144e-10	-3.50334e-10	-2.78337e-11	8.3961e-10	2.27169e-09	4.24867e-09	6.73801e-09	9.60529e-09
0.101778	-4.23591e-11	-2.49728e-11	-1.62898e-11	2.01926e-11	8.16113e-11	2.14423e-10	4.45164e-10	8.48956e-10	1.41838e-09	-2.08316e-10	-3.27149e-10	-3.48818e-10	-3.23544e-11	8.39564e-10	2.27479e-09	4.25025e-09	6.74564e-09	9.60851e-09
0.102028	-4.39024e-11	-2.49728e-11	-1.62898e-11	1.55628e-11	8.16113e-11	2.06707e-10	4.49794e-10	8.65932e-10	1.4261e-09	-2.05293e-10	-3.25624e-10	-3.53394e-10	-2.777e-11	8.42624e-10	2.27636e-09	4.25942e-09	6.74414e-09	9.61614e-09
0.102279	-5.00755e-11	-2.49728e-11	6.86356e-13	1.86494e-11	8.31545e-11	2.20596e-10	4.49794e-10	8.61302e-10	1.41684e-09	-2.08334e-10	-3.22592e-10	-3.54946e-10	-2.1697e-11	8.44131e-10	2.28095e-09	4.26098e-09	6.74112e-09	9.61318e-09
0.102529	-4.23591e-11	-2.49728e-11	-5.48678e-12	2.17359e-11	8.31545e-11	2.1288e-10	4.45164e-10	8.58216e-10	1.41992e-09	-2.09868e-10	-3.27103e-10	-3.54964e-10	-3.08111e-11	8.38085e-10	2.28095e-09	4.25798e-09	6.74728e-09	9.62084e-09
0.102779	-4.39024e-11	-3.26892e-11	-5.48678e-12	9.38966e-12	8.31545e-11	2.06707e-10	4.52881e-10	8.62846e-10	1.42301e-09	-2.08334e-10	-3.19523e-10	-3.56408e-10	-3.08839e-11	8.45683e-10	2.27641e-09	4.26567e-09	6.76099e-09	9.63003e-09
0.103029	-3.15561e-11	-2.49728e-11	-1.01166e-11	2.17359e-11	7.54381e-11	2.1288e-10	4.49794e-10	8.64389e-10	1.42764e-09	-2.05266e-10	-3.22528e-10	-3.42791e-10	-3.39522e-11	8.47263e-10	2.28244e-09	4.27943e-09	6.75198e-09	9.63016e-09
0.103279	-4.54456e-11	-2.96026e-11	-3.9435e-12	2.17359e-11	8.0068e-11	2.11336e-10	4.51337e-10	8.78279e-10	1.42147e-09	-2.03741e-10	-3.22555e-10	-3.59458e-10	-3.70024e-11	8.4876e-10	2.27641e-09	4.27658e-09	6.76264e-09	9.64235e-09
0.103529	-4.23591e-11	-2.18862e-11	-5.48678e-12	1.40195e-11	7.08083e-11	2.14423e-10	4.48251e-10	8.61302e-10	1.4261e-09	-2.06773e-10	-3.24108e-10	-3.54928e-10	-3.39522e-11	8.42696e-10	2.28096e-09	4.29615e-09	6.76879e-09	9.64089e-09
0.103779	-3.77292e-11	-2.34295e-11	-1.16599e-11	1.71061e-11	8.0068e-11	2.1751e-10	4.43621e-10	8.70562e-10	1.43227e-09	-2.05229e-10	-3.28638e-10	-3.45768e-10	-3.08657e-11	8.47217e-10	2.28406e-09	4.25681e-09	6.76581e-09	9.63939e-09
0.104029	-4.08158e-11	-2.49728e-11	-7.03006e-12	1.09329e-11	8.16113e-11	2.0825e-10	4.52881e-10	8.59759e-10	1.43073e-09	-1.99111e-10	-3.1956e-10	-3.48755e-10	-2.78155e-11	8.44222e-10	2.28713e-09	4.29016e-09	6.77197e-09	9.64391e-09
0.104279	-4.39024e-11	-2.34295e-11	-1.32032e-11	1.71061e-11	7.38949e-11	2.09793e-10	4.51337e-10	8.58216e-10	1.4369e-09	-1.97513e-10	-3.27094e-10	-3.47284e-10	-3.08566e-11	8.4876e-10	2.2871e-09	4.29646e-09	6.78561e-09	9.63791e-09
0.104529	-5.31621e-11	-1.87996e-11	-1.47465e-11	1.71061e-11	7.85247e-11	2.1288e-10	4.49794e-10	8.69019e-10	1.42764e-09	-1.91458e-10	-3.21003e-10	-3.53348e-10	-3.23908e-11	8.45756e-10	2.27958e-09	4.29496e-09	6.7644e-09	9.65013e-09
0.104779	-3.92725e-11	-2.6516e-11	-2.40021e-12	2.01926e-11	8.31545e-11	2.0825e-10	4.52881e-10	8.62846e-10	1.43227e-09	-2.00554e-10	-3.14912e-10	-3.488e-10	-3.09021e-11	8.48824e-10	2.29617e-09	4.29341e-09	6.77501e-09	9.65938e-09
0.105029	-4.23591e-11	-1.87996e-11	-1.32032e-11	1.86494e-11	8.16113e-11	2.22139e-10	4.55967e-10	8.70562e-10	1.4369e-09	-1.97586e-10	-3.22473e-10	-3.47212e-10	-3.54955e-11	8.54925e-10	2.27346e-09	4.29039e-09	6.78427e-09	9.66401e-09
0.105279	-4.69889e-11	-2.6516e-11	-5.48678e-12	1.71061e-11	7.23516e-11	2.1288e-10	4.48251e-10	8.75192e-10	1.44307e-09	-2.02106e-10	-3.18017e-10	-3.4112e-10	-3.9998e-11	8.51838e-10	2.28401e-09	4.29804e-09	6.79194e-09	9.66405e-09
0.105529	-4.23591e-11	-2.96026e-11	-1.32032e-11	1.86494e-11	8.16113e-11	2.11336e-10	4.54424e-10	8.59759e-10	1.43999e-09	-1.96088e-10	-3.30153e-10	-3.44198e-10	-2.33403e-11	8.39692e-10	2.28716e-09	4.30421e-09	6.79043e-09	9.66561e-09
0.10578	-4.08158e-11	-2.80593e-11	-1.01166e-11	1.09329e-11	7.38949e-11	2.15966e-10	4.52881e-10	8.61302e-10	1.4261e-09	-2.05166e-10	-3.2408e-10	-3.5481e-10	-3.84638e-11	8.5182e-10	2.29336e-09	4.30877e-09	6.78591e-09	9.67174e-09
0.10603	-4.85322e-11	-2.18862e-11	-1.16599e-11	1.24762e-11	8.31545e-11	2.1751e-10	4.51337e-10	8.70562e-10	1.44153e-09	-1.99111e-10	-3.16437e-10	-3.41166e-10	-3.39886e-11	8.51911e-10	2.30704e-09	4.30123e-09	6.79658e-09	9.67494e-09
0.10628	-3.46427e-11	-2.6516e-11	-7.03006e-12	2.48225e-11	8.46978e-11	2.19053e-10	4.52881e-10	8.75192e-10	1.43999e-09	-1.97531e-10	-3.19432e-10	-3.44161e-10	-3.54318e-11	8.54897e-10	2.29346e-09	4.31028e-09	6.79969e-09	9.69468e-09
0.10653	-5.16188e-11	-2.6516e-11	-2.55495e-11	2.32792e-11	8.0068e-11	2.19053e-10	4.54424e-10	8.64389e-10	1.43999e-09	-1.94463e-10	-3.17935e-10	-3.48755e-10	-2.63268e-11	8.4424e-10	2.30402e-09	4.30124e-09	6.79981e-09	9.67662e-09
0.10678	-4.69889e-11	-2.49728e-11	-1.16599e-11	1.71061e-11	8.62411e-11	2.1288e-10	4.5751e-10	8.70562e-10	1.43536e-09	-1.92938e-10	-3.19441e-10	-3.48755e-10	-3.23726e-11	8.44176e-10	2.29802e-09	4.31035e-09	6.81654e-09	9.69786e-09
0.10703	-4.54456e-11	-1.26265e-11	-8.57335e-12	1.71061e-11	7.08083e-11	2.23683e-10	4.52881e-10	8.73649e-10	1.45233e-09	-1.95961e-10	-3.17944e-10	-3.44189e-10	-3.23635e-11	8.44222e-10	2.30417e-09	4.31347e-09	6.80901e-09	9.69655e-09
0.10728	-3.77292e-11	-3.42325e-11	-5.48678e-12	1.55628e-11	8.77844e-11	2.19053e-10	4.52881e-10	8.81365e-10	1.43999e-09	-1.92947e-10	-3.21048e-10	-3.45659e-10	-2.47835e-11	8.51947e-10	2.31789e-09	4.31505e-09	6.80904e-09	9.71176e-09
0.10753	-4.54456e-11	-2.80593e-11	-1.47465e-11	1.71061e-11	8.16113e-11	2.22139e-10	4.43621e-10	8.76735e-10	1.46005e-09	-1.9597e-10	-3.31651e-10	-3.41093e-10	-3.2318e-11	8.68587e-10	2.31185e-09	4.32116e-09	6.82121e-09	9.70723e-09
0.10778	-4.69889e-11	-2.96026e-11	-8.57335e-12	2.48225e-11	8.31545e-11	2.1288e-10	4.60597e-10	8.81365e-10	1.45079e-09	-1.94426e-10	-3.16491e-10	-3.41102e-10	-2.48017e-11	8.38276e-10	2.30726e-09	4.32123e-09	6.81676e-09	9.69815e-09
0.10803	-4.85322e-11	-2.34295e-11	-1.16599e-11	2.01926e-11	7.85247e-11	2.14423e-10	4.54424e-10	8.76735e-10	1.43381e-09	-1.88362e-10	-3.20957e-10	-3.47212e-10	-3.53863e-11	8.53317e-10	2.3118e-09	4.32732e-09	6.82599e-09	9.71486e-09
0.10828	-3.92725e-11	-2.34295e-11	-1.16599e-11	9.38966e-12	7.85247e-11	2.15966e-10	4.49794e-10	8.73649e-10	1.44153e-09	-1.95997e-10	-3.17907e-10	-3.48746e-10	-2.78519e-11	8.48842e-10	2.31034e-09	4.32583e-09	6.84279e-09	9.71352e-09
0.10853	-3.92725e-11	-3.11459e-11	-1.16599e-11	7.84638e-12	8.0068e-11	2.1288e-10	4.45164e-10	8.75192e-10	1.45079e-09	-2.03604e-10	-3.13277e-10	-3.44216e-10	-3.23726e-11	8.50367e-10	2.31641e-09	4.32589e-09	6.83829e-09	9.72722e-09
0.10878	-4.39024e-11	-2.49728e-11	-8.5693e-13	1.71061e-11	8.77844e-11	2.1751e-10	4.52881e-10	8.76735e-10	1.44461e-09	-1.9302e-10	-3.0725e-10	-3.50253e-10	-3.09112e-11	8.5497e-10	2.31342e-09	4.33661e-09	6.83379e-09	9.72434e-09
0.10903	-4.39024e-11	-2.6516e-11	-1.32032e-11	1.40195e-11	8.62411e-11	2.19053e-10	4.49794e-10	8.69019e-10	1.44307e-09	-2.00518e-10	-3.23944e-10	-3.4418e-10	-3.69751e-11	8.58002e-10	2.31643e-09	4.34432e-09	6.85048e-09	9.73954e-09
0.109281	-5.16188e-11	-2.80593e-11	-8.57335e-12	2.01926e-11	7.85247e-11	2.1288e-10	4.5751e-10	8.70562e-10	1.44924e-09	-1.89969e-10	-3.16446e-10	-3.42609e-10	-3.24272e-11	8.50404e-10	2.31338e-09	4.34741e-09	6.8414e-09	9.73356e-09
0.109531	-4.54456e-11	-3.42325e-11	-1.62898e-11	1.86494e-11	8.46978e-11	2.1288e-10	4.51337e-10	8.76735e-10	1.44924e-09	-2.03586e-10	-3.20967e-10	-3.41029e-10	-3.0893e-11	8.51938e-10	2.31036e-09	4.34744e-09	6.83678e-09	9.73967e-09
0.109781	-3.77292e-11	-1.87996e-11	-8.57335e-12	1.71061e-11	7.85247e-11	2.11336e-10	4.54424e-10	8.76735e-10	1.45079e-09	-1.96097e-10	-3.19432e-10	-3.33468e-10	-3.39067e-11	8.61089e-10	2.31798e-09	4.34895e-09	6.83832e-09	9.7474e-09
0.110031	-4.54456e-11	-3.57757e-11	-1.47465e-11	1.55628e-11	7.85247e-11	2.20596e-10	4.55967e-10	8.79822e-10	1.44307e-09	-2.05157e-10	-3.13323e-10	-3.45641e-10	-2.9377e-11	8.59636e-10	2.31958e-09	4.34596e-09	6.84452e-09	9.7581e-09
0.110281	-4.08158e-11	-2.80593e-11	-1.01166e-11	1.71061e-11	8.62411e-11	2.11336e-10	4.59054e-10	8.79822e-10	1.45233e-09	-1.97631e-10	-3.13305e-10	-3.48727e-10	-3.39067e-11	8.62604e-10	2.32568e-09	4.35508e-09	6.85983e-09	9.75514e-09
0.110531	-3.77292e-11	-2.03429e-11	-8.57335e-12	2.01926e-11	7.54381e-11	2.20596e-10	4.59054e-10	8.82908e-10	1.44616e-09	-2.05184e-10	-3.16337e-10	-3.427e-10	-3.08839e-11	8.50458e-10	2.3242e-09	4.3536e-09	6.86452e-09	9.7597e-09
0.110781	-5.62486e-11	-3.26892e-11	-1.01166e-11	1.55628e-11	7.85247e-11	2.11336e-10	4.54424e-10	8.87538e-10	1.45542e-09	-2.00627e-10	-3.13296e-10	-3.51823e-10	-3.08293e-11	8.56477e-10	2.32568e-09	4.3521e-09	6.86911e-09	9.7598e-09
0.111031	-5.00755e-11	-1.72563e-11	-5.48678e-12	1.71061e-11	7.85247e-11	2.22139e-10	4.63684e-10	8.82908e-10	1.44461e-09	-1.96024e-10	-3.1178e-10	-3.53403e-10	-2.47653e-11	8.54961e-10	2.31962e-09	4.35667e-09	6.86612e-09	9.77203e-09
0.111281	-4.54456e-11	-3.11459e-11	-7.03006e-12	2.32792e-11	7.69814e-11	2.14423e-10	4.59054e-10	8.84452e-10	1.4585e-09	-1.96033e-10	-3.16355e-10	-3.53357e-10	-3.08202e-11	8.5044e-10	2.32418e-09	4.35824e-09	6.87221e-09	9.77817e-09
0.111531	-4.69889e-11	-2.6516e-11	-1.47465e-11	7.84638e-12	8.16113e-11	2.15966e-10	4.55967e-10	8.70562e-10	1.45387e-09	-2.02116e-10	-3.17944e-10	-3.44198e-10	-2.93861e-11	8.61061e-10	2.32724e-09	4.36131e-09	6.87386e-09	9.77215e-09
0.111781	-4.69889e-11	-2.03429e-11	-1.01166e-11	1.86494e-11	8.16113e-11	2.22139e-10	4.6214e-10	8.81365e-10	1.47857e-09	-1.99074e-10	-3.23962e-10	-3.42664e-10	-3.84547e-11	8.56613e-10	2.32425e-09	4.36289e-09	6.88758e-09	9.77971e-09
0.112031	-4.69889e-11	-2.80593e-11	-3.9435e-12	2.01926e-11	8.46978e-11	2.1288e-10	4.60597e-10	8.82908e-10	1.46313e-09	-1.94508e-10	-3.08775e-10	-3.5028e-10	-2.6345e-11	8.67234e-10	2.33189e-09	4.36902e-09	6.88614e-09	9.77527e-09
0.112281	-4.54456e-11	-2.6516e-11	-1.01166e-11	2.01926e-11	8.31545e-11	2.11336e-10	4.59054e-10	8.76735e-10	1.46776e-09	-1.99047e-10	-3.13268e-10	-3.50353e-10	-3.23817e-11	8.62732e-10	2.338e-09	4.37213e-09	6.88614e-09	9.78898e-09
0.112531	-4.69889e-11	-2.49728e-11	-1.7833e-11	1.55628e-11	7.23516e-11	2.15966e-10	4.60597e-10	8.87538e-10	1.45696e-09	-1.97604e-10	-3.14784e-10	-3.54819e-10	-3.39522e-11	8.64221e-10	2.33198e-09	4.37673e-09	6.8877e-09	9.79213e-09
0.112782	-3.92725e-11	-2.80593e-11	-8.57335e-12	1.55628e-11	7.85247e-11	2.23683e-10	4.59054e-10	8.98341e-10	1.45696e-09	-2.06682e-10	-3.08711e-10	-3.3659e-10	-3.54682e-11	8.62668e-10	2.33954e-09	4.37824e-09	6.89385e-09	9.79369e-09
0.113032	-4.54456e-11	-2.03429e-11	-1.16599e-11	2.48225e-11	9.0871e-11	2.14423e-10	4.5751e-10	8.81365e-10	1.45542e-09	-1.96061e-10	-3.11689e-10	-3.44143e-10	-3.24726e-11	8.56559e-10	2.3335e-09	4.37069e-09	6.89997e-09	9.79839e-09
0.113282	-4.39024e-11	-2.49728e-11	-1.16599e-11	3.21653e-12	7.38949e-11	2.1288e-10	4.60597e-10	8.85995e-10	1.46159e-09	-1.96015e-10	-3.05688e-10	-3.50298e-10	-4.00071e-11	8.56522e-10	2.33649e-09	4.38127e-09	6.89693e-09	9.81664e-09
0.113532	-4.39024e-11	-2.03429e-11	-8.57335e-12	1.55628e-11	8.77844e-11	2.1288e-10	4.6214e-10	8.87538e-10	1.46931e-09	-1.99084e-10	-3.19296e-10	-3.51832e-10	-2.78792e-11	8.56586e-10	2.33347e-09	4.37376e-09	6.89393e-09	9.80462e-09
0.113782	-4.69889e-11	-2.80593e-11	-1.7833e-11	1.55628e-11	7.38949e-11	2.20596e-10	4.69857e-10	8.73649e-10	1.46776e-09	-2.02106e-10	-3.05743e-10	-3.47257e-10	-3.22998e-11	8.67253e-10	2.335e-09	4.38128e-09	6.90452e-09	9.81527e-09
0.114032	-4.54456e-11	-1.87996e-11	-5.48678e-12	1.40195e-11	8.16113e-11	2.15966e-10	4.68313e-10	8.84452e-10	1.46005e-09	-1.94499e-10	-3.20885e-10	-3.45696e-10	-1.87014e-11	8.65773e-10	2.33811e-09	4.3722e-09	6.89396e-09	9.82455e-09
0.114282	-5.16188e-11	-1.87996e-11	-3.9435e-12	1.55628e-11	7.85247e-11	2.1288e-10	4.5751e-10	8.87538e-10	1.46159e-09	-1.94472e-10	-3.16382e-10	-3.4417e-10	-3.53226e-11	8.62723e-10	2.3472e-09	4.37674e-09	6.90151e-09	9.83513e-09
0.114532	-3.46427e-11	-2.49728e-11	-1.01166e-11	1.55628e-11	8.0068e-11	2.15966e-10	4.6214e-10	8.87538e-10	1.46468e-09	-1.97504e-10	-3.13268e-10	-3.45686e-10	-2.32766e-11	8.64202e-10	2.33361e-09	4.3799e-09	6.90012e-09	9.80936e-09
0.114782	-4.69889e-11	-1.72563e-11	-1.32032e-11	1.71061e-11	8.31545e-11	2.22139e-10	4.72943e-10	8.92168e-10	1.47085e-09	-1.94499e-10	-3.07141e-10	-3.4575e-10	-3.23453e-11	8.59691e-10	2.34726e-09	4.3936e-09	6.91544e-09	9.82601e-09
0.115032	-6.3965e-11	-3.26892e-11	-8.5693e-13	1.71061e-11	8.46978e-11	2.22139e-10	4.5751e-10	8.99885e-10	1.47394e-09	-1.99038e-10	-3.05607e-10	-3.54873e-10	-3.08384e-11	8.68796e-10	2.34887e-09	4.38607e-09	6.92765e-09	9.83072e-09
0.115282	-5.16188e-11	-2.49728e-11	-1.62898e-11	1.09329e-11	7.69814e-11	2.1751e-10	4.5751e-10	9.01428e-10	1.47548e-09	-1.96024e-10	-3.10154e-10	-3.5038e-10	-2.47744e-11	8.65809e-10	2.34888e-09	4.38757e-09	6.91552e-09	9.83687e-09
0.115532	-4.54456e-11	-1.87996e-11	-5.48678e-12	9.38966e-12	8.16113e-11	2.14423e-10	4.69857e-10	9.01428e-10	1.46931e-09	-1.97558e-10	-3.07195e-10	-3.54882e-10	-3.23908e-11	8.67289e-10	2.34884e-09	4.3921e-09	6.91393e-09	9.83999e-09
0.115782	-4.23591e-11	-3.11459e-11	-1.16599e-11	2.01926e-11	7.69814e-11	2.23683e-10	4.65227e-10	8.96798e-10	1.46931e-09	-2.02088e-10	-3.17862e-10	-3.47312e-10	-3.70297e-11	8.62768e-10	2.34277e-09	4.38302e-09	6.91548e-09	9.8462e-09
0.116032	-5.00755e-11	-2.80593e-11	-1.32032e-11	7.84638e-12	8.31545e-11	2.23683e-10	4.69857e-10	8.95255e-10	1.46622e-09	-1.92965e-10	-3.19405e-10	-3.51796e-10	-4.00617e-11	8.70339e-10	2.34733e-09	4.38904e-09	6.92155e-09	9.86148e-09
0.116282	-2.69262e-11	-3.26892e-11	-1.16599e-11	1.40195e-11	8.16113e-11	2.22139e-10	4.6677e-10	8.96798e-10	1.47085e-09	-1.92965e-10	-3.11816e-10	-3.44225e-10	-3.24181e-11	8.65791e-10	2.35193e-09	4.38604e-09	6.91558e-09	9.86004e-09
0.116533	-4.23591e-11	-2.34295e-11	-3.9435e-12	2.01926e-11	8.31545e-11	2.23683e-10	4.6214e-10	8.95255e-10	1.47239e-09	-2.02116e-10	-3.16319e-10	-3.48709e-10	-2.6254e-11	8.62714e-10	2.35039e-09	4.38768e-09	6.93074e-09	9.8585e-09
0.116783	-4.08158e-11	-2.6516e-11	-1.16599e-11	2.17359e-11	7.38949e-11	2.1288e-10	4.6677e-10	8.98341e-10	1.47239e-09	-2.02134e-10	-3.11789e-10	-3.41157e-10	-2.31765e-11	8.62741e-10	2.34437e-09	4.41039e-09	6.92175e-09	9.85711e-09
0.117033	-3.77292e-11	-1.87996e-11	-3.9435e-12	1.71061e-11	7.85247e-11	2.1288e-10	4.69857e-10	8.89082e-10	1.48937e-09	-1.96024e-10	-3.14803e-10	-3.487e-10	-2.47471e-11	8.70303e-10	2.35799e-09	4.38018e-09	6.93387e-09	9.88139e-09
0.117283	-4.69889e-11	-2.6516e-11	-7.03006e-12	1.55628e-11	8.62411e-11	2.11336e-10	4.6677e-10	8.95255e-10	1.47085e-09	-1.94463e-10	-3.13296e-10	-3.42709e-10	-3.54227e-11	8.59718e-10	2.34744e-09	4.4059e-09	6.92949e-09	9.86329e-09
0.117533	-4.85322e-11	-2.6516e-11	-1.01166e-11	1.24762e-11	7.38949e-11	2.1288e-10	4.714e-10	9.02971e-10	1.47239e-09	-1.94445e-10	-3.1325e-10	-3.53266e-10	-3.39613e-11	8.67234e-10	2.35501e-09	4.40299e-09	6.94906e-09	9.87241e-09
0.117783	-4.54456e-11	-2.6516e-11	-1.7833e-11	9.38966e-12	8.62411e-11	2.26769e-10	4.74487e-10	8.99885e-10	1.47239e-09	-1.92929e-10	-3.0715e-10	-3.39641e-10	-3.39431e-11	8.597e-10	2.35513e-09	4.39991e-09	6.91122e-09	9.88613e-09
0.118033	-4.39024e-11	-2.96026e-11	-5.48678e-12	2.17359e-11	7.85247e-11	2.1751e-10	4.6677e-10	9.07601e-10	1.47085e-09	-1.94426e-10	-3.07159e-10	-3.45623e-10	-3.23908e-11	8.67316e-10	2.3687e-09	4.39838e-09	6.93996e-09	9.87561e-09
0.118283	-3.77292e-11	-2.49728e-11	-7.03006e-12	1.86494e-11	8.46978e-11	2.23683e-10	4.714e-10	9.06058e-10	1.47085e-09	-1.91394e-10	-3.1473e-10	-3.39531e-10	-2.78701e-11	8.73362e-10	2.34297e-09	4.39988e-09	6.93868e-09	9.88776e-09
0.118533	-4.08158e-11	-2.34295e-11	-1.16599e-11	1.86494e-11	8.46978e-11	2.1751e-10	4.714e-10	9.02971e-10	1.48011e-09	-1.92874e-10	-3.05616e-10	-3.34929e-10	-3.84456e-11	8.56686e-10	2.36111e-09	4.39841e-09	6.94933e-09	9.89087e-09
0.118783	-3.61859e-11	-3.11459e-11	-8.57335e-12	2.17359e-11	8.0068e-11	2.20596e-10	4.72943e-10	9.02971e-10	1.47857e-09	-1.8829e-10	-3.04109e-10	-3.36518e-10	-2.63086e-11	8.67271e-10	2.36128e-09	4.40602e-09	6.9479e-09	9.88784e-09
0.119033	-4.69889e-11	-2.49728e-11	-8.57335e-12	1.71061e-11	7.54381e-11	2.1751e-10	4.72943e-10	9.04514e-10	1.48011e-09	-1.85249e-10	-3.163e-10	-3.51796e-10	-2.62631e-11	8.68869e-10	2.37038e-09	4.40457e-09	6.95248e-09	9.88788e-09
0.119283	-4.69889e-11	-2.96026e-11	-8.57335e-12	1.71061e-11	8.62411e-11	2.25226e-10	4.6677e-10	8.90625e-10	1.48165e-09	-1.91303e-10	-3.16309e-10	-3.54864e-10	-3.08202e-11	8.70394e-10	2.36282e-09	4.40908e-09	6.95548e-09	9.8986e-09
0.119533	-4.54456e-11	-2.03429e-11	-5.48678e-12	1.71061e-11	8.31545e-11	2.0825e-10	4.6677e-10	9.09144e-10	1.48628e-09	-1.86801e-10	-3.05625e-10	-3.42745e-10	-2.78428e-11	8.68841e-10	2.36429e-09	4.40002e-09	6.94186e-09	9.9063e-09
0.119783	-4.08158e-11	-2.03429e-11	-2.09196e-11	1.09329e-11	7.08083e-11	2.20596e-10	4.68313e-10	9.07601e-10	1.47857e-09	-1.92819e-10	-3.04027e-10	-3.53285e-10	-3.54045e-11	8.62796e-10	2.36276e-09	4.41065e-09	6.95706e-09	9.90791e-09
0.120034	-4.39024e-11	-2.6516e-11	-8.57335e-12	1.40195e-11	8.62411e-11	2.11336e-10	4.69857e-10	9.04514e-10	1.48783e-09	-1.83751e-10	-3.02547e-10	-3.42691e-10	-2.78337e-11	8.73435e-10	2.35974e-09	4.41227e-09	6.96173e-09	9.91408e-09
0.120284	-4.39024e-11	-1.57131e-11	-7.03006e-12	1.86494e-11	7.85247e-11	2.20596e-10	4.7603e-10	9.01428e-10	1.48628e-09	-1.91294e-10	-3.11707e-10	-3.45677e-10	-2.93679e-11	8.73444e-10	2.36585e-09	4.4184e-09	6.96331e-09	9.92477e-09
0.120534	-4.69889e-11	-4.19489e-11	-1.01166e-11	1.24762e-11	8.16113e-11	2.1751e-10	4.69857e-10	9.16861e-10	1.48937e-09	-1.86774e-10	-3.14775e-10	-3.45714e-10	-3.84456e-11	8.64466e-10	2.37199e-09	4.42148e-09	6.96801e-09	9.92029e-09
0.120784	-4.39024e-11	-1.87996e-11	-2.09196e-11	1.24762e-11	7.69814e-11	2.22139e-10	4.68313e-10	9.01428e-10	1.50789e-09	-1.88299e-10	-3.08648e-10	-3.48755e-10	-2.47744e-11	8.93179e-10	2.37205e-09	4.41994e-09	6.98629e-09	9.92635e-09
0.121034	-4.39024e-11	-1.72563e-11	-1.93763e-11	1.86494e-11	6.9265e-11	2.23683e-10	4.714e-10	9.07601e-10	1.48628e-09	-1.92883e-10	-3.01059e-10	-3.47257e-10	-2.47107e-11	8.58357e-10	2.37502e-09	4.41386e-09	6.97879e-09	9.92331e-09
0.121284	-4.69889e-11	-2.03429e-11	-8.57335e-12	1.09329e-11	8.0068e-11	2.28313e-10	4.6677e-10	9.15317e-10	1.48937e-09	-1.92856e-10	-3.13177e-10	-3.48818e-10	-2.77973e-11	8.71882e-10	2.36287e-09	4.41991e-09	6.98182e-09	9.92032e-09
0.121534	-4.69889e-11	-2.49728e-11	-2.40021e-12	1.24762e-11	8.62411e-11	2.19053e-10	4.8529e-10	9.07601e-10	1.49709e-09	-1.83769e-10	-3.07186e-10	-3.5638e-10	-3.39067e-11	8.73508e-10	2.36739e-09	4.41695e-09	6.9864e-09	9.93259e-09
0.121784	-4.54456e-11	-1.87996e-11	-1.32032e-11	9.38966e-12	8.31545e-11	2.1288e-10	4.714e-10	9.04514e-10	1.49554e-09	-1.94408e-10	-3.13114e-10	-3.44261e-10	-3.24544e-11	8.76503e-10	2.37047e-09	4.4261e-09	6.98337e-09	9.94795e-09
0.122034	-5.47053e-11	-2.96026e-11	-1.7833e-11	1.86494e-11	8.16113e-11	2.20596e-10	4.77573e-10	8.99885e-10	1.49091e-09	-1.97495e-10	-2.90419e-10	-3.50289e-10	-3.84547e-11	8.65882e-10	2.37208e-09	4.42918e-09	6.9819e-09	9.95411e-09
0.122284	-5.31621e-11	-1.87996e-11	-7.03006e-12	2.17359e-11	8.0068e-11	2.19053e-10	4.77573e-10	9.09144e-10	1.49554e-09	-1.93001e-10	-3.14593e-10	-3.5028e-10	-2.33221e-11	8.71892e-10	2.38278e-09	4.42468e-09	6.99406e-09	9.94802e-09
0.122534	-4.39024e-11	-2.49728e-11	-8.57335e-12	1.86494e-11	8.62411e-11	2.19053e-10	4.69857e-10	9.02971e-10	1.49091e-09	-2.0355e-10	-2.99497e-10	-3.42664e-10	-3.69205e-11	8.67407e-10	2.38434e-09	4.43382e-09	6.98956e-09	9.94494e-09
0.122784	-4.39024e-11	-2.03429e-11	-7.03006e-12	1.55628e-11	8.46978e-11	2.1751e-10	4.714e-10	9.07601e-10	1.49709e-09	-1.86883e-10	-3.00931e-10	-3.44161e-10	-3.09294e-11	8.76512e-10	2.37981e-09	4.43692e-09	6.98959e-09	9.945e-09
0.123034	-5.16188e-11	-2.18862e-11	-1.01166e-11	1.24762e-11	8.16113e-11	2.09793e-10	4.7603e-10	9.07601e-10	1.5048e-09	-1.9439e-10	-3.00949e-10	-3.47221e-10	-3.54227e-11	8.73498e-10	2.38581e-09	4.43695e-09	7.00013e-09	9.95877e-09
0.123284	-6.3965e-11	-2.96026e-11	-7.03006e-12	2.01926e-11	8.46978e-11	2.22139e-10	4.714e-10	8.99885e-10	1.5048e-09	-1.91394e-10	-3.02456e-10	-3.47266e-10	-2.78519e-11	8.70439e-10	2.37366e-09	4.43848e-09	6.97751e-09	9.96644e-09
0.123535	-4.08158e-11	-2.49728e-11	-7.03006e-12	1.71061e-11	7.85247e-11	2.23683e-10	4.714e-10	9.09144e-10	1.494e-09	-1.92974e-10	-2.99406e-10	-3.51805e-10	-3.23726e-11	8.71937e-10	2.37667e-09	4.43999e-09	7.00938e-09	9.96037e-09
0.123785	-3.46427e-11	-2.6516e-11	-7.03006e-12	1.40195e-11	8.16113e-11	2.1751e-10	4.79116e-10	9.04514e-10	1.49091e-09	-2.05129e-10	-2.97881e-10	-3.45714e-10	-3.08293e-11	8.70403e-10	2.38275e-09	4.4355e-09	7.00659e-09	9.95732e-09
0.124035	-5.31621e-11	-2.6516e-11	-8.57335e-12	2.01926e-11	8.31545e-11	2.09793e-10	4.83746e-10	9.06058e-10	1.494e-09	-1.96052e-10	-3.00895e-10	-3.42654e-10	-2.3222e-11	8.6738e-10	2.3752e-09	4.44764e-09	7.01726e-09	9.9634e-09
0.124285	-4.69889e-11	-2.49728e-11	-1.32032e-11	2.32792e-11	7.08083e-11	2.29856e-10	4.69857e-10	9.04514e-10	1.5048e-09	-1.95979e-10	-2.96411e-10	-3.47202e-10	-2.77336e-11	8.73453e-10	2.38278e-09	4.44316e-09	7.01885e-09	9.96345e-09
0.124535	-5.16188e-11	-2.49728e-11	-2.40021e-12	1.71061e-11	7.85247e-11	2.19053e-10	4.8066e-10	9.09144e-10	1.48474e-09	-1.92929e-10	-3.08529e-10	-3.4575e-10	-2.47744e-11	8.71964e-10	2.3813e-09	4.44621e-09	7.02042e-09	9.96502e-09
0.124785	-5.00755e-11	-2.6516e-11	-1.16599e-11	9.38966e-12	6.77217e-11	2.23683e-10	4.74487e-10	9.18404e-10	1.494e-09	-1.9291e-10	-2.99497e-10	-3.53348e-10	-3.54045e-11	8.71928e-10	2.38285e-09	4.45079e-09	7.02651e-09	9.97267e-09
0.125035	-4.54456e-11	-3.26892e-11	-1.01166e-11	1.86494e-11	8.31545e-11	2.20596e-10	4.79116e-10	9.13774e-10	1.49863e-09	-1.92865e-10	-3.06968e-10	-3.50307e-10	-3.08839e-11	8.67362e-10	2.38745e-09	4.44931e-09	7.02201e-09	9.97578e-09
0.125285	-5.16188e-11	-2.34295e-11	-8.57335e-12	1.09329e-11	8.62411e-11	2.20596e-10	4.74487e-10	9.2612e-10	1.50326e-09	-1.85285e-10	-2.90328e-10	-3.44198e-10	-2.94043e-11	8.68887e-10	2.39053e-09	4.45235e-09	7.0296e-09	9.97886e-09
0.125535	-4.08158e-11	-3.42325e-11	-1.16599e-11	1.71061e-11	8.77844e-11	2.22139e-10	4.83746e-10	9.27664e-10	1.49863e-09	-1.92847e-10	-3.05452e-10	-3.45696e-10	-4.15595e-11	8.73462e-10	2.39054e-09	4.45086e-09	7.02813e-09	9.98042e-09
0.125785	-3.92725e-11	-2.34295e-11	-1.32032e-11	2.01926e-11	7.85247e-11	2.20596e-10	4.83746e-10	9.16861e-10	1.49554e-09	-1.89824e-10	-3.0094e-10	-3.47248e-10	-3.55319e-11	8.72028e-10	2.38906e-09	4.45393e-09	7.02976e-09	9.98357e-09
0.126035	-5.00755e-11	-2.6516e-11	-1.47465e-11	1.09329e-11	8.16113e-11	2.14423e-10	4.77573e-10	9.10688e-10	1.494e-09	-1.86774e-10	-2.96338e-10	-3.50262e-10	-3.54591e-11	8.82667e-10	2.39662e-09	4.46012e-09	7.048e-09	9.99735e-09
0.126285	-5.77919e-11	-2.6516e-11	-7.03006e-12	2.79091e-11	9.85874e-11	2.11336e-10	4.7603e-10	9.10688e-10	1.50326e-09	-1.89851e-10	-2.96356e-10	-3.42673e-10	-2.93588e-11	8.7811e-10	2.38753e-09	4.4708e-09	7.03745e-09	1.0005e-08
0.126535	-4.69889e-11	-2.80593e-11	-1.32032e-11	1.67324e-12	6.61784e-11	2.15966e-10	4.74487e-10	9.10688e-10	1.5048e-09	-1.97495e-10	-3.03945e-10	-3.45705e-10	-2.93315e-11	8.70494e-10	2.39051e-09	4.46633e-09	7.0389e-09	9.99748e-09
0.126785	-4.54456e-11	-2.96026e-11	-1.01166e-11	1.55628e-11	8.0068e-11	2.22139e-10	4.7603e-10	9.24577e-10	1.49091e-09	-1.9744e-10	-2.97917e-10	-3.5028e-10	-3.08748e-11	8.76567e-10	2.38751e-09	4.47237e-09	7.03746e-09	1.00051e-08
0.127035	-4.39024e-11	-2.49728e-11	-1.01166e-11	1.86494e-11	8.46978e-11	2.09793e-10	4.8529e-10	9.09144e-10	1.50172e-09	-1.80728e-10	-3.0242e-10	-3.47284e-10	-3.38703e-11	8.79608e-10	2.3936e-09	4.46789e-09	7.05123e-09	1.00066e-08
0.127286	-4.39024e-11	-2.34295e-11	-1.47465e-11	1.55628e-11	8.16113e-11	2.20596e-10	4.8529e-10	9.16861e-10	1.5048e-09	-1.91249e-10	-2.96411e-10	-3.51814e-10	-2.32857e-11	8.7201e-10	2.3936e-09	4.47705e-09	7.0589e-09	1.00069e-08
0.127536	-4.54456e-11	-2.03429e-11	-8.57335e-12	1.09329e-11	8.0068e-11	2.29856e-10	4.79116e-10	9.13774e-10	1.51406e-09	-1.82198e-10	-3.07032e-10	-3.47266e-10	-3.53954e-11	8.73498e-10	2.38751e-09	4.48317e-09	7.05285e-09	1.00433e-08
0.127786	-4.54456e-11	-2.80593e-11	-1.01166e-11	1.55628e-11	8.0068e-11	2.19053e-10	4.88376e-10	9.04514e-10	1.50789e-09	-1.88262e-10	-3.04e-10	-3.47221e-10	-3.09567e-11	8.75069e-10	2.39056e-09	4.47709e-09	7.05439e-09	1.0007e-08
0.128036	-3.92725e-11	-2.49728e-11	-1.47465e-11	2.17359e-11	8.62411e-11	2.25226e-10	4.69857e-10	9.07601e-10	1.50635e-09	-1.9134e-10	-2.96401e-10	-3.44189e-10	-4.15413e-11	8.81124e-10	2.39667e-09	4.47554e-09	7.06203e-09	1.00266e-08
0.128286	-4.39024e-11	-2.34295e-11	-1.16599e-11	1.09329e-11	8.0068e-11	2.23683e-10	4.77573e-10	9.16861e-10	1.50635e-09	-1.89724e-10	-3.03963e-10	-3.47275e-10	-3.09567e-11	8.71992e-10	2.39516e-09	4.4771e-09	7.06361e-09	1.00313e-08
0.128536	-4.69889e-11	-2.6516e-11	-3.9435e-12	1.71061e-11	8.31545e-11	2.28313e-10	4.8066e-10	9.21491e-10	1.52024e-09	-1.71459e-10	-3.00977e-10	-3.56353e-10	-3.545e-11	8.68905e-10	2.39065e-09	4.4847e-09	7.06517e-09	1.00222e-08
0.128786	-4.69889e-11	-2.80593e-11	-1.16599e-11	1.71061e-11	7.38949e-11	2.23683e-10	4.8529e-10	9.16861e-10	1.51406e-09	-1.78994e-10	-3.03954e-10	-3.41229e-10	-3.24453e-11	8.71946e-10	2.40276e-09	4.47874e-09	7.06974e-09	1.00343e-08
0.129036	-4.54456e-11	-2.6516e-11	-1.16599e-11	2.48225e-11	8.46978e-11	2.22139e-10	4.79116e-10	9.12231e-10	1.51715e-09	-1.82098e-10	-2.94913e-10	-3.5333e-10	-3.54409e-11	8.73517e-10	2.39219e-09	4.49548e-09	7.06679e-09	1.00283e-08
0.129286	-4.08158e-11	-2.34295e-11	-8.57335e-12	1.24762e-11	9.0871e-11	2.19053e-10	4.714e-10	9.13774e-10	1.51561e-09	-1.83578e-10	-3.10073e-10	-3.51923e-10	-2.9377e-11	8.78074e-10	2.39825e-09	4.49401e-09	7.07893e-09	1.00329e-08
0.129536	-4.39024e-11	-1.87996e-11	-1.62898e-11	1.24762e-11	8.31545e-11	2.1288e-10	4.8529e-10	9.07601e-10	1.51252e-09	-1.73012e-10	-3.04027e-10	-3.59467e-10	-3.23635e-11	8.73617e-10	2.40284e-09	4.48646e-09	7.07302e-09	1.0042e-08
0.129786	-4.39024e-11	-2.03429e-11	-1.93763e-11	9.38966e-12	7.38949e-11	2.22139e-10	4.79116e-10	9.10688e-10	1.50789e-09	-1.89696e-10	-2.97917e-10	-3.47312e-10	-2.78246e-11	8.88804e-10	2.39828e-09	4.50177e-09	7.09277e-09	1.0033e-08
0.130036	-4.39024e-11	-2.6516e-11	-5.48678e-12	2.17359e-11	8.93277e-11	2.25226e-10	4.82203e-10	9.19947e-10	1.51869e-09	-1.85258e-10	-3.02438e-10	-3.47212e-10	-3.08475e-11	8.82785e-10	2.39675e-09	4.51841e-09	7.0853e-09	1.00406e-08
0.130286	-4.39024e-11	-3.11459e-11	-1.32032e-11	2.17359e-11	7.85247e-11	2.26769e-10	4.83746e-10	9.21491e-10	1.52332e-09	-1.91258e-10	-2.99379e-10	-3.42664e-10	-3.08657e-11	8.81224e-10	2.39977e-09	4.48053e-09	7.09132e-09	1.00422e-08
0.130536	-5.31621e-11	-2.03429e-11	-8.57335e-12	1.86494e-11	8.31545e-11	2.23683e-10	4.69857e-10	9.23034e-10	1.52178e-09	-1.79148e-10	-2.93315e-10	-3.47184e-10	-3.08748e-11	8.81206e-10	2.39676e-09	4.50617e-09	7.08694e-09	1.00559e-08
0.130787	-4.39024e-11	-2.03429e-11	-7.03006e-12	2.01926e-11	8.77844e-11	2.31399e-10	4.86833e-10	9.12231e-10	1.51869e-09	-1.8818e-10	-3.02402e-10	-3.42691e-10	-3.23908e-11	8.79672e-10	2.40135e-09	4.49574e-09	7.11271e-09	1.00454e-08
0.131037	-4.69889e-11	-2.34295e-11	-7.03006e-12	2.17359e-11	8.62411e-11	2.23683e-10	4.79116e-10	9.12231e-10	1.51561e-09	-1.8061e-10	-2.9789e-10	-3.51759e-10	-3.09112e-11	8.78183e-10	2.406e-09	4.51091e-09	7.09155e-09	1.00606e-08
0.131287	-5.00755e-11	-2.6516e-11	-1.7833e-11	1.86494e-11	8.62411e-11	2.23683e-10	4.8066e-10	9.18404e-10	1.51561e-09	-1.80591e-10	-2.99352e-10	-3.427e-10	-3.6966e-11	8.8579e-10	2.41359e-09	4.50789e-09	7.0975e-09	1.00668e-08
0.131537	-5.16188e-11	-2.6516e-11	-8.57335e-12	1.71061e-11	8.93277e-11	2.19053e-10	4.77573e-10	9.2612e-10	1.53104e-09	-1.85167e-10	-2.93297e-10	-3.487e-10	-3.08566e-11	8.84283e-10	2.40298e-09	4.49726e-09	7.09299e-09	1.00592e-08
0.131787	-5.47053e-11	-1.72563e-11	-1.16599e-11	2.17359e-11	8.46978e-11	2.22139e-10	4.83746e-10	9.12231e-10	1.52487e-09	-1.85212e-10	-2.99388e-10	-3.41157e-10	-2.32675e-11	8.7969e-10	2.40747e-09	4.50784e-09	7.09752e-09	1.00653e-08
0.132037	-4.85322e-11	-2.96026e-11	-7.03006e-12	2.32792e-11	8.77844e-11	2.23683e-10	4.74487e-10	9.21491e-10	1.52332e-09	-1.88244e-10	-3.03918e-10	-3.48727e-10	-3.54409e-11	8.78201e-10	2.40296e-09	4.50339e-09	7.09602e-09	1.00653e-08
0.132287	-4.85322e-11	-2.80593e-11	-1.7833e-11	1.24762e-11	7.54381e-11	2.28313e-10	4.79116e-10	9.16861e-10	1.5295e-09	-1.8523e-10	-2.90265e-10	-3.47212e-10	-3.84729e-11	8.8884e-10	2.40898e-09	4.51409e-09	7.09452e-09	1.00714e-08
0.132537	-3.92725e-11	-2.96026e-11	-1.32032e-11	2.01926e-11	8.16113e-11	2.25226e-10	4.8066e-10	9.13774e-10	1.51715e-09	-1.88244e-10	-2.97763e-10	-3.4112e-10	-2.32857e-11	8.84301e-10	2.40146e-09	4.52174e-09	7.10063e-09	1.00654e-08
0.132787	-5.00755e-11	-2.03429e-11	-7.03006e-12	1.24762e-11	8.0068e-11	2.25226e-10	4.79116e-10	9.23034e-10	1.52795e-09	-1.85212e-10	-2.90201e-10	-3.4417e-10	-3.08293e-11	8.79735e-10	2.41209e-09	4.51567e-09	7.10377e-09	1.00822e-08
0.133037	-4.54456e-11	-1.87996e-11	-2.09196e-11	1.71061e-11	9.0871e-11	2.1751e-10	4.8066e-10	9.3075e-10	1.52024e-09	-1.85176e-10	-2.93233e-10	-3.50253e-10	-3.23817e-11	8.85799e-10	2.41217e-09	4.51263e-09	7.11288e-09	1.00839e-08
0.133287	-4.54456e-11	-1.57131e-11	-1.32032e-11	1.55628e-11	8.93277e-11	2.19053e-10	4.83746e-10	9.18404e-10	1.52795e-09	-1.82135e-10	-2.97863e-10	-3.44189e-10	-2.9377e-11	8.84283e-10	2.41523e-09	4.52174e-09	7.10389e-09	1.00914e-08
0.133537	-5.00755e-11	-1.10832e-11	-1.93763e-11	1.86494e-11	8.16113e-11	2.22139e-10	4.82203e-10	9.24577e-10	1.53413e-09	-1.83642e-10	-3.03945e-10	-3.44207e-10	-3.53681e-11	8.79753e-10	2.41675e-09	4.51723e-09	7.12056e-09	1.00854e-08
0.133787	-5.77919e-11	-2.80593e-11	-1.16599e-11	1.40195e-11	8.77844e-11	2.22139e-10	4.72943e-10	9.19947e-10	1.53567e-09	-1.8366e-10	-2.96329e-10	-3.53312e-10	-2.0181e-11	8.88959e-10	2.41215e-09	4.51874e-09	7.11156e-09	1.009e-08
0.134037	-4.54456e-11	-2.49728e-11	-1.01166e-11	1.71061e-11	8.31545e-11	2.19053e-10	4.82203e-10	9.21491e-10	1.53413e-09	-1.85212e-10	-2.91735e-10	-3.4575e-10	-2.46652e-11	9.02548e-10	2.40756e-09	4.52178e-09	7.12068e-09	1.00946e-08
0.134288	-4.69889e-11	-1.87996e-11	-2.40021e-12	2.48225e-11	8.46978e-11	2.20596e-10	4.7603e-10	9.29207e-10	1.53876e-09	-1.89815e-10	-2.96301e-10	-3.47221e-10	-2.47016e-11	8.70712e-10	2.40908e-09	4.51883e-09	7.12527e-09	1.00977e-08
0.134538	-5.00755e-11	-1.87996e-11	-1.16599e-11	1.24762e-11	8.46978e-11	2.15966e-10	4.74487e-10	9.27664e-10	1.53567e-09	-1.92938e-10	-2.99379e-10	-3.45659e-10	-2.6254e-11	8.88868e-10	2.4137e-09	4.53096e-09	7.11771e-09	1.01008e-08
0.134788	-5.16188e-11	-2.34295e-11	-1.32032e-11	1.71061e-11	8.31545e-11	2.19053e-10	4.7603e-10	9.32293e-10	1.52795e-09	-2.00572e-10	-2.99388e-10	-3.38106e-10	-3.08748e-11	8.96493e-10	2.41824e-09	4.52345e-09	7.12529e-09	1.01115e-08
0.135038	-4.08158e-11	-2.80593e-11	-1.01166e-11	1.55628e-11	7.54381e-11	2.26769e-10	4.86833e-10	9.32293e-10	1.53721e-09	-1.99029e-10	-2.97772e-10	-3.51759e-10	-3.69387e-11	8.78228e-10	2.40925e-09	4.53105e-09	7.12386e-09	1.00995e-08
0.135288	-4.85322e-11	-2.18862e-11	-1.32032e-11	2.01926e-11	7.38949e-11	2.28313e-10	4.8066e-10	9.3075e-10	1.53413e-09	-1.88417e-10	-2.82657e-10	-3.47221e-10	-2.62995e-11	8.7664e-10	2.43047e-09	4.53419e-09	7.13304e-09	1.01253e-08
0.135538	-5.00755e-11	-1.87996e-11	-8.57335e-12	2.01926e-11	7.69814e-11	2.20596e-10	4.82203e-10	9.27664e-10	1.53876e-09	-2.0049e-10	-3.06931e-10	-3.39604e-10	-2.62722e-11	8.84247e-10	2.41843e-09	4.54026e-09	7.13921e-09	1.01178e-08
0.135788	-4.39024e-11	-1.41698e-11	-1.32032e-11	1.40195e-11	8.46978e-11	2.26769e-10	4.8066e-10	9.21491e-10	1.53413e-09	-1.89869e-10	-3.00922e-10	-3.45641e-10	-3.23817e-11	8.82749e-10	2.4229e-09	4.53262e-09	7.14229e-09	1.01162e-08
0.136038	-5.31621e-11	-1.41698e-11	-5.48678e-12	2.32792e-11	7.85247e-11	2.23683e-10	4.8066e-10	9.12231e-10	1.54184e-09	-1.86765e-10	-2.91753e-10	-3.42627e-10	-3.38976e-11	8.7969e-10	2.41836e-09	4.525e-09	7.14085e-09	1.01148e-08
0.136288	-5.93352e-11	-2.80593e-11	-1.16599e-11	1.40195e-11	8.0068e-11	2.20596e-10	4.74487e-10	9.24577e-10	1.5403e-09	-1.88326e-10	-2.94703e-10	-3.42636e-10	-2.63359e-11	8.79708e-10	2.41982e-09	4.53256e-09	7.15297e-09	1.01254e-08
0.136538	-4.08158e-11	-1.87996e-11	-3.9435e-12	1.71061e-11	7.85247e-11	2.22139e-10	4.82203e-10	9.2612e-10	1.54339e-09	-1.97458e-10	-2.87142e-10	-3.47193e-10	-3.54864e-11	8.85781e-10	2.41374e-09	4.5296e-09	7.14087e-09	1.01255e-08
0.136788	-5.47053e-11	-2.34295e-11	-5.48678e-12	2.01926e-11	8.62411e-11	2.23683e-10	4.83746e-10	9.27664e-10	1.53413e-09	-1.92947e-10	-2.94767e-10	-3.44143e-10	-4.30573e-11	8.81269e-10	2.41531e-09	4.53719e-09	7.14545e-09	1.0127e-08
0.137038	-4.54456e-11	-2.18862e-11	-1.93763e-11	2.17359e-11	8.46978e-11	2.23683e-10	4.79116e-10	9.21491e-10	1.5511e-09	-1.94381e-10	-3.02411e-10	-3.39559e-10	-2.48654e-11	8.8579e-10	2.42899e-09	4.5342e-09	7.1577e-09	1.01286e-08
0.137288	-5.31621e-11	-2.18862e-11	-8.57335e-12	1.55628e-11	8.31545e-11	2.23683e-10	4.8066e-10	9.2612e-10	1.5511e-09	-1.83842e-10	-2.97936e-10	-3.41129e-10	-3.54591e-11	8.81279e-10	2.41993e-09	4.53726e-09	7.16235e-09	1.01347e-08
0.137538	-4.69889e-11	-2.80593e-11	-1.01166e-11	1.71061e-11	8.46978e-11	2.22139e-10	4.79116e-10	9.3075e-10	1.54184e-09	-2.05057e-10	-3.06977e-10	-3.53257e-10	-4.0089e-11	8.87352e-10	2.4214e-09	4.54185e-09	7.16229e-09	1.01394e-08
0.137788	-4.69889e-11	-2.18862e-11	-1.32032e-11	1.55628e-11	9.55008e-11	2.23683e-10	4.83746e-10	9.33837e-10	1.53876e-09	-1.93029e-10	-2.93306e-10	-3.39641e-10	-3.85548e-11	8.87352e-10	2.42141e-09	4.54031e-09	7.14708e-09	1.01486e-08
0.138039	-4.54456e-11	-2.34295e-11	-8.57335e-12	1.40195e-11	8.93277e-11	2.36029e-10	4.96093e-10	9.32293e-10	1.5511e-09	-2.00472e-10	-2.93278e-10	-3.4565e-10	-3.24363e-11	8.81297e-10	2.42141e-09	4.53427e-09	7.15469e-09	1.01472e-08
0.138289	-4.39024e-11	-2.18862e-11	-7.03006e-12	1.71061e-11	7.38949e-11	2.23683e-10	4.83746e-10	9.21491e-10	1.5295e-09	-1.82289e-10	-3.02438e-10	-3.44152e-10	-3.09294e-11	8.88849e-10	2.42139e-09	4.54488e-09	7.16689e-09	1.01593e-08
0.138539	-4.23591e-11	-1.57131e-11	-1.62898e-11	1.40195e-11	7.85247e-11	2.28313e-10	4.89919e-10	9.24577e-10	1.54647e-09	-1.94326e-10	-3.03972e-10	-3.42573e-10	-4.00435e-11	8.82758e-10	2.4183e-09	4.54035e-09	7.15941e-09	1.01549e-08
0.138789	-4.69889e-11	-2.80593e-11	-3.9435e-12	1.40195e-11	8.46978e-11	2.32942e-10	4.79116e-10	9.21491e-10	1.53876e-09	-1.85249e-10	-2.96411e-10	-3.34984e-10	-3.54682e-11	8.76712e-10	2.41075e-09	4.53731e-09	7.17166e-09	1.01624e-08
0.139039	-4.85322e-11	-2.6516e-11	-1.01166e-11	1.24762e-11	8.62411e-11	2.25226e-10	4.77573e-10	9.19947e-10	1.53876e-09	-1.85221e-10	-3.05443e-10	-3.42554e-10	-2.63268e-11	8.91918e-10	2.42595e-09	4.5434e-09	7.18689e-09	1.01549e-08
0.139289	-3.92725e-11	-2.6516e-11	-1.47465e-11	1.71061e-11	8.77844e-11	2.28313e-10	4.97636e-10	9.29207e-10	1.54184e-09	-1.89824e-10	-2.93351e-10	-3.41093e-10	-3.2409e-11	8.90493e-10	2.42605e-09	4.54501e-09	7.17174e-09	1.01579e-08
0.139539	-5.00755e-11	-3.11459e-11	-8.57335e-12	2.79091e-11	8.77844e-11	2.22139e-10	4.82203e-10	9.19947e-10	1.53567e-09	-1.94408e-10	-3.02411e-10	-3.44089e-10	-3.85093e-11	8.92045e-10	2.42754e-09	4.55262e-09	7.17321e-09	1.01671e-08
0.139789	-4.85322e-11	-2.03429e-11	-1.32032e-11	6.30309e-12	7.23516e-11	2.32942e-10	4.86833e-10	9.2612e-10	1.5403e-09	-1.91404e-10	-2.99452e-10	-3.36527e-10	-3.23726e-11	8.98146e-10	2.42151e-09	4.54963e-09	7.17931e-09	1.01702e-08
0.140039	-4.69889e-11	-2.80593e-11	-1.01166e-11	1.71061e-11	8.62411e-11	2.26769e-10	4.8529e-10	9.19947e-10	1.53876e-09	-1.94399e-10	-3.05497e-10	-3.44116e-10	-2.01992e-11	8.9662e-10	2.43211e-09	4.55116e-09	7.17789e-09	1.01672e-08
0.140289	-4.23591e-11	-1.72563e-11	-1.16599e-11	1.71061e-11	9.0871e-11	2.25226e-10	4.86833e-10	9.32293e-10	1.54184e-09	-1.88353e-10	-2.9947e-10	-3.45659e-10	-3.08475e-11	8.90502e-10	2.42461e-09	4.55576e-09	7.19006e-09	1.01779e-08
0.140539	-4.85322e-11	-2.03429e-11	-5.48678e-12	1.55628e-11	8.46978e-11	2.31399e-10	4.96093e-10	9.12231e-10	1.54184e-09	-1.94372e-10	-3.05479e-10	-3.41075e-10	-3.84911e-11	8.8894e-10	2.43525e-09	4.5588e-09	7.1855e-09	1.01796e-08
0.140789	-4.69889e-11	-3.42325e-11	-1.47465e-11	1.71061e-11	8.77844e-11	2.26769e-10	4.83746e-10	9.27664e-10	1.54339e-09	-1.86783e-10	-2.96374e-10	-3.38006e-10	-3.09567e-11	8.88977e-10	2.4368e-09	4.5527e-09	7.17638e-09	1.01993e-08
0.141039	-4.69889e-11	-2.6516e-11	-7.03006e-12	1.55628e-11	7.38949e-11	2.25226e-10	4.8529e-10	9.33837e-10	1.53567e-09	-1.86719e-10	-2.9789e-10	-3.39504e-10	-3.85002e-11	8.96611e-10	2.4308e-09	4.54964e-09	7.18551e-09	1.01812e-08
0.141289	-3.92725e-11	-2.96026e-11	-1.01166e-11	2.01926e-11	8.0068e-11	2.25226e-10	4.89919e-10	9.3075e-10	1.54339e-09	-1.83724e-10	-3.05434e-10	-3.38015e-10	-3.24726e-11	8.98109e-10	2.44596e-09	4.55277e-09	7.19171e-09	1.01842e-08
0.14154	-4.69889e-11	-2.96026e-11	-1.32032e-11	1.71061e-11	8.31545e-11	2.22139e-10	4.86833e-10	9.19947e-10	1.54956e-09	-1.92829e-10	-2.9031e-10	-3.42536e-10	-3.6966e-11	8.85945e-10	2.43689e-09	4.5695e-09	7.19934e-09	1.01949e-08
0.14179	-4.39024e-11	-2.34295e-11	-8.57335e-12	1.40195e-11	8.31545e-11	2.23683e-10	4.89919e-10	9.23034e-10	1.54647e-09	-1.88281e-10	-3.03881e-10	-3.35011e-10	-2.94134e-11	8.90465e-10	2.4353e-09	4.55893e-09	7.19332e-09	1.0201e-08
0.14204	-4.23591e-11	-2.80593e-11	-1.16599e-11	1.71061e-11	7.85247e-11	2.28313e-10	4.89919e-10	9.21491e-10	1.55419e-09	-1.83678e-10	-2.93342e-10	-3.47102e-10	-3.69842e-11	8.9357e-10	2.43379e-09	4.5604e-09	7.19942e-09	1.0195e-08
0.14229	-4.23591e-11	-3.26892e-11	-1.01166e-11	1.55628e-11	9.0871e-11	2.22139e-10	4.88376e-10	9.19947e-10	1.5511e-09	-1.83696e-10	-3.02383e-10	-3.36499e-10	-3.54864e-11	8.98073e-10	2.43834e-09	4.5619e-09	7.20555e-09	1.01935e-08
0.14254	-4.54456e-11	-2.03429e-11	-1.47465e-11	1.55628e-11	8.31545e-11	2.23683e-10	4.88376e-10	9.23034e-10	1.53413e-09	-1.91313e-10	-2.94867e-10	-3.36509e-10	-3.24272e-11	8.82876e-10	2.43537e-09	4.55597e-09	7.2041e-09	1.02118e-08
0.14279	-5.16188e-11	-2.96026e-11	-8.57335e-12	2.01926e-11	8.46978e-11	2.23683e-10	4.94549e-10	9.2612e-10	1.55264e-09	-1.89833e-10	-3.03936e-10	-3.48627e-10	-3.24453e-11	8.87352e-10	2.44294e-09	4.58337e-09	7.21169e-09	1.02043e-08
0.14304	-4.08158e-11	-2.34295e-11	-1.32032e-11	2.01926e-11	8.77844e-11	2.26769e-10	4.94549e-10	9.36923e-10	1.5511e-09	-1.89851e-10	-2.97917e-10	-3.34974e-10	-3.85093e-11	8.85845e-10	2.43841e-09	4.58056e-09	7.20722e-09	1.02195e-08
0.14329	-5.00755e-11	-2.80593e-11	-8.57335e-12	2.48225e-11	8.16113e-11	2.29856e-10	4.83746e-10	9.32293e-10	1.56345e-09	-1.94381e-10	-3.0242e-10	-3.34974e-10	-3.24453e-11	8.8432e-10	2.43683e-09	4.59255e-09	7.21627e-09	1.02105e-08
0.14354	-4.39024e-11	-3.11459e-11	-1.32032e-11	1.71061e-11	8.31545e-11	2.34486e-10	4.83746e-10	9.24577e-10	1.54493e-09	-1.8681e-10	-2.96365e-10	-3.48691e-10	-3.23817e-11	8.85845e-10	2.43233e-09	4.56071e-09	7.2042e-09	1.02181e-08
0.14379	-3.77292e-11	-2.80593e-11	-1.32032e-11	1.71061e-11	8.0068e-11	2.23683e-10	4.8066e-10	9.27664e-10	1.55573e-09	-1.91303e-10	-2.99306e-10	-3.47221e-10	-2.78701e-11	8.87379e-10	2.44753e-09	4.58034e-09	7.21791e-09	1.02227e-08
0.14404	-5.00755e-11	-1.87996e-11	-1.32032e-11	1.40195e-11	8.16113e-11	2.26769e-10	4.8529e-10	9.3538e-10	1.55882e-09	-1.85221e-10	-2.87187e-10	-3.42627e-10	-3.84911e-11	8.87461e-10	2.44304e-09	4.57891e-09	7.227e-09	1.02287e-08
0.14429	-4.23591e-11	-2.03429e-11	-1.32032e-11	1.40195e-11	8.93277e-11	2.32942e-10	4.88376e-10	9.23034e-10	1.55573e-09	-1.83678e-10	-2.97817e-10	-3.41047e-10	-3.39431e-11	8.99607e-10	2.44151e-09	4.57589e-09	7.20271e-09	1.0209e-08
0.14454	-5.47053e-11	-2.49728e-11	-1.47465e-11	1.40195e-11	7.85247e-11	2.22139e-10	4.86833e-10	9.36923e-10	1.56036e-09	-1.86683e-10	-3.02411e-10	-3.3649e-10	-2.78428e-11	8.90511e-10	2.44606e-09	4.58197e-09	7.21328e-09	1.02212e-08
0.14479	-4.69889e-11	-2.49728e-11	-8.57335e-12	1.71061e-11	7.69814e-11	2.25226e-10	4.91463e-10	9.2612e-10	1.54647e-09	-1.80601e-10	-2.9484e-10	-3.4102e-10	-3.23544e-11	8.87424e-10	2.44307e-09	4.58201e-09	7.21947e-09	1.02365e-08
0.145041	-4.39024e-11	-2.03429e-11	-1.32032e-11	1.40195e-11	7.85247e-11	2.26769e-10	4.8529e-10	9.2612e-10	1.56653e-09	-1.80637e-10	-2.9937e-10	-3.37988e-10	-2.78701e-11	8.90475e-10	2.44908e-09	4.58203e-09	7.22409e-09	1.02305e-08
0.145291	-4.54456e-11	-2.6516e-11	-1.16599e-11	1.40195e-11	8.16113e-11	2.32942e-10	4.88376e-10	9.3075e-10	1.5619e-09	-1.92838e-10	-2.99352e-10	-3.36472e-10	-3.85184e-11	8.93516e-10	2.43703e-09	4.58508e-09	7.22563e-09	1.02412e-08
0.145541	-5.31621e-11	-2.34295e-11	-1.47465e-11	1.40195e-11	8.46978e-11	2.25226e-10	4.89919e-10	9.32293e-10	1.55419e-09	-1.92901e-10	-2.91762e-10	-3.41029e-10	-3.85184e-11	8.89004e-10	2.45524e-09	4.58516e-09	7.22258e-09	1.02397e-08
0.145791	-5.00755e-11	-1.72563e-11	-1.47465e-11	1.09329e-11	7.69814e-11	2.26769e-10	4.8529e-10	9.3075e-10	1.56808e-09	-1.91349e-10	-2.97817e-10	-3.39541e-10	-2.78428e-11	8.96575e-10	2.45227e-09	4.59578e-09	7.22111e-09	1.02442e-08
0.146041	-3.92725e-11	-1.87996e-11	-1.01166e-11	1.40195e-11	8.46978e-11	2.22139e-10	4.82203e-10	9.23034e-10	1.5619e-09	-1.86755e-10	-2.97836e-10	-3.41057e-10	-2.78337e-11	8.92018e-10	2.44769e-09	4.58671e-09	7.23331e-09	1.02367e-08
0.146291	-4.23591e-11	-2.49728e-11	-7.03006e-12	1.24762e-11	8.46978e-11	2.26769e-10	4.88376e-10	9.32293e-10	1.56499e-09	-1.85221e-10	-2.94822e-10	-3.41084e-10	-3.69023e-11	8.87415e-10	2.45068e-09	4.58973e-09	7.23495e-09	1.02534e-08
0.146541	-3.77292e-11	-2.6516e-11	-1.47465e-11	1.71061e-11	8.31545e-11	2.22139e-10	4.86833e-10	9.3075e-10	1.5619e-09	-1.88281e-10	-3.00904e-10	-3.44089e-10	-2.33221e-11	8.87424e-10	2.44463e-09	4.59432e-09	7.24248e-09	1.02475e-08
0.146791	-4.85322e-11	-2.6516e-11	-1.16599e-11	1.40195e-11	8.0068e-11	2.26769e-10	4.89919e-10	9.32293e-10	1.5511e-09	-1.91358e-10	-3.00931e-10	-3.3649e-10	-3.84911e-11	8.93543e-10	2.45069e-09	4.59278e-09	7.22425e-09	1.02551e-08
0.147041	-3.46427e-11	-2.6516e-11	-1.16599e-11	2.17359e-11	8.46978e-11	2.36029e-10	4.91463e-10	9.21491e-10	1.56962e-09	-1.92883e-10	-2.99406e-10	-3.37952e-10	-3.85457e-11	8.96611e-10	2.44925e-09	4.5852e-09	7.22872e-09	1.02551e-08
0.147291	-4.54456e-11	-2.34295e-11	-7.03006e-12	1.24762e-11	7.08083e-11	2.28313e-10	4.8529e-10	9.4464e-10	1.56653e-09	-1.8986e-10	-2.99424e-10	-3.34929e-10	-3.24908e-11	8.93552e-10	2.45681e-09	4.59584e-09	7.23032e-09	1.02598e-08
0.147541	-4.39024e-11	-2.03429e-11	-1.47465e-11	1.71061e-11	8.31545e-11	2.25226e-10	4.91463e-10	9.33837e-10	1.56808e-09	-1.92856e-10	-3.03927e-10	-3.37961e-10	-3.9998e-11	8.8895e-10	2.44775e-09	4.59737e-09	7.23795e-09	1.02674e-08
0.147791	-4.08158e-11	-2.80593e-11	-1.01166e-11	1.24762e-11	8.31545e-11	2.29856e-10	4.91463e-10	9.27664e-10	1.56345e-09	-1.86746e-10	-2.9179e-10	-3.37979e-10	-2.63541e-11	8.87361e-10	2.45532e-09	4.58677e-09	7.23801e-09	1.0266e-08
0.148041	-5.31621e-11	-2.6516e-11	-1.16599e-11	1.09329e-11	8.0068e-11	2.25226e-10	4.89919e-10	9.41553e-10	1.56499e-09	-1.82153e-10	-2.97772e-10	-3.37934e-10	-3.23635e-11	8.81297e-10	2.45539e-09	4.5989e-09	7.2395e-09	1.02706e-08
0.148291	-4.54456e-11	-1.87996e-11	-1.32032e-11	9.38966e-12	8.0068e-11	2.29856e-10	4.91463e-10	9.4927e-10	1.5619e-09	-1.8523e-10	-2.90183e-10	-3.30372e-10	-3.09112e-11	8.88895e-10	2.45993e-09	4.59739e-09	7.23344e-09	1.02782e-08
0.148541	-4.08158e-11	-2.80593e-11	-1.01166e-11	2.01926e-11	8.0068e-11	2.31399e-10	4.94549e-10	9.32293e-10	1.55419e-09	-1.94381e-10	-2.90192e-10	-3.40975e-10	-3.69842e-11	8.9052e-10	2.45388e-09	4.58675e-09	7.23955e-09	1.02798e-08
0.148792	-4.69889e-11	-3.57757e-11	-1.62898e-11	2.01926e-11	8.16113e-11	2.25226e-10	4.8529e-10	9.38467e-10	1.56345e-09	-1.91331e-10	-2.99342e-10	-3.36463e-10	-3.40068e-11	8.99662e-10	2.45688e-09	4.59434e-09	7.24714e-09	1.0286e-08
0.149042	-4.54456e-11	-2.80593e-11	-3.9435e-12	1.55628e-11	8.31545e-11	2.26769e-10	4.94549e-10	9.38467e-10	1.56962e-09	-1.82208e-10	-2.99379e-10	-3.36409e-10	-4.00253e-11	8.96666e-10	2.45537e-09	4.59892e-09	7.23504e-09	1.02906e-08
0.149292	-5.77919e-11	-2.6516e-11	-1.47465e-11	9.38966e-12	8.62411e-11	2.32942e-10	4.91463e-10	9.4001e-10	1.56499e-09	-1.89733e-10	-2.96301e-10	-3.31833e-10	-2.9377e-11	8.96593e-10	2.45544e-09	4.59295e-09	7.24413e-09	1.02891e-08
0.149542	-4.39024e-11	-2.6516e-11	-7.03006e-12	1.55628e-11	8.31545e-11	2.25226e-10	4.8066e-10	9.4464e-10	1.56499e-09	-1.8218e-10	-2.91662e-10	-3.31824e-10	-2.78337e-11	8.87434e-10	2.46765e-09	4.6097e-09	7.24569e-09	1.02968e-08
0.149792	-5.00755e-11	-2.34295e-11	-1.62898e-11	1.71061e-11	9.0871e-11	2.32942e-10	4.89919e-10	9.4927e-10	1.57579e-09	-1.86728e-10	-2.84028e-10	-3.34883e-10	-3.54409e-11	8.85918e-10	2.46921e-09	4.61132e-09	7.24265e-09	1.03029e-08
0.150042	-4.08158e-11	-1.87996e-11	-1.32032e-11	2.01926e-11	8.0068e-11	2.32942e-10	4.89919e-10	9.3538e-10	1.57888e-09	-1.89778e-10	-2.8706e-10	-3.36427e-10	-3.4025e-11	8.96502e-10	2.46309e-09	4.61135e-09	7.24271e-09	1.03028e-08
0.150292	-4.23591e-11	-2.80593e-11	-3.9435e-12	2.01926e-11	6.9265e-11	2.20596e-10	4.99179e-10	9.4927e-10	1.55264e-09	-1.85167e-10	-2.91662e-10	-3.36463e-10	-4.46551e-11	8.82904e-10	2.45843e-09	4.61434e-09	7.25642e-09	1.02831e-08
0.150542	-4.39024e-11	-2.18862e-11	-1.32032e-11	2.17359e-11	8.62411e-11	2.32942e-10	4.93006e-10	9.47726e-10	1.57888e-09	-1.75989e-10	-2.93215e-10	-3.41002e-10	-3.86003e-11	8.93543e-10	2.45079e-09	4.6037e-09	7.25348e-09	1.03029e-08
0.150792	-4.69889e-11	-2.18862e-11	-1.47465e-11	1.55628e-11	8.31545e-11	2.28313e-10	4.96093e-10	9.55443e-10	1.57579e-09	-1.75953e-10	-2.93187e-10	-3.34938e-10	-3.5541e-11	9.01177e-10	2.45235e-09	4.60669e-09	7.258e-09	1.0309e-08
0.151042	-3.46427e-11	-2.49728e-11	-1.32032e-11	1.24762e-11	8.62411e-11	2.25226e-10	4.96093e-10	9.3538e-10	1.5619e-09	-1.79012e-10	-2.87105e-10	-3.36399e-10	-4.00799e-11	8.92036e-10	2.46609e-09	4.60831e-09	7.25204e-09	1.02954e-08
0.151292	-4.85322e-11	-2.03429e-11	-7.03006e-12	1.71061e-11	7.85247e-11	2.31399e-10	4.96093e-10	9.47726e-10	1.58505e-09	-1.80619e-10	-2.90128e-10	-3.31842e-10	-3.7057e-11	8.8589e-10	2.46611e-09	4.62049e-09	7.27172e-09	1.02999e-08
0.151542	-4.23591e-11	-2.34295e-11	-8.57335e-12	1.86494e-11	8.62411e-11	2.1751e-10	4.86833e-10	9.46183e-10	1.57579e-09	-1.91231e-10	-2.91708e-10	-3.33386e-10	-3.69751e-11	8.87443e-10	2.45694e-09	4.61596e-09	7.25365e-09	1.03014e-08
0.151792	-4.39024e-11	-1.87996e-11	-1.16599e-11	2.48225e-11	8.46978e-11	2.23683e-10	4.97636e-10	9.55443e-10	1.57271e-09	-1.79157e-10	-2.97781e-10	-3.41057e-10	-2.63268e-11	8.981e-10	2.45391e-09	4.61142e-09	7.27186e-09	1.02999e-08
0.152042	-4.69889e-11	-2.49728e-11	-1.32032e-11	2.63658e-11	7.08083e-11	2.26769e-10	4.8529e-10	9.4927e-10	1.57425e-09	-1.89724e-10	-2.91735e-10	-3.47102e-10	-3.08748e-11	8.93616e-10	2.46607e-09	4.62207e-09	7.27501e-09	1.03046e-08
0.152293	-5.62486e-11	-2.80593e-11	-1.62898e-11	2.01926e-11	8.46978e-11	2.32942e-10	4.96093e-10	9.50813e-10	1.58351e-09	-1.8366e-10	-2.94767e-10	-3.30417e-10	-3.6966e-11	8.98118e-10	2.46158e-09	4.62213e-09	7.27346e-09	1.03183e-08
0.152543	-5.31621e-11	-2.80593e-11	-1.32032e-11	1.71061e-11	7.69814e-11	2.40659e-10	5.06896e-10	9.4464e-10	1.57271e-09	-1.79048e-10	-2.97854e-10	-3.39413e-10	-3.09476e-11	8.90566e-10	2.46456e-09	4.62057e-09	7.26586e-09	1.03183e-08
0.152793	-4.39024e-11	-2.18862e-11	-8.57335e-12	2.17359e-11	9.24142e-11	2.31399e-10	4.89919e-10	9.4464e-10	1.58042e-09	-1.79021e-10	-3.00931e-10	-3.30363e-10	-3.85275e-11	8.98118e-10	2.45698e-09	4.61597e-09	7.27202e-09	1.03108e-08
0.153043	-4.08158e-11	-2.80593e-11	-1.16599e-11	1.24762e-11	8.16113e-11	2.26769e-10	4.91463e-10	9.4927e-10	1.58197e-09	-1.79021e-10	-3.02438e-10	-3.37961e-10	-3.7057e-11	8.93616e-10	2.46152e-09	4.61295e-09	7.28875e-09	1.03276e-08
0.153293	-4.85322e-11	-2.6516e-11	-1.47465e-11	1.71061e-11	8.62411e-11	2.19053e-10	4.94549e-10	9.58529e-10	1.57116e-09	-1.79057e-10	-2.96301e-10	-3.42591e-10	-3.85639e-11	8.98173e-10	2.46314e-09	4.62215e-09	7.27517e-09	1.03353e-08
0.153543	-4.54456e-11	-2.80593e-11	-8.57335e-12	9.38966e-12	7.54381e-11	2.29856e-10	4.94549e-10	9.50813e-10	1.58505e-09	-1.85158e-10	-2.8863e-10	-3.44152e-10	-3.70661e-11	8.99725e-10	2.4738e-09	4.63433e-09	7.28423e-09	1.03307e-08
0.153793	-4.85322e-11	-2.6516e-11	-8.57335e-12	2.01926e-11	7.38949e-11	2.20596e-10	5.09982e-10	9.43096e-10	1.57425e-09	-1.85158e-10	-2.87051e-10	-3.45623e-10	-4.00617e-11	8.99716e-10	2.47074e-09	4.62075e-09	7.28124e-09	1.03156e-08
0.154043	-4.54456e-11	-1.87996e-11	-1.01166e-11	1.71061e-11	8.16113e-11	2.25226e-10	4.91463e-10	9.52356e-10	1.57116e-09	-1.79048e-10	-2.85526e-10	-3.3502e-10	-3.24272e-11	8.96666e-10	2.45858e-09	4.63444e-09	7.28284e-09	1.0352e-08
0.154293	-4.39024e-11	-2.03429e-11	-1.32032e-11	6.30309e-12	8.31545e-11	2.29856e-10	4.99179e-10	9.4927e-10	1.57888e-09	-1.77505e-10	-2.87051e-10	-3.45568e-10	-2.78337e-11	8.96675e-10	2.46766e-09	4.64059e-09	7.29808e-09	1.03263e-08
0.154543	-5.16188e-11	-2.03429e-11	-1.16599e-11	1.40195e-11	7.54381e-11	2.25226e-10	5.02266e-10	9.43096e-10	1.57888e-09	-1.80555e-10	-2.88585e-10	-3.34947e-10	-3.23089e-11	9.01268e-10	2.4693e-09	4.63611e-09	7.2951e-09	1.03246e-08
0.154793	-4.23591e-11	-1.87996e-11	-1.62898e-11	1.86494e-11	8.31545e-11	2.29856e-10	5.05352e-10	9.52356e-10	1.57734e-09	-1.82098e-10	-2.88558e-10	-3.33367e-10	-2.02083e-11	9.04273e-10	2.47842e-09	4.64517e-09	7.29202e-09	1.03261e-08
0.155043	-4.54456e-11	-2.18862e-11	-1.32032e-11	1.24762e-11	8.16113e-11	2.28313e-10	5.00722e-10	9.43096e-10	1.57579e-09	-1.8208e-10	-2.82485e-10	-3.34856e-10	-3.22998e-11	8.92163e-10	2.47241e-09	4.6361e-09	7.29051e-09	1.03338e-08
0.155293	-4.54456e-11	-2.80593e-11	-1.16599e-11	2.01926e-11	9.0871e-11	2.25226e-10	4.96093e-10	9.3538e-10	1.58814e-09	-1.77532e-10	-2.87005e-10	-3.30363e-10	-2.63541e-11	9.04264e-10	2.4785e-09	4.63909e-09	7.29505e-09	1.034e-08
0.155543	-5.00755e-11	-2.18862e-11	-1.32032e-11	1.40195e-11	8.46978e-11	2.29856e-10	4.99179e-10	9.46183e-10	1.58814e-09	-1.82044e-10	-2.8401e-10	-3.42427e-10	-3.9998e-11	8.99752e-10	2.48156e-09	4.63912e-09	7.29056e-09	1.03416e-08
0.155794	-4.23591e-11	-2.49728e-11	-1.01166e-11	1.55628e-11	8.46978e-11	2.23683e-10	5.02266e-10	9.4464e-10	1.56808e-09	-1.75943e-10	-2.88549e-10	-3.24417e-10	-3.2509e-11	8.98218e-10	2.47857e-09	4.64064e-09	7.30125e-09	1.03446e-08
0.156044	-5.00755e-11	-2.80593e-11	-1.47465e-11	1.09329e-11	7.23516e-11	2.29856e-10	5.06896e-10	9.41553e-10	1.5866e-09	-1.71423e-10	-2.85517e-10	-3.60773e-10	-4.15777e-11	9.0125e-10	2.4846e-09	4.64062e-09	7.30738e-09	1.03477e-08
0.156294	-5.00755e-11	-2.80593e-11	-8.57335e-12	1.24762e-11	8.16113e-11	2.28313e-10	4.91463e-10	9.55443e-10	1.57579e-09	-1.86574e-10	-2.84001e-10	-3.38134e-10	-3.55228e-11	8.99743e-10	2.47549e-09	4.63461e-09	7.30287e-09	1.03463e-08
0.156544	-4.39024e-11	-2.96026e-11	-1.7833e-11	1.86494e-11	8.62411e-11	2.25226e-10	4.91463e-10	9.41553e-10	1.57579e-09	-1.74446e-10	-2.88558e-10	-3.4102e-10	-3.39613e-11	8.99716e-10	2.47696e-09	4.64979e-09	7.3074e-09	1.0363e-08
0.156794	-3.77292e-11	-2.96026e-11	-8.57335e-12	1.55628e-11	8.16113e-11	2.28313e-10	4.99179e-10	9.52356e-10	1.57116e-09	-1.71341e-10	-2.87105e-10	-3.36454e-10	-3.3934e-11	8.96684e-10	2.47699e-09	4.64381e-09	7.30436e-09	1.03617e-08
0.157044	-4.39024e-11	-2.18862e-11	-1.47465e-11	1.55628e-11	7.69814e-11	2.34486e-10	4.93006e-10	9.4927e-10	1.57116e-09	-1.74373e-10	-2.94667e-10	-3.34938e-10	-3.09021e-11	8.99743e-10	2.48003e-09	4.64984e-09	7.3014e-09	1.03769e-08
0.157294	-5.00755e-11	-1.87996e-11	-1.93763e-11	2.01926e-11	7.54381e-11	2.28313e-10	4.97636e-10	9.41553e-10	1.57734e-09	-1.74418e-10	-2.85589e-10	-3.41011e-10	-3.39704e-11	9.04319e-10	2.47854e-09	4.64384e-09	7.31956e-09	1.03739e-08
0.157544	-4.54456e-11	-2.80593e-11	-1.01166e-11	1.55628e-11	8.0068e-11	2.29856e-10	4.96093e-10	9.4927e-10	1.57425e-09	-1.7903e-10	-2.90101e-10	-3.38034e-10	-4.00162e-11	9.01278e-10	2.48161e-09	4.65449e-09	7.2984e-09	1.03694e-08
0.157794	-4.23591e-11	-2.49728e-11	-1.7833e-11	1.24762e-11	8.31545e-11	2.25226e-10	4.91463e-10	9.539e-10	1.57888e-09	-1.85176e-10	-2.88576e-10	-3.44061e-10	-2.79156e-11	8.98191e-10	2.48615e-09	4.65605e-09	7.31197e-09	1.0377e-08
0.158044	-4.69889e-11	-3.26892e-11	-1.01166e-11	1.24762e-11	7.38949e-11	2.31399e-10	4.97636e-10	9.4927e-10	1.58814e-09	-1.88253e-10	-2.8401e-10	-3.34974e-10	-3.85093e-11	8.95177e-10	2.47702e-09	4.65153e-09	7.30751e-09	1.03755e-08
0.158294	-4.54456e-11	-2.80593e-11	-7.03006e-12	1.40195e-11	8.31545e-11	2.1751e-10	4.94549e-10	9.4464e-10	1.58197e-09	-1.86737e-10	-2.87014e-10	-3.39441e-10	-3.70479e-11	9.04255e-10	2.47699e-09	4.65915e-09	7.31358e-09	1.03816e-08
0.158544	-4.69889e-11	-2.49728e-11	-8.57335e-12	1.55628e-11	8.93277e-11	2.26769e-10	5.03809e-10	9.60073e-10	1.58042e-09	-1.85158e-10	-2.83973e-10	-3.3029e-10	-3.70297e-11	8.95214e-10	2.48e-09	4.66374e-09	7.3121e-09	1.03832e-08
0.158794	-4.23591e-11	-2.96026e-11	-1.01166e-11	9.38966e-12	8.16113e-11	2.28313e-10	5.03809e-10	9.50813e-10	1.57579e-09	-1.77569e-10	-2.82485e-10	-3.2576e-10	-3.54955e-11	9.04273e-10	2.47395e-09	4.6577e-09	7.31514e-09	1.03879e-08
0.159044	-5.31621e-11	-3.11459e-11	-1.01166e-11	1.24762e-11	7.85247e-11	2.25226e-10	4.91463e-10	9.52356e-10	1.57888e-09	-1.85094e-10	-2.91608e-10	-3.42454e-10	-3.39522e-11	8.98218e-10	2.47849e-09	4.66375e-09	7.31363e-09	1.03985e-08
0.159294	-4.69889e-11	-2.34295e-11	-1.01166e-11	1.09329e-11	8.93277e-11	2.1751e-10	5.05352e-10	9.56986e-10	1.58814e-09	-1.76034e-10	-2.88612e-10	-3.33413e-10	-3.2409e-11	8.96684e-10	2.47849e-09	4.66077e-09	7.3137e-09	1.03926e-08
0.159545	-5.16188e-11	-2.49728e-11	-1.7833e-11	1.24762e-11	8.16113e-11	2.28313e-10	5.03809e-10	9.47726e-10	1.59431e-09	-1.83523e-10	-2.88621e-10	-3.34911e-10	-3.09112e-11	9.01314e-10	2.47397e-09	4.66686e-09	7.32733e-09	1.04032e-08
0.159795	-4.85322e-11	-2.96026e-11	-5.48678e-12	1.86494e-11	8.16113e-11	2.23683e-10	5.09982e-10	9.47726e-10	1.59277e-09	-1.69925e-10	-2.93124e-10	-3.39541e-10	-3.69569e-11	9.11917e-10	2.48462e-09	4.66841e-09	7.3107e-09	1.04017e-08
0.160045	-4.69889e-11	-2.6516e-11	-2.40021e-12	2.01926e-11	8.16113e-11	2.26769e-10	5.09982e-10	9.52356e-10	1.58968e-09	-1.83532e-10	-2.81005e-10	-3.47084e-10	-2.94225e-11	8.95241e-10	2.48472e-09	4.66534e-09	7.32127e-09	1.03986e-08
0.160295	-3.77292e-11	-2.80593e-11	-1.32032e-11	2.32792e-11	8.46978e-11	2.29856e-10	4.97636e-10	9.539e-10	1.60203e-09	-1.77487e-10	-2.90055e-10	-3.28874e-10	-3.84729e-11	9.01241e-10	2.49074e-09	4.6608e-09	7.32136e-09	1.03941e-08
0.160545	-5.31621e-11	-2.6516e-11	-1.01166e-11	2.48225e-11	7.85247e-11	2.31399e-10	5.00722e-10	9.46183e-10	1.59586e-09	-1.72939e-10	-2.85544e-10	-3.36409e-10	-2.94043e-11	9.0125e-10	2.4771e-09	4.66995e-09	7.32444e-09	1.04109e-08
0.160795	-5.00755e-11	-2.96026e-11	-5.48678e-12	1.55628e-11	8.31545e-11	2.29856e-10	4.97636e-10	9.43096e-10	1.59586e-09	-1.83514e-10	-2.87042e-10	-3.39495e-10	-3.3834e-11	8.96648e-10	2.4847e-09	4.67459e-09	7.33054e-09	1.04064e-08
0.161045	-3.77292e-11	-2.80593e-11	-1.32032e-11	1.55628e-11	7.85247e-11	2.26769e-10	5.03809e-10	9.58529e-10	1.5974e-09	-1.71432e-10	-2.87069e-10	-3.38015e-10	-1.8665e-11	8.92091e-10	2.49535e-09	4.67609e-09	7.32757e-09	1.0411e-08
0.161295	-5.16188e-11	-2.18862e-11	-7.03006e-12	1.24762e-11	8.31545e-11	2.26769e-10	4.97636e-10	9.58529e-10	1.59894e-09	-1.80464e-10	-2.90137e-10	-3.42518e-10	-2.77518e-11	8.99689e-10	2.48325e-09	4.66699e-09	7.33523e-09	1.04202e-08
0.161545	-4.69889e-11	-3.26892e-11	-1.16599e-11	2.32792e-11	8.0068e-11	2.32942e-10	4.96093e-10	9.539e-10	1.5974e-09	-1.72984e-10	-2.9316e-10	-3.31897e-10	-3.24272e-11	8.99734e-10	2.48925e-09	4.67458e-09	7.34286e-09	1.04203e-08
0.161795	-4.69889e-11	-3.11459e-11	-7.03006e-12	1.86494e-11	8.16113e-11	2.31399e-10	4.96093e-10	9.4927e-10	1.59277e-09	-1.88117e-10	-2.85544e-10	-3.36399e-10	-4.00162e-11	8.99725e-10	2.48476e-09	4.67768e-09	7.33678e-09	1.04203e-08
0.162045	-4.39024e-11	-3.11459e-11	-1.32032e-11	1.09329e-11	7.85247e-11	2.29856e-10	5.06896e-10	9.4927e-10	1.58968e-09	-1.76007e-10	-2.8401e-10	-3.3492e-10	-2.93679e-11	8.98227e-10	2.49234e-09	4.67918e-09	7.33222e-09	1.04218e-08
0.162295	-4.23591e-11	-2.6516e-11	-1.01166e-11	9.38966e-12	8.46978e-11	2.25226e-10	5.05352e-10	9.50813e-10	1.60203e-09	-1.75953e-10	-2.90128e-10	-3.37961e-10	-2.63541e-11	9.02757e-10	2.48933e-09	4.6716e-09	7.34134e-09	1.04187e-08
0.162545	-5.31621e-11	-3.11459e-11	-7.03006e-12	2.17359e-11	8.16113e-11	2.23683e-10	5.00722e-10	9.41553e-10	1.5866e-09	-1.79003e-10	-2.94676e-10	-3.37988e-10	-4.30846e-11	8.96684e-10	2.48782e-09	4.67763e-09	7.34139e-09	1.04188e-08
0.162795	-4.69889e-11	-1.57131e-11	-5.48678e-12	1.24762e-11	7.85247e-11	2.29856e-10	5.06896e-10	9.539e-10	1.57734e-09	-1.79012e-10	-2.84055e-10	-3.39504e-10	-3.86003e-11	8.96684e-10	2.4939e-09	4.67309e-09	7.33987e-09	1.04295e-08
0.163046	-3.92725e-11	-2.49728e-11	-5.48678e-12	2.63658e-11	8.16113e-11	2.31399e-10	5.03809e-10	9.46183e-10	1.59123e-09	-1.7745e-10	-2.88521e-10	-3.37961e-10	-3.70388e-11	9.02784e-10	2.49239e-09	4.6731e-09	7.33985e-09	1.04326e-08
0.163296	-5.00755e-11	-2.03429e-11	-2.40021e-12	2.01926e-11	8.31545e-11	2.31399e-10	4.99179e-10	9.50813e-10	1.60975e-09	-1.71368e-10	-2.8095e-10	-3.33395e-10	-3.54864e-11	9.02784e-10	2.48933e-09	4.67921e-09	7.33838e-09	1.04387e-08
0.163546	-4.69889e-11	-3.42325e-11	-1.01166e-11	1.55628e-11	8.46978e-11	2.11336e-10	5.00722e-10	9.4927e-10	1.60666e-09	-1.75907e-10	-2.85517e-10	-3.3639e-10	-3.2409e-11	8.96766e-10	2.48783e-09	4.68078e-09	7.34755e-09	1.04372e-08
0.163796	-4.54456e-11	-2.34295e-11	-1.47465e-11	1.86494e-11	8.0068e-11	2.29856e-10	4.96093e-10	9.36923e-10	1.60975e-09	-1.75953e-10	-2.91599e-10	-3.31851e-10	-2.93497e-11	9.10419e-10	2.49548e-09	4.68231e-09	7.35218e-09	1.04357e-08
0.164046	-4.69889e-11	-1.41698e-11	-1.01166e-11	2.63658e-11	8.31545e-11	2.28313e-10	5.05352e-10	9.55443e-10	1.60357e-09	-1.78975e-10	-2.84046e-10	-3.34902e-10	-3.08657e-11	9.04428e-10	2.50154e-09	4.68233e-09	7.35217e-09	1.04418e-08
0.164296	-4.39024e-11	-1.72563e-11	-1.32032e-11	2.17359e-11	8.31545e-11	2.28313e-10	5.03809e-10	9.56986e-10	1.60512e-09	-1.74409e-10	-2.90019e-10	-3.39513e-10	-3.23544e-11	9.08958e-10	2.4879e-09	4.68387e-09	7.34614e-09	1.04465e-08
0.164546	-5.00755e-11	-2.49728e-11	-1.16599e-11	1.86494e-11	8.93277e-11	2.25226e-10	4.97636e-10	9.55443e-10	1.59431e-09	-1.72893e-10	-2.76366e-10	-3.42518e-10	-2.47926e-11	9.07469e-10	2.49546e-09	4.68697e-09	7.3583e-09	1.0448e-08
0.164796	-5.47053e-11	-2.96026e-11	-1.16599e-11	1.86494e-11	8.62411e-11	2.31399e-10	5.02266e-10	9.55443e-10	1.60357e-09	-1.78984e-10	-2.82385e-10	-3.30408e-10	-3.39067e-11	9.09021e-10	2.49851e-09	4.69306e-09	7.35841e-09	1.04405e-08
0.165046	-3.92725e-11	-2.34295e-11	-1.47465e-11	1.86494e-11	8.77844e-11	2.19053e-10	4.97636e-10	9.52356e-10	1.60357e-09	-1.79012e-10	-2.8243e-10	-3.42482e-10	-3.545e-11	9.15094e-10	2.49095e-09	4.68853e-09	7.36444e-09	1.04618e-08
0.165296	-4.69889e-11	-2.80593e-11	-1.16599e-11	1.40195e-11	8.0068e-11	2.26769e-10	5.03809e-10	9.64702e-10	1.60975e-09	-1.77505e-10	-2.83964e-10	-3.33431e-10	-2.93861e-11	9.0904e-10	2.49854e-09	4.69001e-09	7.3524e-09	1.04574e-08
0.165546	-4.54456e-11	-1.87996e-11	-1.01166e-11	2.17359e-11	8.0068e-11	2.32942e-10	5.03809e-10	9.66246e-10	1.59894e-09	-1.805e-10	-2.8548e-10	-3.37915e-10	-3.39795e-11	9.1051e-10	2.50011e-09	4.68695e-09	7.37366e-09	1.04635e-08
0.165796	-5.47053e-11	-2.80593e-11	-8.57335e-12	1.55628e-11	7.85247e-11	2.28313e-10	5.03809e-10	9.58529e-10	1.60357e-09	-1.72884e-10	-2.82485e-10	-3.31879e-10	-4.30391e-11	9.07533e-10	2.50007e-09	4.68393e-09	7.37073e-09	1.04681e-08
0.166046	-4.54456e-11	-2.18862e-11	-2.40021e-12	1.86494e-11	7.69814e-11	2.32942e-10	5.05352e-10	9.4464e-10	1.59894e-09	-1.71405e-10	-2.90037e-10	-3.37906e-10	-2.33312e-11	9.18135e-10	2.49251e-09	4.69155e-09	7.36922e-09	1.04681e-08
0.166296	-3.61859e-11	-2.34295e-11	-1.62898e-11	1.86494e-11	8.62411e-11	2.20596e-10	5.13069e-10	9.58529e-10	1.60049e-09	-1.86583e-10	-2.80941e-10	-3.31906e-10	-3.39158e-11	9.09085e-10	2.50312e-09	4.69307e-09	7.37379e-09	1.04666e-08
0.166547	-5.00755e-11	-3.11459e-11	-1.16599e-11	1.40195e-11	8.46978e-11	2.28313e-10	5.00722e-10	9.539e-10	1.5974e-09	-1.76044e-10	-2.82412e-10	-3.42482e-10	-3.85184e-11	9.15131e-10	2.50012e-09	4.68548e-09	7.37528e-09	1.04742e-08
0.166797	-4.85322e-11	-2.49728e-11	-8.57335e-12	2.01926e-11	9.0871e-11	2.29856e-10	5.02266e-10	9.58529e-10	1.60357e-09	-1.83542e-10	-2.82366e-10	-3.31897e-10	-3.24453e-11	9.15158e-10	2.49713e-09	4.69002e-09	7.36468e-09	1.04759e-08
0.167047	-3.46427e-11	-2.34295e-11	-1.01166e-11	1.86494e-11	8.0068e-11	2.28313e-10	5.13069e-10	9.55443e-10	1.60512e-09	-1.72939e-10	-2.73216e-10	-3.36409e-10	-3.24181e-11	9.13651e-10	2.51079e-09	4.6916e-09	7.37533e-09	1.04912e-08
0.167297	-4.08158e-11	-2.80593e-11	-5.48678e-12	2.48225e-11	8.46978e-11	2.1751e-10	5.03809e-10	9.64702e-10	1.62209e-09	-1.77487e-10	-2.73243e-10	-3.36363e-10	-3.39704e-11	9.16638e-10	2.50329e-09	4.69621e-09	7.38298e-09	1.05049e-08
0.167547	-4.08158e-11	-2.96026e-11	-7.03006e-12	1.09329e-11	8.0068e-11	2.39116e-10	5.02266e-10	9.66246e-10	1.5974e-09	-1.8356e-10	-2.86878e-10	-3.24217e-10	-3.85002e-11	9.07569e-10	2.5093e-09	4.70081e-09	7.37546e-09	1.04837e-08
0.167797	-3.77292e-11	-2.18862e-11	-1.47465e-11	1.86494e-11	8.16113e-11	2.34486e-10	4.96093e-10	9.58529e-10	1.61283e-09	-1.74446e-10	-2.717e-10	-3.33276e-10	-2.94316e-11	9.18145e-10	2.50175e-09	4.70086e-09	7.3861e-09	1.04958e-08
0.168047	-4.54456e-11	-3.11459e-11	-1.16599e-11	1.55628e-11	8.46978e-11	2.31399e-10	5.11525e-10	9.66246e-10	1.5974e-09	-1.74418e-10	-2.70184e-10	-3.3029e-10	-3.8482e-11	9.10565e-10	2.50932e-09	4.70393e-09	7.38767e-09	1.04974e-08
0.168297	-4.23591e-11	-3.11459e-11	-1.32032e-11	1.55628e-11	8.31545e-11	2.31399e-10	5.14612e-10	9.55443e-10	1.60666e-09	-1.78921e-10	-2.86942e-10	-3.31833e-10	-3.09112e-11	9.07487e-10	2.50629e-09	4.70701e-09	7.38464e-09	1.04913e-08
0.168547	-4.54456e-11	-2.80593e-11	-1.01166e-11	2.32792e-11	8.46978e-11	2.31399e-10	5.06896e-10	9.52356e-10	1.59586e-09	-1.66893e-10	-2.85498e-10	-3.37952e-10	-3.08657e-11	9.10546e-10	2.50324e-09	4.70862e-09	7.38617e-09	1.04989e-08
0.168797	-5.47053e-11	-2.80593e-11	-1.16599e-11	2.17359e-11	8.31545e-11	2.31399e-10	5.00722e-10	9.539e-10	1.62364e-09	-1.91131e-10	-2.82457e-10	-3.39404e-10	-3.09021e-11	9.15076e-10	2.50624e-09	4.72082e-09	7.39072e-09	1.04989e-08
0.169047	-4.39024e-11	-3.57757e-11	-8.57335e-12	1.86494e-11	8.46978e-11	2.34486e-10	5.06896e-10	9.63159e-10	1.59894e-09	-1.76016e-10	-2.85462e-10	-3.21294e-10	-3.70206e-11	9.04473e-10	2.50017e-09	4.7193e-09	7.3847e-09	1.04975e-08
0.169297	-3.77292e-11	-3.42325e-11	-1.32032e-11	1.24762e-11	8.31545e-11	2.37572e-10	5.06896e-10	9.55443e-10	1.60512e-09	-1.74382e-10	-2.80887e-10	-3.51596e-10	-4.00708e-11	9.12008e-10	2.50325e-09	4.70718e-09	7.39382e-09	1.05158e-08
0.169547	-4.54456e-11	-2.96026e-11	-7.03006e-12	9.38966e-12	8.16113e-11	2.25226e-10	5.06896e-10	9.67789e-10	1.61129e-09	-1.71332e-10	-2.77837e-10	-3.36472e-10	-3.40068e-11	9.0746e-10	2.51393e-09	4.7224e-09	7.3939e-09	1.05097e-08
0.169797	-4.23591e-11	-2.96026e-11	-5.48678e-12	2.17359e-11	8.16113e-11	2.26769e-10	5.20785e-10	9.67789e-10	1.60975e-09	-1.72839e-10	-2.82394e-10	-3.27203e-10	-3.70479e-11	9.04401e-10	2.51096e-09	4.73005e-09	7.39852e-09	1.05006e-08
0.170047	-5.00755e-11	-3.11459e-11	-2.40021e-12	1.24762e-11	8.16113e-11	2.31399e-10	5.13069e-10	9.67789e-10	1.60203e-09	-1.72848e-10	-2.8243e-10	-3.22601e-10	-4.16141e-11	9.07451e-10	2.51396e-09	4.71788e-09	7.40621e-09	1.05143e-08
0.170298	-4.23591e-11	-2.34295e-11	-7.03006e-12	2.01926e-11	8.31545e-11	2.29856e-10	5.06896e-10	9.58529e-10	1.61438e-09	-1.72811e-10	-2.839e-10	-3.27167e-10	-3.70752e-11	9.10546e-10	2.50938e-09	4.71635e-09	7.41234e-09	1.0519e-08
0.170548	-4.08158e-11	-2.80593e-11	-1.47465e-11	7.84638e-12	8.93277e-11	2.34486e-10	5.05352e-10	9.61616e-10	1.61438e-09	-1.66747e-10	-2.74786e-10	-3.30281e-10	-3.85184e-11	9.15076e-10	2.50477e-09	4.72699e-09	7.40925e-09	1.05236e-08
0.170798	-4.08158e-11	-2.18862e-11	-2.40021e-12	2.01926e-11	8.31545e-11	2.26769e-10	5.14612e-10	9.73962e-10	1.61283e-09	-1.72775e-10	-2.79353e-10	-3.36399e-10	-2.93679e-11	9.04482e-10	2.50324e-09	4.72248e-09	7.39705e-09	1.05175e-08
0.171048	-3.61859e-11	-2.34295e-11	-7.03006e-12	9.38966e-12	9.0871e-11	2.32942e-10	5.11525e-10	9.66246e-10	1.61129e-09	-1.66711e-10	-2.87023e-10	-3.36399e-10	-2.78246e-11	9.13578e-10	2.50783e-09	4.72403e-09	7.40004e-09	1.05175e-08
0.171298	-3.92725e-11	-2.18862e-11	-7.03006e-12	1.71061e-11	8.46978e-11	2.29856e-10	5.22328e-10	9.61616e-10	1.62055e-09	-1.66693e-10	-2.9011e-10	-3.30263e-10	-3.39067e-11	9.15158e-10	2.51089e-09	4.73159e-09	7.40163e-09	1.05237e-08
0.171548	-4.23591e-11	-2.6516e-11	-1.01166e-11	1.86494e-11	8.62411e-11	2.25226e-10	5.11525e-10	9.64702e-10	1.62518e-09	-1.69725e-10	-2.8863e-10	-3.24126e-10	-3.2409e-11	9.15149e-10	2.50781e-09	4.71944e-09	7.41078e-09	1.05312e-08
0.171798	-4.54456e-11	-2.6516e-11	-8.5693e-13	2.63658e-11	8.62411e-11	2.34486e-10	5.06896e-10	9.66246e-10	1.62672e-09	-1.66711e-10	-2.93142e-10	-3.24144e-10	-3.0893e-11	9.12062e-10	2.50025e-09	4.7209e-09	7.40934e-09	1.05176e-08
0.172048	-4.54456e-11	-3.26892e-11	-8.57335e-12	2.79091e-11	9.0871e-11	2.32942e-10	5.03809e-10	9.50813e-10	1.61283e-09	-1.69707e-10	-2.84019e-10	-3.33286e-10	-3.39522e-11	9.05971e-10	2.5139e-09	4.72096e-09	7.41388e-09	1.05236e-08
0.172298	-5.47053e-11	-2.6516e-11	-1.7833e-11	2.01926e-11	8.77844e-11	2.31399e-10	5.13069e-10	9.67789e-10	1.61746e-09	-1.63679e-10	-2.83982e-10	-3.31833e-10	-3.69933e-11	9.10555e-10	2.50943e-09	4.73007e-09	7.40935e-09	1.05252e-08
0.172548	-3.77292e-11	-2.80593e-11	-1.32032e-11	1.55628e-11	7.85247e-11	2.31399e-10	5.03809e-10	9.64702e-10	1.61592e-09	-1.72711e-10	-2.8696e-10	-3.34847e-10	-3.24272e-11	9.18163e-10	2.51398e-09	4.72405e-09	7.41238e-09	1.05298e-08
0.172798	-4.54456e-11	-2.80593e-11	-5.48678e-12	1.09329e-11	7.85247e-11	2.40659e-10	5.14612e-10	9.69332e-10	1.62364e-09	-1.59113e-10	-2.7485e-10	-3.30317e-10	-3.09112e-11	9.10565e-10	2.51399e-09	4.72705e-09	7.4139e-09	1.05283e-08
0.173048	-4.54456e-11	-2.34295e-11	-1.16599e-11	1.55628e-11	8.46978e-11	2.34486e-10	5.05352e-10	9.69332e-10	1.62672e-09	-1.71232e-10	-2.86932e-10	-3.3482e-10	-3.69751e-11	9.07514e-10	2.51097e-09	4.72557e-09	7.40933e-09	1.05283e-08
0.173298	-3.61859e-11	-2.03429e-11	-8.57335e-12	1.71061e-11	8.77844e-11	2.31399e-10	5.09982e-10	9.73962e-10	1.62209e-09	-1.71295e-10	-2.79416e-10	-3.27276e-10	-3.23908e-11	9.15122e-10	2.5155e-09	4.73021e-09	7.40939e-09	1.05313e-08
0.173548	-4.23591e-11	-2.18862e-11	-8.57335e-12	1.55628e-11	8.31545e-11	2.36029e-10	5.13069e-10	9.52356e-10	1.6329e-09	-1.6977e-10	-2.85435e-10	-3.36418e-10	-2.47289e-11	9.15185e-10	2.51098e-09	4.74243e-09	7.42316e-09	1.05314e-08
0.173799	-4.54456e-11	-2.49728e-11	-1.7833e-11	2.01926e-11	7.85247e-11	2.32942e-10	5.08439e-10	9.56986e-10	1.62055e-09	-1.69779e-10	-2.79407e-10	-3.42427e-10	-2.32311e-11	9.18245e-10	2.51553e-09	4.74089e-09	7.43082e-09	1.05436e-08
0.174049	-5.16188e-11	-1.41698e-11	-7.03006e-12	2.48225e-11	7.85247e-11	2.34486e-10	5.11525e-10	9.73962e-10	1.62518e-09	-1.72857e-10	-2.8548e-10	-3.18126e-10	-3.545e-11	9.19724e-10	2.5171e-09	4.72565e-09	7.42329e-09	1.05423e-08
0.174299	-3.61859e-11	-2.80593e-11	-7.03006e-12	1.86494e-11	7.54381e-11	2.25226e-10	5.05352e-10	9.69332e-10	1.62672e-09	-1.77432e-10	-2.86942e-10	-3.28728e-10	-4.0089e-11	9.09085e-10	2.52014e-09	4.73019e-09	7.4324e-09	1.0559e-08
0.174549	-4.54456e-11	-2.6516e-11	-1.47465e-11	9.38966e-12	8.16113e-11	2.31399e-10	5.09982e-10	9.70876e-10	1.61746e-09	-1.743e-10	-2.70284e-10	-3.4092e-10	-3.85548e-11	9.13569e-10	2.51554e-09	4.73935e-09	7.43252e-09	1.05454e-08
0.174799	-4.85322e-11	-2.96026e-11	-1.32032e-11	1.55628e-11	8.46978e-11	2.31399e-10	5.06896e-10	9.77049e-10	1.61901e-09	-1.56236e-10	-2.88403e-10	-3.28747e-10	-3.23999e-11	9.09067e-10	2.50944e-09	4.73642e-09	7.44316e-09	1.05529e-08
0.175049	-3.46427e-11	-1.87996e-11	-1.16599e-11	2.17359e-11	7.69814e-11	2.40659e-10	5.05352e-10	9.70876e-10	1.61438e-09	-1.98674e-10	-2.74805e-10	-3.21121e-10	-2.47289e-11	9.16674e-10	2.51402e-09	4.747e-09	7.43711e-09	1.0547e-08
0.175299	-5.16188e-11	-2.34295e-11	-1.47465e-11	1.09329e-11	8.16113e-11	2.34486e-10	5.09982e-10	9.61616e-10	1.63598e-09	-1.73021e-10	-2.77827e-10	-3.33286e-10	-2.31402e-11	9.18254e-10	2.52018e-09	4.73494e-09	7.43567e-09	1.05713e-08
0.175549	-3.46427e-11	-2.6516e-11	-1.32032e-11	2.01926e-11	8.93277e-11	2.37572e-10	5.16155e-10	9.63159e-10	1.62209e-09	-1.75898e-10	-2.86932e-10	-3.34829e-10	-2.01264e-11	9.19751e-10	2.52628e-09	4.74712e-09	7.45535e-09	1.05623e-08
0.175799	-6.70516e-11	-2.49728e-11	-1.16599e-11	2.17359e-11	8.0068e-11	2.29856e-10	5.16155e-10	9.73962e-10	1.62209e-09	-1.72875e-10	-2.76366e-10	-3.25733e-10	-2.77154e-11	9.13651e-10	2.52019e-09	4.75628e-09	7.43262e-09	1.05653e-08
0.176049	-4.23591e-11	-2.96026e-11	-1.62898e-11	7.84638e-12	7.38949e-11	2.34486e-10	5.20785e-10	9.75505e-10	1.62364e-09	-1.74382e-10	-2.85471e-10	-3.33286e-10	-2.48017e-11	9.12117e-10	2.51555e-09	4.74563e-09	7.43706e-09	1.05684e-08
0.176299	-4.08158e-11	-2.03429e-11	-1.32032e-11	1.24762e-11	8.46978e-11	2.39116e-10	5.08439e-10	9.63159e-10	1.61901e-09	-1.74455e-10	-2.88576e-10	-3.30317e-10	-3.99434e-11	9.16638e-10	2.51101e-09	4.74105e-09	7.43707e-09	1.05715e-08
0.176549	-4.85322e-11	-2.03429e-11	-7.03006e-12	2.17359e-11	7.69814e-11	2.43745e-10	5.11525e-10	9.66246e-10	1.62827e-09	-1.85094e-10	-2.88576e-10	-3.36409e-10	-2.48563e-11	9.09121e-10	2.52161e-09	4.75015e-09	7.4356e-09	1.05685e-08
0.176799	-5.00755e-11	-2.49728e-11	6.86356e-13	2.17359e-11	8.31545e-11	2.11336e-10	5.19242e-10	9.66246e-10	1.61592e-09	-1.79039e-10	-2.85507e-10	-3.37915e-10	-3.68932e-11	9.22738e-10	2.51257e-09	4.74719e-09	7.4448e-09	1.05746e-08
0.177049	-4.08158e-11	-2.96026e-11	-1.62898e-11	2.17359e-11	8.93277e-11	2.37572e-10	5.14612e-10	9.58529e-10	1.62981e-09	-1.7598e-10	-2.82412e-10	-3.28801e-10	-2.48563e-11	9.12153e-10	2.52164e-09	4.75172e-09	7.45398e-09	1.05792e-08
0.1773	-4.23591e-11	-2.6516e-11	-3.9435e-12	2.01926e-11	9.24142e-11	2.32942e-10	5.11525e-10	9.69332e-10	1.62827e-09	-1.80537e-10	-2.778e-10	-3.33349e-10	-3.99889e-11	9.13633e-10	2.51718e-09	4.74864e-09	7.44942e-09	1.05838e-08
0.17755	-4.85322e-11	-1.72563e-11	-7.03006e-12	2.17359e-11	8.62411e-11	2.29856e-10	5.09982e-10	9.61616e-10	1.64061e-09	-1.80519e-10	-2.74768e-10	-3.37934e-10	-3.24544e-11	9.16747e-10	2.52625e-09	4.73803e-09	7.44332e-09	1.05763e-08
0.1778	-5.00755e-11	-1.72563e-11	-1.16599e-11	2.63658e-11	7.69814e-11	2.36029e-10	5.11525e-10	9.67789e-10	1.62672e-09	-1.72957e-10	-2.82394e-10	-3.34947e-10	-3.24181e-11	9.25861e-10	2.51875e-09	4.75172e-09	7.44787e-09	1.05959e-08
0.17805	-4.39024e-11	-2.34295e-11	-1.32032e-11	2.01926e-11	8.93277e-11	2.39116e-10	5.11525e-10	9.73962e-10	1.62827e-09	-1.83578e-10	-2.85462e-10	-3.41029e-10	-3.39795e-11	9.16792e-10	2.52931e-09	4.75639e-09	7.44938e-09	1.05732e-08
0.1783	-4.85322e-11	-2.34295e-11	-8.57335e-12	1.55628e-11	8.16113e-11	2.31399e-10	5.16155e-10	9.73962e-10	1.63598e-09	-1.8208e-10	-2.80868e-10	-3.41047e-10	-4.00344e-11	9.21322e-10	2.51873e-09	4.75947e-09	7.44332e-09	1.05777e-08
0.17855	-4.23591e-11	-3.26892e-11	-1.32032e-11	1.40195e-11	8.62411e-11	2.34486e-10	5.03809e-10	9.69332e-10	1.61438e-09	-1.75998e-10	-2.74795e-10	-3.37988e-10	-3.09294e-11	9.22847e-10	2.52321e-09	4.75952e-09	7.44793e-09	1.05899e-08
0.1788	-4.69889e-11	-2.03429e-11	-3.9435e-12	1.71061e-11	8.77844e-11	2.31399e-10	5.06896e-10	9.81679e-10	1.62827e-09	-1.8051e-10	-2.839e-10	-3.36454e-10	-3.23908e-11	9.18272e-10	2.51874e-09	4.7656e-09	7.46011e-09	1.05885e-08
0.17905	-4.85322e-11	-3.57757e-11	-1.01166e-11	1.09329e-11	8.16113e-11	2.28313e-10	5.03809e-10	9.73962e-10	1.62518e-09	-1.75943e-10	-2.82475e-10	-3.37934e-10	-3.08748e-11	9.16747e-10	2.53088e-09	4.76102e-09	7.45262e-09	1.05901e-08
0.1793	-4.08158e-11	-2.96026e-11	-1.16599e-11	1.71061e-11	8.16113e-11	2.42202e-10	5.16155e-10	9.66246e-10	1.62672e-09	-1.72884e-10	-2.89983e-10	-3.31888e-10	-3.09021e-11	9.21322e-10	2.52487e-09	4.75495e-09	7.46174e-09	1.06008e-08
0.17955	-3.77292e-11	-2.03429e-11	-1.47465e-11	1.55628e-11	9.24142e-11	2.29856e-10	5.14612e-10	9.72419e-10	1.6329e-09	-1.75898e-10	-2.71773e-10	-3.39477e-10	-3.69296e-11	9.22838e-10	2.52788e-09	4.76408e-09	7.46482e-09	1.06008e-08
0.1798	-4.23591e-11	-2.80593e-11	-1.01166e-11	1.55628e-11	8.31545e-11	2.36029e-10	5.13069e-10	9.52356e-10	1.6329e-09	-1.72866e-10	-2.79353e-10	-3.39477e-10	-2.48381e-11	9.16738e-10	2.52786e-09	4.76718e-09	7.46023e-09	1.05992e-08
0.18005	-4.39024e-11	-1.87996e-11	-8.57335e-12	1.86494e-11	9.0871e-11	2.31399e-10	5.14612e-10	9.75505e-10	1.62518e-09	-1.72839e-10	-2.9001e-10	-3.31861e-10	-3.69478e-11	9.15194e-10	2.52182e-09	4.76718e-09	7.45568e-09	1.05932e-08
0.1803	-5.31621e-11	-2.18862e-11	-8.57335e-12	1.09329e-11	8.77844e-11	2.37572e-10	5.19242e-10	9.66246e-10	1.62827e-09	-1.71368e-10	-2.79434e-10	-3.33313e-10	-3.39613e-11	9.18245e-10	2.53091e-09	4.76421e-09	7.46325e-09	1.06024e-08
0.18055	-4.69889e-11	-2.96026e-11	-2.24629e-11	1.71061e-11	9.0871e-11	2.36029e-10	5.14612e-10	9.75505e-10	1.63444e-09	-1.80464e-10	-2.8548e-10	-3.28792e-10	-3.2409e-11	9.19788e-10	2.52794e-09	4.77633e-09	7.46023e-09	1.06207e-08
0.180801	-4.08158e-11	-2.34295e-11	-1.16599e-11	1.86494e-11	8.62411e-11	2.39116e-10	5.14612e-10	9.64702e-10	1.62364e-09	-1.72902e-10	-2.87014e-10	-3.36354e-10	-3.09385e-11	9.19779e-10	2.53253e-09	4.76576e-09	7.45723e-09	1.06101e-08
0.181051	-4.23591e-11	-2.6516e-11	-1.16599e-11	1.86494e-11	8.77844e-11	2.36029e-10	5.16155e-10	9.75505e-10	1.62827e-09	-1.74355e-10	-2.82439e-10	-3.30299e-10	-4.15504e-11	9.16765e-10	2.53701e-09	4.77174e-09	7.46788e-09	1.06116e-08
0.181301	-4.39024e-11	-2.80593e-11	-8.57335e-12	7.84638e-12	7.69814e-11	2.37572e-10	5.19242e-10	9.58529e-10	1.6329e-09	-1.69825e-10	-2.80896e-10	-3.30299e-10	-3.24635e-11	9.22838e-10	2.51729e-09	4.76267e-09	7.46642e-09	1.06147e-08
0.181551	-3.92725e-11	-3.11459e-11	-1.01166e-11	1.71061e-11	8.16113e-11	2.29856e-10	5.17698e-10	9.66246e-10	1.62827e-09	-1.75871e-10	-2.8243e-10	-3.36372e-10	-3.24272e-11	9.21395e-10	2.52941e-09	4.77026e-09	7.46793e-09	1.06103e-08
0.181801	-4.39024e-11	-1.57131e-11	-1.16599e-11	1.55628e-11	7.85247e-11	2.29856e-10	5.19242e-10	9.75505e-10	1.64061e-09	-1.71332e-10	-2.85489e-10	-3.31815e-10	-3.54227e-11	9.28966e-10	2.53711e-09	4.77338e-09	7.46644e-09	1.06376e-08
0.182051	-4.69889e-11	-3.26892e-11	-1.32032e-11	2.01926e-11	8.93277e-11	2.40659e-10	5.22328e-10	9.70876e-10	1.63907e-09	-1.71332e-10	-2.85471e-10	-3.28683e-10	-2.62904e-11	9.21358e-10	2.53718e-09	4.77642e-09	7.47094e-09	1.06271e-08
0.182301	-4.23591e-11	-1.87996e-11	-1.01166e-11	2.01926e-11	8.0068e-11	2.36029e-10	5.17698e-10	9.73962e-10	1.62827e-09	-1.75889e-10	-2.7938e-10	-3.19687e-10	-2.62449e-11	9.16801e-10	2.54016e-09	4.77187e-09	7.46031e-09	1.06316e-08
0.182551	-3.46427e-11	-1.57131e-11	-8.57335e-12	1.86494e-11	8.31545e-11	2.34486e-10	5.11525e-10	9.69332e-10	1.62981e-09	-1.72857e-10	-2.80878e-10	-3.48509e-10	-2.77609e-11	9.27368e-10	2.5295e-09	4.77339e-09	7.46334e-09	1.06286e-08
0.182801	-5.47053e-11	-2.80593e-11	-1.93763e-11	1.71061e-11	8.62411e-11	2.31399e-10	5.08439e-10	9.56986e-10	1.62364e-09	-1.71314e-10	-2.82421e-10	-3.31897e-10	-2.62995e-11	9.13724e-10	2.52797e-09	4.77797e-09	7.46941e-09	1.06271e-08
0.183051	-3.92725e-11	-2.80593e-11	-1.62898e-11	2.32792e-11	8.31545e-11	2.32942e-10	5.17698e-10	9.67789e-10	1.62209e-09	-1.71332e-10	-2.83946e-10	-3.30281e-10	-3.53954e-11	9.1671e-10	2.53862e-09	4.77645e-09	7.46186e-09	1.06408e-08
0.183301	-3.77292e-11	-2.6516e-11	-1.01166e-11	1.55628e-11	8.0068e-11	2.37572e-10	5.09982e-10	9.83222e-10	1.6329e-09	-1.75907e-10	-2.8243e-10	-3.31833e-10	-2.78792e-11	9.1977e-10	2.53568e-09	4.77338e-09	7.46798e-09	1.06302e-08
0.183551	-5.16188e-11	-2.03429e-11	-1.7833e-11	1.40195e-11	8.31545e-11	2.28313e-10	5.11525e-10	9.64702e-10	1.62672e-09	-1.7598e-10	-2.82366e-10	-3.37924e-10	-3.70115e-11	9.18263e-10	2.54329e-09	4.7719e-09	7.47866e-09	1.06348e-08
0.183801	-4.39024e-11	-2.6516e-11	-1.16599e-11	1.71061e-11	8.62411e-11	2.37572e-10	5.11525e-10	9.70876e-10	1.63444e-09	-1.83614e-10	-2.73289e-10	-3.3492e-10	-4.16141e-11	9.1829e-10	2.54328e-09	4.78105e-09	7.47413e-09	1.06424e-08
0.184051	-5.93352e-11	-2.03429e-11	-1.47465e-11	1.09329e-11	8.62411e-11	2.34486e-10	5.22328e-10	9.73962e-10	1.63753e-09	-1.85158e-10	-2.85444e-10	-3.36418e-10	-3.7057e-11	9.244e-10	2.53412e-09	4.78264e-09	7.47104e-09	1.06348e-08
0.184301	-4.39024e-11	-2.49728e-11	-1.01166e-11	2.48225e-11	8.16113e-11	2.36029e-10	5.13069e-10	9.56986e-10	1.63135e-09	-1.8061e-10	-2.87014e-10	-3.34865e-10	-3.54773e-11	9.25916e-10	2.53254e-09	4.78569e-09	7.46956e-09	1.06379e-08
0.184552	-4.85322e-11	-3.11459e-11	-7.03006e-12	2.63658e-11	8.16113e-11	2.32942e-10	5.13069e-10	9.75505e-10	1.62827e-09	-1.8366e-10	-2.82439e-10	-3.28765e-10	-3.09385e-11	9.1829e-10	2.53257e-09	4.78265e-09	7.47872e-09	1.06501e-08
0.184802	-5.00755e-11	-2.49728e-11	-1.01166e-11	1.86494e-11	8.16113e-11	2.31399e-10	5.09982e-10	9.72419e-10	1.62981e-09	-1.88208e-10	-2.80878e-10	-3.30254e-10	-3.85366e-11	9.1672e-10	2.54021e-09	4.78266e-09	7.48191e-09	1.0644e-08
0.185052	-3.77292e-11	-2.49728e-11	-5.48678e-12	1.40195e-11	8.93277e-11	2.37572e-10	5.19242e-10	9.64702e-10	1.64216e-09	-1.8061e-10	-2.79353e-10	-3.30217e-10	-3.85639e-11	9.16738e-10	2.54174e-09	4.78725e-09	7.49712e-09	1.06349e-08
0.185302	-4.69889e-11	-2.96026e-11	-1.47465e-11	1.09329e-11	8.77844e-11	2.34486e-10	5.16155e-10	9.70876e-10	1.63907e-09	-1.80564e-10	-2.80896e-10	-3.2261e-10	-3.55046e-11	9.21313e-10	2.53568e-09	4.78882e-09	7.48651e-09	1.06471e-08
0.185552	-4.69889e-11	-2.49728e-11	-2.40021e-12	2.17359e-11	8.62411e-11	2.34486e-10	5.14612e-10	9.67789e-10	1.6437e-09	-1.80537e-10	-2.85426e-10	-3.25669e-10	-3.39704e-11	9.21349e-10	2.54025e-09	4.79187e-09	7.48345e-09	1.06609e-08
0.185802	-4.54456e-11	-3.26892e-11	-1.47465e-11	1.86494e-11	8.31545e-11	2.36029e-10	5.17698e-10	9.75505e-10	1.63135e-09	-1.75989e-10	-2.76339e-10	-3.3482e-10	-3.54864e-11	9.22838e-10	2.54642e-09	4.79037e-09	7.49115e-09	1.06563e-08
0.186052	-4.54456e-11	-1.72563e-11	-7.03006e-12	2.63658e-11	8.31545e-11	2.39116e-10	5.05352e-10	9.67789e-10	1.63598e-09	-1.80482e-10	-2.82385e-10	-3.31851e-10	-3.54773e-11	9.16756e-10	2.55252e-09	4.79187e-09	7.50796e-09	1.06472e-08
0.186302	-4.39024e-11	-2.18862e-11	-7.03006e-12	2.01926e-11	7.69814e-11	2.43745e-10	5.08439e-10	9.72419e-10	1.64216e-09	-1.71377e-10	-2.82394e-10	-3.36372e-10	-3.24363e-11	9.18254e-10	2.54642e-09	4.78887e-09	7.50659e-09	1.06517e-08
0.186552	-5.31621e-11	-4.04056e-11	-1.93763e-11	2.01926e-11	8.46978e-11	2.32942e-10	5.22328e-10	9.67789e-10	1.63444e-09	-1.74409e-10	-2.77846e-10	-3.30263e-10	-3.39249e-11	9.19797e-10	2.54028e-09	4.79643e-09	7.51413e-09	1.06472e-08
0.186802	-4.39024e-11	-3.26892e-11	-1.47465e-11	1.24762e-11	8.77844e-11	2.31399e-10	5.11525e-10	9.69332e-10	1.65913e-09	-1.805e-10	-2.82394e-10	-3.24162e-10	-3.08839e-11	9.2134e-10	2.54026e-09	4.78885e-09	7.50201e-09	1.06547e-08
0.187052	-4.23591e-11	-2.03429e-11	-7.03006e-12	1.71061e-11	7.54381e-11	2.39116e-10	5.09982e-10	9.87852e-10	1.62672e-09	-1.75953e-10	-2.82403e-10	-3.30217e-10	-3.09112e-11	9.22874e-10	2.54339e-09	4.78884e-09	7.50806e-09	1.06426e-08
0.187302	-4.23591e-11	-1.87996e-11	-1.01166e-11	2.32792e-11	8.62411e-11	2.32942e-10	5.14612e-10	9.70876e-10	1.63598e-09	-1.744e-10	-2.79316e-10	-3.28747e-10	-3.85275e-11	9.22838e-10	2.5555e-09	4.79337e-09	7.51113e-09	1.06548e-08
0.187552	-4.23591e-11	-2.34295e-11	-1.47465e-11	7.84638e-12	8.31545e-11	2.26769e-10	5.16155e-10	9.73962e-10	1.65141e-09	-1.74437e-10	-2.73216e-10	-3.31742e-10	-3.7057e-11	9.1524e-10	2.53888e-09	4.78576e-09	7.50972e-09	1.06564e-08
0.187802	-4.39024e-11	-2.80593e-11	-1.01166e-11	2.17359e-11	8.31545e-11	2.31399e-10	5.09982e-10	9.75505e-10	1.64987e-09	-1.81935e-10	-2.76284e-10	-3.2419e-10	-3.85366e-11	9.19806e-10	2.5525e-09	4.78423e-09	7.52491e-09	1.0664e-08
0.188053	-4.54456e-11	-2.6516e-11	-1.32032e-11	1.55628e-11	8.31545e-11	2.39116e-10	5.14612e-10	9.81679e-10	1.64061e-09	-1.60793e-10	-2.85471e-10	-3.33304e-10	-3.24272e-11	9.25888e-10	2.55097e-09	4.79183e-09	7.51588e-09	1.0661e-08
0.188303	-5.16188e-11	-2.49728e-11	-1.32032e-11	1.71061e-11	9.24142e-11	2.31399e-10	5.25415e-10	9.75505e-10	1.64061e-09	-1.88071e-10	-2.88521e-10	-3.34856e-10	-2.93315e-11	9.18326e-10	2.53723e-09	4.78884e-09	7.52192e-09	1.06656e-08
0.188553	-4.69889e-11	-2.18862e-11	-1.32032e-11	1.86494e-11	9.0871e-11	2.34486e-10	5.20785e-10	9.73962e-10	1.64987e-09	-1.80555e-10	-2.79398e-10	-3.30299e-10	-2.78155e-11	9.2282e-10	2.53572e-09	4.79032e-09	7.52042e-09	1.06642e-08
0.188803	-3.46427e-11	-2.96026e-11	-1.32032e-11	2.17359e-11	8.46978e-11	2.42202e-10	5.11525e-10	9.72419e-10	1.64524e-09	-1.71386e-10	-2.80832e-10	-3.31861e-10	-3.23999e-11	9.16774e-10	2.55245e-09	4.7858e-09	7.51887e-09	1.06733e-08
0.189053	-6.08785e-11	-1.87996e-11	-3.9435e-12	2.17359e-11	8.31545e-11	2.46832e-10	5.16155e-10	9.72419e-10	1.64833e-09	-1.75925e-10	-2.74768e-10	-3.425e-10	-3.53772e-11	9.21249e-10	2.54494e-09	4.79496e-09	7.51582e-09	1.06718e-08
0.189303	-4.54456e-11	-2.96026e-11	-1.01166e-11	1.55628e-11	8.46978e-11	2.34486e-10	5.23872e-10	9.78592e-10	1.64987e-09	-1.79021e-10	-2.79298e-10	-3.34893e-10	-1.87924e-11	9.10619e-10	2.54797e-09	4.80113e-09	7.51737e-09	1.06688e-08
0.189553	-4.69889e-11	-1.72563e-11	-1.01166e-11	2.32792e-11	7.85247e-11	2.40659e-10	5.14612e-10	9.69332e-10	1.6545e-09	-1.82053e-10	-2.77791e-10	-3.27267e-10	-4.76143e-11	9.13688e-10	2.55253e-09	4.80269e-09	7.52501e-09	1.06824e-08
0.189803	-4.85322e-11	-3.57757e-11	-1.16599e-11	2.17359e-11	8.77844e-11	2.46832e-10	5.23872e-10	9.77049e-10	1.65141e-09	-1.75971e-10	-2.76293e-10	-3.34802e-10	-3.86367e-11	9.27432e-10	2.54652e-09	4.80268e-09	7.5251e-09	1.06689e-08
0.190053	-4.23591e-11	-2.18862e-11	-1.01166e-11	1.55628e-11	8.46978e-11	2.29856e-10	5.16155e-10	9.67789e-10	1.64987e-09	-1.75971e-10	-2.82357e-10	-3.27185e-10	-3.85366e-11	9.27486e-10	2.55713e-09	4.79963e-09	7.53263e-09	1.0681e-08
0.190303	-4.39024e-11	-2.49728e-11	-1.01166e-11	1.71061e-11	8.31545e-11	2.34486e-10	5.11525e-10	9.63159e-10	1.64987e-09	-1.82035e-10	-2.77827e-10	-3.21112e-10	-3.09567e-11	9.22929e-10	2.55258e-09	4.79959e-09	7.51753e-09	1.0681e-08
0.190553	-4.69889e-11	-2.6516e-11	-7.03006e-12	2.63658e-11	8.31545e-11	2.40659e-10	5.23872e-10	9.73962e-10	1.64987e-09	-1.76044e-10	-2.79343e-10	-3.33295e-10	-3.85093e-11	9.25925e-10	2.54653e-09	4.79657e-09	7.53415e-09	1.0678e-08
0.190803	-4.54456e-11	-3.11459e-11	-1.16599e-11	1.24762e-11	8.31545e-11	2.28313e-10	5.08439e-10	9.77049e-10	1.64987e-09	-1.88162e-10	-2.8243e-10	-3.3639e-10	-3.38794e-11	9.21368e-10	2.55869e-09	4.80111e-09	7.52355e-09	1.06857e-08
0.191053	-4.54456e-11	-3.11459e-11	-3.9435e-12	4.75981e-12	8.62411e-11	2.36029e-10	5.25415e-10	9.69332e-10	1.64987e-09	-1.8061e-10	-2.86996e-10	-3.31861e-10	-1.71308e-11	9.21331e-10	2.55875e-09	4.79812e-09	7.52045e-09	1.06918e-08
0.191303	-3.92725e-11	-2.18862e-11	-2.09196e-11	1.86494e-11	8.46978e-11	2.36029e-10	5.17698e-10	9.80135e-10	1.65604e-09	-1.80528e-10	-2.8243e-10	-3.36336e-10	-2.62176e-11	9.19788e-10	2.5572e-09	4.80427e-09	7.52201e-09	1.06828e-08
0.191554	-5.47053e-11	-2.96026e-11	-1.93763e-11	1.86494e-11	8.77844e-11	2.39116e-10	5.20785e-10	9.73962e-10	1.65913e-09	-1.74446e-10	-2.79343e-10	-3.24208e-10	-3.23908e-11	9.16747e-10	2.55263e-09	4.8149e-09	7.53118e-09	1.06979e-08
0.191804	-4.85322e-11	-2.34295e-11	-1.01166e-11	2.48225e-11	8.77844e-11	2.40659e-10	5.20785e-10	9.81679e-10	1.65141e-09	-1.77432e-10	-2.77782e-10	-3.31742e-10	-3.55137e-11	9.19806e-10	2.55413e-09	4.80129e-09	7.53278e-09	1.06966e-08
0.192054	-3.92725e-11	-2.03429e-11	-7.03006e-12	1.71061e-11	8.46978e-11	2.42202e-10	5.16155e-10	9.83222e-10	1.65141e-09	-1.72866e-10	-2.74723e-10	-3.28738e-10	-4.1605e-11	9.24381e-10	2.55416e-09	4.81045e-09	7.53732e-09	1.07042e-08
0.192304	-4.54456e-11	-2.49728e-11	-2.09196e-11	1.55628e-11	8.31545e-11	2.40659e-10	5.13069e-10	9.72419e-10	1.64987e-09	-1.71359e-10	-2.74759e-10	-3.28665e-10	-3.70479e-11	9.21349e-10	2.55879e-09	4.82572e-09	7.5298e-09	1.07042e-08
0.192554	-4.23591e-11	-2.96026e-11	-1.16599e-11	2.01926e-11	8.16113e-11	2.28313e-10	5.25415e-10	9.83222e-10	1.64987e-09	-1.78984e-10	-2.839e-10	-3.19596e-10	-3.39886e-11	9.19806e-10	2.56791e-09	4.81963e-09	7.54192e-09	1.07088e-08
0.192804	-3.92725e-11	-2.80593e-11	-1.47465e-11	1.55628e-11	9.0871e-11	2.28313e-10	5.25415e-10	9.90938e-10	1.65604e-09	-1.805e-10	-2.8243e-10	-3.33204e-10	-3.69933e-11	9.19815e-10	2.55731e-09	4.80594e-09	7.53589e-09	1.07027e-08
0.193054	-4.69889e-11	-1.41698e-11	-1.01166e-11	2.01926e-11	8.62411e-11	2.39116e-10	5.13069e-10	9.77049e-10	1.65604e-09	-1.71395e-10	-2.82421e-10	-3.2261e-10	-3.2409e-11	9.22829e-10	2.56189e-09	4.81807e-09	7.53597e-09	1.07088e-08
0.193304	-5.31621e-11	-2.96026e-11	-1.62898e-11	2.32792e-11	8.0068e-11	2.31399e-10	5.03809e-10	9.87852e-10	1.66067e-09	-1.77432e-10	-2.82375e-10	-3.22537e-10	-2.78428e-11	9.16774e-10	2.57257e-09	4.81967e-09	7.55571e-09	1.07149e-08
0.193554	-4.23591e-11	-2.80593e-11	-1.93763e-11	1.55628e-11	8.31545e-11	2.31399e-10	5.19242e-10	9.81679e-10	1.64987e-09	-1.75925e-10	-2.74795e-10	-3.21039e-10	-3.39158e-11	9.21349e-10	2.5696e-09	4.81967e-09	7.54063e-09	1.07089e-08
0.193804	-3.61859e-11	-2.49728e-11	-1.01166e-11	2.32792e-11	8.31545e-11	2.31399e-10	5.19242e-10	9.80135e-10	1.66376e-09	-1.72902e-10	-2.82385e-10	-3.25596e-10	-3.3934e-11	9.27459e-10	2.57261e-09	4.81812e-09	7.54966e-09	1.0718e-08
0.194054	-3.92725e-11	-2.6516e-11	-1.16599e-11	2.01926e-11	8.16113e-11	2.29856e-10	5.28502e-10	9.80135e-10	1.65759e-09	-1.78948e-10	-2.83937e-10	-3.24162e-10	-3.09294e-11	9.24427e-10	2.56801e-09	4.81507e-09	7.54515e-09	1.07043e-08
0.194304	-4.08158e-11	-2.03429e-11	-5.48678e-12	2.48225e-11	8.46978e-11	2.39116e-10	5.20785e-10	9.77049e-10	1.66067e-09	-1.72921e-10	-2.80841e-10	-3.34811e-10	-3.85093e-11	9.21377e-10	2.56041e-09	4.81661e-09	7.5467e-09	1.07119e-08
0.194554	-4.39024e-11	-2.96026e-11	-1.47465e-11	1.55628e-11	8.31545e-11	2.34486e-10	5.22328e-10	9.84765e-10	1.65759e-09	-1.78957e-10	-2.71709e-10	-3.31842e-10	-3.39704e-11	9.24445e-10	2.56949e-09	4.82122e-09	7.55591e-09	1.07104e-08
0.194804	-4.85322e-11	-2.49728e-11	-1.16599e-11	1.86494e-11	8.16113e-11	2.36029e-10	5.19242e-10	9.90938e-10	1.6653e-09	-1.744e-10	-2.77736e-10	-3.34792e-10	-3.24544e-11	9.30554e-10	2.5665e-09	4.82578e-09	7.56349e-09	1.0718e-08
0.195054	-5.16188e-11	-3.11459e-11	-1.32032e-11	1.55628e-11	7.85247e-11	2.29856e-10	5.22328e-10	9.80135e-10	1.66222e-09	-1.71323e-10	-2.74768e-10	-3.21112e-10	-3.85093e-11	9.29057e-10	2.56651e-09	4.8198e-09	7.54677e-09	1.07135e-08
0.195305	-3.30994e-11	-1.41698e-11	-1.47465e-11	2.48225e-11	8.93277e-11	2.37572e-10	5.20785e-10	9.84765e-10	1.66222e-09	-1.71341e-10	-2.82403e-10	-3.25551e-10	-3.24453e-11	9.27495e-10	2.5711e-09	4.83498e-09	7.54978e-09	1.07212e-08
0.195555	-4.39024e-11	-1.87996e-11	-1.01166e-11	1.55628e-11	8.77844e-11	2.31399e-10	5.17698e-10	9.77049e-10	1.66222e-09	-1.77459e-10	-2.86951e-10	-3.16555e-10	-3.24363e-11	9.22929e-10	2.57419e-09	4.82893e-09	7.55894e-09	1.07288e-08
0.195805	-5.00755e-11	-2.03429e-11	-1.47465e-11	2.48225e-11	8.62411e-11	2.34486e-10	5.25415e-10	9.84765e-10	1.64524e-09	-1.80573e-10	-2.74814e-10	-3.3777e-10	-3.70297e-11	9.2597e-10	2.57567e-09	4.82283e-09	7.55749e-09	1.07258e-08
0.196055	-4.39024e-11	-2.49728e-11	-1.93763e-11	1.86494e-11	8.46978e-11	2.36029e-10	5.14612e-10	9.89395e-10	1.66222e-09	-1.85094e-10	-2.80868e-10	-3.24199e-10	-4.01163e-11	9.29029e-10	2.56502e-09	4.82894e-09	7.56049e-09	1.07274e-08
0.196305	-4.39024e-11	-2.03429e-11	-1.7833e-11	1.86494e-11	8.46978e-11	2.42202e-10	5.23872e-10	9.73962e-10	1.67919e-09	-1.72984e-10	-2.85489e-10	-3.28656e-10	-4.1605e-11	9.27532e-10	2.56801e-09	4.83656e-09	7.55447e-09	1.07304e-08
0.196555	-4.23591e-11	-2.80593e-11	-1.62898e-11	9.38966e-12	8.93277e-11	2.31399e-10	5.22328e-10	9.84765e-10	1.66067e-09	-1.83569e-10	-2.87023e-10	-3.22637e-10	-3.24181e-11	9.2902e-10	2.56959e-09	4.82899e-09	7.56503e-09	1.07274e-08
0.196805	-3.61859e-11	-2.6516e-11	-7.03006e-12	1.86494e-11	8.93277e-11	2.32942e-10	5.17698e-10	9.81679e-10	1.67456e-09	-1.80546e-10	-2.84028e-10	-3.31733e-10	-2.47926e-11	9.24481e-10	2.57413e-09	4.83046e-09	7.55143e-09	1.07289e-08
0.197055	-4.08158e-11	-2.80593e-11	-1.16599e-11	1.40195e-11	8.16113e-11	2.37572e-10	5.22328e-10	9.84765e-10	1.65913e-09	-1.74473e-10	-2.91635e-10	-3.28738e-10	-3.38885e-11	9.29038e-10	2.56814e-09	4.829e-09	7.56202e-09	1.0729e-08
0.197305	-3.92725e-11	-2.03429e-11	-1.62898e-11	1.24762e-11	8.77844e-11	2.36029e-10	5.22328e-10	9.90938e-10	1.65604e-09	-1.82071e-10	-2.91662e-10	-3.2871e-10	-3.24544e-11	9.30618e-10	2.5817e-09	4.83806e-09	7.56061e-09	1.07396e-08
0.197555	-5.00755e-11	-2.34295e-11	-1.01166e-11	2.01926e-11	8.16113e-11	2.32942e-10	5.22328e-10	9.77049e-10	1.65604e-09	-1.83623e-10	-2.88594e-10	-3.27185e-10	-3.85457e-11	9.35157e-10	2.559e-09	4.82439e-09	7.56968e-09	1.07382e-08
0.197805	-4.23591e-11	-2.49728e-11	-1.47465e-11	2.48225e-11	8.0068e-11	2.37572e-10	5.28502e-10	9.81679e-10	1.65759e-09	-1.80582e-10	-2.85526e-10	-3.27231e-10	-3.85821e-11	9.27595e-10	2.5756e-09	4.82432e-09	7.55759e-09	1.07397e-08
0.198055	-4.23591e-11	-2.49728e-11	-7.03006e-12	2.01926e-11	8.93277e-11	2.36029e-10	5.20785e-10	9.86308e-10	1.65759e-09	-1.80491e-10	-2.85517e-10	-3.36345e-10	-3.85912e-11	9.33623e-10	2.5696e-09	4.82745e-09	7.56672e-09	1.07337e-08
0.198305	-3.77292e-11	-3.11459e-11	-1.62898e-11	1.40195e-11	9.0871e-11	2.39116e-10	5.22328e-10	9.77049e-10	1.6545e-09	-1.68382e-10	-2.87014e-10	-3.30345e-10	-4.00981e-11	9.29129e-10	2.56954e-09	4.83968e-09	7.57591e-09	1.07504e-08
0.198555	-4.23591e-11	-2.18862e-11	-1.93763e-11	1.40195e-11	9.24142e-11	2.42202e-10	5.23872e-10	9.70876e-10	1.65296e-09	-1.8346e-10	-2.82394e-10	-3.37888e-10	-3.70297e-11	9.36655e-10	2.56506e-09	4.84278e-09	7.57295e-09	1.07566e-08
0.198806	-3.77292e-11	-2.34295e-11	-5.48678e-12	1.86494e-11	8.62411e-11	2.34486e-10	5.22328e-10	9.70876e-10	1.66067e-09	-1.6682e-10	-2.73289e-10	-3.30299e-10	-3.24453e-11	9.24536e-10	2.58025e-09	4.83815e-09	7.57903e-09	1.0749e-08
0.199056	-4.08158e-11	-2.6516e-11	-1.93763e-11	1.40195e-11	8.46978e-11	2.37572e-10	5.19242e-10	9.78592e-10	1.67148e-09	-1.74327e-10	-2.85426e-10	-3.2871e-10	-3.39704e-11	9.306e-10	2.57579e-09	4.82597e-09	7.57909e-09	1.0749e-08
0.199306	-4.54456e-11	-2.49728e-11	-1.16599e-11	1.24762e-11	8.62411e-11	2.42202e-10	5.09982e-10	9.70876e-10	1.65913e-09	-1.71286e-10	-2.83964e-10	-3.25706e-10	-3.85002e-11	9.36709e-10	2.57875e-09	4.83351e-09	7.5836e-09	1.07535e-08
0.199556	-3.92725e-11	-2.80593e-11	-5.48678e-12	1.40195e-11	9.39575e-11	2.42202e-10	5.25415e-10	9.75505e-10	1.66222e-09	-1.65213e-10	-2.82448e-10	-3.34811e-10	-2.93861e-11	9.32143e-10	2.56967e-09	4.83207e-09	7.57302e-09	1.0749e-08
0.199806	-3.61859e-11	-3.42325e-11	-1.32032e-11	1.71061e-11	8.62411e-11	2.36029e-10	5.26958e-10	9.90938e-10	1.66993e-09	-1.72839e-10	-2.85498e-10	-3.3029e-10	-3.08384e-11	9.27532e-10	2.5772e-09	4.83817e-09	7.58369e-09	1.07475e-08
0.200056	-4.39024e-11	-3.57757e-11	-8.57335e-12	2.01926e-11	9.24142e-11	2.32942e-10	5.23872e-10	9.80135e-10	1.67456e-09	-1.78939e-10	-2.86996e-10	-3.30263e-10	-2.78519e-11	9.25997e-10	2.57118e-09	4.83968e-09	7.59283e-09	1.07643e-08
0.200306	-4.54456e-11	-2.80593e-11	-1.32032e-11	2.01926e-11	8.46978e-11	2.37572e-10	5.13069e-10	9.78592e-10	1.66376e-09	-1.71395e-10	-2.79389e-10	-3.30217e-10	-3.69842e-11	9.2902e-10	2.57719e-09	4.83213e-09	7.58072e-09	1.07674e-08
0.200556	-4.85322e-11	-2.80593e-11	-8.57335e-12	2.17359e-11	7.38949e-11	2.36029e-10	5.20785e-10	9.80135e-10	1.66067e-09	-1.78939e-10	-2.80859e-10	-3.22637e-10	-3.69842e-11	9.25997e-10	2.56814e-09	4.84273e-09	7.58676e-09	1.07507e-08
0.200806	-4.08158e-11	-3.26892e-11	-1.62898e-11	7.84638e-12	9.24142e-11	2.32942e-10	5.26958e-10	9.95568e-10	1.67611e-09	-1.72866e-10	-2.79362e-10	-3.30144e-10	-2.78519e-11	9.27523e-10	2.57876e-09	4.8382e-09	7.58984e-09	1.07689e-08
0.201056	-5.16188e-11	-2.96026e-11	-1.47465e-11	1.86494e-11	8.93277e-11	2.36029e-10	5.30045e-10	9.77049e-10	1.66067e-09	-1.69698e-10	-2.82339e-10	-3.17998e-10	-3.08839e-11	9.30609e-10	2.57884e-09	4.8351e-09	7.58833e-09	1.07629e-08
0.201306	-3.92725e-11	-2.49728e-11	-8.57335e-12	1.40195e-11	9.24142e-11	2.31399e-10	5.19242e-10	9.81679e-10	1.66376e-09	-1.56181e-10	-2.71763e-10	-3.19496e-10	-3.70024e-11	9.35175e-10	2.58187e-09	4.83058e-09	7.58837e-09	1.07599e-08
0.201556	-4.08158e-11	-2.03429e-11	2.22964e-12	2.17359e-11	8.93277e-11	2.37572e-10	5.20785e-10	9.73962e-10	1.66222e-09	-1.94153e-10	-2.85398e-10	-3.27121e-10	-3.70206e-11	9.30573e-10	2.57735e-09	4.84281e-09	7.59598e-09	1.07766e-08
0.201806	-4.08158e-11	-2.49728e-11	-1.01166e-11	1.86494e-11	8.31545e-11	2.28313e-10	5.22328e-10	9.73962e-10	1.66839e-09	-1.82217e-10	-2.80841e-10	-3.25669e-10	-3.4025e-11	9.21495e-10	2.5834e-09	4.85351e-09	7.59298e-09	1.07706e-08
0.202056	-3.30994e-11	-2.49728e-11	-1.32032e-11	1.71061e-11	8.62411e-11	2.32942e-10	5.22328e-10	9.78592e-10	1.66839e-09	-1.88144e-10	-2.70175e-10	-3.3019e-10	-4.30846e-11	9.38171e-10	2.5804e-09	4.8444e-09	7.59451e-09	1.07737e-08
0.202307	-3.77292e-11	-1.57131e-11	-8.57335e-12	1.71061e-11	8.0068e-11	2.34486e-10	5.23872e-10	9.73962e-10	1.66376e-09	-1.71414e-10	-2.76202e-10	-3.22637e-10	-3.09476e-11	9.30609e-10	2.58184e-09	4.84134e-09	7.59752e-09	1.07827e-08
0.202557	-3.92725e-11	-2.18862e-11	-1.16599e-11	1.86494e-11	9.0871e-11	2.31399e-10	5.28502e-10	9.73962e-10	1.66376e-09	-1.72875e-10	-2.74714e-10	-3.30153e-10	-3.2509e-11	9.24536e-10	2.57122e-09	4.8489e-09	7.58999e-09	1.07631e-08
0.202807	-3.30994e-11	-1.72563e-11	-1.47465e-11	1.55628e-11	8.77844e-11	2.32942e-10	5.19242e-10	9.80135e-10	1.66993e-09	-1.78984e-10	-2.74732e-10	-3.19542e-10	-5.06827e-11	9.36682e-10	2.57872e-09	4.83988e-09	7.6021e-09	1.07813e-08
0.203057	-4.69889e-11	-2.34295e-11	-1.32032e-11	2.17359e-11	9.0871e-11	2.49919e-10	5.23872e-10	9.86308e-10	1.65913e-09	-1.78975e-10	-2.79262e-10	-3.22583e-10	-2.79702e-11	9.33696e-10	2.56819e-09	4.85505e-09	7.59464e-09	1.07783e-08
0.203307	-4.23591e-11	-2.6516e-11	-1.16599e-11	1.40195e-11	9.24142e-11	2.36029e-10	5.19242e-10	9.87852e-10	1.66839e-09	-1.71323e-10	-2.717e-10	-3.31733e-10	-3.69751e-11	9.3218e-10	2.58493e-09	4.85058e-09	7.60972e-09	1.07798e-08
0.203557	-4.39024e-11	-2.49728e-11	-1.01166e-11	2.94523e-11	8.93277e-11	2.36029e-10	5.28502e-10	9.86308e-10	1.67765e-09	-1.6672e-10	-2.77773e-10	-3.28701e-10	-3.55319e-11	9.36691e-10	2.58957e-09	4.85204e-09	7.59007e-09	1.07798e-08
0.203807	-4.23591e-11	-2.03429e-11	-1.62898e-11	1.71061e-11	8.0068e-11	2.37572e-10	5.26958e-10	9.80135e-10	1.64987e-09	-1.69761e-10	-2.80796e-10	-3.22665e-10	-4.00526e-11	9.27586e-10	2.58506e-09	4.84601e-09	7.60368e-09	1.07814e-08
0.204057	-4.39024e-11	-2.6516e-11	-7.03006e-12	1.55628e-11	8.16113e-11	2.31399e-10	5.23872e-10	9.83222e-10	1.66839e-09	-1.7282e-10	-2.70129e-10	-3.36336e-10	-3.24726e-11	9.30573e-10	2.59108e-09	4.85665e-09	7.60377e-09	1.07814e-08
0.204307	-3.77292e-11	-2.80593e-11	-1.32032e-11	1.86494e-11	8.31545e-11	2.32942e-10	5.22328e-10	9.83222e-10	1.66222e-09	-1.71332e-10	-2.68595e-10	-3.33367e-10	-3.54591e-11	9.29139e-10	2.582e-09	4.85673e-09	7.60532e-09	1.07891e-08
0.204557	-3.92725e-11	-2.6516e-11	-8.57335e-12	1.71061e-11	8.93277e-11	2.40659e-10	5.22328e-10	9.81679e-10	1.66376e-09	-1.74373e-10	-2.777e-10	-3.33358e-10	-3.24726e-11	9.41267e-10	2.58648e-09	4.85977e-09	7.60993e-09	1.07936e-08
0.204807	-4.54456e-11	-2.6516e-11	-1.7833e-11	1.09329e-11	9.0871e-11	2.32942e-10	5.13069e-10	9.69332e-10	1.67302e-09	-1.74364e-10	-2.71663e-10	-3.34893e-10	-4.00799e-11	9.30682e-10	2.58042e-09	4.85824e-09	7.61452e-09	1.07784e-08
0.205057	-4.08158e-11	-2.49728e-11	-8.57335e-12	1.71061e-11	9.0871e-11	2.28313e-10	5.22328e-10	9.75505e-10	1.66376e-09	-1.69825e-10	-2.73198e-10	-3.3639e-10	-4.01163e-11	9.33687e-10	2.58197e-09	4.85372e-09	7.61298e-09	1.07891e-08
0.205307	-4.08158e-11	-2.6516e-11	-1.32032e-11	2.01926e-11	8.62411e-11	2.32942e-10	5.36218e-10	9.81679e-10	1.66993e-09	-1.75889e-10	-2.80868e-10	-3.30263e-10	-3.85457e-11	9.36764e-10	2.59265e-09	4.86435e-09	7.60537e-09	1.07953e-08
0.205557	-3.92725e-11	-2.6516e-11	-1.01166e-11	2.01926e-11	8.16113e-11	2.31399e-10	5.14612e-10	9.73962e-10	1.6653e-09	-1.744e-10	-2.86914e-10	-3.24117e-10	-3.0893e-11	9.38262e-10	2.5927e-09	4.86137e-09	7.60993e-09	1.07983e-08
0.205807	-3.92725e-11	-1.57131e-11	-5.48678e-12	1.55628e-11	7.85247e-11	2.36029e-10	5.28502e-10	9.84765e-10	1.66685e-09	-1.74355e-10	-2.70202e-10	-3.22546e-10	-2.7861e-11	9.30673e-10	2.58967e-09	4.86293e-09	7.61454e-09	1.07938e-08
0.206058	-4.23591e-11	-2.49728e-11	-1.01166e-11	9.38966e-12	7.54381e-11	2.36029e-10	5.25415e-10	1.00174e-09	1.65296e-09	-1.68263e-10	-2.74714e-10	-3.21048e-10	-3.85002e-11	9.35166e-10	2.59273e-09	4.87198e-09	7.6161e-09	1.0803e-08
0.206308	-3.92725e-11	-2.49728e-11	-7.03006e-12	1.86494e-11	8.31545e-11	2.32942e-10	5.26958e-10	9.72419e-10	1.65913e-09	-1.69743e-10	-2.80796e-10	-3.2714e-10	-3.55228e-11	9.29148e-10	2.59883e-09	4.85385e-09	7.61613e-09	1.08091e-08
0.206558	-4.08158e-11	-1.57131e-11	-1.16599e-11	1.40195e-11	7.85247e-11	2.34486e-10	5.23872e-10	9.69332e-10	1.66376e-09	-1.68209e-10	-2.73252e-10	-3.27149e-10	-3.7057e-11	9.38298e-10	2.5943e-09	4.87349e-09	7.62068e-09	1.08076e-08
0.206808	-4.39024e-11	-2.49728e-11	-1.01166e-11	1.86494e-11	8.62411e-11	2.37572e-10	5.28502e-10	9.73962e-10	1.67148e-09	-1.65159e-10	-2.80823e-10	-3.2261e-10	-4.16141e-11	9.44362e-10	2.59731e-09	4.86001e-09	7.61613e-09	1.08062e-08
0.207058	-3.92725e-11	-2.34295e-11	-1.16599e-11	1.71061e-11	8.46978e-11	2.40659e-10	5.19242e-10	9.84765e-10	1.66685e-09	-1.66693e-10	-2.79325e-10	-3.28656e-10	-3.70934e-11	9.29211e-10	2.59432e-09	4.88122e-09	7.6161e-09	1.08275e-08
0.207308	-4.08158e-11	-2.80593e-11	-3.9435e-12	1.55628e-11	7.23516e-11	2.37572e-10	5.28502e-10	9.73962e-10	1.66839e-09	-1.71268e-10	-2.76284e-10	-3.24117e-10	-4.1605e-11	9.39814e-10	2.60187e-09	4.87221e-09	7.61461e-09	1.08215e-08
0.207558	-4.23591e-11	-2.18862e-11	-8.57335e-12	2.01926e-11	8.16113e-11	2.34486e-10	5.23872e-10	9.86308e-10	1.6653e-09	-1.6977e-10	-2.79262e-10	-3.24108e-10	-3.55046e-11	9.42846e-10	2.59129e-09	4.87363e-09	7.62224e-09	1.08184e-08
0.207808	-4.23591e-11	-2.6516e-11	-1.47465e-11	2.17359e-11	8.93277e-11	2.37572e-10	5.28502e-10	9.95568e-10	1.66685e-09	-1.69752e-10	-2.70211e-10	-3.27103e-10	-3.08657e-11	9.29184e-10	2.60032e-09	4.8661e-09	7.62379e-09	1.082e-08
0.208058	-3.92725e-11	-3.11459e-11	-1.7833e-11	2.17359e-11	7.54381e-11	2.37572e-10	5.19242e-10	9.78592e-10	1.66222e-09	-1.68218e-10	-2.83846e-10	-3.17998e-10	-2.63268e-11	9.36673e-10	2.59129e-09	4.8797e-09	7.6208e-09	1.08245e-08
0.208308	-3.77292e-11	-3.26892e-11	-1.16599e-11	2.17359e-11	8.16113e-11	2.37572e-10	5.34675e-10	9.78592e-10	1.66685e-09	-1.66766e-10	-2.77827e-10	-3.22583e-10	-3.70024e-11	9.27613e-10	2.6019e-09	4.86615e-09	7.62848e-09	1.08185e-08
0.208558	-4.39024e-11	-2.49728e-11	-3.9435e-12	1.86494e-11	8.93277e-11	2.29856e-10	5.31588e-10	9.80135e-10	1.66839e-09	-1.80482e-10	-2.77837e-10	-3.33231e-10	-4.1605e-11	9.35212e-10	2.60049e-09	4.88126e-09	7.64073e-09	1.08307e-08
0.208808	-3.46427e-11	-2.03429e-11	-7.03006e-12	1.86494e-11	8.93277e-11	2.40659e-10	5.23872e-10	9.90938e-10	1.66376e-09	-1.80464e-10	-2.85389e-10	-3.24226e-10	-3.55956e-11	9.39841e-10	2.60799e-09	4.87226e-09	7.64223e-09	1.08262e-08
0.209058	-5.16188e-11	-3.42325e-11	-1.16599e-11	1.86494e-11	8.62411e-11	2.40659e-10	5.25415e-10	9.81679e-10	1.66993e-09	-1.63688e-10	-2.73207e-10	-3.37834e-10	-4.61256e-11	9.41403e-10	2.58829e-09	4.88284e-09	7.62555e-09	1.08338e-08
0.209308	-4.39024e-11	-2.34295e-11	-7.03006e-12	1.40195e-11	8.46978e-11	2.40659e-10	5.20785e-10	9.89395e-10	1.67148e-09	-1.63643e-10	-2.68604e-10	-3.27222e-10	-2.79156e-11	9.42946e-10	2.60189e-09	4.87532e-09	7.63916e-09	1.08338e-08
0.209559	-3.77292e-11	-2.03429e-11	-7.03006e-12	1.86494e-11	9.0871e-11	2.42202e-10	5.23872e-10	9.78592e-10	1.67302e-09	-1.72793e-10	-2.76166e-10	-3.24126e-10	-3.24453e-11	9.44444e-10	2.60197e-09	4.88289e-09	7.63768e-09	1.08324e-08
0.209809	-4.54456e-11	-1.72563e-11	-1.16599e-11	1.71061e-11	8.31545e-11	2.31399e-10	5.16155e-10	9.83222e-10	1.66993e-09	-1.72866e-10	-2.70065e-10	-3.27103e-10	-4.3121e-11	9.3838e-10	2.60047e-09	4.88147e-09	7.63161e-09	1.08431e-08
0.210059	-4.85322e-11	-1.72563e-11	-8.57335e-12	1.71061e-11	8.93277e-11	2.28313e-10	5.26958e-10	9.78592e-10	1.67919e-09	-1.75852e-10	-2.62431e-10	-3.18007e-10	-3.8573e-11	9.42864e-10	2.60509e-09	4.89062e-09	7.63773e-09	1.08492e-08
0.210309	-3.92725e-11	-2.80593e-11	-1.32032e-11	2.17359e-11	8.77844e-11	2.31399e-10	5.30045e-10	9.94025e-10	1.67148e-09	-1.65195e-10	-2.67015e-10	-3.24035e-10	-3.24363e-11	9.33769e-10	2.61428e-09	4.89217e-09	7.64681e-09	1.08448e-08
0.210559	-4.54456e-11	-2.49728e-11	-1.32032e-11	1.55628e-11	8.77844e-11	2.40659e-10	5.17698e-10	9.87852e-10	1.66685e-09	-1.65159e-10	-2.76193e-10	-3.21094e-10	-3.0893e-11	9.38253e-10	2.61567e-09	4.88767e-09	7.62863e-09	1.08645e-08
0.210809	-4.23591e-11	-2.80593e-11	-1.01166e-11	1.71061e-11	8.0068e-11	2.29856e-10	5.19242e-10	9.92482e-10	1.6653e-09	-1.69752e-10	-2.7622e-10	-3.3324e-10	-3.39522e-11	9.32225e-10	2.58374e-09	4.8983e-09	7.64072e-09	1.08479e-08
0.211059	-4.69889e-11	-1.87996e-11	-1.93763e-11	1.40195e-11	8.93277e-11	2.36029e-10	5.28502e-10	1.00637e-09	1.67765e-09	-1.72729e-10	-2.71682e-10	-3.27231e-10	-3.69933e-11	9.39823e-10	2.59887e-09	4.89534e-09	7.64081e-09	1.08508e-08
0.211309	-4.54456e-11	-2.34295e-11	-1.47465e-11	1.86494e-11	8.62411e-11	2.46832e-10	5.25415e-10	9.94025e-10	1.66993e-09	-1.56035e-10	-2.77773e-10	-3.30235e-10	-3.24817e-11	9.41385e-10	2.61108e-09	4.89984e-09	7.64234e-09	1.08554e-08
0.211559	-3.61859e-11	-1.87996e-11	-1.47465e-11	1.86494e-11	9.0871e-11	2.31399e-10	5.26958e-10	9.94025e-10	1.68537e-09	-1.66611e-10	-2.80787e-10	-3.28738e-10	-4.00435e-11	9.39841e-10	2.59748e-09	4.89076e-09	7.64391e-09	1.08478e-08
0.211809	-5.00755e-11	-3.11459e-11	-7.03006e-12	1.55628e-11	8.62411e-11	2.39116e-10	5.09982e-10	9.97111e-10	1.67456e-09	-1.66647e-10	-2.68622e-10	-3.3019e-10	-3.40159e-11	9.35321e-10	2.60652e-09	4.89669e-09	7.6501e-09	1.08507e-08
0.212059	-4.23591e-11	-2.6516e-11	-5.48678e-12	1.09329e-11	8.93277e-11	2.37572e-10	5.19242e-10	9.81679e-10	1.67456e-09	-1.6209e-10	-2.71672e-10	-3.19587e-10	-3.8573e-11	9.45942e-10	2.60198e-09	4.87854e-09	7.66385e-09	1.08402e-08
0.212309	-4.54456e-11	-2.96026e-11	-1.7833e-11	1.40195e-11	9.24142e-11	2.42202e-10	5.31588e-10	9.77049e-10	1.68382e-09	-1.65122e-10	-2.83864e-10	-3.30208e-10	-4.16141e-11	9.41394e-10	2.59736e-09	4.89678e-09	7.66079e-09	1.08508e-08
0.212559	-3.61859e-11	-2.80593e-11	-3.9435e-12	2.32792e-11	8.31545e-11	2.36029e-10	5.22328e-10	1.00328e-09	1.67302e-09	-1.66675e-10	-2.79343e-10	-3.31788e-10	-3.54955e-11	9.35284e-10	2.59589e-09	4.90595e-09	7.6456e-09	1.08585e-08
0.212809	-3.92725e-11	-1.72563e-11	-1.62898e-11	7.84638e-12	8.77844e-11	2.43745e-10	5.28502e-10	9.90938e-10	1.68382e-09	-1.68191e-10	-2.76257e-10	-3.30226e-10	-2.94043e-11	9.38289e-10	2.60954e-09	4.8908e-09	7.65923e-09	1.08524e-08
0.21306	-5.31621e-11	-3.42325e-11	-1.16599e-11	1.86494e-11	9.0871e-11	2.39116e-10	5.22328e-10	9.92482e-10	1.68228e-09	-1.65186e-10	-2.74704e-10	-3.22637e-10	-3.70024e-11	9.36782e-10	2.59749e-09	4.89834e-09	7.65776e-09	1.0857e-08
0.21331	-5.00755e-11	-2.6516e-11	-1.62898e-11	2.01926e-11	8.46978e-11	2.39116e-10	5.22328e-10	9.81679e-10	1.68382e-09	-1.71295e-10	-2.73125e-10	-3.30153e-10	-3.85548e-11	9.36691e-10	2.60955e-09	4.89838e-09	7.65319e-09	1.08647e-08
0.21356	-4.39024e-11	-2.49728e-11	3.77292e-12	1.71061e-11	8.46978e-11	2.31399e-10	5.28502e-10	9.92482e-10	1.69e-09	-1.7588e-10	-2.65536e-10	-3.19587e-10	-3.55046e-11	9.23093e-10	2.59744e-09	4.89843e-09	7.65625e-09	1.08632e-08
0.21381	-4.39024e-11	-1.57131e-11	-1.16599e-11	2.01926e-11	8.62411e-11	2.40659e-10	5.33131e-10	9.94025e-10	1.68691e-09	-1.71341e-10	-2.73088e-10	-3.30199e-10	-3.39522e-11	9.44308e-10	2.60044e-09	4.906e-09	7.66233e-09	1.08648e-08
0.21406	-4.85322e-11	-2.6516e-11	-8.57335e-12	2.17359e-11	8.31545e-11	2.37572e-10	5.30045e-10	9.90938e-10	1.67919e-09	-1.72811e-10	-2.68568e-10	-3.30235e-10	-3.24272e-11	9.35275e-10	2.60503e-09	4.89696e-09	7.6563e-09	1.08724e-08
0.21431	-4.54456e-11	-2.49728e-11	-8.57335e-12	1.86494e-11	8.62411e-11	2.37572e-10	5.23872e-10	9.92482e-10	1.68382e-09	-1.68145e-10	-2.70038e-10	-3.25651e-10	-3.39613e-11	9.3375e-10	2.60352e-09	4.90761e-09	7.66237e-09	1.08679e-08
0.21456	-4.39024e-11	-2.34295e-11	-1.16599e-11	1.55628e-11	8.16113e-11	2.36029e-10	5.20785e-10	9.94025e-10	1.68845e-09	-1.51569e-10	-2.65572e-10	-3.24108e-10	-3.70206e-11	9.42828e-10	2.602e-09	4.91372e-09	7.66243e-09	1.08724e-08
0.21481	-5.62486e-11	-2.03429e-11	-1.93763e-11	2.48225e-11	8.62411e-11	2.31399e-10	5.19242e-10	9.92482e-10	1.67919e-09	-1.89496e-10	-2.82239e-10	-3.25678e-10	-3.70479e-11	9.32234e-10	2.60506e-09	4.9046e-09	7.66699e-09	1.08739e-08
0.21506	-4.23591e-11	-2.80593e-11	-1.32032e-11	1.40195e-11	8.77844e-11	2.39116e-10	5.23872e-10	9.97111e-10	1.68537e-09	-1.72911e-10	-2.68641e-10	-3.34811e-10	-3.85002e-11	9.368e-10	2.60809e-09	4.90304e-09	7.66402e-09	1.08648e-08
0.21531	-3.61859e-11	-1.72563e-11	-1.32032e-11	7.84638e-12	8.62411e-11	2.39116e-10	5.26958e-10	1.0002e-09	1.68074e-09	-1.66729e-10	-2.73143e-10	-3.30299e-10	-2.63996e-11	9.45905e-10	2.60203e-09	4.90607e-09	7.6731e-09	1.0877e-08
0.21556	-4.54456e-11	-2.34295e-11	-1.93763e-11	1.55628e-11	8.31545e-11	2.31399e-10	5.19242e-10	9.95568e-10	1.67919e-09	-1.69716e-10	-2.74704e-10	-3.31679e-10	-4.14139e-11	9.33805e-10	2.60503e-09	4.90464e-09	7.66566e-09	1.08817e-08
0.21581	-4.54456e-11	-3.11459e-11	-1.01166e-11	2.63658e-11	8.93277e-11	2.29856e-10	5.20785e-10	9.90938e-10	1.68382e-09	-1.65177e-10	-2.76266e-10	-3.11916e-10	-1.42444e-11	9.41312e-10	2.60197e-09	4.91677e-09	7.68688e-09	1.08863e-08
0.21606	-5.00755e-11	-2.03429e-11	-1.01166e-11	2.01926e-11	8.62411e-11	2.48375e-10	5.23872e-10	9.78592e-10	1.68691e-09	-1.68181e-10	-2.80778e-10	-3.20994e-10	-4.60346e-11	9.33705e-10	2.5974e-09	4.90766e-09	7.67182e-09	1.0894e-08
0.21631	-3.61859e-11	-3.11459e-11	-1.7833e-11	1.09329e-11	8.16113e-11	2.49919e-10	5.33131e-10	9.78592e-10	1.68537e-09	-1.6514e-10	-2.68686e-10	-3.28656e-10	-3.40614e-11	9.2912e-10	2.60197e-09	4.90158e-09	7.68241e-09	1.08956e-08
0.21656	-4.85322e-11	-1.57131e-11	-1.47465e-11	1.40195e-11	8.62411e-11	2.28313e-10	5.22328e-10	9.89395e-10	1.69e-09	-1.63615e-10	-2.82321e-10	-3.25624e-10	-4.00435e-11	9.35175e-10	2.60507e-09	4.91376e-09	7.68396e-09	1.09001e-08
0.216811	-5.31621e-11	-2.6516e-11	-7.03006e-12	2.48225e-11	9.0871e-11	2.32942e-10	5.30045e-10	9.87852e-10	1.68382e-09	-1.66747e-10	-2.79289e-10	-3.21067e-10	-3.24817e-11	9.32189e-10	2.60966e-09	4.91689e-09	7.6779e-09	1.0888e-08
0.217061	-4.69889e-11	-2.49728e-11	-8.57335e-12	1.09329e-11	9.70441e-11	2.34486e-10	5.19242e-10	9.95568e-10	1.68845e-09	-1.81907e-10	-2.68659e-10	-3.27094e-10	-3.69842e-11	9.36737e-10	2.60818e-09	4.91841e-09	7.68242e-09	1.08925e-08
0.217311	-4.69889e-11	-2.80593e-11	-1.62898e-11	1.40195e-11	8.62411e-11	2.48375e-10	5.26958e-10	9.92482e-10	1.69e-09	-1.63743e-10	-2.7928e-10	-3.19578e-10	-3.24544e-11	9.35239e-10	2.61128e-09	4.91387e-09	7.67937e-09	1.0891e-08
0.217561	-3.61859e-11	-2.6516e-11	-1.01166e-11	2.01926e-11	8.46978e-11	2.48375e-10	5.28502e-10	9.95568e-10	1.68845e-09	-1.71268e-10	-2.80823e-10	-3.31642e-10	-3.54864e-11	9.35248e-10	2.62194e-09	4.91839e-09	7.67474e-09	1.08956e-08
0.217811	-4.39024e-11	-2.96026e-11	-1.93763e-11	1.09329e-11	8.16113e-11	2.43745e-10	5.26958e-10	9.83222e-10	1.68382e-09	-1.72802e-10	-2.73261e-10	-3.16528e-10	-3.70206e-11	9.3838e-10	2.61588e-09	4.91381e-09	7.66868e-09	1.09017e-08
0.218061	-4.39024e-11	-2.18862e-11	-5.48678e-12	6.30309e-12	9.0871e-11	2.40659e-10	5.23872e-10	9.92482e-10	1.7008e-09	-1.66702e-10	-2.82339e-10	-3.27067e-10	-3.55046e-11	9.52024e-10	2.61274e-09	4.90922e-09	7.67939e-09	1.09033e-08
0.218311	-3.77292e-11	-1.41698e-11	-1.62898e-11	7.84638e-12	8.46978e-11	2.42202e-10	5.30045e-10	9.95568e-10	1.68074e-09	-1.65195e-10	-2.77764e-10	-3.19514e-10	-3.55319e-11	9.35275e-10	2.60359e-09	4.91084e-09	7.69157e-09	1.09079e-08
0.218561	-4.54456e-11	-2.6516e-11	-1.47465e-11	1.40195e-11	8.31545e-11	2.48375e-10	5.25415e-10	9.98655e-10	1.69463e-09	-1.74318e-10	-2.68613e-10	-3.21058e-10	-4.15777e-11	9.26152e-10	2.60657e-09	4.9306e-09	7.67794e-09	1.09003e-08
0.218811	-4.54456e-11	-2.49728e-11	-2.40021e-12	2.79091e-11	9.39575e-11	2.43745e-10	5.14612e-10	9.95568e-10	1.69e-09	-1.7135e-10	-2.7317e-10	-3.31679e-10	-3.24726e-11	9.47449e-10	2.60355e-09	4.9185e-09	7.6809e-09	1.09064e-08
0.219061	-4.08158e-11	-2.80593e-11	-1.47465e-11	9.38966e-12	7.54381e-11	2.43745e-10	5.23872e-10	9.94025e-10	1.7008e-09	-1.7588e-10	-2.79207e-10	-3.2113e-10	-3.39795e-11	9.47558e-10	2.60504e-09	4.91545e-09	7.68097e-09	1.09079e-08
0.219311	-3.61859e-11	-2.96026e-11	-1.47465e-11	1.86494e-11	8.93277e-11	2.42202e-10	5.26958e-10	1.00483e-09	1.68691e-09	-1.7135e-10	-2.64029e-10	-3.31688e-10	-4.00162e-11	9.44462e-10	2.6036e-09	4.92758e-09	7.68862e-09	1.09033e-08
0.219561	-4.08158e-11	-2.80593e-11	-3.9435e-12	2.01926e-11	8.77844e-11	2.37572e-10	5.31588e-10	9.86308e-10	1.68382e-09	-1.74382e-10	-2.70029e-10	-3.22592e-10	-2.78883e-11	9.36855e-10	2.61576e-09	4.91854e-09	7.69323e-09	1.09064e-08
0.219811	-3.46427e-11	-2.34295e-11	-1.62898e-11	2.32792e-11	8.31545e-11	2.34486e-10	5.36218e-10	1.00174e-09	1.69154e-09	-1.75898e-10	-2.68568e-10	-3.21067e-10	-3.39249e-11	9.42919e-10	2.60972e-09	4.92461e-09	7.69167e-09	1.09078e-08
0.220061	-3.92725e-11	-3.26892e-11	-1.62898e-11	1.71061e-11	9.55008e-11	2.46832e-10	5.22328e-10	9.92482e-10	1.70543e-09	-1.71332e-10	-2.73097e-10	-3.30199e-10	-3.54955e-11	9.44417e-10	2.60819e-09	4.92924e-09	7.68104e-09	1.08958e-08
0.220312	-3.92725e-11	-1.87996e-11	-1.47465e-11	2.48225e-11	8.62411e-11	2.48375e-10	5.28502e-10	9.90938e-10	1.7116e-09	-1.7135e-10	-2.67015e-10	-3.28728e-10	-3.70479e-11	9.33814e-10	2.61275e-09	4.93226e-09	7.69014e-09	1.09155e-08
0.220562	-3.92725e-11	-1.87996e-11	-1.32032e-11	1.71061e-11	8.62411e-11	2.40659e-10	5.25415e-10	9.98655e-10	1.70234e-09	-1.78957e-10	-2.65499e-10	-3.28674e-10	-4.01072e-11	9.44489e-10	2.61278e-09	4.92313e-09	7.69174e-09	1.0911e-08
0.220812	-4.54456e-11	-2.80593e-11	-3.9435e-12	2.32792e-11	8.46978e-11	2.42202e-10	5.20785e-10	1.0002e-09	1.69154e-09	-1.75925e-10	-2.73088e-10	-3.21094e-10	-4.01163e-11	9.55156e-10	2.61281e-09	4.92309e-09	7.6963e-09	1.09065e-08
0.221062	-4.39024e-11	-2.34295e-11	-1.7833e-11	2.32792e-11	7.69814e-11	2.42202e-10	5.30045e-10	1.00174e-09	1.69154e-09	-1.71368e-10	-2.68559e-10	-3.2861e-10	-3.8573e-11	9.43055e-10	2.61738e-09	4.92614e-09	7.69181e-09	1.09232e-08
0.221312	-4.08158e-11	-3.26892e-11	-8.57335e-12	1.55628e-11	8.62411e-11	2.43745e-10	5.36218e-10	9.98655e-10	1.68845e-09	-1.77405e-10	-2.6855e-10	-3.17953e-10	-3.55228e-11	9.49037e-10	2.6174e-09	4.9262e-09	7.70091e-09	1.09142e-08
0.221562	-4.69889e-11	-2.96026e-11	-1.32032e-11	1.86494e-11	8.93277e-11	2.37572e-10	5.25415e-10	9.95568e-10	1.69308e-09	-1.71314e-10	-2.71527e-10	-3.13341e-10	-3.7057e-11	9.41421e-10	2.61584e-09	4.93232e-09	7.69792e-09	1.09172e-08
0.221812	-4.08158e-11	-2.6516e-11	-1.32032e-11	1.86494e-11	8.77844e-11	2.42202e-10	5.28502e-10	1.0002e-09	1.69e-09	-1.66747e-10	-2.59426e-10	-3.17844e-10	-4.16141e-11	9.36846e-10	2.6098e-09	4.93538e-09	7.69791e-09	1.09233e-08
0.222062	-3.92725e-11	-2.34295e-11	-1.32032e-11	1.40195e-11	8.93277e-11	2.39116e-10	5.31588e-10	1.00174e-09	1.70389e-09	-1.74309e-10	-2.73088e-10	-3.10355e-10	-3.70479e-11	9.44417e-10	2.62191e-09	4.93079e-09	7.6994e-09	1.09203e-08
0.222312	-4.23591e-11	-2.96026e-11	-1.62898e-11	2.63658e-11	8.77844e-11	2.31399e-10	5.20785e-10	9.87852e-10	1.68845e-09	-1.68336e-10	-2.74732e-10	-3.28556e-10	-3.39613e-11	9.39896e-10	2.61281e-09	4.92628e-09	7.69335e-09	1.09234e-08
0.222562	-3.92725e-11	-2.96026e-11	-1.32032e-11	1.86494e-11	9.0871e-11	2.46832e-10	5.31588e-10	1.00637e-09	1.70852e-09	-1.82016e-10	-2.80768e-10	-3.19496e-10	-3.24544e-11	9.41403e-10	2.60818e-09	4.94139e-09	7.70096e-09	1.09279e-08
0.222812	-4.08158e-11	-2.49728e-11	-8.57335e-12	1.55628e-11	8.62411e-11	2.39116e-10	5.37761e-10	9.97111e-10	1.70389e-09	-1.80573e-10	-2.68613e-10	-3.16419e-10	-3.85912e-11	9.4291e-10	2.60818e-09	4.92321e-09	7.70409e-09	1.09234e-08
0.223062	-3.77292e-11	-2.6516e-11	-1.93763e-11	1.86494e-11	8.77844e-11	2.39116e-10	5.23872e-10	1.00328e-09	1.70543e-09	-1.80537e-10	-2.70056e-10	-3.20957e-10	-4.61711e-11	9.38344e-10	2.61281e-09	4.92769e-09	7.71021e-09	1.09173e-08
0.223312	-4.23591e-11	-2.18862e-11	-1.01166e-11	1.86494e-11	9.24142e-11	2.39116e-10	5.22328e-10	9.98655e-10	1.69926e-09	-1.7598e-10	-2.68568e-10	-3.17916e-10	-3.25181e-11	9.38298e-10	2.62197e-09	4.92927e-09	7.71013e-09	1.09355e-08
0.223562	-4.69889e-11	-2.18862e-11	-8.57335e-12	2.32792e-11	8.46978e-11	2.42202e-10	5.25415e-10	9.97111e-10	1.7008e-09	-1.79021e-10	-2.73097e-10	-3.14894e-10	-3.70388e-11	9.35321e-10	2.62052e-09	4.93389e-09	7.69192e-09	1.09266e-08
0.223813	-4.39024e-11	-2.96026e-11	-8.57335e-12	1.71061e-11	8.77844e-11	2.46832e-10	5.23872e-10	9.97111e-10	1.69926e-09	-1.82044e-10	-2.67061e-10	-3.22501e-10	-4.15777e-11	9.4744e-10	2.62342e-09	4.93995e-09	7.70709e-09	1.09417e-08
0.224063	-4.08158e-11	-2.6516e-11	-1.32032e-11	1.24762e-11	7.08083e-11	2.40659e-10	5.31588e-10	9.95568e-10	1.70697e-09	-1.74437e-10	-2.7307e-10	-3.22537e-10	-3.09749e-11	9.36919e-10	2.5992e-09	4.92938e-09	7.71169e-09	1.09311e-08
0.224313	-4.23591e-11	-1.87996e-11	-1.32032e-11	1.40195e-11	8.62411e-11	2.42202e-10	5.31588e-10	9.89395e-10	1.69926e-09	-1.74437e-10	-2.63983e-10	-3.2103e-10	-3.85457e-11	9.50563e-10	2.6265e-09	4.94149e-09	7.69958e-09	1.0919e-08
0.224563	-3.46427e-11	-2.18862e-11	-1.62898e-11	1.55628e-11	8.0068e-11	2.40659e-10	5.25415e-10	9.95568e-10	1.67919e-09	-1.82026e-10	-2.68513e-10	-3.24017e-10	-4.00617e-11	9.47594e-10	2.62669e-09	4.93699e-09	7.71015e-09	1.09447e-08
0.224813	-5.00755e-11	-2.49728e-11	-2.24629e-11	1.40195e-11	8.62411e-11	2.36029e-10	5.20785e-10	9.98655e-10	1.68845e-09	-1.75934e-10	-2.7012e-10	-3.14875e-10	-3.0984e-11	9.47549e-10	2.62965e-09	4.93701e-09	7.70573e-09	1.09312e-08
0.225063	-4.54456e-11	-2.03429e-11	-1.62898e-11	1.40195e-11	8.31545e-11	2.37572e-10	5.25415e-10	1.00483e-09	1.70234e-09	-1.69779e-10	-2.79262e-10	-3.13359e-10	-4.16232e-11	9.42946e-10	2.61597e-09	4.94466e-09	7.7209e-09	1.09434e-08
0.225313	-4.85322e-11	-3.42325e-11	-5.48678e-12	1.86494e-11	8.62411e-11	2.42202e-10	5.30045e-10	9.98655e-10	1.69926e-09	-1.66738e-10	-2.76239e-10	-3.2398e-10	-4.46551e-11	9.38344e-10	2.62046e-09	4.94927e-09	7.71183e-09	1.09496e-08
0.225563	-4.39024e-11	-2.18862e-11	-1.93763e-11	1.71061e-11	8.62411e-11	2.40659e-10	5.26958e-10	1.0002e-09	1.70389e-09	-1.74282e-10	-2.71636e-10	-3.164e-10	-3.09658e-11	9.38335e-10	2.61897e-09	4.94777e-09	7.71027e-09	1.09481e-08
0.225813	-3.30994e-11	-2.80593e-11	-1.16599e-11	1.40195e-11	7.38949e-11	2.48375e-10	5.26958e-10	1.01254e-09	1.71006e-09	-1.63715e-10	-2.70084e-10	-3.13296e-10	-3.39977e-11	9.4143e-10	2.62044e-09	4.9462e-09	7.7133e-09	1.09526e-08
0.226063	-3.61859e-11	-1.26265e-11	-1.32032e-11	2.32792e-11	8.77844e-11	2.46832e-10	5.28502e-10	1.00328e-09	1.70543e-09	-1.74318e-10	-2.70029e-10	-3.11789e-10	-4.46187e-11	9.49056e-10	2.61289e-09	4.94007e-09	7.71193e-09	1.09435e-08
0.226313	-4.69889e-11	-3.7319e-11	-1.32032e-11	2.17359e-11	8.62411e-11	2.39116e-10	5.26958e-10	1.00637e-09	1.68691e-09	-1.72811e-10	-2.62467e-10	-3.17898e-10	-3.25272e-11	9.46106e-10	2.62353e-09	4.93702e-09	7.73471e-09	1.0948e-08
0.226563	-4.23591e-11	-2.34295e-11	-1.16599e-11	1.86494e-11	9.0871e-11	2.36029e-10	5.22328e-10	9.90938e-10	1.70697e-09	-1.65222e-10	-2.73125e-10	-3.21003e-10	-4.00708e-11	9.55129e-10	2.62513e-09	4.94314e-09	7.71965e-09	1.09496e-08
0.226813	-4.39024e-11	-2.49728e-11	-2.09196e-11	1.86494e-11	7.85247e-11	2.43745e-10	5.28502e-10	9.92482e-10	1.7008e-09	-1.72775e-10	-2.77764e-10	-3.24008e-10	-3.8573e-11	9.36919e-10	2.62667e-09	4.94927e-09	7.72873e-09	1.09588e-08
0.227063	-5.62486e-11	-2.80593e-11	-1.62898e-11	2.17359e-11	7.38949e-11	2.42202e-10	5.26958e-10	1.00483e-09	1.69617e-09	-1.68254e-10	-2.77773e-10	-3.13378e-10	-3.55228e-11	9.42901e-10	2.62823e-09	4.94927e-09	7.73185e-09	1.09573e-08
0.227313	-4.85322e-11	-2.34295e-11	-8.57335e-12	2.17359e-11	9.0871e-11	2.42202e-10	5.31588e-10	1.00791e-09	1.71315e-09	-1.69798e-10	-2.74704e-10	-3.17907e-10	-3.69842e-11	9.41448e-10	2.63275e-09	4.94319e-09	7.73488e-09	1.09528e-08
0.227564	-3.77292e-11	-2.80593e-11	-1.93763e-11	2.17359e-11	8.93277e-11	2.37572e-10	5.36218e-10	1.00946e-09	1.71315e-09	-1.77277e-10	-2.71509e-10	-3.21012e-10	-2.9377e-11	9.47531e-10	2.62213e-09	4.94625e-09	7.7288e-09	1.09604e-08
0.227814	-4.39024e-11	-2.6516e-11	-1.01166e-11	1.09329e-11	8.31545e-11	2.45289e-10	5.36218e-10	9.95568e-10	1.7008e-09	-1.51551e-10	-2.50385e-10	-3.2556e-10	-3.09203e-11	9.46069e-10	2.62666e-09	4.95391e-09	7.72875e-09	1.09665e-08
0.228064	-3.77292e-11	-2.18862e-11	-7.03006e-12	2.17359e-11	8.93277e-11	2.46832e-10	5.34675e-10	1.00946e-09	1.7008e-09	-1.77296e-10	-2.91371e-10	-3.17953e-10	-4.15504e-11	9.50581e-10	2.62971e-09	4.95697e-09	7.72728e-09	1.09681e-08
0.228314	-4.23591e-11	-2.49728e-11	-1.01166e-11	1.24762e-11	8.77844e-11	2.37572e-10	5.28502e-10	9.98655e-10	1.7008e-09	-1.72875e-10	-2.80868e-10	-3.16382e-10	-3.24999e-11	9.41476e-10	2.62515e-09	4.9509e-09	7.73648e-09	1.0959e-08
0.228564	-3.77292e-11	-1.72563e-11	-7.03006e-12	1.86494e-11	8.46978e-11	2.48375e-10	5.30045e-10	1.00483e-09	1.68691e-09	-1.72811e-10	-2.68604e-10	-3.16364e-10	-3.85275e-11	9.44471e-10	2.62512e-09	4.95237e-09	7.74562e-09	1.09696e-08
0.228814	-4.69889e-11	-2.6516e-11	-8.57335e-12	1.40195e-11	8.62411e-11	2.51462e-10	5.36218e-10	9.92482e-10	1.68845e-09	-1.66738e-10	-2.68568e-10	-3.14894e-10	-3.54409e-11	9.44526e-10	2.62363e-09	4.94939e-09	7.73506e-09	1.09711e-08
0.229064	-4.85322e-11	-2.18862e-11	-2.40021e-12	1.55628e-11	8.77844e-11	2.45289e-10	5.47021e-10	9.98655e-10	1.7116e-09	-1.71259e-10	-2.74659e-10	-3.24026e-10	-2.33585e-11	9.50654e-10	2.62962e-09	4.96001e-09	7.74409e-09	1.09605e-08
0.229314	-4.39024e-11	-2.6516e-11	-1.32032e-11	2.01926e-11	8.16113e-11	2.40659e-10	5.30045e-10	1.00483e-09	1.69617e-09	-1.68236e-10	-2.73188e-10	-3.22546e-10	-4.60528e-11	9.5522e-10	2.61301e-09	4.95396e-09	7.73499e-09	1.09711e-08
0.229564	-4.54456e-11	-2.34295e-11	-1.47465e-11	1.71061e-11	8.62411e-11	2.49919e-10	5.39304e-10	1.00483e-09	1.7116e-09	-1.68227e-10	-2.76239e-10	-3.21003e-10	-2.79884e-11	9.47622e-10	2.63427e-09	4.95094e-09	7.73494e-09	1.09636e-08
0.229814	-4.39024e-11	-2.03429e-11	-1.16599e-11	1.55628e-11	9.24142e-11	2.40659e-10	5.30045e-10	9.98655e-10	1.71006e-09	-1.69752e-10	-2.77818e-10	-3.19469e-10	-4.45732e-11	9.47576e-10	2.63586e-09	4.96164e-09	7.73496e-09	1.09666e-08
0.230064	-4.85322e-11	-1.87996e-11	-1.47465e-11	1.71061e-11	8.62411e-11	2.45289e-10	5.34675e-10	1.01254e-09	1.69154e-09	-1.6977e-10	-2.83864e-10	-3.19505e-10	-3.09749e-11	9.47531e-10	2.62529e-09	4.96929e-09	7.73964e-09	1.09804e-08
0.230314	-4.23591e-11	-2.18862e-11	-1.01166e-11	1.40195e-11	9.39575e-11	2.46832e-10	5.31588e-10	1.01409e-09	1.70852e-09	-1.71286e-10	-2.73225e-10	-3.27067e-10	-3.545e-11	9.39978e-10	2.64194e-09	4.96323e-09	7.75633e-09	1.09773e-08
0.230564	-4.54456e-11	-2.49728e-11	-1.01166e-11	1.86494e-11	8.77844e-11	2.46832e-10	5.34675e-10	1.00483e-09	1.7008e-09	-1.69761e-10	-2.73134e-10	-3.16455e-10	-3.24363e-11	9.52069e-10	2.63136e-09	4.96167e-09	7.73821e-09	1.09606e-08
0.230814	-4.23591e-11	-2.03429e-11	-1.32032e-11	2.01926e-11	9.0871e-11	2.42202e-10	5.39304e-10	1.011e-09	1.69926e-09	-1.68263e-10	-2.68604e-10	-3.19469e-10	-3.39431e-11	9.41521e-10	2.63129e-09	4.96317e-09	7.75024e-09	1.09818e-08
0.231065	-4.39024e-11	-2.49728e-11	-8.57335e-12	1.86494e-11	9.0871e-11	2.42202e-10	5.34675e-10	1.00328e-09	1.70852e-09	-1.74327e-10	-2.76193e-10	-3.24117e-10	-3.39704e-11	9.50544e-10	2.62979e-09	4.96016e-09	7.74125e-09	1.09759e-08
0.231315	-3.61859e-11	-1.87996e-11	-3.9435e-12	1.24762e-11	8.46978e-11	2.45289e-10	5.33131e-10	1.00946e-09	1.69926e-09	-1.6977e-10	-2.74677e-10	-3.33167e-10	-3.70115e-11	9.39932e-10	2.63438e-09	4.96468e-09	7.75491e-09	1.0985e-08
0.231565	-4.54456e-11	-2.34295e-11	-1.01166e-11	9.38966e-12	8.77844e-11	2.40659e-10	5.26958e-10	1.01563e-09	1.70543e-09	-1.66729e-10	-2.68577e-10	-3.11898e-10	-3.55046e-11	9.41458e-10	2.63745e-09	4.95862e-09	7.75341e-09	1.09866e-08
0.231815	-5.62486e-11	-2.34295e-11	-7.03006e-12	2.17359e-11	8.46978e-11	2.31399e-10	5.39304e-10	1.00174e-09	1.7116e-09	-1.72784e-10	-2.70093e-10	-3.16364e-10	-3.545e-11	9.52106e-10	2.63743e-09	4.9601e-09	7.74433e-09	1.09805e-08
0.232065	-3.77292e-11	-2.18862e-11	-1.16599e-11	2.32792e-11	9.70441e-11	2.36029e-10	5.33131e-10	1.0002e-09	1.71469e-09	-1.68254e-10	-2.74659e-10	-3.19451e-10	-2.78974e-11	9.46097e-10	2.6298e-09	4.96013e-09	7.75798e-09	1.09789e-08
0.232315	-5.31621e-11	-3.11459e-11	-2.09196e-11	1.09329e-11	7.69814e-11	2.34486e-10	5.37761e-10	1.00483e-09	1.71315e-09	-1.6977e-10	-2.71636e-10	-3.20994e-10	-4.00162e-11	9.50626e-10	2.62976e-09	4.96316e-09	7.75349e-09	1.0979e-08
0.232565	-4.69889e-11	-2.03429e-11	-1.47465e-11	1.86494e-11	8.31545e-11	2.39116e-10	5.31588e-10	1.0002e-09	1.69926e-09	-1.72839e-10	-2.71618e-10	-3.20939e-10	-3.39977e-11	9.49128e-10	2.63128e-09	4.96015e-09	7.75496e-09	1.0985e-08
0.232815	-4.54456e-11	-2.96026e-11	-1.47465e-11	1.09329e-11	8.31545e-11	2.46832e-10	5.30045e-10	1.00174e-09	1.71315e-09	-1.74391e-10	-2.716e-10	-3.10309e-10	-3.54409e-11	9.49165e-10	2.62977e-09	4.96315e-09	7.75044e-09	1.09835e-08
0.233065	-3.92725e-11	-1.87996e-11	-1.7833e-11	1.55628e-11	8.93277e-11	2.48375e-10	5.31588e-10	1.00791e-09	1.7008e-09	-1.75862e-10	-2.68522e-10	-3.17871e-10	-2.7861e-11	9.56763e-10	2.63129e-09	4.95713e-09	7.75803e-09	1.09744e-08
0.233315	-4.23591e-11	-2.18862e-11	-1.01166e-11	1.71061e-11	8.0068e-11	2.39116e-10	5.25415e-10	9.94025e-10	1.71623e-09	-1.65222e-10	-2.63929e-10	-3.17926e-10	-3.39067e-11	9.5226e-10	2.63133e-09	4.96775e-09	7.75654e-09	1.09911e-08
0.233565	-3.61859e-11	-2.49728e-11	-8.57335e-12	1.71061e-11	8.62411e-11	2.49919e-10	5.37761e-10	1.00174e-09	1.71315e-09	-1.69752e-10	-2.63965e-10	-3.19432e-10	-3.24453e-11	9.56772e-10	2.63745e-09	4.96478e-09	7.75508e-09	1.09806e-08
0.233815	-3.77292e-11	-2.80593e-11	-1.32032e-11	1.40195e-11	8.93277e-11	2.46832e-10	5.28502e-10	1.01254e-09	1.71623e-09	-1.72784e-10	-2.74595e-10	-3.16391e-10	-3.70024e-11	9.5069e-10	2.6405e-09	4.96782e-09	7.76726e-09	1.09989e-08
0.234065	-4.54456e-11	-2.49728e-11	-1.01166e-11	1.40195e-11	8.0068e-11	2.42202e-10	5.39304e-10	1.00637e-09	1.70234e-09	-1.65186e-10	-2.66988e-10	-3.16419e-10	-3.545e-11	9.49101e-10	2.63444e-09	4.96937e-09	7.76428e-09	1.0999e-08
0.234315	-5.00755e-11	-2.34295e-11	-1.62898e-11	1.40195e-11	9.24142e-11	2.43745e-10	5.33131e-10	1.00637e-09	1.7116e-09	-1.66702e-10	-2.59426e-10	-3.24053e-10	-2.6345e-11	9.44517e-10	2.63746e-09	4.97085e-09	7.76424e-09	1.1005e-08
0.234566	-4.54456e-11	-1.57131e-11	-1.7833e-11	1.24762e-11	8.0068e-11	2.49919e-10	5.31588e-10	1.00791e-09	1.71006e-09	-1.72766e-10	-2.77664e-10	-3.25624e-10	-3.54955e-11	9.44526e-10	2.63903e-09	4.96176e-09	7.76122e-09	1.09929e-08
0.234816	-4.54456e-11	-2.34295e-11	-1.01166e-11	1.55628e-11	9.24142e-11	2.51462e-10	5.25415e-10	1.011e-09	1.72549e-09	-1.65159e-10	-2.74723e-10	-3.25587e-10	-4.46551e-11	9.5059e-10	2.64361e-09	4.96925e-09	7.76576e-09	1.0996e-08
0.235066	-4.54456e-11	-2.34295e-11	-1.01166e-11	1.55628e-11	8.93277e-11	2.36029e-10	5.30045e-10	1.00637e-09	1.71778e-09	-1.62072e-10	-2.74704e-10	-3.17926e-10	-3.70206e-11	9.44571e-10	2.64207e-09	4.95717e-09	7.76274e-09	1.10097e-08
0.235316	-4.85322e-11	-2.6516e-11	-1.16599e-11	1.86494e-11	9.55008e-11	2.48375e-10	5.30045e-10	1.00637e-09	1.72086e-09	-1.63615e-10	-2.7465e-10	-3.11862e-10	-2.63268e-11	9.52097e-10	2.63445e-09	4.96928e-09	7.76425e-09	1.10144e-08
0.235566	-4.69889e-11	-2.03429e-11	-5.48678e-12	1.40195e-11	8.77844e-11	2.43745e-10	5.26958e-10	1.01254e-09	1.71006e-09	-1.69716e-10	-2.65518e-10	-3.25515e-10	-3.08475e-11	9.41476e-10	2.63744e-09	4.96634e-09	7.76427e-09	1.10144e-08
0.235816	-4.85322e-11	-2.49728e-11	-1.62898e-11	2.01926e-11	9.39575e-11	2.39116e-10	5.36218e-10	1.00174e-09	1.71932e-09	-1.68254e-10	-2.68522e-10	-3.19478e-10	-3.24999e-11	9.43001e-10	2.63444e-09	4.97231e-09	7.76582e-09	1.10144e-08
0.236066	-4.54456e-11	-2.03429e-11	-1.62898e-11	1.71061e-11	8.93277e-11	2.43745e-10	5.33131e-10	1.01563e-09	1.72395e-09	-1.72766e-10	-2.70111e-10	-3.1641e-10	-4.92031e-11	9.53649e-10	2.64044e-09	4.95415e-09	7.77036e-09	1.10068e-08
0.236316	-4.54456e-11	-2.34295e-11	-1.32032e-11	1.71061e-11	8.93277e-11	2.48375e-10	5.31588e-10	1.00328e-09	1.71778e-09	-1.63634e-10	-2.77746e-10	-3.19405e-10	-3.55865e-11	9.4764e-10	2.62681e-09	4.97081e-09	7.7628e-09	1.10205e-08
0.236566	-5.47053e-11	-2.80593e-11	-1.01166e-11	1.86494e-11	9.24142e-11	2.45289e-10	5.37761e-10	1.00328e-09	1.71932e-09	-1.62063e-10	-2.77727e-10	-3.13368e-10	-3.70661e-11	9.52115e-10	2.63745e-09	4.96943e-09	7.76872e-09	1.10144e-08
0.236816	-4.54456e-11	-1.57131e-11	-1.01166e-11	9.38966e-12	8.93277e-11	2.51462e-10	5.31588e-10	1.01872e-09	1.71623e-09	-1.63606e-10	-2.67034e-10	-3.2093e-10	-4.31755e-11	9.41503e-10	2.64525e-09	4.97702e-09	7.74606e-09	1.10039e-08
0.237066	-4.69889e-11	-2.03429e-11	-1.32032e-11	1.71061e-11	7.54381e-11	2.46832e-10	5.33131e-10	1.00946e-09	1.72395e-09	-1.68154e-10	-2.63974e-10	-3.16437e-10	-4.32301e-11	9.47503e-10	2.66335e-09	4.97247e-09	7.77638e-09	1.10342e-08
0.237316	-4.85322e-11	-2.96026e-11	-1.16599e-11	1.55628e-11	8.0068e-11	2.48375e-10	5.30045e-10	1.00791e-09	1.71623e-09	-1.62154e-10	-2.73079e-10	-3.22546e-10	-4.61984e-11	9.41512e-10	2.62238e-09	4.96941e-09	7.76895e-09	1.10116e-08
0.237566	-4.23591e-11	-2.49728e-11	-1.32032e-11	2.17359e-11	8.31545e-11	2.48375e-10	5.40848e-10	1.01717e-09	1.71932e-09	-1.74282e-10	-2.68577e-10	-3.2861e-10	-3.25181e-11	9.53649e-10	2.63892e-09	4.9725e-09	7.77198e-09	1.10282e-08
0.237816	-5.00755e-11	-1.87996e-11	-1.47465e-11	1.86494e-11	8.62411e-11	2.49919e-10	5.37761e-10	1.00483e-09	1.71623e-09	-1.68227e-10	-2.71609e-10	-3.16464e-10	-3.69933e-11	9.49101e-10	2.64057e-09	4.98162e-09	7.775e-09	1.10268e-08
0.238066	-5.31621e-11	-2.96026e-11	-1.62898e-11	2.48225e-11	8.46978e-11	2.46832e-10	5.43934e-10	1.01563e-09	1.72858e-09	-1.63661e-10	-2.73143e-10	-3.19432e-10	-3.40068e-11	9.41439e-10	2.6436e-09	4.9741e-09	7.76749e-09	1.10237e-08
0.238317	-3.92725e-11	-2.80593e-11	-1.16599e-11	1.71061e-11	8.31545e-11	2.39116e-10	5.37761e-10	1.01563e-09	1.72395e-09	-1.7125e-10	-2.716e-10	-3.17907e-10	-4.00435e-11	9.39869e-10	2.63902e-09	4.98313e-09	7.78418e-09	1.10222e-08
0.238567	-5.62486e-11	-1.57131e-11	-7.03006e-12	1.55628e-11	8.77844e-11	2.48375e-10	5.43934e-10	1.02026e-09	1.72704e-09	-1.69734e-10	-2.67006e-10	-3.14875e-10	-3.25454e-11	9.39923e-10	2.63605e-09	4.97102e-09	7.77669e-09	1.10282e-08
0.238817	-4.39024e-11	-2.18862e-11	-1.47465e-11	2.01926e-11	8.93277e-11	2.40659e-10	5.33131e-10	1.01717e-09	1.71778e-09	-1.63652e-10	-2.65481e-10	-3.19432e-10	-4.77417e-11	9.50599e-10	2.65278e-09	4.9755e-09	7.78274e-09	1.10161e-08
0.239067	-4.69889e-11	-2.34295e-11	-1.01166e-11	2.01926e-11	8.77844e-11	2.40659e-10	5.40848e-10	1.00483e-09	1.72858e-09	-1.68136e-10	-2.70047e-10	-3.19451e-10	-4.62894e-11	9.50654e-10	2.64831e-09	4.97252e-09	7.78279e-09	1.10329e-08
0.239317	-4.39024e-11	-2.6516e-11	-1.32032e-11	1.24762e-11	8.93277e-11	2.48375e-10	5.36218e-10	1.00637e-09	1.71932e-09	-1.59004e-10	-2.70138e-10	-3.17916e-10	-4.32574e-11	9.49138e-10	2.64979e-09	4.98011e-09	7.78429e-09	1.10361e-08
0.239567	-4.54456e-11	-2.49728e-11	-8.57335e-12	1.55628e-11	8.62411e-11	2.40659e-10	5.33131e-10	1.01717e-09	1.70852e-09	-1.5746e-10	-2.80778e-10	-3.16364e-10	-4.77508e-11	9.50745e-10	2.64675e-09	4.97708e-09	7.78129e-09	1.10452e-08
0.239817	-4.39024e-11	-2.49728e-11	-1.32032e-11	2.01926e-11	8.62411e-11	2.43745e-10	5.40848e-10	1.01409e-09	1.72704e-09	-1.63588e-10	-2.74777e-10	-3.13332e-10	-3.70752e-11	9.65877e-10	2.64671e-09	4.9725e-09	7.78731e-09	1.10422e-08
0.240067	-5.31621e-11	-2.49728e-11	-1.01166e-11	1.86494e-11	8.62411e-11	2.49919e-10	5.36218e-10	1.00946e-09	1.71932e-09	-1.69707e-10	-2.80814e-10	-3.17898e-10	-3.24272e-11	9.44744e-10	2.64367e-09	4.97403e-09	7.77675e-09	1.10345e-08
0.240317	-3.92725e-11	-2.03429e-11	-1.16599e-11	1.86494e-11	7.85247e-11	2.42202e-10	5.30045e-10	1.011e-09	1.73012e-09	-1.66656e-10	-2.76321e-10	-3.19478e-10	-3.09203e-11	9.65841e-10	2.64522e-09	4.98018e-09	7.79041e-09	1.10376e-08
0.240567	-4.85322e-11	-2.49728e-11	-1.01166e-11	1.55628e-11	8.16113e-11	2.48375e-10	5.34675e-10	1.01409e-09	1.72395e-09	-1.60547e-10	-2.83864e-10	-3.24017e-10	-3.85366e-11	9.44653e-10	2.65284e-09	4.98625e-09	7.7905e-09	1.10422e-08
0.240817	-4.39024e-11	-2.03429e-11	-1.01166e-11	1.24762e-11	9.55008e-11	2.46832e-10	5.26958e-10	1.01717e-09	1.72549e-09	-1.62008e-10	-2.7465e-10	-3.16437e-10	-3.86003e-11	9.5069e-10	2.64983e-09	4.97567e-09	7.79051e-09	1.10514e-08
0.241067	-4.54456e-11	-3.11459e-11	-1.93763e-11	1.55628e-11	8.0068e-11	2.40659e-10	5.37761e-10	1.02335e-09	1.72395e-09	-1.57488e-10	-2.56458e-10	-3.19423e-10	-4.15959e-11	9.61338e-10	2.64829e-09	4.98628e-09	7.79353e-09	1.1053e-08
0.241317	-3.77292e-11	-2.18862e-11	-1.01166e-11	1.40195e-11	8.46978e-11	2.42202e-10	5.31588e-10	1.01563e-09	1.73012e-09	-1.65068e-10	-2.83673e-10	-3.16364e-10	-3.25181e-11	9.50735e-10	2.64981e-09	4.98484e-09	7.78751e-09	1.10576e-08
0.241567	-5.16188e-11	-2.34295e-11	-1.32032e-11	9.38966e-12	9.0871e-11	2.39116e-10	5.28502e-10	1.01563e-09	1.72704e-09	-1.62108e-10	-2.62595e-10	-3.11843e-10	-4.16141e-11	9.52215e-10	2.64982e-09	4.98938e-09	7.79821e-09	1.10561e-08
0.241818	-4.85322e-11	-1.87996e-11	-8.57335e-12	2.01926e-11	8.93277e-11	2.42202e-10	5.33131e-10	1.01872e-09	1.72858e-09	-1.69707e-10	-2.80768e-10	-3.23971e-10	-4.16505e-11	9.55229e-10	2.6498e-09	4.98488e-09	7.80892e-09	1.10545e-08
0.242068	-4.08158e-11	-2.80593e-11	-1.01166e-11	1.40195e-11	8.93277e-11	2.36029e-10	5.34675e-10	1.00791e-09	1.72549e-09	-1.68245e-10	-2.80868e-10	-3.16437e-10	-3.84729e-11	9.47676e-10	2.64673e-09	4.99249e-09	7.80437e-09	1.10499e-08
0.242318	-4.85322e-11	-1.57131e-11	2.22964e-12	1.55628e-11	8.93277e-11	2.48375e-10	5.36218e-10	1.01254e-09	1.72241e-09	-1.71286e-10	-2.79316e-10	-3.19496e-10	-1.72673e-11	9.56745e-10	2.64368e-09	4.99558e-09	7.79676e-09	1.10515e-08
0.242568	-3.92725e-11	-1.72563e-11	-1.01166e-11	1.40195e-11	8.31545e-11	2.48375e-10	5.37761e-10	1.00791e-09	1.70697e-09	-1.7135e-10	-2.74732e-10	-3.28665e-10	-4.45641e-11	9.50681e-10	2.64674e-09	4.99406e-09	7.80431e-09	1.10531e-08
0.242818	-5.00755e-11	-2.49728e-11	-1.16599e-11	1.71061e-11	8.77844e-11	2.48375e-10	5.39304e-10	1.01872e-09	1.71469e-09	-1.78975e-10	-2.74732e-10	-3.28674e-10	-4.01345e-11	9.47594e-10	2.6513e-09	4.99098e-09	7.79976e-09	1.10668e-08
0.243068	-4.54456e-11	-2.80593e-11	-2.40021e-12	1.55628e-11	8.46978e-11	2.39116e-10	5.34675e-10	1.01717e-09	1.72549e-09	-1.78957e-10	-2.79289e-10	-3.21067e-10	-3.70479e-11	9.47631e-10	2.64528e-09	4.98798e-09	7.79671e-09	1.10623e-08
0.243318	-5.00755e-11	-2.49728e-11	-3.9435e-12	1.71061e-11	8.16113e-11	2.37572e-10	5.36218e-10	1.01254e-09	1.72858e-09	-1.68263e-10	-2.76211e-10	-3.24126e-10	-3.54955e-11	9.56745e-10	2.65436e-09	5.00017e-09	7.80127e-09	1.10623e-08
0.243568	-4.85322e-11	-2.6516e-11	-7.03006e-12	1.86494e-11	7.85247e-11	2.45289e-10	5.34675e-10	1.01563e-09	1.72395e-09	-1.65259e-10	-2.67088e-10	-3.33267e-10	-3.39795e-11	9.50726e-10	2.64836e-09	5.00169e-09	7.80131e-09	1.10684e-08
0.243818	-3.77292e-11	-2.80593e-11	-5.48678e-12	2.32792e-11	8.31545e-11	2.37572e-10	5.28502e-10	1.01872e-09	1.72858e-09	-1.83405e-10	-2.74641e-10	-3.28701e-10	-3.7057e-11	9.55238e-10	2.65594e-09	4.98798e-09	7.80286e-09	1.10684e-08
0.244068	-4.85322e-11	-2.18862e-11	-2.40021e-12	1.09329e-11	8.77844e-11	2.49919e-10	5.50107e-10	1.02026e-09	1.71932e-09	-1.60693e-10	-2.71627e-10	-3.21085e-10	-4.31573e-11	9.50699e-10	2.65447e-09	4.98948e-09	7.80743e-09	1.10608e-08
0.244318	-3.77292e-11	-2.49728e-11	-1.32032e-11	1.40195e-11	8.93277e-11	2.46832e-10	5.39304e-10	1.02489e-09	1.72549e-09	-1.69688e-10	-2.70138e-10	-3.27094e-10	-4.01436e-11	9.52206e-10	2.65749e-09	4.99856e-09	7.80446e-09	1.10683e-08
0.244568	-5.00755e-11	-2.80593e-11	-1.47465e-11	1.71061e-11	8.62411e-11	2.40659e-10	5.34675e-10	1.00791e-09	1.72395e-09	-1.6672e-10	-2.79252e-10	-3.19487e-10	-4.0089e-11	9.53695e-10	2.65303e-09	4.98492e-09	7.81356e-09	1.10623e-08
0.244818	-4.39024e-11	-2.03429e-11	-2.40021e-12	2.17359e-11	8.46978e-11	2.40659e-10	5.37761e-10	1.02798e-09	1.72395e-09	-1.71259e-10	-2.74759e-10	-3.16382e-10	-3.40068e-11	9.46106e-10	2.66972e-09	4.98942e-09	7.80903e-09	1.10714e-08
0.245068	-4.85322e-11	-2.18862e-11	-1.32032e-11	2.01926e-11	8.46978e-11	2.42202e-10	5.33131e-10	1.01717e-09	1.72858e-09	-1.68209e-10	-2.79271e-10	-3.14875e-10	-3.70206e-11	9.50626e-10	2.65916e-09	4.99093e-09	7.80761e-09	1.10685e-08
0.245319	-4.23591e-11	-2.18862e-11	-1.01166e-11	2.94523e-11	9.55008e-11	2.42202e-10	5.36218e-10	1.01717e-09	1.73321e-09	-1.6367e-10	-2.73188e-10	-3.20976e-10	-3.7057e-11	9.49156e-10	2.66208e-09	4.98489e-09	7.82885e-09	1.1073e-08
0.245569	-4.54456e-11	-2.18862e-11	-3.9435e-12	7.84638e-12	8.46978e-11	2.45289e-10	5.26958e-10	1.0218e-09	1.72395e-09	-1.72793e-10	-2.71709e-10	-3.22564e-10	-4.0089e-11	9.53695e-10	2.65144e-09	4.99251e-09	7.81226e-09	1.1073e-08
0.245819	-4.08158e-11	-2.18862e-11	-7.03006e-12	1.40195e-11	8.62411e-11	2.43745e-10	5.40848e-10	1.02643e-09	1.73321e-09	-1.72784e-10	-2.85335e-10	-3.27158e-10	-3.70388e-11	9.49128e-10	2.65448e-09	4.99866e-09	7.82129e-09	1.107e-08
0.246069	-4.69889e-11	-2.6516e-11	-3.9435e-12	7.84638e-12	8.31545e-11	2.37572e-10	5.42391e-10	1.011e-09	1.72241e-09	-1.62136e-10	-2.70229e-10	-3.28656e-10	-3.39431e-11	9.46069e-10	2.66362e-09	4.9987e-09	7.81827e-09	1.10746e-08
0.246319	-4.54456e-11	-2.03429e-11	-1.16599e-11	1.55628e-11	8.31545e-11	2.37572e-10	5.39304e-10	1.01717e-09	1.72086e-09	-1.66647e-10	-2.80759e-10	-3.1956e-10	-2.93588e-11	9.49101e-10	2.65759e-09	5.00021e-09	7.81369e-09	1.10762e-08
0.246569	-4.54456e-11	-2.80593e-11	-7.03006e-12	1.40195e-11	8.31545e-11	2.37572e-10	5.33131e-10	1.02798e-09	1.73167e-09	-1.66666e-10	-2.71736e-10	-3.27131e-10	-3.09294e-11	9.49138e-10	2.66061e-09	4.99719e-09	7.81676e-09	1.10837e-08
0.246819	-4.85322e-11	-2.80593e-11	-7.03006e-12	2.01926e-11	9.70441e-11	2.48375e-10	5.36218e-10	1.011e-09	1.72086e-09	-1.6515e-10	-2.8233e-10	-3.27121e-10	-4.31119e-11	9.52115e-10	2.66217e-09	5.00022e-09	7.82435e-09	1.10701e-08
0.247069	-4.23591e-11	-1.87996e-11	-3.9435e-12	2.01926e-11	8.77844e-11	2.46832e-10	5.26958e-10	1.02026e-09	1.72241e-09	-1.66666e-10	-2.77736e-10	-3.17944e-10	-3.85912e-11	9.40023e-10	2.66523e-09	5.00021e-09	7.81527e-09	1.10807e-08
0.247319	-3.92725e-11	-2.03429e-11	-3.9435e-12	2.17359e-11	8.46978e-11	2.39116e-10	5.42391e-10	1.02026e-09	1.73012e-09	-1.66675e-10	-2.64074e-10	-3.13341e-10	-3.55319e-11	9.55165e-10	2.66524e-09	4.99565e-09	7.81974e-09	1.10838e-08
0.247569	-4.39024e-11	-2.03429e-11	-1.01166e-11	1.71061e-11	8.62411e-11	2.42202e-10	5.36218e-10	1.01254e-09	1.73167e-09	-1.66629e-10	-2.79225e-10	-3.17953e-10	-3.85002e-11	9.49219e-10	2.66373e-09	4.99717e-09	7.81216e-09	1.10822e-08
0.247819	-4.08158e-11	-3.11459e-11	-1.01166e-11	1.55628e-11	8.77844e-11	2.48375e-10	5.40848e-10	1.01409e-09	1.72858e-09	-1.58995e-10	-2.76293e-10	-3.2861e-10	-2.78974e-11	9.59822e-10	2.66525e-09	5.00168e-09	7.81368e-09	1.1067e-08
0.248069	-5.00755e-11	-3.26892e-11	-7.03006e-12	1.55628e-11	7.85247e-11	2.48375e-10	5.43934e-10	1.01563e-09	1.73167e-09	-1.57524e-10	-2.8085e-10	-3.21048e-10	-3.69569e-11	9.53758e-10	2.66675e-09	4.98956e-09	7.82135e-09	1.10761e-08
0.248319	-3.92725e-11	-1.41698e-11	-1.32032e-11	1.09329e-11	8.93277e-11	2.40659e-10	5.37761e-10	1.02335e-09	1.71932e-09	-1.74245e-10	-2.80887e-10	-3.21067e-10	-3.25181e-11	9.49183e-10	2.66068e-09	4.9986e-09	7.82745e-09	1.10853e-08
0.248569	-4.54456e-11	-1.41698e-11	-1.01166e-11	1.09329e-11	8.46978e-11	2.45289e-10	5.40848e-10	1.01409e-09	1.72704e-09	-1.66702e-10	-2.82339e-10	-3.31706e-10	-4.61438e-11	9.55211e-10	2.66369e-09	4.99257e-09	7.81994e-09	1.10686e-08
0.24882	-4.39024e-11	-2.96026e-11	-1.47465e-11	1.71061e-11	8.0068e-11	2.43745e-10	5.34675e-10	1.03261e-09	1.72704e-09	-1.6357e-10	-2.70147e-10	-3.25687e-10	-3.39886e-11	9.47658e-10	2.66374e-09	4.99427e-09	7.8336e-09	1.10761e-08
0.24907	-5.47053e-11	-3.26892e-11	-1.01166e-11	2.01926e-11	8.16113e-11	2.45289e-10	5.37761e-10	1.01872e-09	1.72704e-09	-1.57497e-10	-2.70093e-10	-3.28656e-10	-2.78428e-11	9.53758e-10	2.66981e-09	5.02911e-09	7.82909e-09	1.10793e-08
0.24932	-5.00755e-11	-2.03429e-11	-7.03006e-12	1.40195e-11	8.46978e-11	2.34486e-10	5.33131e-10	1.02335e-09	1.73938e-09	-1.65086e-10	-2.73143e-10	-3.21048e-10	-3.23999e-11	9.61384e-10	2.66379e-09	4.98822e-09	7.82757e-09	1.10899e-08
0.24957	-4.54456e-11	-2.96026e-11	-1.47465e-11	1.40195e-11	8.46978e-11	2.49919e-10	5.33131e-10	1.02489e-09	1.7363e-09	-1.65095e-10	-2.73125e-10	-3.21003e-10	-3.54318e-11	9.55311e-10	2.67134e-09	5.00168e-09	7.83224e-09	1.10809e-08
0.24982	-5.00755e-11	-2.18862e-11	-1.01166e-11	1.71061e-11	9.0871e-11	2.43745e-10	5.34675e-10	1.02335e-09	1.73012e-09	-1.59022e-10	-2.67024e-10	-3.20985e-10	-2.7861e-11	9.52197e-10	2.66529e-09	4.99873e-09	7.84879e-09	1.1093e-08
0.25007	-5.00755e-11	-2.03429e-11	-5.48678e-12	1.55628e-11	8.16113e-11	2.48375e-10	5.39304e-10	1.02489e-09	1.7363e-09	-1.63543e-10	-2.67024e-10	-3.1798e-10	-3.3934e-11	9.47685e-10	2.66531e-09	5.00183e-09	7.80789e-09	1.10931e-08
0.25032	-4.23591e-11	-2.96026e-11	-1.16599e-11	1.40195e-11	8.77844e-11	2.48375e-10	5.36218e-10	1.02489e-09	1.72858e-09	-1.60529e-10	-2.73061e-10	-3.25578e-10	-3.70388e-11	9.61375e-10	2.67582e-09	5.01249e-09	7.83661e-09	1.10901e-08
0.25057	-4.54456e-11	-2.34295e-11	-7.03006e-12	1.24762e-11	8.46978e-11	2.40659e-10	5.45478e-10	1.0218e-09	1.72241e-09	-1.62045e-10	-2.62486e-10	-3.24135e-10	-4.00981e-11	9.59904e-10	2.64702e-09	5.00644e-09	7.83528e-09	1.11038e-08
0.25082	-4.85322e-11	-2.6516e-11	-1.47465e-11	2.01926e-11	9.24142e-11	2.49919e-10	5.48564e-10	1.02952e-09	1.7363e-09	-1.63524e-10	-2.73088e-10	-3.30181e-10	-3.8573e-11	9.55338e-10	2.66669e-09	5.0049e-09	7.83835e-09	1.10993e-08
0.25107	-4.69889e-11	-2.6516e-11	-1.32032e-11	1.55628e-11	8.93277e-11	2.40659e-10	5.39304e-10	1.02643e-09	1.73321e-09	-1.54401e-10	-2.71627e-10	-3.22601e-10	-3.55228e-11	9.5837e-10	2.66983e-09	5.00944e-09	7.84288e-09	1.11008e-08
0.25132	-4.54456e-11	-2.49728e-11	-1.01166e-11	1.40195e-11	8.77844e-11	2.42202e-10	5.33131e-10	1.02643e-09	1.73475e-09	-1.57424e-10	-2.71609e-10	-3.24071e-10	-3.70206e-11	9.59877e-10	2.6638e-09	5.00487e-09	7.83235e-09	1.11039e-08
0.25157	-4.69889e-11	-2.80593e-11	-1.47465e-11	9.38966e-12	8.46978e-11	2.40659e-10	5.34675e-10	1.01409e-09	1.72241e-09	-1.62027e-10	-2.70084e-10	-3.22564e-10	-3.5541e-11	9.53795e-10	2.67287e-09	5.00037e-09	7.85362e-09	1.1107e-08
0.25182	-3.77292e-11	-2.18862e-11	-1.01166e-11	1.86494e-11	8.0068e-11	2.42202e-10	5.34675e-10	1.01563e-09	1.73321e-09	-1.63543e-10	-2.70047e-10	-3.24062e-10	-4.15868e-11	9.55283e-10	2.66524e-09	5.01859e-09	7.84907e-09	1.11116e-08
0.25207	-5.31621e-11	-2.34295e-11	-1.01166e-11	2.17359e-11	8.62411e-11	2.37572e-10	5.39304e-10	1.02026e-09	1.73938e-09	-1.57442e-10	-2.65463e-10	-3.21039e-10	-3.39977e-11	9.55283e-10	2.65609e-09	5.00807e-09	7.83235e-09	1.11041e-08
0.25232	-5.47053e-11	-3.42325e-11	-3.9435e-12	1.40195e-11	8.46978e-11	2.42202e-10	5.43934e-10	1.0218e-09	1.73938e-09	-1.55935e-10	-2.63974e-10	-3.24108e-10	-3.39704e-11	9.53786e-10	2.66371e-09	5.01718e-09	7.84598e-09	1.11208e-08
0.252571	-4.69889e-11	-1.87996e-11	-1.01166e-11	2.01926e-11	8.46978e-11	2.43745e-10	5.50107e-10	1.01563e-09	1.73321e-09	-1.6504e-10	-2.74623e-10	-3.30181e-10	-3.70297e-11	9.58324e-10	2.67129e-09	5.0203e-09	7.84757e-09	1.11163e-08
0.252821	-3.77292e-11	-2.34295e-11	-1.16599e-11	1.24762e-11	9.24142e-11	2.45289e-10	5.50107e-10	1.01563e-09	1.73167e-09	-1.59022e-10	-2.71672e-10	-3.22592e-10	-3.85457e-11	9.53895e-10	2.65616e-09	5.02328e-09	7.84459e-09	1.11087e-08
0.253071	-4.39024e-11	-2.49728e-11	-1.47465e-11	2.01926e-11	9.39575e-11	2.48375e-10	5.37761e-10	1.00946e-09	1.74401e-09	-1.63533e-10	-2.77718e-10	-3.22528e-10	-3.39704e-11	9.73503e-10	2.6698e-09	5.00814e-09	7.85519e-09	1.11209e-08
0.253321	-4.23591e-11	-2.49728e-11	-1.01166e-11	6.30309e-12	8.77844e-11	2.43745e-10	5.37761e-10	1.011e-09	1.7363e-09	-1.59013e-10	-2.71663e-10	-3.19542e-10	-3.24181e-11	9.41685e-10	2.66987e-09	5.02322e-09	7.84616e-09	1.11254e-08
0.253571	-4.54456e-11	-1.41698e-11	-1.01166e-11	2.01926e-11	8.16113e-11	2.42202e-10	5.43934e-10	1.02026e-09	1.73475e-09	-1.63543e-10	-2.73107e-10	-3.30135e-10	-3.23999e-11	9.56699e-10	2.66836e-09	5.01117e-09	7.85522e-09	1.11118e-08
0.253821	-4.39024e-11	-2.49728e-11	-1.47465e-11	1.86494e-11	8.46978e-11	2.49919e-10	5.53194e-10	1.00483e-09	1.7363e-09	-1.60547e-10	-2.65536e-10	-3.19523e-10	-3.09385e-11	9.49165e-10	2.66992e-09	5.0202e-09	7.84923e-09	1.11194e-08
0.254071	-4.85322e-11	-2.96026e-11	-7.03006e-12	2.32792e-11	8.0068e-11	2.46832e-10	5.50107e-10	1.01563e-09	1.74401e-09	-1.6504e-10	-2.7297e-10	-3.19414e-10	-4.15413e-11	9.49183e-10	2.6775e-09	5.01268e-09	7.85831e-09	1.11285e-08
0.254321	-4.69889e-11	-2.34295e-11	-1.16599e-11	1.71061e-11	8.77844e-11	2.45289e-10	5.42391e-10	1.0218e-09	1.75327e-09	-1.54474e-10	-2.48787e-10	-3.11889e-10	-3.09476e-11	9.5984e-10	2.66843e-09	5.02023e-09	7.85226e-09	1.11133e-08
0.254571	-4.23591e-11	-1.72563e-11	-1.01166e-11	7.84638e-12	8.0068e-11	2.36029e-10	5.26958e-10	1.011e-09	1.72858e-09	-1.68018e-10	-2.77591e-10	-3.28565e-10	-3.39795e-11	9.56881e-10	2.67446e-09	5.01571e-09	7.85218e-09	1.11255e-08
0.254821	-5.00755e-11	-2.6516e-11	-5.48678e-12	1.40195e-11	9.0871e-11	2.53005e-10	5.39304e-10	1.00174e-09	1.74401e-09	-1.48328e-10	-2.73161e-10	-3.19514e-10	-4.1605e-11	9.61393e-10	2.67299e-09	5.01721e-09	7.8446e-09	1.11271e-08
0.255071	-3.61859e-11	-2.6516e-11	-1.32032e-11	1.24762e-11	8.31545e-11	2.43745e-10	5.42391e-10	1.01872e-09	1.7579e-09	-1.57369e-10	-2.68595e-10	-3.19469e-10	-3.85912e-11	9.53849e-10	2.6745e-09	5.01722e-09	7.85219e-09	1.11271e-08
0.255321	-5.16188e-11	-2.80593e-11	-1.47465e-11	1.40195e-11	8.16113e-11	2.53005e-10	5.47021e-10	1.02489e-09	1.74864e-09	-1.58949e-10	-2.7465e-10	-3.21012e-10	-3.69842e-11	9.62927e-10	2.67454e-09	5.0188e-09	7.85374e-09	1.11331e-08
0.255571	-5.00755e-11	-1.57131e-11	-1.47465e-11	1.86494e-11	8.0068e-11	2.40659e-10	5.45478e-10	1.01872e-09	1.75327e-09	-1.59004e-10	-2.71591e-10	-3.24044e-10	-2.64087e-11	9.58397e-10	2.67908e-09	5.02796e-09	7.8507e-09	1.11164e-08
0.255821	-5.31621e-11	-1.87996e-11	-1.16599e-11	1.86494e-11	7.85247e-11	2.54548e-10	5.36218e-10	1.02489e-09	1.72858e-09	-1.66602e-10	-2.63965e-10	-3.19514e-10	-4.45641e-11	9.5679e-10	2.67299e-09	5.02806e-09	7.85074e-09	1.1124e-08
0.256072	-5.00755e-11	-2.96026e-11	-1.7833e-11	2.17359e-11	9.0871e-11	2.46832e-10	5.47021e-10	1.02026e-09	1.74093e-09	-1.62045e-10	-2.66979e-10	-3.24062e-10	-3.09658e-11	9.47676e-10	2.6714e-09	5.03564e-09	7.85989e-09	1.11301e-08
0.256322	-5.16188e-11	-2.18862e-11	-1.47465e-11	1.71061e-11	9.24142e-11	2.46832e-10	5.43934e-10	1.01717e-09	1.76099e-09	-1.57433e-10	-2.68486e-10	-3.24053e-10	-3.39522e-11	9.55238e-10	2.66535e-09	5.028e-09	7.85994e-09	1.11302e-08
0.256572	-5.16188e-11	-2.03429e-11	-8.57335e-12	2.63658e-11	8.46978e-11	2.54548e-10	5.47021e-10	1.02798e-09	1.74556e-09	-1.55917e-10	-2.62404e-10	-3.17962e-10	-3.70297e-11	9.53767e-10	2.67597e-09	5.01732e-09	7.85994e-09	1.11317e-08
0.256822	-5.16188e-11	-2.49728e-11	-1.62898e-11	1.09329e-11	9.0871e-11	2.48375e-10	5.48564e-10	1.01409e-09	1.73784e-09	-1.61981e-10	-2.63938e-10	-3.19487e-10	-3.85457e-11	9.55265e-10	2.67302e-09	5.02489e-09	7.85993e-09	1.11271e-08
0.257072	-4.54456e-11	-2.49728e-11	-1.16599e-11	1.86494e-11	8.46978e-11	2.49919e-10	5.45478e-10	1.02798e-09	1.73784e-09	-1.57433e-10	-2.71518e-10	-3.25587e-10	-3.39977e-11	9.52279e-10	2.67912e-09	5.02649e-09	7.85687e-09	1.11287e-08
0.257322	-4.08158e-11	-2.80593e-11	-1.16599e-11	1.71061e-11	8.62411e-11	2.46832e-10	5.36218e-10	1.03106e-09	1.74401e-09	-1.55917e-10	-2.62467e-10	-3.24108e-10	-3.70479e-11	9.61429e-10	2.68218e-09	5.03103e-09	7.85686e-09	1.11501e-08
0.257572	-4.39024e-11	-2.18862e-11	-1.47465e-11	1.24762e-11	8.31545e-11	2.46832e-10	5.51651e-10	1.03415e-09	1.75481e-09	-1.62008e-10	-2.71527e-10	-3.25578e-10	-4.16596e-11	9.64507e-10	2.67764e-09	5.02351e-09	7.85692e-09	1.11456e-08
0.257822	-4.39024e-11	-2.6516e-11	-1.47465e-11	1.71061e-11	8.62411e-11	2.42202e-10	5.50107e-10	1.01872e-09	1.74864e-09	-1.62036e-10	-2.65472e-10	-3.18017e-10	-4.47006e-11	9.59922e-10	2.68057e-09	5.03557e-09	7.86752e-09	1.11472e-08
0.258072	-5.31621e-11	-2.34295e-11	-7.03006e-12	1.24762e-11	8.77844e-11	2.49919e-10	5.39304e-10	1.03878e-09	1.75019e-09	-1.60492e-10	-2.63974e-10	-3.27121e-10	-3.86276e-11	9.55356e-10	2.66541e-09	5.02043e-09	7.85536e-09	1.11517e-08
0.258322	-3.61859e-11	-2.6516e-11	-2.40021e-12	1.24762e-11	8.93277e-11	2.39116e-10	5.39304e-10	1.03261e-09	1.75019e-09	-1.5747e-10	-2.74668e-10	-3.2714e-10	-4.0089e-11	9.61429e-10	2.67605e-09	5.02646e-09	7.85074e-09	1.11426e-08
0.258572	-4.54456e-11	-2.18862e-11	-1.16599e-11	2.63658e-11	8.93277e-11	2.49919e-10	5.40848e-10	1.03106e-09	1.7471e-09	-1.63479e-10	-2.79234e-10	-3.21103e-10	-3.55865e-11	9.6142e-10	2.6867e-09	5.02955e-09	7.85537e-09	1.11532e-08
0.258822	-4.23591e-11	-3.26892e-11	-1.16599e-11	1.86494e-11	8.16113e-11	2.37572e-10	5.43934e-10	1.02489e-09	1.74864e-09	-1.51424e-10	-2.67115e-10	-3.31669e-10	-4.62257e-11	9.53804e-10	2.67149e-09	5.03107e-09	7.86906e-09	1.11503e-08
0.259072	-4.23591e-11	-3.11459e-11	-1.93763e-11	1.24762e-11	8.16113e-11	2.49919e-10	5.40848e-10	1.03415e-09	1.76253e-09	-1.69579e-10	-2.76175e-10	-3.19578e-10	-4.46915e-11	9.55329e-10	2.66684e-09	5.02654e-09	7.85853e-09	1.11548e-08
0.259322	-4.54456e-11	-2.80593e-11	-1.93763e-11	1.55628e-11	8.16113e-11	2.48375e-10	5.40848e-10	1.03415e-09	1.75944e-09	-1.57488e-10	-2.73198e-10	-3.27131e-10	-3.24999e-11	9.62936e-10	2.66984e-09	5.03257e-09	7.86911e-09	1.11533e-08
0.259573	-3.61859e-11	-2.03429e-11	-1.7833e-11	1.71061e-11	9.0871e-11	2.40659e-10	5.53194e-10	1.02798e-09	1.7471e-09	-1.5746e-10	-2.76211e-10	-3.27131e-10	-3.54773e-11	9.58425e-10	2.66536e-09	5.02505e-09	7.86468e-09	1.11503e-08
0.259823	-4.39024e-11	-2.34295e-11	-1.47465e-11	1.40195e-11	8.46978e-11	2.46832e-10	5.47021e-10	1.01872e-09	1.76562e-09	-1.65095e-10	-2.7317e-10	-3.19523e-10	-3.54409e-11	9.61402e-10	2.67905e-09	5.03722e-09	7.87839e-09	1.11623e-08
0.260073	-4.54456e-11	-1.26265e-11	-3.9435e-12	1.24762e-11	9.0871e-11	2.42202e-10	5.48564e-10	1.0218e-09	1.75173e-09	-1.66629e-10	-2.71663e-10	-3.22528e-10	-2.63268e-11	9.53849e-10	2.67757e-09	5.0403e-09	7.87993e-09	1.11213e-08
0.260323	-4.54456e-11	-1.87996e-11	-1.16599e-11	1.71061e-11	9.55008e-11	2.42202e-10	5.37761e-10	1.02026e-09	1.74864e-09	-1.60547e-10	-2.77718e-10	-3.22519e-10	-3.2409e-11	9.629e-10	2.67142e-09	5.03274e-09	7.86932e-09	1.11501e-08
0.260573	-4.54456e-11	-2.34295e-11	-8.57335e-12	1.40195e-11	9.24142e-11	2.37572e-10	5.36218e-10	1.0218e-09	1.74556e-09	-1.6199e-10	-2.71663e-10	-3.18007e-10	-3.85093e-11	9.53858e-10	2.66534e-09	5.04034e-09	7.87841e-09	1.11579e-08
0.260823	-4.54456e-11	-2.34295e-11	-1.93763e-11	1.55628e-11	8.62411e-11	2.37572e-10	5.51651e-10	1.03415e-09	1.75173e-09	-1.54392e-10	-2.73143e-10	-3.28656e-10	-3.24999e-11	9.629e-10	2.67446e-09	5.04346e-09	7.87846e-09	1.11549e-08
0.261073	-4.54456e-11	-2.03429e-11	-1.01166e-11	1.55628e-11	8.16113e-11	2.48375e-10	5.45478e-10	1.03415e-09	1.74556e-09	-1.57451e-10	-2.71627e-10	-3.28701e-10	-4.15959e-11	9.53767e-10	2.67606e-09	5.04801e-09	7.87849e-09	1.11549e-08
0.261323	-4.08158e-11	-2.18862e-11	-1.93763e-11	1.71061e-11	8.77844e-11	2.43745e-10	5.50107e-10	1.03106e-09	1.7579e-09	-1.66529e-10	-2.71627e-10	-3.25678e-10	-3.85912e-11	9.47649e-10	2.67909e-09	5.04044e-09	7.88307e-09	1.1158e-08
0.261573	-4.85322e-11	-1.87996e-11	-1.32032e-11	1.86494e-11	9.24142e-11	2.48375e-10	5.37761e-10	1.01872e-09	1.74556e-09	-1.51415e-10	-2.73143e-10	-3.3019e-10	-3.70843e-11	9.53722e-10	2.67455e-09	5.04492e-09	7.88461e-09	1.1164e-08
0.261823	-5.16188e-11	-2.34295e-11	-1.01166e-11	9.38966e-12	8.77844e-11	2.40659e-10	5.42391e-10	1.02026e-09	1.74093e-09	-1.65059e-10	-2.71609e-10	-3.22574e-10	-4.31664e-11	9.55329e-10	2.67602e-09	5.03732e-09	7.88155e-09	1.1155e-08
0.262073	-5.16188e-11	-2.96026e-11	-3.9435e-12	1.71061e-11	9.39575e-11	2.48375e-10	5.40848e-10	1.02335e-09	1.75173e-09	-1.66638e-10	-2.68559e-10	-3.19505e-10	-4.16596e-11	9.62945e-10	2.67143e-09	5.03739e-09	7.87854e-09	1.11702e-08
0.262323	-4.85322e-11	-1.87996e-11	-7.03006e-12	1.71061e-11	9.39575e-11	2.42202e-10	5.39304e-10	1.03106e-09	1.7471e-09	-1.62099e-10	-2.70065e-10	-3.24035e-10	-3.86003e-11	9.59913e-10	2.66837e-09	5.05558e-09	7.88763e-09	1.11779e-08
0.262573	-4.39024e-11	-2.34295e-11	-1.16599e-11	1.40195e-11	9.0871e-11	2.48375e-10	5.36218e-10	1.03106e-09	1.74864e-09	-1.66647e-10	-2.70084e-10	-3.19469e-10	-3.85457e-11	9.55311e-10	2.67137e-09	5.03739e-09	7.8816e-09	1.11704e-08
0.262823	-4.39024e-11	-1.87996e-11	-1.01166e-11	1.09329e-11	8.62411e-11	2.45289e-10	5.47021e-10	1.01254e-09	1.7579e-09	-1.66611e-10	-2.71582e-10	-3.16446e-10	-3.24726e-11	9.53795e-10	2.66532e-09	5.03729e-09	7.88474e-09	1.11749e-08
0.263073	-3.92725e-11	-2.96026e-11	-8.57335e-12	1.55628e-11	8.62411e-11	2.40659e-10	5.48564e-10	1.04341e-09	1.75173e-09	-1.55963e-10	-2.67052e-10	-3.25633e-10	-3.69842e-11	9.59895e-10	2.67141e-09	5.03886e-09	7.90443e-09	1.11688e-08
0.263324	-4.85322e-11	-2.80593e-11	-7.03006e-12	1.55628e-11	8.16113e-11	2.45289e-10	5.40848e-10	1.04187e-09	1.7363e-09	-1.60474e-10	-2.73152e-10	-3.34783e-10	-3.24635e-11	9.61466e-10	2.67459e-09	5.04648e-09	7.87865e-09	1.11734e-08
0.263574	-4.69889e-11	-2.18862e-11	-8.57335e-12	1.55628e-11	9.0871e-11	2.48375e-10	5.50107e-10	1.02335e-09	1.7579e-09	-1.60474e-10	-2.77746e-10	-3.25669e-10	-3.70206e-11	9.63e-10	2.69124e-09	5.04501e-09	7.88466e-09	1.11886e-08
0.263824	-4.69889e-11	-2.03429e-11	-1.32032e-11	1.55628e-11	9.24142e-11	2.42202e-10	5.43934e-10	1.03261e-09	1.75481e-09	-1.55908e-10	-2.74723e-10	-3.22601e-10	-3.85002e-11	9.62963e-10	2.66698e-09	5.04655e-09	7.89534e-09	1.11751e-08
0.264074	-4.23591e-11	-2.80593e-11	-2.09196e-11	2.01926e-11	8.46978e-11	2.40659e-10	5.45478e-10	1.03261e-09	1.7471e-09	-1.57415e-10	-2.74741e-10	-3.28728e-10	-2.6436e-11	9.55365e-10	2.67292e-09	5.04958e-09	7.88934e-09	1.11872e-08
0.264324	-5.00755e-11	-2.96026e-11	-8.5693e-13	1.40195e-11	9.24142e-11	2.48375e-10	5.43934e-10	1.02952e-09	1.75173e-09	-1.58967e-10	-2.80823e-10	-3.36354e-10	-4.76143e-11	9.59886e-10	2.67151e-09	5.04502e-09	7.89536e-09	1.11918e-08
0.264574	-4.39024e-11	-1.57131e-11	-1.01166e-11	1.40195e-11	8.62411e-11	2.46832e-10	5.53194e-10	1.03261e-09	1.75173e-09	-1.62036e-10	-2.77837e-10	-3.30254e-10	-3.10022e-11	9.58397e-10	2.68366e-09	5.04496e-09	7.88776e-09	1.11858e-08
0.264824	-4.23591e-11	-2.49728e-11	-1.01166e-11	1.71061e-11	8.46978e-11	2.45289e-10	5.45478e-10	1.02643e-09	1.7471e-09	-1.63597e-10	-2.82339e-10	-3.22619e-10	-3.70115e-11	9.59922e-10	2.67764e-09	5.03887e-09	7.88626e-09	1.11873e-08
0.265074	-3.77292e-11	-2.34295e-11	-8.57335e-12	1.24762e-11	8.46978e-11	2.42202e-10	5.45478e-10	1.02489e-09	1.7579e-09	-1.66656e-10	-2.73243e-10	-3.27131e-10	-3.85639e-11	9.61493e-10	2.67916e-09	5.04035e-09	7.89842e-09	1.11934e-08
0.265324	-4.23591e-11	-2.80593e-11	-1.7833e-11	1.24762e-11	8.77844e-11	2.37572e-10	5.36218e-10	1.02798e-09	1.76099e-09	-1.66611e-10	-2.77718e-10	-3.24108e-10	-3.70479e-11	9.67539e-10	2.6837e-09	5.03883e-09	7.89241e-09	1.1195e-08
0.265574	-4.08158e-11	-2.34295e-11	-8.57335e-12	1.86494e-11	8.62411e-11	2.40659e-10	5.40848e-10	1.04187e-09	1.7363e-09	-1.55972e-10	-2.70102e-10	-3.24071e-10	-3.70752e-11	9.56918e-10	2.67607e-09	5.03887e-09	7.89544e-09	1.1195e-08
0.265824	-5.00755e-11	-2.03429e-11	-7.03006e-12	1.71061e-11	8.77844e-11	2.49919e-10	5.45478e-10	1.0218e-09	1.75481e-09	-1.62063e-10	-2.67015e-10	-3.21067e-10	-4.31482e-11	9.59968e-10	2.67145e-09	5.04648e-09	7.89855e-09	1.11965e-08
0.266074	-4.69889e-11	-2.6516e-11	-1.01166e-11	1.71061e-11	8.62411e-11	2.48375e-10	5.45478e-10	1.02026e-09	1.75327e-09	-1.71195e-10	-2.6855e-10	-3.28665e-10	-3.8573e-11	9.70707e-10	2.67145e-09	5.04498e-09	7.90616e-09	1.11889e-08
0.266324	-5.00755e-11	-2.34295e-11	-1.01166e-11	2.48225e-11	8.77844e-11	2.42202e-10	5.47021e-10	1.03569e-09	1.74401e-09	-1.62072e-10	-2.73143e-10	-3.27167e-10	-3.24635e-11	9.78196e-10	2.67604e-09	5.04041e-09	7.90011e-09	1.11904e-08
0.266574	-5.00755e-11	-2.03429e-11	-1.16599e-11	1.40195e-11	8.77844e-11	2.45289e-10	5.47021e-10	1.02335e-09	1.7471e-09	-1.57451e-10	-2.74686e-10	-3.2408e-10	-3.54955e-11	9.44772e-10	2.67761e-09	5.04341e-09	7.90155e-09	1.11934e-08
0.266825	-4.69889e-11	-2.6516e-11	-1.32032e-11	1.86494e-11	8.31545e-11	2.42202e-10	5.40848e-10	1.04187e-09	1.7579e-09	-1.58958e-10	-2.73143e-10	-3.1946e-10	-3.8573e-11	9.58279e-10	2.68067e-09	5.03883e-09	7.89246e-09	1.11919e-08
0.267075	-3.77292e-11	-1.72563e-11	-7.03006e-12	2.01926e-11	9.39575e-11	2.49919e-10	5.42391e-10	1.03106e-09	1.75944e-09	-1.60456e-10	-2.68559e-10	-3.14884e-10	-4.00526e-11	9.55347e-10	2.68067e-09	5.03579e-09	7.90152e-09	1.11995e-08
0.267325	-5.00755e-11	-2.80593e-11	-2.40021e-12	1.86494e-11	8.16113e-11	2.48375e-10	5.59367e-10	1.04187e-09	1.74401e-09	-1.5441e-10	-2.68477e-10	-3.19432e-10	-2.94407e-11	9.61402e-10	2.6776e-09	5.04192e-09	7.89546e-09	1.11951e-08
0.267575	-4.39024e-11	-3.57757e-11	-1.16599e-11	2.01926e-11	9.39575e-11	2.42202e-10	5.53194e-10	1.03569e-09	1.76099e-09	-1.62017e-10	-2.59481e-10	-3.19514e-10	-3.85093e-11	9.5689e-10	2.67456e-09	5.04955e-09	7.89242e-09	1.12057e-08
0.267825	-3.92725e-11	-1.57131e-11	-8.57335e-12	2.01926e-11	8.31545e-11	2.40659e-10	5.53194e-10	1.03569e-09	1.7579e-09	-1.65113e-10	-2.85253e-10	-3.28656e-10	-3.55319e-11	9.61384e-10	2.67909e-09	5.04504e-09	7.90007e-09	1.11981e-08
0.268075	-4.39024e-11	-1.87996e-11	-1.01166e-11	2.63658e-11	8.62411e-11	2.34486e-10	5.51651e-10	1.03106e-09	1.7579e-09	-1.65159e-10	-2.68668e-10	-3.27167e-10	-3.85548e-11	9.52351e-10	2.67458e-09	5.04803e-09	7.90772e-09	1.12042e-08
0.268325	-5.47053e-11	-2.6516e-11	-8.5693e-13	1.71061e-11	8.46978e-11	2.40659e-10	5.47021e-10	1.03106e-09	1.75944e-09	-1.69679e-10	-2.7465e-10	-3.24099e-10	-3.70752e-11	9.67493e-10	2.68211e-09	5.04355e-09	7.90471e-09	1.12042e-08
0.268575	-4.39024e-11	-2.80593e-11	-1.01166e-11	1.86494e-11	8.31545e-11	2.43745e-10	5.43934e-10	1.03106e-09	1.76253e-09	-1.60556e-10	-2.717e-10	-3.22537e-10	-4.16323e-11	9.5847e-10	2.67e-09	5.05571e-09	7.90319e-09	1.11997e-08
0.268825	-4.69889e-11	-2.96026e-11	-1.62898e-11	2.01926e-11	8.62411e-11	2.42202e-10	5.47021e-10	1.02798e-09	1.76253e-09	-1.60501e-10	-2.82339e-10	-3.19469e-10	-4.01618e-11	9.64488e-10	2.67761e-09	5.05426e-09	7.90773e-09	1.12073e-08
0.269075	-3.92725e-11	-2.34295e-11	-1.47465e-11	1.86494e-11	8.77844e-11	2.46832e-10	5.51651e-10	1.04341e-09	1.77642e-09	-1.60492e-10	-2.79316e-10	-3.17935e-10	-4.4646e-11	9.60013e-10	2.68676e-09	5.05426e-09	7.90328e-09	1.12027e-08
0.269325	-4.23591e-11	-3.26892e-11	-8.57335e-12	2.17359e-11	8.0068e-11	2.43745e-10	5.50107e-10	1.03415e-09	1.77333e-09	-1.59004e-10	-2.73198e-10	-3.19451e-10	-3.10203e-11	9.70607e-10	2.67922e-09	5.05578e-09	7.91999e-09	1.12027e-08
0.269575	-4.39024e-11	-2.49728e-11	-1.01166e-11	1.24762e-11	8.46978e-11	2.48375e-10	5.45478e-10	1.02489e-09	1.7579e-09	-1.65131e-10	-2.73116e-10	-3.19478e-10	-4.30937e-11	9.61529e-10	2.68533e-09	5.05428e-09	7.91244e-09	1.11967e-08
0.269825	-5.00755e-11	-2.18862e-11	-1.93763e-11	1.86494e-11	8.77844e-11	2.46832e-10	5.40848e-10	1.03878e-09	1.7687e-09	-1.71268e-10	-2.65508e-10	-3.22555e-10	-3.55683e-11	9.62991e-10	2.69449e-09	5.05729e-09	7.90927e-09	1.12165e-08
0.270075	-4.54456e-11	-3.11459e-11	-3.9435e-12	1.55628e-11	8.31545e-11	2.49919e-10	5.45478e-10	1.03106e-09	1.77642e-09	-1.71232e-10	-2.6854e-10	-3.27149e-10	-4.00526e-11	9.61438e-10	2.68992e-09	5.05274e-09	7.89716e-09	1.12149e-08
0.270326	-4.54456e-11	-2.6516e-11	-8.57335e-12	2.17359e-11	8.77844e-11	2.37572e-10	5.48564e-10	1.03415e-09	1.76716e-09	-1.59049e-10	-2.73116e-10	-3.27212e-10	-3.24544e-11	9.55402e-10	2.68228e-09	5.05278e-09	7.91539e-09	1.11951e-08
0.270576	-4.85322e-11	-2.80593e-11	-7.03006e-12	1.24762e-11	7.23516e-11	2.51462e-10	5.50107e-10	1.02489e-09	1.76716e-09	-1.62027e-10	-2.70075e-10	-3.33195e-10	-3.23999e-11	9.6753e-10	2.68375e-09	5.06492e-09	7.91551e-09	1.11981e-08
0.270826	-4.54456e-11	-2.80593e-11	-5.48678e-12	2.01926e-11	8.16113e-11	2.48375e-10	5.53194e-10	1.02335e-09	1.74864e-09	-1.62045e-10	-2.67015e-10	-3.13523e-10	-3.09203e-11	9.61529e-10	2.68233e-09	5.05433e-09	7.91704e-09	1.12057e-08
0.271076	-5.16188e-11	-2.49728e-11	-7.03006e-12	1.86494e-11	7.85247e-11	2.40659e-10	5.43934e-10	1.02798e-09	1.75944e-09	-1.62017e-10	-2.68468e-10	-3.33204e-10	-3.85093e-11	9.66095e-10	2.69742e-09	5.05581e-09	7.91702e-09	1.12028e-08
0.271326	-4.08158e-11	-2.34295e-11	-7.03006e-12	1.55628e-11	7.38949e-11	2.37572e-10	5.53194e-10	1.04341e-09	1.77333e-09	-1.57479e-10	-2.59417e-10	-3.28701e-10	-3.40159e-11	9.70689e-10	2.67319e-09	5.06035e-09	7.91241e-09	1.12196e-08
0.271576	-4.54456e-11	-2.6516e-11	-1.16599e-11	1.40195e-11	8.46978e-11	2.45289e-10	5.48564e-10	1.03106e-09	1.76716e-09	-1.63543e-10	-2.74468e-10	-3.21058e-10	-4.00526e-11	9.69155e-10	2.68521e-09	5.05127e-09	7.90782e-09	1.12273e-08
0.271826	-3.77292e-11	-3.26892e-11	-1.16599e-11	2.01926e-11	9.24142e-11	2.48375e-10	5.48564e-10	1.03415e-09	1.76407e-09	-1.62081e-10	-2.50267e-10	-3.22546e-10	-3.40068e-11	9.62982e-10	2.68077e-09	5.05881e-09	7.90936e-09	1.12182e-08
0.272076	-4.08158e-11	-2.03429e-11	-3.9435e-12	1.09329e-11	9.0871e-11	2.46832e-10	5.47021e-10	1.02798e-09	1.76253e-09	-1.66666e-10	-2.68431e-10	-3.24035e-10	-3.70479e-11	9.52333e-10	2.69141e-09	5.05436e-09	7.91696e-09	1.12166e-08
0.272326	-4.54456e-11	-2.80593e-11	-1.16599e-11	1.24762e-11	8.46978e-11	2.46832e-10	5.51651e-10	1.03569e-09	1.76099e-09	-1.69743e-10	-2.70056e-10	-3.16446e-10	-4.16232e-11	9.62972e-10	2.68994e-09	5.06807e-09	7.91095e-09	1.1212e-08
0.272576	-4.08158e-11	-3.42325e-11	-7.03006e-12	1.71061e-11	9.0871e-11	2.48375e-10	5.6091e-10	1.03106e-09	1.7687e-09	-1.69734e-10	-2.68522e-10	-3.21012e-10	-3.86003e-11	9.67584e-10	2.68844e-09	5.06962e-09	7.91854e-09	1.12181e-08
0.272826	-5.47053e-11	-2.80593e-11	-8.57335e-12	1.71061e-11	9.24142e-11	2.37572e-10	5.57824e-10	1.03106e-09	1.77333e-09	-1.6514e-10	-2.65463e-10	-3.27085e-10	-3.85821e-11	9.63073e-10	2.69292e-09	5.06051e-09	7.91854e-09	1.12228e-08
0.273076	-4.54456e-11	-2.6516e-11	-8.57335e-12	1.71061e-11	8.16113e-11	2.36029e-10	5.42391e-10	1.04032e-09	1.76099e-09	-1.62072e-10	-2.65427e-10	-3.18026e-10	-3.85184e-11	9.69118e-10	2.67924e-09	5.06505e-09	7.91093e-09	1.12273e-08
0.273326	-4.08158e-11	-2.34295e-11	-8.57335e-12	2.48225e-11	7.69814e-11	2.39116e-10	5.45478e-10	1.03415e-09	1.76716e-09	-1.63552e-10	-2.62385e-10	-3.27103e-10	-2.79065e-11	9.64561e-10	2.68219e-09	5.06813e-09	7.91246e-09	1.12105e-08
0.273576	-4.23591e-11	-1.57131e-11	-8.57335e-12	1.24762e-11	8.46978e-11	2.42202e-10	5.51651e-10	1.03724e-09	1.77025e-09	-1.5904e-10	-2.63911e-10	-3.24144e-10	-3.85457e-11	9.61511e-10	2.67921e-09	5.06807e-09	7.92163e-09	1.1212e-08
0.273826	-4.54456e-11	-3.11459e-11	-5.48678e-12	1.40195e-11	8.77844e-11	2.39116e-10	5.48564e-10	1.04032e-09	1.76407e-09	-1.68127e-10	-2.66924e-10	-3.30144e-10	-4.3121e-11	9.66086e-10	2.68835e-09	5.05593e-09	7.92318e-09	1.12258e-08
0.274077	-4.69889e-11	-2.49728e-11	-1.47465e-11	1.24762e-11	8.62411e-11	2.43745e-10	5.48564e-10	1.03415e-09	1.75944e-09	-1.62118e-10	-2.59363e-10	-3.16519e-10	-3.24817e-11	9.69164e-10	2.68996e-09	5.06653e-09	7.91861e-09	1.12366e-08
0.274327	-3.92725e-11	-2.18862e-11	-7.03006e-12	1.40195e-11	8.0068e-11	2.43745e-10	5.50107e-10	1.03106e-09	1.76407e-09	-1.68163e-10	-2.66961e-10	-3.2714e-10	-3.39704e-11	9.692e-10	2.69455e-09	5.0651e-09	7.91699e-09	1.12336e-08
0.274577	-4.08158e-11	-2.6516e-11	-1.47465e-11	1.86494e-11	8.46978e-11	2.46832e-10	5.48564e-10	1.03569e-09	1.77488e-09	-1.65095e-10	-2.70056e-10	-3.31751e-10	-3.85184e-11	9.72178e-10	2.69454e-09	5.07114e-09	7.90636e-09	1.12336e-08
0.274827	-4.39024e-11	-3.11459e-11	-1.32032e-11	2.01926e-11	8.93277e-11	2.45289e-10	5.57824e-10	1.03878e-09	1.75327e-09	-1.5599e-10	-2.70093e-10	-3.27222e-10	-3.24908e-11	9.60031e-10	2.68845e-09	5.06204e-09	7.91549e-09	1.12443e-08
0.275077	-4.69889e-11	-2.6516e-11	-2.40021e-12	2.01926e-11	8.62411e-11	2.45289e-10	5.62454e-10	1.04187e-09	1.76562e-09	-1.66611e-10	-2.73143e-10	-3.30235e-10	-4.00435e-11	9.6605e-10	2.68993e-09	5.06508e-09	7.92314e-09	1.12367e-08
0.275327	-4.23591e-11	-2.6516e-11	-1.62898e-11	1.71061e-11	8.62411e-11	2.45289e-10	5.48564e-10	1.03724e-09	1.76716e-09	-1.66666e-10	-2.73134e-10	-3.28701e-10	-3.39704e-11	9.64516e-10	2.68992e-09	5.07282e-09	7.91865e-09	1.12443e-08
0.275577	-4.23591e-11	-2.03429e-11	-5.48678e-12	2.01926e-11	8.31545e-11	2.49919e-10	5.6091e-10	1.03569e-09	1.77333e-09	-1.65095e-10	-2.68586e-10	-3.24162e-10	-3.09021e-11	9.56963e-10	2.6853e-09	5.08788e-09	7.92473e-09	1.12458e-08
0.275827	-4.39024e-11	-2.34295e-11	-1.16599e-11	2.01926e-11	8.46978e-11	2.51462e-10	5.56281e-10	1.02643e-09	1.76562e-09	-1.57497e-10	-2.73088e-10	-3.3177e-10	-3.39249e-11	9.70616e-10	2.67773e-09	5.04847e-09	7.92627e-09	1.12337e-08
0.276077	-4.39024e-11	-2.80593e-11	-1.16599e-11	1.09329e-11	8.62411e-11	2.42202e-10	5.57824e-10	1.04187e-09	1.77179e-09	-1.63524e-10	-2.65499e-10	-3.33258e-10	-3.24363e-11	9.66105e-10	2.69292e-09	5.07411e-09	7.92174e-09	1.12458e-08
0.276327	-4.39024e-11	-2.6516e-11	-1.47465e-11	1.71061e-11	9.24142e-11	2.45289e-10	5.54737e-10	1.03724e-09	1.75944e-09	-1.59031e-10	-2.66952e-10	-3.1956e-10	-3.55137e-11	9.63036e-10	2.68992e-09	5.06508e-09	7.9277e-09	1.12368e-08
0.276577	-3.77292e-11	-1.41698e-11	-8.57335e-12	2.01926e-11	8.77844e-11	2.46832e-10	5.50107e-10	1.02643e-09	1.7687e-09	-1.6662e-10	-2.62395e-10	-3.22519e-10	-4.1605e-11	9.64498e-10	2.68389e-09	5.0605e-09	7.9096e-09	1.12489e-08
0.276827	-4.39024e-11	-2.34295e-11	-1.47465e-11	1.24762e-11	8.93277e-11	2.48375e-10	5.47021e-10	1.03415e-09	1.77025e-09	-1.65095e-10	-2.63911e-10	-3.21048e-10	-3.70752e-11	9.56918e-10	2.6975e-09	5.06808e-09	7.93696e-09	1.12443e-08
0.277077	-5.00755e-11	-2.96026e-11	-7.03006e-12	2.01926e-11	8.62411e-11	2.53005e-10	5.56281e-10	1.03106e-09	1.76099e-09	-1.57506e-10	-2.66997e-10	-3.27112e-10	-3.8573e-11	9.63009e-10	2.68388e-09	5.06507e-09	7.9401e-09	1.12367e-08
0.277327	-4.54456e-11	-2.49728e-11	-1.16599e-11	1.71061e-11	8.93277e-11	2.49919e-10	5.56281e-10	1.03724e-09	1.7579e-09	-1.65077e-10	-2.71563e-10	-3.22574e-10	-3.85639e-11	9.69118e-10	2.68845e-09	5.06507e-09	7.92797e-09	1.12413e-08
0.277578	-4.39024e-11	-2.18862e-11	-1.01166e-11	1.40195e-11	8.93277e-11	2.46832e-10	5.62454e-10	1.04032e-09	1.76562e-09	-1.63579e-10	-2.67024e-10	-3.22537e-10	-3.54955e-11	9.64561e-10	2.70063e-09	5.06665e-09	7.93551e-09	1.12459e-08
0.277828	-4.54456e-11	-1.87996e-11	-3.9435e-12	1.86494e-11	8.77844e-11	2.48375e-10	5.45478e-10	1.04495e-09	1.75944e-09	-1.60511e-10	-2.68513e-10	-3.21003e-10	-3.24544e-11	9.61511e-10	2.69311e-09	5.07725e-09	7.93398e-09	1.12459e-08
0.278078	-4.39024e-11	-3.26892e-11	-8.57335e-12	1.24762e-11	8.62411e-11	2.54548e-10	5.51651e-10	1.03569e-09	1.76407e-09	-1.59013e-10	-2.67015e-10	-3.19432e-10	-3.70661e-11	9.6605e-10	2.6991e-09	5.06211e-09	7.92639e-09	1.12383e-08
0.278328	-5.00755e-11	-1.57131e-11	2.22964e-12	1.55628e-11	7.85247e-11	2.46832e-10	5.54737e-10	1.02952e-09	1.7579e-09	-1.66565e-10	-2.70047e-10	-3.13423e-10	-4.62075e-11	9.63064e-10	2.68849e-09	5.06967e-09	7.93398e-09	1.12566e-08
0.278578	-4.23591e-11	-2.49728e-11	-8.57335e-12	1.55628e-11	9.24142e-11	2.46832e-10	5.59367e-10	1.02952e-09	1.76099e-09	-1.55972e-10	-2.68568e-10	-3.3009e-10	-4.01618e-11	9.69155e-10	2.69305e-09	5.07427e-09	7.93398e-09	1.12598e-08
0.278828	-5.00755e-11	-1.87996e-11	-1.16599e-11	1.09329e-11	8.31545e-11	2.43745e-10	5.51651e-10	1.04187e-09	1.77179e-09	-1.6199e-10	-2.73043e-10	-3.17971e-10	-4.01254e-11	9.7068e-10	2.70066e-09	5.07123e-09	7.92789e-09	1.12584e-08
0.279078	-4.69889e-11	-2.49728e-11	-1.32032e-11	1.86494e-11	8.77844e-11	2.46832e-10	5.6091e-10	1.04341e-09	1.76562e-09	-1.58995e-10	-2.5791e-10	-3.14912e-10	-4.01072e-11	9.64607e-10	2.69464e-09	5.06814e-09	7.92945e-09	1.12735e-08
0.279328	-4.23591e-11	-1.72563e-11	-5.48678e-12	2.17359e-11	8.0068e-11	2.40659e-10	5.51651e-10	1.05113e-09	1.76562e-09	-1.62008e-10	-2.73034e-10	-3.2556e-10	-3.70024e-11	9.67666e-10	2.69913e-09	5.06509e-09	7.94167e-09	1.12538e-08
0.279578	-5.47053e-11	-2.80593e-11	-1.16599e-11	1.71061e-11	8.46978e-11	2.51462e-10	5.50107e-10	1.03415e-09	1.76407e-09	-1.58967e-10	-2.67034e-10	-3.24062e-10	-2.78883e-11	9.751e-10	2.6915e-09	5.0681e-09	7.94321e-09	1.1269e-08
0.279828	-4.23591e-11	-2.34295e-11	-1.32032e-11	2.79091e-11	9.55008e-11	2.46832e-10	5.54737e-10	1.03724e-09	1.75944e-09	-1.57415e-10	-2.68504e-10	-3.1798e-10	-3.69569e-11	9.40214e-10	2.68696e-09	5.06359e-09	7.93262e-09	1.12706e-08
0.280078	-4.54456e-11	-2.6516e-11	-1.32032e-11	2.01926e-11	9.24142e-11	2.40659e-10	5.51651e-10	1.04187e-09	1.75481e-09	-1.55899e-10	-2.65508e-10	-3.22574e-10	-3.24635e-11	9.64343e-10	2.6991e-09	5.07271e-09	7.9463e-09	1.12645e-08
0.280328	-4.54456e-11	-2.34295e-11	-1.7833e-11	1.86494e-11	9.39575e-11	2.42202e-10	5.59367e-10	1.04495e-09	1.75327e-09	-1.5894e-10	-2.73034e-10	-3.31679e-10	-3.69569e-11	9.53877e-10	2.69466e-09	5.07127e-09	7.94941e-09	1.12721e-08
0.280578	-5.31621e-11	-2.96026e-11	-1.01166e-11	1.86494e-11	8.62411e-11	2.42202e-10	5.54737e-10	1.0465e-09	1.76716e-09	-1.5894e-10	-2.59426e-10	-3.19532e-10	-2.78701e-11	9.6447e-10	2.70525e-09	5.07734e-09	7.9448e-09	1.12721e-08
0.280828	-4.39024e-11	-1.72563e-11	-1.16599e-11	1.86494e-11	8.77844e-11	2.46832e-10	5.57824e-10	1.02952e-09	1.7687e-09	-1.55926e-10	-2.71518e-10	-3.19451e-10	-3.39522e-11	9.6152e-10	2.6946e-09	5.07282e-09	7.93564e-09	1.1266e-08
0.281079	-4.39024e-11	-2.03429e-11	-1.01166e-11	2.01926e-11	8.31545e-11	2.39116e-10	5.54737e-10	1.04187e-09	1.77025e-09	-1.61981e-10	-2.67006e-10	-3.17944e-10	-4.0089e-11	9.67593e-10	2.68845e-09	5.07579e-09	7.93869e-09	1.1266e-08
0.281329	-4.08158e-11	-2.03429e-11	-2.40021e-12	1.24762e-11	8.62411e-11	2.51462e-10	5.51651e-10	1.04958e-09	1.76716e-09	-1.57488e-10	-2.65472e-10	-3.20985e-10	-4.01254e-11	9.66068e-10	2.68997e-09	5.06671e-09	7.9478e-09	1.1269e-08
0.281579	-5.62486e-11	-1.72563e-11	-8.57335e-12	6.30309e-12	8.62411e-11	2.46832e-10	5.51651e-10	1.03106e-09	1.77488e-09	-1.65059e-10	-2.68495e-10	-3.20994e-10	-4.0089e-11	9.60022e-10	2.69607e-09	5.07578e-09	7.93868e-09	1.12645e-08
0.281829	-5.00755e-11	-2.80593e-11	-8.57335e-12	1.86494e-11	8.77844e-11	2.46832e-10	5.56281e-10	1.03569e-09	1.76716e-09	-1.60547e-10	-2.65499e-10	-3.19505e-10	-3.40159e-11	9.70598e-10	2.69458e-09	5.07127e-09	7.93404e-09	1.1269e-08
0.282079	-4.54456e-11	-2.49728e-11	-8.57335e-12	2.32792e-11	9.0871e-11	2.51462e-10	5.56281e-10	1.02952e-09	1.76716e-09	-1.63597e-10	-2.71554e-10	-3.25596e-10	-3.86003e-11	9.60013e-10	2.69459e-09	5.07435e-09	7.93254e-09	1.12676e-08
0.282329	-4.69889e-11	-1.57131e-11	-8.57335e-12	1.55628e-11	8.77844e-11	2.60721e-10	5.63997e-10	1.03724e-09	1.77179e-09	-1.68209e-10	-2.67006e-10	-3.2566e-10	-4.62075e-11	9.64552e-10	2.69766e-09	5.08353e-09	7.94167e-09	1.12736e-08
0.282579	-5.16188e-11	-2.18862e-11	-1.01166e-11	2.17359e-11	8.0068e-11	2.34486e-10	5.50107e-10	1.03878e-09	1.77951e-09	-1.71268e-10	-2.65454e-10	-3.30181e-10	-3.86003e-11	9.69137e-10	2.70076e-09	5.08506e-09	7.94026e-09	1.12584e-08
0.282829	-4.69889e-11	-2.18862e-11	-1.16599e-11	1.40195e-11	9.0871e-11	2.48375e-10	5.57824e-10	1.0465e-09	1.77488e-09	-1.68218e-10	-2.65436e-10	-3.21067e-10	-3.40159e-11	9.66095e-10	2.70527e-09	5.07741e-09	7.94934e-09	1.1269e-08
0.283079	-4.39024e-11	-1.87996e-11	-7.03006e-12	1.24762e-11	8.62411e-11	2.46832e-10	5.62454e-10	1.0465e-09	1.77333e-09	-1.65168e-10	-2.63901e-10	-3.22555e-10	-4.00344e-11	9.631e-10	2.6916e-09	5.07132e-09	7.94028e-09	1.12752e-08
0.283329	-4.08158e-11	-2.03429e-11	-5.48678e-12	1.24762e-11	9.0871e-11	2.49919e-10	5.56281e-10	1.05267e-09	1.78568e-09	-1.68172e-10	-2.62367e-10	-3.25596e-10	-3.09385e-11	9.75182e-10	2.69609e-09	5.08045e-09	7.94638e-09	1.12738e-08
0.283579	-3.92725e-11	-2.49728e-11	-1.32032e-11	1.24762e-11	8.62411e-11	2.42202e-10	5.56281e-10	1.03106e-09	1.76716e-09	-1.63606e-10	-2.62422e-10	-3.22564e-10	-3.39249e-11	9.58515e-10	2.69611e-09	5.08351e-09	7.95554e-09	1.12844e-08
0.283829	-4.08158e-11	-2.80593e-11	-1.47465e-11	1.09329e-11	8.93277e-11	2.42202e-10	5.45478e-10	1.04804e-09	1.78105e-09	-1.62063e-10	-2.7307e-10	-3.22583e-10	-3.24363e-11	9.64525e-10	2.69462e-09	5.07596e-09	7.95097e-09	1.12845e-08
0.284079	-5.00755e-11	-2.80593e-11	-1.16599e-11	1.86494e-11	8.93277e-11	2.48375e-10	5.59367e-10	1.04032e-09	1.78259e-09	-1.63634e-10	-2.68577e-10	-3.28674e-10	-3.55046e-11	9.66068e-10	2.7007e-09	5.08506e-09	7.94185e-09	1.12784e-08
0.284329	-4.39024e-11	-1.87996e-11	-1.01166e-11	1.40195e-11	8.77844e-11	2.46832e-10	5.57824e-10	1.04341e-09	1.77179e-09	-1.72739e-10	-2.71609e-10	-3.27176e-10	-4.00708e-11	9.63073e-10	2.69921e-09	5.08511e-09	7.95089e-09	1.12845e-08
0.284579	-4.54456e-11	-2.03429e-11	-7.03006e-12	1.09329e-11	8.46978e-11	2.43745e-10	5.53194e-10	1.04341e-09	1.78568e-09	-1.63679e-10	-2.73079e-10	-3.25633e-10	-3.55228e-11	9.70652e-10	2.69923e-09	5.08364e-09	7.94186e-09	1.12861e-08
0.28483	-3.61859e-11	-2.03429e-11	-8.57335e-12	1.55628e-11	9.39575e-11	2.46832e-10	5.50107e-10	1.03569e-09	1.78414e-09	-1.6967e-10	-2.60951e-10	-3.2408e-10	-3.55137e-11	9.66095e-10	2.70374e-09	5.09273e-09	7.95243e-09	1.12936e-08
0.28508	-3.30994e-11	-2.6516e-11	-1.32032e-11	1.55628e-11	8.77844e-11	2.43745e-10	5.57824e-10	1.04804e-09	1.76716e-09	-1.60574e-10	-2.71545e-10	-3.21012e-10	-3.85821e-11	9.61548e-10	2.69315e-09	5.08363e-09	7.9449e-09	1.12815e-08
0.28533	-4.39024e-11	-2.6516e-11	-8.57335e-12	1.55628e-11	8.93277e-11	2.48375e-10	5.54737e-10	1.05113e-09	1.77951e-09	-1.63561e-10	-2.70111e-10	-3.19487e-10	-4.16323e-11	9.70625e-10	2.70223e-09	5.08355e-09	7.94944e-09	1.1286e-08
0.28558	-4.39024e-11	-2.18862e-11	-8.57335e-12	1.55628e-11	8.93277e-11	2.46832e-10	5.6554e-10	1.03724e-09	1.77488e-09	-1.62045e-10	-2.74632e-10	-3.22555e-10	-3.85912e-11	9.63091e-10	2.70081e-09	5.07905e-09	7.95102e-09	1.12875e-08
0.28583	-3.61859e-11	-2.18862e-11	-1.16599e-11	1.71061e-11	8.16113e-11	2.46832e-10	5.56281e-10	1.04341e-09	1.7687e-09	-1.60529e-10	-2.67043e-10	-3.27131e-10	-3.70297e-11	9.691e-10	2.70989e-09	5.09119e-09	7.9571e-09	1.12846e-08
0.28608	-4.54456e-11	-2.49728e-11	-1.7833e-11	9.38966e-12	8.62411e-11	2.39116e-10	5.63997e-10	1.04032e-09	1.76716e-09	-1.63552e-10	-2.68522e-10	-3.24108e-10	-3.39704e-11	9.61566e-10	2.69928e-09	5.08668e-09	7.9511e-09	1.12984e-08
0.28633	-4.39024e-11	-2.80593e-11	-7.03006e-12	1.09329e-11	8.16113e-11	2.39116e-10	5.51651e-10	1.04495e-09	1.77951e-09	-1.60501e-10	-2.6854e-10	-3.24062e-10	-3.39522e-11	9.70643e-10	2.70232e-09	5.08512e-09	7.96174e-09	1.13135e-08
0.28658	-5.00755e-11	-3.11459e-11	-1.93763e-11	9.38966e-12	8.93277e-11	2.34486e-10	5.54737e-10	1.04958e-09	1.77796e-09	-1.57479e-10	-2.70056e-10	-3.19496e-10	-3.39613e-11	9.66095e-10	2.70986e-09	5.08359e-09	7.96181e-09	1.12832e-08
0.28683	-4.69889e-11	-2.49728e-11	-1.01166e-11	1.40195e-11	8.93277e-11	2.45289e-10	5.45478e-10	1.05884e-09	1.77642e-09	-1.65059e-10	-2.6854e-10	-3.20976e-10	-3.54682e-11	9.61511e-10	2.69319e-09	5.08514e-09	7.96331e-09	1.12983e-08
0.28708	-4.85322e-11	-2.80593e-11	-1.62898e-11	2.63658e-11	7.69814e-11	2.49919e-10	5.59367e-10	1.04804e-09	1.77488e-09	-1.60474e-10	-2.6854e-10	-3.17953e-10	-3.24726e-11	9.64507e-10	2.70376e-09	5.08972e-09	7.95872e-09	1.1303e-08
0.28733	-3.61859e-11	-3.26892e-11	-1.47465e-11	1.71061e-11	9.55008e-11	2.51462e-10	5.56281e-10	1.04958e-09	1.79031e-09	-1.51351e-10	-2.70102e-10	-3.2103e-10	-4.00162e-11	9.60013e-10	2.70232e-09	5.08977e-09	7.95568e-09	1.12984e-08
0.28758	-5.16188e-11	-2.6516e-11	-1.16599e-11	2.17359e-11	8.62411e-11	2.49919e-10	5.57824e-10	1.05113e-09	1.78568e-09	-1.60492e-10	-2.76175e-10	-3.28628e-10	-2.94134e-11	9.70643e-10	2.70537e-09	5.09278e-09	7.96175e-09	1.12969e-08
0.28783	-4.39024e-11	-2.6516e-11	-8.57335e-12	2.01926e-11	8.62411e-11	2.43745e-10	5.62454e-10	1.04495e-09	1.80266e-09	-1.68118e-10	-2.70111e-10	-3.21021e-10	-3.39431e-11	9.67611e-10	2.70692e-09	5.0867e-09	7.95877e-09	1.13121e-08
0.28808	-3.92725e-11	-2.80593e-11	-1.47465e-11	1.86494e-11	9.24142e-11	2.48375e-10	5.54737e-10	1.04804e-09	1.77179e-09	-1.58986e-10	-2.70056e-10	-3.16428e-10	-3.70388e-11	9.59995e-10	2.70843e-09	5.08669e-09	7.96487e-09	1.13e-08
0.288331	-4.08158e-11	-2.03429e-11	-1.32032e-11	2.32792e-11	8.0068e-11	2.48375e-10	5.56281e-10	1.0465e-09	1.78259e-09	-1.54374e-10	-2.67006e-10	-3.21012e-10	-4.01072e-11	9.64534e-10	2.70389e-09	5.09127e-09	7.96798e-09	1.13015e-08
0.288581	-4.69889e-11	-2.96026e-11	-8.57335e-12	1.40195e-11	9.0871e-11	2.54548e-10	5.54737e-10	1.05113e-09	1.77951e-09	-1.57388e-10	-2.67024e-10	-3.27121e-10	-4.01345e-11	9.66105e-10	2.70847e-09	5.09141e-09	7.97252e-09	1.1303e-08
0.288831	-4.23591e-11	-2.49728e-11	-7.03006e-12	7.84638e-12	8.46978e-11	2.48375e-10	5.54737e-10	1.05576e-09	1.77796e-09	-1.55935e-10	-2.73052e-10	-3.24153e-10	-4.16505e-11	9.69137e-10	2.71456e-09	5.1111e-09	7.9634e-09	1.13046e-08
0.289081	-4.54456e-11	-2.96026e-11	-8.57335e-12	6.30309e-12	8.62411e-11	2.42202e-10	5.53194e-10	1.04032e-09	1.78568e-09	-1.65068e-10	-2.60933e-10	-3.31715e-10	-4.01254e-11	9.64589e-10	2.70852e-09	5.08834e-09	7.96337e-09	1.13061e-08
0.289331	-3.77292e-11	-2.96026e-11	-1.16599e-11	1.86494e-11	8.31545e-11	2.48375e-10	5.62454e-10	1.04032e-09	1.77642e-09	-1.63561e-10	-2.68459e-10	-3.24117e-10	-3.86185e-11	9.66041e-10	2.71157e-09	5.08821e-09	7.96801e-09	1.13122e-08
0.289581	-3.92725e-11	-2.18862e-11	-7.03006e-12	1.86494e-11	8.31545e-11	2.43745e-10	5.63997e-10	1.05113e-09	1.78877e-09	-1.57488e-10	-2.63965e-10	-3.20985e-10	-4.313e-11	9.58497e-10	2.71764e-09	5.08977e-09	7.97858e-09	1.13091e-08
0.289831	-4.23591e-11	-2.6516e-11	-1.16599e-11	1.24762e-11	9.70441e-11	2.46832e-10	5.51651e-10	1.04032e-09	1.78722e-09	-1.63552e-10	-2.7002e-10	-3.14939e-10	-3.4025e-11	9.70643e-10	2.71005e-09	5.09437e-09	7.95581e-09	1.12985e-08
0.290081	-4.54456e-11	-1.87996e-11	-8.57335e-12	2.63658e-11	8.0068e-11	2.48375e-10	5.54737e-10	1.0465e-09	1.79185e-09	-1.63588e-10	-2.67024e-10	-3.27103e-10	-3.70297e-11	9.692e-10	2.71e-09	5.09745e-09	7.96336e-09	1.13076e-08
0.290331	-4.39024e-11	-2.6516e-11	-8.57335e-12	2.01926e-11	9.0871e-11	2.57635e-10	5.50107e-10	1.04495e-09	1.79031e-09	-1.63624e-10	-2.69993e-10	-3.27194e-10	-3.85912e-11	9.70716e-10	2.70854e-09	5.09745e-09	7.9741e-09	1.13031e-08
0.290581	-4.69889e-11	-2.49728e-11	-1.16599e-11	1.86494e-11	7.85247e-11	2.48375e-10	5.57824e-10	1.04804e-09	1.78722e-09	-1.69688e-10	-2.59335e-10	-3.30226e-10	-4.16232e-11	9.70716e-10	2.72065e-09	5.09442e-09	7.97723e-09	1.13091e-08
0.290831	-4.23591e-11	-2.6516e-11	-1.93763e-11	1.40195e-11	7.85247e-11	2.43745e-10	5.62454e-10	1.04804e-09	1.78722e-09	-1.63643e-10	-2.59354e-10	-3.27203e-10	-3.70115e-11	9.69228e-10	2.70699e-09	5.0974e-09	7.9803e-09	1.12985e-08
0.291081	-3.92725e-11	-1.87996e-11	-7.03006e-12	2.01926e-11	8.77844e-11	2.48375e-10	5.6091e-10	1.05267e-09	1.79185e-09	-1.66593e-10	-2.73043e-10	-3.28692e-10	-2.78246e-11	9.75291e-10	2.70549e-09	5.08986e-09	7.98036e-09	1.13061e-08
0.291331	-4.54456e-11	-2.80593e-11	-7.03006e-12	1.71061e-11	9.55008e-11	2.40659e-10	5.59367e-10	1.05576e-09	1.78568e-09	-1.56008e-10	-2.67024e-10	-3.25669e-10	-2.63359e-11	9.70734e-10	2.72226e-09	5.10047e-09	7.98645e-09	1.13107e-08
0.291581	-5.00755e-11	-2.34295e-11	-1.32032e-11	1.86494e-11	9.0871e-11	2.48375e-10	5.57824e-10	1.05113e-09	1.79031e-09	-1.681e-10	-2.6697e-10	-3.28683e-10	-4.1514e-11	9.67675e-10	2.7238e-09	5.09748e-09	7.98494e-09	1.13169e-08
0.291832	-4.54456e-11	-2.80593e-11	-8.57335e-12	2.17359e-11	8.46978e-11	2.48375e-10	5.47021e-10	1.04804e-09	1.78105e-09	-1.60574e-10	-2.63965e-10	-3.25624e-10	-3.09112e-11	9.70671e-10	2.7086e-09	5.09748e-09	7.98187e-09	1.13245e-08
0.292082	-4.08158e-11	-3.11459e-11	-1.62898e-11	1.71061e-11	8.93277e-11	2.46832e-10	5.47021e-10	1.04187e-09	1.78568e-09	-1.65095e-10	-2.71518e-10	-3.2103e-10	-2.78792e-11	9.64616e-10	2.71614e-09	5.10054e-09	7.98031e-09	1.13154e-08
0.292332	-4.69889e-11	-2.6516e-11	-1.47465e-11	2.01926e-11	8.93277e-11	2.46832e-10	5.57824e-10	1.05113e-09	1.78105e-09	-1.63579e-10	-2.62422e-10	-3.21003e-10	-4.15868e-11	9.69127e-10	2.71772e-09	5.10207e-09	7.97731e-09	1.13185e-08
0.292582	-3.92725e-11	-1.87996e-11	-1.01166e-11	1.71061e-11	8.93277e-11	2.46832e-10	5.56281e-10	1.0465e-09	1.79494e-09	-1.60529e-10	-2.63883e-10	-3.20985e-10	-4.16141e-11	9.64661e-10	2.71919e-09	5.09904e-09	7.98641e-09	1.1323e-08
0.292832	-3.46427e-11	-2.34295e-11	-3.9435e-12	1.55628e-11	9.0871e-11	2.51462e-10	5.56281e-10	1.03724e-09	1.78568e-09	-1.62072e-10	-2.62413e-10	-3.17971e-10	-3.24635e-11	9.78151e-10	2.7086e-09	5.10057e-09	7.98193e-09	1.13155e-08
0.293082	-4.54456e-11	-2.03429e-11	-8.57335e-12	1.09329e-11	8.46978e-11	2.48375e-10	5.59367e-10	1.04495e-09	1.79957e-09	-1.68145e-10	-2.69993e-10	-3.2408e-10	-3.2409e-11	9.43301e-10	2.72074e-09	5.10512e-09	7.98793e-09	1.13246e-08
0.293332	-3.77292e-11	-2.80593e-11	-1.16599e-11	1.86494e-11	8.46978e-11	2.42202e-10	5.59367e-10	1.05113e-09	1.79648e-09	-1.62081e-10	-2.63965e-10	-3.28683e-10	-3.24363e-11	9.67493e-10	2.7207e-09	5.09908e-09	7.97732e-09	1.13232e-08
0.293582	-4.54456e-11	-2.18862e-11	-7.03006e-12	1.40195e-11	8.46978e-11	2.51462e-10	5.6554e-10	1.04958e-09	1.79185e-09	-1.62036e-10	-2.68495e-10	-3.27158e-10	-3.70206e-11	9.67666e-10	2.70254e-09	5.1051e-09	7.9819e-09	1.13414e-08
0.293832	-4.85322e-11	-2.34295e-11	-1.32032e-11	1.40195e-11	9.0871e-11	2.48375e-10	5.57824e-10	1.04341e-09	1.79185e-09	-1.60592e-10	-2.66979e-10	-3.22574e-10	-3.85275e-11	9.72196e-10	2.72677e-09	5.09757e-09	7.99256e-09	1.13201e-08
0.294082	-5.31621e-11	-2.6516e-11	-3.9435e-12	1.09329e-11	8.16113e-11	2.49919e-10	5.6091e-10	1.04032e-09	1.7934e-09	-1.74255e-10	-2.64002e-10	-3.22555e-10	-3.09476e-11	9.6457e-10	2.71623e-09	5.10821e-09	7.98658e-09	1.13186e-08
0.294332	-4.39024e-11	-2.03429e-11	-7.03006e-12	2.01926e-11	8.62411e-11	2.46832e-10	5.53194e-10	1.04804e-09	1.78568e-09	-1.6525e-10	-2.77682e-10	-3.24099e-10	-3.69933e-11	9.59986e-10	2.71464e-09	5.10978e-09	7.99568e-09	1.13384e-08
0.294582	-3.61859e-11	-1.87996e-11	-1.16599e-11	1.86494e-11	8.31545e-11	2.48375e-10	5.62454e-10	1.03724e-09	1.78877e-09	-1.75789e-10	-2.73152e-10	-3.27112e-10	-3.54955e-11	9.66095e-10	2.71312e-09	5.10678e-09	7.99262e-09	1.13369e-08
0.294832	-5.00755e-11	-2.80593e-11	-1.16599e-11	1.71061e-11	8.16113e-11	2.51462e-10	5.53194e-10	1.05113e-09	1.78722e-09	-1.62145e-10	-2.67024e-10	-3.19542e-10	-3.40341e-11	9.72178e-10	2.71615e-09	5.11284e-09	7.98194e-09	1.13308e-08
0.295082	-4.85322e-11	-2.49728e-11	-1.32032e-11	1.40195e-11	8.46978e-11	2.40659e-10	5.54737e-10	1.04958e-09	1.78722e-09	-1.65095e-10	-2.66979e-10	-3.25569e-10	-4.61256e-11	9.63136e-10	2.71464e-09	5.10991e-09	7.98342e-09	1.13323e-08
0.295332	-4.39024e-11	-2.96026e-11	-5.48678e-12	2.01926e-11	9.24142e-11	2.57635e-10	5.54737e-10	1.05576e-09	1.79185e-09	-1.62099e-10	-2.65481e-10	-3.21012e-10	-2.94589e-11	9.75237e-10	2.71312e-09	5.12363e-09	7.98806e-09	1.13278e-08
0.295583	-4.69889e-11	-2.03429e-11	-1.01166e-11	1.55628e-11	8.46978e-11	2.57635e-10	5.63997e-10	1.03724e-09	1.7934e-09	-1.68191e-10	-2.70038e-10	-3.17935e-10	-3.55046e-11	9.67693e-10	2.7162e-09	5.1252e-09	7.9973e-09	1.13369e-08
0.295833	-5.00755e-11	-2.6516e-11	2.22964e-12	1.09329e-11	8.16113e-11	2.48375e-10	5.6091e-10	1.04495e-09	1.78414e-09	-1.6977e-10	-2.6855e-10	-3.17962e-10	-4.31119e-11	9.69173e-10	2.72232e-09	5.11905e-09	8.00643e-09	1.134e-08
0.296083	-4.69889e-11	-1.72563e-11	-8.57335e-12	1.71061e-11	8.46978e-11	2.57635e-10	5.7017e-10	1.04958e-09	1.79494e-09	-1.72766e-10	-2.70084e-10	-3.25596e-10	-3.39886e-11	9.69164e-10	2.72383e-09	5.10994e-09	7.99433e-09	1.13324e-08
0.296333	-5.00755e-11	-2.6516e-11	-8.57335e-12	1.71061e-11	8.16113e-11	2.39116e-10	5.6091e-10	1.04341e-09	1.78722e-09	-1.62136e-10	-2.73116e-10	-3.27176e-10	-3.09203e-11	9.66123e-10	2.71474e-09	5.122e-09	8.00188e-09	1.134e-08
0.296583	-4.08158e-11	-2.18862e-11	-1.32032e-11	1.40195e-11	9.24142e-11	2.49919e-10	5.6091e-10	1.05267e-09	1.7934e-09	-1.66656e-10	-2.68568e-10	-3.28683e-10	-3.70024e-11	9.67584e-10	2.72228e-09	5.10843e-09	8.00197e-09	1.1337e-08
0.296833	-4.54456e-11	-2.34295e-11	-5.48678e-12	1.86494e-11	8.16113e-11	2.48375e-10	5.62454e-10	1.06347e-09	1.78414e-09	-1.68209e-10	-2.70065e-10	-3.24126e-10	-3.70661e-11	9.60004e-10	2.71777e-09	5.12204e-09	8.00955e-09	1.134e-08
0.297083	-5.00755e-11	-2.6516e-11	-1.32032e-11	1.86494e-11	8.93277e-11	2.54548e-10	5.53194e-10	1.05576e-09	1.78105e-09	-1.68236e-10	-2.70065e-10	-3.25615e-10	-4.16505e-11	9.66077e-10	2.72085e-09	5.11603e-09	8.00198e-09	1.13324e-08
0.297333	-4.08158e-11	-2.6516e-11	-2.24629e-11	1.71061e-11	8.46978e-11	2.51462e-10	5.63997e-10	1.05113e-09	1.79185e-09	-1.71259e-10	-2.6855e-10	-3.24108e-10	-4.31664e-11	9.69146e-10	2.73147e-09	5.11742e-09	8.00346e-09	1.134e-08
0.297583	-5.31621e-11	-2.96026e-11	-7.03006e-12	1.71061e-11	8.46978e-11	2.49919e-10	5.57824e-10	1.0465e-09	1.78722e-09	-1.6672e-10	-2.70084e-10	-3.25578e-10	-3.71025e-11	9.66141e-10	2.71786e-09	5.10073e-09	8.00343e-09	1.13462e-08
0.297833	-4.23591e-11	-3.26892e-11	-7.03006e-12	1.71061e-11	9.55008e-11	2.45289e-10	5.63997e-10	1.05576e-09	1.78722e-09	-1.69716e-10	-2.73143e-10	-3.18026e-10	-4.15777e-11	9.70734e-10	2.72692e-09	5.11436e-09	7.99735e-09	1.13478e-08
0.298083	-4.39024e-11	-2.6516e-11	-1.01166e-11	1.09329e-11	9.24142e-11	2.54548e-10	5.57824e-10	1.04958e-09	1.79031e-09	-1.65186e-10	-2.73188e-10	-3.28638e-10	-3.09567e-11	9.76826e-10	2.72541e-09	5.11446e-09	8.00039e-09	1.13478e-08
0.298333	-4.54456e-11	-1.72563e-11	-1.16599e-11	1.71061e-11	7.85247e-11	2.46832e-10	5.48564e-10	1.05421e-09	1.78722e-09	-1.69752e-10	-2.77736e-10	-3.25624e-10	-3.54864e-11	9.7078e-10	2.71931e-09	5.11747e-09	8.00497e-09	1.13523e-08
0.298583	-4.08158e-11	-2.80593e-11	-1.16599e-11	7.84638e-12	9.24142e-11	2.45289e-10	5.67084e-10	1.06193e-09	1.78414e-09	-1.72811e-10	-2.73152e-10	-3.21094e-10	-3.85548e-11	9.73721e-10	2.72078e-09	5.11145e-09	8.00204e-09	1.13494e-08
0.298833	-4.54456e-11	-2.34295e-11	-1.7833e-11	2.01926e-11	8.77844e-11	2.53005e-10	5.50107e-10	1.04032e-09	1.78722e-09	-1.69779e-10	-2.66997e-10	-3.31697e-10	-3.70297e-11	9.61566e-10	2.71779e-09	5.12207e-09	8.01874e-09	1.13539e-08
0.299084	-3.92725e-11	-2.18862e-11	-1.47465e-11	1.86494e-11	8.62411e-11	2.53005e-10	5.56281e-10	1.05113e-09	1.78568e-09	-1.69725e-10	-2.62413e-10	-3.24171e-10	-3.40159e-11	9.66095e-10	2.72534e-09	5.1176e-09	8.00821e-09	1.13555e-08
0.299334	-3.61859e-11	-3.42325e-11	6.86356e-13	1.86494e-11	8.93277e-11	2.56092e-10	5.6091e-10	1.06347e-09	1.80111e-09	-1.63615e-10	-2.66943e-10	-3.30181e-10	-4.15777e-11	9.70707e-10	2.71629e-09	5.12514e-09	8.01578e-09	1.13662e-08
0.299584	-4.39024e-11	-2.18862e-11	-1.47465e-11	2.17359e-11	8.93277e-11	2.43745e-10	5.54737e-10	1.05113e-09	1.79494e-09	-1.62045e-10	-2.63974e-10	-3.22583e-10	-3.4025e-11	9.72178e-10	2.72537e-09	5.11456e-09	8.01733e-09	1.13707e-08
0.299834	-3.92725e-11	-2.34295e-11	-1.7833e-11	1.24762e-11	8.31545e-11	2.49919e-10	5.59367e-10	1.05267e-09	1.77642e-09	-1.60483e-10	-2.7307e-10	-3.21058e-10	-3.85639e-11	9.58534e-10	2.72239e-09	5.12365e-09	8.01429e-09	1.13434e-08
0.300084	-4.85322e-11	-1.87996e-11	-8.57335e-12	1.55628e-11	7.54381e-11	2.46832e-10	5.57824e-10	1.06193e-09	1.79494e-09	-1.5599e-10	-2.67043e-10	-3.28647e-10	-4.01163e-11	9.70625e-10	2.72538e-09	5.12366e-09	8.01435e-09	1.13585e-08
0.300334	-4.69889e-11	-2.03429e-11	-8.57335e-12	1.86494e-11	9.85874e-11	2.48375e-10	5.42391e-10	1.05267e-09	1.79648e-09	-1.71186e-10	-2.70075e-10	-3.2408e-10	-4.00435e-11	9.66141e-10	2.71785e-09	5.11604e-09	8.02802e-09	1.13601e-08
0.300584	-4.54456e-11	-2.49728e-11	-2.40021e-12	1.86494e-11	8.93277e-11	2.51462e-10	5.56281e-10	1.05576e-09	1.78877e-09	-1.66693e-10	-2.73125e-10	-3.17989e-10	-2.63541e-11	9.69146e-10	2.73148e-09	5.11754e-09	8.01737e-09	1.1357e-08
0.300834	-5.31621e-11	-2.49728e-11	3.77292e-12	1.09329e-11	8.16113e-11	2.53005e-10	5.57824e-10	1.04187e-09	1.78722e-09	-1.65104e-10	-2.70075e-10	-3.2409e-10	-3.24181e-11	9.66177e-10	2.72242e-09	5.12055e-09	8.00822e-09	1.1357e-08
0.301084	-3.92725e-11	-2.80593e-11	-5.48678e-12	2.32792e-11	9.24142e-11	2.53005e-10	5.62454e-10	1.05113e-09	1.81037e-09	-1.59031e-10	-2.66979e-10	-3.30135e-10	-3.9998e-11	9.76835e-10	2.72538e-09	5.11294e-09	8.0189e-09	1.13585e-08
0.301334	-4.08158e-11	-2.34295e-11	-7.03006e-12	2.32792e-11	8.31545e-11	2.54548e-10	5.73257e-10	1.05421e-09	1.78877e-09	-1.65059e-10	-2.62385e-10	-3.15021e-10	-2.63723e-11	9.76817e-10	2.71934e-09	5.11289e-09	8.02964e-09	1.13571e-08
0.301584	-5.16188e-11	-2.80593e-11	-1.62898e-11	1.24762e-11	8.31545e-11	2.51462e-10	5.6091e-10	1.05267e-09	1.78722e-09	-1.5904e-10	-2.62404e-10	-3.31688e-10	-3.545e-11	9.63182e-10	2.72534e-09	5.1114e-09	8.02963e-09	1.13617e-08
0.301834	-4.54456e-11	-2.49728e-11	-1.16599e-11	2.01926e-11	7.85247e-11	2.53005e-10	5.54737e-10	1.0573e-09	1.78568e-09	-1.66602e-10	-2.70002e-10	-3.28692e-10	-3.70752e-11	9.78314e-10	2.71477e-09	5.11757e-09	8.01748e-09	1.13724e-08
0.302084	-4.54456e-11	-2.34295e-11	-5.48678e-12	9.38966e-12	8.93277e-11	2.46832e-10	5.62454e-10	1.04958e-09	1.79031e-09	-1.6209e-10	-2.65463e-10	-3.21121e-10	-4.4646e-11	9.72296e-10	2.72685e-09	5.13121e-09	8.02509e-09	1.13694e-08
0.302334	-4.54456e-11	-2.6516e-11	-1.01166e-11	2.32792e-11	8.31545e-11	2.53005e-10	5.63997e-10	1.06502e-09	1.78722e-09	-1.65122e-10	-2.63911e-10	-3.33213e-10	-3.4025e-11	9.70734e-10	2.71627e-09	5.11002e-09	8.0358e-09	1.13709e-08
0.302585	-5.00755e-11	-3.11459e-11	-1.47465e-11	1.24762e-11	8.62411e-11	2.56092e-10	5.59367e-10	1.0573e-09	1.78722e-09	-1.66711e-10	-2.6392e-10	-3.22646e-10	-3.54773e-11	9.70753e-10	2.72078e-09	5.12363e-09	8.03438e-09	1.1371e-08
0.302835	-5.00755e-11	-2.03429e-11	-1.16599e-11	1.55628e-11	8.31545e-11	2.56092e-10	5.71713e-10	1.0573e-09	1.78414e-09	-1.74273e-10	-2.66924e-10	-3.28647e-10	-3.39704e-11	9.75282e-10	2.72079e-09	5.12521e-09	8.04043e-09	1.13816e-08
0.303085	-3.77292e-11	-2.34295e-11	-1.32032e-11	2.01926e-11	8.62411e-11	2.53005e-10	5.63997e-10	1.05576e-09	1.78414e-09	-1.62136e-10	-2.59399e-10	-3.22637e-10	-3.54955e-11	9.67712e-10	2.71782e-09	5.12063e-09	8.03438e-09	1.13726e-08
0.303335	-3.92725e-11	-2.80593e-11	6.86356e-13	1.09329e-11	8.46978e-11	2.54548e-10	5.56281e-10	1.05267e-09	1.7934e-09	-1.65131e-10	-2.73052e-10	-3.31706e-10	-3.70297e-11	9.72205e-10	2.73146e-09	5.11912e-09	8.03585e-09	1.13801e-08
0.303585	-3.77292e-11	-3.11459e-11	-1.01166e-11	1.24762e-11	8.62411e-11	2.49919e-10	5.57824e-10	1.0573e-09	1.79803e-09	-1.68227e-10	-2.6854e-10	-3.24181e-10	-3.70024e-11	9.66177e-10	2.71941e-09	5.12516e-09	8.03271e-09	1.13787e-08
0.303835	-4.08158e-11	-2.6516e-11	-8.5693e-13	2.17359e-11	8.93277e-11	2.48375e-10	5.6091e-10	1.05267e-09	1.79494e-09	-1.72748e-10	-2.65508e-10	-3.31815e-10	-3.09203e-11	9.73776e-10	2.73148e-09	5.1176e-09	8.016e-09	1.13878e-08
0.304085	-3.92725e-11	-1.87996e-11	-1.32032e-11	1.55628e-11	8.0068e-11	2.60721e-10	5.6554e-10	1.06965e-09	1.7934e-09	-1.6062e-10	-2.7307e-10	-3.40938e-10	-3.39795e-11	9.75301e-10	2.72085e-09	5.12218e-09	8.02963e-09	1.13741e-08
0.304335	-4.85322e-11	-2.03429e-11	-1.62898e-11	1.71061e-11	9.0871e-11	2.51462e-10	5.6091e-10	1.05421e-09	1.79957e-09	-1.68136e-10	-2.65508e-10	-3.28792e-10	-4.15868e-11	9.67675e-10	2.71622e-09	5.12981e-09	8.03125e-09	1.13725e-08
0.304585	-5.47053e-11	-1.87996e-11	-2.40021e-12	1.71061e-11	9.24142e-11	2.43745e-10	5.6554e-10	1.05113e-09	1.79803e-09	-1.62099e-10	-2.68513e-10	-3.28656e-10	-3.55228e-11	9.66132e-10	2.71926e-09	5.12686e-09	8.03283e-09	1.13832e-08
0.304835	-5.00755e-11	-1.87996e-11	-1.7833e-11	2.01926e-11	8.31545e-11	2.48375e-10	5.68627e-10	1.05421e-09	1.79957e-09	-1.65131e-10	-2.68513e-10	-3.18007e-10	-3.39795e-11	9.70716e-10	2.72078e-09	5.13599e-09	8.0404e-09	1.13879e-08
0.305085	-4.08158e-11	-1.72563e-11	-1.16599e-11	1.24762e-11	8.77844e-11	2.51462e-10	5.6091e-10	1.05421e-09	1.79957e-09	-1.68227e-10	-2.6549e-10	-3.22501e-10	-3.70479e-11	9.73794e-10	2.71778e-09	5.13599e-09	8.02979e-09	1.13909e-08
0.305335	-4.69889e-11	-2.49728e-11	-1.47465e-11	1.86494e-11	8.62411e-11	2.51462e-10	5.56281e-10	1.04958e-09	1.79957e-09	-1.72811e-10	-2.70056e-10	-3.19505e-10	-4.16141e-11	9.73757e-10	2.72382e-09	5.12693e-09	8.03426e-09	1.13864e-08
0.305585	-5.16188e-11	-2.6516e-11	-8.57335e-12	2.48225e-11	9.0871e-11	2.57635e-10	5.6554e-10	1.06039e-09	1.79803e-09	-1.71241e-10	-2.71518e-10	-3.24053e-10	-3.70479e-11	9.64607e-10	2.71779e-09	5.14207e-09	8.02674e-09	1.13833e-08
0.305835	-4.08158e-11	-2.34295e-11	-1.93763e-11	1.86494e-11	9.24142e-11	2.45289e-10	5.57824e-10	1.05576e-09	1.80729e-09	-1.59049e-10	-2.56376e-10	-3.2261e-10	-3.40068e-11	9.64616e-10	2.72232e-09	5.13146e-09	8.04036e-09	1.13833e-08
0.306085	-5.31621e-11	-2.96026e-11	-1.47465e-11	9.38966e-12	7.54381e-11	2.54548e-10	5.51651e-10	1.04958e-09	1.80266e-09	-1.62063e-10	-2.73052e-10	-3.31715e-10	-3.9998e-11	9.7521e-10	2.72236e-09	5.12841e-09	8.02983e-09	1.13956e-08
0.306336	-3.77292e-11	-2.18862e-11	-2.09196e-11	1.09329e-11	8.93277e-11	2.53005e-10	5.51651e-10	1.0573e-09	1.79031e-09	-1.68191e-10	-2.71627e-10	-3.2566e-10	-2.48745e-11	9.61566e-10	2.72389e-09	5.13898e-09	8.04042e-09	1.14032e-08
0.306586	-4.54456e-11	-3.26892e-11	2.22964e-12	1.40195e-11	8.46978e-11	2.54548e-10	5.57824e-10	1.05267e-09	1.80574e-09	-1.69779e-10	-2.71654e-10	-3.24062e-10	-4.00344e-11	9.64534e-10	2.72388e-09	5.1239e-09	8.03599e-09	1.13926e-08
0.306836	-4.85322e-11	-2.49728e-11	-1.01166e-11	1.40195e-11	9.0871e-11	2.53005e-10	5.59367e-10	1.05576e-09	1.8042e-09	-1.743e-10	-2.77755e-10	-3.18017e-10	-4.00799e-11	9.64607e-10	2.72085e-09	5.14203e-09	8.04964e-09	1.13941e-08
0.307086	-5.00755e-11	-2.80593e-11	-1.47465e-11	1.86494e-11	8.93277e-11	2.43745e-10	5.71713e-10	1.05113e-09	1.79957e-09	-1.63688e-10	-2.77709e-10	-3.28647e-10	-3.2509e-11	9.7373e-10	2.72393e-09	5.12845e-09	8.04207e-09	1.13971e-08
0.307336	-4.85322e-11	-2.6516e-11	-1.93763e-11	1.40195e-11	8.93277e-11	2.54548e-10	5.68627e-10	1.04958e-09	1.79031e-09	-1.69707e-10	-2.64038e-10	-3.27222e-10	-4.15686e-11	9.69164e-10	2.73308e-09	5.13446e-09	8.03742e-09	1.13956e-08
0.307586	-4.54456e-11	-3.26892e-11	-1.01166e-11	1.86494e-11	1.00131e-10	2.51462e-10	5.56281e-10	1.06039e-09	1.79031e-09	-1.66684e-10	-2.7307e-10	-3.33222e-10	-3.40523e-11	9.61557e-10	2.73006e-09	5.13292e-09	8.03286e-09	1.13941e-08
0.307836	-3.61859e-11	-2.80593e-11	-1.32032e-11	1.71061e-11	8.16113e-11	2.45289e-10	5.56281e-10	1.06039e-09	1.79648e-09	-1.65104e-10	-2.67034e-10	-3.18017e-10	-4.313e-11	9.69109e-10	2.72548e-09	5.12378e-09	8.04044e-09	1.14048e-08
0.308086	-6.70516e-11	-2.18862e-11	-1.7833e-11	1.40195e-11	8.93277e-11	2.57635e-10	5.62454e-10	1.06039e-09	1.79648e-09	-1.59013e-10	-2.68522e-10	-3.19478e-10	-3.86003e-11	9.6458e-10	2.72697e-09	5.12829e-09	8.03746e-09	1.14018e-08
0.308336	-4.08158e-11	-2.6516e-11	-8.57335e-12	1.71061e-11	9.39575e-11	2.46832e-10	5.56281e-10	1.06039e-09	1.80111e-09	-1.62063e-10	-2.68531e-10	-3.24044e-10	-3.70661e-11	9.6457e-10	2.72697e-09	5.12681e-09	8.0405e-09	1.14003e-08
0.308586	-5.47053e-11	-2.49728e-11	-7.03006e-12	2.32792e-11	8.77844e-11	2.48375e-10	5.63997e-10	1.06193e-09	1.80729e-09	-1.68163e-10	-2.68586e-10	-3.21039e-10	-4.00617e-11	9.67575e-10	2.7255e-09	5.12989e-09	8.04208e-09	1.14093e-08
0.308836	-5.31621e-11	-3.57757e-11	-1.01166e-11	1.55628e-11	8.46978e-11	2.60721e-10	5.63997e-10	1.05576e-09	1.79803e-09	-1.6515e-10	-2.777e-10	-3.24071e-10	-3.24726e-11	9.60004e-10	2.7346e-09	5.13606e-09	8.04824e-09	1.13942e-08
0.309086	-4.08158e-11	-2.80593e-11	-1.32032e-11	1.24762e-11	8.46978e-11	2.49919e-10	5.57824e-10	1.06502e-09	1.7934e-09	-1.65195e-10	-2.71709e-10	-3.24108e-10	-3.55137e-11	9.66095e-10	2.72702e-09	5.14368e-09	8.05738e-09	1.14002e-08
0.309336	-5.16188e-11	-1.72563e-11	-3.9435e-12	1.55628e-11	8.31545e-11	2.54548e-10	5.6091e-10	1.06193e-09	1.80111e-09	-1.75852e-10	-2.80723e-10	-3.27131e-10	-4.16232e-11	9.72187e-10	2.72544e-09	5.13762e-09	8.04981e-09	1.13956e-08
0.309586	-4.39024e-11	-2.80593e-11	-5.48678e-12	1.09329e-11	8.31545e-11	2.51462e-10	5.56281e-10	1.05884e-09	1.81346e-09	-1.72793e-10	-2.64038e-10	-3.22574e-10	-4.01436e-11	9.64643e-10	2.72395e-09	5.13613e-09	8.04973e-09	1.13956e-08
0.309837	-5.16188e-11	-1.87996e-11	-8.57335e-12	9.38966e-12	9.24142e-11	2.51462e-10	5.56281e-10	1.0573e-09	1.80111e-09	-1.60583e-10	-2.70065e-10	-3.22574e-10	-4.16323e-11	9.72214e-10	2.73153e-09	5.14822e-09	8.0437e-09	1.14018e-08
0.310087	-4.08158e-11	-2.80593e-11	-1.32032e-11	2.01926e-11	8.16113e-11	2.46832e-10	5.54737e-10	1.05267e-09	1.79648e-09	-1.62108e-10	-2.74695e-10	-3.27103e-10	-3.7057e-11	9.70725e-10	2.72545e-09	5.13153e-09	8.05583e-09	1.14033e-08
0.310337	-4.54456e-11	-2.6516e-11	-1.01166e-11	1.24762e-11	9.0871e-11	2.51462e-10	5.6091e-10	1.0573e-09	1.79803e-09	-1.74282e-10	-2.77727e-10	-3.19496e-10	-3.54864e-11	9.69218e-10	2.72087e-09	5.13302e-09	8.04983e-09	1.13988e-08
0.310587	-5.00755e-11	-2.49728e-11	-8.57335e-12	1.71061e-11	8.46978e-11	2.53005e-10	5.59367e-10	1.04958e-09	1.80266e-09	-1.68227e-10	-2.70084e-10	-3.17953e-10	-3.24908e-11	9.73766e-10	2.72696e-09	5.14521e-09	8.05435e-09	1.14094e-08
0.310837	-4.69889e-11	-2.96026e-11	-3.9435e-12	9.38966e-12	8.93277e-11	2.59178e-10	5.54737e-10	1.06039e-09	1.79185e-09	-1.6367e-10	-2.63947e-10	-3.2251e-10	-4.31119e-11	9.70771e-10	2.73e-09	5.14073e-09	8.05136e-09	1.14095e-08
0.311087	-4.69889e-11	-2.6516e-11	-7.03006e-12	7.84638e-12	8.62411e-11	2.51462e-10	5.62454e-10	1.05576e-09	1.79494e-09	-1.72748e-10	-2.65472e-10	-3.20985e-10	-3.70934e-11	9.7531e-10	2.72089e-09	5.14527e-09	8.0559e-09	1.14065e-08
0.311337	-5.31621e-11	-2.6516e-11	-1.16599e-11	1.71061e-11	8.93277e-11	2.53005e-10	5.6091e-10	1.05576e-09	1.80266e-09	-1.6514e-10	-2.71572e-10	-3.16437e-10	-4.00708e-11	9.72278e-10	2.7254e-09	5.14378e-09	8.05441e-09	1.1411e-08
0.311587	-4.85322e-11	-2.6516e-11	-1.16599e-11	2.01926e-11	8.77844e-11	2.48375e-10	5.62454e-10	1.06502e-09	1.80883e-09	-1.58995e-10	-2.70002e-10	-3.22455e-10	-3.39886e-11	9.70698e-10	2.72387e-09	5.14525e-09	8.05435e-09	1.1408e-08
0.311837	-4.54456e-11	-2.03429e-11	-1.47465e-11	2.17359e-11	8.62411e-11	2.46832e-10	5.6091e-10	1.06347e-09	1.81346e-09	-1.58995e-10	-2.56285e-10	-3.13387e-10	-3.39522e-11	9.64616e-10	2.7178e-09	5.13764e-09	8.04679e-09	1.14202e-08
0.312087	-4.39024e-11	-2.80593e-11	-1.01166e-11	2.01926e-11	9.24142e-11	2.59178e-10	5.7017e-10	1.04187e-09	1.80111e-09	-1.65077e-10	-2.59226e-10	-3.21003e-10	-3.40159e-11	9.69155e-10	2.72542e-09	5.13766e-09	8.05739e-09	1.14203e-08
0.312337	-4.08158e-11	-2.6516e-11	-1.16599e-11	2.17359e-11	8.77844e-11	2.51462e-10	5.62454e-10	1.05421e-09	1.80266e-09	-1.6209e-10	-2.54742e-10	-3.28638e-10	-4.46642e-11	9.69228e-10	2.73003e-09	5.14986e-09	8.05289e-09	1.14157e-08
0.312587	-4.69889e-11	-2.49728e-11	-1.16599e-11	1.09329e-11	8.77844e-11	2.49919e-10	5.63997e-10	1.05576e-09	1.81037e-09	-1.66629e-10	-2.66879e-10	-3.22564e-10	-4.01345e-11	9.76817e-10	2.72852e-09	5.14846e-09	8.05439e-09	1.14189e-08
0.312837	-4.39024e-11	-3.11459e-11	-8.57335e-12	2.17359e-11	8.0068e-11	2.57635e-10	5.748e-10	1.05113e-09	1.79494e-09	-1.63597e-10	-2.60915e-10	-3.19523e-10	-3.70752e-11	9.70743e-10	2.72548e-09	5.15759e-09	8.05439e-09	1.14417e-08
0.313087	-5.31621e-11	-2.49728e-11	-5.48678e-12	1.55628e-11	8.46978e-11	2.49919e-10	5.6554e-10	1.06193e-09	1.80883e-09	-1.62045e-10	-2.71481e-10	-3.27067e-10	-4.01254e-11	9.67721e-10	2.72849e-09	5.15606e-09	8.05288e-09	1.14235e-08
0.313338	-4.54456e-11	-2.6516e-11	-8.57335e-12	2.01926e-11	8.93277e-11	2.46832e-10	5.6091e-10	1.06656e-09	1.80574e-09	-1.60529e-10	-2.59372e-10	-3.16455e-10	-4.31482e-11	9.78305e-10	2.72542e-09	5.14695e-09	8.05594e-09	1.14249e-08
0.313588	-4.23591e-11	-1.72563e-11	-8.57335e-12	9.38966e-12	8.46978e-11	2.48375e-10	5.57824e-10	1.05576e-09	1.80574e-09	-1.63597e-10	-2.63874e-10	-3.19451e-10	-3.55774e-11	9.66141e-10	2.71931e-09	5.15449e-09	8.05902e-09	1.14265e-08
0.313838	-4.54456e-11	-1.57131e-11	-1.7833e-11	1.55628e-11	8.93277e-11	2.51462e-10	5.6091e-10	1.06193e-09	1.79957e-09	-1.68136e-10	-2.63892e-10	-3.20985e-10	-4.15868e-11	9.61602e-10	2.72091e-09	5.15002e-09	8.06058e-09	1.14327e-08
0.314088	-4.69889e-11	-2.6516e-11	-1.16599e-11	2.01926e-11	8.77844e-11	2.53005e-10	5.53194e-10	1.07582e-09	1.80266e-09	-1.5904e-10	-2.62358e-10	-3.19469e-10	-3.39977e-11	9.79839e-10	2.73918e-09	5.15911e-09	8.0636e-09	1.14418e-08
0.314338	-4.54456e-11	-2.96026e-11	-1.32032e-11	1.09329e-11	8.93277e-11	2.43745e-10	5.54737e-10	1.0573e-09	1.8042e-09	-1.63561e-10	-2.60824e-10	-3.19451e-10	-3.39522e-11	9.73803e-10	2.73317e-09	5.15303e-09	8.05748e-09	1.14326e-08
0.314588	-4.54456e-11	-2.96026e-11	-1.01166e-11	1.40195e-11	8.31545e-11	2.51462e-10	5.59367e-10	1.06193e-09	1.80266e-09	-1.63597e-10	-2.60806e-10	-3.18026e-10	-3.39067e-11	9.66168e-10	2.73002e-09	5.14846e-09	8.05143e-09	1.14235e-08
0.314838	-4.54456e-11	-2.49728e-11	-5.48678e-12	2.48225e-11	9.24142e-11	2.53005e-10	5.56281e-10	1.06193e-09	1.78877e-09	-1.65068e-10	-2.5929e-10	-3.34683e-10	-2.63723e-11	9.70698e-10	2.71938e-09	5.15456e-09	8.06504e-09	1.14295e-08
0.315088	-4.23591e-11	-2.49728e-11	-3.9435e-12	2.01926e-11	8.31545e-11	2.53005e-10	5.62454e-10	1.05267e-09	1.80574e-09	-1.5599e-10	-2.60851e-10	-3.16537e-10	-4.15231e-11	9.70671e-10	2.72853e-09	5.15917e-09	8.05146e-09	1.14311e-08
0.315338	-4.85322e-11	-2.34295e-11	-1.32032e-11	7.84638e-12	9.0871e-11	2.49919e-10	5.7017e-10	1.0681e-09	1.79648e-09	-1.66556e-10	-2.6844e-10	-3.25569e-10	-3.24999e-11	9.61529e-10	2.73921e-09	5.15913e-09	8.06203e-09	1.14265e-08
0.315588	-4.39024e-11	-2.96026e-11	-1.47465e-11	1.55628e-11	9.0871e-11	2.54548e-10	5.63997e-10	1.06502e-09	1.7934e-09	-1.5746e-10	-2.60842e-10	-3.24071e-10	-3.85548e-11	9.63018e-10	2.73016e-09	5.14851e-09	8.05907e-09	1.14341e-08
0.315838	-4.54456e-11	-2.34295e-11	-1.16599e-11	9.38966e-12	8.77844e-11	2.49919e-10	5.73257e-10	1.05884e-09	1.78722e-09	-1.55872e-10	-2.57765e-10	-3.19514e-10	-4.00799e-11	9.66105e-10	2.73621e-09	5.15756e-09	8.06365e-09	1.14265e-08
0.316088	-4.69889e-11	-2.03429e-11	-8.57335e-12	2.32792e-11	8.77844e-11	2.57635e-10	5.67084e-10	1.06193e-09	1.8042e-09	-1.54383e-10	-2.60824e-10	-3.24126e-10	-3.39977e-11	9.70634e-10	2.73775e-09	5.15152e-09	8.06663e-09	1.1431e-08
0.316338	-4.54456e-11	-2.6516e-11	-1.7833e-11	1.71061e-11	8.16113e-11	2.53005e-10	5.71713e-10	1.05113e-09	1.81037e-09	-1.61954e-10	-2.65427e-10	-3.34783e-10	-3.54409e-11	9.60004e-10	2.73316e-09	5.15152e-09	8.05152e-09	1.14219e-08
0.316588	-4.69889e-11	-1.72563e-11	-1.32032e-11	1.09329e-11	8.16113e-11	2.49919e-10	5.7017e-10	1.06193e-09	1.79031e-09	-1.54392e-10	-2.66988e-10	-3.27185e-10	-2.78701e-11	9.62972e-10	2.73011e-09	5.15758e-09	8.07121e-09	1.14295e-08
0.316839	-3.77292e-11	-2.6516e-11	-1.32032e-11	1.86494e-11	8.93277e-11	2.53005e-10	5.77887e-10	1.05267e-09	1.79957e-09	-1.57379e-10	-2.68522e-10	-3.21085e-10	-3.55046e-11	9.59977e-10	2.73317e-09	5.15149e-09	8.06375e-09	1.14295e-08
0.317089	-3.61859e-11	-2.80593e-11	-8.57335e-12	1.55628e-11	8.16113e-11	2.54548e-10	5.73257e-10	1.05421e-09	1.8042e-09	-1.54356e-10	-2.68531e-10	-3.28647e-10	-4.4646e-11	9.66032e-10	2.73922e-09	5.14696e-09	8.07133e-09	1.14265e-08
0.317339	-4.54456e-11	-2.34295e-11	-1.32032e-11	1.40195e-11	8.93277e-11	2.57635e-10	5.63997e-10	1.0573e-09	1.80883e-09	-1.55872e-10	-2.68522e-10	-3.24108e-10	-3.5541e-11	9.61575e-10	2.7271e-09	5.16062e-09	8.07138e-09	1.14357e-08
0.317589	-3.00128e-11	-2.03429e-11	-8.57335e-12	1.24762e-11	8.46978e-11	2.56092e-10	5.748e-10	1.06502e-09	1.8042e-09	-1.57442e-10	-2.66961e-10	-3.22637e-10	-3.39522e-11	9.75219e-10	2.7346e-09	5.15464e-09	8.07289e-09	1.14357e-08
0.317839	-3.92725e-11	-2.6516e-11	8.40277e-12	1.71061e-11	8.16113e-11	2.54548e-10	5.7017e-10	1.0573e-09	1.80574e-09	-1.63552e-10	-2.60888e-10	-3.36327e-10	-3.24817e-11	9.66132e-10	2.72553e-09	5.16065e-09	8.06978e-09	1.14296e-08
0.318089	-3.77292e-11	-1.87996e-11	-1.16599e-11	1.09329e-11	8.93277e-11	2.56092e-10	5.63997e-10	1.06502e-09	1.80574e-09	-1.63533e-10	-2.66915e-10	-3.31797e-10	-4.30937e-11	9.63036e-10	2.73156e-09	5.15151e-09	8.0591e-09	1.14357e-08
0.318339	-4.08158e-11	-2.49728e-11	-1.47465e-11	1.40195e-11	8.62411e-11	2.46832e-10	5.6554e-10	1.06656e-09	1.79957e-09	-1.5441e-10	-2.60879e-10	-3.2566e-10	-3.40796e-11	9.6458e-10	2.72864e-09	5.14691e-09	8.06059e-09	1.14358e-08
0.318589	-5.62486e-11	-1.87996e-11	-1.16599e-11	1.55628e-11	9.0871e-11	2.42202e-10	5.54737e-10	1.06502e-09	1.79494e-09	-1.58931e-10	-2.65408e-10	-3.24035e-10	-4.61802e-11	9.70652e-10	2.74539e-09	5.15296e-09	8.06524e-09	1.14495e-08
0.318839	-4.54456e-11	-3.42325e-11	-1.01166e-11	1.71061e-11	8.77844e-11	2.49919e-10	5.6554e-10	1.06193e-09	1.80266e-09	-1.59004e-10	-2.63947e-10	-3.13405e-10	-3.8664e-11	9.6458e-10	2.74391e-09	5.14842e-09	8.07746e-09	1.14404e-08
0.319089	-3.30994e-11	-2.34295e-11	-7.03006e-12	1.40195e-11	8.31545e-11	2.51462e-10	5.6554e-10	1.05576e-09	1.80574e-09	-1.66575e-10	-2.69993e-10	-3.22546e-10	-4.46824e-11	9.63082e-10	2.73477e-09	5.1484e-09	8.07452e-09	1.14419e-08
0.319339	-4.69889e-11	-2.6516e-11	-1.7833e-11	7.84638e-12	8.31545e-11	2.68438e-10	5.73257e-10	1.0681e-09	1.81346e-09	-1.57424e-10	-2.62422e-10	-3.31679e-10	-3.86276e-11	9.73648e-10	2.73778e-09	5.14991e-09	8.08213e-09	1.1445e-08
0.319589	-3.92725e-11	-2.03429e-11	-1.32032e-11	1.09329e-11	8.77844e-11	2.60721e-10	5.67084e-10	1.06656e-09	1.80883e-09	-1.49744e-10	-2.65454e-10	-3.19578e-10	-4.00526e-11	9.5699e-10	2.73924e-09	5.14692e-09	8.08218e-09	1.14495e-08
0.319839	-5.16188e-11	-1.72563e-11	-1.01166e-11	1.24762e-11	8.62411e-11	2.51462e-10	5.6554e-10	1.06039e-09	1.815e-09	-1.49735e-10	-2.69993e-10	-3.27121e-10	-2.94771e-11	9.66041e-10	2.7256e-09	5.15602e-09	8.08368e-09	1.14419e-08
0.320089	-4.85322e-11	-2.03429e-11	-3.9435e-12	1.09329e-11	8.93277e-11	2.49919e-10	5.67084e-10	1.05267e-09	1.80729e-09	-1.55826e-10	-2.60897e-10	-3.25596e-10	-4.46005e-11	9.66068e-10	2.73926e-09	5.15005e-09	8.07911e-09	1.1442e-08
0.320339	-4.69889e-11	-1.72563e-11	-1.01166e-11	1.40195e-11	8.93277e-11	2.48375e-10	5.6554e-10	1.07428e-09	1.815e-09	-1.54438e-10	-2.65436e-10	-3.17944e-10	-3.39977e-11	9.61548e-10	2.74241e-09	5.16216e-09	8.07755e-09	1.14558e-08
0.32059	-4.69889e-11	-2.80593e-11	-1.01166e-11	2.17359e-11	8.46978e-11	2.57635e-10	5.62454e-10	1.05884e-09	1.79031e-09	-1.71168e-10	-2.68504e-10	-3.14894e-10	-3.09567e-11	9.70607e-10	2.74389e-09	5.1531e-09	8.07605e-09	1.14634e-08
0.32084	-4.23591e-11	-1.10832e-11	-5.48678e-12	1.71061e-11	8.77844e-11	2.54548e-10	5.6554e-10	1.06039e-09	1.79031e-09	-1.65159e-10	-2.66943e-10	-3.22446e-10	-4.313e-11	9.60022e-10	2.73479e-09	5.15608e-09	8.08222e-09	1.14466e-08
0.32109	-3.30994e-11	-2.80593e-11	-1.01166e-11	2.01926e-11	8.62411e-11	2.49919e-10	5.7017e-10	1.06502e-09	1.79494e-09	-1.63543e-10	-2.57774e-10	-3.13414e-10	-4.16687e-11	9.66086e-10	2.74079e-09	5.15458e-09	8.09597e-09	1.14451e-08
0.32134	-5.31621e-11	-2.34295e-11	-1.32032e-11	1.40195e-11	8.77844e-11	2.56092e-10	5.62454e-10	1.06347e-09	1.80729e-09	-1.54447e-10	-2.56249e-10	-3.25551e-10	-4.00981e-11	9.7068e-10	2.73328e-09	5.15459e-09	8.09441e-09	1.14573e-08
0.32159	-4.08158e-11	-2.34295e-11	-1.62898e-11	2.01926e-11	8.62411e-11	2.46832e-10	5.76343e-10	1.06656e-09	1.7934e-09	-1.65059e-10	-2.65381e-10	-3.24162e-10	-3.39886e-11	9.67684e-10	2.74693e-09	5.1576e-09	8.07467e-09	1.14573e-08
0.32184	-4.54456e-11	-2.80593e-11	-8.57335e-12	1.71061e-11	8.77844e-11	2.46832e-10	5.748e-10	1.06193e-09	1.81346e-09	-1.6357e-10	-2.63865e-10	-3.34729e-10	-3.39613e-11	9.72241e-10	2.74091e-09	5.15157e-09	8.08977e-09	1.14451e-08
0.32209	-4.08158e-11	-2.49728e-11	-1.47465e-11	2.63658e-11	8.46978e-11	2.62265e-10	5.68627e-10	1.06502e-09	1.81037e-09	-1.58967e-10	-2.5624e-10	-3.1808e-10	-3.54136e-11	9.72241e-10	2.74084e-09	5.16067e-09	8.08378e-09	1.14497e-08
0.32234	-4.69889e-11	-2.34295e-11	-1.32032e-11	1.24762e-11	8.46978e-11	2.42202e-10	5.71713e-10	1.07119e-09	1.80883e-09	-1.55899e-10	-2.57765e-10	-3.2861e-10	-2.3313e-11	9.67666e-10	2.73629e-09	5.15769e-09	8.08828e-09	1.14649e-08
0.32259	-4.39024e-11	-2.80593e-11	-5.48678e-12	1.86494e-11	8.62411e-11	2.51462e-10	5.68627e-10	1.07273e-09	1.80729e-09	-1.57433e-10	-2.65354e-10	-3.21058e-10	-3.84547e-11	9.67611e-10	2.73934e-09	5.16071e-09	8.08226e-09	1.14589e-08
0.32284	-4.69889e-11	-2.18862e-11	-1.93763e-11	1.55628e-11	8.62411e-11	2.54548e-10	5.63997e-10	1.06502e-09	1.80111e-09	-1.61954e-10	-2.57783e-10	-3.2251e-10	-3.24726e-11	9.63036e-10	2.7439e-09	5.15924e-09	8.08982e-09	1.14543e-08
0.32309	-5.00755e-11	-2.03429e-11	-2.40021e-12	2.32792e-11	8.46978e-11	2.51462e-10	5.67084e-10	1.05884e-09	1.80266e-09	-1.51387e-10	-2.5929e-10	-3.17998e-10	-3.70388e-11	9.63073e-10	2.73935e-09	5.16531e-09	8.08533e-09	1.14604e-08
0.32334	-3.77292e-11	-2.18862e-11	-1.47465e-11	1.09329e-11	8.62411e-11	2.51462e-10	5.67084e-10	1.06965e-09	1.81655e-09	-1.65013e-10	-2.63874e-10	-3.27121e-10	-4.1605e-11	9.73766e-10	2.73782e-09	5.16074e-09	8.09138e-09	1.14635e-08
0.32359	-4.54456e-11	-1.57131e-11	-1.01166e-11	1.86494e-11	8.31545e-11	2.46832e-10	5.63997e-10	1.07273e-09	1.8042e-09	-1.58986e-10	-2.63883e-10	-3.27203e-10	-3.55501e-11	9.76835e-10	2.7424e-09	5.15615e-09	8.08838e-09	1.14681e-08
0.32384	-4.69889e-11	-2.49728e-11	-8.57335e-12	1.55628e-11	8.16113e-11	2.56092e-10	5.76343e-10	1.06502e-09	1.81192e-09	-1.57433e-10	-2.60797e-10	-3.31733e-10	-3.8573e-11	9.69228e-10	2.74389e-09	5.1576e-09	8.08998e-09	1.1459e-08
0.324091	-4.23591e-11	-2.18862e-11	-1.16599e-11	1.24762e-11	8.93277e-11	2.49919e-10	5.76343e-10	1.07428e-09	1.80111e-09	-1.58958e-10	-2.54696e-10	-3.24153e-10	-4.00981e-11	9.69182e-10	2.73474e-09	5.15007e-09	8.10673e-09	1.14666e-08
0.324341	-5.00755e-11	-1.26265e-11	-1.47465e-11	2.01926e-11	8.77844e-11	2.48375e-10	5.73257e-10	1.06965e-09	1.79648e-09	-1.60547e-10	-2.57747e-10	-3.27176e-10	-3.71116e-11	9.69173e-10	2.73322e-09	5.16528e-09	8.1007e-09	1.14712e-08
0.324591	-4.85322e-11	-2.18862e-11	-1.16599e-11	1.86494e-11	8.62411e-11	2.53005e-10	5.7017e-10	1.0681e-09	1.79494e-09	-1.69652e-10	-2.63865e-10	-3.30199e-10	-4.61984e-11	9.67666e-10	2.74232e-09	5.16533e-09	8.09606e-09	1.14728e-08
0.324841	-3.61859e-11	-2.03429e-11	-8.57335e-12	1.40195e-11	7.85247e-11	2.56092e-10	5.63997e-10	1.06656e-09	1.80266e-09	-1.60565e-10	-2.63883e-10	-3.22583e-10	-3.85912e-11	9.70671e-10	2.73629e-09	5.15924e-09	8.08995e-09	1.14773e-08
0.325091	-5.00755e-11	-2.03429e-11	-1.32032e-11	1.24762e-11	8.93277e-11	2.51462e-10	5.73257e-10	1.07891e-09	1.8042e-09	-1.62063e-10	-2.60842e-10	-3.2103e-10	-3.24908e-11	9.64616e-10	2.73782e-09	5.16077e-09	8.09302e-09	1.14713e-08
0.325341	-4.23591e-11	-2.6516e-11	-1.32032e-11	1.71061e-11	9.0871e-11	2.48375e-10	5.71713e-10	1.0681e-09	1.79185e-09	-1.66593e-10	-2.62376e-10	-3.24044e-10	-4.00526e-11	9.69109e-10	2.74543e-09	5.16684e-09	8.10367e-09	1.14818e-08
0.325591	-4.69889e-11	-1.72563e-11	-5.48678e-12	2.01926e-11	8.0068e-11	2.54548e-10	5.63997e-10	1.07119e-09	1.815e-09	-1.5747e-10	-2.66933e-10	-3.19532e-10	-3.55319e-11	9.61502e-10	2.74086e-09	5.16085e-09	8.09612e-09	1.14607e-08
0.325841	-4.69889e-11	-2.6516e-11	-8.57335e-12	1.55628e-11	8.62411e-11	2.51462e-10	5.68627e-10	1.07428e-09	1.80266e-09	-1.57506e-10	-2.62385e-10	-3.27103e-10	-3.70115e-11	9.59959e-10	2.73474e-09	5.17294e-09	8.09764e-09	1.14804e-08
0.326091	-4.23591e-11	-2.80593e-11	-1.47465e-11	1.09329e-11	7.85247e-11	2.51462e-10	5.7017e-10	1.08199e-09	1.81037e-09	-1.72657e-10	-2.62349e-10	-3.22574e-10	-3.39522e-11	9.64516e-10	2.73626e-09	5.1608e-09	8.1037e-09	1.14881e-08
0.326341	-5.00755e-11	-2.6516e-11	-7.03006e-12	1.86494e-11	9.39575e-11	2.56092e-10	5.8406e-10	1.06965e-09	1.81192e-09	-1.55917e-10	-2.60851e-10	-3.22546e-10	-3.09112e-11	9.63073e-10	2.74085e-09	5.15923e-09	8.09616e-09	1.14759e-08
0.326591	-4.08158e-11	-2.49728e-11	-7.03006e-12	1.71061e-11	8.0068e-11	2.43745e-10	5.6091e-10	1.06656e-09	1.79648e-09	-1.46739e-10	-2.6539e-10	-3.22555e-10	-3.54864e-11	9.72178e-10	2.74235e-09	5.16385e-09	8.10376e-09	1.14728e-08
0.326841	-4.39024e-11	-2.18862e-11	-1.47465e-11	1.86494e-11	8.31545e-11	2.48375e-10	5.71713e-10	1.0681e-09	1.79957e-09	-1.58867e-10	-2.60851e-10	-3.24099e-10	-3.8573e-11	9.66123e-10	2.73323e-09	5.17302e-09	8.10838e-09	1.14744e-08
0.327091	-3.46427e-11	-2.03429e-11	-1.93763e-11	1.40195e-11	8.77844e-11	2.48375e-10	5.63997e-10	1.07273e-09	1.79648e-09	-1.55881e-10	-2.62349e-10	-3.27149e-10	-4.00799e-11	9.6457e-10	2.73625e-09	5.17157e-09	8.10839e-09	1.14912e-08
0.327341	-4.39024e-11	-2.49728e-11	-8.57335e-12	1.71061e-11	8.46978e-11	2.49919e-10	5.73257e-10	1.06347e-09	1.79494e-09	-1.54337e-10	-2.62349e-10	-3.25624e-10	-3.39886e-11	9.66086e-10	2.74087e-09	5.17449e-09	8.10533e-09	1.14852e-08
0.327592	-4.69889e-11	-2.34295e-11	-1.32032e-11	1.40195e-11	8.62411e-11	2.46832e-10	5.71713e-10	1.0681e-09	1.8042e-09	-1.54356e-10	-2.60806e-10	-3.2251e-10	-3.39613e-11	9.66123e-10	2.74541e-09	5.15478e-09	8.10228e-09	1.14927e-08
0.327842	-3.92725e-11	-3.26892e-11	-1.16599e-11	1.09329e-11	8.77844e-11	2.48375e-10	5.68627e-10	1.06039e-09	1.80111e-09	-1.58931e-10	-2.57737e-10	-3.13514e-10	-3.55137e-11	9.70662e-10	2.73483e-09	5.16987e-09	8.10684e-09	1.14836e-08
0.328092	-5.31621e-11	-2.6516e-11	-1.32032e-11	1.09329e-11	8.0068e-11	2.53005e-10	5.71713e-10	1.07582e-09	1.815e-09	-1.58958e-10	-2.56185e-10	-3.42354e-10	-4.01072e-11	9.64616e-10	2.7453e-09	5.16387e-09	8.10691e-09	1.14851e-08
0.328342	-4.39024e-11	-2.03429e-11	-1.47465e-11	1.71061e-11	8.93277e-11	2.43745e-10	5.748e-10	1.07582e-09	1.815e-09	-1.58949e-10	-2.54687e-10	-3.28774e-10	-4.16505e-11	9.69164e-10	2.72263e-09	5.16542e-09	8.11453e-09	1.14913e-08
0.328592	-4.39024e-11	-2.03429e-11	-1.47465e-11	1.40195e-11	9.0871e-11	2.49919e-10	5.6091e-10	1.06656e-09	1.80883e-09	-1.57415e-10	-2.60806e-10	-3.2409e-10	-4.01436e-11	9.70671e-10	2.74528e-09	5.17453e-09	8.11302e-09	1.14913e-08
0.328842	-4.08158e-11	-2.6516e-11	-1.01166e-11	1.71061e-11	9.55008e-11	2.49919e-10	5.76343e-10	1.07119e-09	1.80729e-09	-1.55863e-10	-2.65436e-10	-3.19523e-10	-4.15777e-11	9.63045e-10	2.73179e-09	5.16698e-09	8.10844e-09	1.14943e-08
0.329092	-3.61859e-11	-2.34295e-11	-1.16599e-11	1.40195e-11	8.77844e-11	2.46832e-10	5.80973e-10	1.07428e-09	1.79957e-09	-1.52821e-10	-2.68504e-10	-3.25569e-10	-2.79156e-11	9.61584e-10	2.74843e-09	5.17005e-09	8.10846e-09	1.14929e-08
0.329342	-4.08158e-11	-3.7319e-11	-8.57335e-12	2.17359e-11	8.31545e-11	2.43745e-10	5.73257e-10	1.06656e-09	1.80729e-09	-1.55844e-10	-2.66943e-10	-3.21048e-10	-3.69842e-11	9.79812e-10	2.73943e-09	5.18225e-09	8.11606e-09	1.1505e-08
0.329592	-3.92725e-11	-2.49728e-11	-1.32032e-11	1.55628e-11	7.85247e-11	2.51462e-10	5.63997e-10	1.07119e-09	1.79803e-09	-1.54319e-10	-2.57801e-10	-3.2409e-10	-3.70297e-11	9.69264e-10	2.74699e-09	5.17773e-09	8.11307e-09	1.14945e-08
0.329842	-5.00755e-11	-2.6516e-11	-1.01166e-11	1.09329e-11	8.31545e-11	2.40659e-10	5.71713e-10	1.06965e-09	1.80729e-09	-1.51251e-10	-2.60815e-10	-3.27112e-10	-3.54955e-11	9.7225e-10	2.7455e-09	5.17615e-09	8.1145e-09	1.14989e-08
0.330092	-3.92725e-11	-1.72563e-11	-1.32032e-11	1.40195e-11	8.0068e-11	2.51462e-10	5.77887e-10	1.07582e-09	1.81037e-09	-1.49735e-10	-2.63883e-10	-3.19523e-10	-3.3934e-11	9.72269e-10	2.74396e-09	5.17162e-09	8.10237e-09	1.14884e-08
0.330342	-4.54456e-11	-2.6516e-11	-3.9435e-12	2.01926e-11	9.24142e-11	2.54548e-10	5.748e-10	1.06965e-09	1.80111e-09	-1.54292e-10	-2.63865e-10	-3.22537e-10	-2.94043e-11	9.72259e-10	2.74241e-09	5.1792e-09	8.11304e-09	1.15112e-08
0.330592	-4.39024e-11	-2.6516e-11	-1.47465e-11	2.32792e-11	8.31545e-11	2.51462e-10	5.59367e-10	1.06965e-09	1.81192e-09	-1.52803e-10	-2.5781e-10	-3.2409e-10	-3.84911e-11	9.7068e-10	2.74088e-09	5.17776e-09	8.12378e-09	1.15006e-08
0.330842	-5.00755e-11	-3.11459e-11	-1.32032e-11	1.71061e-11	8.93277e-11	2.51462e-10	5.71713e-10	1.0681e-09	1.81346e-09	-1.54328e-10	-2.6539e-10	-3.25633e-10	-3.25272e-11	9.61529e-10	2.7409e-09	5.18384e-09	8.12382e-09	1.15036e-08
0.331092	-4.69889e-11	-2.18862e-11	-2.40021e-12	2.01926e-11	7.85247e-11	2.49919e-10	5.68627e-10	1.07891e-09	1.80111e-09	-1.55835e-10	-2.63901e-10	-3.27167e-10	-4.61347e-11	9.63064e-10	2.74547e-09	5.18236e-09	8.11931e-09	1.14991e-08
0.331343	-4.54456e-11	-3.11459e-11	-2.09196e-11	1.55628e-11	8.77844e-11	2.51462e-10	5.77887e-10	1.07119e-09	1.81346e-09	-1.51287e-10	-2.62367e-10	-3.27149e-10	-3.25181e-11	9.73675e-10	2.74549e-09	5.18382e-09	8.12994e-09	1.15051e-08
0.331593	-5.16188e-11	-2.18862e-11	-1.47465e-11	1.40195e-11	8.31545e-11	2.53005e-10	5.67084e-10	1.07273e-09	1.79957e-09	-1.54328e-10	-2.62349e-10	-3.22583e-10	-3.70206e-11	9.61602e-10	2.74397e-09	5.17325e-09	8.12686e-09	1.15037e-08
0.331843	-4.39024e-11	-1.57131e-11	-1.16599e-11	2.01926e-11	8.77844e-11	2.49919e-10	5.7017e-10	1.07582e-09	1.81037e-09	-1.5736e-10	-2.60797e-10	-3.24144e-10	-3.85821e-11	9.72205e-10	2.744e-09	5.18995e-09	8.11168e-09	1.15051e-08
0.332093	-4.39024e-11	-3.11459e-11	-3.9435e-12	1.40195e-11	8.16113e-11	2.46832e-10	5.748e-10	1.06502e-09	1.79648e-09	-1.51287e-10	-2.56267e-10	-3.34765e-10	-4.00981e-11	9.72205e-10	2.75157e-09	5.18849e-09	8.12673e-09	1.1499e-08
0.332343	-5.47053e-11	-2.49728e-11	-1.01166e-11	1.09329e-11	7.69814e-11	2.46832e-10	5.71713e-10	1.0681e-09	1.8042e-09	-1.52821e-10	-2.65372e-10	-3.24171e-10	-3.70479e-11	9.61629e-10	2.74251e-09	5.18235e-09	8.10853e-09	1.14975e-08
0.332593	-4.23591e-11	-2.34295e-11	-1.32032e-11	1.71061e-11	8.46978e-11	2.48375e-10	5.6554e-10	1.06965e-09	1.81963e-09	-1.60438e-10	-2.62376e-10	-3.27131e-10	-3.55501e-11	9.78287e-10	2.75011e-09	5.17624e-09	8.10999e-09	1.15098e-08
0.332843	-5.16188e-11	-1.87996e-11	-1.62898e-11	1.09329e-11	8.46978e-11	2.51462e-10	5.748e-10	1.06656e-09	1.815e-09	-1.57388e-10	-2.62367e-10	-3.22546e-10	-4.31028e-11	9.69246e-10	2.75466e-09	5.18079e-09	8.11763e-09	1.15129e-08
0.333093	-4.54456e-11	-3.26892e-11	-1.47465e-11	1.40195e-11	8.46978e-11	2.57635e-10	5.62454e-10	1.06502e-09	1.815e-09	-1.49789e-10	-2.63901e-10	-3.17953e-10	-3.25181e-11	9.70716e-10	2.74246e-09	5.18383e-09	8.11919e-09	1.15114e-08
0.333343	-3.61859e-11	-2.03429e-11	-7.03006e-12	2.01926e-11	8.31545e-11	2.48375e-10	5.7017e-10	1.07582e-09	1.815e-09	-1.57297e-10	-2.65408e-10	-3.1946e-10	-4.01072e-11	9.70734e-10	2.73784e-09	5.17629e-09	8.11616e-09	1.15174e-08
0.333593	-4.39024e-11	-2.03429e-11	-3.9435e-12	1.40195e-11	8.16113e-11	2.49919e-10	5.7943e-10	1.08045e-09	1.81192e-09	-1.45305e-10	-2.6087e-10	-3.21012e-10	-4.46733e-11	9.72269e-10	2.74244e-09	5.18842e-09	8.11764e-09	1.14945e-08
0.333843	-4.69889e-11	-1.26265e-11	-3.9435e-12	1.55628e-11	8.93277e-11	2.46832e-10	5.76343e-10	1.08045e-09	1.80883e-09	-1.72593e-10	-2.65408e-10	-3.24071e-10	-3.55683e-11	9.73785e-10	2.75157e-09	5.18392e-09	8.11465e-09	1.15006e-08
0.334093	-4.69889e-11	-1.87996e-11	-5.48678e-12	1.55628e-11	8.31545e-11	2.53005e-10	5.76343e-10	1.06039e-09	1.815e-09	-1.57533e-10	-2.63911e-10	-3.24062e-10	-3.86094e-11	9.70771e-10	2.74403e-09	5.1839e-09	8.1223e-09	1.15113e-08
0.334343	-4.23591e-11	-2.03429e-11	-7.03006e-12	1.40195e-11	7.69814e-11	2.51462e-10	5.68627e-10	1.06193e-09	1.815e-09	-1.6199e-10	-2.63847e-10	-3.19496e-10	-4.62075e-11	9.75264e-10	2.74859e-09	5.18541e-09	8.12986e-09	1.15053e-08
0.334593	-4.39024e-11	-1.57131e-11	-1.62898e-11	2.17359e-11	9.24142e-11	2.48375e-10	5.6554e-10	1.05576e-09	1.81346e-09	-1.57479e-10	-2.54751e-10	-3.20994e-10	-3.8573e-11	9.6468e-10	2.75314e-09	5.18235e-09	8.1117e-09	1.15129e-08
0.334844	-5.16188e-11	-2.49728e-11	-1.32032e-11	2.01926e-11	9.55008e-11	2.48375e-10	5.73257e-10	1.05884e-09	1.815e-09	-1.63461e-10	-2.63838e-10	-3.20985e-10	-2.95317e-11	9.75291e-10	2.74407e-09	5.17932e-09	8.12687e-09	1.15175e-08
0.335094	-4.54456e-11	-2.80593e-11	-8.57335e-12	1.86494e-11	8.16113e-11	2.49919e-10	5.76343e-10	1.06502e-09	1.815e-09	-1.48283e-10	-2.62376e-10	-3.17953e-10	-5.52489e-11	9.75319e-10	2.75313e-09	5.18696e-09	8.1315e-09	1.15129e-08
0.335344	-4.54456e-11	-3.42325e-11	-2.40021e-12	1.55628e-11	8.93277e-11	2.57635e-10	5.68627e-10	1.07273e-09	1.81963e-09	-1.54274e-10	-2.63901e-10	-3.20994e-10	-2.9559e-11	9.69255e-10	2.74705e-09	5.19158e-09	8.12542e-09	1.15129e-08
0.335594	-4.23591e-11	-2.80593e-11	-7.03006e-12	2.17359e-11	8.62411e-11	2.48375e-10	5.76343e-10	1.06502e-09	1.815e-09	-1.5126e-10	-2.65417e-10	-3.22519e-10	-4.30846e-11	9.7531e-10	2.74249e-09	5.19159e-09	8.1238e-09	1.15205e-08
0.335844	-4.08158e-11	-2.80593e-11	-1.01166e-11	1.55628e-11	8.0068e-11	2.54548e-10	5.73257e-10	1.06656e-09	1.81192e-09	-1.51269e-10	-2.62358e-10	-3.19532e-10	-3.55319e-11	9.73812e-10	2.75009e-09	5.18851e-09	8.11472e-09	1.15175e-08
0.336094	-5.31621e-11	-3.26892e-11	-1.62898e-11	1.71061e-11	8.46978e-11	2.56092e-10	5.76343e-10	1.07582e-09	1.81346e-09	-1.55863e-10	-2.59344e-10	-3.28656e-10	-3.40159e-11	9.72269e-10	2.75164e-09	5.18397e-09	8.12829e-09	1.15145e-08
0.336344	-4.39024e-11	-2.03429e-11	-8.57335e-12	2.01926e-11	8.62411e-11	2.51462e-10	5.73257e-10	1.0681e-09	1.80883e-09	-1.58895e-10	-2.68449e-10	-3.27158e-10	-4.30846e-11	9.70771e-10	2.74709e-09	5.19309e-09	8.11168e-09	1.15175e-08
0.336594	-4.23591e-11	-2.49728e-11	-7.03006e-12	1.55628e-11	8.62411e-11	2.45289e-10	5.7017e-10	1.0681e-09	1.81809e-09	-1.51287e-10	-2.63929e-10	-3.22601e-10	-3.09385e-11	9.76807e-10	2.75011e-09	5.19316e-09	8.12528e-09	1.15221e-08
0.336844	-4.69889e-11	-2.03429e-11	-5.48678e-12	2.32792e-11	8.77844e-11	2.36029e-10	5.77887e-10	1.07273e-09	1.815e-09	-1.51205e-10	-2.6392e-10	-3.27067e-10	-3.09203e-11	9.67739e-10	2.7501e-09	5.19465e-09	8.12082e-09	1.15176e-08
0.337094	-4.69889e-11	-2.18862e-11	-1.16599e-11	1.24762e-11	8.16113e-11	2.42202e-10	5.73257e-10	1.06965e-09	1.815e-09	-1.45178e-10	-2.66979e-10	-3.1345e-10	-4.00708e-11	9.75301e-10	2.74555e-09	5.18854e-09	8.12689e-09	1.15236e-08
0.337344	-4.54456e-11	-2.49728e-11	-8.57335e-12	9.38966e-12	8.46978e-11	2.43745e-10	5.76343e-10	1.06965e-09	1.81655e-09	-1.57351e-10	-2.68486e-10	-3.27076e-10	-4.01527e-11	9.73803e-10	2.74859e-09	5.18551e-09	8.12541e-09	1.15206e-08
0.337594	-4.39024e-11	-2.34295e-11	-7.03006e-12	1.09329e-11	8.31545e-11	2.53005e-10	5.63997e-10	1.07273e-09	1.81809e-09	-1.58931e-10	-2.62404e-10	-3.24126e-10	-4.46369e-11	9.70753e-10	2.75166e-09	5.19606e-09	8.12692e-09	1.15221e-08
0.337844	-4.54456e-11	-1.87996e-11	-1.01166e-11	1.71061e-11	9.70441e-11	2.48375e-10	5.6554e-10	1.07119e-09	1.81192e-09	-1.55853e-10	-2.63792e-10	-3.2714e-10	-2.94771e-11	9.72278e-10	2.75165e-09	5.17788e-09	8.12697e-09	1.15192e-08
0.338094	-4.39024e-11	-2.49728e-11	-1.62898e-11	1.86494e-11	7.85247e-11	2.46832e-10	5.7943e-10	1.07891e-09	1.80883e-09	-1.4978e-10	-2.47044e-10	-3.24044e-10	-4.00617e-11	9.75346e-10	2.74711e-09	5.18691e-09	8.13302e-09	1.15298e-08
0.338345	-3.92725e-11	-2.03429e-11	-1.01166e-11	1.71061e-11	9.39575e-11	2.51462e-10	5.748e-10	1.08199e-09	1.80729e-09	-1.57397e-10	-2.50048e-10	-3.13432e-10	-4.01254e-11	9.76853e-10	2.75316e-09	5.1855e-09	8.12551e-09	1.15253e-08
0.338595	-4.54456e-11	-1.72563e-11	-2.40021e-12	1.55628e-11	8.93277e-11	2.53005e-10	5.73257e-10	1.07428e-09	1.81963e-09	-1.61972e-10	-2.59144e-10	-3.27067e-10	-4.00981e-11	9.7078e-10	2.75017e-09	5.19466e-09	8.13918e-09	1.15267e-08
0.338845	-4.54456e-11	-2.34295e-11	-8.57335e-12	1.40195e-11	8.16113e-11	2.51462e-10	5.748e-10	1.07891e-09	1.82118e-09	-1.5441e-10	-2.47035e-10	-3.22528e-10	-3.55319e-11	9.73776e-10	2.75327e-09	5.19773e-09	8.13617e-09	1.15222e-08
0.339095	-4.08158e-11	-2.6516e-11	-1.32032e-11	2.01926e-11	8.77844e-11	2.51462e-10	5.68627e-10	1.07119e-09	1.81809e-09	-1.60429e-10	-2.53117e-10	-3.14921e-10	-3.70479e-11	9.70816e-10	2.76544e-09	5.19316e-09	8.13012e-09	1.15223e-08
0.339345	-5.00755e-11	-2.80593e-11	-1.16599e-11	1.71061e-11	8.16113e-11	2.54548e-10	5.71713e-10	1.07273e-09	1.81963e-09	-1.54428e-10	-2.62358e-10	-3.22446e-10	-4.00981e-11	9.82944e-10	2.75636e-09	5.19004e-09	8.14076e-09	1.15389e-08
0.339595	-4.08158e-11	-1.87996e-11	-1.32032e-11	1.71061e-11	8.31545e-11	2.51462e-10	5.63997e-10	1.08354e-09	1.81809e-09	-1.64977e-10	-2.71463e-10	-3.13378e-10	-3.85457e-11	9.73867e-10	2.75628e-09	5.18403e-09	8.14079e-09	1.15238e-08
0.339845	-4.69889e-11	-2.03429e-11	-1.16599e-11	1.55628e-11	8.46978e-11	2.51462e-10	5.71713e-10	1.07582e-09	1.82426e-09	-1.49826e-10	-2.54787e-10	-3.19405e-10	-3.0984e-11	9.73803e-10	2.7517e-09	5.20228e-09	8.13621e-09	1.15329e-08
0.340095	-3.77292e-11	-2.49728e-11	-1.47465e-11	1.24762e-11	8.93277e-11	2.51462e-10	5.68627e-10	1.07428e-09	1.82426e-09	-1.55863e-10	-2.6234e-10	-3.16382e-10	-4.31119e-11	9.72259e-10	2.75169e-09	5.19933e-09	8.13466e-09	1.15314e-08
0.340345	-4.54456e-11	-2.18862e-11	-1.32032e-11	2.01926e-11	9.55008e-11	2.51462e-10	5.67084e-10	1.08354e-09	1.82581e-09	-1.60401e-10	-2.66924e-10	-3.14848e-10	-3.86458e-11	9.692e-10	2.75476e-09	5.19777e-09	8.13463e-09	1.15329e-08
0.340595	-4.39024e-11	-2.80593e-11	-7.03006e-12	1.71061e-11	8.46978e-11	2.51462e-10	5.748e-10	1.07582e-09	1.81655e-09	-1.48273e-10	-2.60879e-10	-3.16346e-10	-4.47279e-11	9.69237e-10	2.7578e-09	5.19471e-09	8.13162e-09	1.15315e-08
0.340845	-5.00755e-11	-2.6516e-11	-1.62898e-11	1.86494e-11	7.69814e-11	2.48375e-10	5.6554e-10	1.07582e-09	1.81809e-09	-1.55817e-10	-2.65399e-10	-3.13186e-10	-4.62166e-11	9.78342e-10	2.7533e-09	5.19475e-09	8.13762e-09	1.15376e-08
0.341095	-4.39024e-11	-2.6516e-11	-1.32032e-11	1.86494e-11	8.93277e-11	2.54548e-10	5.76343e-10	1.08199e-09	1.82118e-09	-1.5431e-10	-2.62376e-10	-2.93588e-10	-3.4025e-11	9.70771e-10	2.76238e-09	5.20388e-09	8.12395e-09	1.15392e-08
0.341345	-4.54456e-11	-2.80593e-11	-1.32032e-11	1.55628e-11	9.0871e-11	2.49919e-10	5.71713e-10	1.08508e-09	1.81963e-09	-1.49771e-10	-2.6234e-10	-3.34556e-10	-3.39704e-11	9.70753e-10	2.75485e-09	5.20087e-09	8.12841e-09	1.15468e-08
0.341595	-5.00755e-11	-2.49728e-11	-8.57335e-12	9.38966e-12	8.62411e-11	2.54548e-10	5.68627e-10	1.08199e-09	1.81963e-09	-1.5736e-10	-2.5929e-10	-3.19487e-10	-3.70206e-11	9.75301e-10	2.76237e-09	5.19784e-09	8.1224e-09	1.15453e-08
0.341845	-4.23591e-11	-2.96026e-11	-1.01166e-11	1.71061e-11	9.24142e-11	2.46832e-10	5.71713e-10	1.07119e-09	1.81963e-09	-1.55863e-10	-2.59299e-10	-3.08848e-10	-3.70024e-11	9.70789e-10	2.75182e-09	5.20544e-09	8.1331e-09	1.15438e-08
0.342096	-4.69889e-11	-2.6516e-11	-8.57335e-12	1.24762e-11	9.39575e-11	2.56092e-10	5.63997e-10	1.07428e-09	1.82735e-09	-1.52821e-10	-2.63865e-10	-3.30044e-10	-3.09476e-11	9.76826e-10	2.76542e-09	5.20398e-09	8.1438e-09	1.15453e-08
0.342346	-4.54456e-11	-3.11459e-11	-2.40021e-12	1.55628e-11	8.46978e-11	2.56092e-10	5.67084e-10	1.07736e-09	1.82581e-09	-1.55808e-10	-2.62385e-10	-3.1493e-10	-3.85457e-11	9.70725e-10	2.75482e-09	5.20699e-09	8.13624e-09	1.15453e-08
0.342596	-5.00755e-11	-2.34295e-11	-8.57335e-12	1.86494e-11	9.24142e-11	2.54548e-10	5.63997e-10	1.07736e-09	1.82581e-09	-1.48201e-10	-2.65336e-10	-3.16391e-10	-4.00344e-11	9.64652e-10	2.75332e-09	5.20248e-09	8.13621e-09	1.15468e-08
0.342846	-3.46427e-11	-2.49728e-11	-2.09196e-11	2.01926e-11	8.46978e-11	2.48375e-10	5.68627e-10	1.07273e-09	1.81655e-09	-1.48155e-10	-2.50158e-10	-3.20921e-10	-2.64269e-11	9.75264e-10	2.76843e-09	5.21002e-09	8.13921e-09	1.15423e-08
0.343096	-4.54456e-11	-2.96026e-11	-8.57335e-12	1.86494e-11	9.0871e-11	2.56092e-10	5.71713e-10	1.07582e-09	1.82581e-09	-1.48255e-10	-2.5919e-10	-3.11852e-10	-4.46005e-11	9.70789e-10	2.74729e-09	5.19934e-09	8.13172e-09	1.1556e-08
0.343346	-4.08158e-11	-2.6516e-11	-1.47465e-11	1.24762e-11	8.31545e-11	2.51462e-10	5.62454e-10	1.08508e-09	1.82426e-09	-1.64977e-10	-2.54715e-10	-3.20948e-10	-3.71207e-11	9.76826e-10	2.76701e-09	5.1917e-09	8.1499e-09	1.15592e-08
0.343596	-3.92725e-11	-3.11459e-11	-5.48678e-12	1.55628e-11	8.62411e-11	2.48375e-10	5.63997e-10	1.07273e-09	1.82426e-09	-1.55944e-10	-2.62304e-10	-3.20948e-10	-4.31573e-11	9.70734e-10	2.77015e-09	5.19926e-09	8.13787e-09	1.15562e-08
0.343846	-4.08158e-11	-2.6516e-11	-7.03006e-12	1.40195e-11	8.46978e-11	2.49919e-10	5.748e-10	1.07428e-09	1.82118e-09	-1.58949e-10	-2.60797e-10	-3.11843e-10	-4.01254e-11	9.6615e-10	2.76555e-09	5.19629e-09	8.14838e-09	1.15653e-08
0.344096	-5.16188e-11	-2.6516e-11	-1.01166e-11	1.40195e-11	8.46978e-11	2.51462e-10	5.73257e-10	1.06502e-09	1.81963e-09	-1.60492e-10	-2.56267e-10	-3.19414e-10	-3.7057e-11	9.70743e-10	2.75784e-09	5.20237e-09	8.13326e-09	1.15684e-08
0.344346	-3.61859e-11	-2.34295e-11	-8.5693e-13	1.86494e-11	9.70441e-11	2.56092e-10	5.7017e-10	1.07428e-09	1.815e-09	-1.60529e-10	-2.65363e-10	-3.19478e-10	-3.70661e-11	9.7836e-10	2.74867e-09	5.20243e-09	8.14383e-09	1.15593e-08
0.344596	-5.16188e-11	-1.87996e-11	-1.01166e-11	1.55628e-11	8.16113e-11	2.60721e-10	5.73257e-10	1.07736e-09	1.81963e-09	-1.65086e-10	-2.6087e-10	-3.22492e-10	-4.16323e-11	9.72296e-10	2.75323e-09	5.2055e-09	8.1424e-09	1.15607e-08
0.344846	-3.61859e-11	-2.03429e-11	-1.16599e-11	6.30309e-12	8.0068e-11	2.57635e-10	5.6554e-10	1.07736e-09	1.82272e-09	-1.62045e-10	-2.65372e-10	-3.16382e-10	-4.01072e-11	9.70743e-10	2.75935e-09	5.20852e-09	8.14695e-09	1.15546e-08
0.345096	-4.08158e-11	-1.57131e-11	-8.57335e-12	2.17359e-11	9.0871e-11	2.54548e-10	5.68627e-10	1.06193e-09	1.81963e-09	-1.59013e-10	-2.57828e-10	-3.11816e-10	-3.54773e-11	9.72259e-10	2.7579e-09	5.20087e-09	8.14394e-09	1.15515e-08
0.345346	-5.47053e-11	-2.80593e-11	-1.16599e-11	1.40195e-11	8.0068e-11	2.57635e-10	5.77887e-10	1.08045e-09	1.81037e-09	-1.65095e-10	-2.66961e-10	-3.19423e-10	-2.78792e-11	9.72259e-10	2.76546e-09	5.19325e-09	8.14702e-09	1.15576e-08
0.345597	-4.39024e-11	-2.80593e-11	-1.16599e-11	1.71061e-11	7.85247e-11	2.59178e-10	5.7943e-10	1.07273e-09	1.82272e-09	-1.65131e-10	-2.71536e-10	-3.20994e-10	-3.69569e-11	9.70771e-10	2.75636e-09	5.20239e-09	8.15462e-09	1.15501e-08
0.345847	-3.77292e-11	-1.57131e-11	-1.01166e-11	2.01926e-11	8.77844e-11	2.59178e-10	5.748e-10	1.07891e-09	1.81037e-09	-1.65086e-10	-2.62413e-10	-3.20985e-10	-3.24817e-11	9.76835e-10	2.75629e-09	5.20858e-09	8.14699e-09	1.15622e-08
0.346097	-4.23591e-11	-2.96026e-11	-1.62898e-11	1.55628e-11	8.62411e-11	2.56092e-10	5.71713e-10	1.07119e-09	1.80729e-09	-1.57497e-10	-2.62385e-10	-3.17935e-10	-4.01072e-11	9.72278e-10	2.75324e-09	5.21463e-09	8.13939e-09	1.15531e-08
0.346347	-3.77292e-11	-2.80593e-11	-3.9435e-12	1.55628e-11	8.16113e-11	2.51462e-10	5.67084e-10	1.06656e-09	1.82426e-09	-1.63552e-10	-2.66952e-10	-3.17907e-10	-4.47097e-11	9.69264e-10	2.7532e-09	5.19943e-09	8.15001e-09	1.1553e-08
0.346597	-5.16188e-11	-2.03429e-11	-1.7833e-11	1.24762e-11	7.69814e-11	2.46832e-10	5.80973e-10	1.06502e-09	1.82889e-09	-1.63452e-10	-2.65472e-10	-3.16382e-10	-4.16687e-11	9.79894e-10	2.75019e-09	5.20243e-09	8.14863e-09	1.155e-08
0.346847	-4.69889e-11	-2.49728e-11	-1.16599e-11	9.38966e-12	8.77844e-11	2.46832e-10	5.73257e-10	1.07428e-09	1.81655e-09	-1.40748e-10	-2.68522e-10	-3.16382e-10	-3.86003e-11	9.75373e-10	2.75778e-09	5.20851e-09	8.16231e-09	1.15622e-08
0.347097	-5.31621e-11	-2.18862e-11	-7.03006e-12	1.40195e-11	8.93277e-11	2.49919e-10	5.77887e-10	1.06965e-09	1.81809e-09	-1.69561e-10	-2.70011e-10	-3.17898e-10	-3.85821e-11	9.73821e-10	2.75482e-09	5.20248e-09	8.15627e-09	1.15653e-08
0.347347	-4.39024e-11	-2.6516e-11	-1.62898e-11	1.09329e-11	8.31545e-11	2.46832e-10	5.7943e-10	1.07273e-09	1.81037e-09	-1.65095e-10	-2.60897e-10	-3.1641e-10	-3.85912e-11	9.73766e-10	2.76235e-09	5.20852e-09	8.1532e-09	1.15624e-08
0.347597	-4.54456e-11	-2.6516e-11	-2.40021e-12	1.40195e-11	8.77844e-11	2.46832e-10	5.7017e-10	1.07582e-09	1.81963e-09	-1.54428e-10	-2.6539e-10	-3.20967e-10	-4.0089e-11	9.6615e-10	2.74872e-09	5.20398e-09	8.15626e-09	1.15714e-08
0.347847	-4.08158e-11	-2.80593e-11	-1.01166e-11	1.24762e-11	9.39575e-11	2.53005e-10	5.76343e-10	1.07582e-09	1.82118e-09	-1.60465e-10	-2.6086e-10	-3.19478e-10	-3.54227e-11	9.67666e-10	2.7563e-09	5.20396e-09	8.16091e-09	1.15654e-08
0.348097	-5.16188e-11	-2.6516e-11	-1.32032e-11	1.71061e-11	8.93277e-11	2.54548e-10	5.7943e-10	1.06965e-09	1.83198e-09	-1.60511e-10	-2.63883e-10	-3.20967e-10	-1.88834e-11	9.73794e-10	2.7624e-09	5.20552e-09	8.17002e-09	1.15639e-08
0.348347	-4.39024e-11	-2.80593e-11	-8.57335e-12	2.01926e-11	8.62411e-11	2.56092e-10	5.748e-10	1.07582e-09	1.82735e-09	-1.62045e-10	-2.63901e-10	-3.16455e-10	-6.28197e-11	9.76807e-10	2.7548e-09	5.21163e-09	8.1579e-09	1.15715e-08
0.348597	-5.00755e-11	-3.11459e-11	-1.47465e-11	1.24762e-11	8.16113e-11	2.65351e-10	5.7017e-10	1.07582e-09	1.83352e-09	-1.6357e-10	-2.6392e-10	-3.25533e-10	-3.11204e-11	9.64698e-10	2.75325e-09	5.21169e-09	8.1624e-09	1.15746e-08
0.348847	-4.69889e-11	-2.34295e-11	-1.16599e-11	2.17359e-11	8.62411e-11	2.49919e-10	5.7017e-10	1.07119e-09	1.81809e-09	-1.62054e-10	-2.66943e-10	-3.17971e-10	-4.15322e-11	9.76753e-10	2.75778e-09	5.21475e-09	8.16238e-09	1.15792e-08
0.349098	-5.31621e-11	-2.49728e-11	-1.01166e-11	9.38966e-12	8.77844e-11	2.43745e-10	5.748e-10	1.07428e-09	1.82118e-09	-1.62081e-10	-2.62385e-10	-3.19423e-10	-2.94589e-11	9.6468e-10	2.75178e-09	5.2178e-09	8.15477e-09	1.15823e-08
0.349348	-5.16188e-11	-2.34295e-11	-1.01166e-11	1.86494e-11	9.0871e-11	2.54548e-10	5.63997e-10	1.08045e-09	1.82735e-09	-1.68145e-10	-2.62358e-10	-3.14903e-10	-4.00526e-11	9.73739e-10	2.7639e-09	5.21324e-09	8.15785e-09	1.15717e-08
0.349598	-4.39024e-11	-2.80593e-11	-1.16599e-11	1.40195e-11	8.31545e-11	2.42202e-10	5.7017e-10	1.09434e-09	1.82581e-09	-1.6209e-10	-2.62376e-10	-3.22483e-10	-3.86094e-11	9.70734e-10	2.75634e-09	5.21326e-09	8.17002e-09	1.15837e-08
0.349848	-4.54456e-11	-2.49728e-11	-5.48678e-12	1.55628e-11	8.93277e-11	2.53005e-10	5.76343e-10	1.07582e-09	1.82581e-09	-1.63624e-10	-2.65427e-10	-3.19432e-10	-4.16323e-11	9.69191e-10	2.75482e-09	5.22076e-09	8.16089e-09	1.15732e-08
0.350098	-5.00755e-11	-2.80593e-11	-1.16599e-11	6.30309e-12	8.46978e-11	2.53005e-10	5.71713e-10	1.08508e-09	1.81809e-09	-1.71241e-10	-2.65399e-10	-3.11843e-10	-3.86185e-11	9.69191e-10	2.7624e-09	5.20109e-09	8.15328e-09	1.15808e-08
0.350348	-4.39024e-11	-2.03429e-11	-8.57335e-12	1.71061e-11	8.77844e-11	2.51462e-10	5.67084e-10	1.07891e-09	1.83198e-09	-1.68227e-10	-2.5781e-10	-3.20976e-10	-4.1605e-11	9.70734e-10	2.7579e-09	5.21923e-09	8.16386e-09	1.15854e-08
0.350598	-3.92725e-11	-2.80593e-11	-1.01166e-11	1.55628e-11	8.62411e-11	2.49919e-10	5.7943e-10	1.07428e-09	1.83198e-09	-1.66684e-10	-2.63829e-10	-3.25569e-10	-3.40068e-11	9.73785e-10	2.76248e-09	5.21179e-09	8.15634e-09	1.15869e-08
0.350848	-4.69889e-11	-2.49728e-11	-1.16599e-11	2.01926e-11	8.93277e-11	2.49919e-10	5.71713e-10	1.08354e-09	1.82889e-09	-1.66666e-10	-2.57774e-10	-3.19496e-10	-3.55501e-11	9.72259e-10	2.76706e-09	5.22393e-09	8.16237e-09	1.15839e-08
0.351098	-5.16188e-11	-3.42325e-11	-7.03006e-12	2.48225e-11	9.85874e-11	2.48375e-10	5.68627e-10	1.08817e-09	1.83044e-09	-1.6514e-10	-2.59244e-10	-3.19451e-10	-4.6162e-11	9.69209e-10	2.76408e-09	5.22243e-09	8.15939e-09	1.15793e-08
0.351348	-4.69889e-11	-2.6516e-11	-1.62898e-11	9.38966e-12	8.16113e-11	2.54548e-10	5.76343e-10	1.08045e-09	1.83352e-09	-1.6514e-10	-2.56221e-10	-3.17962e-10	-3.40705e-11	9.70725e-10	2.77008e-09	5.21485e-09	8.16388e-09	1.15854e-08
0.351598	-5.16188e-11	-2.18862e-11	-1.01166e-11	1.71061e-11	8.0068e-11	2.49919e-10	5.76343e-10	1.08354e-09	1.83507e-09	-1.66693e-10	-2.59217e-10	-3.24008e-10	-4.16141e-11	9.72241e-10	2.75643e-09	5.22395e-09	8.1533e-09	1.15915e-08
0.351848	-4.54456e-11	-2.18862e-11	-1.16599e-11	1.40195e-11	8.31545e-11	2.53005e-10	5.71713e-10	1.07891e-09	1.83507e-09	-1.71259e-10	-2.53144e-10	-3.16437e-10	-4.00799e-11	9.69228e-10	2.76397e-09	5.22236e-09	8.16543e-09	1.15855e-08
0.352098	-4.69889e-11	-3.11459e-11	-7.03006e-12	1.55628e-11	8.93277e-11	2.59178e-10	5.748e-10	1.09279e-09	1.84124e-09	-1.682e-10	-2.54651e-10	-3.19432e-10	-3.09658e-11	9.73721e-10	2.76253e-09	5.20262e-09	8.16399e-09	1.15885e-08
0.352348	-4.54456e-11	-2.34295e-11	-8.57335e-12	1.55628e-11	8.77844e-11	2.56092e-10	5.57824e-10	1.08354e-09	1.82889e-09	-1.62127e-10	-2.57737e-10	-3.17971e-10	-3.85366e-11	9.63118e-10	2.77013e-09	5.21773e-09	8.16555e-09	1.159e-08
0.352598	-4.54456e-11	-2.80593e-11	-8.57335e-12	2.17359e-11	8.77844e-11	2.48375e-10	5.71713e-10	1.06965e-09	1.82426e-09	-1.69725e-10	-2.62331e-10	-3.25487e-10	-3.85912e-11	9.70662e-10	2.76713e-09	5.21476e-09	8.17318e-09	1.1587e-08
0.352849	-3.77292e-11	-3.26892e-11	-1.47465e-11	1.24762e-11	8.46978e-11	2.42202e-10	5.76343e-10	1.06965e-09	1.83661e-09	-1.7125e-10	-2.62349e-10	-3.08866e-10	-4.0089e-11	9.67721e-10	2.76861e-09	5.21328e-09	8.17172e-09	1.1593e-08
0.353099	-4.08158e-11	-2.49728e-11	-8.57335e-12	1.86494e-11	7.54381e-11	2.54548e-10	5.77887e-10	1.08199e-09	1.83507e-09	-1.63634e-10	-2.60788e-10	-3.27021e-10	-3.55501e-11	9.78324e-10	2.76408e-09	5.22391e-09	8.17625e-09	1.15825e-08
0.353349	-4.08158e-11	-2.34295e-11	-3.9435e-12	2.32792e-11	8.62411e-11	2.49919e-10	5.67084e-10	1.07736e-09	1.82889e-09	-1.63597e-10	-2.54733e-10	-3.19551e-10	-4.00981e-11	9.69246e-10	2.76861e-09	5.21786e-09	8.17018e-09	1.15976e-08
0.353599	-4.08158e-11	-2.34295e-11	-3.9435e-12	1.71061e-11	8.31545e-11	2.49919e-10	5.7943e-10	1.08354e-09	1.83661e-09	-1.65177e-10	-2.63847e-10	-3.27067e-10	-4.00708e-11	9.70762e-10	2.76713e-09	5.21477e-09	8.17013e-09	1.1584e-08
0.353849	-4.23591e-11	-3.11459e-11	-1.7833e-11	1.71061e-11	8.77844e-11	2.51462e-10	5.71713e-10	1.08354e-09	1.84278e-09	-1.74255e-10	-2.63883e-10	-3.16464e-10	-3.09567e-11	9.78378e-10	2.76853e-09	5.21475e-09	8.16711e-09	1.1587e-08
0.354099	-5.00755e-11	-2.49728e-11	-7.03006e-12	1.40195e-11	9.39575e-11	2.57635e-10	5.67084e-10	1.07428e-09	1.83507e-09	-1.60665e-10	-2.60788e-10	-3.20894e-10	-3.70388e-11	9.75337e-10	2.7503e-09	5.21477e-09	8.17321e-09	1.15962e-08
0.354349	-4.69889e-11	-2.6516e-11	-1.7833e-11	2.01926e-11	8.93277e-11	2.54548e-10	5.76343e-10	1.07273e-09	1.84124e-09	-1.74282e-10	-2.53199e-10	-3.07368e-10	-4.313e-11	9.69164e-10	2.75936e-09	5.21787e-09	8.17625e-09	1.16023e-08
0.354599	-4.54456e-11	-1.87996e-11	-1.32032e-11	1.40195e-11	9.0871e-11	2.54548e-10	5.63997e-10	1.0681e-09	1.83352e-09	-1.69734e-10	-2.62322e-10	-3.3619e-10	-3.55592e-11	9.60031e-10	2.76401e-09	5.22549e-09	8.16865e-09	1.15978e-08
0.354849	-4.54456e-11	-2.96026e-11	-1.01166e-11	1.86494e-11	8.77844e-11	2.63808e-10	5.6554e-10	1.07428e-09	1.83507e-09	-1.60565e-10	-2.65363e-10	-3.24135e-10	-3.86185e-11	9.69118e-10	2.76707e-09	5.22245e-09	8.17013e-09	1.16008e-08
0.355099	-5.00755e-11	-2.49728e-11	-1.32032e-11	2.01926e-11	8.0068e-11	2.54548e-10	5.62454e-10	1.08662e-09	1.84433e-09	-1.62081e-10	-2.54778e-10	-3.19496e-10	-4.77053e-11	9.67648e-10	2.76403e-09	5.21635e-09	8.17016e-09	1.15933e-08
0.355349	-5.16188e-11	-2.96026e-11	-1.16599e-11	1.86494e-11	8.93277e-11	2.57635e-10	5.68627e-10	1.07891e-09	1.8505e-09	-1.69661e-10	-2.66924e-10	-3.20957e-10	-3.40705e-11	9.67675e-10	2.7625e-09	5.2194e-09	8.17322e-09	1.16054e-08
0.355599	-3.46427e-11	-2.34295e-11	-1.7833e-11	1.40195e-11	8.0068e-11	2.49919e-10	5.73257e-10	1.08354e-09	1.84124e-09	-1.60565e-10	-2.68513e-10	-3.14884e-10	-4.0089e-11	9.73776e-10	2.764e-09	5.2255e-09	8.17475e-09	1.16055e-08
0.355849	-5.62486e-11	-2.18862e-11	-1.93763e-11	1.09329e-11	9.24142e-11	2.54548e-10	5.6554e-10	1.07582e-09	1.82889e-09	-1.62027e-10	-2.66906e-10	-3.1798e-10	-4.01436e-11	9.73812e-10	2.76251e-09	5.22248e-09	8.17169e-09	1.16039e-08
0.356099	-4.23591e-11	-2.6516e-11	-2.40021e-12	1.71061e-11	8.46978e-11	2.51462e-10	5.71713e-10	1.07273e-09	1.84433e-09	-1.60556e-10	-2.51701e-10	-3.31651e-10	-4.31846e-11	9.73821e-10	2.76701e-09	5.221e-09	8.1686e-09	1.16024e-08
0.35635	-4.23591e-11	-2.18862e-11	-1.16599e-11	1.24762e-11	8.31545e-11	2.57635e-10	5.68627e-10	1.07428e-09	1.83507e-09	-1.68118e-10	-2.60733e-10	-3.19514e-10	-4.16869e-11	9.7531e-10	2.75491e-09	5.23164e-09	8.16553e-09	1.16069e-08
0.3566	-4.69889e-11	-2.34295e-11	-3.9435e-12	1.09329e-11	8.16113e-11	2.43745e-10	5.63997e-10	1.09434e-09	1.83661e-09	-1.59013e-10	-2.56221e-10	-3.16464e-10	-4.31664e-11	9.69255e-10	2.76704e-09	5.22711e-09	8.16559e-09	1.15964e-08
0.35685	-4.69889e-11	-2.80593e-11	-1.01166e-11	2.01926e-11	8.46978e-11	2.57635e-10	5.748e-10	1.07736e-09	1.84433e-09	-1.59004e-10	-2.57728e-10	-3.28574e-10	-3.70115e-11	9.75291e-10	2.76868e-09	5.22406e-09	8.17781e-09	1.16085e-08
0.3571	-4.08158e-11	-2.49728e-11	-5.48678e-12	1.55628e-11	8.62411e-11	2.45289e-10	5.62454e-10	1.07428e-09	1.83198e-09	-1.66556e-10	-2.59299e-10	-3.16482e-10	-2.63723e-11	9.70798e-10	2.77472e-09	5.22861e-09	8.18082e-09	1.1607e-08
0.35735	-4.39024e-11	-2.49728e-11	-7.03006e-12	1.86494e-11	7.85247e-11	2.56092e-10	5.7017e-10	1.08045e-09	1.84278e-09	-1.54465e-10	-2.65354e-10	-3.22455e-10	-3.8482e-11	9.78378e-10	2.76411e-09	5.22712e-09	8.16262e-09	1.1607e-08
0.3576	-4.08158e-11	-2.49728e-11	-8.5693e-13	1.55628e-11	8.62411e-11	2.51462e-10	5.6554e-10	1.08354e-09	1.84124e-09	-1.65068e-10	-2.56176e-10	-3.13423e-10	-3.4025e-11	9.75382e-10	2.76868e-09	5.22861e-09	8.17627e-09	1.1604e-08
0.35785	-4.69889e-11	-2.49728e-11	-1.47465e-11	1.86494e-11	7.69814e-11	2.54548e-10	5.7017e-10	1.07582e-09	1.82735e-09	-1.65095e-10	-2.45473e-10	-3.27058e-10	-4.16505e-11	9.76889e-10	2.77773e-09	5.22407e-09	8.18243e-09	1.1607e-08
0.3581	-4.69889e-11	-2.03429e-11	-8.57335e-12	1.09329e-11	8.31545e-11	2.54548e-10	5.7017e-10	1.07891e-09	1.83198e-09	-1.59004e-10	-2.5003e-10	-3.21039e-10	-4.6253e-11	9.76953e-10	2.75647e-09	5.2286e-09	8.17791e-09	1.15994e-08
0.35835	-4.08158e-11	-1.10832e-11	-1.32032e-11	2.32792e-11	8.46978e-11	2.60721e-10	5.7017e-10	1.09279e-09	1.83661e-09	-1.60474e-10	-2.57646e-10	-3.20994e-10	-4.32301e-11	9.86067e-10	2.76248e-09	5.22562e-09	8.18243e-09	1.16131e-08
0.3586	-4.85322e-11	-2.6516e-11	-1.32032e-11	2.01926e-11	8.93277e-11	2.56092e-10	5.68627e-10	1.08662e-09	1.8397e-09	-1.57451e-10	-2.5161e-10	-3.19441e-10	-4.32119e-11	9.79994e-10	2.76859e-09	5.23318e-09	8.17639e-09	1.16132e-08
0.35885	-4.08158e-11	-2.34295e-11	-1.01166e-11	1.40195e-11	9.24142e-11	2.49919e-10	5.7017e-10	1.08662e-09	1.83507e-09	-1.60511e-10	-2.5466e-10	-3.14903e-10	-4.31573e-11	9.75392e-10	2.76411e-09	5.22565e-09	8.18241e-09	1.16041e-08
0.3591	-5.00755e-11	-3.26892e-11	-8.57335e-12	1.40195e-11	8.31545e-11	2.66895e-10	5.7017e-10	1.09125e-09	1.83661e-09	-1.65086e-10	-2.60715e-10	-3.2251e-10	-3.40523e-11	9.76908e-10	2.77476e-09	5.2332e-09	8.17478e-09	1.16147e-08
0.35935	-4.39024e-11	-2.18862e-11	-7.03006e-12	2.17359e-11	8.46978e-11	2.56092e-10	5.7017e-10	1.07736e-09	1.84433e-09	-1.62063e-10	-2.50067e-10	-3.24071e-10	-4.15959e-11	9.79921e-10	2.77485e-09	5.22867e-09	8.16872e-09	1.16117e-08
0.3596	-3.46427e-11	-2.80593e-11	-8.57335e-12	1.40195e-11	8.62411e-11	2.46832e-10	5.73257e-10	1.08662e-09	1.8397e-09	-1.62027e-10	-2.48487e-10	-3.22574e-10	-3.70752e-11	9.7236e-10	2.77937e-09	5.22869e-09	8.18244e-09	1.16193e-08
0.359851	-4.23591e-11	-2.6516e-11	-7.03006e-12	1.40195e-11	8.62411e-11	2.54548e-10	5.68627e-10	1.09279e-09	1.84124e-09	-1.58904e-10	-2.50021e-10	-3.25587e-10	-3.85366e-11	9.79903e-10	2.77021e-09	5.23629e-09	8.18707e-09	1.16147e-08
0.360101	-4.08158e-11	-2.18862e-11	-8.57335e-12	2.17359e-11	8.77844e-11	2.51462e-10	5.748e-10	1.09588e-09	1.84124e-09	-1.46839e-10	-2.5318e-10	-3.2103e-10	-3.24453e-11	9.73876e-10	2.76409e-09	5.23182e-09	8.18412e-09	1.16056e-08
0.360351	-3.92725e-11	-2.96026e-11	-1.01166e-11	1.24762e-11	8.62411e-11	2.51462e-10	5.6554e-10	1.08354e-09	1.83198e-09	-1.72611e-10	-2.69893e-10	-3.21021e-10	-3.24544e-11	9.78387e-10	2.77018e-09	5.24242e-09	8.1963e-09	1.16132e-08
0.360601	-4.54456e-11	-1.26265e-11	-1.01166e-11	1.40195e-11	8.31545e-11	2.48375e-10	5.7017e-10	1.09279e-09	1.84278e-09	-1.59076e-10	-2.56276e-10	-3.24026e-10	-4.00799e-11	9.73903e-10	2.7732e-09	5.23334e-09	8.19474e-09	1.16132e-08
0.360851	-4.08158e-11	-2.03429e-11	-1.01166e-11	1.24762e-11	9.55008e-11	2.57635e-10	5.77887e-10	1.08199e-09	1.82735e-09	-1.65077e-10	-2.5771e-10	-3.16473e-10	-4.00526e-11	9.84515e-10	2.76261e-09	5.23481e-09	8.178e-09	1.16193e-08
0.361101	-3.92725e-11	-2.96026e-11	-1.47465e-11	2.17359e-11	9.0871e-11	2.48375e-10	5.71713e-10	1.08199e-09	1.83507e-09	-1.62036e-10	-2.56194e-10	-3.25542e-10	-2.77882e-11	9.78578e-10	2.77319e-09	5.2348e-09	8.18552e-09	1.16102e-08
0.361351	-4.54456e-11	-2.96026e-11	-1.47465e-11	1.86494e-11	8.31545e-11	2.62265e-10	5.82516e-10	1.07891e-09	1.83661e-09	-1.5747e-10	-2.56203e-10	-3.19532e-10	-1.72491e-11	9.95209e-10	2.7687e-09	5.23182e-09	8.18408e-09	1.16178e-08
0.361601	-3.46427e-11	-2.18862e-11	-1.01166e-11	2.32792e-11	8.77844e-11	2.53005e-10	5.76343e-10	1.09434e-09	1.84124e-09	-1.61999e-10	-2.59208e-10	-3.25587e-10	-5.21714e-11	9.76953e-10	2.77171e-09	5.24397e-09	8.19021e-09	1.16194e-08
0.361851	-4.08158e-11	-3.42325e-11	-1.62898e-11	1.71061e-11	8.16113e-11	2.51462e-10	5.748e-10	1.09125e-09	1.83198e-09	-1.58895e-10	-2.51683e-10	-3.24117e-10	-3.71935e-11	9.67666e-10	2.77024e-09	5.23798e-09	8.19782e-09	1.16256e-08
0.362101	-4.39024e-11	-2.80593e-11	-3.9435e-12	1.71061e-11	8.16113e-11	2.53005e-10	5.71713e-10	1.08045e-09	1.82735e-09	-1.4526e-10	-2.65354e-10	-3.27112e-10	-4.77144e-11	9.63118e-10	2.77634e-09	5.24402e-09	8.18876e-09	1.16378e-08
0.362351	-3.61859e-11	-1.87996e-11	-7.03006e-12	2.79091e-11	8.31545e-11	2.54548e-10	5.68627e-10	1.09125e-09	1.84278e-09	-1.63506e-10	-2.63974e-10	-3.19542e-10	-3.71389e-11	9.7678e-10	2.77786e-09	5.24101e-09	8.19636e-09	1.16303e-08
0.362601	-3.61859e-11	-2.03429e-11	-1.01166e-11	1.40195e-11	8.77844e-11	2.53005e-10	5.7017e-10	1.09125e-09	1.8397e-09	-1.68172e-10	-2.74495e-10	-3.25551e-10	-4.31482e-11	9.70825e-10	2.77176e-09	5.24091e-09	8.20096e-09	1.16363e-08
0.362851	-5.47053e-11	-2.03429e-11	-8.57335e-12	1.55628e-11	8.16113e-11	2.53005e-10	5.7017e-10	1.09125e-09	1.84433e-09	-1.65122e-10	-2.50248e-10	-3.1798e-10	-3.85821e-11	9.81419e-10	2.77023e-09	5.22727e-09	8.19794e-09	1.16302e-08
0.363101	-3.92725e-11	-1.72563e-11	-7.03006e-12	7.84638e-12	8.77844e-11	2.48375e-10	5.7017e-10	1.08662e-09	1.84587e-09	-1.60556e-10	-2.65354e-10	-3.20957e-10	-3.39977e-11	9.73903e-10	2.77473e-09	5.24091e-09	8.19801e-09	1.16271e-08
0.363351	-4.08158e-11	-2.96026e-11	-1.16599e-11	1.86494e-11	8.0068e-11	2.56092e-10	5.71713e-10	1.09897e-09	1.84433e-09	-1.65031e-10	-2.65427e-10	-3.16419e-10	-3.70024e-11	9.81437e-10	2.76413e-09	5.24097e-09	8.21325e-09	1.16195e-08
0.363602	-4.69889e-11	-2.80593e-11	-1.01166e-11	2.63658e-11	8.93277e-11	2.63808e-10	5.6554e-10	1.10205e-09	1.84741e-09	-1.52931e-10	-2.62358e-10	-3.19478e-10	-3.39704e-11	9.73912e-10	2.77166e-09	5.23797e-09	8.2118e-09	1.16301e-08
0.363852	-4.54456e-11	-2.18862e-11	-1.62898e-11	2.63658e-11	8.62411e-11	2.56092e-10	5.68627e-10	1.09588e-09	1.83507e-09	-1.64968e-10	-2.59299e-10	-3.25596e-10	-3.39977e-11	9.82908e-10	2.76566e-09	5.24558e-09	8.20873e-09	1.16272e-08
0.364102	-5.31621e-11	-3.11459e-11	-7.03006e-12	2.32792e-11	8.0068e-11	2.54548e-10	5.67084e-10	1.09279e-09	1.84587e-09	-1.49862e-10	-2.60815e-10	-3.2566e-10	-4.16141e-11	9.64743e-10	2.77476e-09	5.24561e-09	8.20716e-09	1.16348e-08
0.364352	-3.92725e-11	-1.72563e-11	-1.32032e-11	2.63658e-11	9.0871e-11	2.53005e-10	5.73257e-10	1.09125e-09	1.85976e-09	-1.61954e-10	-2.62376e-10	-3.3019e-10	-4.01618e-11	9.78342e-10	2.77327e-09	5.24406e-09	8.20262e-09	1.16363e-08
0.364602	-5.47053e-11	-2.03429e-11	-1.16599e-11	7.84638e-12	8.16113e-11	2.49919e-10	5.62454e-10	1.09434e-09	1.8505e-09	-1.58958e-10	-2.66952e-10	-3.22583e-10	-4.46551e-11	9.75428e-10	2.77021e-09	5.23947e-09	8.21019e-09	1.16226e-08
0.364852	-4.69889e-11	-2.18862e-11	-2.40021e-12	1.09329e-11	7.69814e-11	2.51462e-10	5.6554e-10	1.09279e-09	1.84124e-09	-1.55908e-10	-2.65417e-10	-3.20967e-10	-3.24817e-11	9.84542e-10	2.77023e-09	5.23945e-09	8.20415e-09	1.16332e-08
0.365102	-4.23591e-11	-1.87996e-11	-1.01166e-11	1.09329e-11	8.77844e-11	2.56092e-10	5.62454e-10	1.08662e-09	1.83815e-09	-1.58958e-10	-2.59317e-10	-3.13432e-10	-3.2409e-11	9.81528e-10	2.7763e-09	5.23949e-09	8.20718e-09	1.16257e-08
0.365352	-4.54456e-11	-2.34295e-11	-1.01166e-11	1.09329e-11	8.77844e-11	2.46832e-10	5.8406e-10	1.08817e-09	1.84896e-09	-1.61999e-10	-2.60815e-10	-3.30153e-10	-3.24453e-11	9.78451e-10	2.77179e-09	5.24705e-09	8.21031e-09	1.16393e-08
0.365602	-4.39024e-11	-2.49728e-11	-1.01166e-11	2.01926e-11	8.77844e-11	2.56092e-10	5.57824e-10	1.08354e-09	1.84278e-09	-1.5746e-10	-2.62331e-10	-3.28692e-10	-3.85548e-11	9.76926e-10	2.77634e-09	5.23648e-09	8.22095e-09	1.16303e-08
0.365852	-4.85322e-11	-3.11459e-11	-1.32032e-11	1.71061e-11	8.31545e-11	2.57635e-10	5.77887e-10	1.08354e-09	1.8505e-09	-1.6052e-10	-2.5929e-10	-3.22564e-10	-4.00981e-11	9.79967e-10	2.77636e-09	5.24555e-09	8.21185e-09	1.16333e-08
0.366102	-3.77292e-11	-2.03429e-11	-1.62898e-11	1.71061e-11	8.62411e-11	2.46832e-10	5.63997e-10	1.07582e-09	1.85204e-09	-1.66602e-10	-2.59263e-10	-3.19532e-10	-3.70388e-11	9.79949e-10	2.77482e-09	5.24252e-09	8.20877e-09	1.16363e-08
0.366352	-5.31621e-11	-2.6516e-11	-1.16599e-11	2.17359e-11	8.93277e-11	2.63808e-10	5.71713e-10	1.08971e-09	1.82889e-09	-1.60511e-10	-2.57756e-10	-3.28583e-10	-3.40159e-11	9.73848e-10	2.77325e-09	5.23643e-09	8.21345e-09	1.16317e-08
0.366602	-4.54456e-11	-2.18862e-11	-8.5693e-13	1.24762e-11	8.46978e-11	2.63808e-10	5.68627e-10	1.09588e-09	1.84433e-09	-1.55926e-10	-2.60806e-10	-3.14921e-10	-4.16323e-11	9.73857e-10	2.76726e-09	5.24246e-09	8.23472e-09	1.16303e-08
0.366852	-4.69889e-11	-2.96026e-11	-1.16599e-11	2.32792e-11	8.16113e-11	2.51462e-10	5.68627e-10	1.10051e-09	1.84124e-09	-1.60447e-10	-2.62385e-10	-3.164e-10	-4.31119e-11	9.81455e-10	2.78697e-09	5.23643e-09	8.21655e-09	1.16424e-08
0.367103	-4.69889e-11	-2.6516e-11	-3.9435e-12	1.71061e-11	8.62411e-11	2.53005e-10	5.71713e-10	1.07891e-09	1.8505e-09	-1.55872e-10	-2.68468e-10	-3.22501e-10	-2.79611e-11	9.76989e-10	2.77336e-09	5.24255e-09	8.21647e-09	1.16349e-08
0.367353	-4.23591e-11	-1.57131e-11	-1.62898e-11	1.55628e-11	7.85247e-11	2.51462e-10	5.80973e-10	1.08662e-09	1.82889e-09	-1.51315e-10	-2.63865e-10	-3.20967e-10	-4.30937e-11	9.87647e-10	2.77327e-09	5.25177e-09	8.221e-09	1.16441e-08
0.367603	-3.92725e-11	-1.87996e-11	-7.03006e-12	2.17359e-11	8.31545e-11	2.62265e-10	5.82516e-10	1.09279e-09	1.84278e-09	-1.5894e-10	-2.53226e-10	-3.13478e-10	-3.86276e-11	9.89172e-10	2.77182e-09	5.25631e-09	8.21342e-09	1.16502e-08
0.367853	-5.00755e-11	-2.6516e-11	-1.01166e-11	2.01926e-11	8.93277e-11	2.54548e-10	5.77887e-10	1.09279e-09	1.84896e-09	-1.63533e-10	-2.63811e-10	-3.37733e-10	-4.15868e-11	9.78505e-10	2.78397e-09	5.24263e-09	8.21641e-09	1.16518e-08
0.368103	-5.47053e-11	-2.49728e-11	-2.40021e-12	1.40195e-11	8.46978e-11	2.57635e-10	5.76343e-10	1.09742e-09	1.8505e-09	-1.58931e-10	-2.59308e-10	-3.21139e-10	-3.0984e-11	9.78414e-10	2.77649e-09	5.24558e-09	8.21332e-09	1.16548e-08
0.368353	-5.31621e-11	-2.96026e-11	-1.01166e-11	1.55628e-11	8.31545e-11	2.62265e-10	5.82516e-10	1.09434e-09	1.83661e-09	-1.49789e-10	-2.60851e-10	-3.27149e-10	-4.00617e-11	9.73867e-10	2.78853e-09	5.24255e-09	8.20424e-09	1.16457e-08
0.368603	-4.69889e-11	-3.11459e-11	-1.93763e-11	1.09329e-11	9.24142e-11	2.56092e-10	5.7017e-10	1.09434e-09	1.84896e-09	-1.55835e-10	-2.68486e-10	-3.28656e-10	-3.85639e-11	9.78424e-10	2.77035e-09	5.24256e-09	8.21945e-09	1.16533e-08
0.368853	-5.31621e-11	-2.34295e-11	-1.47465e-11	7.84638e-12	8.31545e-11	2.59178e-10	5.71713e-10	1.09742e-09	1.85204e-09	-1.55926e-10	-2.68486e-10	-3.19505e-10	-3.40159e-11	9.79967e-10	2.77785e-09	5.24716e-09	8.22102e-09	1.16472e-08
0.369103	-3.92725e-11	-2.6516e-11	-5.48678e-12	2.32792e-11	8.16113e-11	2.57635e-10	5.7943e-10	1.09279e-09	1.84433e-09	-1.65049e-10	-2.60906e-10	-3.17926e-10	-4.00981e-11	9.78487e-10	2.77491e-09	5.25025e-09	8.21344e-09	1.16488e-08
0.369353	-4.54456e-11	-2.49728e-11	-1.47465e-11	1.40195e-11	8.62411e-11	2.54548e-10	5.748e-10	1.09279e-09	1.84278e-09	-1.60556e-10	-2.68468e-10	-3.17907e-10	-4.16596e-11	9.84533e-10	2.78544e-09	5.2533e-09	8.21946e-09	1.16625e-08
0.369603	-4.85322e-11	-2.80593e-11	-8.5693e-13	2.48225e-11	8.62411e-11	2.63808e-10	5.76343e-10	1.08354e-09	1.85513e-09	-1.65049e-10	-2.65408e-10	-3.16419e-10	-4.16869e-11	9.7698e-10	2.76427e-09	5.25025e-09	8.21339e-09	1.16595e-08
0.369853	-4.54456e-11	-2.03429e-11	-1.62898e-11	1.71061e-11	8.46978e-11	2.49919e-10	5.7017e-10	1.08662e-09	1.84278e-09	-1.55981e-10	-2.56194e-10	-3.22492e-10	-4.4646e-11	9.82999e-10	2.7839e-09	5.24716e-09	8.21336e-09	1.16548e-08
0.370103	-3.77292e-11	-1.72563e-11	-1.47465e-11	2.01926e-11	8.46978e-11	2.53005e-10	5.80973e-10	1.08817e-09	1.84741e-09	-1.64986e-10	-2.48605e-10	-3.19432e-10	-2.94862e-11	9.76989e-10	2.7734e-09	5.2441e-09	8.21486e-09	1.16427e-08
0.370353	-4.69889e-11	-2.18862e-11	-1.16599e-11	1.71061e-11	8.77844e-11	2.57635e-10	5.748e-10	1.08971e-09	1.83815e-09	-1.49826e-10	-2.6382e-10	-3.11834e-10	-4.1605e-11	9.86049e-10	2.78245e-09	5.24561e-09	8.21039e-09	1.16594e-08
0.370604	-3.61859e-11	-1.57131e-11	-1.01166e-11	1.55628e-11	9.0871e-11	2.49919e-10	5.7943e-10	1.09434e-09	1.85667e-09	-1.55853e-10	-2.65326e-10	-3.1946e-10	-4.31573e-11	9.76998e-10	2.77645e-09	5.24566e-09	8.2256e-09	1.16519e-08
0.370854	-4.85322e-11	-2.18862e-11	-1.47465e-11	2.32792e-11	8.62411e-11	2.51462e-10	5.77887e-10	1.09125e-09	1.85204e-09	-1.58958e-10	-2.47107e-10	-3.27131e-10	-3.55319e-11	9.84588e-10	2.78391e-09	5.25168e-09	8.22417e-09	1.1658e-08
0.371104	-4.23591e-11	-2.34295e-11	-1.16599e-11	1.71061e-11	8.31545e-11	2.46832e-10	5.748e-10	1.09897e-09	1.85513e-09	-1.61972e-10	-2.59135e-10	-3.27131e-10	-3.4025e-11	9.87692e-10	2.76272e-09	5.23955e-09	8.22415e-09	1.16657e-08
0.371354	-4.39024e-11	-1.72563e-11	-1.62898e-11	2.01926e-11	9.0871e-11	2.60721e-10	5.82516e-10	1.08045e-09	1.84741e-09	-1.52885e-10	-2.48623e-10	-3.19469e-10	-4.46187e-11	9.89108e-10	2.78243e-09	5.24409e-09	8.22267e-09	1.16687e-08
0.371604	-4.54456e-11	-2.03429e-11	-1.93763e-11	1.40195e-11	8.16113e-11	2.54548e-10	5.73257e-10	1.08508e-09	1.84896e-09	-1.60483e-10	-2.63701e-10	-3.13359e-10	-3.24999e-11	9.67812e-10	2.78407e-09	5.25023e-09	8.23029e-09	1.16657e-08
0.371854	-4.69889e-11	-3.11459e-11	-8.57335e-12	1.55628e-11	8.62411e-11	2.56092e-10	5.73257e-10	1.09588e-09	1.84741e-09	-1.65022e-10	-2.45546e-10	-3.19414e-10	-3.54864e-11	9.75328e-10	2.78408e-09	5.2533e-09	8.23037e-09	1.16702e-08
0.372104	-5.00755e-11	-1.72563e-11	-1.32032e-11	2.17359e-11	9.0871e-11	2.56092e-10	5.76343e-10	1.08662e-09	1.84124e-09	-1.51342e-10	-2.54551e-10	-3.17989e-10	-3.70843e-11	9.78433e-10	2.78404e-09	5.25025e-09	8.2364e-09	1.16596e-08
0.372354	-4.69889e-11	-1.57131e-11	-1.32032e-11	1.71061e-11	9.0871e-11	2.60721e-10	5.7017e-10	1.09588e-09	1.84278e-09	-1.54337e-10	-2.4856e-10	-3.28601e-10	-4.61802e-11	9.79976e-10	2.77642e-09	5.24724e-09	8.22576e-09	1.16642e-08
0.372604	-5.00755e-11	-2.49728e-11	-1.32032e-11	2.17359e-11	8.77844e-11	2.53005e-10	5.80973e-10	1.1036e-09	1.8505e-09	-1.58904e-10	-2.57665e-10	-3.19487e-10	-3.55592e-11	9.79985e-10	2.77797e-09	5.25631e-09	8.22418e-09	1.16717e-08
0.372854	-3.92725e-11	-2.18862e-11	3.77292e-12	2.32792e-11	8.46978e-11	2.54548e-10	5.6554e-10	1.08354e-09	1.8505e-09	-1.54383e-10	-2.56194e-10	-3.14903e-10	-3.55137e-11	9.80021e-10	2.79017e-09	5.24725e-09	8.22565e-09	1.16611e-08
0.373104	-3.92725e-11	-2.34295e-11	-1.47465e-11	2.01926e-11	8.93277e-11	2.53005e-10	5.76343e-10	1.09588e-09	1.85667e-09	-1.58822e-10	-2.5613e-10	-3.22501e-10	-3.85639e-11	9.86049e-10	2.78866e-09	5.25177e-09	8.21804e-09	1.16625e-08
0.373354	-4.69889e-11	-2.49728e-11	-8.5693e-13	2.01926e-11	8.46978e-11	2.56092e-10	5.748e-10	1.09897e-09	1.85204e-09	-1.40721e-10	-2.47126e-10	-3.22519e-10	-3.85457e-11	9.73894e-10	2.77801e-09	5.25176e-09	8.21956e-09	1.16489e-08
0.373604	-4.23591e-11	-2.96026e-11	-5.48678e-12	7.84638e-12	8.93277e-11	2.54548e-10	5.71713e-10	1.09279e-09	1.86439e-09	-1.69479e-10	-2.71354e-10	-3.17926e-10	-3.24635e-11	9.75355e-10	2.78405e-09	5.24573e-09	8.22563e-09	1.16641e-08
0.373854	-4.69889e-11	-2.34295e-11	-1.16599e-11	1.40195e-11	8.31545e-11	2.60721e-10	5.76343e-10	1.09434e-09	1.85359e-09	-1.51396e-10	-2.51692e-10	-3.14894e-10	-3.55228e-11	9.76853e-10	2.78411e-09	5.25784e-09	8.21966e-09	1.16703e-08
0.374104	-4.69889e-11	-1.87996e-11	-1.32032e-11	1.71061e-11	8.16113e-11	2.54548e-10	5.8406e-10	1.08971e-09	1.85822e-09	-1.58931e-10	-2.54633e-10	-3.22492e-10	-4.3121e-11	9.70789e-10	2.78863e-09	5.24881e-09	8.23638e-09	1.16764e-08
0.374355	-4.23591e-11	-2.18862e-11	-5.48678e-12	1.71061e-11	8.16113e-11	2.60721e-10	5.76343e-10	1.08199e-09	1.86439e-09	-1.6199e-10	-2.56149e-10	-3.21012e-10	-3.54955e-11	9.75291e-10	2.77953e-09	5.25642e-09	8.23193e-09	1.16642e-08
0.374605	-4.39024e-11	-2.49728e-11	-7.03006e-12	1.24762e-11	8.62411e-11	2.51462e-10	5.7943e-10	1.08662e-09	1.85359e-09	-1.55926e-10	-2.51583e-10	-3.21021e-10	-2.79611e-11	9.69273e-10	2.78249e-09	5.264e-09	8.23647e-09	1.16703e-08
0.374855	-5.47053e-11	-1.72563e-11	-7.03006e-12	7.84638e-12	8.77844e-11	2.53005e-10	5.76343e-10	1.09897e-09	1.85667e-09	-1.5894e-10	-2.51555e-10	-3.24026e-10	-5.06918e-11	9.78396e-10	2.77797e-09	5.2489e-09	8.235e-09	1.16825e-08
0.375105	-4.69889e-11	-2.49728e-11	-5.48678e-12	1.71061e-11	8.93277e-11	2.54548e-10	5.8406e-10	1.09588e-09	1.85359e-09	-1.58931e-10	-2.51583e-10	-3.16528e-10	-3.40887e-11	9.79921e-10	2.78405e-09	5.26561e-09	8.23953e-09	1.16674e-08
0.375355	-4.39024e-11	-1.72563e-11	-5.48678e-12	1.55628e-11	7.54381e-11	2.51462e-10	5.76343e-10	1.08971e-09	1.85359e-09	-1.5431e-10	-2.56203e-10	-3.34701e-10	-4.00617e-11	9.70844e-10	2.78407e-09	5.27022e-09	8.23346e-09	1.16764e-08
0.375605	-4.39024e-11	-2.34295e-11	-1.01166e-11	1.24762e-11	8.16113e-11	2.57635e-10	5.82516e-10	1.09897e-09	1.84587e-09	-1.46776e-10	-2.6382e-10	-3.21094e-10	-3.55501e-11	9.81501e-10	2.78259e-09	5.25954e-09	8.23499e-09	1.16719e-08
0.375855	-4.69889e-11	-2.03429e-11	-3.9435e-12	1.40195e-11	8.62411e-11	2.59178e-10	5.68627e-10	1.08662e-09	1.85359e-09	-1.66575e-10	-2.5771e-10	-3.22537e-10	-4.00617e-11	9.87601e-10	2.78861e-09	5.25337e-09	8.24107e-09	1.16765e-08
0.376105	-4.69889e-11	-2.80593e-11	-7.03006e-12	1.86494e-11	8.77844e-11	2.51462e-10	5.6554e-10	1.08354e-09	1.85667e-09	-1.6967e-10	-2.48605e-10	-3.22519e-10	-3.40159e-11	9.76989e-10	2.778e-09	5.25339e-09	8.23655e-09	1.16765e-08
0.376355	-5.00755e-11	-2.80593e-11	-5.48678e-12	1.55628e-11	8.62411e-11	2.51462e-10	5.748e-10	1.09742e-09	1.85513e-09	-1.57506e-10	-2.62204e-10	-3.17962e-10	-3.85366e-11	9.81474e-10	2.78249e-09	5.26252e-09	8.23962e-09	1.16873e-08
0.376605	-4.54456e-11	-2.18862e-11	-3.9435e-12	1.86494e-11	8.77844e-11	2.48375e-10	5.76343e-10	1.08508e-09	1.86284e-09	-1.60456e-10	-2.50067e-10	-3.21021e-10	-3.54955e-11	9.76917e-10	2.77804e-09	5.25949e-09	8.24726e-09	1.16979e-08
0.376855	-4.08158e-11	-2.18862e-11	-3.9435e-12	1.55628e-11	8.62411e-11	2.59178e-10	5.76343e-10	1.09125e-09	1.85513e-09	-1.55926e-10	-2.46962e-10	-3.27076e-10	-3.24726e-11	9.75382e-10	2.79472e-09	5.25343e-09	8.2473e-09	1.16812e-08
0.377105	-4.85322e-11	-2.96026e-11	6.86356e-13	1.09329e-11	8.62411e-11	2.56092e-10	5.82516e-10	1.07891e-09	1.8613e-09	-1.60438e-10	-2.50039e-10	-3.16464e-10	-4.00526e-11	9.78451e-10	2.78412e-09	5.26252e-09	8.24576e-09	1.16796e-08
0.377355	-5.16188e-11	-2.6516e-11	-1.47465e-11	1.86494e-11	8.46978e-11	2.56092e-10	5.73257e-10	1.07736e-09	1.86747e-09	-1.54428e-10	-2.57665e-10	-3.2093e-10	-3.55137e-11	9.83053e-10	2.77947e-09	5.25951e-09	8.24432e-09	1.1675e-08
0.377605	-5.00755e-11	-2.96026e-11	-1.01166e-11	2.48225e-11	8.62411e-11	2.54548e-10	5.76343e-10	1.09279e-09	1.86902e-09	-1.64977e-10	-2.54624e-10	-3.13359e-10	-3.40068e-11	9.8456e-10	2.77793e-09	5.25644e-09	8.25944e-09	1.16887e-08
0.377856	-5.47053e-11	-2.34295e-11	-1.32032e-11	1.24762e-11	8.77844e-11	2.60721e-10	5.748e-10	1.09434e-09	1.84741e-09	-1.49817e-10	-2.48551e-10	-3.1788e-10	-4.16232e-11	9.77035e-10	2.77941e-09	5.25651e-09	8.2397e-09	1.16812e-08
0.378106	-5.00755e-11	-2.03429e-11	-1.16599e-11	1.09329e-11	8.93277e-11	2.48375e-10	5.748e-10	1.08045e-09	1.85204e-09	-1.54283e-10	-2.5614e-10	-3.16382e-10	-4.16414e-11	9.92186e-10	2.77335e-09	5.27021e-09	8.23805e-09	1.16873e-08
0.378356	-4.69889e-11	-2.03429e-11	-1.16599e-11	1.55628e-11	8.77844e-11	2.71524e-10	5.748e-10	1.08662e-09	1.85204e-09	-1.51287e-10	-2.56221e-10	-3.16382e-10	-3.71298e-11	9.83099e-10	2.77944e-09	5.26716e-09	8.23648e-09	1.16935e-08
0.378606	-3.46427e-11	-2.49728e-11	-1.16599e-11	1.71061e-11	8.46978e-11	2.54548e-10	5.7943e-10	1.08354e-09	1.86284e-09	-1.55863e-10	-2.62222e-10	-3.17926e-10	-4.77235e-11	9.78505e-10	2.78253e-09	5.25345e-09	8.23041e-09	1.16995e-08
0.378856	-4.39024e-11	-2.03429e-11	-1.32032e-11	2.17359e-11	8.31545e-11	2.54548e-10	5.7943e-10	1.09279e-09	1.86439e-09	-1.58922e-10	-2.45509e-10	-3.20939e-10	-3.86731e-11	9.8456e-10	2.78412e-09	5.25799e-09	8.23802e-09	1.16904e-08
0.379106	-4.08158e-11	-2.6516e-11	-1.32032e-11	1.09329e-11	8.31545e-11	2.53005e-10	5.71713e-10	1.08662e-09	1.86593e-09	-1.55908e-10	-2.50021e-10	-3.13359e-10	-4.47279e-11	9.81547e-10	2.79168e-09	5.2656e-09	8.24118e-09	1.16919e-08
0.379356	-5.00755e-11	-2.34295e-11	-1.32032e-11	1.55628e-11	8.93277e-11	2.62265e-10	5.82516e-10	1.09125e-09	1.86902e-09	-1.58995e-10	-2.56149e-10	-3.1788e-10	-4.62166e-11	9.81501e-10	2.77959e-09	5.25956e-09	8.25184e-09	1.16965e-08
0.379606	-4.39024e-11	-2.49728e-11	-1.01166e-11	1.40195e-11	8.77844e-11	2.53005e-10	5.76343e-10	1.09588e-09	1.86593e-09	-1.68091e-10	-2.5614e-10	-3.16391e-10	-3.40796e-11	9.76944e-10	2.79018e-09	5.26099e-09	8.24574e-09	1.16966e-08
0.379856	-4.39024e-11	-2.18862e-11	-1.62898e-11	1.24762e-11	8.62411e-11	2.48375e-10	5.76343e-10	1.09434e-09	1.86593e-09	-1.55963e-10	-2.4856e-10	-3.17862e-10	-4.313e-11	9.79976e-10	2.78867e-09	5.25193e-09	8.23512e-09	1.16996e-08
0.380106	-5.00755e-11	-2.03429e-11	-1.32032e-11	1.55628e-11	9.39575e-11	2.57635e-10	5.77887e-10	1.09588e-09	1.8721e-09	-1.58922e-10	-2.56112e-10	-3.103e-10	-3.85912e-11	9.81519e-10	2.77959e-09	5.26563e-09	8.25028e-09	1.16997e-08
0.380356	-3.77292e-11	-2.80593e-11	-1.7833e-11	9.38966e-12	8.62411e-11	2.59178e-10	5.73257e-10	1.09588e-09	1.87365e-09	-1.55881e-10	-2.51601e-10	-3.19387e-10	-3.55501e-11	9.8151e-10	2.79319e-09	5.27021e-09	8.24737e-09	1.17058e-08
0.380606	-4.54456e-11	-2.6516e-11	-8.57335e-12	1.40195e-11	8.16113e-11	2.56092e-10	5.68627e-10	1.09588e-09	1.84896e-09	-1.54347e-10	-2.54587e-10	-3.16319e-10	-4.15686e-11	9.78424e-10	2.78106e-09	5.25806e-09	8.25491e-09	1.17135e-08
0.380856	-3.61859e-11	-1.72563e-11	-1.32032e-11	1.86494e-11	8.62411e-11	2.65351e-10	5.77887e-10	1.10205e-09	1.85513e-09	-1.55863e-10	-2.48514e-10	-3.04209e-10	-3.09931e-11	9.7236e-10	2.77954e-09	5.26105e-09	8.24275e-09	1.1715e-08
0.381106	-4.39024e-11	-2.03429e-11	-1.32032e-11	2.01926e-11	8.16113e-11	2.59178e-10	5.80973e-10	1.09742e-09	1.85359e-09	-1.55881e-10	-2.49957e-10	-3.22392e-10	-4.1605e-11	9.81428e-10	2.79166e-09	5.2641e-09	8.24272e-09	1.17028e-08
0.381357	-4.54456e-11	-2.96026e-11	-1.01166e-11	9.38966e-12	8.16113e-11	2.54548e-10	5.77887e-10	1.09742e-09	1.85513e-09	-1.57506e-10	-2.42377e-10	-3.14875e-10	-4.16414e-11	9.73876e-10	2.78112e-09	5.26108e-09	8.25034e-09	1.17088e-08
0.381607	-5.31621e-11	-1.87996e-11	-1.01166e-11	1.86494e-11	8.77844e-11	2.56092e-10	5.82516e-10	1.09742e-09	1.85513e-09	-1.74209e-10	-2.48423e-10	-3.14839e-10	-3.70843e-11	9.76898e-10	2.79019e-09	5.26265e-09	8.24885e-09	1.17027e-08
0.381857	-5.16188e-11	-2.34295e-11	-1.16599e-11	1.55628e-11	7.85247e-11	2.59178e-10	5.748e-10	1.09434e-09	1.86284e-09	-1.60511e-10	-2.46925e-10	-3.16328e-10	-4.00981e-11	9.79985e-10	2.78875e-09	5.27331e-09	8.24739e-09	1.16982e-08
0.382107	-3.77292e-11	-2.6516e-11	-7.03006e-12	1.55628e-11	8.93277e-11	2.56092e-10	5.7017e-10	1.10051e-09	1.8721e-09	-1.48292e-10	-2.45391e-10	-3.10255e-10	-3.86094e-11	9.83044e-10	2.79324e-09	5.26879e-09	8.25954e-09	1.17103e-08
0.382357	-4.39024e-11	-2.80593e-11	-1.32032e-11	1.40195e-11	8.16113e-11	2.56092e-10	5.85603e-10	1.09125e-09	1.86747e-09	-1.58885e-10	-2.45337e-10	-3.1325e-10	-4.16414e-11	9.81519e-10	2.78122e-09	5.26729e-09	8.25353e-09	1.17073e-08
0.382607	-3.77292e-11	-3.11459e-11	-5.48678e-12	1.09329e-11	8.46978e-11	2.51462e-10	5.82516e-10	1.08971e-09	1.87056e-09	-1.5746e-10	-2.37711e-10	-3.10264e-10	-4.01527e-11	9.78451e-10	2.80535e-09	5.27639e-09	8.25501e-09	1.17028e-08
0.382857	-4.69889e-11	-2.80593e-11	-8.57335e-12	1.24762e-11	8.16113e-11	2.57635e-10	5.748e-10	1.08508e-09	1.86439e-09	-1.63488e-10	-2.37729e-10	-3.1788e-10	-4.31664e-11	9.76944e-10	2.77357e-09	5.26889e-09	8.25503e-09	1.17073e-08
0.383107	-4.54456e-11	-2.18862e-11	6.86356e-13	1.86494e-11	9.0871e-11	2.59178e-10	5.748e-10	1.09897e-09	1.86902e-09	-1.52867e-10	-2.48414e-10	-3.19405e-10	-3.86276e-11	9.83008e-10	2.7901e-09	5.28102e-09	8.25656e-09	1.17089e-08
0.383357	-4.69889e-11	-1.87996e-11	-3.9435e-12	1.71061e-11	8.31545e-11	2.49919e-10	5.76343e-10	1.09897e-09	1.85976e-09	-1.55863e-10	-2.50021e-10	-3.11862e-10	-4.16596e-11	9.78478e-10	2.78112e-09	5.27651e-09	8.25661e-09	1.17104e-08
0.383607	-4.69889e-11	-2.34295e-11	-1.32032e-11	1.24762e-11	8.31545e-11	2.57635e-10	5.73257e-10	1.09742e-09	1.86747e-09	-1.57415e-10	-2.53035e-10	-3.23944e-10	-4.31391e-11	9.80012e-10	2.79323e-09	5.27642e-09	8.26418e-09	1.17105e-08
0.383857	-3.77292e-11	-1.72563e-11	-1.62898e-11	9.38966e-12	8.93277e-11	2.48375e-10	5.748e-10	1.09897e-09	1.86439e-09	-1.58976e-10	-2.45446e-10	-3.11843e-10	-3.24817e-11	9.86113e-10	2.78717e-09	5.26577e-09	8.25507e-09	1.1715e-08
0.384107	-5.31621e-11	-2.18862e-11	-2.40021e-12	1.71061e-11	8.77844e-11	2.54548e-10	5.8406e-10	1.10514e-09	1.86593e-09	-1.63524e-10	-2.48432e-10	-3.16355e-10	-3.39795e-11	9.84615e-10	2.78109e-09	5.27027e-09	8.25353e-09	1.17074e-08
0.384357	-4.54456e-11	-2.18862e-11	-1.32032e-11	2.17359e-11	8.46978e-11	2.54548e-10	5.76343e-10	1.10205e-09	1.8505e-09	-1.5747e-10	-2.45409e-10	-3.17916e-10	-4.00981e-11	9.83063e-10	2.79019e-09	5.26729e-09	8.26109e-09	1.17165e-08
0.384607	-4.69889e-11	-2.34295e-11	-2.40021e-12	1.71061e-11	8.62411e-11	2.51462e-10	5.67084e-10	1.09125e-09	1.86439e-09	-1.60447e-10	-2.4688e-10	-3.19405e-10	-4.16505e-11	9.80012e-10	2.78875e-09	5.27484e-09	8.25047e-09	1.17121e-08
0.384858	-5.31621e-11	-2.03429e-11	-1.62898e-11	1.55628e-11	9.55008e-11	2.48375e-10	5.748e-10	1.1036e-09	1.8613e-09	-1.54392e-10	-2.4078e-10	-3.11852e-10	-4.00981e-11	9.81501e-10	2.79325e-09	5.26579e-09	8.25347e-09	1.17227e-08
0.385108	-4.23591e-11	-3.11459e-11	6.86356e-13	1.55628e-11	8.93277e-11	2.42202e-10	5.73257e-10	1.10205e-09	1.86747e-09	-1.58876e-10	-2.39254e-10	-3.22437e-10	-3.40432e-11	9.78505e-10	2.78267e-09	5.27485e-09	8.25505e-09	1.17136e-08
0.385358	-5.00755e-11	-2.34295e-11	-7.03006e-12	1.40195e-11	8.62411e-11	2.49919e-10	5.748e-10	1.10051e-09	1.86747e-09	-1.49799e-10	-2.45346e-10	-3.14894e-10	-4.31391e-11	9.86085e-10	2.79322e-09	5.26881e-09	8.26114e-09	1.17135e-08
0.385608	-4.69889e-11	-2.18862e-11	-1.16599e-11	1.55628e-11	8.31545e-11	2.51462e-10	5.80973e-10	1.09125e-09	1.84433e-09	-1.57397e-10	-2.45364e-10	-3.17926e-10	-4.01345e-11	9.81574e-10	2.78413e-09	5.26879e-09	8.25812e-09	1.17182e-08
0.385858	-4.23591e-11	-2.03429e-11	-8.57335e-12	6.30309e-12	8.62411e-11	2.53005e-10	5.76343e-10	1.08662e-09	1.85667e-09	-1.6199e-10	-2.42296e-10	-3.22519e-10	-3.8573e-11	9.84551e-10	2.78257e-09	5.2718e-09	8.2566e-09	1.17319e-08
0.386108	-3.92725e-11	-2.03429e-11	-7.03006e-12	1.55628e-11	9.24142e-11	2.54548e-10	5.8406e-10	1.09742e-09	1.8613e-09	-1.57451e-10	-2.39264e-10	-3.22501e-10	-3.5541e-11	9.7698e-10	2.78565e-09	5.26572e-09	8.26117e-09	1.17228e-08
0.386358	-4.54456e-11	-1.87996e-11	-8.57335e-12	2.63658e-11	8.77844e-11	2.51462e-10	5.76343e-10	1.09434e-09	1.86902e-09	-1.58858e-10	-2.45291e-10	-3.14894e-10	-4.00799e-11	9.83017e-10	2.79176e-09	5.26573e-09	8.26121e-09	1.17243e-08
0.386608	-4.85322e-11	-2.03429e-11	-1.01166e-11	1.55628e-11	8.93277e-11	2.57635e-10	5.77887e-10	1.09742e-09	1.86439e-09	-1.43716e-10	-2.3635e-10	-3.17935e-10	-3.70661e-11	9.8004e-10	2.79181e-09	5.27337e-09	8.26272e-09	1.17152e-08
0.386858	-4.69889e-11	-2.80593e-11	-1.32032e-11	1.55628e-11	8.62411e-11	2.49919e-10	5.748e-10	1.08817e-09	1.85204e-09	-1.60383e-10	-2.65172e-10	-3.24044e-10	-3.85639e-11	9.86113e-10	2.79333e-09	5.27647e-09	8.26125e-09	1.17288e-08
0.387108	-4.85322e-11	-2.96026e-11	-1.47465e-11	1.40195e-11	8.46978e-11	2.54548e-10	5.6091e-10	1.09434e-09	1.85667e-09	-1.57424e-10	-2.48569e-10	-3.22546e-10	-3.70661e-11	9.84624e-10	2.79335e-09	5.27641e-09	8.26888e-09	1.17136e-08
0.387358	-5.31621e-11	-2.34295e-11	-8.57335e-12	7.84638e-12	8.46978e-11	2.57635e-10	5.80973e-10	1.09434e-09	1.85359e-09	-1.55935e-10	-2.4846e-10	-3.2103e-10	-4.00981e-11	9.84578e-10	2.79484e-09	5.26423e-09	8.2704e-09	1.17196e-08
0.387608	-4.54456e-11	-1.87996e-11	-7.03006e-12	2.17359e-11	8.46978e-11	2.54548e-10	5.71713e-10	1.09434e-09	1.86902e-09	-1.65049e-10	-2.4688e-10	-3.24017e-10	-3.84729e-11	9.78533e-10	2.78877e-09	5.26721e-09	8.26279e-09	1.17152e-08
0.387858	-4.54456e-11	-2.96026e-11	-1.47465e-11	1.55628e-11	7.54381e-11	2.59178e-10	5.77887e-10	1.09588e-09	1.86747e-09	-1.60456e-10	-2.37775e-10	-3.14939e-10	-1.88288e-11	9.87601e-10	2.79183e-09	5.26725e-09	8.26436e-09	1.17273e-08
0.388108	-4.54456e-11	-2.18862e-11	-1.01166e-11	1.71061e-11	7.85247e-11	2.60721e-10	5.73257e-10	1.09588e-09	1.85513e-09	-1.48237e-10	-2.46843e-10	-3.23962e-10	-5.06554e-11	9.80085e-10	2.79944e-09	5.27179e-09	8.27807e-09	1.17197e-08
0.388358	-4.39024e-11	-2.34295e-11	-8.57335e-12	2.17359e-11	8.0068e-11	2.49919e-10	5.77887e-10	1.08817e-09	1.86747e-09	-1.49717e-10	-2.42296e-10	-3.1188e-10	-3.71389e-11	9.89117e-10	2.79488e-09	5.26576e-09	8.27507e-09	1.17182e-08
0.388609	-3.92725e-11	-1.87996e-11	-8.57335e-12	1.55628e-11	8.46978e-11	2.60721e-10	5.748e-10	1.09742e-09	1.86439e-09	-1.5431e-10	-2.37775e-10	-3.22437e-10	-4.00617e-11	9.77017e-10	2.78885e-09	5.27181e-09	8.2689e-09	1.17228e-08
0.388859	-5.16188e-11	-2.80593e-11	-2.40021e-12	2.48225e-11	8.93277e-11	2.54548e-10	5.73257e-10	1.08817e-09	1.85359e-09	-1.55853e-10	-2.51464e-10	-3.14875e-10	-3.24908e-11	9.84542e-10	2.80553e-09	5.27033e-09	8.26127e-09	1.17228e-08
0.389109	-4.69889e-11	-3.11459e-11	-1.16599e-11	2.32792e-11	8.93277e-11	2.56092e-10	5.73257e-10	1.09279e-09	1.85822e-09	-1.54356e-10	-2.5003e-10	-3.14848e-10	-3.85275e-11	9.80058e-10	2.79646e-09	5.27189e-09	8.26579e-09	1.17274e-08
0.389359	-4.69889e-11	-2.80593e-11	-1.16599e-11	1.24762e-11	8.93277e-11	2.57635e-10	5.6554e-10	1.09279e-09	1.85359e-09	-1.57388e-10	-2.5151e-10	-3.17871e-10	-3.55319e-11	9.8761e-10	2.79186e-09	5.27953e-09	8.26429e-09	1.17289e-08
0.389609	-4.85322e-11	-2.03429e-11	-1.16599e-11	2.32792e-11	9.0871e-11	2.59178e-10	5.7943e-10	1.08662e-09	1.85822e-09	-1.55853e-10	-2.45446e-10	-3.13387e-10	-3.85366e-11	9.80049e-10	2.79795e-09	5.27956e-09	8.26435e-09	1.17275e-08
0.389859	-4.23591e-11	-2.18862e-11	-8.57335e-12	1.24762e-11	9.0871e-11	2.54548e-10	5.71713e-10	1.09588e-09	1.85822e-09	-1.51296e-10	-2.49957e-10	-3.25542e-10	-3.39613e-11	9.83063e-10	2.7995e-09	5.27806e-09	8.27498e-09	1.17351e-08
0.390109	-4.39024e-11	-2.03429e-11	-1.01166e-11	2.01926e-11	8.46978e-11	2.62265e-10	5.73257e-10	1.08508e-09	1.85822e-09	-1.55835e-10	-2.45418e-10	-3.22555e-10	-3.08748e-11	9.84615e-10	2.79796e-09	5.28108e-09	8.26748e-09	1.17397e-08
0.390359	-4.23591e-11	-2.96026e-11	-8.57335e-12	1.55628e-11	9.55008e-11	2.53005e-10	5.82516e-10	1.08199e-09	1.86593e-09	-1.54246e-10	-2.46925e-10	-3.21021e-10	-2.93952e-11	9.86122e-10	2.79494e-09	5.27801e-09	8.27803e-09	1.17336e-08
0.390609	-3.61859e-11	-2.03429e-11	-7.03006e-12	1.86494e-11	8.16113e-11	2.51462e-10	5.80973e-10	1.09434e-09	1.85667e-09	-1.39059e-10	-2.48423e-10	-3.22501e-10	-4.00435e-11	9.81574e-10	2.80098e-09	5.2719e-09	8.26445e-09	1.17274e-08
0.390859	-3.46427e-11	-2.80593e-11	-8.57335e-12	2.48225e-11	8.62411e-11	2.60721e-10	5.85603e-10	1.09125e-09	1.86593e-09	-1.51151e-10	-2.42368e-10	-3.16428e-10	-3.71025e-11	9.84588e-10	2.79344e-09	5.27344e-09	8.27805e-09	1.17244e-08
0.391109	-4.23591e-11	-2.49728e-11	-8.57335e-12	1.40195e-11	8.77844e-11	2.51462e-10	5.76343e-10	1.09588e-09	1.86593e-09	-1.48237e-10	-2.4846e-10	-3.19451e-10	-4.47188e-11	9.83099e-10	2.80252e-09	5.28111e-09	8.27208e-09	1.17305e-08
0.391359	-3.92725e-11	-2.18862e-11	-1.47465e-11	1.71061e-11	7.69814e-11	2.56092e-10	5.82516e-10	1.08045e-09	1.86284e-09	-1.58813e-10	-2.53044e-10	-3.2103e-10	-4.62621e-11	9.8614e-10	2.798e-09	5.28718e-09	8.27972e-09	1.17351e-08
0.391609	-4.39024e-11	-2.03429e-11	-7.03006e-12	1.09329e-11	8.46978e-11	2.60721e-10	5.82516e-10	1.09279e-09	1.86593e-09	-1.45196e-10	-2.48514e-10	-3.27067e-10	-4.16869e-11	9.86131e-10	2.79799e-09	5.27503e-09	8.28741e-09	1.17322e-08
0.391859	-4.69889e-11	-2.18862e-11	-8.57335e-12	9.38966e-12	9.0871e-11	2.62265e-10	5.90233e-10	1.08662e-09	1.86747e-09	-1.5274e-10	-2.51528e-10	-3.14939e-10	-4.01345e-11	9.81556e-10	2.80104e-09	5.27798e-09	8.29203e-09	1.17474e-08
0.39211	-4.39024e-11	-2.96026e-11	-1.7833e-11	1.86494e-11	8.31545e-11	2.54548e-10	5.71713e-10	1.09588e-09	1.86902e-09	-1.52776e-10	-2.49976e-10	-3.20976e-10	-4.00799e-11	9.81537e-10	2.80106e-09	5.27344e-09	8.29201e-09	1.17428e-08
0.39236	-4.23591e-11	-2.03429e-11	-1.01166e-11	1.86494e-11	9.39575e-11	2.53005e-10	5.73257e-10	1.08971e-09	1.86439e-09	-1.51224e-10	-2.42377e-10	-3.22546e-10	-3.25363e-11	9.83063e-10	2.80105e-09	5.27495e-09	8.28292e-09	1.17383e-08
0.39261	-4.69889e-11	-1.87996e-11	-1.62898e-11	2.32792e-11	8.46978e-11	2.57635e-10	5.76343e-10	1.09125e-09	1.86439e-09	-1.46639e-10	-2.48359e-10	-3.2409e-10	-4.61438e-11	9.83053e-10	2.79954e-09	5.27806e-09	8.29346e-09	1.17473e-08
0.39286	-5.00755e-11	-2.80593e-11	-7.03006e-12	1.40195e-11	9.55008e-11	2.59178e-10	5.71713e-10	1.09897e-09	1.86439e-09	-1.46621e-10	-2.3625e-10	-3.25606e-10	-3.40887e-11	9.8004e-10	2.80258e-09	5.28566e-09	8.2798e-09	1.17307e-08
0.39311	-4.08158e-11	-1.57131e-11	-5.48678e-12	1.86494e-11	8.16113e-11	2.59178e-10	5.76343e-10	1.09279e-09	1.87673e-09	-1.48155e-10	-2.45318e-10	-3.2261e-10	-4.46915e-11	9.86094e-10	2.80258e-09	5.27966e-09	8.27972e-09	1.17458e-08
0.39336	-4.54456e-11	-2.18862e-11	-1.7833e-11	2.17359e-11	8.77844e-11	2.60721e-10	5.77887e-10	1.08354e-09	1.87519e-09	-1.49735e-10	-2.43875e-10	-3.30153e-10	-4.47006e-11	9.81556e-10	2.798e-09	5.28871e-09	8.28129e-09	1.17337e-08
0.39361	-4.39024e-11	-2.03429e-11	-1.32032e-11	1.71061e-11	7.85247e-11	2.54548e-10	5.85603e-10	1.09279e-09	1.88445e-09	-1.57351e-10	-2.48405e-10	-3.19551e-10	-3.55319e-11	9.81547e-10	2.79801e-09	5.27813e-09	8.28735e-09	1.17351e-08
0.39386	-4.08158e-11	-2.96026e-11	-1.16599e-11	2.17359e-11	8.62411e-11	2.56092e-10	5.82516e-10	1.09588e-09	1.84433e-09	-1.54347e-10	-2.42332e-10	-3.23999e-10	-3.24908e-11	9.84606e-10	2.80404e-09	5.28419e-09	8.27982e-09	1.17397e-08
0.39411	-5.16188e-11	-2.96026e-11	-1.16599e-11	1.55628e-11	9.24142e-11	2.54548e-10	5.90233e-10	1.09588e-09	1.88136e-09	-1.54301e-10	-2.42332e-10	-3.13441e-10	-4.31119e-11	9.86195e-10	2.79189e-09	5.2888e-09	8.29041e-09	1.17429e-08
0.39436	-4.69889e-11	-3.11459e-11	-1.32032e-11	2.17359e-11	8.62411e-11	2.54548e-10	5.8406e-10	1.09434e-09	1.86593e-09	-1.49744e-10	-2.48441e-10	-3.28556e-10	-3.70843e-11	9.93775e-10	2.79491e-09	5.28737e-09	8.28286e-09	1.17474e-08
0.39461	-4.39024e-11	-2.49728e-11	-8.57335e-12	9.38966e-12	8.46978e-11	2.48375e-10	5.76343e-10	1.08662e-09	1.87056e-09	-1.5273e-10	-2.49994e-10	-3.16473e-10	-3.86003e-11	9.84679e-10	2.80249e-09	5.29936e-09	8.28434e-09	1.17429e-08
0.39486	-4.69889e-11	-1.72563e-11	-1.47465e-11	1.86494e-11	8.62411e-11	2.62265e-10	5.748e-10	1.09434e-09	1.85667e-09	-1.46639e-10	-2.48541e-10	-3.20985e-10	-4.31664e-11	9.86122e-10	2.79185e-09	5.26603e-09	8.28438e-09	1.17414e-08
0.39511	-4.23591e-11	-2.49728e-11	-1.32032e-11	1.86494e-11	8.31545e-11	2.53005e-10	5.82516e-10	1.10823e-09	1.85667e-09	-1.45141e-10	-2.59135e-10	-3.22574e-10	-4.01345e-11	9.8161e-10	2.79028e-09	5.29027e-09	8.29061e-09	1.1755e-08
0.39536	-4.69889e-11	-2.6516e-11	-1.01166e-11	2.01926e-11	8.31545e-11	2.66895e-10	5.77887e-10	1.09434e-09	1.86902e-09	-1.55817e-10	-2.46998e-10	-3.28638e-10	-3.85548e-11	9.9067e-10	2.79333e-09	5.29649e-09	8.31181e-09	1.17414e-08
0.395611	-3.77292e-11	-2.18862e-11	-1.16599e-11	2.63658e-11	8.62411e-11	2.63808e-10	5.7943e-10	1.09434e-09	1.86284e-09	-1.57333e-10	-2.46934e-10	-3.20994e-10	-3.24999e-11	9.80076e-10	2.79501e-09	5.29352e-09	8.28001e-09	1.17428e-08
0.395861	-3.92725e-11	-1.87996e-11	-1.16599e-11	1.09329e-11	8.93277e-11	2.62265e-10	5.748e-10	1.09279e-09	1.85667e-09	-1.45141e-10	-2.48523e-10	-3.11871e-10	-4.16414e-11	9.84624e-10	2.81772e-09	5.29959e-09	8.29662e-09	1.17429e-08
0.396111	-3.77292e-11	-2.80593e-11	-1.16599e-11	1.55628e-11	8.77844e-11	2.57635e-10	5.748e-10	1.10051e-09	1.87673e-09	-1.45141e-10	-2.59144e-10	-3.23989e-10	-4.62257e-11	9.90688e-10	2.78743e-09	5.2981e-09	8.30127e-09	1.1749e-08
0.396361	-4.54456e-11	-2.6516e-11	-1.01166e-11	1.71061e-11	8.93277e-11	2.54548e-10	5.71713e-10	1.10668e-09	1.87365e-09	-1.57315e-10	-2.4845e-10	-3.19496e-10	-3.86185e-11	9.80058e-10	2.80099e-09	5.29808e-09	8.29671e-09	1.17505e-08
0.396611	-4.08158e-11	-2.49728e-11	-1.16599e-11	1.86494e-11	8.31545e-11	2.62265e-10	5.80973e-10	1.08662e-09	1.86439e-09	-1.52849e-10	-2.34716e-10	-3.20976e-10	-3.70297e-11	9.81492e-10	2.80259e-09	5.29661e-09	8.29514e-09	1.17399e-08
0.396861	-5.16188e-11	-1.72563e-11	-1.93763e-11	2.01926e-11	9.55008e-11	2.56092e-10	5.7943e-10	1.09588e-09	1.87982e-09	-1.58876e-10	-2.43802e-10	-3.17989e-10	-3.39977e-11	9.76971e-10	2.80256e-09	5.30564e-09	8.29216e-09	1.1752e-08
0.397111	-4.39024e-11	-2.03429e-11	-1.47465e-11	1.71061e-11	8.46978e-11	2.57635e-10	5.77887e-10	1.08817e-09	1.86284e-09	-1.51315e-10	-2.46898e-10	-3.27076e-10	-3.86094e-11	9.84542e-10	2.79493e-09	5.28747e-09	8.30584e-09	1.17537e-08
0.397361	-4.69889e-11	-3.11459e-11	-1.47465e-11	1.86494e-11	8.0068e-11	2.54548e-10	5.80973e-10	1.10051e-09	1.87056e-09	-1.55835e-10	-2.454e-10	-3.19514e-10	-4.77599e-11	9.79994e-10	2.7949e-09	5.29958e-09	8.30137e-09	1.17597e-08
0.397611	-4.69889e-11	-3.26892e-11	-1.16599e-11	2.01926e-11	9.24142e-11	2.53005e-10	5.77887e-10	1.08971e-09	1.86284e-09	-1.54283e-10	-2.46871e-10	-3.20948e-10	-4.31937e-11	9.76944e-10	2.79651e-09	5.30259e-09	8.30438e-09	1.17384e-08
0.397861	-4.85322e-11	-2.34295e-11	-1.32032e-11	2.48225e-11	8.46978e-11	2.54548e-10	5.76343e-10	1.09434e-09	1.86439e-09	-1.45196e-10	-2.39318e-10	-3.1335e-10	-3.55592e-11	9.8151e-10	2.81174e-09	5.28287e-09	8.30286e-09	1.17536e-08
0.398111	-3.92725e-11	-2.34295e-11	-1.32032e-11	2.01926e-11	8.46978e-11	2.59178e-10	5.76343e-10	1.09434e-09	1.86902e-09	-1.57306e-10	-2.49948e-10	-3.16382e-10	-3.85821e-11	9.83072e-10	2.8072e-09	5.29799e-09	8.2998e-09	1.17628e-08
0.398361	-4.85322e-11	-2.6516e-11	-8.5693e-13	1.55628e-11	7.08083e-11	2.56092e-10	5.85603e-10	1.08971e-09	1.86902e-09	-1.51333e-10	-2.49985e-10	-3.20939e-10	-4.16232e-11	9.84624e-10	2.79649e-09	5.29653e-09	8.29975e-09	1.17538e-08
0.398611	-3.77292e-11	-2.18862e-11	-1.47465e-11	1.55628e-11	8.46978e-11	2.53005e-10	5.7943e-10	1.08662e-09	1.87828e-09	-1.60383e-10	-2.45391e-10	-3.14884e-10	-3.70843e-11	9.87565e-10	2.79645e-09	5.29196e-09	8.29522e-09	1.17643e-08
0.398861	-4.54456e-11	-2.80593e-11	-1.16599e-11	1.86494e-11	8.62411e-11	2.56092e-10	5.85603e-10	1.10668e-09	1.87056e-09	-1.49808e-10	-2.42359e-10	-3.1788e-10	-4.01709e-11	9.67866e-10	2.79956e-09	5.295e-09	8.30279e-09	1.17522e-08
0.399111	-5.16188e-11	-2.34295e-11	-1.01166e-11	2.01926e-11	8.31545e-11	2.57635e-10	5.85603e-10	1.09742e-09	1.87673e-09	-1.57388e-10	-2.49948e-10	-3.14839e-10	-5.08101e-11	9.86058e-10	2.81023e-09	5.29654e-09	8.29826e-09	1.17537e-08
0.399362	-4.69889e-11	-3.42325e-11	-8.57335e-12	2.01926e-11	8.31545e-11	2.59178e-10	5.8406e-10	1.09125e-09	1.86747e-09	-1.60492e-10	-2.46971e-10	-3.1335e-10	-4.17323e-11	9.8772e-10	2.80565e-09	5.29652e-09	8.29824e-09	1.17674e-08
0.399612	-4.54456e-11	-2.34295e-11	-8.57335e-12	1.55628e-11	8.46978e-11	2.51462e-10	5.748e-10	1.10205e-09	1.87673e-09	-1.61972e-10	-2.51428e-10	-3.22464e-10	-4.31846e-11	9.92222e-10	2.79499e-09	5.29193e-09	8.29972e-09	1.17598e-08
0.399862	-5.31621e-11	-2.6516e-11	-1.16599e-11	1.71061e-11	9.39575e-11	2.56092e-10	5.82516e-10	1.09279e-09	1.85822e-09	-1.51315e-10	-2.34879e-10	-3.17944e-10	-4.01618e-11	9.78578e-10	2.80104e-09	5.28892e-09	8.29214e-09	1.17507e-08
0.400112	-4.23591e-11	-2.49728e-11	-7.03006e-12	3.09956e-11	8.93277e-11	2.68438e-10	5.87146e-10	1.09588e-09	1.85976e-09	-1.52749e-10	-2.68277e-10	-3.17926e-10	-4.31391e-11	9.87601e-10	2.80412e-09	5.30108e-09	8.29823e-09	1.17568e-08
0.400362	-3.61859e-11	-2.34295e-11	-7.03006e-12	1.86494e-11	8.0068e-11	2.53005e-10	5.85603e-10	1.09125e-09	1.8721e-09	-1.48237e-10	-2.59235e-10	-3.1946e-10	-3.40341e-11	9.80003e-10	2.80257e-09	5.29663e-09	8.30284e-09	1.17751e-08
0.400612	-6.24218e-11	-2.49728e-11	-1.01166e-11	1.09329e-11	9.70441e-11	2.57635e-10	5.85603e-10	1.08971e-09	1.8721e-09	-1.5736e-10	-2.44012e-10	-3.20976e-10	-3.85639e-11	9.75419e-10	2.79501e-09	5.30573e-09	8.30292e-09	1.17646e-08
0.400862	-5.31621e-11	-1.57131e-11	-1.47465e-11	2.17359e-11	8.93277e-11	2.51462e-10	5.7943e-10	1.09279e-09	1.88445e-09	-1.57406e-10	-2.57574e-10	-3.17926e-10	-4.00617e-11	9.81483e-10	2.80865e-09	5.30117e-09	8.31202e-09	1.17706e-08
0.401112	-4.69889e-11	-2.18862e-11	-8.57335e-12	7.84638e-12	8.93277e-11	2.59178e-10	5.87146e-10	1.10051e-09	1.86902e-09	-1.55872e-10	-2.45482e-10	-3.16419e-10	-3.10385e-11	9.8004e-10	2.80112e-09	5.29503e-09	8.30287e-09	1.17691e-08
0.401362	-5.00755e-11	-2.34295e-11	-1.47465e-11	2.01926e-11	7.85247e-11	2.65351e-10	5.80973e-10	1.10977e-09	1.85822e-09	-1.54374e-10	-2.49957e-10	-3.22473e-10	-5.07464e-11	9.87647e-10	2.80417e-09	5.29352e-09	8.29524e-09	1.17676e-08
0.401612	-4.54456e-11	-2.96026e-11	-3.9435e-12	1.40195e-11	8.93277e-11	2.46832e-10	5.7943e-10	1.10823e-09	1.85359e-09	-1.60401e-10	-2.45455e-10	-3.16446e-10	-4.01163e-11	9.86167e-10	2.81176e-09	5.30112e-09	8.30285e-09	1.1769e-08
0.401862	-3.77292e-11	-2.80593e-11	-1.32032e-11	2.01926e-11	8.31545e-11	2.53005e-10	5.71713e-10	1.10977e-09	1.86284e-09	-1.49762e-10	-2.53062e-10	-3.2251e-10	-2.7861e-11	9.86113e-10	2.80266e-09	5.29966e-09	8.30744e-09	1.17646e-08
0.402112	-4.69889e-11	-2.6516e-11	-8.57335e-12	1.55628e-11	9.39575e-11	2.60721e-10	5.87146e-10	1.09897e-09	1.85976e-09	-1.49735e-10	-2.54578e-10	-3.22537e-10	-2.93588e-11	9.78487e-10	2.80267e-09	5.3027e-09	8.30295e-09	1.17798e-08
0.402362	-3.92725e-11	-1.57131e-11	-8.57335e-12	1.86494e-11	8.62411e-11	2.56092e-10	5.76343e-10	1.10205e-09	1.86284e-09	-1.55826e-10	-2.45409e-10	-3.21003e-10	-3.70024e-11	9.7846e-10	2.81329e-09	5.30122e-09	8.31202e-09	1.17844e-08
0.402612	-4.08158e-11	-2.6516e-11	-1.16599e-11	1.24762e-11	8.62411e-11	2.53005e-10	5.7943e-10	1.10205e-09	1.86902e-09	-1.54319e-10	-2.40807e-10	-3.19441e-10	-3.85639e-11	9.81601e-10	2.80424e-09	5.30576e-09	8.30453e-09	1.17753e-08
0.402863	-4.08158e-11	-1.87996e-11	-1.16599e-11	1.40195e-11	8.16113e-11	2.65351e-10	5.71713e-10	1.10205e-09	1.85822e-09	-1.51287e-10	-2.45382e-10	-3.14848e-10	-3.70661e-11	9.96834e-10	2.81026e-09	5.30278e-09	8.31664e-09	1.17768e-08
0.403113	-5.16188e-11	-2.34295e-11	-8.57335e-12	2.01926e-11	9.70441e-11	2.49919e-10	5.76343e-10	1.09279e-09	1.86593e-09	-1.55808e-10	-2.49976e-10	-3.13314e-10	-4.00799e-11	9.90806e-10	2.8058e-09	5.3089e-09	8.30912e-09	1.17829e-08
0.403363	-4.69889e-11	-2.6516e-11	-8.57335e-12	1.55628e-11	8.62411e-11	2.57635e-10	5.8406e-10	1.09742e-09	1.87828e-09	-1.49753e-10	-2.48487e-10	-3.16382e-10	-3.55774e-11	9.87729e-10	2.81941e-09	5.31496e-09	8.31517e-09	1.17692e-08
0.403613	-4.23591e-11	-2.03429e-11	-1.01166e-11	1.71061e-11	8.46978e-11	2.57635e-10	5.8406e-10	1.10514e-09	1.88291e-09	-1.52785e-10	-2.50057e-10	-3.20948e-10	-4.46278e-11	9.89217e-10	2.80427e-09	5.30286e-09	8.31367e-09	1.17798e-08
0.403863	-4.54456e-11	-3.42325e-11	-1.16599e-11	2.17359e-11	8.31545e-11	2.59178e-10	5.76343e-10	1.09897e-09	1.86747e-09	-1.55835e-10	-2.59181e-10	-3.164e-10	-3.25636e-11	9.86167e-10	2.81028e-09	5.31345e-09	8.31215e-09	1.17844e-08
0.404113	-4.54456e-11	-2.80593e-11	-1.01166e-11	1.86494e-11	8.16113e-11	2.56092e-10	5.76343e-10	1.09588e-09	1.87673e-09	-1.52812e-10	-2.53089e-10	-3.164e-10	-4.6162e-11	9.84633e-10	2.81035e-09	5.31201e-09	8.31515e-09	1.17692e-08
0.404363	-5.16188e-11	-2.80593e-11	-8.57335e-12	1.09329e-11	8.77844e-11	2.59178e-10	5.7943e-10	1.09897e-09	1.86902e-09	-1.54356e-10	-2.45446e-10	-3.20976e-10	-3.71025e-11	9.86158e-10	2.81486e-09	5.31508e-09	8.30763e-09	1.17814e-08
0.404613	-4.08158e-11	-2.34295e-11	-7.03006e-12	1.71061e-11	8.77844e-11	2.60721e-10	5.748e-10	1.08971e-09	1.85822e-09	-1.60456e-10	-2.48478e-10	-3.20985e-10	-3.85548e-11	9.87674e-10	2.80423e-09	5.31961e-09	8.32283e-09	1.1783e-08
0.404863	-5.47053e-11	-1.87996e-11	-1.01166e-11	1.55628e-11	8.93277e-11	2.54548e-10	5.77887e-10	1.10051e-09	1.85822e-09	-1.58967e-10	-2.53026e-10	-3.17944e-10	-3.55501e-11	9.84624e-10	2.80723e-09	5.30899e-09	8.32133e-09	1.17891e-08
0.405113	-3.61859e-11	-2.03429e-11	-1.47465e-11	2.32792e-11	8.77844e-11	2.53005e-10	5.85603e-10	1.10051e-09	1.86284e-09	-1.58949e-10	-2.45437e-10	-3.1946e-10	-4.16414e-11	9.83072e-10	2.8103e-09	5.31346e-09	8.31065e-09	1.17923e-08
0.405363	-4.69889e-11	-1.87996e-11	-5.48678e-12	1.40195e-11	8.77844e-11	2.54548e-10	5.87146e-10	1.10205e-09	1.86593e-09	-1.57415e-10	-2.46971e-10	-3.20985e-10	-4.3221e-11	9.81601e-10	2.81028e-09	5.3074e-09	8.31064e-09	1.18027e-08
0.405613	-4.69889e-11	-2.18862e-11	-1.16599e-11	9.38966e-12	8.93277e-11	2.56092e-10	5.76343e-10	1.09279e-09	1.87365e-09	-1.55863e-10	-2.56076e-10	-3.19478e-10	-4.61893e-11	9.92213e-10	2.80421e-09	5.30888e-09	8.31979e-09	1.17587e-08
0.405863	-4.54456e-11	-1.57131e-11	-5.48678e-12	1.40195e-11	8.16113e-11	2.59178e-10	5.8406e-10	1.10051e-09	1.86902e-09	-1.52858e-10	-2.46989e-10	-3.2093e-10	-3.09931e-11	9.83117e-10	2.8087e-09	5.30737e-09	8.31987e-09	1.17829e-08
0.406113	-3.92725e-11	-2.80593e-11	-8.57335e-12	2.32792e-11	8.16113e-11	2.59178e-10	5.82516e-10	1.1036e-09	1.87828e-09	-1.61908e-10	-2.48441e-10	-3.10355e-10	-3.70024e-11	9.8161e-10	2.80119e-09	5.30888e-09	8.32446e-09	1.17937e-08
0.406364	-5.31621e-11	-1.41698e-11	-1.16599e-11	2.48225e-11	8.31545e-11	2.60721e-10	5.8869e-10	1.09588e-09	1.87519e-09	-1.48264e-10	-2.454e-10	-3.25515e-10	-3.7057e-11	9.93765e-10	2.8148e-09	5.30739e-09	8.32754e-09	1.17953e-08
0.406614	-4.54456e-11	-2.18862e-11	-7.03006e-12	2.63658e-11	8.93277e-11	2.62265e-10	5.76343e-10	1.10668e-09	1.87365e-09	-1.52749e-10	-2.45446e-10	-3.2103e-10	-4.00708e-11	9.8772e-10	2.80422e-09	5.31195e-09	8.32755e-09	1.17923e-08
0.406864	-5.62486e-11	-2.34295e-11	-1.01166e-11	1.86494e-11	8.31545e-11	2.63808e-10	5.8406e-10	1.09742e-09	1.88754e-09	-1.5126e-10	-2.56058e-10	-3.20994e-10	-3.39886e-11	9.84615e-10	2.80575e-09	5.31046e-09	8.32602e-09	1.17937e-08
0.407114	-5.77919e-11	-1.87996e-11	-1.7833e-11	1.71061e-11	8.62411e-11	2.48375e-10	5.82516e-10	1.10051e-09	1.86593e-09	-1.52694e-10	-2.45446e-10	-3.19423e-10	-3.39613e-11	9.81574e-10	2.81792e-09	5.31198e-09	8.32602e-09	1.17861e-08
0.407364	-5.00755e-11	-2.6516e-11	-1.32032e-11	2.01926e-11	9.0871e-11	2.57635e-10	5.77887e-10	1.10051e-09	1.87056e-09	-1.39032e-10	-2.45391e-10	-3.1188e-10	-3.54955e-11	9.86122e-10	2.81035e-09	5.31348e-09	8.32758e-09	1.17907e-08
0.407614	-4.69889e-11	-2.49728e-11	-1.01166e-11	1.86494e-11	8.62411e-11	2.51462e-10	5.82516e-10	1.09897e-09	1.89062e-09	-1.48128e-10	-2.46944e-10	-3.27003e-10	-3.70388e-11	9.84688e-10	2.80729e-09	5.30752e-09	8.33215e-09	1.18029e-08
0.407864	-5.00755e-11	-1.57131e-11	-1.01166e-11	1.86494e-11	8.46978e-11	2.51462e-10	5.91776e-10	1.10051e-09	1.86747e-09	-1.5274e-10	-2.51446e-10	-3.1335e-10	-3.85912e-11	9.95254e-10	2.81331e-09	5.32863e-09	8.33064e-09	1.17938e-08
0.408114	-4.54456e-11	-3.11459e-11	-7.03006e-12	1.55628e-11	8.62411e-11	2.43745e-10	5.80973e-10	1.10514e-09	1.86747e-09	-1.49726e-10	-2.37829e-10	-3.10255e-10	-4.16323e-11	9.78596e-10	2.80266e-09	5.2953e-09	8.32912e-09	1.17923e-08
0.408364	-4.69889e-11	-2.80593e-11	-1.32032e-11	1.55628e-11	8.31545e-11	2.54548e-10	5.82516e-10	1.10668e-09	1.8721e-09	-1.51251e-10	-2.51428e-10	-3.16328e-10	-3.86003e-11	9.87656e-10	2.80109e-09	5.31036e-09	8.33069e-09	1.17953e-08
0.408614	-4.54456e-11	-2.49728e-11	-8.57335e-12	1.09329e-11	8.31545e-11	2.62265e-10	5.85603e-10	1.09588e-09	1.88136e-09	-1.54319e-10	-2.43921e-10	-3.14848e-10	-3.85821e-11	9.89217e-10	2.80416e-09	5.312e-09	8.33969e-09	1.17923e-08
0.408864	-4.69889e-11	-2.6516e-11	-1.32032e-11	2.01926e-11	8.46978e-11	2.54548e-10	5.80973e-10	1.10051e-09	1.88599e-09	-1.55799e-10	-2.49957e-10	-3.16437e-10	-3.85821e-11	9.86149e-10	2.80889e-09	5.31658e-09	8.31245e-09	1.17969e-08
0.409114	-4.23591e-11	-2.18862e-11	-1.01166e-11	1.40195e-11	8.77844e-11	2.53005e-10	5.68627e-10	1.10051e-09	1.88445e-09	-1.45205e-10	-2.46998e-10	-3.28556e-10	-3.86003e-11	9.81556e-10	2.83162e-09	5.31655e-09	8.33965e-09	1.18076e-08
0.409364	-4.39024e-11	-2.80593e-11	-1.16599e-11	2.01926e-11	8.62411e-11	2.56092e-10	5.7943e-10	1.10205e-09	1.88599e-09	-1.57315e-10	-2.56076e-10	-3.13405e-10	-4.16505e-11	9.81601e-10	2.80437e-09	5.30587e-09	8.32458e-09	1.18061e-08
0.409614	-5.00755e-11	-1.87996e-11	-1.01166e-11	1.55628e-11	9.24142e-11	2.53005e-10	5.76343e-10	1.10668e-09	1.89217e-09	-1.52767e-10	-2.46989e-10	-3.1788e-10	-4.16414e-11	9.93802e-10	2.81489e-09	5.30589e-09	8.32758e-09	1.18e-08
0.409864	-4.08158e-11	-3.11459e-11	-8.57335e-12	1.71061e-11	8.77844e-11	2.54548e-10	5.80973e-10	1.09897e-09	1.88136e-09	-1.45141e-10	-2.48441e-10	-3.16355e-10	-3.70661e-11	9.93838e-10	2.81646e-09	5.31963e-09	8.33369e-09	1.18046e-08
0.410115	-4.08158e-11	-2.96026e-11	-8.57335e-12	2.17359e-11	8.62411e-11	2.57635e-10	5.80973e-10	1.09588e-09	1.88291e-09	-1.49717e-10	-2.45409e-10	-3.11816e-10	-3.69842e-11	9.87729e-10	2.81193e-09	5.32276e-09	8.33376e-09	1.18107e-08
0.410365	-4.69889e-11	-1.72563e-11	-1.01166e-11	1.40195e-11	8.77844e-11	2.56092e-10	5.80973e-10	1.09588e-09	1.89062e-09	-1.57333e-10	-2.4688e-10	-3.19432e-10	-2.78883e-11	9.86204e-10	2.81798e-09	5.3212e-09	8.33827e-09	1.18077e-08
0.410615	-5.16188e-11	-2.6516e-11	-1.62898e-11	1.71061e-11	8.62411e-11	2.59178e-10	5.80973e-10	1.10668e-09	1.88445e-09	-1.51305e-10	-2.40807e-10	-3.22473e-10	-3.6966e-11	9.92277e-10	2.81497e-09	5.31207e-09	8.32769e-09	1.18046e-08
0.410865	-5.16188e-11	-2.34295e-11	-1.47465e-11	1.71061e-11	8.77844e-11	2.51462e-10	5.8406e-10	1.11131e-09	1.88599e-09	-1.55826e-10	-2.43839e-10	-3.13387e-10	-3.4025e-11	9.89254e-10	2.81499e-09	5.31805e-09	8.3383e-09	1.18076e-08
0.411115	-4.39024e-11	-2.18862e-11	-1.01166e-11	1.55628e-11	9.24142e-11	2.51462e-10	5.80973e-10	1.10514e-09	1.88754e-09	-1.5284e-10	-2.46907e-10	-3.20967e-10	-4.3121e-11	9.87729e-10	2.82104e-09	5.30746e-09	8.33832e-09	1.18031e-08
0.411365	-4.39024e-11	-3.42325e-11	-1.16599e-11	1.55628e-11	9.24142e-11	2.48375e-10	5.85603e-10	1.10977e-09	1.88136e-09	-1.58931e-10	-2.46934e-10	-3.22464e-10	-3.7057e-11	9.90733e-10	2.81349e-09	5.31506e-09	8.33225e-09	1.18122e-08
0.411615	-5.16188e-11	-1.87996e-11	-1.01166e-11	1.86494e-11	8.93277e-11	2.56092e-10	5.85603e-10	1.09588e-09	1.88136e-09	-1.60501e-10	-2.4845e-10	-3.10309e-10	-3.40068e-11	9.84742e-10	2.81952e-09	5.32125e-09	8.33678e-09	1.18076e-08
0.411865	-4.39024e-11	-2.03429e-11	-1.32032e-11	1.86494e-11	8.93277e-11	2.56092e-10	5.80973e-10	1.11131e-09	1.87519e-09	-1.61972e-10	-2.46916e-10	-3.16309e-10	-4.01072e-11	9.99838e-10	2.81499e-09	5.32877e-09	8.33533e-09	1.18e-08
0.412115	-4.54456e-11	-2.49728e-11	-7.03006e-12	2.63658e-11	8.62411e-11	2.60721e-10	5.87146e-10	1.1036e-09	1.87673e-09	-1.51296e-10	-2.4383e-10	-3.11807e-10	-4.31573e-11	9.80149e-10	2.818e-09	5.3045e-09	8.34283e-09	1.18091e-08
0.412365	-4.69889e-11	-3.57757e-11	-7.03006e-12	1.71061e-11	8.93277e-11	2.60721e-10	5.82516e-10	1.10823e-09	1.86593e-09	-1.49689e-10	-2.39309e-10	-3.17889e-10	-3.71116e-11	9.8761e-10	2.81495e-09	5.31963e-09	8.32314e-09	1.18077e-08
0.412615	-4.85322e-11	-2.80593e-11	-1.01166e-11	1.86494e-11	9.0871e-11	2.49919e-10	5.8406e-10	1.10051e-09	1.87365e-09	-1.46612e-10	-2.51473e-10	-3.19378e-10	-4.31846e-11	9.80076e-10	2.81185e-09	5.32278e-09	8.33828e-09	1.18199e-08
0.412865	-4.54456e-11	-2.80593e-11	-8.57335e-12	1.40195e-11	8.46978e-11	2.53005e-10	5.80973e-10	1.10977e-09	1.85976e-09	-1.43534e-10	-2.49921e-10	-3.07241e-10	-4.47097e-11	9.87665e-10	2.80727e-09	5.3243e-09	8.3399e-09	1.18215e-08
0.413115	-3.77292e-11	-2.03429e-11	-1.47465e-11	2.32792e-11	8.62411e-11	2.57635e-10	5.76343e-10	1.10823e-09	1.87519e-09	-1.42028e-10	-2.33327e-10	-3.16328e-10	-3.86367e-11	9.8929e-10	2.8088e-09	5.32126e-09	8.34147e-09	1.18124e-08
0.413365	-3.77292e-11	-2.49728e-11	-1.47465e-11	2.01926e-11	8.46978e-11	2.42202e-10	5.748e-10	1.10514e-09	1.87982e-09	-1.48146e-10	-2.65145e-10	-3.17898e-10	-4.1605e-11	9.98422e-10	2.81491e-09	5.32126e-09	8.34602e-09	1.18214e-08
0.413616	-3.61859e-11	-1.41698e-11	-7.03006e-12	2.17359e-11	9.0871e-11	2.43745e-10	5.7943e-10	1.12212e-09	1.87056e-09	-1.52749e-10	-2.4698e-10	-3.16382e-10	-3.39977e-11	9.93911e-10	2.81492e-09	5.32428e-09	8.3415e-09	1.18094e-08
0.413866	-5.47053e-11	-2.18862e-11	-8.57335e-12	1.55628e-11	8.46978e-11	2.56092e-10	5.77887e-10	1.1036e-09	1.87056e-09	-1.5126e-10	-2.37811e-10	-3.16419e-10	-3.40068e-11	9.95391e-10	2.81034e-09	5.31973e-09	8.346e-09	1.18276e-08
0.414116	-4.08158e-11	-2.34295e-11	-2.40021e-12	1.09329e-11	8.62411e-11	2.46832e-10	5.96406e-10	1.10514e-09	1.87673e-09	-1.52867e-10	-2.53008e-10	-3.24026e-10	-4.30482e-11	9.92313e-10	2.80881e-09	5.32129e-09	8.33849e-09	1.18292e-08
0.414366	-3.77292e-11	-2.34295e-11	-3.9435e-12	1.40195e-11	8.46978e-11	2.57635e-10	5.77887e-10	1.1036e-09	1.86902e-09	-1.68054e-10	-2.53071e-10	-3.20967e-10	-2.48927e-11	9.86231e-10	2.81338e-09	5.33042e-09	8.35213e-09	1.18139e-08
0.414616	-4.85322e-11	-2.49728e-11	-1.32032e-11	1.55628e-11	8.62411e-11	2.54548e-10	5.82516e-10	1.11131e-09	1.87982e-09	-1.55954e-10	-2.48496e-10	-3.11834e-10	-3.9998e-11	9.92213e-10	2.81343e-09	5.32589e-09	8.34608e-09	1.18154e-08
0.414866	-4.08158e-11	-2.18862e-11	-1.01166e-11	2.17359e-11	8.31545e-11	2.40659e-10	5.8406e-10	1.1036e-09	1.88291e-09	-1.57379e-10	-2.48496e-10	-3.17853e-10	-3.40159e-11	9.78615e-10	2.81794e-09	5.32436e-09	8.34001e-09	1.18276e-08
0.415116	-3.92725e-11	-2.49728e-11	-1.16599e-11	2.01926e-11	9.55008e-11	2.59178e-10	5.748e-10	1.10514e-09	1.86747e-09	-1.52794e-10	-2.5308e-10	-3.1335e-10	-3.85548e-11	9.93729e-10	2.80736e-09	5.32892e-09	8.35217e-09	1.18155e-08
0.415366	-5.31621e-11	-3.26892e-11	-5.48678e-12	1.86494e-11	8.31545e-11	2.54548e-10	5.7943e-10	1.10514e-09	1.88136e-09	-1.49689e-10	-2.54642e-10	-3.19369e-10	-3.86003e-11	9.84706e-10	2.81792e-09	5.32743e-09	8.35072e-09	1.18215e-08
0.415616	-4.85322e-11	-2.49728e-11	-7.03006e-12	1.40195e-11	8.46978e-11	2.51462e-10	5.8406e-10	1.10977e-09	1.86747e-09	-1.45123e-10	-2.5613e-10	-3.10291e-10	-4.16141e-11	9.90724e-10	2.80888e-09	5.32894e-09	8.35228e-09	1.18216e-08
0.415866	-4.54456e-11	-2.34295e-11	-7.03006e-12	1.86494e-11	8.46978e-11	2.53005e-10	5.7943e-10	1.10823e-09	1.88445e-09	-1.49644e-10	-2.48478e-10	-3.16309e-10	-3.55319e-11	9.86185e-10	2.81638e-09	5.32744e-09	8.35836e-09	1.18353e-08
0.416116	-4.85322e-11	-2.80593e-11	-7.03006e-12	1.55628e-11	9.0871e-11	2.49919e-10	5.85603e-10	1.10823e-09	1.87828e-09	-1.45132e-10	-2.42368e-10	-3.1178e-10	-3.55228e-11	9.86204e-10	2.80584e-09	5.33045e-09	8.35381e-09	1.18324e-08
0.416366	-3.92725e-11	-2.6516e-11	-1.16599e-11	1.40195e-11	8.77844e-11	2.62265e-10	5.85603e-10	1.10514e-09	1.88291e-09	-1.51251e-10	-2.48423e-10	-3.13277e-10	-4.0089e-11	9.93793e-10	2.81948e-09	5.32441e-09	8.35227e-09	1.18324e-08
0.416616	-4.54456e-11	-1.57131e-11	-7.03006e-12	1.09329e-11	8.62411e-11	2.57635e-10	5.7943e-10	1.10977e-09	1.87365e-09	-1.58895e-10	-2.46916e-10	-3.1325e-10	-3.86094e-11	9.87701e-10	2.81644e-09	5.33192e-09	8.35384e-09	1.18323e-08
0.416866	-4.69889e-11	-2.80593e-11	-7.03006e-12	1.86494e-11	8.46978e-11	2.53005e-10	5.77887e-10	1.10668e-09	1.87673e-09	-1.55872e-10	-2.43902e-10	-3.07241e-10	-4.16687e-11	9.81601e-10	2.8043e-09	5.31825e-09	8.36298e-09	1.18278e-08
0.417117	-4.69889e-11	-2.80593e-11	-1.62898e-11	1.40195e-11	9.39575e-11	2.53005e-10	5.76343e-10	1.10514e-09	1.88754e-09	-1.52821e-10	-2.51528e-10	-3.22382e-10	-4.46824e-11	9.87674e-10	2.81794e-09	5.32132e-09	8.35992e-09	1.18323e-08
0.417367	-4.54456e-11	-3.11459e-11	-1.93763e-11	1.71061e-11	7.85247e-11	2.51462e-10	5.76343e-10	1.11131e-09	1.87828e-09	-1.55872e-10	-2.5456e-10	-3.10282e-10	-3.55592e-11	9.89272e-10	2.81497e-09	5.33803e-09	8.34924e-09	1.18308e-08
0.417617	-3.92725e-11	-2.49728e-11	-8.57335e-12	2.94523e-11	8.46978e-11	2.65351e-10	5.80973e-10	1.11749e-09	1.87673e-09	-1.58867e-10	-2.43821e-10	-3.11689e-10	-3.7057e-11	9.95336e-10	2.81494e-09	5.32292e-09	8.35076e-09	1.18278e-08
0.417867	-3.92725e-11	-2.49728e-11	-1.47465e-11	2.01926e-11	9.39575e-11	2.54548e-10	5.77887e-10	1.10051e-09	1.88445e-09	-1.46739e-10	-2.30113e-10	-3.04109e-10	-4.16414e-11	9.87774e-10	2.81344e-09	5.33046e-09	8.36142e-09	1.18338e-08
0.418117	-4.39024e-11	-3.57757e-11	-1.32032e-11	1.71061e-11	8.62411e-11	2.46832e-10	5.7943e-10	1.11286e-09	1.87519e-09	-1.55844e-10	-2.43793e-10	-3.10173e-10	-4.16414e-11	9.92286e-10	2.81797e-09	5.33054e-09	8.35695e-09	1.18293e-08
0.418367	-4.54456e-11	-2.6516e-11	-8.57335e-12	2.94523e-11	9.0871e-11	2.59178e-10	5.82516e-10	1.10823e-09	1.87365e-09	-1.6042e-10	-2.49985e-10	-3.11743e-10	-3.7057e-11	9.89245e-10	2.81191e-09	5.33655e-09	8.36448e-09	1.18294e-08
0.418617	-4.69889e-11	-2.6516e-11	-2.40021e-12	1.55628e-11	8.31545e-11	2.53005e-10	5.7943e-10	1.1144e-09	1.87828e-09	-1.51369e-10	-2.51482e-10	-3.13277e-10	-3.55319e-11	9.86231e-10	2.81336e-09	5.32141e-09	8.35244e-09	1.18535e-08
0.418867	-5.00755e-11	-2.03429e-11	-1.47465e-11	1.09329e-11	8.31545e-11	2.54548e-10	5.80973e-10	1.10823e-09	1.87365e-09	-1.63406e-10	-2.40861e-10	-3.1325e-10	-4.01072e-11	9.95336e-10	2.8073e-09	5.33506e-09	8.37209e-09	1.18065e-08
0.419117	-4.69889e-11	-2.6516e-11	-1.01166e-11	1.24762e-11	8.62411e-11	2.60721e-10	5.7943e-10	1.1144e-09	1.88445e-09	-1.45151e-10	-2.48359e-10	-3.07204e-10	-4.16778e-11	9.90815e-10	2.81184e-09	5.33666e-09	8.35386e-09	1.18306e-08
0.419367	-5.00755e-11	-2.80593e-11	-1.16599e-11	1.86494e-11	9.24142e-11	2.51462e-10	5.85603e-10	1.10977e-09	1.8968e-09	-1.40521e-10	-2.37757e-10	-3.16346e-10	-4.46824e-11	9.90788e-10	2.81341e-09	5.33511e-09	8.34613e-09	1.18171e-08
0.419617	-4.69889e-11	-2.96026e-11	-1.01166e-11	1.86494e-11	8.93277e-11	2.53005e-10	5.7943e-10	1.1144e-09	1.88754e-09	-1.49653e-10	-2.42268e-10	-3.20912e-10	-3.55683e-11	9.90788e-10	2.81652e-09	5.33055e-09	8.34766e-09	1.18354e-08
0.419867	-4.85322e-11	-2.49728e-11	-1.16599e-11	1.40195e-11	9.24142e-11	2.57635e-10	5.73257e-10	1.10668e-09	1.88599e-09	-1.5126e-10	-2.42323e-10	-3.10291e-10	-3.85821e-11	9.90752e-10	2.82413e-09	5.33363e-09	8.35537e-09	1.18476e-08
0.420117	-4.08158e-11	-2.6516e-11	-2.40021e-12	1.71061e-11	8.46978e-11	2.59178e-10	5.8406e-10	1.10977e-09	1.88754e-09	-1.55853e-10	-2.4688e-10	-3.14857e-10	-4.15868e-11	9.84688e-10	2.81805e-09	5.34426e-09	8.36914e-09	1.18279e-08
0.420367	-4.23591e-11	-3.42325e-11	-1.32032e-11	2.17359e-11	9.0871e-11	2.65351e-10	5.80973e-10	1.10823e-09	1.88136e-09	-1.57369e-10	-2.43802e-10	-3.23944e-10	-3.10022e-11	9.90779e-10	2.81503e-09	5.33362e-09	8.36918e-09	1.184e-08
0.420617	-5.00755e-11	-2.34295e-11	-1.32032e-11	1.40195e-11	8.46978e-11	2.56092e-10	5.80973e-10	1.11131e-09	1.88291e-09	-1.51224e-10	-2.34679e-10	-3.08784e-10	-4.30846e-11	9.95336e-10	2.82562e-09	5.32901e-09	8.36156e-09	1.18355e-08
0.420868	-4.23591e-11	-2.96026e-11	-1.01166e-11	1.40195e-11	8.31545e-11	2.62265e-10	5.80973e-10	1.11594e-09	1.88291e-09	-1.42091e-10	-2.4225e-10	-3.14784e-10	-3.40523e-11	9.86213e-10	2.8135e-09	5.33364e-09	8.36306e-09	1.18385e-08
0.421118	-4.08158e-11	-2.6516e-11	-1.01166e-11	1.24762e-11	9.39575e-11	2.49919e-10	5.82516e-10	1.10668e-09	1.87365e-09	-1.51224e-10	-2.42277e-10	-3.13332e-10	-4.16141e-11	9.86185e-10	2.81647e-09	5.34722e-09	8.36614e-09	1.1834e-08
0.421368	-3.92725e-11	-1.72563e-11	-1.16599e-11	1.71061e-11	8.16113e-11	2.54548e-10	5.73257e-10	1.11903e-09	1.88754e-09	-1.57342e-10	-2.39273e-10	-3.1936e-10	-4.0089e-11	9.90742e-10	2.81499e-09	5.31838e-09	8.36924e-09	1.18415e-08
0.421618	-4.54456e-11	-2.80593e-11	-1.47465e-11	1.86494e-11	9.70441e-11	2.46832e-10	5.76343e-10	1.11131e-09	1.88599e-09	-1.51296e-10	-2.46853e-10	-3.08775e-10	-3.2509e-11	9.8772e-10	2.81952e-09	5.32735e-09	8.37395e-09	1.1831e-08
0.421868	-5.00755e-11	-2.18862e-11	-1.7833e-11	2.17359e-11	8.93277e-11	2.54548e-10	5.77887e-10	1.10977e-09	1.88291e-09	-1.54256e-10	-2.42332e-10	-3.17916e-10	-4.16323e-11	9.8772e-10	2.81344e-09	5.32595e-09	8.39354e-09	1.18446e-08
0.422118	-3.77292e-11	-2.18862e-11	-3.9435e-12	2.17359e-11	9.24142e-11	2.54548e-10	5.7017e-10	1.09279e-09	1.88445e-09	-1.4516e-10	-2.43839e-10	-3.27021e-10	-4.46915e-11	9.90724e-10	2.81351e-09	5.33808e-09	8.34956e-09	1.18432e-08
0.422368	-4.54456e-11	-2.34295e-11	-1.16599e-11	1.86494e-11	8.77844e-11	2.51462e-10	5.80973e-10	1.10977e-09	1.88445e-09	-1.51178e-10	-2.45382e-10	-3.10327e-10	-3.71207e-11	9.83154e-10	2.83165e-09	5.32751e-09	8.37217e-09	1.18431e-08
0.422618	-4.54456e-11	-2.80593e-11	-1.16599e-11	1.86494e-11	9.39575e-11	2.45289e-10	5.82516e-10	1.10977e-09	1.88908e-09	-1.46676e-10	-2.46916e-10	-3.14848e-10	-4.31482e-11	9.89226e-10	2.80442e-09	5.33203e-09	8.37076e-09	1.18416e-08
0.422868	-4.85322e-11	-3.11459e-11	-8.5693e-13	1.24762e-11	8.93277e-11	2.57635e-10	5.7943e-10	1.1036e-09	1.87982e-09	-1.52767e-10	-2.46871e-10	-3.22446e-10	-3.86094e-11	9.92359e-10	2.82251e-09	5.33356e-09	8.36779e-09	1.1837e-08
0.423118	-4.85322e-11	-2.80593e-11	-8.57335e-12	9.38966e-12	8.16113e-11	2.54548e-10	5.8406e-10	1.12057e-09	1.88599e-09	-1.55826e-10	-2.37775e-10	-3.13368e-10	-3.86185e-11	9.99929e-10	2.81499e-09	5.33052e-09	8.38297e-09	1.18432e-08
0.423368	-3.77292e-11	-3.11459e-11	-1.16599e-11	2.17359e-11	9.0871e-11	2.49919e-10	5.80973e-10	1.10514e-09	1.88445e-09	-1.51333e-10	-2.46898e-10	-3.1788e-10	-4.46915e-11	9.87793e-10	2.81348e-09	5.33051e-09	8.37392e-09	1.18508e-08
0.423618	-4.69889e-11	-2.18862e-11	-1.32032e-11	1.24762e-11	8.62411e-11	2.60721e-10	5.82516e-10	1.10977e-09	1.88908e-09	-1.61954e-10	-2.51492e-10	-3.164e-10	-4.01709e-11	9.9077e-10	2.82411e-09	5.33203e-09	8.3754e-09	1.18447e-08
0.423868	-4.39024e-11	-2.49728e-11	-1.47465e-11	7.84638e-12	8.46978e-11	2.62265e-10	5.748e-10	1.10205e-09	1.88445e-09	-1.57424e-10	-2.45409e-10	-3.19441e-10	-4.31664e-11	9.90752e-10	2.81809e-09	5.33054e-09	8.37693e-09	1.18417e-08
0.424118	-4.08158e-11	-2.96026e-11	-1.32032e-11	7.84638e-12	9.24142e-11	2.53005e-10	5.8406e-10	1.10514e-09	1.90143e-09	-1.54319e-10	-2.43893e-10	-3.19423e-10	-3.86367e-11	9.84715e-10	2.82111e-09	5.33508e-09	8.37692e-09	1.18508e-08
0.424369	-4.39024e-11	-2.6516e-11	-8.57335e-12	1.24762e-11	8.31545e-11	2.66895e-10	5.77887e-10	1.10823e-09	1.87828e-09	-1.49799e-10	-2.51482e-10	-3.13277e-10	-4.31937e-11	9.95327e-10	2.82266e-09	5.33055e-09	8.37389e-09	1.18493e-08
0.424619	-4.39024e-11	-2.80593e-11	-1.47465e-11	1.24762e-11	8.31545e-11	2.59178e-10	5.7943e-10	1.10514e-09	1.87982e-09	-1.61963e-10	-2.46916e-10	-3.05634e-10	-4.47188e-11	9.90852e-10	2.82264e-09	5.33355e-09	8.37697e-09	1.18432e-08
0.424869	-5.16188e-11	-2.80593e-11	-1.16599e-11	1.55628e-11	8.31545e-11	2.60721e-10	5.82516e-10	1.11286e-09	1.88908e-09	-1.60483e-10	-2.40834e-10	-3.08739e-10	-4.00708e-11	9.97016e-10	2.81805e-09	5.33054e-09	8.38456e-09	1.18494e-08
0.425119	-4.54456e-11	-1.87996e-11	-1.47465e-11	1.40195e-11	7.69814e-11	2.53005e-10	5.8406e-10	1.09897e-09	1.89062e-09	-1.55872e-10	-2.48432e-10	-3.25551e-10	-2.63814e-11	1.01208e-09	2.8165e-09	5.33353e-09	8.37547e-09	1.18615e-08
0.425369	-4.39024e-11	-2.6516e-11	-5.48678e-12	9.38966e-12	8.31545e-11	2.59178e-10	5.87146e-10	1.10668e-09	1.88754e-09	-1.51324e-10	-2.50003e-10	-3.28601e-10	-3.6966e-11	9.7413e-10	2.81649e-09	5.32749e-09	8.3785e-09	1.18495e-08
0.425619	-4.69889e-11	-2.80593e-11	-7.03006e-12	1.55628e-11	8.93277e-11	2.59178e-10	5.7943e-10	1.10977e-09	1.88445e-09	-1.6042e-10	-2.50012e-10	-3.11852e-10	-3.55228e-11	9.89217e-10	2.81654e-09	5.33358e-09	8.38306e-09	1.18585e-08
0.425869	-4.23591e-11	-2.6516e-11	-1.32032e-11	2.32792e-11	9.39575e-11	2.54548e-10	5.82516e-10	1.12057e-09	1.88754e-09	-1.55899e-10	-2.50067e-10	-3.13259e-10	-3.85275e-11	9.99948e-10	2.82412e-09	5.33816e-09	8.37853e-09	1.18479e-08
0.426119	-5.16188e-11	-2.18862e-11	-1.32032e-11	1.09329e-11	8.0068e-11	2.57635e-10	5.7943e-10	1.1036e-09	1.88136e-09	-1.55872e-10	-2.59071e-10	-3.10255e-10	-3.24181e-11	9.93902e-10	2.81654e-09	5.33363e-09	8.38156e-09	1.18478e-08
0.426369	-4.39024e-11	-1.87996e-11	-5.48678e-12	1.71061e-11	8.0068e-11	2.59178e-10	5.80973e-10	1.10205e-09	1.8721e-09	-1.55863e-10	-2.3487e-10	-3.16328e-10	-2.78246e-11	9.9235e-10	2.81648e-09	5.33663e-09	8.38303e-09	1.18539e-08
0.426619	-5.31621e-11	-2.03429e-11	-1.32032e-11	1.86494e-11	8.93277e-11	2.65351e-10	5.73257e-10	1.10977e-09	1.88136e-09	-1.54337e-10	-2.5909e-10	-3.14821e-10	-3.08839e-11	9.93865e-10	2.81499e-09	5.33209e-09	8.37097e-09	1.18571e-08
0.426869	-3.77292e-11	-2.49728e-11	-1.01166e-11	2.48225e-11	8.62411e-11	2.56092e-10	5.8406e-10	1.11286e-09	1.89834e-09	-1.54347e-10	-2.53098e-10	-3.11771e-10	-3.70297e-11	9.93829e-10	2.81958e-09	5.33511e-09	8.39216e-09	1.18617e-08
0.427119	-5.00755e-11	-2.34295e-11	-8.57335e-12	7.84638e-12	8.46978e-11	2.57635e-10	5.85603e-10	1.11594e-09	1.89062e-09	-1.5736e-10	-2.46944e-10	-3.13296e-10	-4.16323e-11	9.86222e-10	2.82417e-09	5.33515e-09	8.37704e-09	1.18632e-08
0.427369	-4.39024e-11	-2.03429e-11	-1.01166e-11	9.38966e-12	8.46978e-11	2.59178e-10	5.77887e-10	1.10977e-09	1.89217e-09	-1.51315e-10	-2.43875e-10	-3.16373e-10	-4.01072e-11	9.89236e-10	2.82269e-09	5.33817e-09	8.37848e-09	1.18632e-08
0.427619	-5.93352e-11	-1.57131e-11	-1.01166e-11	2.17359e-11	8.16113e-11	2.60721e-10	5.8406e-10	1.10823e-09	1.88908e-09	-1.57397e-10	-2.46944e-10	-3.19378e-10	-3.55774e-11	9.90815e-10	2.82572e-09	5.33363e-09	8.37852e-09	1.18571e-08
0.42787	-4.69889e-11	-2.96026e-11	2.22964e-12	2.01926e-11	8.62411e-11	2.71524e-10	5.82516e-10	1.10977e-09	1.88908e-09	-1.60438e-10	-2.53017e-10	-3.08784e-10	-4.47006e-11	9.96879e-10	2.82415e-09	5.33659e-09	8.38463e-09	1.18616e-08
0.42812	-4.39024e-11	-2.96026e-11	-1.16599e-11	1.71061e-11	8.62411e-11	2.48375e-10	5.77887e-10	1.11131e-09	1.88291e-09	-1.52849e-10	-2.45509e-10	-3.1936e-10	-4.47279e-11	9.89354e-10	2.81351e-09	5.32601e-09	8.3862e-09	1.18541e-08
0.42837	-5.00755e-11	-3.11459e-11	-1.16599e-11	1.40195e-11	9.24142e-11	2.56092e-10	5.80973e-10	1.11749e-09	1.88291e-09	-1.55817e-10	-2.59135e-10	-3.13332e-10	-4.01072e-11	9.99911e-10	2.81957e-09	5.33815e-09	8.3877e-09	1.18677e-08
[truncated: 689 more rows]

## Sheet: Fig. 3B
Values are current densites (in pA/pF) for indicated conditions, in individual cells. T6, TMEM206. n.t., not transfected. Experiments were performed in WT HEK293 cells.
[truncated: 14 more rows]

## Sheet: Fig. 3C
Values are currents in Ampere in response to rectangular pulses to the indicated voltages.
[truncated: 2,403 more rows]

[truncated: 5 more sheets: Fig. 3D, Fig. 3E, Fig. 3F, Fig. 3G, Fig. 3H]
