# Supplementary material for: Identification of TMEM206 proteins as pore of PAORAC/ASOR acid-sensitive chloride channels
Source: eLife. 2019 Jul 18;8:e49187. doi: 10.7554/eLife.49187 (PMC6663466; doi:10.7554/eLife.49187)
Supplement: Figure 4—source data 1. [file elife-49187-fig4-data1.xlsx]

## Sheet: Fig. 4A
Currents (in nA) as a function of voltage with the indicated extracellular anion in a representative cell
Voltage (mV)	Cl	I	NO3	Br	SCN
-80.07	-0.41823	-0.26853	-0.43212	-0.33026	-0.41206
-79.69	-0.40434	-0.25619	-0.43675	-0.33026	-0.392
-79.44	-0.42132	-0.25619	-0.43984	-0.32409	-0.39817
-79.13	-0.42903	-0.2639	-0.43984	-0.33181	-0.41051
-78.81	-0.43058	-0.24538	-0.45373	-0.31174	-0.41051
-78.5	-0.42903	-0.25619	-0.43984	-0.32718	-0.38582
-78.19	-0.43058	-0.26545	-0.43984	-0.32872	-0.41051
-77.78	-0.43521	-0.26236	-0.44755	-0.32718	-0.39817
-77.5	-0.43829	-0.26853	-0.45373	-0.33026	-0.40125
-77.28	-0.45218	-0.26082	-0.45064	-0.31792	-0.39508
-76.9	-0.45218	-0.25619	-0.45836	-0.33026	-0.40588
-76.59	-0.43984	-0.26699	-0.45836	-0.33489	-0.39045
-76.25	-0.44138	-0.27007	-0.45527	-0.34261	-0.39508
-75.87	-0.45373	-0.26082	-0.46144	-0.33335	-0.39354
-75.59	-0.46761	-0.25464	-0.47224	-0.33952	-0.39508
-75.25	-0.45218	-0.26699	-0.46762	-0.33644	-0.40125
-74.96	-0.45681	-0.27625	-0.45681	-0.33181	-0.38119
-74.59	-0.4599	-0.27625	-0.43521	-0.33952	-0.39662
-74.28	-0.46299	-0.27162	-0.42132	-0.33952	-0.36885
-73.93	-0.47687	-0.28242	-0.4491	-0.35804	-0.38891
-73.62	-0.48305	-0.27779	-0.43521	-0.33798	-0.38582
-73.27	-0.47688	-0.2747	-0.43212	-0.33798	-0.40434
-73.02	-0.48459	-0.26545	-0.43984	-0.33644	-0.40588
-72.71	-0.49231	-0.27779	-0.46761	-0.34878	-0.40434
-72.3	-0.49539	-0.27316	-0.45064	-0.35187	-0.40588
-72.05	-0.50002	-0.28551	-0.44601	-0.35959	-0.39199
-71.71	-0.50311	-0.27933	-0.47533	-0.35959	-0.39199
-71.36	-0.49848	-0.27934	-0.47842	-0.3457	-0.40434
-71.02	-0.5062	-0.29168	-0.46607	-0.33644	-0.39354
-70.77	-0.51854	-0.28859	-0.47379	-0.35033	-0.40125
-70.43	-0.51546	-0.28551	-0.4815	-0.36113	-0.39199
-70.14	-0.53089	-0.28088	-0.48613	-0.34415	-0.39199
-69.83	-0.51854	-0.27316	-0.48459	-0.35804	-0.39662
-69.46	-0.51237	-0.27779	-0.49076	-0.36113	-0.39817
-69.17	-0.53089	-0.27471	-0.49076	-0.35959	-0.40434
-68.86	-0.53706	-0.27779	-0.49385	-0.3457	-0.39971
-68.49	-0.55404	-0.27625	-0.45527	-0.35341	-0.38274
-68.17	-0.5278	-0.27471	-0.48922	-0.36267	-0.38891
-67.83	-0.51854	-0.28396	-0.47533	-0.37193	-0.38736
-67.48	-0.53552	-0.28396	-0.49231	-0.35804	-0.38582
-67.17	-0.54015	-0.28705	-0.49385	-0.35341	-0.38428
-66.83	-0.54632	-0.27625	-0.49694	-0.36422	-0.37811
-66.54	-0.53552	-0.28396	-0.48614	-0.37656	-0.39354
-66.29	-0.56021	-0.28396	-0.48459	-0.3781	-0.39199
-65.89	-0.5741	-0.29322	-0.51083	-0.37656	-0.39199
-65.48	-0.57565	-0.28705	-0.51237	-0.36885	-0.39045
-65.26	-0.58645	-0.28859	-0.51391	-0.36267	-0.39045
-64.95	-0.59262	-0.27934	-0.52472	-0.38736	-0.38428
-64.64	-0.58799	-0.28242	-0.52163	-0.37039	-0.37965
-64.29	-0.59571	-0.29014	-0.53861	-0.38428	-0.39354
-63.98	-0.60342	-0.29168	-0.52472	-0.38736	-0.38736
-63.66	-0.59571	-0.29168	-0.53243	-0.37039	-0.39354
-63.32	-0.60497	-0.29477	-0.54015	-0.38273	-0.4028
-63.07	-0.61731	-0.28705	-0.53089	-0.39199	-0.39199
-62.66	-0.62657	-0.28705	-0.52472	-0.39354	-0.39662
-62.38	-0.63583	-0.28396	-0.51546	-0.38274	-0.38736
-62.1	-0.63275	-0.28242	-0.50774	-0.38736	-0.37811
-61.76	-0.63583	-0.28705	-0.50928	-0.39354	-0.38582
-61.41	-0.64818	-0.29477	-0.50157	-0.38428	-0.37656
-61.13	-0.64201	-0.29322	-0.50465	-0.40125	-0.37965
-60.79	-0.64355	-0.29014	-0.51854	-0.39508	-0.38273
-60.44	-0.65435	-0.28242	-0.53243	-0.39354	-0.38891
-60.16	-0.66361	-0.28859	-0.53706	-0.39817	-0.38737
-59.85	-0.66361	-0.29477	-0.54324	-0.40743	-0.40434
-59.47	-0.66361	-0.29631	-0.54787	-0.39817	-0.38274
-59.16	-0.66361	-0.30557	-0.54015	-0.40897	-0.38582
-58.81	-0.66824	-0.3102	-0.54169	-0.41051	-0.38273
-58.53	-0.68213	-0.30711	-0.54015	-0.40897	-0.37348
-58.22	-0.68368	-0.3102	-0.54169	-0.41051	-0.36267
-57.84	-0.69448	-0.30403	-0.5525	-0.40743	-0.37039
-57.62	-0.68831	-0.30557	-0.56484	-0.42132	-0.37039
-57.22	-0.70528	-0.29785	-0.5525	-0.42595	-0.36422
-56.94	-0.70837	-0.29785	-0.56021	-0.42132	-0.36267
-56.59	-0.71763	-0.30557	-0.55867	-0.41823	-0.36422
-56.28	-0.72843	-0.30403	-0.56639	-0.42595	-0.37965
-55.97	-0.71763	-0.30711	-0.5741	-0.40589	-0.38273
-55.68	-0.72689	-0.29322	-0.57719	-0.43058	-0.38119
-55.28	-0.72534	-0.30403	-0.56793	-0.43058	-0.37039
-55.03	-0.72071	-0.30403	-0.56021	-0.42903	-0.3781
-54.65	-0.72689	-0.30248	-0.5633	-0.43366	-0.37502
-54.34	-0.7346	-0.29631	-0.56793	-0.42595	-0.37348
-54.09	-0.7346	-0.29785	-0.57256	-0.44138	-0.37348
-53.71	-0.72997	-0.3102	-0.55867	-0.44447	-0.37656
-53.4	-0.75467	-0.30248	-0.55867	-0.43521	-0.37811
-53.02	-0.7701	-0.30711	-0.57564	-0.43675	-0.38736
-52.68	-0.77473	-0.30711	-0.5633	-0.43212	-0.3673
-52.46	-0.78707	-0.31483	-0.58645	-0.43829	-0.36267
-51.99	-0.78399	-0.32872	-0.57873	-0.43212	-0.36422
-51.71	-0.77473	-0.32563	-0.57256	-0.42595	-0.36113
-51.49	-0.78399	-0.31946	-0.58799	-0.45373	-0.34415
-51.08	-0.77782	-0.31637	-0.56176	-0.46607	-0.35958
-50.74	-0.7701	-0.29631	-0.59108	-0.4491	-0.34107
-50.46	-0.78708	-0.29785	-0.60497	-0.45064	-0.33026
-50.14	-0.80405	-0.2994	-0.60342	-0.46299	-0.34724
-49.86	-0.80251	-0.30248	-0.60034	-0.45836	-0.34415
-49.45	-0.79016	-0.30248	-0.59879	-0.43366	-0.34415
-49.24	-0.81177	-0.3102	-0.58028	-0.46761	-0.33644
-48.86	-0.79942	-0.31792	-0.59879	-0.45373	-0.33952
-48.52	-0.8164	-0.31792	-0.58953	-0.46453	-0.33335
-48.27	-0.82566	-0.30866	-0.58799	-0.46607	-0.34107
-47.89	-0.82566	-0.29785	-0.58645	-0.46607	-0.33181
-47.55	-0.8272	-0.30403	-0.60188	-0.45373	-0.34107
-47.26	-0.82874	-0.3102	-0.60342	-0.4707	-0.33489
-46.92	-0.82566	-0.30248	-0.60651	-0.46453	-0.3102
-46.57	-0.82411	-0.31483	-0.60651	-0.4707	-0.33335
-46.26	-0.84263	-0.3102	-0.59416	-0.4815	-0.31946
-45.95	-0.84881	-0.31792	-0.57565	-0.48305	-0.31174
-45.67	-0.84881	-0.30866	-0.59416	-0.46607	-0.31637
-45.32	-0.85961	-0.30248	-0.60805	-0.47225	-0.31483
-45.01	-0.87041	-0.3102	-0.61577	-0.47225	-0.31483
-44.76	-0.87196	-0.30866	-0.5988	-0.47842	-0.30711
-44.35	-0.8843	-0.30403	-0.60651	-0.47688	-0.30711
-44.07	-0.88739	-0.30248	-0.61423	-0.47687	-0.2994
-43.73	-0.89202	-0.29477	-0.62966	-0.46762	-0.29168
-43.35	-0.90282	-0.29477	-0.60342	-0.47996	-0.2994
-43.07	-0.90436	-0.30094	-0.60034	-0.47225	-0.29477
-42.76	-0.89665	-0.29785	-0.60188	-0.47533	-0.29477
-42.44	-0.90128	-0.30094	-0.60805	-0.4815	-0.28088
-42.07	-0.89819	-0.29785	-0.60651	-0.48922	-0.27779
-41.79	-0.91208	-0.28859	-0.61114	-0.48922	-0.2747
-41.47	-0.91362	-0.29631	-0.60188	-0.48613	-0.27162
-41.07	-0.92597	-0.29322	-0.59262	-0.47225	-0.27933
-40.82	-0.92751	-0.29785	-0.59108	-0.49385	-0.26699
-40.57	-0.94912	-0.28242	-0.6096	-0.50002	-0.28088
-40.19	-0.96301	-0.28859	-0.6096	-0.49076	-0.27162
-39.75	-0.95221	-0.27934	-0.60034	-0.49694	-0.26853
-39.5	-0.96301	-0.28705	-0.59571	-0.49076	-0.26853
-39.25	-0.95221	-0.29014	-0.58954	-0.48768	-0.26699
-38.88	-0.97072	-0.27934	-0.59571	-0.5062	-0.26544
-38.56	-0.95066	-0.28396	-0.59416	-0.48305	-0.2423
-38.31	-0.96455	-0.28242	-0.60342	-0.50774	-0.24538
-37.94	-0.96918	-0.28551	-0.59725	-0.5062	-0.23921
-37.59	-0.97073	-0.28088	-0.60342	-0.50465	-0.23767
-37.31	-0.98153	-0.28088	-0.59571	-0.51546	-0.22841
-36.97	-0.98307	-0.27162	-0.59416	-0.52626	-0.22223
-36.65	-0.9877	-0.27008	-0.59416	-0.51391	-0.22378
-36.31	-0.99233	-0.28396	-0.59416	-0.50465	-0.21915
-36.03	-0.96918	-0.28242	-0.58953	-0.50157	-0.21606
-35.68	-0.97999	-0.28088	-0.58182	-0.48922	-0.20371
-35.31	-0.97073	-0.27316	-0.58182	-0.49694	-0.19291
-34.99	-0.97381	-0.2639	-0.57565	-0.50002	-0.20063
-34.68	-0.99387	-0.2747	-0.56947	-0.48922	-0.18674
-34.37	-0.99388	-0.2639	-0.56639	-0.47996	-0.19445
-34.12	-0.99542	-0.27007	-0.55867	-0.48613	-0.17131
-33.77	-0.9985	-0.27162	-0.5525	-0.47225	-0.18211
-33.4	-0.98307	-0.2639	-0.55404	-0.48768	-0.196
-33.08	-0.98924	-0.26236	-0.5525	-0.48305	-0.17594
-32.74	-0.98153	-0.27007	-0.54169	-0.49694	-0.17902
-32.49	-0.97999	-0.26545	-0.54941	-0.49231	-0.16513
-32.08	-0.98462	-0.25619	-0.54632	-0.49539	-0.1605
-31.77	-0.9877	-0.25619	-0.52626	-0.50311	-0.15742
-31.43	-0.98925	-0.25464	-0.54478	-0.47533	-0.14507
-31.18	-0.98925	-0.25619	-0.54941	-0.49694	-0.13581
-30.86	-1.00468	-0.24847	-0.53861	-0.49539	-0.12964
-30.49	-0.99696	-0.2423	-0.54015	-0.48922	-0.11883
-30.17	-1.01394	-0.23767	-0.53552	-0.48768	-0.11266
-29.86	-1.00159	-0.24693	-0.52626	-0.49385	-0.10031
-29.55	-1.00776	-0.24384	-0.52626	-0.46762	-0.09723
-29.23	-0.99542	-0.24538	-0.52317	-0.48305	-0.08797
-28.89	-1.00622	-0.24075	-0.50774	-0.48459	-0.08334
-28.58	-0.99696	-0.22532	-0.50311	-0.48305	-0.07871
-28.23	-0.99079	-0.22686	-0.49385	-0.4707	-0.07562
-27.98	-0.98616	-0.2176	-0.48768	-0.46916	-0.07562
-27.64	-1.00159	-0.22223	-0.49385	-0.47533	-0.07099
-27.29	-1.00313	-0.21606	-0.48768	-0.47225	-0.06945
-26.92	-0.99851	-0.21143	-0.47842	-0.47842	-0.05865
-26.67	-1.00313	-0.21606	-0.47225	-0.47225	-0.06482
-26.35	-1.00931	-0.20834	-0.46299	-0.46607	-0.04476
-25.98	-0.99388	-0.20526	-0.44755	-0.4707	-0.03241
-25.76	-0.9985	-0.20063	-0.43984	-0.47225	-0.02932
-25.38	-0.99388	-0.19754	-0.44292	-0.48922	-0.00926
-24.98	-1.00159	-0.18982	-0.45064	-0.47379	0.006173
-24.76	-0.98925	-0.18365	-0.44755	-0.47225	0.010803
-24.41	-0.99079	-0.17439	-0.43366	-0.46607	0.021606
-24.07	-1.00159	-0.17439	-0.44292	-0.46761	0.027779
-23.69	-0.99079	-0.16822	-0.43366	-0.45218	0.033953
-23.48	-0.99542	-0.16822	-0.42595	-0.46916	0.061731
-23.1	-0.98616	-0.1605	-0.41051	-0.46607	0.064818
-22.76	-0.97227	-0.16822	-0.39662	-0.45218	0.060189
-22.44	-0.97381	-0.15279	-0.39045	-0.44601	0.086423
-22.13	-0.97536	-0.15742	-0.38582	-0.44292	0.089511
-21.79	-0.96147	-0.14507	-0.37347	-0.42749	0.097227
-21.47	-0.96147	-0.14661	-0.35496	-0.43366	0.106486
-21.19	-0.96764	-0.14816	-0.3457	-0.41823	0.101857
-20.85	-0.96918	-0.1389	-0.33798	-0.41051	0.10803
-20.5	-0.94912	-0.13118	-0.321	-0.41514	0.121919
-20.19	-0.94449	-0.12964	-0.31174	-0.37965	0.12192
-19.91	-0.93369	-0.12346	-0.30711	-0.41669	0.16513
-19.53	-0.93523	-0.11266	-0.28551	-0.40588	0.149699
-19.22	-0.92443	-0.11883	-0.29322	-0.41514	0.162045
-19	-0.92443	-0.10803	-0.28705	-0.41977	0.175934
-18.59	-0.92597	-0.09105	-0.28396	-0.41669	0.189824
-18.28	-0.92134	-0.09568	-0.28396	-0.41051	0.195998
-17.94	-0.90591	-0.08642	-0.2747	-0.40125	0.231492
-17.65	-0.90591	-0.08025	-0.26545	-0.39971	0.242295
-17.31	-0.90899	-0.07562	-0.25619	-0.38736	0.240753
-17	-0.89819	-0.07099	-0.2531	-0.38891	0.271617
-16.75	-0.88893	-0.06019	-0.24693	-0.38428	0.282421
-16.34	-0.8843	-0.0571	-0.22223	-0.3565	0.294767
-15.99	-0.8735	-0.0571	-0.196	-0.35341	0.302484
-15.74	-0.87659	-0.0463	-0.19137	-0.34415	0.334892
-15.34	-0.85807	-0.04013	-0.17593	-0.34878	0.325633
-15.09	-0.85498	-0.02932	-0.15742	-0.34261	0.327176
-14.71	-0.838	-0.01852	-0.14661	-0.32409	0.32409
-14.43	-0.83646	-0.01698	-0.13272	-0.30866	0.334893
-14.12	-0.82103	-0.01389	-0.0926	-0.30248	0.353412
-13.71	-0.81022	-0.01235	-0.0926	-0.31329	0.354956
-13.49	-0.80251	-0.00154	-0.08025	-0.30403	0.378104
-13.15	-0.79479	0.00463	-0.07099	-0.26853	0.387364
-12.83	-0.77627	0.01389	-0.04939	-0.28396	0.40897
-12.52	-0.7701	0.024692	-0.06019	-0.30248	0.439835
-12.11	-0.76084	0.029322	-0.04939	-0.29168	0.442923
-11.83	-0.75158	0.033953	-0.05401	-0.27625	0.478417
-11.52	-0.75312	0.052471	-0.03704	-0.28242	0.490765
-11.24	-0.73923	0.046299	-0.01698	-0.26853	0.520086
-10.83	-0.72843	0.057101	-0.02778	-0.25773	0.527803
-10.52	-0.71145	0.063275	-0.00926	-0.26081	0.547866
-10.2	-0.69602	0.081794	0.041667	-0.23921	0.566385
-9.92	-0.68676	0.09414	0.024693	-0.22223	0.574102
-9.58	-0.66516	0.100314	0.041669	-0.2176	0.587991
-9.3	-0.66207	0.111117	0.067904	-0.20526	0.608054
-8.89	-0.64201	0.126549	0.092597	-0.18674	0.638918
-8.61	-0.62349	0.126549	0.118833	-0.17748	0.621944
-8.33	-0.61423	0.131179	0.134266	-0.16205	0.638919
-8.04	-0.59725	0.141982	0.152785	-0.14353	0.646636
-7.67	-0.58645	0.148155	0.182107	-0.14353	0.655896
-7.36	-0.56947	0.157415	0.205256	-0.13427	0.672871
-7.01	-0.56176	0.165132	0.214516	-0.12501	0.683675
-6.67	-0.53861	0.180564	0.22532	-0.12501	0.711453
-6.32	-0.517	0.200626	0.242295	-0.11266	0.719171
-6.04	-0.51083	0.194454	0.245382	-0.12038	0.756208
-5.7	-0.48613	0.21143	0.257728	-0.11266	0.773185
-5.38	-0.46299	0.21606	0.256186	-0.10031	0.790161
-5.13	-0.45064	0.234579	0.274704	-0.09414	0.82257
-4.76	-0.44138	0.242296	0.290137	-0.08179	0.84572
-4.48	-0.41823	0.265444	0.291681	-0.06173	0.876585
-4.04	-0.40897	0.268531	0.324089	-0.05864	0.904364
-3.82	-0.38428	0.276248	0.336436	-0.04167	0.927513
-3.44	-0.35959	0.282421	0.358042	-0.02161	0.935231
-3.1	-0.34261	0.304027	0.390451	0.00463	0.984613
-2.82	-0.321	0.31483	0.421316	0.020063	0.969183
-2.57	-0.30557	0.325633	0.433663	0.038582	0.987701
-2.19	-0.28088	0.342609	0.467615	0.057101	1.00468
-1.88	-0.27316	0.341066	0.489221	0.067905	0.995419
-1.5	-0.25001	0.359585	0.518543	0.120374	1.01394
-1.19	-0.22069	0.365758	0.558668	0.091055	1.02937
-0.87641	-0.20371	0.379648	0.572558	0.106487	1.04172
-0.53211	-0.17131	0.385821	0.591078	0.128092	1.0695
-0.2504	-0.15742	0.401254	0.61114	0.132723	1.09573
0.093901	-0.12655	0.4136	0.623487	0.148155	1.1266
0.406905	-0.10957	0.425946	0.642006	0.132723	1.14049
0.688608	-0.08025	0.441379	0.666698	0.157415	1.17135
1.06	-0.06019	0.458355	0.655896	0.165131	1.1837
1.31	-0.04013	0.472245	0.675958	0.162045	1.23926
1.6	-0.02161	0.481505	0.703737	0.183651	1.26086
2	0.007716	0.504653	0.722257	0.194454	1.29019
2.32	0.027779	0.507741	0.760838	0.212973	1.32414
2.6	0.058645	0.52626	0.779358	0.237666	1.35037
3	0.091054	0.541692	0.804051	0.268531	1.37507
3.32	0.115746	0.546323	0.830286	0.283964	1.4013
3.6	0.135809	0.567928	0.847263	0.297854	1.40748
3.98	0.160502	0.577188	0.879669	0.330263	1.4368
4.32	0.189824	0.604967	0.810227	0.382733	1.45069
4.54	0.214516	0.612684	0.882758	0.379648	1.46303
4.88	0.240752	0.632746	0.946032	0.40434	1.49081
5.29	0.265445	0.63892	0.989245	0.422859	1.51396
5.54	0.30557	0.663611	1.02783	0.430577	1.5155
5.82	0.32409	0.668242	1.06024	0.473787	1.53711
6.2	0.362671	0.692934	1.08338	0.455269	1.57261
6.54	0.384278	0.712997	1.1019	0.473788	1.60656
6.89	0.410514	0.7238	1.11888	0.466072	1.64051
7.17	0.442922	0.742319	1.13431	0.481504	1.67909
7.51	0.476874	0.754666	1.12197	0.500024	1.70379
7.79	0.493851	0.768555	1.1482	0.506197	1.75163
8.08	0.520087	0.790161	1.16672	0.523173	1.82107
8.42	0.554039	0.804051	1.18679	0.543236	1.83805
8.7	0.589534	0.816397	1.22382	0.575644	1.8612
9.05	0.612684	0.842632	1.2408	0.584905	1.90287
9.36	0.651265	0.851893	1.28555	0.618857	1.92447
9.64	0.682131	0.867325	1.31179	0.646636	1.93682
10.05	0.703738	0.884301	1.33648	0.677502	1.95071
10.39	0.746949	0.893562	1.37198	0.71454	1.96614
10.7	0.783988	0.92134	1.42136	0.736147	1.99392
10.99	0.814854	0.938317	1.48155	0.776271	1.99238
11.33	0.84109	0.958379	1.50316	0.800964	2.01399
11.58	0.875042	0.966095	1.54328	0.807138	2.04022
11.99	0.910537	0.972269	1.56489	0.833373	2.04948
12.3	0.946033	1.00159	1.58804	0.847263	2.10195
12.58	0.984615	1.04017	1.61582	0.858066	2.13282
12.9	1.01857	1.05406	1.63742	0.88893	2.15597
13.27	1.05561	1.07567	1.64205	0.875042	2.19764
13.55	1.08493	1.10345	1.68372	0.887388	2.24856
13.9	1.11734	1.12505	1.67138	0.91671	2.29178
14.24	1.15129	1.1374	1.69916	0.915168	2.33344
14.59	1.18833	1.14666	1.73002	0.942947	2.36122
14.87	1.21611	1.17907	1.72385	0.981528	2.42295
15.21	1.2516	1.19759	1.77015	0.996962	2.45999
15.52	1.28864	1.20839	1.78712	1.03554	2.51864
15.84	1.32722	1.23771	1.82108	1.07258	2.52481
16.12	1.37507	1.26241	1.88281	1.10962	2.53562
16.43	1.40439	1.27784	1.91676	1.13586	2.58654
16.84	1.44143	1.29327	1.9538	1.16209	2.58037
17.09	1.48772	1.32259	2.01707	1.19142	2.62049
17.37	1.50316	1.33803	2.03868	1.23771	2.61587
17.65	1.5618	1.36272	2.07726	1.27475	2.65445
18.03	1.60038	1.38124	2.12047	1.31488	2.67451
18.31	1.62045	1.39667	2.16523	1.31488	2.71155
18.72	1.67601	1.41828	2.18838	1.32877	2.70692
19.03	1.70996	1.4476	2.21461	1.36735	2.75785
19.34	1.74854	1.47075	2.25937	1.37507	2.7918
19.63	1.78558	1.47847	2.25474	1.37661	2.8381
19.97	1.83651	1.49544	2.28252	1.39821	2.87668
20.31	1.87046	1.51859	2.31493	1.4121	2.91681
20.56	1.91213	1.56798	2.35196	1.43217	2.97854
20.97	1.9538	1.57261	2.38437	1.4584	2.9986
21.32	1.99238	1.5973	2.41832	1.5047	3.02329
21.57	2.03096	1.62199	2.29332	1.52168	3.08965
21.97	2.08035	1.64205	2.40289	1.55409	3.12978
22.19	2.12201	1.67909	2.46617	1.60038	3.18379
22.54	2.16214	1.70378	2.5171	1.62508	3.20077
22.91	2.20535	1.7115	2.56185	1.67601	3.23935
23.22	2.25782	1.74237	2.60969	1.70996	3.24553
23.51	2.29023	1.75471	2.66988	1.75626	3.27022
23.79	2.33807	1.78095	2.72081	1.7933	3.28102
24.13	2.37974	1.80873	2.74859	1.85194	3.31497
24.57	2.41833	1.82262	2.81804	1.85966	3.32886
24.79	2.46617	1.84114	2.86433	1.88898	3.35664
25.13	2.50629	1.8828	2.90137	1.9183	3.41529
25.51	2.56185	1.88744	2.92452	1.92139	3.42918
25.79	2.60043	1.91213	2.94304	1.9291	3.48165
26.1	2.64056	1.94454	2.95384	1.93991	3.53258
26.48	2.68223	1.96614	2.96928	1.96923	3.57116
26.79	2.75167	2.00318	3.01249	2.00472	3.6406
27.11	2.77945	2.01862	3.01249	1.99238	3.66684
27.39	2.82421	2.05565	3.04027	2.02633	3.72857
27.73	2.86125	2.08189	3.0557	2.07263	3.77642
28.08	2.91063	2.10967	3.10509	2.12201	3.85203
28.36	2.96928	2.13899	3.12669	2.14053	3.89679
28.64	3.00169	2.17912	3.18225	2.18992	3.91222
29.05	3.05879	2.20381	3.21466	2.2393	3.95544
29.33	3.08965	2.2393	3.26559	2.2856	3.99865
29.67	3.1483	2.26554	3.29954	2.33653	4.03877
30.08	3.20231	2.29332	3.37053	2.3782	4.06964
30.3	3.23781	2.32727	3.41529	2.4245	4.06964
30.61	3.28411	2.34733	3.47856	2.4708	4.09279
30.96	3.34121	2.3782	3.51869	2.48932	4.1468
31.27	3.38288	2.38283	3.58042	2.54333	4.16532
31.64	3.43844	2.42604	3.6082	2.54796	4.19619
31.93	3.48628	2.44919	3.63443	2.57265	4.2394
32.27	3.53103	2.48006	3.6761	2.58654	4.2857
32.58	3.58505	2.51092	3.69771	2.58963	4.33663
32.87	3.62672	2.55259	3.71777	2.62667	4.38601
33.15	3.67456	2.57574	3.72086	2.63747	4.44774
33.52	3.72549	2.60198	3.74092	2.65753	4.5033
33.8	3.76716	2.63593	3.78722	2.69303	4.56658
34.12	3.81963	2.65445	3.78413	2.72853	4.61287
34.52	3.87364	2.68377	3.82426	2.77174	4.67152
34.77	3.92611	2.72544	3.87981	2.82884	4.6885
35.12	3.97087	2.74396	3.91531	2.87514	4.74868
35.43	4.02334	2.75476	3.95235	2.91526	4.77338
35.78	4.07118	2.79952	4.02643	2.98008	4.8027
36.09	4.13137	2.82421	4.0789	3.0341	4.81813
36.4	4.18847	2.85353	4.136	3.08502	4.85208
36.72	4.22705	2.87822	4.19156	3.13595	4.86597
37.03	4.26872	2.91835	4.24249	3.18379	4.89993
37.37	4.332	2.9523	4.30885	3.21003	4.93079
37.65	4.3891	2.97545	4.34897	3.2517	4.96166
38.03	4.43694	3.00169	4.38447	3.26867	5.01721
38.34	4.49404	3.03873	4.38756	3.30726	5.06814
38.66	4.55114	3.06496	4.42768	3.31652	5.11599
38.94	4.59898	3.08657	4.48324	3.34738	5.17617
39.34	4.64991	3.12206	4.54805	3.3659	5.23173
39.63	4.70238	3.15138	4.53108	3.39368	5.28729
39.91	4.75331	3.17608	4.55269	3.40448	5.35828
40.25	4.81196	3.2162	4.58509	3.43998	5.41384
40.57	4.86906	3.25478	4.59744	3.49245	5.46322
40.91	4.91844	3.29645	4.64991	3.51869	5.54347
41.22	4.96937	3.33349	4.69313	3.58196	5.5944
41.57	5.02802	3.36744	4.72862	3.6298	5.67002
41.88	5.0774	3.39522	4.79344	3.68227	5.70243
42.22	5.13913	3.42763	4.84282	3.74092	5.72712
42.57	5.19624	3.46467	4.91073	3.81345	5.74873
42.88	5.24408	3.47856	4.974	3.84586	5.80274
43.16	5.30272	3.51714	5.03728	3.91994	5.77651
43.51	5.34285	3.54801	5.08203	3.96161	5.83207
43.85	5.39223	3.57887	5.14685	3.98476	5.85367
44.2	5.46322	3.60974	5.21167	4.0218	5.87991
44.51	5.51724	3.64061	5.24716	4.04803	5.92775
44.76	5.58823	3.67147	5.24562	4.06964	5.98331
45.1	5.64379	3.70851	5.30118	4.10513	6.02807
45.42	5.687	3.73166	5.32741	4.10359	6.07745
45.73	5.76108	3.77178	5.36137	4.15143	6.14844
45.98	5.81509	3.79648	5.37526	4.16687	6.22406
46.39	5.86756	3.84432	5.40458	4.19156	6.29351
46.73	5.92621	3.88136	5.42001	4.2286	6.37376
47.04	5.98794	3.91531	5.44471	4.27181	6.43549
47.36	6.04196	3.95852	5.52341	4.30268	6.51729
47.64	6.10986	3.97704	5.54656	4.38447	6.55895
48.05	6.1685	4.02951	5.57434	4.42305	6.59445
48.3	6.21635	4.06038	5.64533	4.50176	6.63921
48.61	6.27653	4.10822	5.70398	4.54497	6.6639
48.95	6.32438	4.12674	5.77034	4.60516	6.67625
49.3	6.38765	4.17458	5.82898	4.6638	6.74415
49.61	6.43549	4.19001	5.9046	4.73171	6.72872
49.92	6.49414	4.22705	5.95399	4.76875	6.80742
50.27	6.53889	4.26101	6.03578	4.81659	6.79508
50.55	6.60217	4.29959	6.09751	4.85517	6.84446
50.89	6.67007	4.31811	6.12992	4.88141	6.87996
51.24	6.7318	4.35669	6.17622	4.9061	6.94941
51.49	6.78427	4.36441	6.19474	4.93696	7.00959
51.8	6.84446	4.4462	6.22869	4.9848	7.08367
52.18	6.90928	4.48478	6.26419	4.97709	7.13151
52.46	6.96021	4.51565	6.27036	5.02339	7.21331
52.77	7.02194	4.54651	6.2966	5.04191	7.28276
53.15	7.06207	4.58355	6.34598	5.08358	7.37227
53.49	7.13614	4.61596	6.35216	5.14376	7.45715
53.81	7.19633	4.64065	6.39382	5.19778	7.5127
54.12	7.27658	4.69467	6.44938	5.25488	7.55437
54.49	7.3414	4.74714	6.51574	5.35674	7.59604
54.71	7.3877	4.78109	6.56513	5.366	7.68246
55.12	7.4448	4.82893	6.63149	5.4802	7.67166
55.43	7.49882	4.86906	6.70402	5.52033	7.6871
55.71	7.57906	4.92307	6.77656	5.56045	7.72876
56.06	7.62691	4.96783	6.83675	5.62681	7.77506
56.37	7.68247	4.99715	6.89539	5.67157	7.76735
56.68	7.75037	5.03419	6.95404	5.73021	7.86766
57.03	7.82599	5.07432	7.01577	5.78114	7.85223
57.31	7.87692	5.11135	7.08676	5.80892	7.91704
57.66	7.94328	5.14839	7.10219	5.85522	7.94637
58	8.00193	5.18235	7.17009	5.84596	8.00193
58.25	8.05748	5.21938	7.15929	5.88145	8.08526
58.69	8.1223	5.24562	7.18553	5.89226	8.16088
58.94	8.19946	5.28729	7.20559	5.91849	8.24422
59.19	8.25348	5.34593	7.25035	5.96016	8.29515
59.56	8.31213	5.38452	7.29047	6.00337	8.43404
59.91	8.3754	5.40612	7.3059	6.04813	8.45874
60.22	8.45256	5.44007	7.34757	6.09443	8.53744
60.44	8.50812	5.47403	7.41856	6.14998	8.61152
60.88	8.56831	5.50952	7.45406	6.21172	8.64393
61.22	8.63158	5.56354	7.50499	6.329	8.65628
61.54	8.69486	5.61138	7.56672	6.3537	8.69486
61.79	8.75968	5.6407	7.65314	6.40617	8.75813
62.16	8.82758	5.67465	7.73494	6.4679	8.79209
62.51	8.90166	5.73638	7.78587	6.55741	8.79209
62.85	8.95567	5.77805	7.83371	6.6068	8.83993
63.13	9.00506	5.8367	7.92785	6.68242	8.88005
63.45	9.0884	5.86602	7.9973	6.73026	8.9032
63.76	9.14859	5.87837	8.0652	6.73489	8.93561
64.13	9.19951	5.93547	8.10687	6.7673	9.01432
64.38	9.26896	5.9864	8.14854	6.79045	9.10537
64.73	9.34767	6.01263	8.13311	6.79662	9.16556
65.04	9.41557	6.05121	8.18558	6.84138	9.21649
65.36	9.48193	6.07745	8.22724	6.87996	9.30137
65.73	9.53904	6.13455	8.26583	6.89694	9.38316
66.01	9.60385	6.19011	8.25966	6.96021	9.44798
66.36	9.67639	6.22869	8.32138	6.99416	9.502
66.67	9.73503	6.27962	8.35534	7.05435	9.57916
66.98	9.81374	6.32129	8.39238	7.1346	9.6625
67.26	9.89399	6.37376	8.4433	7.21639	9.72732
67.61	9.9619	6.40926	8.5359	7.26732	9.75818
68.02	10.0236	6.45093	8.62232	7.37535	9.79214
68.23	10.0946	6.48796	8.664	7.42782	9.85232
68.61	10.1718	6.53889	8.76894	7.46949	9.88164
68.95	10.2273	6.58365	8.81524	7.54203	9.8801
69.21	10.2937	6.62686	8.89086	7.62999	9.94337
69.58	10.3662	6.65927	8.9603	7.65932	9.96961
69.86	10.4264	6.70094	9.02203	7.67475	10.0468
70.24	10.4835	6.75341	9.05445	7.71333	10.0406
70.49	10.5653	6.78427	9.10846	7.76272	10.1209
70.8	10.6301	6.80897	9.12852	7.81519	10.2011
71.18	10.678	6.85372	9.15322	7.82753	10.2536
71.46	10.7459	6.90619	9.21032	7.84297	10.3261
71.83	10.8308	6.95712	9.21032	7.91396	10.4125
72.18	10.9002	7.01885	9.27205	7.92167	10.4912
72.52	10.9511	7.03583	9.33069	7.97415	10.5483
72.84	11.0144	7.06978	9.34458	8.04977	10.6564
73.12	11.0854	7.11762	9.38471	8.08989	10.7629
73.37	11.1641	7.15929	9.43718	8.18095	10.7984
73.77	11.2351	7.20713	9.49891	8.26428	10.8632
74.09	11.3061	7.238	9.55447	8.3183	10.9064
74.37	11.3725	7.28121	9.61003	8.40472	10.9573
74.71	11.4064	7.34603	9.69336	8.47108	11.0082
75.03	11.4836	7.3985	9.78287	8.52047	11.0206
75.34	11.5468	7.44171	9.87084	8.61615	11.0298
75.68	11.6286	7.48647	9.92949	8.69023	11.0746
76.09	11.7027	7.54511	10.0375	8.69949	11.1456
76.37	11.7536	7.57752	10.0884	8.74733	11.1332
76.65	11.8277	7.62536	10.1455	8.82604	11.1996
77	11.9018	7.65006	10.1996	8.82758	11.2907
77.25	11.9774	7.69944	10.2196	8.90011	11.3647
77.62	12.0376	7.73648	10.2505	8.86771	11.4326
77.94	12.1101	7.76272	10.3246	8.9032	11.5623
78.34	12.1765	7.83216	10.3107	8.98191	11.5901
78.72	12.2552	7.87692	10.3338	8.97882	11.6857
78.88	12.3108	7.9263	10.4079	9.00969	11.7367
79.28	12.3818	7.96952	10.4064	9.07605	11.8385
79.57	12.4327	8.02507	10.4573	9.13932	11.9064
79.85	12.5099	8.07292	10.5113	9.17174	11.9944
80.22	12.6102	8.1223	10.5499	9.27822	12.0407

## Sheet: Fig. 4B
Reversal potentials (in mV) for the indicated extracellular anion, for each cell measured
Cl-	I-	Br-	NO3-	SCN-
-2.05	-10.69	-11.26	-14.78	-17.47
1.54	-13.31	-6.98	-14.85	-17.86
-0.32	-14.02	-6.34	-11.52	-15.49
-0.9	-16.06	-5.12	-9.41	-19.33
1.79	-9.09	-3.65	-10.88	-25.28
-1.21	-16.13	-10.37	-12.48	-30.27
3.58	-13.38	-6.59	-13.7	-29.95
4.35	-18.24	-2.3	-7.36	-16
3.14		-3.52	-9.79	-18.69
0		-4.48	-10.56	-17.6
3.07		-2.5	-9.79	-20.8

## Sheet: Fig. 4C
Currents (in nA) as a function of voltage with the indicated extracellular anion in a representative cell
The trace for chloride was notch filtered to remove line noise in Fig. 4C. Filtered and unfiltered data are given.
Voltage (mV)	Cl-	Gluc-	Voltage (mV)	Cl- (filtered)
-80.03	-0.472	-0.0509	-80.03	-0.472616
-79.78	-0.463	-0.0417	-79.78	-0.473897
-79.44	-0.455	-0.0478	-79.44	-0.47519
-79.1	-0.469	-0.0478	-79.1	-0.477069
-78.78	-0.469	-0.0448	-78.78	-0.478901
-78.47	-0.486	-0.0417	-78.47	-0.480972
-78.16	-0.491	-0.0432	-78.16	-0.483089
-77.78	-0.483	-0.0386	-77.78	-0.484935
-77.53	-0.483	-0.0355	-77.53	-0.487117
-77.25	-0.494	-0.0324	-77.25	-0.489521
-76.87	-0.485	-0.0432	-76.87	-0.49221
-76.56	-0.485	-0.0432	-76.56	-0.495102
-76.25	-0.508	-0.0448	-76.25	-0.498693
-75.9	-0.511	-0.037	-75.9	-0.50276
-75.53	-0.512	-0.0417	-75.53	-0.506685
-75.31	-0.502	-0.0478	-75.31	-0.510715
-74.9	-0.525	-0.0478	-74.9	-0.515372
-74.56	-0.515	-0.0556	-74.56	-0.519206
-74.24	-0.517	-0.0432	-74.24	-0.525182
-73.96	-0.528	-0.0293	-73.96	-0.530722
-73.62	-0.534	-0.0509	-73.62	-0.53601
-73.31	-0.537	-0.037	-73.31	-0.541521
-73.02	-0.546	-0.0386	-73.02	-0.54652
-72.68	-0.557	-0.034	-72.68	-0.552094
-72.34	-0.548	-0.0417	-72.34	-0.55768
-72.08	-0.577	-0.0432	-72.08	-0.563292
-71.65	-0.563	-0.0324	-71.65	-0.568804
-71.3	-0.574	-0.0386	-71.3	-0.573951
-71.02	-0.565	-0.0417	-71.02	-0.578893
-70.77	-0.577	-0.0494	-70.77	-0.584059
-70.46	-0.58	-0.0401	-70.46	-0.58912
-70.05	-0.59	-0.0417	-70.05	-0.594792
-69.83	-0.613	-0.0463	-69.83	-0.600832
-69.46	-0.617	-0.0401	-69.46	-0.606316
-69.08	-0.625	-0.0401	-69.08	-0.612164
-68.77	-0.631	-0.0432	-68.77	-0.61788
-68.42	-0.64	-0.0432	-68.42	-0.62285
-68.2	-0.631	-0.037	-68.2	-0.627449
-67.86	-0.627	-0.0447	-67.86	-0.632773
-67.55	-0.644	-0.0293	-67.55	-0.637813
-67.17	-0.654	-0.0401	-67.17	-0.642547
-66.95	-0.645	-0.0417	-66.95	-0.646484
-66.58	-0.687	-0.034	-66.58	-0.651991
-66.26	-0.625	-0.034	-66.26	-0.656977
-65.82	-0.645	-0.034	-65.82	-0.661456
-65.51	-0.661	-0.0309	-65.51	-0.666246
-65.17	-0.661	-0.0355	-65.17	-0.670786
-64.89	-0.687	-0.0262	-64.89	-0.675085
-64.6	-0.676	-0.0278	-64.6	-0.679229
-64.35	-0.682	-0.034	-64.35	-0.682994
-63.88	-0.687	-0.037	-63.88	-0.686732
-63.63	-0.696	-0.037	-63.63	-0.691099
-63.32	-0.704	-0.037	-63.32	-0.695402
-63.04	-0.705	-0.0278	-63.04	-0.70101
-62.66	-0.713	-0.0355	-62.66	-0.706386
-62.29	-0.719	-0.0417	-62.29	-0.71166
-62.01	-0.718	-0.0401	-62.01	-0.717024
-61.79	-0.713	-0.0509	-61.79	-0.72252
-61.44	-0.725	-0.0386	-61.44	-0.728535
-61.16	-0.711	-0.0494	-61.16	-0.734589
-60.79	-0.724	-0.0448	-60.79	-0.740645
-60.44	-0.739	-0.0494	-60.44	-0.746318
-60.1	-0.75	-0.037	-60.1	-0.752457
-59.75	-0.748	-0.0324	-59.75	-0.758424
-59.5	-0.762	-0.0324	-59.5	-0.764201
-59.16	-0.776	-0.0355	-59.16	-0.770361
-58.75	-0.796	-0.0309	-58.75	-0.776756
-58.53	-0.767	-0.0278	-58.53	-0.782783
-58.12	-0.773	-0.0262	-58.12	-0.790215
-57.94	-0.79	-0.0386	-57.94	-0.79513
-57.56	-0.789	-0.0278	-57.56	-0.800666
-57.25	-0.803	-0.0324	-57.25	-0.806478
-56.94	-0.815	-0.0309	-56.94	-0.812562
-56.5	-0.832	-0.0324	-56.5	-0.819368
-56.22	-0.863	-0.0386	-56.22	-0.826167
-55.97	-0.863	-0.0401	-55.97	-0.833098
-55.62	-0.88	-0.0293	-55.62	-0.840459
-55.34	-0.878	-0.0355	-55.34	-0.84727
-54.99	-0.849	-0.0401	-54.99	-0.854389
-54.65	-0.847	-0.0247	-54.65	-0.86183
-54.27	-0.861	-0.034	-54.27	-0.868638
-54.02	-0.86	-0.0432	-54.02	-0.875693
-53.71	-0.864	-0.037	-53.71	-0.882467
-53.3	-0.87	-0.0386	-53.3	-0.889342
-52.99	-0.875	-0.034	-52.99	-0.895645
-52.71	-0.886	-0.0262	-52.71	-0.902032
-52.43	-0.911	-0.0293	-52.43	-0.908308
-52.08	-0.912	-0.0355	-52.08	-0.914596
-51.68	-0.915	-0.0401	-51.68	-0.921106
-51.43	-0.921	-0.0448	-51.43	-0.927142
-51.11	-0.929	-0.0386	-51.11	-0.933464
-50.71	-0.937	-0.0278	-50.71	-0.939549
-50.46	-0.946	-0.0386	-50.46	-0.94625
-50.08	-0.948	-0.0386	-50.08	-0.952294
-49.8	-0.978	-0.0386	-49.8	-0.957986
-49.49	-0.98	-0.0185	-49.49	-0.963704
-49.17	-0.992	-0.0309	-49.17	-0.969482
-48.83	-0.988	-0.0432	-48.83	-0.974877
-48.52	-0.995	-0.0401	-48.52	-0.980483
-48.23	-0.989	-0.0309	-48.23	-0.986197
-47.86	-0.992	-0.0386	-47.86	-0.992299
-47.55	-0.982	-0.0417	-47.55	-0.998813
-47.26	-1.01	-0.0401	-47.26	-1.00564
-46.92	-1.01	-0.0324	-46.92	-1.0128
-46.61	-1	-0.0216	-46.61	-1.01928
-46.26	-1.03	-0.0309	-46.26	-1.02514
-45.92	-1.03	-0.0232	-45.92	-1.03089
-45.57	-1.04	-0.0309	-45.57	-1.03584
-45.29	-1.03	-0.0309	-45.29	-1.04046
-44.95	-1.06	-0.0309	-44.95	-1.0451
-44.67	-1.04	-0.0309	-44.67	-1.0497
-44.38	-1.05	-0.0339	-44.38	-1.05387
-44.07	-1.06	-0.0262	-44.07	-1.05871
-43.7	-1.06	-0.0278	-43.7	-1.06327
-43.35	-1.07	-0.0386	-43.35	-1.0676
-43.01	-1.07	-0.0262	-43.01	-1.07233
-42.72	-1.09	-0.0309	-42.72	-1.0772
-42.41	-1.09	-0.0432	-42.41	-1.0819
-42.13	-1.08	-0.0278	-42.13	-1.08705
-41.72	-1.09	-0.0355	-41.72	-1.09183
-41.47	-1.1	-0.034	-41.47	-1.09742
-41.13	-1.09	-0.0478	-41.13	-1.10276
-40.75	-1.11	-0.0262	-40.75	-1.10847
-40.5	-1.11	-0.0386	-40.5	-1.11431
-40.13	-1.12	-0.0386	-40.13	-1.12049
-39.81	-1.14	-0.0386	-39.81	-1.12575
-39.5	-1.13	-0.0432	-39.5	-1.13146
-39.13	-1.14	-0.0309	-39.13	-1.136
-38.88	-1.13	-0.0262	-38.88	-1.14085
-38.56	-1.12	-0.0324	-38.56	-1.14503
-38.19	-1.13	-0.017	-38.19	-1.1488
-37.9	-1.14	-0.0293	-37.9	-1.15387
-37.53	-1.16	-0.0324	-37.53	-1.15796
-37.25	-1.17	-0.0386	-37.25	-1.1623
-36.93	-1.17	-0.0293	-36.93	-1.16653
-36.59	-1.17	-0.037	-36.59	-1.1715
-36.25	-1.19	-0.034	-36.25	-1.17573
-36	-1.19	-0.0401	-36	-1.18056
-35.62	-1.2	-0.0478	-35.62	-1.1851
-35.34	-1.21	-0.0324	-35.34	-1.18962
-34.96	-1.2	-0.0278	-34.96	-1.19408
-34.65	-1.2	-0.0309	-34.65	-1.1982
-34.31	-1.21	-0.0309	-34.31	-1.20283
-33.99	-1.2	-0.0293	-33.99	-1.20763
-33.68	-1.21	-0.0324	-33.68	-1.21161
-33.43	-1.21	-0.0247	-33.43	-1.21505
-33.02	-1.22	-0.0293	-33.02	-1.21805
-32.74	-1.22	-0.0216	-32.74	-1.22058
-32.43	-1.21	-0.0278	-32.43	-1.22267
-32.08	-1.2	-0.0293	-32.08	-1.22468
-31.77	-1.22	-0.0309	-31.77	-1.22658
-31.46	-1.2	-0.0324	-31.46	-1.22872
-31.11	-1.22	-0.0232	-31.11	-1.23024
-30.77	-1.23	-0.0324	-30.77	-1.23224
-30.49	-1.25	-0.0309	-30.49	-1.23373
-30.14	-1.25	-0.0432	-30.14	-1.23405
-29.86	-1.23	-0.0324	-29.86	-1.23437
-29.58	-1.26	-0.0448	-29.58	-1.23439
-29.2	-1.26	-0.0432	-29.2	-1.23476
-28.86	-1.25	-0.0478	-28.86	-1.23495
-28.55	-1.25	-0.0463	-28.55	-1.23442
-28.17	-1.25	-0.0432	-28.17	-1.23401
-27.92	-1.23	-0.0401	-27.92	-1.23426
-27.61	-1.24	-0.0324	-27.61	-1.23454
-27.23	-1.23	-0.0324	-27.23	-1.2348
-26.92	-1.23	-0.0417	-26.92	-1.23479
-26.64	-1.23	-0.0417	-26.64	-1.23367
-26.23	-1.22	-0.0309	-26.23	-1.23259
-25.98	-1.2	-0.037	-25.98	-1.23123
-25.67	-1.2	-0.0355	-25.67	-1.22851
-25.32	-1.21	-0.0293	-25.32	-1.22567
-24.98	-1.22	-0.0232	-24.98	-1.22273
-24.73	-1.21	-0.0355	-24.73	-1.21971
-24.35	-1.23	-0.0324	-24.35	-1.2169
-24.01	-1.22	-0.0309	-24.01	-1.21363
-23.73	-1.22	-0.0309	-23.73	-1.20979
-23.32	-1.22	-0.0262	-23.32	-1.20656
-23.04	-1.22	-0.0386	-23.04	-1.20266
-22.76	-1.2	-0.0324	-22.76	-1.19919
-22.38	-1.19	-0.0278	-22.38	-1.19588
-22.13	-1.2	-0.0355	-22.13	-1.19291
-21.79	-1.19	-0.0309	-21.79	-1.18983
-21.47	-1.19	-0.0278	-21.47	-1.18577
-21.13	-1.18	-0.0432	-21.13	-1.18268
-20.85	-1.18	-0.0278	-20.85	-1.17889
-20.47	-1.19	-0.0216	-20.47	-1.17463
-20.22	-1.17	-0.0324	-20.22	-1.17047
-19.84	-1.15	-0.0247	-19.84	-1.16497
-19.44	-1.13	-0.0278	-19.44	-1.15853
-19.16	-1.12	-0.0432	-19.16	-1.15174
-18.87	-1.12	-0.037	-18.87	-1.14391
-18.53	-1.13	-0.0309	-18.53	-1.13603
-18.28	-1.11	-0.0339	-18.28	-1.12783
-17.87	-1.11	-0.0232	-17.87	-1.11937
-17.53	-1.13	-0.0355	-17.53	-1.10987
-17.28	-1.13	-0.0324	-17.28	-1.10009
-16.96	-1.12	-0.0293	-16.96	-1.09078
-16.59	-1.12	-0.034	-16.59	-1.08155
-16.28	-1.1	-0.034	-16.28	-1.07197
-15.99	-1.09	-0.034	-15.99	-1.063
-15.62	-1.08	-0.034	-15.62	-1.05385
-15.4	-1.06	-0.0401	-15.4	-1.04416
-15.06	-1.04	-0.0293	-15.06	-1.03503
-14.77	-1.02	-0.0417	-14.77	-1.02558
-14.43	-1	-0.037	-14.43	-1.01465
-14.05	-0.985	-0.037	-14.05	-1.00301
-13.8	-0.966	-0.0293	-13.8	-0.991241
-13.49	-0.954	-0.0278	-13.49	-0.97819
-13.05	-0.924	-0.0355	-13.05	-0.964647
-12.77	-0.924	-0.034	-12.77	-0.950387
-12.46	-0.906	-0.0309	-12.46	-0.935397
-12.18	-0.875	-0.0293	-12.18	-0.920706
-11.8	-0.895	-0.0401	-11.8	-0.904896
-11.42	-0.883	-0.034	-11.42	-0.888471
-11.14	-0.881	-0.034	-11.14	-0.871621
-10.89	-0.886	-0.034	-10.89	-0.854376
-10.55	-0.867	-0.034	-10.55	-0.837051
-10.17	-0.858	-0.0432	-10.17	-0.820709
-9.89	-0.835	-0.0386	-9.89	-0.803596
-9.61	-0.826	-0.037	-9.61	-0.786253
-9.23	-0.809	-0.0386	-9.23	-0.76927
-8.89	-0.776	-0.037	-8.89	-0.752514
-8.61	-0.756	-0.0324	-8.61	-0.735813
-8.2	-0.73	-0.0386	-8.2	-0.719028
-7.95	-0.701	-0.0278	-7.95	-0.701733
-7.67	-0.667	-0.0339	-7.67	-0.684358
-7.32	-0.654	-0.0278	-7.32	-0.666587
-7.01	-0.602	-0.0278	-7.01	-0.653395
-6.67	-0.577	-0.037	-6.67	-0.634992
-6.39	-0.571	-0.0432	-6.39	-0.613846
-6.01	-0.548	-0.0324	-6.01	-0.59158
-5.7	-0.526	-0.037	-5.7	-0.569784
-5.41	-0.526	-0.0201	-5.41	-0.546215
-5.04	-0.512	-0.0309	-5.04	-0.52233
-4.79	-0.497	-0.0401	-4.79	-0.497762
-4.41	-0.495	-0.0401	-4.41	-0.473472
-4.07	-0.472	-0.0417	-4.07	-0.449101
-3.76	-0.469	-0.0432	-3.76	-0.424205
-3.44	-0.448	-0.0432	-3.44	-0.400114
-3.07	-0.417	-0.0417	-3.07	-0.376311
-2.79	-0.392	-0.0386	-2.79	-0.352664
-2.41	-0.366	-0.0494	-2.41	-0.329328
-2.13	-0.313	-0.0401	-2.13	-0.306801
-1.82	-0.287	-0.0293	-1.82	-0.283324
-1.5	-0.262	-0.0463	-1.5	-0.258917
-1.19	-0.241	-0.0386	-1.19	-0.234707
-0.87641	-0.208	-0.0417	-0.87641	-0.210102
-0.50081	-0.17	-0.0386	-0.50081	-0.183665
-0.1878	-0.147	-0.0309	-0.1878	-0.156414
0.125201	-0.119	-0.037	0.125201	-0.12787
0.375604	-0.0849	-0.0324	0.375604	-0.098519
0.719908	-0.0617	-0.037	0.719908	-0.068557
0.970311	0.159	-0.034	0.970311	-0.0384146
1.35	0.054	-0.0309	1.35	-0.00684369
1.72	0.0139	-0.0309	1.72	0.0252707
2.03	0.0216	-0.0355	2.03	0.0572062
2.35	0.0802	-0.0401	2.35	0.0889726
2.72	0.0664	-0.0401	2.72	0.12099
2.94	0.0911	-0.0324	2.94	0.152491
3.29	0.123	-0.037	3.29	0.182775
3.63	0.159	-0.0401	3.63	0.213443
3.98	0.202	-0.034	3.98	0.244024
4.23	0.248	-0.0324	4.23	0.274798
4.57	0.289	-0.0401	4.57	0.304354
4.91	0.344	-0.0185	4.91	0.335221
5.23	0.386	-0.0247	5.23	0.36697
5.51	0.424	-0.0355	5.51	0.399362
5.92	0.506	-0.0232	5.92	0.432347
6.2	0.52	-0.0324	6.2	0.466723
6.51	0.545	-0.0324	6.51	0.5025
6.85	0.594	-0.0339	6.85	0.538607
7.14	0.631	-0.0262	7.14	0.574842
7.51	0.633	-0.0216	7.51	0.611497
7.83	0.653	-0.0185	7.83	0.648173
8.2	0.659	-0.0401	8.2	0.684764
8.45	0.682	-0.0324	8.45	0.720334
8.73	0.718	-0.034	8.73	0.756359
9.14	0.748	-0.0432	9.14	0.792504
9.39	0.776	-0.0417	9.39	0.83432
9.7	0.81	-0.0401	9.7	0.872548
10.11	0.849	-0.0448	10.11	0.907872
10.45	0.906	-0.037	10.45	0.944131
10.7	0.951	-0.0262	10.7	0.981027
10.99	1	-0.0339	10.99	1.01623
11.3	1.09	-0.0309	11.3	1.0525
11.64	1.13	-0.0278	11.64	1.08906
11.99	1.17	-0.0216	11.99	1.12654
12.33	1.22	-0.017	12.33	1.16457
12.65	1.3	-0.0262	12.65	1.20435
12.96	1.31	-0.0293	12.96	1.24558
13.37	1.34	-0.0293	13.37	1.28748
13.55	1.37	-0.0339	13.55	1.33056
13.96	1.4	-0.0309	13.96	1.37433
14.18	1.43	-0.0247	14.18	1.41988
14.52	1.43	-0.0232	14.52	1.46474
14.9	1.46	-0.0309	14.9	1.50843
15.21	1.49	-0.0309	15.21	1.55326
15.59	1.52	-0.0309	15.59	1.59835
15.87	1.57	-0.0262	15.87	1.64211
16.21	1.61	-0.0339	16.21	1.68484
16.43	1.69	-0.0216	16.43	1.72808
16.84	1.73	-0.0278	16.84	1.77042
17.18	1.77	-0.0309	17.18	1.81102
17.4	1.84	-0.0293	17.4	1.85277
17.75	1.91	-0.0278	17.75	1.89565
18.12	2.01	-0.0185	18.12	1.93854
18.37	2.02	-0.0262	18.37	1.98239
18.72	2.09	-0.0139	18.72	2.02817
19.09	2.17	-0.017	19.09	2.07373
19.31	2.19	-0.0185	19.31	2.12066
19.78	2.24	-0.0216	19.78	2.16961
20.09	2.27	-0.0247	20.09	2.21974
20.31	2.32	-0.017	20.31	2.27085
20.69	2.33	-0.017	20.69	2.32151
21.03	2.34	-0.017	21.03	2.37425
21.38	2.39	-0.0247	21.38	2.42612
21.66	2.41	-0.0262	21.66	2.47632
21.97	2.44	-0.0262	21.97	2.52725
22.25	2.48	-0.0293	22.25	2.57738
22.6	2.54	-0.0262	22.6	2.6268
22.94	2.63	-0.0262	22.94	2.67434
23.26	2.67	-0.0216	23.26	2.72117
23.57	2.73	-0.017	23.57	2.7668
23.85	2.81	-0.0139	23.85	2.81323
24.26	2.9	-0.0139	24.26	2.86058
24.54	2.92	-0.0185	24.54	2.90764
24.85	3	-0.0123	24.85	2.95679
25.2	3.13	-0.00155	25.2	3.00702
25.48	3.16	-0.0123	25.48	3.05729
25.85	3.18	-0.0108	25.85	3.10982
26.23	3.24	-0.0108	26.23	3.16309
26.48	3.27	-0.0185	26.48	3.21793
26.76	3.28	-0.0123	26.76	3.27282
27.11	3.35	-0.00772	27.11	3.32772
27.48	3.37	-0.00772	27.48	3.38403
27.76	3.41	-0.0123	27.76	3.44026
28.11	3.43	-0.0139	28.11	3.49636
28.39	3.45	-0.017	28.39	3.55124
28.77	3.53	-0.0201	28.77	3.60621
29.08	3.56	-0.0154	29.08	3.65898
29.45	3.62	-0.00926	29.45	3.71123
29.67	3.73	-0.0139	29.67	3.76318
30.05	3.76	-0.0185	30.05	3.81343
30.36	3.84	-0.0108	30.36	3.86341
30.64	3.92	-0.0201	30.64	3.9141
30.99	4.01	-0.0108	30.99	3.9651
31.24	4.09	-0.00772	31.24	4.01741
31.68	4.19	-0.00309	31.68	4.07096
31.93	4.22	-0.00617	31.93	4.12471
32.3	4.26	-0.0108	32.3	4.18015
32.65	4.33	-0.00463	32.65	4.23761
32.93	4.36	-0.00617	32.93	4.29276
33.24	4.38	-0.00925	33.24	4.34872
33.52	4.43	0.00308	33.52	4.40734
33.93	4.43	0.00617	33.93	4.46645
34.18	4.48	-0.00616	34.18	4.52501
34.52	4.54	0.00617	34.52	4.58446
34.9	4.56	3.41e-06	34.9	4.64363
35.15	4.64	0.00309	35.15	4.70206
35.49	4.69	0.0108	35.49	4.76143
35.78	4.73	-0.00308	35.78	4.82501
36.09	4.8	0.00771	36.09	4.88425
36.5	4.89	0.00926	36.5	4.93859
36.72	4.96	0.00463	36.72	4.99125
37.06	5.07	5.12e-06	37.06	5.04656
37.44	5.12	0.00926	37.44	5.10138
37.69	5.2	0.0231	37.69	5.15649
38.09	5.3	0.0154	38.09	5.2143
38.41	5.36	0.00772	38.41	5.2718
38.66	5.39	0.0108	38.66	5.33118
39.06	5.45	0.017	39.06	5.39099
39.38	5.51	0.0231	39.38	5.45282
39.69	5.52	0.0216	39.69	5.51637
40	5.58	0.0231	40	5.58121
40.31	5.61	0.0216	40.31	5.64512
40.69	5.64	0.0185	40.69	5.70895
41	5.75	0.0247	41	5.77278
41.29	5.82	0.0124	41.29	5.8353
41.6	5.89	0.0201	41.6	5.8968
41.88	5.94	0.0154	41.88	5.95785
42.22	6.01	0.0185	42.22	6.01588
42.63	6.07	0.0231	42.63	6.07544
42.88	6.14	0.0293	42.88	6.1344
43.19	6.2	0.0216	43.19	6.19193
43.57	6.26	0.0278	43.57	6.25118
43.79	6.14	0.0309	43.79	6.31006
44.16	6.32	0.0355	44.16	6.3693
44.54	6.52	0.0324	44.54	6.42987
44.88	6.62	0.0324	44.88	6.49143
45.17	6.63	0.034	45.17	6.55455
45.42	6.69	0.0355	45.42	6.6195
45.79	6.75	0.0386	45.79	6.68483
46.11	6.78	0.0463	46.11	6.75159
46.45	6.83	0.0525	46.45	6.8185
46.79	6.85	0.0401	46.79	6.88604
47.17	6.92	0.0386	47.17	6.95266
47.42	6.95	0.0432	47.42	7.01841
47.76	6.98	0.037	47.76	7.08401
48.05	7.05	0.0417	48.05	7.14742
48.39	7.13	0.0401	48.39	7.20988
48.67	7.19	0.0478	48.67	7.27119
49.02	7.28	0.0478	49.02	7.33234
49.27	7.38	0.0448	49.27	7.39402
49.64	7.46	0.0617	49.64	7.45623
49.96	7.55	0.0556	49.96	7.51961
50.24	7.68	0.0525	50.24	7.58269
50.61	7.7	0.0478	50.61	7.64775
50.93	7.8	0.0633	50.93	7.71321
51.3	7.89	0.0633	51.3	7.7807
51.58	7.93	0.0602	51.58	7.84939
51.9	8.01	0.0648	51.9	7.91826
52.27	8.05	0.0633	52.27	7.98168
52.52	8.08	0.0571	52.52	8.04924
52.93	8.14	0.0648	52.93	8.11874
53.21	8.16	0.0664	53.21	8.19051
53.49	8.21	0.0679	53.49	8.26037
53.84	8.25	0.0679	53.84	8.33034
54.18	8.28	0.0633	54.18	8.3988
54.53	8.38	0.071	54.53	8.46593
54.78	8.43	0.0695	54.78	8.53235
55.15	8.5	0.0787	55.15	8.59717
55.5	8.6	0.0772	55.5	8.66457
55.81	8.68	0.0741	55.81	8.72753
56.12	8.78	0.0756	56.12	8.78922
56.43	8.89	0.0818	56.43	8.85618
56.78	8.98	0.0818	56.78	8.92242
57.09	9.03	0.0926	57.09	8.98752
57.4	9.14	0.0972	57.4	9.05523
57.72	9.22	0.0972	57.72	9.12294
58.03	9.28	0.0957	58.03	9.19301
58.31	9.37	0.0864	58.31	9.26278
58.69	9.4	0.0895	58.69	9.33388
59	9.47	0.0957	59	9.40328
59.35	9.49	0.102	59.35	9.47615
59.72	9.52	0.113	59.72	9.5493
60	9.58	0.0972	60	9.62411
60.25	9.63	0.103	60.25	9.69867
60.66	9.64	0.103	60.66	9.77196
60.94	9.77	0.102	60.94	9.84369
61.29	9.81	0.11	61.29	9.91477
61.57	9.9	0.116	61.57	9.98403
61.82	9.97	0.114	61.82	10.0523
62.23	10.1	0.122	62.23	10.1193
62.54	10.2	0.117	62.54	10.1847
62.82	10.3	0.108	62.82	10.2506
63.2	10.4	0.114	63.2	10.3183
63.48	10.4	0.119	63.48	10.3853
63.76	10.6	0.127	63.76	10.4553
64.17	10.7	0.128	64.17	10.5248
64.51	10.6	0.128	64.51	10.5973
64.79	10.7	0.127	64.79	10.6701
65.14	10.8	0.131	65.14	10.743
65.42	10.8	0.131	65.42	10.8178
65.67	10.9	0.137	65.67	10.893
66.11	10.9	0.139	66.11	10.9709
66.45	11	0.133	66.45	11.0478
66.73	11.1	0.139	66.73	11.1248
67.01	11.2	0.13	67.01	11.2002
67.33	11.2	0.142	67.33	11.2753
67.7	11.3	0.134	67.7	11.3486
68.02	11.3	0.151	68.02	11.4203
68.36	11.4	0.148	68.36	11.4913
68.7	11.5	0.147	68.7	11.5613
68.95	11.6	0.148	68.95	11.6289
69.36	11.7	0.153	69.36	11.6979
69.67	11.8	0.154	69.67	11.7684
69.92	11.9	0.16	69.92	11.8387
70.3	12	0.154	70.3	11.9083
70.64	12.1	0.159	70.64	11.9821
70.83	12.2	0.167	70.83	12.0588
71.21	12.2	0.184	71.21	12.1356
71.52	12.3	0.182	71.52	12.2128
71.93	12.3	0.174	71.93	12.2901
72.18	12.4	0.181	72.18	12.3705
72.49	12.4	0.179	72.49	12.4543
72.8	12.5	0.177	72.8	12.5349
73.12	12.6	0.185	73.12	12.6174
73.52	12.6	0.182	73.52	12.7014
73.74	12.7	0.182	73.74	12.7837
74.12	12.7	0.181	74.12	12.8666
74.49	12.8	0.198	74.49	12.9467
74.78	12.9	0.184	74.78	13.0266
75.12	13	0.19	75.12	13.1061
75.34	13.1	0.188	75.34	13.1851
75.78	13.2	0.194	75.78	13.2602
76	13.3	0.202	76	13.3339
76.4	13.4	0.204	76.4	13.4031
76.69	13.5	0.207	76.69	13.4702
77.09	13.6	0.211	77.09	13.5352
77.31	13.7	0.21	77.31	13.598
77.62	13.7	0.219	77.62	13.6587
78.03	13.8	0.221	78.03	13.7173
78.28	13.9	0.222	78.28	13.7737
78.63	13.9	0.224	78.63	13.8282
78.97	13.9	0.23	78.97	13.8806
79.35	14	0.225	79.35	13.9312
79.63	14.1	0.236	79.63	13.9768
79.97	14.1	0.227	79.97	14.0202
80.29	14.2	0.23	80.29	14.0583

## Sheet: Fig. 4D
Currents (in nA) as a function of voltage with the indicated extracellular anion in a representative cell
The trace for chloride was notch filtered to remove line noise in Fig. 4D. Filtered and unfiltered data are given.
Voltage (mV)	Cl-	Gluc-	Voltage (mV)	Cl- (filtered)
-80.03	-0.426	-0.0509	-80.03	-0.42925
-79.78	-0.438	-0.0463	-79.78	-0.43106
-79.44	-0.42	-0.0478	-79.44	-0.431936
-79.1	-0.434	-0.0556	-79.1	-0.43319
-78.78	-0.434	-0.0556	-78.78	-0.434572
-78.47	-0.437	-0.0463	-78.47	-0.436395
-78.16	-0.42	-0.0478	-78.16	-0.438907
-77.78	-0.443	-0.0509	-77.78	-0.440271
-77.53	-0.438	-0.0463	-77.53	-0.441994
-77.25	-0.441	-0.0509	-77.25	-0.44442
-76.87	-0.475	-0.0556	-76.87	-0.446445
-76.56	-0.465	-0.0509	-76.56	-0.449523
-76.25	-0.455	-0.0463	-76.25	-0.451888
-75.9	-0.465	-0.0478	-75.9	-0.454366
-75.53	-0.451	-0.0586	-75.53	-0.457312
-75.31	-0.444	-0.0571	-75.31	-0.460134
-74.9	-0.448	-0.0448	-74.9	-0.463275
-74.56	-0.472	-0.0494	-74.56	-0.467473
-74.24	-0.472	-0.0494	-74.24	-0.471109
-73.96	-0.477	-0.0494	-73.96	-0.476089
-73.62	-0.475	-0.0463	-73.62	-0.481185
-73.31	-0.465	-0.0432	-73.31	-0.484991
-73.02	-0.495	-0.0386	-73.02	-0.488155
-72.68	-0.498	-0.0463	-72.68	-0.493019
-72.34	-0.492	-0.0448	-72.34	-0.49686
-72.08	-0.509	-0.0401	-72.08	-0.500714
-71.65	-0.495	-0.0432	-71.65	-0.506847
-71.3	-0.517	-0.0448	-71.3	-0.513389
-71.02	-0.525	-0.0463	-71.02	-0.517449
-70.77	-0.525	-0.0417	-70.77	-0.521376
-70.46	-0.537	-0.0463	-70.46	-0.524213
-70.05	-0.54	-0.0463	-70.05	-0.527231
-69.83	-0.54	-0.037	-69.83	-0.529728
-69.46	-0.54	-0.0525	-69.46	-0.534088
-69.08	-0.528	-0.0602	-69.08	-0.537867
-68.77	-0.525	-0.0494	-68.77	-0.541459
-68.42	-0.557	-0.0478	-68.42	-0.546042
-68.2	-0.556	-0.0355	-68.2	-0.548618
-67.86	-0.543	-0.0401	-67.86	-0.553279
-67.55	-0.559	-0.0478	-67.55	-0.559038
-67.17	-0.562	-0.0463	-67.17	-0.56511
-66.95	-0.552	-0.0401	-66.95	-0.570614
-66.58	-0.534	-0.0401	-66.58	-0.575814
-66.26	-0.574	-0.0448	-66.26	-0.581381
-65.82	-0.593	-0.0401	-65.82	-0.587286
-65.51	-0.61	-0.0386	-65.51	-0.592908
-65.17	-0.603	-0.0494	-65.17	-0.599938
-64.89	-0.619	-0.037	-64.89	-0.605458
-64.6	-0.608	-0.0309	-64.6	-0.611584
-64.35	-0.625	-0.0339	-64.35	-0.617164
-63.88	-0.642	-0.0263	-63.88	-0.621844
-63.63	-0.625	-0.0633	-63.63	-0.625748
-63.32	-0.659	-0.0664	-63.32	-0.631235
-63.04	-0.653	-0.0417	-63.04	-0.636574
-62.66	-0.639	-0.0401	-62.66	-0.640707
-62.29	-0.624	-0.0401	-62.29	-0.645509
-62.01	-0.651	-0.0386	-62.01	-0.651039
-61.79	-0.642	-0.0324	-61.79	-0.655901
-61.44	-0.654	-0.0432	-61.44	-0.659704
-61.16	-0.657	-0.0417	-61.16	-0.665068
-60.79	-0.665	-0.037	-60.79	-0.67079
-60.44	-0.648	-0.0478	-60.44	-0.67712
-60.1	-0.685	-0.0293	-60.1	-0.683116
-59.75	-0.678	-0.034	-59.75	-0.689416
-59.5	-0.693	-0.037	-59.5	-0.694945
-59.16	-0.702	-0.034	-59.16	-0.700648
-58.75	-0.715	-0.0432	-58.75	-0.706823
-58.53	-0.718	-0.0386	-58.53	-0.712081
-58.12	-0.727	-0.0247	-58.12	-0.718127
-57.94	-0.744	-0.0309	-57.94	-0.724257
-57.56	-0.752	-0.034	-57.56	-0.729353
-57.25	-0.745	-0.0309	-57.25	-0.733889
-56.94	-0.748	-0.0324	-56.94	-0.737633
-56.5	-0.742	-0.0324	-56.5	-0.740886
-56.22	-0.738	-0.0262	-56.22	-0.744316
-55.97	-0.744	-0.0278	-55.97	-0.747689
-55.62	-0.747	-0.0262	-55.62	-0.751206
-55.34	-0.744	-0.0278	-55.34	-0.753751
-54.99	-0.75	-0.037	-54.99	-0.758021
-54.65	-0.75	-0.0324	-54.65	-0.762169
-54.27	-0.758	-0.0401	-54.27	-0.765999
-54.02	-0.765	-0.0278	-54.02	-0.77044
-53.71	-0.765	-0.0124	-53.71	-0.775294
-53.3	-0.784	-0.0324	-53.3	-0.780516
-52.99	-0.782	-0.0031	-52.99	-0.785486
-52.71	-0.79	-0.0216	-52.71	-0.791987
-52.43	-0.779	-0.0108	-52.43	-0.798856
-52.08	-0.818	-0.0339	-52.08	-0.805317
-51.68	-0.821	-0.0324	-51.68	-0.812065
-51.43	-0.83	-0.0355	-51.43	-0.818492
-51.11	-0.836	-0.0247	-51.11	-0.824401
-50.71	-0.843	-0.0417	-50.71	-0.830277
-50.46	-0.844	-0.0309	-50.46	-0.835192
-50.08	-0.843	-0.0432	-50.08	-0.840737
-49.8	-0.836	-0.0401	-49.8	-0.844777
-49.49	-0.855	-0.0278	-49.49	-0.848425
-49.17	-0.852	-0.0262	-49.17	-0.852983
-48.83	-0.858	-0.0232	-48.83	-0.857334
-48.52	-0.855	-0.0262	-48.52	-0.860901
-48.23	-0.872	-0.0232	-48.23	-0.865714
-47.86	-0.863	-0.0247	-47.86	-0.871153
-47.55	-0.87	-0.0309	-47.55	-0.875883
-47.26	-0.878	-0.00927	-47.26	-0.880379
-46.92	-0.88	-0.0262	-46.92	-0.887302
-46.61	-0.883	-0.0201	-46.61	-0.892807
-46.26	-0.889	-0.0201	-46.26	-0.899632
-45.92	-0.894	-0.0262	-45.92	-0.905866
-45.57	-0.918	-0.0201	-45.57	-0.912709
-45.29	-0.901	-0.0278	-45.29	-0.919334
-44.95	-0.937	-0.0232	-44.95	-0.925646
-44.67	-0.949	-0.0262	-44.67	-0.931517
-44.38	-0.94	-0.0247	-44.38	-0.937028
-44.07	-0.952	-0.0201	-44.07	-0.942537
-43.7	-0.971	-0.0231	-43.7	-0.948338
-43.35	-0.969	-0.0216	-43.35	-0.953441
-43.01	-0.955	-0.0324	-43.01	-0.958911
-42.72	-0.977	-0.0247	-42.72	-0.963118
-42.41	-0.968	-0.0201	-42.41	-0.967762
-42.13	-0.951	-0.0185	-42.13	-0.972408
-41.72	-0.983	-0.0216	-41.72	-0.977625
-41.47	-0.966	-0.0201	-41.47	-0.98193
-41.13	-0.985	-0.0231	-41.13	-0.986887
-40.75	-0.982	-0.0201	-40.75	-0.991782
-40.5	-0.989	-0.0185	-40.5	-0.998003
-40.13	-0.995	-0.0139	-40.13	-1.00207
-39.81	-0.994	-0.0154	-39.81	-1.00727
-39.5	-1.02	-0.0216	-39.5	-1.01321
-39.13	-1.02	-0.0247	-39.13	-1.01957
-38.88	-1.02	-0.0154	-38.88	-1.02572
-38.56	-1.03	-0.0154	-38.56	-1.0331
-38.19	-1.04	-0.0154	-38.19	-1.04014
-37.9	-1.06	-0.0278	-37.9	-1.04562
-37.53	-1.06	-0.0139	-37.53	-1.05099
-37.25	-1.07	-0.0216	-37.25	-1.05584
-36.93	-1.06	-0.0185	-36.93	-1.05903
-36.59	-1.08	-0.0201	-36.59	-1.06307
-36.25	-1.07	-0.0124	-36.25	-1.06611
-36	-1.07	-0.017	-36	-1.06936
-35.62	-1.06	-0.0154	-35.62	-1.07229
-35.34	-1.08	-0.017	-35.34	-1.07568
-34.96	-1.09	-0.0231	-34.96	-1.07889
-34.65	-1.09	-0.0201	-34.65	-1.08189
-34.31	-1.07	-0.00464	-34.31	-1.08553
-33.99	-1.08	-0.017	-33.99	-1.08822
-33.68	-1.07	-0.0139	-33.68	-1.09084
-33.43	-1.07	-0.00926	-33.43	-1.09249
-33.02	-1.08	-0.0108	-33.02	-1.09435
-32.74	-1.1	-0.0139	-32.74	-1.09747
-32.43	-1.1	-0.00926	-32.43	-1.10081
-32.08	-1.11	-0.0123	-32.08	-1.10431
-31.77	-1.12	-0.00772	-31.77	-1.10655
-31.46	-1.12	-0.0154	-31.46	-1.11
-31.11	-1.13	-0.0154	-31.11	-1.11225
-30.77	-1.13	-0.017	-30.77	-1.11382
-30.49	-1.12	-0.0139	-30.49	-1.11465
-30.14	-1.12	0.00308	-30.14	-1.11581
-29.86	-1.11	-0.0108	-29.86	-1.11754
-29.58	-1.11	-0.00926	-29.58	-1.11981
-29.2	-1.12	-0.00926	-29.2	-1.12044
-28.86	-1.11	-0.00617	-28.86	-1.12175
-28.55	-1.13	-0.00772	-28.55	-1.12294
-28.17	-1.13	-0.0185	-28.17	-1.12245
-27.92	-1.12	-0.0139	-27.92	-1.12273
-27.61	-1.11	-0.00617	-27.61	-1.12375
-27.23	-1.11	-0.00309	-27.23	-1.12413
-26.92	-1.12	-0.00771	-26.92	-1.12524
-26.64	-1.11	-0.00617	-26.64	-1.12615
-26.23	-1.12	-0.00618	-26.23	-1.12608
-25.98	-1.13	-0.0123	-25.98	-1.127
-25.67	-1.13	-1.25e-05	-25.67	-1.12743
-25.32	-1.14	-0.0216	-25.32	-1.12729
-24.98	-1.14	-0.0247	-24.98	-1.12605
-24.73	-1.13	-0.0154	-24.73	-1.12337
-24.35	-1.14	-0.00155	-24.35	-1.12066
-24.01	-1.13	-0.00617	-24.01	-1.11755
-23.73	-1.11	-0.0108	-23.73	-1.11408
-23.32	-1.13	-0.00926	-23.32	-1.11127
-23.04	-1.11	-0.00155	-23.04	-1.10959
-22.76	-1.1	-0.00617	-22.76	-1.10563
-22.38	-1.1	-0.00926	-22.38	-1.1014
-22.13	-1.08	-0.0123	-22.13	-1.0972
-21.79	-1.08	0.00925	-21.79	-1.09432
-21.47	-1.09	-0.0077	-21.47	-1.09019
-21.13	-1.07	0.0123	-21.13	-1.0869
-20.85	-1.07	0.00463	-20.85	-1.08348
-20.47	-1.06	-0.00154	-20.47	-1.08
-20.22	-1.07	-0.00617	-20.22	-1.07653
-19.84	-1.08	-0.00771	-19.84	-1.07424
-19.44	-1.07	-0.00155	-19.44	-1.07044
-19.16	-1.08	-0.00309	-19.16	-1.06721
-18.87	-1.07	-0.00617	-18.87	-1.06311
-18.53	-1.07	-0.00309	-18.53	-1.05742
-18.28	-1.04	-0.00926	-18.28	-1.05176
-17.87	-1.07	-0.017	-17.87	-1.04476
-17.53	-1.06	-0.00772	-17.53	-1.03709
-17.28	-1.05	-0.00155	-17.28	-1.02871
-16.96	-1.02	-0.00308	-16.96	-1.01921
-16.59	-1.02	0.00771	-16.59	-1.00957
-16.28	-0.995	-0.00308	-16.28	-1.0008
-15.99	-0.991	-0.00309	-15.99	-0.991437
-15.62	-0.977	-3.41e-06	-15.62	-0.981988
-15.4	-0.974	-0.00617	-15.4	-0.971971
-15.06	-0.935	-0.00771	-15.06	-0.962992
-14.77	-0.938	0.00617	-14.77	-0.954113
-14.43	-0.92	0.00155	-14.43	-0.945211
-14.05	-0.912	0.00926	-14.05	-0.93671
-13.8	-0.906	0.00463	-13.8	-0.927838
-13.49	-0.911	-0.00308	-13.49	-0.918836
-13.05	-0.909	-0.00463	-13.05	-0.908981
-12.77	-0.901	-0.00617	-12.77	-0.89931
-12.46	-0.906	-1.71e-06	-12.46	-0.889453
-12.18	-0.9	0.00154	-12.18	-0.878255
-11.8	-0.892	0.00154	-11.8	-0.865455
-11.42	-0.875	0.00462	-11.42	-0.851914
-11.14	-0.855	-0.00925	-11.14	-0.836257
-10.89	-0.84	0.00463	-10.89	-0.820533
-10.55	-0.823	0.0123	-10.55	-0.804456
-10.17	-0.79	0.00772	-10.17	-0.787448
-9.89	-0.778	5.12e-06	-9.89	-0.769474
-9.61	-0.748	0.00617	-9.61	-0.752168
-9.23	-0.728	0.00309	-9.23	-0.734149
-8.89	-0.704	6.26e-06	-8.89	-0.71601
-8.61	-0.684	0.0139	-8.61	-0.698072
-8.2	-0.642	0.0108	-8.2	-0.68054
-7.95	-0.64	0.00772	-7.95	-0.663321
-7.67	-0.613	0.0123	-7.67	-0.646332
-7.32	-0.611	0.0154	-7.32	-0.629971
-7.01	-0.594	0.00618	-7.01	-0.614219
-6.67	-0.59	0.0108	-6.67	-0.599289
-6.39	-0.594	0.0108	-6.39	-0.582929
-6.01	-0.579	0.00926	-6.01	-0.565607
-5.7	-0.56	0.00155	-5.7	-0.54846
-5.41	-0.568	0.00463	-5.41	-0.529693
-5.04	-0.539	0.00617	-5.04	-0.509354
-4.79	-0.512	-0.00154	-4.79	-0.488498
-4.41	-0.491	0.00463	-4.41	-0.466488
-4.07	-0.465	0.00617	-4.07	-0.444231
-3.76	-0.432	0.00771	-3.76	-0.421116
-3.44	-0.406	0.00309	-3.44	-0.398359
-3.07	-0.377	0.00926	-3.07	-0.374616
-2.79	-0.343	0.017	-2.79	-0.3507
-2.41	-0.315	1.02e-05	-2.41	-0.326468
-2.13	-0.278	0.0108	-2.13	-0.302861
-1.82	-0.232	0.0154	-1.82	-0.279256
-1.5	-0.224	0.00772	-1.5	-0.255366
-1.19	-0.207	0.0108	-1.19	-0.232983
-0.87641	-0.171	0.0231	-0.87641	-0.211168
-0.50081	-0.173	1.19e-05	-0.50081	-0.188592
-0.1878	-0.162	0.00925	-0.1878	-0.167323
0.125201	-0.153	0.00155	0.125201	-0.144644
0.375604	-0.142	0.0139	0.375604	-0.12118
0.719908	-0.122	0.00309	0.719908	-0.0969609
0.970311	-0.111	0.00772	0.970311	-0.0725018
1.35	-0.0772	0.0139	1.35	-0.0453577
1.72	-0.0401	0.0123	1.72	-0.017213
2.03	-0.0231	0.00309	2.03	0.0112805
2.35	0.017	0.00618	2.35	0.0404707
2.72	0.0556	0.0216	2.72	0.0702365
2.94	0.0988	0.0124	2.94	0.101297
3.29	0.123	0.0139	3.29	0.132675
3.63	0.173	0.017	3.63	0.163371
3.98	0.225	0.00618	3.98	0.194759
4.23	0.256	0.017	4.23	0.225904
4.57	0.299	0.017	4.57	0.255964
4.91	0.319	0.0216	4.91	0.285697
5.23	0.349	0.0216	5.23	0.314611
5.51	0.372	0.0108	5.51	0.342972
5.92	0.41	0.0108	5.92	0.370783
6.2	0.401	0.0139	6.2	0.398305
6.51	0.412	0.0185	6.51	0.426359
6.85	0.437	0.0139	6.85	0.455074
7.14	0.461	0.0293	7.14	0.484175
7.51	0.482	0.0031	7.51	0.515837
7.83	0.497	0.0154	7.83	0.548307
8.2	0.549	0.0139	8.2	0.582686
8.45	0.591	0.0123	8.45	0.616885
8.73	0.611	0.00926	8.73	0.65178
9.14	0.674	0.017	9.14	0.689107
9.39	0.722	0.0201	9.39	0.726029
9.7	0.765	0.0201	9.7	0.764734
10.11	0.815	0.0154	10.11	0.8027
10.45	0.86	0.0139	10.45	0.840589
10.7	0.914	0.0216	10.7	0.877826
10.99	0.952	0.0201	10.99	0.915092
11.3	0.994	0.0185	11.3	0.950733
11.64	1.04	0.0247	11.64	0.985519
11.99	1.07	0.0231	11.99	1.02138
12.33	1.07	0.0139	12.33	1.05626
12.65	1.1	0.0139	12.65	1.09143
12.96	1.11	0.0185	12.96	1.12582
13.37	1.14	0.0185	13.37	1.1604
13.55	1.18	0.0201	13.55	1.19805
13.96	1.19	0.0185	13.96	1.23403
14.18	1.24	0.0108	14.18	1.27412
14.52	1.26	0.00772	14.52	1.3162
14.9	1.31	0.0262	14.9	1.35804
15.21	1.36	0.0185	15.21	1.40148
15.59	1.42	0.0309	15.59	1.44611
15.87	1.49	0.0232	15.87	1.49025
16.21	1.55	0.0185	16.21	1.53536
16.43	1.61	0.0201	16.43	1.58114
16.84	1.64	0.0262	16.84	1.62626
17.18	1.71	0.0262	17.18	1.67181
17.4	1.75	0.0355	17.4	1.7165
17.75	1.8	0.0247	17.75	1.76014
18.12	1.87	0.0231	18.12	1.80144
18.37	1.87	0.0232	18.37	1.84277
18.72	1.94	0.0324	18.72	1.88289
19.09	1.93	0.0324	19.09	1.92192
19.31	1.94	0.0293	19.31	1.96251
19.78	1.99	0.0262	19.78	2.00328
20.09	2.01	0.0386	20.09	2.04438
20.31	2.03	0.0185	20.31	2.0875
20.69	2.1	-0.00307	20.69	2.13063
21.03	2.13	0.0201	21.03	2.17677
21.38	2.17	0.0201	21.38	2.2244
21.66	2.25	0.00773	21.66	2.27352
21.97	2.3	0.0309	21.97	2.32249
22.25	2.34	0.0201	22.25	2.37153
22.6	2.41	0.0324	22.6	2.4206
22.94	2.49	0.0247	22.94	2.47153
23.26	2.54	0.0309	23.26	2.52236
23.57	2.63	0.0401	23.57	2.57025
23.85	2.69	0.0355	23.85	2.61998
24.26	2.73	0.037	24.26	2.66857
24.54	2.76	0.037	24.54	2.71546
24.85	2.81	0.0262	24.85	2.76342
25.2	2.82	0.0262	25.2	2.80992
25.48	2.88	0.0309	25.48	2.8519
25.85	2.89	0.0309	25.85	2.89869
26.23	2.92	0.0247	26.23	2.94541
26.48	2.95	0.017	26.48	2.99301
26.76	2.98	0.0293	26.76	3.0436
27.11	3.05	0.0108	27.11	3.09417
27.48	3.1	0.0355	27.48	3.14536
27.76	3.12	0.0247	27.76	3.1982
28.11	3.21	0.034	28.11	3.25148
28.39	3.3	0.0478	28.39	3.3054
28.77	3.37	0.0355	28.77	3.36074
29.08	3.42	0.0355	29.08	3.41709
29.45	3.49	0.034	29.45	3.47275
29.67	3.54	0.0293	29.67	3.52902
30.05	3.61	0.0386	30.05	3.58443
30.36	3.75	0.0417	30.36	3.63763
30.64	3.75	0.0401	30.64	3.6903
30.99	3.8	0.034	30.99	3.74034
31.24	3.83	0.0324	31.24	3.78915
31.68	3.85	0.034	31.68	3.83796
31.93	3.9	0.0447	31.93	3.88501
32.3	3.92	0.0401	32.3	3.93329
32.65	3.94	0.0355	32.65	3.98231
32.93	4	0.0463	32.93	4.03095
33.24	4.03	0.0386	33.24	4.08131
33.52	4.09	0.0355	33.52	4.13505
33.93	4.14	0.0463	33.93	4.19063
34.18	4.21	0.034	34.18	4.24518
34.52	4.24	0.0386	34.52	4.30289
34.9	4.32	0.0478	34.9	4.36089
35.15	4.39	0.0463	35.15	4.41913
35.49	4.48	0.0432	35.49	4.48067
35.78	4.57	0.0432	35.78	4.5399
36.09	4.65	0.0602	36.09	4.59876
36.5	4.7	0.0586	36.5	4.65735
36.72	4.78	0.0494	36.72	4.71446
37.06	4.84	0.0463	37.06	4.77069
37.44	4.89	0.0478	37.44	4.82436
37.69	4.92	0.0401	37.69	4.87719
38.09	4.97	0.037	38.09	4.93002
38.41	4.99	0.0494	38.41	4.98146
38.66	5.02	0.0525	38.66	5.03383
39.06	5.09	0.0432	39.06	5.08732
39.38	5.09	0.0556	39.38	5.14298
39.69	5.12	0.0463	39.69	5.19699
40	5.17	0.037	40	5.25209
40.31	5.25	0.037	40.31	5.30951
40.69	5.32	0.0448	40.69	5.36778
41	5.4	0.0509	41	5.42828
41.29	5.46	0.0509	41.29	5.49155
41.6	5.53	0.0432	41.6	5.55455
41.88	5.62	0.054	41.88	5.61765
42.22	5.72	0.0448	42.22	5.68135
42.63	5.78	0.0556	42.63	5.74529
42.88	5.86	0.0556	42.88	5.80673
43.19	5.94	0.0725	43.19	5.86791
43.57	6	0.0617	43.57	5.92696
43.79	6.04	0.0509	43.79	5.98266
44.16	6.07	0.0663	44.16	6.04153
44.54	6.13	0.0371	44.54	6.09693
44.88	6.18	0.0525	44.88	6.15174
45.17	6.19	0.0525	45.17	6.20643
45.42	6.25	0.0509	45.42	6.26195
45.79	6.29	0.0556	45.79	6.31885
46.11	6.31	0.0586	46.11	6.37834
46.45	6.36	0.0263	46.45	6.43821
46.79	6.44	0.0478	46.79	6.49958
47.17	6.5	0.054	47.17	6.56281
47.42	6.56	0.0633	47.42	6.62738
47.76	6.66	0.0586	47.76	6.69428
48.05	6.74	0.0633	48.05	6.75984
48.39	6.83	0.0571	48.39	6.82765
48.67	6.96	0.0602	48.67	6.89557
49.02	7	0.0479	49.02	6.96366
49.27	7.1	0.0725	49.27	7.02983
49.64	7.16	0.0617	49.64	7.09657
49.96	7.22	0.0617	49.96	7.16221
50.24	7.29	0.0617	50.24	7.22239
50.61	7.34	0.0633	50.61	7.28664
50.93	7.37	0.054	50.93	7.34917
51.3	7.42	0.0617	51.3	7.4093
51.58	7.45	0.071	51.58	7.4699
51.9	7.49	0.0695	51.9	7.53162
52.27	7.56	0.0787	52.27	7.5917
52.52	7.57	0.0679	52.52	7.65453
52.93	7.68	0.0679	52.93	7.71951
53.21	7.73	0.0417	53.21	7.78683
53.49	7.81	0.0586	53.49	7.85519
53.84	7.87	0.0617	53.84	7.92324
54.18	7.96	0.0741	54.18	7.99412
54.53	8.03	0.071	54.53	8.06675
54.78	8.13	0.0648	54.78	8.13769
55.15	8.29	0.0617	55.15	8.20781
55.5	8.3	0.0633	55.5	8.27837
55.81	8.4	0.0756	55.81	8.34726
56.12	8.49	0.0802	56.12	8.41209
56.43	8.54	0.0741	56.43	8.47867
56.78	8.6	0.0725	56.78	8.54276
57.09	8.7	0.0818	57.09	8.60564
57.4	8.7	0.0633	57.4	8.66705
57.72	8.74	0.0741	57.72	8.7268
58.03	8.75	0.071	58.03	8.78897
58.31	8.79	0.0725	58.31	8.85195
58.69	8.92	0.0787	58.69	8.91623
59	8.9	0.0772	59	8.97803
59.35	8.95	0.0818	59.35	9.04398
59.72	9.04	0.0849	59.72	9.11219
60	9.12	0.0679	60	9.17926
60.25	9.19	0.0849	60.25	9.25374
60.66	9.29	0.0864	60.66	9.32361
60.94	9.43	0.0756	60.94	9.39775
61.29	9.47	0.0741	61.29	9.47116
61.57	9.57	0.0818	61.57	9.54261
61.82	9.65	0.0756	61.82	9.61303
62.23	9.77	0.0833	62.23	9.68518
62.54	9.83	0.0787	62.54	9.7545
62.82	9.9	0.103	62.82	9.8227
63.2	9.94	0.0911	63.2	9.88809
63.48	9.99	0.0803	63.48	9.95593
63.76	10.1	0.088	63.76	10.0256
64.17	10.1	0.0864	64.17	10.09
64.51	10.1	0.0895	64.51	10.152
64.79	10.2	0.088	64.79	10.2139
65.14	10.2	0.0941	65.14	10.2799
65.42	10.3	0.0864	65.42	10.344
65.67	10.3	0.0972	65.67	10.4126
66.11	10.4	0.0787	66.11	10.4873
66.45	10.5	0.0849	66.45	10.5582
66.73	10.6	0.088	66.73	10.6331
67.01	10.7	0.0941	67.01	10.7061
67.33	10.8	0.0941	67.33	10.7802
67.7	10.9	0.0988	67.7	10.8577
68.02	11	0.0926	68.02	10.9339
68.36	11	0.0988	68.36	11.0076
68.7	11.1	0.0988	68.7	11.0797
68.95	11.2	0.108	68.95	11.1537
69.36	11.3	0.103	69.36	11.2246
69.67	11.4	0.105	69.67	11.2876
69.92	11.4	0.0957	69.92	11.3572
70.3	11.5	0.0988	70.3	11.423
70.64	11.5	0.108	70.64	11.4897
70.83	11.5	0.106	70.83	11.5525
71.21	11.6	0.0972	71.21	11.6159
71.52	11.6	0.12	71.52	11.6848
71.93	11.7	0.0911	71.93	11.7583
72.18	11.8	0.102	72.18	11.8314
72.49	11.8	0.102	72.49	11.905
72.8	11.9	0.113	72.8	11.9841
73.12	12	0.11	73.12	12.0679
73.52	12.1	0.119	73.52	12.1462
73.74	12.2	0.113	73.74	12.2238
74.12	12.3	0.117	74.12	12.306
74.49	12.5	0.113	74.49	12.3879
74.78	12.5	0.111	74.78	12.4707
75.12	12.6	0.125	75.12	12.5496
75.34	12.7	0.117	75.34	12.6256
75.78	12.8	0.123	75.78	12.7035
76	12.9	0.127	76	12.7811
76.4	12.9	0.123	76.4	12.8617
76.69	12.9	0.116	76.69	12.9389
77.09	13	0.119	77.09	13.0163
77.31	13.1	0.128	77.31	13.0932
77.62	13.1	0.131	77.62	13.1635
78.03	13.1	0.11	78.03	13.2309
78.28	13.2	0.128	78.28	13.295
78.63	13.3	0.128	78.63	13.3556
78.97	13.3	0.119	78.97	13.4125
79.35	13.4	0.12	79.35	13.4657
79.63	13.5	0.13	79.63	13.5209
79.97	13.6	0.127	79.97	13.5686
80.29	13.8	0.123	80.29	13.613

## Sheet: Fig. 4E
Percentage of block of ASOR currents by the indicated substances at +80 mV. Replicates are individual cells.
20 µM PS	100 µM PS	100 µM DIDS	100 µM NFA
81.9459	93.3643	69.9558	76.0445
81.252	89.4362	82.7995	86.269
76.6988	95.4425	86.2391	81.7296
82.9425	97.4465	73.7975	75.7186
82.9536	91.1476	73.5433	86.8285
			82.0555

## Sheet: Fig. 4F
Timecourse of block by 20 and 100 µM pregnenolone sulfate in one representative cell
Time (s)	Current density (pA/pF)
0	554.29
4.067	552.72
8.127	547.4
12.183	525.63
16.231	518.14
20.357	292.74
24.476	198.43
28.594	149.33
32.709	126.72
36.827	111.61
40.949	108.71
45.064	98.791
49.186	96.01
53.305	90.81
57.419	92.624
61.542	88.513
65.66	89.601
69.774	91.536
73.901	93.833
78.015	59.976
82.134	24.667
86.244	22.007
90.37	17.05
94.489	15.236
98.603	17.775
102.73	16.203
106.84	18.863
110.96	14.631
115.08	15.357
119.2	14.148
123.31	13.664
127.44	13.422
131.55	17.291
135.67	14.873
139.8	17.291
143.92	20.919
148.04	24.547
152.17	44.135
156.28	103.87
160.31	199.88
164.45	307.62
168.57	381.02
172.69	427.33
176.81	481.5
180.93	527.93
185.05	541.96
189.16	555.74
193.93	589.84
198.02	609.92
202.08	610.16
206.14	625.51
210.19	639.42
214.25	619.83
218.31	621.28
222.36	637.24
226.41	643.29
230.47	633.13
234.53	585.13
238.59	95.405
242.64	15.84
246.7	13.301
250.76	18.017
254.81	13.059
258.87	14.027
262.92	17.654
266.98	15.236
271.03	14.389
275.09	14.268
279.15	13.664
283.2	17.291
287.32
291.44
295.56
299.68
303.79
307.91
312.03
316.15
320.27
324.39
328.51
332.62
336.74
340.86
344.98

## Sheet: Fig. 4G
Currents (in nA) as a function of voltage with the indicated concentration of extracellular pregnenolone sulfate (PS)
Voltage (mV)	ctrl	20 µM PS	100 µM PS
-80.03	-0.24847	-0.19136	-0.09106
-79.78	-0.25001	-0.17903	-0.09259
-79.44	-0.23613	-0.18982	-0.07563
-79.1	-0.23613	-0.196	-0.08179
-78.78	-0.24538	-0.19908	-0.07717
-78.47	-0.24075	-0.18829	-0.08179
-78.16	-0.23921	-0.18982	-0.08488
-77.78	-0.23612	-0.18057	-0.08951
-77.53	-0.2315	-0.1821	-0.09568
-77.25	-0.23458	-0.16977	-0.10185
-76.87	-0.24538	-0.16976	-0.0926
-76.56	-0.25309	-0.16514	-0.09568
-76.25	-0.24231	-0.18056	-0.09106
-75.9	-0.27161	-0.18056	-0.09876
-75.53	-0.27162	-0.17594	-0.09105
-75.31	-0.26699	-0.18365	-0.07718
-74.9	-0.27007	-0.18828	-0.09413
-74.56	-0.25928	-0.17902	-0.08488
-74.24	-0.2747	-0.17131	-0.08026
-73.96	-0.26545	-0.17902	-0.09259
-73.62	-0.27932	-0.18211	-0.08488
-73.31	-0.26545	-0.18211	-0.08333
-73.02	-0.26082	-0.17902	-0.07254
-72.68	-0.25928	-0.1821	-0.07407
-72.34	-0.26853	-0.1636	-0.06791
-72.08	-0.27161	-0.17593	-0.06637
-71.65	-0.26545	-0.17439	-0.07562
-71.3	-0.2639	-0.16822	-0.07562
-71.02	-0.26544	-0.16822	-0.08179
-70.77	-0.24694	-0.16051	-0.08642
-70.46	-0.25927	-0.16667	-0.08797
-70.05	-0.26081	-0.1713	-0.09259
-69.83	-0.26082	-0.15897	-0.08488
-69.46	-0.27625	-0.17593	-0.08796
-69.08	-0.2855	-0.17285	-0.08179
-68.77	-0.28397	-0.18056	-0.07408
-68.42	-0.28705	-0.17902	-0.07408
-68.2	-0.27471	-0.16822	-0.08796
-67.86	-0.28242	-0.16051	-0.07717
-67.55	-0.28551	-0.16513	-0.07562
-67.17	-0.28088	-0.16822	-0.07099
-66.95	-0.27934	-0.1713	-0.06945
-66.58	-0.28088	-0.16822	-0.06328
-66.26	-0.28551	-0.17285	-0.05865
-65.82	-0.28242	-0.17593	-0.06327
-65.51	-0.27316	-0.16822	-0.05556
-65.17	-0.27162	-0.16975	-0.06173
-64.89	-0.2747	-0.15279	-0.07407
-64.6	-0.26854	-0.1497	-0.07716
-64.35	-0.27162	-0.14199	-0.07871
-63.88	-0.2747	-0.14199	-0.07871
-63.63	-0.27779	-0.15432	-0.08025
-63.32	-0.28705	-0.14662	-0.07716
-63.04	-0.30402	-0.15742	-0.07562
-62.66	-0.30557	-0.16976	-0.07408
-62.29	-0.30557	-0.16667	-0.0787
-62.01	-0.30557	-0.1605	-0.06945
-61.79	-0.30403	-0.1605	-0.07099
-61.44	-0.2994	-0.16204	-0.06945
-61.16	-0.2994	-0.1605	-0.06174
-60.79	-0.30403	-0.16667	-0.06636
-60.44	-0.31174	-0.16976	-0.05865
-60.1	-0.29786	-0.15588	-0.05555
-59.75	-0.3071	-0.1605	-0.04014
-59.5	-0.29015	-0.15433	-0.05247
-59.16	-0.29477	-0.14661	-0.05093
-58.75	-0.30865	-0.14199	-0.05556
-58.53	-0.29786	-0.14969	-0.06019
-58.12	-0.29785	-0.14353	-0.06482
-57.94	-0.29477	-0.14352	-0.07253
-57.56	-0.2994	-0.13582	-0.06791
-57.25	-0.30711	-0.14661	-0.06482
-56.94	-0.31637	-0.1497	-0.06173
-56.5	-0.32254	-0.14353	-0.06173
-56.22	-0.32255	-0.15124	-0.06327
-55.97	-0.33952	-0.15278	-0.05865
-55.62	-0.33644	-0.15279	-0.06327
-55.34	-0.33335	-0.15433	-0.06173
-54.99	-0.33489	-0.1497	-0.06481
-54.65	-0.33181	-0.1497	-0.05556
-54.27	-0.3318	-0.14353	-0.05555
-54.02	-0.32564	-0.14198	-0.0463
-53.71	-0.33489	-0.14199	-0.04938
-53.3	-0.33798	-0.15123	-0.04167
-52.99	-0.33335	-0.12656	-0.04938
-52.71	-0.33952	-0.13735	-0.0463
-52.43	-0.33798	-0.13735	-0.04939
-52.08	-0.32564	-0.13426	-0.05556
-51.68	-0.31792	-0.12501	-0.06944
-51.43	-0.31792	-0.13118	-0.06328
-51.11	-0.32717	-0.1281	-0.06636
-50.71	-0.32718	-0.13426	-0.05711
-50.46	-0.32719	-0.12502	-0.06481
-50.08	-0.35649	-0.14506	-0.05865
-49.8	-0.36267	-0.13582	-0.05402
-49.49	-0.36421	-0.14352	-0.06018
-49.17	-0.35496	-0.14506	-0.05247
-48.83	-0.34879	-0.13119	-0.04939
-48.52	-0.35341	-0.13427	-0.0571
-48.23	-0.3565	-0.13889	-0.0571
-47.86	-0.35804	-0.13427	-0.04322
-47.55	-0.34725	-0.13581	-0.04629
-47.26	-0.35495	-0.12656	-0.03396
-46.92	-0.35958	-0.13272	-0.04475
-46.61	-0.35958	-0.13118	-0.0355
-46.26	-0.3565	-0.13426	-0.04012
-45.92	-0.34416	-0.12655	-0.0355
-45.57	-0.34569	-0.11729	-0.0463
-45.29	-0.34261	-0.11266	-0.05247
-44.95	-0.34261	-0.1142	-0.05093
-44.67	-0.33335	-0.11883	-0.05864
-44.38	-0.33798	-0.11112	-0.0571
-44.07	-0.3457	-0.12038	-0.05093
-43.7	-0.36729	-0.13426	-0.0463
-43.35	-0.35959	-0.13426	-0.05092
-43.01	-0.36884	-0.12963	-0.04322
-42.72	-0.3673	-0.12038	-0.0463
-42.41	-0.37347	-0.13117	-0.0463
-42.13	-0.37193	-0.12501	-0.04938
-41.72	-0.37039	-0.12038	-0.04784
-41.47	-0.37039	-0.11883	-0.0463
-41.13	-0.36576	-0.11575	-0.04012
-40.75	-0.36268	-0.11884	-0.03087
-40.5	-0.37501	-0.12654	-0.03395
-40.13	-0.37193	-0.11421	-0.03087
-39.81	-0.36267	-0.11883	-0.02778
-39.5	-0.35804	-0.10803	-0.03087
-39.13	-0.34879	-0.10649	-0.03396
-38.88	-0.35033	-0.10649	-0.04784
-38.56	-0.35495	-0.10186	-0.04939
-38.19	-0.35496	-0.10186	-0.0571
-37.9	-0.36421	-0.09723	-0.06326
-37.53	-0.36885	-0.09723	-0.04168
-37.25	-0.38582	-0.11574	-0.04321
-36.93	-0.39353	-0.11729	-0.04938
-36.59	-0.39045	-0.12192	-0.03241
-36.25	-0.39199	-0.12192	-0.02779
-36	-0.38273	-0.11112	-0.0432
-35.62	-0.37194	-0.10649	-0.03858
-35.34	-0.37965	-0.10803	-0.02624
-34.96	-0.39044	-0.10186	-0.03858
-34.65	-0.37965	-0.10648	-0.03241
-34.31	-0.37348	-0.10494	-0.02315
-33.99	-0.3781	-0.10032	-0.0139
-33.68	-0.37811	-0.10648	-0.02623
-33.43	-0.37965	-0.10648	-0.02161
-33.02	-0.38427	-0.09415	-0.02623
-32.74	-0.36114	-0.1003	-0.02778
-32.43	-0.37347	-0.08026	-0.03087
-32.08	-0.3781	-0.08334	-0.04783
-31.77	-0.36113	-0.09105	-0.03859
-31.46	-0.35959	-0.08797	-0.04783
-31.11	-0.36268	-0.10031	-0.03087
-30.77	-0.37964	-0.09261	-0.03241
-30.49	-0.38428	-0.10802	-0.03549
-30.14	-0.38891	-0.09877	-0.0247
-29.86	-0.3889	-0.10185	-0.02624
-29.58	-0.37348	-0.09722	-0.03086
-29.2	-0.37502	-0.08334	-0.03241
-28.86	-0.38735	-0.08796	-0.03241
-28.55	-0.36885	-0.08489	-0.02778
-28.17	-0.37502	-0.09414	-0.02315
-27.92	-0.37347	-0.09414	-0.01235
-27.61	-0.37039	-0.08643	-0.01389
-27.23	-0.3781	-0.08489	-0.01389
-26.92	-0.37348	-0.10493	-0.01698
-26.64	-0.37501	-0.0926	-0.02006
-26.23	-0.36113	-0.08642	-0.0247
-25.98	-0.35342	-0.07562	-0.03703
-25.67	-0.35804	-0.07408	-0.02778
-25.32	-0.36113	-0.07871	-0.03395
-24.98	-0.36576	-0.08025	-0.02932
-24.73	-0.38273	-0.06945	-0.02778
-24.35	-0.38119	-0.07562	-0.02624
-24.01	-0.38119	-0.07717	-0.02932
-23.73	-0.38428	-0.09105	-0.02315
-23.32	-0.38119	-0.08643	-0.01852
-23.04	-0.3781	-0.08488	-0.02006
-22.76	-0.36885	-0.07717	-0.02006
-22.38	-0.3673	-0.08179	-0.01698
-22.13	-0.3673	-0.07408	-0.01389
-21.79	-0.3673	-0.07408	-0.01851
-21.47	-0.36422	-0.071	-0.00155
-21.13	-0.36113	-0.08333	-3.4e-06
-20.85	-0.34879	-0.07717	-0.00771
-20.47	-0.35804	-0.07407	-0.00463
-20.22	-0.35958	-0.06174	0.001536
-19.84	-0.34415	-0.06173	-0.01234
-19.44	-0.33181	-0.05248	-0.02006
-19.16	-0.3426	-0.05556	-0.01544
-18.87	-0.33798	-0.06173	-0.02777
-18.53	-0.33644	-0.05556	-0.02778
-18.28	-0.33644	-0.05093	-0.02007
-17.87	-0.3534	-0.06173	-0.02006
-17.53	-0.34107	-0.0679	-0.02314
-17.28	-0.35032	-0.06482	-0.01235
-16.96	-0.35341	-0.07253	-0.01697
-16.59	-0.34107	-0.05711	-0.00926
-16.28	-0.3349	-0.06172	-0.01388
-15.99	-0.33644	-0.04785	-0.00464
-15.62	-0.33489	-0.06018	-0.01234
-15.4	-0.31947	-0.05556	-0.00926
-15.06	-0.31792	-0.04785	0.003079
-14.77	-0.33179	-0.04939	-0.00616
-14.43	-0.31175	-0.0571	0.013874
-14.05	-0.31174	-0.05864	-0.00771
-13.8	-0.30557	-0.05556	-2.3e-06
-13.49	-0.28552	-0.05247	0.001535
-13.05	-0.28705	-0.04938	-0.01851
-12.77	-0.28705	-0.04167	-0.00772
-12.46	-0.28859	-0.03241	-0.01851
-12.18	-0.28242	-0.03704	-0.01697
-11.8	-0.2778	-0.04012	-0.00772
-11.42	-0.29322	-0.03242	-0.0108
-11.14	-0.28397	-0.04167	-0.00926
-10.89	-0.28396	-0.0463	-0.00772
-10.55	-0.28396	-0.04167	-0.00617
-10.17	-0.27471	-0.05246	-0.00772
-9.89	-0.27316	-0.02934	-0.00617
-9.61	-0.2747	-0.04475	-0.00771
-9.23	-0.26082	-0.0355	-0.00154
-8.89	-0.25464	-0.03858	0.012339
-8.61	-0.25156	-0.03396	0.00618
-8.2	-0.25309	-0.04166	0.018512
-7.95	-0.24075	-0.0355	0.010807
-7.67	-0.23149	-0.03241	0.013888
-7.32	-0.22377	-0.02932	0.012341
-7.01	-0.20681	-0.02624	-0.00308
-6.67	-0.20371	-0.02161	-0.00617
-6.39	-0.19137	-0.02006	-0.00926
-6.01	-0.19137	-0.01081	-0.00463
-5.7	-0.19599	-0.00926	-0.01234
-5.41	-0.18829	-0.01235	-2.3e-06
-5.04	-0.19136	-0.02006	0.006171
-4.79	-0.1852	-0.0324	0.00617
-4.41	-0.19445	-0.02162	-0.00154
-4.07	-0.17902	-0.03548	0
-3.76	-0.16822	-0.01698	0.001545
-3.44	-0.15896	-0.01543	0.007712
-3.07	-0.14816	-0.01235	0.001548
-2.79	-0.14815	-0.01389	0.007715
-2.41	-0.1389	-0.00926	0.009265
-2.13	-0.12964	-0.01389	0.026227
-1.82	-0.12501	-0.01235	0.018523
-1.5	-0.11729	-0.01235	0.02006
-1.19	-0.11112	-0.0108	0.015436
-0.87641	-0.10185	-0.00463	0.020059
-0.50081	-0.0818	0.003085	0.013891
-0.1878	-0.07408	0.007714	0.012344
0.125201	-0.07253	0.006173	0.004632
0.375604	-0.06482	0.004632	0.003085
0.719908	-0.0571	0.009254	-0.00308
0.970311	-0.04785	-0.00154	0.001545
1.35	-0.05401	2.27e-06	0.0108
1.72	-0.04167	0.007708	0.012344
2.03	-0.03241	-0.00617	0.00772
2.35	-0.03548	0.001544	0.013887
2.72	-0.00773	0.0108	0.012346
2.94	-0.00771	0.010804	0.010805
3.29	0.001543	0.013888	0.013891
3.63	0.009263	0.012349	0.020059
3.98	0.02469	0.018517	0.016981
4.23	0.032406	0.018517	0.026234
4.57	0.032418	0.010806	0.030862
4.91	0.055553	0.012349	0.024697
5.23	0.063278	0.021606	0.029321
5.51	0.080252	0.030862	0.029321
5.92	0.100307	0.030869	0.024691
6.2	0.103405	0.040123	0.015435
6.51	0.120372	0.041666	0.012347
6.85	0.126552	0.037041	0.010804
7.14	0.138892	0.038582	0.010804
7.51	0.141982	0.038579	0.01235
7.83	0.143529	0.029326	0.023142
8.2	0.155867	0.030865	0.013895
8.45	0.154331	0.029325	0.01852
8.73	0.158965	0.033953	0.024689
9.14	0.182104	0.040121	0.020066
9.39	0.196	0.035498	0.02469
9.7	0.219134	0.038582	0.021611
10.11	0.20836	0.041671	0.032402
10.45	0.243829	0.050925	0.023157
10.7	0.251556	0.050928	0.033949
10.99	0.262363	0.050925	0.035494
11.3	0.287042	0.041676	0.032411
11.64	0.288601	0.052468	0.035496
11.99	0.310201	0.054017	0.038582
12.33	0.334887	0.061734	0.040123
12.65	0.345694	0.077155	0.035492
12.96	0.353415	0.06791	0.02161
13.37	0.370386	0.074078	0.018519
13.55	0.382735	0.080248	0.013894
13.96	0.398162	0.078702	0.020063
14.18	0.39971	0.063284	0.027775
14.52	0.401261	0.072529	0.024698
14.9	0.422857	0.066364	0.035492
15.21	0.436753	0.067902	0.035493
15.59	0.461437	0.063285	0.029325
15.87	0.473786	0.087955	0.029322
16.21	0.481511	0.078713	0.029325
16.43	0.507733	0.083338	0.03704
16.84	0.515462	0.089508	0.047838
17.18	0.537059	0.089509	0.047841
17.4	0.547872	0.086426	0.046302
17.75	0.57564	0.08797	0.054009
18.12	0.591079	0.097225	0.046304
18.37	0.611144	0.100315	0.052465
18.72	0.642	0.108032	0.040126
19.09	0.657438	0.12037	0.029328
19.31	0.669788	0.117293	0.032407
19.78	0.691386	0.123462	0.030868
20.09	0.699112	0.126549	0.035492
20.31	0.719167	0.12809	0.03087
20.69	0.729973	0.121922	0.037037
21.03	0.739237	0.121918	0.03858
21.38	0.759292	0.117286	0.033955
21.66	0.770106	0.101869	0.037038
21.97	0.802501	0.118827	0.037041
22.25	0.81794	0.118839	0.041669
22.6	0.831831	0.134258	0.047838
22.94	0.848809	0.129636	0.044757
23.26	0.873499	0.126552	0.0463
23.57	0.899727	0.131178	0.052471
23.85	0.90746	0.132722	0.055557
24.26	0.9414	0.132723	0.055557
24.54	0.966093	0.134267	0.052475
24.85	0.983073	0.140438	0.05864
25.2	1.00468	0.14353	0.05247
25.48	1.03092	0.160497	0.041673
25.85	1.06486	0.165132	0.041673
26.23	1.07567	0.171301	0.05246
26.48	1.09727	0.168217	0.030879
26.76	1.11425	0.163588	0.046291
27.11	1.12197	0.158962	0.040132
27.48	1.14357	0.163587	0.050922
27.76	1.16055	0.165129	0.043219
28.11	1.17907	0.160507	0.055553
28.39	1.21147	0.171305	0.052472
28.77	1.23463	0.183647	0.05093
29.08	1.26086	0.185193	0.054016
29.45	1.27476	0.185194	0.058644
29.67	1.2979	0.185196	0.060189
30.05	1.32722	0.191363	0.064819
30.36	1.34421	0.185198	0.07253
30.64	1.37506	0.189824	0.06945
30.99	1.3905	0.195998	0.070988
31.24	1.41674	0.205255	0.064819
31.68	1.45377	0.209887	0.060192
31.93	1.49235	0.216063	0.064811
32.3	1.50779	0.229943	0.049392
32.65	1.54019	0.226868	0.052471
32.93	1.54792	0.237657	0.052473
33.24	1.57723	0.223782	0.055557
33.52	1.59884	0.225315	0.054017
33.93	1.61428	0.214524	0.057103
34.18	1.63126	0.225315	0.063274
34.52	1.66674	0.225321	0.066358
34.9	1.69607	0.228405	0.060189
35.15	1.71768	0.228409	0.057104
35.49	1.74237	0.237665	0.06019
35.78	1.77786	0.245382	0.069442
36.09	1.80101	0.25155	0.06174
36.5	1.83187	0.243847	0.078702
36.72	1.8504	0.259267	0.080249
37.06	1.88743	0.260813	0.077167
37.44	1.90751	0.256194	0.08025
37.69	1.9507	0.276243	0.081791
38.09	1.97541	0.28242	0.074076
38.41	2.01089	0.287055	0.061737
38.66	2.0356	0.302476	0.064818
39.06	2.07571	0.297861	0.067902
39.38	2.10195	0.311738	0.06482
39.69	2.12355	0.310194	0.067905
40	2.13128	0.29169	0.070991
40.31	2.16677	0.297854	0.074078
40.69	2.20226	0.304029	0.078702
41	2.22079	0.314825	0.069452
41.29	2.26553	0.313295	0.072536
41.6	2.27943	0.333343	0.080251
41.88	2.29487	0.336431	0.087959
42.22	2.33961	0.327183	0.074084
42.63	2.36895	0.336431	0.078706
42.88	2.41214	0.331805	0.080252
43.19	2.42913	0.325645	0.084882
43.57	2.45691	0.353401	0.092594
43.79	2.50166	0.350326	0.091052
44.16	2.53099	0.350328	0.084885
44.54	2.57728	0.356501	0.089507
44.88	2.60661	0.368846	0.084881
45.17	2.63902	0.38427	0.080254
45.42	2.6776	0.378111	0.083335
45.79	2.71926	0.388904	0.07871
46.11	2.7455	0.390451	0.081794
46.45	2.75631	0.391994	0.083339
46.79	2.7918	0.393534	0.089505
47.17	2.82729	0.385828	0.080256
47.42	2.85354	0.398164	0.086422
47.76	2.89211	0.401257	0.087966
48.05	2.9199	0.412055	0.086424
48.39	2.96618	0.418228	0.084884
48.67	2.98935	0.418228	0.092596
49.02	3.02792	0.413611	0.097227
49.27	3.06341	0.438281	0.101856
49.64	3.08812	0.432119	0.104942
49.96	3.14212	0.424407	0.103398
50.24	3.16836	0.427494	0.09723
50.61	3.19461	0.44139	0.098771
50.93	3.25786	0.484565	0.103397
51.3	3.29182	0.458364	0.098769
51.58	3.31498	0.455272	0.091053
51.9	3.35664	0.461442	0.081801
52.27	3.3906	0.46916	0.092593
52.52	3.43225	0.483041	0.092598
52.93	3.44307	0.47997	0.095685
53.21	3.46777	0.501557	0.103394
53.49	3.51097	0.496941	0.094151
53.84	3.55573	0.503112	0.114193
54.18	3.60665	0.513913	0.106488
54.53	3.64369	0.524712	0.101862
54.78	3.68226	0.523175	0.111111
55.15	3.69309	0.526264	0.104944
55.5	3.75171	0.541687	0.100321
55.81	3.77488	0.543238	0.115744
56.12	3.81654	0.550951	0.125002
56.43	3.85821	0.555578	0.123465
56.78	3.90913	0.549416	0.128085
57.09	3.94155	0.561753	0.111123
57.4	3.99709	0.569477	0.111114
57.72	4.02334	0.591078	0.103404
58.03	4.05267	0.61422	0.106486
58.31	4.08971	0.618857	0.108028
58.69	4.13755	0.623491	0.103402
59	4.19309	0.63891	0.104946
59.35	4.21317	0.629662	0.112657
59.72	4.26255	0.626573	0.1142
60	4.30112	0.621955	0.108034
60.25	4.31812	0.648164	0.11266
60.66	4.36132	0.632756	0.118827
60.94	4.3999	0.643551	0.108039
61.29	4.44774	0.660521	0.121914
61.57	4.48633	0.666701	0.120377
61.82	4.53416	0.680586	0.12038
62.23	4.57584	0.689836	0.129635
62.54	4.62058	0.666709	0.135808
62.82	4.64684	0.672877	0.140434
63.2	4.70855	0.694471	0.131183
63.48	4.75177	0.699112	0.13118
63.76	4.80423	0.716085	0.134259
64.17	4.83356	0.736143	0.11884
64.51	4.86444	0.746949	0.121918
64.79	4.91998	0.75775	0.120374
65.14	4.95086	0.763919	0.114212
65.42	5.00486	0.753129	0.132714
65.67	5.02648	0.760838	0.129635
66.11	5.06043	0.765479	0.123467
66.45	5.09902	0.797862	0.129635
66.73	5.16073	0.787075	0.13272
67.01	5.19932	0.777817	0.128095
67.33	5.24253	0.773186	0.131178
67.7	5.28112	0.771645	0.131183
68.02	5.32125	0.779365	0.140434
68.36	5.37062	0.805593	0.137355
68.7	5.40458	0.82874	0.140441
68.95	5.44626	0.842637	0.149694
69.36	5.51722	0.867309	0.146612
69.67	5.54965	0.848825	0.145071
69.92	5.59595	0.88121	0.149697
70.3	5.65459	0.899719	0.149694
70.64	5.70243	0.876606	0.137356
70.83	5.7441	0.910531	0.134265
71.21	5.78886	0.927503	0.128095
71.52	5.84133	0.916716	0.129638
71.93	5.89687	0.91979	0.135811
72.18	5.91234	0.904376	0.146605
72.49	5.97095	0.919791	0.138896
72.8	6.00338	0.919803	0.13119
73.12	6.05122	0.935236	0.154316
73.52	6.11448	0.967634	0.145073
73.74	6.15616	0.987693	0.148154
74.12	6.19474	0.986158	0.146611
74.49	6.23332	0.983089	0.141989
74.78	6.27654	1.02627	0.155869
75.12	6.33363	1.03399	0.162044
75.34	6.37839	1.02475	0.165131
75.78	6.42315	1.0448	0.168214
76	6.47716	1.04943	0.162045
76.4	6.53889	1.04172	0.15588
76.69	6.59136	1.04636	0.171295
77.09	6.63303	1.08337	0.160503
77.31	6.6747	1.08339	0.154329
77.62	6.721	1.0988	0.151242
78.03	6.7673	1.07105	0.149701
78.28	6.82285	1.07876	0.15587
78.63	6.86761	1.08647	0.157411
78.97	6.91082	1.09419	0.149708
79.35	6.95558	1.12042	0.166664
79.63	6.99571	1.1482	0.155877
79.97	7.05434	1.16827	0.160501

## Sheet: Fig. 4H
Currents (in nA) as a function of voltage with the indicated concentration of extracellular DIDS
Voltage (mV)	ctrl	100 µM DIDS
-80.03	-0.767	-0.741
-79.78	-0.77	-0.744
-79.44	-0.769	-0.744
-79.1	-0.759	-0.738
-78.78	-0.761	-0.742
-78.47	-0.755	-0.735
-78.16	-0.756	-0.722
-77.78	-0.773	-0.718
-77.53	-0.765	-0.719
-77.25	-0.767	-0.725
-76.87	-0.782	-0.725
-76.56	-0.801	-0.716
-76.25	-0.824	-0.705
-75.9	-0.824	-0.694
-75.53	-0.823	-0.685
-75.31	-0.821	-0.679
-74.9	-0.84	-0.676
-74.56	-0.829	-0.678
-74.24	-0.84	-0.678
-73.96	-0.844	-0.682
-73.62	-0.846	-0.687
-73.31	-0.838	-0.693
-73.02	-0.857	-0.685
-72.68	-0.843	-0.684
-72.34	-0.847	-0.671
-72.08	-0.846	-0.674
-71.65	-0.863	-0.664
-71.3	-0.861	-0.668
-71.02	-0.86	-0.656
-70.77	-0.875	-0.644
-70.46	-0.881	-0.639
-70.05	-0.907	-0.608
-69.83	-0.911	-0.605
-69.46	-0.912	-0.619
-69.08	-0.926	-0.61
-68.77	-0.917	-0.61
-68.42	-0.914	-0.613
-68.2	-0.926	-0.603
-67.86	-0.92	-0.611
-67.55	-0.912	-0.61
-67.17	-0.92	-0.61
-66.95	-0.921	-0.605
-66.58	-0.924	-0.616
-66.26	-0.914	-0.614
-65.82	-0.944	-0.62
-65.51	-0.954	-0.613
-65.17	-0.954	-0.603
-64.89	-0.932	-0.593
-64.6	-0.949	-0.588
-64.35	-0.963	-0.588
-63.88	-0.972	-0.568
-63.63	-0.994	-0.574
-63.32	-1.01	-0.571
-63.04	-1.02	-0.571
-62.66	-1.03	-0.56
-62.29	-1.03	-0.56
-62.01	-1.03	-0.549
-61.79	-1.04	-0.548
-61.44	-1.02	-0.556
-61.16	-1.02	-0.565
-60.79	-1.04	-0.557
-60.44	-1.04	-0.553
-60.1	-1.05	-0.562
-59.75	-1.05	-0.556
-59.5	-1.07	-0.559
-59.16	-1.06	-0.54
-58.75	-1.08	-0.539
-58.53	-1.09	-0.545
-58.12	-1.09	-0.532
-57.94	-1.09	-0.534
-57.56	-1.12	-0.542
-57.25	-1.13	-0.531
-56.94	-1.15	-0.526
-56.5	-1.15	-0.515
-56.22	-1.18	-0.522
-55.97	-1.19	-0.536
-55.62	-1.18	-0.528
-55.34	-1.18	-0.528
-54.99	-1.19	-0.523
-54.65	-1.21	-0.519
-54.27	-1.2	-0.514
-54.02	-1.21	-0.522
-53.71	-1.22	-0.52
-53.3	-1.23	-0.519
-52.99	-1.21	-0.529
-52.71	-1.22	-0.519
-52.43	-1.22	-0.514
-52.08	-1.24	-0.514
-51.68	-1.26	-0.511
-51.43	-1.26	-0.498
-51.11	-1.27	-0.486
-50.71	-1.28	-0.486
-50.46	-1.32	-0.478
-50.08	-1.32	-0.481
-49.8	-1.33	-0.469
-49.49	-1.33	-0.465
-49.17	-1.34	-0.458
-48.83	-1.33	-0.455
-48.52	-1.33	-0.452
-48.23	-1.32	-0.457
-47.86	-1.33	-0.455
-47.55	-1.34	-0.471
-47.26	-1.34	-0.469
-46.92	-1.35	-0.468
-46.61	-1.36	-0.468
-46.26	-1.38	-0.471
-45.92	-1.39	-0.457
-45.57	-1.41	-0.463
-45.29	-1.42	-0.454
-44.95	-1.42	-0.44
-44.67	-1.44	-0.44
-44.38	-1.45	-0.423
-44.07	-1.45	-0.427
-43.7	-1.47	-0.427
-43.35	-1.47	-0.423
-43.01	-1.46	-0.423
-42.72	-1.47	-0.423
-42.41	-1.47	-0.417
-42.13	-1.48	-0.418
-41.72	-1.48	-0.431
-41.47	-1.48	-0.415
-41.13	-1.49	-0.42
-40.75	-1.51	-0.421
-40.5	-1.5	-0.42
-40.13	-1.48	-0.423
-39.81	-1.48	-0.418
-39.5	-1.48	-0.426
-39.13	-1.49	-0.412
-38.88	-1.5	-0.409
-38.56	-1.51	-0.404
-38.19	-1.52	-0.398
-37.9	-1.54	-0.392
-37.53	-1.55	-0.383
-37.25	-1.55	-0.378
-36.93	-1.56	-0.378
-36.59	-1.57	-0.366
-36.25	-1.58	-0.358
-36	-1.59	-0.369
-35.62	-1.59	-0.367
-35.34	-1.57	-0.36
-34.96	-1.58	-0.363
-34.65	-1.58	-0.37
-34.31	-1.59	-0.366
-33.99	-1.58	-0.366
-33.68	-1.6	-0.367
-33.43	-1.59	-0.358
-33.02	-1.59	-0.363
-32.74	-1.59	-0.36
-32.43	-1.61	-0.344
-32.08	-1.6	-0.34
-31.77	-1.61	-0.324
-31.46	-1.62	-0.336
-31.11	-1.64	-0.332
-30.77	-1.64	-0.319
-30.49	-1.65	-0.319
-30.14	-1.65	-0.321
-29.86	-1.65	-0.321
-29.58	-1.65	-0.313
-29.2	-1.63	-0.307
-28.86	-1.63	-0.313
-28.55	-1.63	-0.316
-28.17	-1.61	-0.312
-27.92	-1.61	-0.318
-27.61	-1.61	-0.321
-27.23	-1.6	-0.33
-26.92	-1.61	-0.327
-26.64	-1.61	-0.31
-26.23	-1.6	-0.31
-25.98	-1.6	-0.309
-25.67	-1.58	-0.293
-25.32	-1.58	-0.292
-24.98	-1.58	-0.284
-24.73	-1.58	-0.284
-24.35	-1.59	-0.269
-24.01	-1.58	-0.272
-23.73	-1.59	-0.27
-23.32	-1.59	-0.264
-23.04	-1.56	-0.262
-22.76	-1.56	-0.262
-22.38	-1.55	-0.264
-22.13	-1.53	-0.275
-21.79	-1.52	-0.267
-21.47	-1.51	-0.265
-21.13	-1.5	-0.261
-20.85	-1.49	-0.269
-20.47	-1.45	-0.267
-20.22	-1.47	-0.264
-19.84	-1.46	-0.264
-19.44	-1.45	-0.248
-19.16	-1.44	-0.244
-18.87	-1.44	-0.235
-18.53	-1.43	-0.23
-18.28	-1.43	-0.216
-17.87	-1.42	-0.222
-17.53	-1.41	-0.213
-17.28	-1.41	-0.207
-16.96	-1.4	-0.21
-16.59	-1.39	-0.207
-16.28	-1.38	-0.201
-15.99	-1.36	-0.202
-15.62	-1.35	-0.199
-15.4	-1.33	-0.208
-15.06	-1.31	-0.211
-14.77	-1.29	-0.207
-14.43	-1.26	-0.215
-14.05	-1.25	-0.21
-13.8	-1.24	-0.199
-13.49	-1.22	-0.191
-13.05	-1.21	-0.19
-12.77	-1.19	-0.187
-12.46	-1.18	-0.168
-12.18	-1.16	-0.168
-11.8	-1.15	-0.156
-11.42	-1.13	-0.15
-11.14	-1.11	-0.148
-10.89	-1.11	-0.142
-10.55	-1.08	-0.136
-10.17	-1.07	-0.134
-9.89	-1.05	-0.14
-9.61	-1.02	-0.14
-9.23	-1	-0.134
-8.89	-0.969	-0.137
-8.61	-0.954	-0.139
-8.2	-0.923	-0.139
-7.95	-0.909	-0.137
-7.67	-0.863	-0.137
-7.32	-0.841	-0.127
-7.01	-0.806	-0.125
-6.67	-0.799	-0.113
-6.39	-0.775	-0.111
-6.01	-0.752	-0.0895
-5.7	-0.733	-0.088
-5.41	-0.716	-0.088
-5.04	-0.688	-0.0772
-4.79	-0.684	-0.0772
-4.41	-0.654	-0.0694
-4.07	-0.633	-0.0648
-3.76	-0.613	-0.0648
-3.44	-0.579	-0.0633
-3.07	-0.552	-0.0633
-2.79	-0.515	-0.0617
-2.41	-0.485	-0.0556
-2.13	-0.455	-0.0556
-1.82	-0.418	-0.0602
-1.5	-0.39	-0.0586
-1.19	-0.358	-0.0509
-0.87641	-0.321	-0.054
-0.50081	-0.293	-0.0432
-0.1878	-0.258	-0.0386
0.125201	-0.233	-0.034
0.375604	-0.211	-0.0262
0.719908	-0.176	-0.00926
0.970311	-0.162	0.00308
1.35	-0.123	0.00463
1.72	-0.0988	0.00926
2.03	-0.0741	0.0154
2.35	-0.0525	0.0124
2.72	-0.00926	0.0201
2.94	0.0216	0.0201
3.29	0.0525	0.0216
3.63	0.0833	0.0232
3.98	0.117	0.0293
4.23	0.165	0.0293
4.57	0.194	0.0262
4.91	0.233	0.034
5.23	0.284	0.037
5.51	0.321	0.0355
5.92	0.364	0.0525
6.2	0.394	0.0571
6.51	0.423	0.0664
6.85	0.457	0.0802
7.14	0.495	0.0895
7.51	0.523	0.0957
7.83	0.549	0.103
8.2	0.583	0.105
8.45	0.608	0.106
8.73	0.636	0.111
9.14	0.671	0.122
9.39	0.715	0.127
9.7	0.753	0.122
10.11	0.792	0.12
10.45	0.833	0.128
10.7	0.878	0.13
10.99	0.914	0.134
11.3	0.965	0.133
11.64	1.01	0.134
11.99	1.06	0.154
12.33	1.1	0.156
12.65	1.14	0.165
12.96	1.17	0.168
13.37	1.22	0.179
13.55	1.25	0.194
13.96	1.29	0.202
14.18	1.31	0.211
14.52	1.36	0.215
14.9	1.38	0.222
15.21	1.43	0.239
15.59	1.47	0.235
15.87	1.51	0.241
16.21	1.56	0.239
16.43	1.59	0.248
16.84	1.63	0.25
17.18	1.68	0.245
17.4	1.74	0.256
17.75	1.79	0.255
18.12	1.83	0.258
18.37	1.88	0.269
18.72	1.92	0.27
19.09	1.98	0.29
19.31	2.01	0.296
19.78	2.06	0.298
20.09	2.1	0.313
20.31	2.14	0.327
20.69	2.17	0.335
21.03	2.21	0.335
21.38	2.26	0.353
21.66	2.29	0.367
21.97	2.33	0.364
22.25	2.38	0.37
22.6	2.42	0.386
22.94	2.48	0.381
23.26	2.52	0.381
23.57	2.58	0.389
23.85	2.62	0.392
24.26	2.67	0.394
24.54	2.73	0.4
24.85	2.78	0.407
25.2	2.83	0.414
25.48	2.88	0.429
25.85	2.92	0.434
26.23	2.97	0.446
26.48	3.02	0.461
26.76	3.05	0.468
27.11	3.1	0.485
27.48	3.14	0.486
27.76	3.18	0.497
28.11	3.22	0.506
28.39	3.26	0.512
28.77	3.31	0.511
29.08	3.37	0.519
29.45	3.41	0.534
29.67	3.46	0.539
30.05	3.52	0.534
30.36	3.57	0.54
30.64	3.63	0.543
30.99	3.69	0.559
31.24	3.74	0.568
31.68	3.79	0.58
31.93	3.85	0.588
32.3	3.89	0.593
32.65	3.95	0.61
32.93	3.98	0.627
33.24	4.03	0.633
33.52	4.07	0.64
33.93	4.11	0.653
34.18	4.16	0.673
34.52	4.2	0.664
34.9	4.25	0.684
35.15	4.3	0.679
35.49	4.34	0.685
35.78	4.4	0.698
36.09	4.45	0.704
36.5	4.51	0.713
36.72	4.57	0.718
37.06	4.64	0.722
37.44	4.69	0.724
37.69	4.75	0.732
38.09	4.81	0.739
38.41	4.87	0.752
38.66	4.91	0.769
39.06	4.96	0.781
39.38	5.02	0.806
39.69	5.06	0.815
40	5.11	0.815
40.31	5.16	0.838
40.69	5.19	0.841
41	5.23	0.852
41.29	5.29	0.866
41.6	5.34	0.878
41.88	5.4	0.87
42.22	5.45	0.874
42.63	5.51	0.889
42.88	5.57	0.889
43.19	5.63	0.9
43.57	5.69	0.897
43.79	5.75	0.907
44.16	5.8	0.924
44.54	5.87	0.935
44.88	5.92	0.955
45.17	5.99	0.957
45.42	6.03	0.972
45.79	6.08	0.991
46.11	6.12	1
46.45	6.16	1.02
46.79	6.22	1.03
47.17	6.27	1.04
47.42	6.32	1.05
47.76	6.38	1.07
48.05	6.41	1.06
48.39	6.48	1.07
48.67	6.52	1.08
49.02	6.59	1.08
49.27	6.65	1.08
49.64	6.7	1.09
49.96	6.77	1.1
50.24	6.82	1.11
50.61	6.88	1.13
50.93	6.95	1.13
51.3	7	1.14
51.58	7.06	1.15
51.9	7.1	1.18
52.27	7.17	1.18
52.52	7.21	1.2
52.93	7.25	1.22
53.21	7.31	1.24
53.49	7.35	1.23
53.84	7.39	1.25
54.18	7.46	1.27
54.53	7.52	1.27
54.78	7.57	1.27
55.15	7.63	1.29
55.5	7.7	1.28
55.81	7.76	1.3
56.12	7.82	1.3
56.43	7.88	1.31
56.78	7.94	1.31
57.09	8.01	1.32
57.4	8.07	1.35
57.72	8.13	1.36
58.03	8.17	1.36
58.31	8.23	1.37
58.69	8.29	1.41
59	8.35	1.42
59.35	8.41	1.43
59.72	8.45	1.44
60	8.5	1.45
60.25	8.56	1.46
60.66	8.61	1.46
60.94	8.66	1.48
61.29	8.73	1.48
61.57	8.78	1.49
61.82	8.84	1.5
62.23	8.92	1.51
62.54	8.97	1.52
62.82	9.05	1.51
63.2	9.1	1.54
63.48	9.17	1.55
63.76	9.23	1.56
64.17	9.3	1.57
64.51	9.34	1.59
64.79	9.39	1.61
65.14	9.44	1.62
65.42	9.51	1.63
65.67	9.56	1.63
66.11	9.61	1.65
66.45	9.66	1.65
66.73	9.72	1.66
67.01	9.78	1.68
67.33	9.82	1.69
67.7	9.9	1.69
68.02	9.94	1.71
68.36	10	1.71
68.7	10.1	1.74
68.95	10.1	1.74
69.36	10.2	1.74
69.67	10.3	1.75
69.92	10.3	1.77
70.3	10.4	1.76
70.64	10.5	1.78
70.83	10.5	1.78
71.21	10.6	1.79
71.52	10.7	1.84
71.93	10.7	1.83
72.18	10.8	1.85
72.49	10.8	1.87
72.8	10.9	1.86
73.12	10.9	1.88
73.52	11	1.89
73.74	11	1.91
74.12	11.1	1.92
74.49	11.1	1.91
74.78	11.2	1.91
75.12	11.3	1.93
75.34	11.3	1.93
75.78	11.4	1.94
76	11.5	1.94
76.4	11.5	1.94
76.69	11.6	1.96
77.09	11.7	1.96
77.31	11.7	2
77.62	11.8	2
78.03	11.9	2.02
78.28	11.9	2.05
78.63	12	2.04
78.97	12	2.06
79.35	12.1	2.08
79.63	12.1	2.1
79.97	12.2	2.09
80.29	12.2	2.12
