# Supplementary material for: Identification of TMEM206 proteins as pore of PAORAC/ASOR acid-sensitive chloride channels
Source: eLife. 2019 Jul 18;8:e49187. doi: 10.7554/eLife.49187 (PMC6663466; doi:10.7554/eLife.49187)
Supplement: Figure 5—source data 1. [file elife-49187-fig5-data1.xlsx]

## Sheet: Fig. 5A
Representative I/V step protocol recordings from one cell each. Values are currents in Ampere in response to rectangular pulses to the indicated voltages. Sampling rate may differ between recordings.
	Human GFP-TMEM206 in TMEM206-/- pH7.4										Human GFP-TMEM206 in TMEM206-/- pH5										Naked mole-rat GFP-TMEM206 in TMEM206-/- pH7.4										Naked mole-rat GFP-TMEM206 in TMEM206-/- pH5										Chicken GFP-TMEM206 in TMEM206-/- pH7.4
Time (s)	-80 mV	-60 mV	-40 mV	-20 mV	0 mV	20 mV	40 mV	60 mV	80 mV	Time (s)	-80 mV	-60 mV	-40 mV	-20 mV	0 mV	20 mV	40 mV	60 mV	80 mV	Time (s)	-80 mV	-60 mV	-40 mV	-20 mV	0 mV	20 mV	40 mV	60 mV	80 mV	Time (s)	-80 mV	-60 mV	-40 mV	-20 mV	0 mV	20 mV	40 mV	60 mV	80 mV	Time (s)	-80 mV	-60 mV	-40 mV	-20 mV	0 mV	20 mV	40 mV	60 mV	80 mV
0.001005	3.06067e-12	1.38642e-11	1.54114e-11	-2.53363e-14	-7.73894e-12	1.38642e-11	2.00334e-11	2.0034e-11	1.84924e-11	0	-1.34275e-10	-1.38923e-10	-1.52758e-10	-1.51196e-10	-1.51205e-10	-1.6347e-10	-1.62036e-10	-1.69816e-10	-1.7588e-10	0.001005	9.24e-12	2.77e-11	3.24e-11	3.24e-11	3.7e-11	2e-11	3.08e-11	1.85e-11	2.31e-11	0	-2.96617e-09	-2.93056e-09	-2.91206e-09	-2.85334e-09	-2.83036e-09	-2.83644e-09	-2.81025e-09	-2.81486e-09	-2.82102e-09	0.001005	1.84958e-11	3.39252e-11	2.62094e-11	2.77538e-11	2.62094e-11	2.92954e-11	2.46711e-11	1.69485e-11	2.46666e-11
0.00201	-6.78729e-11	-5.55233e-11	-4.31872e-11	-6.94162e-11	-6.94162e-11	-5.55267e-11	-6.01475e-11	-5.86048e-11	-5.55267e-11	0.00025	-1.35745e-10	-1.43516e-10	-1.48173e-10	-1.43544e-10	-1.45123e-10	-1.4368e-10	-1.60529e-10	-1.78912e-10	-1.66738e-10	0.00201	-4.32e-11	-5.55e-11	-2.93e-11	-3.24e-11	-4.16e-11	-4.94e-11	-4.94e-11	-5.71e-11	-5.09e-11	0.00025	-2.96297e-09	-2.90751e-09	-2.89209e-09	-2.82119e-09	-2.82723e-09	-2.81655e-09	-2.798e-09	-2.79954e-09	-2.80415e-09	0.00201	-4.62681e-11	-4.00922e-11	-4.62636e-11	-4.16371e-11	-4.62636e-11	-4.47243e-11	-3.39275e-11	-5.86116e-11	-4.62709e-11
0.003015	-5.24767e-11	-2.93331e-11	-3.39551e-11	-5.24784e-11	-4.47603e-11	-3.85843e-11	-2.93348e-11	-2.77943e-11	-4.32091e-11	0.0005	-1.26595e-10	-1.46603e-10	-1.46585e-10	-1.38896e-10	-1.48137e-10	-1.49662e-10	-1.63497e-10	-1.69788e-10	-1.68218e-10	0.003015	-3.4e-11	-3.4e-11	-2.16e-11	-1.54e-11	-2.32e-11	-3.86e-11	-3.86e-11	-3.86e-11	-4.17e-11	0.0005	-2.93698e-09	-2.8783e-09	-2.86745e-09	-2.79955e-09	-2.81334e-09	-2.80565e-09	-2.79019e-09	-2.78862e-09	-2.78713e-09	0.003015	-2.77825e-11	-2.31549e-11	-2.31583e-11	-2.46959e-11	-2.31549e-11	-3.39567e-11	-2.46937e-11	-4.32176e-11	-4.16709e-11
0.00402	-5.0925e-11	-3.24084e-11	-3.24078e-11	-5.40087e-11	-3.39584e-11	-2.77853e-11	-3.24073e-11	-3.85776e-11	-2.31588e-11	0.00075	-1.25042e-10	-1.48055e-10	-1.40502e-10	-1.3432e-10	-1.48164e-10	-1.49644e-10	-1.51324e-10	-1.65131e-10	-1.69707e-10	0.00402	-2.78e-11	-1.39e-11	-1.08e-11	-2.01e-11	-2.62e-11	-4.17e-11	-2.78e-11	-3.86e-11	-3.24e-11	0.00075	-2.92899e-09	-2.86133e-09	-2.84735e-09	-2.78413e-09	-2.7888e-09	-2.78872e-09	-2.77174e-09	-2.7626e-09	-2.76415e-09	0.00402	-1.85222e-11	-2.1606e-11	-2.46875e-11	-1.69778e-11	-1.54373e-11	-3.54944e-11	-1.85222e-11	-4.32086e-11	-4.32108e-11
0.005025	-4.01265e-11	-3.39511e-11	-2.77808e-11	-3.85894e-11	-4.01203e-11	-3.39528e-11	-3.08657e-11	-3.70405e-11	-2.93235e-11	0.001	-1.29599e-10	-1.32832e-10	-1.45032e-10	-1.38859e-10	-1.49626e-10	-1.40512e-10	-1.52821e-10	-1.60483e-10	-1.62063e-10	0.005025	-2.01e-11	-1.23e-11	-1.23e-11	-1.7e-11	-1.7e-11	-4.63e-11	-4.32e-11	-3.4e-11	-4.32e-11	0.001	-2.8938e-09	-2.85798e-09	-2.82587e-09	-2.77627e-09	-2.77941e-09	-2.77331e-09	-2.75327e-09	-2.75628e-09	-2.76237e-09	0.005025	-1.69772e-11	-2.00621e-11	-1.23513e-11	-1.38946e-11	-2.00587e-11	-3.39567e-11	-2.00632e-11	-3.39573e-11	-4.16653e-11
0.00603	-3.2414e-11	-3.24073e-11	-2.77825e-11	-4.32086e-11	-3.24084e-11	-4.16647e-11	-2.93263e-11	-4.01226e-11	-3.85748e-11	0.00125	-1.28065e-10	-1.35782e-10	-1.4348e-10	-1.37334e-10	-1.38959e-10	-1.43498e-10	-1.60438e-10	-1.52876e-10	-1.57479e-10	0.00603	-1.54e-11	-3.09e-12	-1.24e-11	-2.01e-11	-1.85e-11	-3.86e-11	-4.32e-11	-3.4e-11	-4.01e-11	0.00125	-2.8827e-09	-2.82434e-09	-2.82418e-09	-2.7517e-09	-2.76247e-09	-2.76245e-09	-2.74393e-09	-2.74546e-09	-2.74251e-09	0.00603	-1.852e-11	-1.69801e-11	-1.38867e-11	-2.46875e-11	-1.38924e-11	-4.47479e-11	-2.31476e-11	-3.85787e-11	-3.08724e-11
0.007035	-3.85776e-11	-2.62381e-11	-3.70354e-11	-3.85815e-11	-2.31577e-11	-3.85843e-11	-3.85798e-11	-3.55e-11	-2.7787e-11	0.0015	-1.21974e-10	-1.34238e-10	-1.3432e-10	-1.32731e-10	-1.38896e-10	-1.41973e-10	-1.57388e-10	-1.60411e-10	-1.63524e-10	0.007035	-3.09e-12	-7.72e-12	-2.31e-11	-2.62e-11	-2.32e-11	-3.55e-11	-3.24e-11	-2.78e-11	-3.86e-11	0.0015	-2.84607e-09	-2.81181e-09	-2.81796e-09	-2.73172e-09	-2.74397e-09	-2.74703e-09	-2.73002e-09	-2.72705e-09	-2.73925e-09	0.007035	-2.15998e-11	-2.46847e-11	-7.72205e-12	-2.16088e-11	-1.54351e-11	-3.54972e-11	-2.16065e-11	-3.39534e-11	-3.85725e-11
0.00804	-3.24078e-11	-2.6233e-11	-3.70422e-11	-3.24084e-11	-3.70287e-11	-4.16698e-11	-4.16709e-11	-4.32102e-11	-3.85759e-11	0.00175	-1.24988e-10	-1.28102e-10	-1.34238e-10	-1.29654e-10	-1.38968e-10	-1.38959e-10	-1.49699e-10	-1.52803e-10	-1.58986e-10	0.00804	-3.09e-12	-1.08e-11	-1.08e-11	-2.47e-11	-3.39e-11	-2.47e-11	-4.63e-11	-3.09e-11	-3.4e-11	0.00175	-2.85185e-09	-2.79033e-09	-2.79955e-09	-2.72996e-09	-2.72698e-09	-2.72862e-09	-2.70851e-09	-2.71924e-09	-2.72242e-09	0.00804	-7.72261e-12	-1.08131e-11	-1.69705e-11	-2.62336e-11	-2.3147e-11	-3.08696e-11	-2.16093e-11	-3.24067e-11	-2.00717e-11
0.009045	-2.31509e-11	-1.85256e-11	-4.62918e-11	-2.46948e-11	-2.31543e-11	-4.7839e-11	-5.09227e-11	-4.62951e-11	-3.24151e-11	0.002	-1.24933e-10	-1.23535e-10	-1.29736e-10	-1.29609e-10	-1.51114e-10	-1.46557e-10	-1.42046e-10	-1.48219e-10	-1.5894e-10	0.009045	-3.09e-12	-1.85e-11	-2.62e-11	-3.55e-11	-2.93e-11	-2.47e-11	-3.4e-11	-1.7e-11	-2.47e-11	0.002	-2.83501e-09	-2.78098e-09	-2.78713e-09	-2.71006e-09	-2.71004e-09	-2.72544e-09	-2.69463e-09	-2.7069e-09	-2.71616e-09	0.009045	-1.08024e-11	-2.46903e-11	-1.08075e-11	-2.46993e-11	-2.46914e-11	-3.70349e-11	-3.08657e-11	-2.46937e-11	-2.62308e-11
0.01005	-1.85256e-11	-2.77746e-11	-3.70439e-11	-2.31493e-11	-2.31498e-11	-4.62985e-11	-4.47586e-11	-4.01316e-11	-4.32097e-11	0.00225	-1.12751e-10	-1.31143e-10	-1.41918e-10	-1.25097e-10	-1.42055e-10	-1.45023e-10	-1.45005e-10	-1.5431e-10	-1.55926e-10	0.01005	-1.08e-11	-2.16e-11	-2.78e-11	-3.55e-11	-3.7e-11	-2.16e-11	-2.32e-11	-1.85e-11	-2.62e-11	0.00225	-2.81807e-09	-2.76866e-09	-2.76871e-09	-2.69919e-09	-2.69919e-09	-2.72228e-09	-2.68985e-09	-2.69155e-09	-2.70686e-09	0.01005	-1.2348e-11	-3.24045e-11	-1.69744e-11	-4.16563e-11	-2.31526e-11	-3.24073e-11	-4.01203e-11	-2.00632e-11	-1.85228e-11
0.011055	-3.08623e-11	-2.4697e-11	-4.16653e-11	-2.16082e-11	-2.46925e-11	-4.4753e-11	-4.78378e-11	-5.09222e-11	-4.78401e-11	0.0025	-1.15728e-10	-1.32713e-10	-1.4348e-10	-1.35636e-10	-1.45014e-10	-1.35873e-10	-1.37398e-10	-1.57369e-10	-1.61936e-10	0.011055	-1.08e-11	-2.01e-11	-2.16e-11	-3.24e-11	-3.55e-11	-1.08e-11	-2.01e-11	-2.31e-11	-2.16e-11	0.0025	-2.80712e-09	-2.7578e-09	-2.75935e-09	-2.68687e-09	-2.68691e-09	-2.70689e-09	-2.66997e-09	-2.6868e-09	-2.6869e-09	0.011055	-1.85143e-11	-2.77797e-11	-1.85205e-11	-2.46999e-11	-3.08612e-11	-2.31543e-11	-3.5495e-11	-1.69727e-11	-2.00593e-11
0.01206	-3.3946e-11	-3.39505e-11	-3.70433e-11	-2.62313e-11	-2.62353e-11	-3.70439e-11	-4.01265e-11	-4.47592e-11	-4.78407e-11	0.00275	-1.15701e-10	-1.32704e-10	-1.37361e-10	-1.17417e-10	-1.38896e-10	-1.37334e-10	-1.37334e-10	-1.52803e-10	-1.49735e-10	0.01206	-9.26e-12	-3.09e-11	-3.55e-11	-3.55e-11	-4.32e-11	-6.18e-12	-2.62e-11	-1.39e-11	-1.39e-11	0.00275	-2.77803e-09	-2.73933e-09	-2.74251e-09	-2.67608e-09	-2.68374e-09	-2.68696e-09	-2.66522e-09	-2.67299e-09	-2.67454e-09	0.01206	-1.08097e-11	-2.46937e-11	-2.31464e-11	-2.77791e-11	-2.62398e-11	-2.7774e-11	-2.93269e-11	-4.64167e-12	-1.23502e-11
0.013065	-2.00689e-11	-3.8581e-11	-4.47496e-11	-1.85245e-11	-2.62375e-11	-4.32069e-11	-3.54972e-11	-4.93828e-11	-4.47575e-11	0.003	-1.08121e-10	-1.29627e-10	-1.3275e-10	-1.20322e-10	-1.32759e-10	-1.35873e-10	-1.3432e-10	-1.51233e-10	-1.43571e-10	0.013065	-1.85e-11	-3.09e-11	-3.7e-11	-2.16e-11	-3.24e-11	-7.71e-12	-1.39e-11	-1.55e-12	-9.26e-12	0.003	-2.76863e-09	-2.72086e-09	-2.74078e-09	-2.66982e-09	-2.67599e-09	-2.6837e-09	-2.65601e-09	-2.66367e-09	-2.66682e-09	0.013065	-2.16032e-11	-2.46931e-11	-2.00644e-11	-3.08651e-11	-3.24045e-11	-1.85239e-11	-3.54905e-11	-2.46802e-11	-1.54306e-11
0.01407	-2.31481e-11	-4.01259e-11	-3.70394e-11	-2.46925e-11	-3.08657e-11	-3.54972e-11	-3.54921e-11	-4.78407e-11	-4.78395e-11	0.00325	-1.15692e-10	-1.25051e-10	-1.32741e-10	-1.1423e-10	-1.3275e-10	-1.44914e-10	-1.40375e-10	-1.48237e-10	-1.45078e-10	0.01407	-2.78e-11	-4.01e-11	-3.39e-11	-2.78e-11	-3.7e-11	-1.55e-12	-1.08e-11	-6.17e-12	-6.17e-12	0.00325	-2.75632e-09	-2.71152e-09	-2.7239e-09	-2.653e-09	-2.65756e-09	-2.66836e-09	-2.64978e-09	-2.64831e-09	-2.66361e-09	0.01407	-2.4692e-11	-2.62336e-11	-2.16071e-11	-3.24056e-11	-2.62375e-11	-2.16026e-11	-2.77774e-11	-1.08064e-11	-1.23485e-11
0.015075	-2.31487e-11	-4.32119e-11	-3.08702e-11	-3.08612e-11	-3.54933e-11	-3.24101e-11	-2.6242e-11	-4.32091e-11	-4.47524e-11	0.0035	-1.14221e-10	-1.28065e-10	-1.35782e-10	-1.12751e-10	-1.37334e-10	-1.2822e-10	-1.35827e-10	-1.5884e-10	-1.48064e-10	0.015075	-3.86e-11	-4.01e-11	-2.32e-11	-2.31e-11	-4.01e-11	-1.39e-11	-4.63e-12	-4.63e-12	-7.72e-12	0.0035	-2.74702e-09	-2.69771e-09	-2.70853e-09	-2.65128e-09	-2.64368e-09	-2.6575e-09	-2.63753e-09	-2.63899e-09	-2.64368e-09	0.015075	-2.62353e-11	-2.1606e-11	-2.62353e-11	-2.46959e-11	-2.46976e-11	-1.5434e-11	-1.54407e-11	-6.18214e-12	-1.54295e-11
0.01608	-2.1611e-11	-4.62934e-11	-3.70366e-11	-2.46931e-11	-3.39528e-11	-3.24073e-11	-3.3946e-11	-3.08713e-11	-3.39584e-11	0.00375	-1.15774e-10	-1.26504e-10	-1.34257e-10	-1.2644e-10	-1.38905e-10	-1.3264e-10	-1.34284e-10	-1.49799e-10	-1.35945e-10	0.01608	-3.86e-11	-3.4e-11	-3.09e-11	-1.85e-11	-3.86e-11	-1.23e-11	-9.26e-12	-1.7e-11	-1.7e-11	0.00375	-2.7331e-09	-2.69294e-09	-2.70372e-09	-2.6359e-09	-2.63596e-09	-2.64066e-09	-2.63434e-09	-2.62519e-09	-2.62983e-09	0.01608	-2.62392e-11	-1.69789e-11	-2.93196e-11	-2.62319e-11	-3.70292e-11	-1.23463e-11	-2.46863e-11	-2.6224e-11	-9.26364e-12
0.017085	-3.39449e-11	-3.55e-11	-3.70349e-11	-2.00666e-11	-3.39539e-11	-2.7778e-11	-2.46942e-11	-3.39489e-11	-4.01226e-11	0.004	-1.21819e-10	-1.17408e-10	-1.31215e-10	-1.21938e-10	-1.41955e-10	-1.23563e-10	-1.35773e-10	-1.57379e-10	-1.46539e-10	0.017085	-4.01e-11	-3.4e-11	-2.93e-11	-1.08e-11	-2.16e-11	-1.23e-11	-6.17e-12	-7.72e-12	-4.64e-12	0.004	-2.71008e-09	-2.67303e-09	-2.68079e-09	-2.616e-09	-2.63273e-09	-2.64044e-09	-2.62354e-09	-2.62201e-09	-2.62818e-09	0.017085	-3.54876e-11	-2.00599e-11	-2.46948e-11	-1.69795e-11	-2.31538e-11	-9.26139e-12	-1.69772e-11	-1.38924e-11	-1.38862e-11
0.01809	-2.6242e-11	-3.70366e-11	-2.62403e-11	-2.62364e-11	-3.85815e-11	-2.00678e-11	-2.00655e-11	-2.7783e-11	-3.85793e-11	0.00425	-1.11226e-10	-1.27992e-10	-1.34193e-10	-1.20322e-10	-1.40466e-10	-1.31106e-10	-1.31234e-10	-1.58849e-10	-1.45078e-10	0.01809	-4.32e-11	-3.7e-11	-2.78e-11	-1.23e-11	-1.85e-11	-2.16e-11	-4.63e-12	-1.23e-11	-1.08e-11	0.00425	-2.69918e-09	-2.66363e-09	-2.67594e-09	-2.61882e-09	-2.61134e-09	-2.62057e-09	-2.60514e-09	-2.61424e-09	-2.62207e-09	0.01809	-2.31549e-11	-1.54334e-11	-2.62347e-11	-1.69784e-11	-2.16048e-11	-1.08058e-11	-1.23491e-11	-9.26364e-12	-9.2642e-12
0.019095	-3.54905e-11	-3.2409e-11	-2.77785e-11	-3.39494e-11	-4.16675e-11	-2.62324e-11	-2.3147e-11	-3.24033e-11	-2.93275e-11	0.0045	-1.18796e-10	-1.21928e-10	-1.25024e-10	-1.09691e-10	-1.43453e-10	-1.26577e-10	-1.35763e-10	-1.42128e-10	-1.45032e-10	0.019095	-4.17e-11	-3.24e-11	-2.62e-11	-1.55e-12	-1.54e-11	-1.08e-11	-1.54e-11	-1.85e-11	-9.26e-12	0.0045	-2.68532e-09	-2.64215e-09	-2.65293e-09	-2.59901e-09	-2.60657e-09	-2.61272e-09	-2.60044e-09	-2.59284e-09	-2.62042e-09	0.019095	-2.62369e-11	-1.23457e-11	-2.4692e-11	-2.31459e-11	-1.69767e-11	-2.00593e-11	-1.54278e-11	-1.54334e-11	-1.69739e-11
0.0201	-3.08724e-11	-2.77808e-11	-2.77757e-11	-3.39539e-11	-4.16692e-11	-2.31538e-11	-2.00655e-11	-2.16116e-11	-3.39477e-11	0.00475	-1.20312e-10	-1.17371e-10	-1.18933e-10	-1.18806e-10	-1.34329e-10	-1.26549e-10	-1.3275e-10	-1.49653e-10	-1.38932e-10	0.0201	-2.78e-11	-2.47e-11	-1.23e-11	-1.23e-11	-6.18e-12	-2.01e-11	-2.16e-11	-2.47e-11	-9.26e-12	0.00475	-2.67299e-09	-2.62819e-09	-2.63446e-09	-2.5988e-09	-2.59583e-09	-2.59441e-09	-2.59729e-09	-2.59263e-09	-2.60668e-09	0.0201	-3.24022e-11	-7.72148e-12	-2.1606e-11	-2.00638e-11	-1.38918e-11	-2.00593e-11	-4.63717e-12	-2.31476e-11	-1.85222e-11
0.021105	-4.47462e-11	-2.77757e-11	-1.85245e-11	-3.85827e-11	-4.32119e-11	-3.24022e-11	-2.46875e-11	-2.62319e-11	-2.62375e-11	0.005	-1.11217e-10	-1.26486e-10	-1.29581e-10	-1.23381e-10	-1.358e-10	-1.2654e-10	-1.34257e-10	-1.49662e-10	-1.3885e-10	0.021105	-3.24e-11	-1.85e-11	-3.09e-12	1.53e-12	-1.39e-11	-2.78e-11	-1.7e-11	-3.24e-11	-1.54e-11	0.005	-2.66522e-09	-2.61132e-09	-2.62823e-09	-2.5835e-09	-2.58967e-09	-2.60035e-09	-2.58501e-09	-2.57731e-09	-2.60497e-09	0.021105	-2.00678e-11	-1.69711e-11	-1.8516e-11	-2.00599e-11	-1.69744e-11	-1.08097e-11	-1.38862e-11	-2.62364e-11	-2.77757e-11
0.02211	-3.39567e-11	-1.85233e-11	-2.31487e-11	-4.47524e-11	-4.47496e-11	-2.31566e-11	-1.54351e-11	-2.00666e-11	-2.31509e-11	0.00525	-1.1876e-10	-1.24979e-10	-1.31152e-10	-1.14312e-10	-1.35791e-10	-1.25006e-10	-1.34302e-10	-1.43607e-10	-1.31279e-10	0.02211	-2.16e-11	-1.23e-11	-7.71e-12	-9.26e-12	-1.23e-11	-2.78e-11	-2.01e-11	-2.78e-11	-2.16e-11	0.00525	-2.6529e-09	-2.60813e-09	-2.62508e-09	-2.57569e-09	-2.58954e-09	-2.59269e-09	-2.57423e-09	-2.56651e-09	-2.5881e-09	0.02211	-2.16054e-11	-1.23463e-11	-6.17876e-12	-1.23485e-11	-1.54306e-11	-2.00599e-11	-1.38873e-11	-3.08662e-11	-2.77791e-11
0.023115	-3.54955e-11	-2.00655e-11	-2.62319e-11	-4.32119e-11	-3.08752e-11	-3.39449e-11	-1.23564e-11	-2.46914e-11	-2.46948e-11	0.0055	-1.14239e-10	-1.18878e-10	-1.28102e-10	-1.23326e-10	-1.32759e-10	-1.23435e-10	-1.40357e-10	-1.5116e-10	-1.40348e-10	0.023115	-2.16e-11	-7.72e-12	-1.55e-12	-9.26e-12	-1.08e-11	-3.7e-11	-2.31e-11	-3.7e-11	-2.32e-11	0.0055	-2.6391e-09	-2.60194e-09	-2.61433e-09	-2.55887e-09	-2.57424e-09	-2.58032e-09	-2.56953e-09	-2.56034e-09	-2.57274e-09	0.023115	-2.16032e-11	-7.71867e-12	-9.2597e-12	-1.08064e-11	-7.71754e-12	-2.16054e-11	-7.72036e-12	-3.70337e-11	-2.77802e-11
0.02412	-3.70388e-11	-2.93145e-11	-1.85273e-11	-4.16675e-11	-4.32029e-11	-2.46999e-11	-3.70259e-11	-2.62358e-11	-3.24022e-11	0.00575	-1.1571e-10	-1.2034e-10	-1.26577e-10	-1.09701e-10	-1.35745e-10	-1.17371e-10	-1.3275e-10	-1.45096e-10	-1.3432e-10	0.02412	-1.7e-11	-1.39e-11	-1.55e-12	-1.39e-11	-1.54e-11	-4.01e-11	-2.32e-11	-3.55e-11	-2.93e-11	0.00575	-2.6389e-09	-2.58968e-09	-2.60499e-09	-2.56019e-09	-2.56637e-09	-2.55887e-09	-2.55876e-09	-2.56024e-09	-2.5711e-09	0.02412	-1.38912e-11	-9.26083e-12	-1.23429e-11	-1.8516e-11	-3.09051e-12	-2.16054e-11	-1.23463e-11	-2.93286e-11	-3.0864e-11
0.025125	-3.8581e-11	-1.69823e-11	-3.23999e-11	-3.70422e-11	-3.08691e-11	-3.5491e-11	-2.62437e-11	-2.77785e-11	-2.16161e-11	0.006	-1.1118e-10	-1.15819e-10	-1.2959e-10	-1.17262e-10	-1.28211e-10	-1.24942e-10	-1.2969e-10	-1.43507e-10	-1.37334e-10	0.025125	-1.39e-11	-7.72e-12	-1.54e-11	-2.01e-11	-1.7e-11	-3.7e-11	-3.39e-11	-2.62e-11	-3.4e-11	0.006	-2.61901e-09	-2.58492e-09	-2.58357e-09	-2.54186e-09	-2.54037e-09	-2.55562e-09	-2.54793e-09	-2.5495e-09	-2.56794e-09	0.025125	-1.08052e-11	-1.38867e-11	-6.17933e-12	-1.69767e-11	-9.26026e-12	-2.00672e-11	-1.69778e-11	-3.85759e-11	-2.93241e-11
0.02613	-3.70366e-11	-2.16065e-11	-2.16116e-11	-4.1663e-11	-2.77791e-11	-3.39522e-11	-3.70332e-11	-2.7783e-11	-3.85753e-11	0.00625	-1.17253e-10	-1.23435e-10	-1.25042e-10	-1.20322e-10	-1.40321e-10	-1.21992e-10	-1.35782e-10	-1.38886e-10	-1.37325e-10	0.02613	-5.63e-15	-6.17e-12	-1.08e-11	-2.62e-11	-1.39e-11	-3.24e-11	-3.09e-11	-3.7e-11	-3.4e-11	0.00625	-2.60821e-09	-2.56657e-09	-2.58182e-09	-2.53561e-09	-2.53559e-09	-2.54332e-09	-2.5326e-09	-2.5372e-09	-2.5511e-09	0.02613	-1.38873e-11	-1.08092e-11	-1.69722e-11	-1.6975e-11	-1.69705e-11	-3.086e-11	-2.62313e-11	-3.08679e-11	-3.24095e-11
0.027135	-2.9323e-11	-2.77718e-11	-2.62324e-11	-3.08685e-11	-2.46925e-11	-3.24146e-11	-3.24146e-11	-3.85787e-11	-3.70399e-11	0.0065	-1.17299e-10	-1.26567e-10	-1.2654e-10	-1.14239e-10	-1.32832e-10	-1.31125e-10	-1.37334e-10	-1.32804e-10	-1.32731e-10	0.027135	-1.54e-12	-5.07e-15	-1.54e-11	-2.32e-11	-2.31e-11	-2.93e-11	-2.62e-11	-3.55e-11	-2.78e-11	0.0065	-2.6081e-09	-2.56336e-09	-2.56503e-09	-2.52788e-09	-2.52635e-09	-2.52952e-09	-2.52945e-09	-2.53247e-09	-2.54337e-09	0.027135	-1.08019e-11	-2.46869e-11	-1.69744e-11	-1.38935e-11	-9.26533e-12	-2.62392e-11	-2.31481e-11	-2.93218e-11	-3.70332e-11
0.02814	-2.31549e-11	-1.38986e-11	-2.16099e-11	-2.77808e-11	-2.1611e-11	-4.62918e-11	-4.32063e-11	-4.01288e-11	-3.85815e-11	0.00675	-1.18806e-10	-1.32604e-10	-1.2654e-10	-1.14258e-10	-1.43416e-10	-1.31152e-10	-1.358e-10	-1.40339e-10	-1.29654e-10	0.02814	3.08e-12	-7.71e-12	-1.24e-11	-2.62e-11	-2.62e-11	-2.32e-11	-2.16e-11	-2.47e-11	-2.62e-11	0.00675	-2.60031e-09	-2.55413e-09	-2.56339e-09	-2.51713e-09	-2.51559e-09	-2.52939e-09	-2.52785e-09	-2.51869e-09	-2.54174e-09	0.02814	-4.63604e-12	-2.31509e-11	-1.2348e-11	-2.1606e-11	-1.69727e-11	-3.08617e-11	-1.69812e-11	-2.62364e-11	-2.62398e-11
0.029145	-3.24061e-11	-2.46914e-11	-2.77814e-11	-2.93196e-11	-3.24022e-11	-4.1672e-11	-3.85838e-11	-5.0921e-11	-3.8586e-11	0.007	-1.15764e-10	-1.18997e-10	-1.25024e-10	-1.23372e-10	-1.35882e-10	-1.26567e-10	-1.32722e-10	-1.31188e-10	-1.29645e-10	0.029145	-9.26e-12	-9.26e-12	-2.47e-11	-3.09e-11	-2.78e-11	-2.47e-11	-2.62e-11	-2.93e-11	-2.62e-11	0.007	-2.57138e-09	-2.54487e-09	-2.56173e-09	-2.51247e-09	-2.51089e-09	-2.52013e-09	-2.51855e-09	-2.51399e-09	-2.5325e-09	0.029145	-1.54266e-11	-2.62369e-11	-1.23457e-11	-2.93173e-11	-1.54351e-11	-2.46948e-11	-2.4692e-11	-2.4692e-11	-2.62358e-11
0.03015	-3.39477e-11	-3.24039e-11	-4.0122e-11	-2.31521e-11	-2.46925e-11	-4.62929e-11	-3.85815e-11	-4.16732e-11	-4.93789e-11	0.00725	-1.15755e-10	-1.32586e-10	-1.26476e-10	-1.17317e-10	-1.40402e-10	-1.25006e-10	-1.29663e-10	-1.23526e-10	-1.31115e-10	0.03015	-1.08e-11	-2.47e-11	-2.78e-11	-2.62e-11	-3.09e-11	-2.31e-11	-2.62e-11	-1.24e-11	-2.01e-11	0.00725	-2.5878e-09	-2.53411e-09	-2.54034e-09	-2.50783e-09	-2.50016e-09	-2.50175e-09	-2.49416e-09	-2.50627e-09	-2.51872e-09	0.03015	-9.26252e-12	-3.2405e-11	-1.08069e-11	-2.31549e-11	-2.00627e-11	-2.4692e-11	-3.08657e-11	-2.16037e-11	-2.62319e-11
0.031155	-2.31504e-11	-2.62398e-11	-4.32091e-11	-2.46931e-11	-1.69817e-11	-3.55012e-11	-3.70399e-11	-4.47535e-11	-4.32164e-11	0.0075	-1.17308e-10	-1.23608e-10	-1.15828e-10	-1.15792e-10	-1.38914e-10	-1.23454e-10	-1.31106e-10	-1.26522e-10	-1.22038e-10	0.031155	-1.7e-11	-2.32e-11	-2.78e-11	-2.78e-11	-3.86e-11	-1.7e-11	-2.93e-11	-1.08e-11	-2.31e-11	0.0075	-2.5558e-09	-2.5294e-09	-2.53394e-09	-2.50164e-09	-2.49706e-09	-2.49859e-09	-2.50613e-09	-2.49555e-09	-2.51855e-09	0.031155	-1.08013e-11	-2.77814e-11	-2.00559e-11	-3.24073e-11	-2.46886e-11	-2.31498e-11	-3.70332e-11	-1.23519e-11	-1.54385e-11
0.03216	-1.54396e-11	-3.08668e-11	-3.85872e-11	-2.77791e-11	-2.4688e-11	-4.01254e-11	-3.85798e-11	-4.32131e-11	-4.93811e-11	0.00775	-1.21837e-10	-1.38768e-10	-1.18842e-10	-1.21874e-10	-1.40375e-10	-1.20376e-10	-1.20485e-10	-1.2507e-10	-1.32586e-10	0.03216	-1.85e-11	-2.78e-11	-3.7e-11	-4.01e-11	-3.55e-11	-1.55e-12	-1.7e-11	-1.23e-11	-6.18e-12	0.00775	-2.5434e-09	-2.5171e-09	-2.50643e-09	-2.49234e-09	-2.49844e-09	-2.497e-09	-2.49085e-09	-2.49546e-09	-2.50331e-09	0.03216	-7.71923e-12	-2.9323e-11	-1.08109e-11	-3.70377e-11	-1.8525e-11	-2.31493e-11	-2.77808e-11	-1.85177e-11	-2.00616e-11
0.033165	-2.62324e-11	-3.85798e-11	-4.78356e-11	-3.08595e-11	-2.00644e-11	-4.47524e-11	-3.39534e-11	-4.47507e-11	-4.47575e-11	0.008	-1.12742e-10	-1.32713e-10	-1.2339e-10	-1.20413e-10	-1.31261e-10	-1.17362e-10	-1.28074e-10	-1.3422e-10	-1.20513e-10	0.033165	-1.39e-11	-2.78e-11	-3.86e-11	-2.78e-11	-3.09e-11	-1.23e-11	-4.64e-12	-9.26e-12	-1.7e-11	0.008	-2.54329e-09	-2.5063e-09	-2.50165e-09	-2.47246e-09	-2.47707e-09	-2.48935e-09	-2.47398e-09	-2.49083e-09	-2.50469e-09	0.033165	-1.23485e-11	-3.24067e-11	-2.31436e-11	-3.85787e-11	-2.77746e-11	-2.31442e-11	-2.31526e-11	-2.00616e-11	-2.16009e-11
0.03417	-2.77757e-11	-4.01248e-11	-4.01304e-11	-1.69801e-11	-2.00678e-11	-4.16681e-11	-3.24118e-11	-3.39573e-11	-4.62968e-11	0.00825	-1.17262e-10	-1.25042e-10	-1.15819e-10	-1.24951e-10	-1.35754e-10	-1.26486e-10	-1.32686e-10	-1.35782e-10	-1.31106e-10	0.03417	-2.62e-11	-4.01e-11	-2.62e-11	-2.16e-11	-3.24e-11	-1.54e-11	-1.23e-11	-7.72e-12	-1.7e-11	0.00825	-2.5356e-09	-2.49709e-09	-2.49549e-09	-2.47228e-09	-2.47233e-09	-2.4877e-09	-2.47381e-09	-2.48165e-09	-2.49538e-09	0.03417	-2.31453e-11	-2.93241e-11	-2.00678e-11	-3.08674e-11	-2.46931e-11	-9.26533e-12	-2.77763e-11	-1.85188e-11	-9.26702e-12
0.035175	-2.00694e-11	-4.01242e-11	-4.62912e-11	-1.38935e-11	-3.39489e-11	-3.70388e-11	-3.85798e-11	-3.7036e-11	-4.32125e-11	0.0085	-1.17262e-10	-1.23417e-10	-1.20331e-10	-1.20367e-10	-1.31234e-10	-1.25061e-10	-1.31125e-10	-1.32677e-10	-1.29636e-10	0.035175	-1.85e-11	-3.24e-11	-4.17e-11	-1.85e-11	-3.09e-11	-9.26e-12	-1.55e-12	-6.18e-12	1.53e-12	0.0085	-2.52479e-09	-2.49695e-09	-2.48935e-09	-2.46146e-09	-2.46616e-09	-2.47387e-09	-2.46156e-09	-2.48e-09	-2.46788e-09	0.035175	-2.31476e-11	-3.08589e-11	-3.08595e-11	-2.77774e-11	-2.31498e-11	-1.0803e-11	-2.46914e-11	-1.54334e-11	-1.6975e-11
0.03618	-3.08617e-11	-3.70416e-11	-3.24112e-11	-2.16026e-11	-3.85798e-11	-3.24106e-11	-3.85765e-11	-3.24112e-11	-4.16647e-11	0.00875	-1.12714e-10	-1.14294e-10	-1.17317e-10	-1.14267e-10	-1.35745e-10	-1.32677e-10	-1.20458e-10	-1.22029e-10	-1.28093e-10	0.03618	-2.78e-11	-3.55e-11	-3.09e-11	-1.55e-12	-2.32e-11	-1.23e-11	-6.17e-12	-1.7e-11	-1.54e-11	0.00875	-2.5109e-09	-2.48315e-09	-2.48919e-09	-2.43854e-09	-2.45837e-09	-2.45851e-09	-2.45233e-09	-2.46931e-09	-2.46921e-09	0.03618	-1.85256e-11	-1.38946e-11	-2.46987e-11	-2.00644e-11	-2.31521e-11	-1.23463e-11	-1.85233e-11	-1.38901e-11	-2.16009e-11
0.037185	-3.0864e-11	-4.16658e-11	-2.46965e-11	-2.00678e-11	-3.70433e-11	-3.24084e-11	-2.31566e-11	-3.39528e-11	-2.93263e-11	0.009	-1.17253e-10	-1.20322e-10	-1.18796e-10	-1.18851e-10	-1.29681e-10	-1.32677e-10	-1.23417e-10	-1.29572e-10	-1.26558e-10	0.037185	-3.55e-11	-3.7e-11	-3.09e-11	-1.39e-11	-1.85e-11	-1.54e-11	-3.09e-12	-1.39e-11	-1.08e-11	0.009	-2.49244e-09	-2.47082e-09	-2.46786e-09	-2.44143e-09	-2.43694e-09	-2.45226e-09	-2.4522e-09	-2.46773e-09	-2.46316e-09	0.037185	-3.086e-11	-1.08064e-11	-3.54871e-11	-1.69756e-11	-3.08606e-11	-1.38867e-11	-2.31436e-11	-1.38912e-11	-1.23502e-11
0.03819	-2.62414e-11	-3.85843e-11	-2.77808e-11	-3.24045e-11	-4.78356e-11	-3.08662e-11	-2.77763e-11	-3.70337e-11	-2.77847e-11	0.00925	-1.15746e-10	-1.17262e-10	-1.14221e-10	-1.26476e-10	-1.31179e-10	-1.25015e-10	-1.18887e-10	-1.26504e-10	-1.2654e-10	0.03819	-3.24e-11	-3.09e-11	-1.85e-11	-7.72e-12	-1.7e-11	-1.08e-11	-7.72e-12	-1.24e-11	-6.18e-12	0.00925	-2.48015e-09	-2.4616e-09	-2.47071e-09	-2.43683e-09	-2.43222e-09	-2.44304e-09	-2.43843e-09	-2.46916e-09	-2.47066e-09	0.03819	-2.77814e-11	-1.69727e-11	-2.31538e-11	-1.23502e-11	-2.46903e-11	-7.72148e-12	-1.2348e-11	-1.85211e-11	-1.38896e-11
0.039195	-3.70349e-11	-4.1663e-11	-3.54882e-11	-3.24106e-11	-4.16703e-11	-3.08651e-11	-2.46886e-11	-2.62403e-11	-4.1658e-11	0.0095	-1.14194e-10	-1.09737e-10	-1.12687e-10	-1.2201e-10	-1.32668e-10	-1.1886e-10	-1.2339e-10	-1.15855e-10	-1.24988e-10	0.039195	-3.09e-11	-2.01e-11	-2.16e-11	-1.55e-12	-1.39e-11	-2.62e-11	-9.26e-12	-2.31e-11	-1.54e-11	0.0095	-2.48302e-09	-2.46303e-09	-2.46001e-09	-2.42909e-09	-2.42912e-09	-2.43686e-09	-2.43224e-09	-2.45541e-09	-2.45544e-09	0.039195	-3.08623e-11	-1.38901e-11	-2.31504e-11	-1.85155e-11	-1.23536e-11	-1.543e-11	-6.1782e-12	-2.7774e-11	-1.54357e-11
0.0402	-3.70377e-11	-2.93258e-11	-2.31515e-11	-3.70394e-11	-4.01254e-11	-2.93201e-11	-1.08137e-11	-2.77808e-11	-2.62409e-11	0.00975	-1.11153e-10	-1.29445e-10	-1.15764e-10	-1.32631e-10	-1.25088e-10	-1.17344e-10	-1.15828e-10	-1.23417e-10	-1.20422e-10	0.0402	-3.09e-11	-2.47e-11	-7.72e-12	-4.63e-12	-7.72e-12	-2.47e-11	-1.08e-11	-2.78e-11	-1.54e-11	0.00975	-2.46624e-09	-2.45688e-09	-2.45234e-09	-2.41528e-09	-2.42454e-09	-2.4337e-09	-2.43059e-09	-2.4491e-09	-2.45218e-09	0.0402	-2.46948e-11	-1.23468e-11	-2.62324e-11	-1.38924e-11	-2.00576e-11	-1.54323e-11	-1.38828e-11	-2.31504e-11	-2.46875e-11
0.041205	-3.39551e-11	-2.62392e-11	-1.69795e-11	-4.32102e-11	-3.85849e-11	-2.16093e-11	-2.62268e-11	-3.3946e-11	-2.46925e-11	0.01	-1.14176e-10	-1.17362e-10	-1.21847e-10	-1.28093e-10	-1.31106e-10	-1.24988e-10	-1.21874e-10	-1.23463e-10	-1.23508e-10	0.041205	-3.39e-11	-1.7e-11	-5.07e-15	-9.26e-12	-1.23e-11	-2.16e-11	-1.08e-11	-2.78e-11	-1.85e-11	0.01	-2.46156e-09	-2.44612e-09	-2.45528e-09	-2.40752e-09	-2.42748e-09	-2.42141e-09	-2.41526e-09	-2.42771e-09	-2.43231e-09	0.041205	-2.46925e-11	-1.23446e-11	-2.00599e-11	-1.69744e-11	-1.38924e-11	-1.38901e-11	-3.09501e-12	-2.16088e-11	-2.00678e-11
0.04221	-3.85821e-11	-3.24022e-11	-2.00632e-11	-4.47558e-11	-4.47502e-11	-2.31493e-11	-1.69812e-11	-2.31526e-11	-2.31504e-11	0.01025	-1.12651e-10	-1.17299e-10	-1.15746e-10	-1.23463e-10	-1.25033e-10	-1.29536e-10	-1.20367e-10	-1.23444e-10	-1.34147e-10	0.04221	-2.16e-11	-1.23e-11	-6.17e-12	-7.71e-12	-7.72e-12	-3.24e-11	-1.54e-11	-2.16e-11	-2.01e-11	0.01025	-2.45997e-09	-2.43843e-09	-2.44456e-09	-2.3999e-09	-2.41212e-09	-2.40909e-09	-2.40294e-09	-2.42748e-09	-2.42758e-09	0.04221	-2.46892e-11	-7.71811e-12	-6.17989e-12	-1.54311e-11	-1.54306e-11	-1.38924e-11	-1.54289e-11	-2.77802e-11	-2.93184e-11
0.043215	-4.32091e-11	-2.00661e-11	-2.46892e-11	-4.78367e-11	-3.70405e-11	-2.46948e-11	-2.16065e-11	-2.1606e-11	-2.46942e-11	0.0105	-1.096e-10	-1.18851e-10	-1.09619e-10	-1.18942e-10	-1.23517e-10	-1.17344e-10	-1.17344e-10	-1.20413e-10	-1.25106e-10	0.043215	-9.27e-12	-4.64e-12	-1.23e-11	1.54e-12	-1.23e-11	-2.78e-11	-2.31e-11	-2.47e-11	-2.16e-11	0.0105	-2.45378e-09	-2.43838e-09	-2.43381e-09	-2.40744e-09	-2.39067e-09	-2.40132e-09	-2.39824e-09	-2.41067e-09	-2.42142e-09	0.043215	-1.54351e-11	-7.7198e-12	-1.08013e-11	-9.26195e-12	-1.08064e-11	-2.16032e-11	-1.6975e-11	-3.7036e-11	-2.77819e-11
0.04422	-4.01259e-11	-1.69817e-11	-2.00632e-11	-3.70427e-11	-3.39528e-11	-3.24073e-11	-2.77785e-11	-2.00666e-11	-3.08623e-11	0.01075	-1.11107e-10	-1.23372e-10	-1.11098e-10	-1.3265e-10	-1.31106e-10	-1.14267e-10	-1.23353e-10	-1.23399e-10	-1.32659e-10	0.04422	-1.85e-11	-1.23e-11	-6.18e-12	-7.72e-12	-1.7e-11	-3.39e-11	-2.16e-11	-3.24e-11	-2.78e-11	0.01075	-2.44151e-09	-2.43678e-09	-2.4322e-09	-2.40135e-09	-2.39053e-09	-2.38905e-09	-2.39059e-09	-2.40448e-09	-2.41673e-09	0.04422	-1.23474e-11	-1.69722e-11	-1.08035e-11	-9.26083e-12	-1.54289e-11	-2.16099e-11	-1.54351e-11	-3.85793e-11	-3.39472e-11
0.045225	-3.85804e-11	-2.93151e-11	-1.69812e-11	-3.70394e-11	-3.24067e-11	-3.54933e-11	-3.2409e-11	-2.93201e-11	-2.77797e-11	0.011	-1.11098e-10	-1.12742e-10	-1.09573e-10	-1.34211e-10	-1.2654e-10	-1.21856e-10	-1.11189e-10	-1.15819e-10	-1.29654e-10	0.045225	-1.85e-11	1.54e-12	-1.08e-11	-1.39e-11	-1.54e-11	-2.78e-11	-3.24e-11	-2.62e-11	-3.55e-11	0.011	-2.43526e-09	-2.42451e-09	-2.42758e-09	-2.39514e-09	-2.38744e-09	-2.3843e-09	-2.39047e-09	-2.40587e-09	-2.40295e-09	0.045225	-1.23457e-11	-1.54345e-11	-1.23468e-11	-1.23474e-11	-9.26195e-12	-3.24033e-11	-2.00604e-11	-3.24101e-11	-2.62414e-11
0.04623	-3.24095e-11	-2.16065e-11	-2.77763e-11	-3.85798e-11	-2.46976e-11	-3.24129e-11	-3.70382e-11	-3.24112e-11	-2.62398e-11	0.01125	-1.08066e-10	-1.15737e-10	-1.08003e-10	-1.26595e-10	-1.20449e-10	-1.1886e-10	-1.11171e-10	-1.20376e-10	-1.29618e-10	0.04623	-6.18e-12	-1.54e-12	-1.23e-11	-2.16e-11	-1.7e-11	-2.62e-11	-3.09e-11	-2.47e-11	-3.55e-11	0.01125	-2.42299e-09	-2.41372e-09	-2.42136e-09	-2.38285e-09	-2.38127e-09	-2.36755e-09	-2.37827e-09	-2.38909e-09	-2.3983e-09	0.04623	-1.0803e-11	-1.85177e-11	-1.54283e-11	-1.8516e-11	-9.2597e-12	-2.77797e-11	-1.85228e-11	-2.93246e-11	-3.39494e-11
0.047235	-2.77819e-11	-1.54396e-11	-3.08645e-11	-3.39556e-11	-3.08623e-11	-4.01237e-11	-4.01231e-11	-4.1663e-11	-3.54927e-11	0.0115	-1.11035e-10	-1.17253e-10	-1.01939e-10	-1.26513e-10	-1.26476e-10	-1.20358e-10	-1.20294e-10	-1.24879e-10	-1.26549e-10	0.047235	-4.63e-12	-7.72e-12	-1.08e-11	-2.62e-11	-1.23e-11	-3.86e-11	-2.62e-11	-2.01e-11	-3.09e-11	0.0115	-2.41685e-09	-2.40748e-09	-2.40607e-09	-2.37359e-09	-2.3721e-09	-2.37647e-09	-2.3781e-09	-2.38741e-09	-2.39978e-09	0.047235	-9.26252e-12	-1.69756e-11	-6.17876e-12	-1.54368e-11	-9.26026e-12	-2.46954e-11	-2.62324e-11	-3.24073e-11	-3.39505e-11
0.04824	-3.08623e-11	-2.77757e-11	-3.08657e-11	-3.85781e-11	-2.77797e-11	-4.32119e-11	-3.70422e-11	-3.55023e-11	-3.70394e-11	0.01175	-1.0045e-10	-1.12769e-10	-1.09537e-10	-1.2044e-10	-1.20449e-10	-1.18878e-10	-1.15764e-10	-1.08185e-10	-1.23463e-10	0.04824	-3.09e-12	-1.23e-11	-1.54e-11	-3.39e-11	-1.7e-11	-2.47e-11	-2.93e-11	-2.62e-11	-3.09e-11	0.01175	-2.42286e-09	-2.39365e-09	-2.40592e-09	-2.36742e-09	-2.37506e-09	-2.3552e-09	-2.36131e-09	-2.37823e-09	-2.39672e-09	0.04824	-1.543e-11	-1.38957e-11	-1.23429e-11	-2.3147e-11	-1.08047e-11	-2.93207e-11	-2.46954e-11	-3.08645e-11	-2.9323e-11
0.049245	-2.46925e-11	-3.08634e-11	-3.08691e-11	-3.24106e-11	-2.62336e-11	-4.62991e-11	-4.32114e-11	-4.78345e-11	-4.01259e-11	0.012	-1.12587e-10	-1.26404e-10	-1.1108e-10	-1.24979e-10	-1.26504e-10	-1.24924e-10	-1.14167e-10	-1.1718e-10	-1.20431e-10	0.049245	-3.09e-12	-1.23e-11	-7.72e-12	-3.4e-11	-1.85e-11	-3.09e-11	-2.78e-11	-2.32e-11	-2.32e-11	0.012	-2.4137e-09	-2.38292e-09	-2.39673e-09	-2.36587e-09	-2.36888e-09	-2.35808e-09	-2.35814e-09	-2.37359e-09	-2.39361e-09	0.049245	-1.38884e-11	-2.77735e-11	-9.26195e-12	-2.4692e-11	-1.69739e-11	-2.93213e-11	-3.08617e-11	-2.62341e-11	-2.62347e-11
0.05025	-1.85228e-11	-2.7778e-11	-4.01237e-11	-3.08674e-11	-1.8525e-11	-5.09244e-11	-4.78401e-11	-4.0131e-11	-4.4753e-11	0.01225	-1.12641e-10	-1.15792e-10	-1.06532e-10	-1.25024e-10	-1.25024e-10	-1.17371e-10	-1.06559e-10	-1.08139e-10	-1.26513e-10	0.05025	-9.25e-12	-1.7e-11	-2.31e-11	-3.09e-11	-3.39e-11	-1.85e-11	-3.24e-11	-2.47e-11	-2.16e-11	0.01225	-2.40596e-09	-2.38735e-09	-2.38904e-09	-2.36735e-09	-2.35197e-09	-2.35197e-09	-2.35499e-09	-2.37206e-09	-2.38591e-09	0.05025	-9.26195e-12	-2.62381e-11	-1.23491e-11	-2.46937e-11	-1.69767e-11	-2.62358e-11	-2.62392e-11	-1.69784e-11	-2.00616e-11
0.051255	-2.16026e-11	-2.16155e-11	-4.47507e-11	-3.39483e-11	-2.62313e-11	-4.47614e-11	-4.7839e-11	-4.78373e-11	-4.32119e-11	0.0125	-1.0961e-10	-1.12669e-10	-1.09537e-10	-1.28038e-10	-1.26522e-10	-1.23408e-10	-1.11162e-10	-1.17199e-10	-1.26586e-10	0.051255	-1.18e-14	-1.7e-11	-2.62e-11	-4.01e-11	-2.78e-11	-2.16e-11	-2.47e-11	-1.08e-11	-3.09e-11	0.0125	-2.39522e-09	-2.37365e-09	-2.38743e-09	-2.36121e-09	-2.3366e-09	-2.34732e-09	-2.34124e-09	-2.37651e-09	-2.37671e-09	0.051255	-1.08035e-11	-3.08623e-11	-2.31459e-11	-2.77774e-11	-1.85233e-11	-2.31515e-11	-3.08645e-11	-1.38918e-11	-1.08103e-11
0.05226	-1.54385e-11	-4.16613e-11	-3.70411e-11	-2.62403e-11	-2.16082e-11	-5.55492e-11	-4.01259e-11	-4.32131e-11	-4.16681e-11	0.01275	-1.12623e-10	-1.11126e-10	-1.06496e-10	-1.21965e-10	-1.23526e-10	-1.20376e-10	-1.23335e-10	-1.11171e-10	-1.32604e-10	0.05226	-2.31e-11	-2.01e-11	-3.09e-11	-3.09e-11	-3.09e-11	-1.08e-11	-1.08e-11	-2.47e-11	-1.7e-11	0.01275	-2.39204e-09	-2.37362e-09	-2.38128e-09	-2.35352e-09	-2.33343e-09	-2.33959e-09	-2.34117e-09	-2.3567e-09	-2.37667e-09	0.05226	-1.38867e-11	-2.62353e-11	-2.46903e-11	-2.62369e-11	-3.08623e-11	-2.62324e-11	-3.24067e-11	-1.6975e-11	-2.15992e-11
0.053265	-2.46869e-11	-4.16703e-11	-3.54995e-11	-3.08595e-11	-2.31504e-11	-4.1672e-11	-3.39556e-11	-4.16692e-11	-3.85849e-11	0.013	-1.096e-10	-1.11116e-10	-1.04943e-10	-1.23444e-10	-1.3107e-10	-1.17362e-10	-1.14267e-10	-1.14176e-10	-1.18942e-10	0.053265	-2.47e-11	-3.55e-11	-3.86e-11	-2.47e-11	-3.4e-11	-1.23e-11	-1.08e-11	-7.72e-12	-1.7e-11	0.013	-2.38128e-09	-2.38274e-09	-2.37356e-09	-2.34735e-09	-2.32732e-09	-2.32733e-09	-2.34271e-09	-2.35499e-09	-2.37813e-09	0.053265	-9.26702e-12	-2.00678e-11	-2.00644e-11	-2.77819e-11	-3.39483e-11	-2.00661e-11	-2.77819e-11	-1.69761e-11	-1.38935e-11
0.05427	-1.85245e-11	-4.62946e-11	-4.47445e-11	-1.85239e-11	-2.77785e-11	-3.7036e-11	-3.7036e-11	-4.16658e-11	-4.32069e-11	0.01325	-1.11126e-10	-1.11126e-10	-1.03473e-10	-1.21928e-10	-1.20449e-10	-1.26504e-10	-1.15719e-10	-1.12678e-10	-1.2339e-10	0.05427	-2.93e-11	-3.7e-11	-4.78e-11	-2.62e-11	-3.7e-11	-7.72e-12	-1.23e-11	-1.23e-11	-1.54e-11	0.01325	-2.36902e-09	-2.37656e-09	-2.36436e-09	-2.34421e-09	-2.32871e-09	-2.32424e-09	-2.34565e-09	-2.34283e-09	-2.36735e-09	0.05427	-2.46858e-11	-2.77735e-11	-2.00621e-11	-3.70315e-11	-2.62386e-11	-2.31442e-11	-3.08645e-11	-1.69767e-11	-1.69727e-11
0.055275	-2.62308e-11	-4.01304e-11	-2.47004e-11	-1.85194e-11	-3.08657e-11	-2.47004e-11	-3.24106e-11	-3.39567e-11	-3.3959e-11	0.0135	-1.14185e-10	-1.12641e-10	-1.14139e-10	-1.21928e-10	-1.2191e-10	-1.28065e-10	-1.12669e-10	-1.14194e-10	-1.1591e-10	0.055275	-3.24e-11	-3.55e-11	-3.55e-11	-2.01e-11	-2.78e-11	-4.63e-12	-1.08e-11	-7.72e-12	-7.72e-12	0.0135	-2.3704e-09	-2.3536e-09	-2.36431e-09	-2.33502e-09	-2.31203e-09	-2.33022e-09	-2.32581e-09	-2.35187e-09	-2.34896e-09	0.055275	-2.16099e-11	-2.0061e-11	-1.8525e-11	-2.62375e-11	-2.62375e-11	-1.23508e-11	-3.08612e-11	-1.8516e-11	-1.08081e-11
0.05628	-2.00683e-11	-4.78333e-11	-2.62341e-11	-1.85222e-11	-3.39505e-11	-3.39483e-11	-3.24073e-11	-3.85759e-11	-4.32024e-11	0.01375	-1.14221e-10	-1.11144e-10	-1.14167e-10	-1.23408e-10	-1.21938e-10	-1.25006e-10	-1.11153e-10	-1.14157e-10	-1.356e-10	0.05628	-3.24e-11	-3.86e-11	-2.62e-11	-1.85e-11	-2.47e-11	-9.26e-12	-6.18e-12	-2.16e-11	-6.17e-12	0.01375	-2.35814e-09	-2.34579e-09	-2.36416e-09	-2.33191e-09	-2.32712e-09	-2.31348e-09	-2.31962e-09	-2.34576e-09	-2.34427e-09	0.05628	-2.9319e-11	-7.72317e-12	-3.24022e-11	-2.00644e-11	-3.08595e-11	-1.38856e-11	-1.85245e-11	-1.08097e-11	-1.85166e-11
0.057285	-2.93218e-11	-3.24174e-11	-2.31521e-11	-2.62324e-11	-3.24135e-11	-3.24101e-11	-2.77825e-11	-2.62403e-11	-2.62386e-11	0.014	-1.17217e-10	-1.14176e-10	-1.08048e-10	-1.15819e-10	-1.24997e-10	-1.21938e-10	-1.15719e-10	-1.06596e-10	-1.20476e-10	0.057285	-4.32e-11	-3.55e-11	-3.55e-11	-1.54e-11	-2.31e-11	-3.09e-12	-1.08e-11	-1.39e-11	-4.63e-12	0.014	-2.34592e-09	-2.33823e-09	-2.33832e-09	-2.33031e-09	-2.31654e-09	-2.31335e-09	-2.32409e-09	-2.33502e-09	-2.3442e-09	0.057285	-2.77785e-11	-1.3885e-11	-2.77814e-11	-1.85211e-11	-1.85262e-11	-4.63604e-12	-2.00587e-11	-2.15998e-11	-1.85205e-11
0.05829	-3.70366e-11	-4.01181e-11	-2.77729e-11	-2.46959e-11	-4.32063e-11	-3.39494e-11	-3.2405e-11	-2.62364e-11	-1.6984e-11	0.01425	-1.08075e-10	-1.12632e-10	-1.04961e-10	-1.20376e-10	-1.26513e-10	-1.21965e-10	-1.15719e-10	-1.17162e-10	-1.21892e-10	0.05829	-2.93e-11	-2.47e-11	-2.32e-11	-1.08e-11	-7.72e-12	-7.72e-12	-9.26e-12	-1.7e-11	-7.72e-12	0.01425	-2.3549e-09	-2.35631e-09	-2.35329e-09	-2.32109e-09	-2.31783e-09	-2.30715e-09	-2.3134e-09	-2.33033e-09	-2.33662e-09	0.05829	-2.46937e-11	-7.7198e-12	-2.93224e-11	-2.16037e-11	-2.4692e-11	-1.23446e-11	-1.08086e-11	-1.54373e-11	-2.16037e-11
0.059295	-3.85815e-11	-2.77853e-11	-1.54385e-11	-3.24056e-11	-3.85872e-11	-2.77802e-11	-2.62369e-11	-2.77769e-11	-2.93151e-11	0.0145	-1.06496e-10	-1.06541e-10	-1.04916e-10	-1.24915e-10	-1.21974e-10	-1.29563e-10	-1.11144e-10	-1.06568e-10	-1.18887e-10	0.059295	-3.4e-11	-2.47e-11	-1.7e-11	-9.26e-12	-1.08e-11	-1.54e-11	-1.23e-11	-1.39e-11	-1.39e-11	0.0145	-2.33813e-09	-2.32738e-09	-2.33207e-09	-2.31035e-09	-2.28898e-09	-2.29034e-09	-2.30572e-09	-2.32113e-09	-2.34411e-09	0.059295	-2.46908e-11	-1.07985e-11	-3.08567e-11	-1.85177e-11	-2.93179e-11	-1.54311e-11	-1.69699e-11	-2.16032e-11	-1.85228e-11
0.0603	-3.85849e-11	-3.24067e-11	-1.85183e-11	-3.08724e-11	-4.78362e-11	-2.4697e-11	-2.31487e-11	-2.31526e-11	-2.1611e-11	0.01475	-1.06441e-10	-1.09537e-10	-1.00404e-10	-1.14367e-10	-1.2644e-10	-1.25024e-10	-1.11144e-10	-1.09573e-10	-1.24988e-10	0.0603	-3.39e-11	-2.93e-11	-1.39e-11	-1.54e-11	-1.08e-11	-2.16e-11	-1.7e-11	-1.7e-11	-1.39e-11	0.01475	-2.33033e-09	-2.31656e-09	-2.33799e-09	-2.30873e-09	-2.30854e-09	-2.29166e-09	-2.30713e-09	-2.31808e-09	-2.32893e-09	0.0603	-2.00644e-11	-1.54891e-12	-7.72937e-12	-1.08064e-11	-2.16037e-11	-1.38918e-11	-6.17876e-12	-2.00661e-11	-2.46908e-11
0.061305	-4.62946e-11	-3.0864e-11	-1.85205e-11	-4.7835e-11	-4.16715e-11	-3.39477e-11	-1.85217e-11	-2.77752e-11	-2.77746e-11	0.015	-9.88611e-11	-1.06459e-10	-1.11025e-10	-1.31024e-10	-1.12732e-10	-1.23499e-10	-1.15664e-10	-1.12687e-10	-1.28038e-10	0.061305	-2.62e-11	-2.62e-11	-3.09e-12	-6.18e-12	-6.18e-12	-2.47e-11	-1.85e-11	-3.09e-11	-1.7e-11	0.015	-2.31811e-09	-2.32115e-09	-2.33031e-09	-2.30409e-09	-2.29338e-09	-2.27332e-09	-2.29488e-09	-2.32563e-09	-2.33329e-09	0.061305	-2.00638e-11	-7.71191e-12	-2.00559e-11	-1.23446e-11	-7.72317e-12	-1.85183e-11	-1.07996e-11	-2.77763e-11	-2.62336e-11
0.06231	-4.32153e-11	-2.46959e-11	-2.16048e-11	-4.62974e-11	-4.32091e-11	-3.08645e-11	-2.00649e-11	-2.16077e-11	-2.16093e-11	0.01525	-1.06396e-10	-9.89066e-11	-1.06523e-10	-1.21965e-10	-1.11162e-10	-1.2802e-10	-1.06578e-10	-1.20249e-10	-1.21974e-10	0.06231	-2.78e-11	-1.39e-11	-1.23e-11	-9.26e-12	-9.26e-12	-2.93e-11	-2.16e-11	-2.32e-11	-2.01e-11	0.01525	-2.3226e-09	-2.33483e-09	-2.31499e-09	-2.29487e-09	-2.28865e-09	-2.26557e-09	-2.28568e-09	-2.31651e-09	-2.31198e-09	0.06231	-2.31493e-11	-1.54891e-12	-1.38935e-11	-9.26477e-12	-1.23412e-11	-2.00593e-11	-6.17595e-12	-2.77814e-11	-2.16099e-11
0.063315	-4.93806e-11	-2.77752e-11	-2.16077e-11	-4.16737e-11	-3.70399e-11	-2.46959e-11	-2.77763e-11	-2.00632e-11	-2.46925e-11	0.0155	-9.88611e-11	-1.14085e-10	-1.08057e-10	-1.2034e-10	-1.17262e-10	-1.20413e-10	-1.12614e-10	-1.06623e-10	-1.25024e-10	0.063315	-1.7e-11	-1.08e-11	-9.26e-12	-9.26e-12	-1.39e-11	-3.09e-11	-2.78e-11	-2.93e-11	-2.47e-11	0.0155	-2.3195e-09	-2.32264e-09	-2.31029e-09	-2.28717e-09	-2.27795e-09	-2.26248e-09	-2.29016e-09	-2.31486e-09	-2.31485e-09	0.063315	-2.62308e-11	-1.08002e-11	-1.85166e-11	-2.00554e-11	-3.09276e-12	-1.23536e-11	-9.26083e-12	-3.39528e-11	-2.77735e-11
0.06432	-4.32131e-11	-2.00661e-11	-2.6233e-11	-5.09205e-11	-3.39528e-11	-2.77791e-11	-2.77808e-11	-2.00678e-11	-2.77797e-11	0.01575	-1.06432e-10	-1.0961e-10	-1.1413e-10	-1.12769e-10	-1.18833e-10	-1.18933e-10	-1.11107e-10	-1.15655e-10	-1.31152e-10	0.06432	-1.7e-11	-1.85e-11	-6.17e-12	-1.7e-11	-7.72e-12	-3.86e-11	-2.32e-11	-3.24e-11	-2.01e-11	0.01575	-2.30725e-09	-2.31033e-09	-2.30412e-09	-2.28395e-09	-2.27786e-09	-2.26395e-09	-2.28241e-09	-2.30262e-09	-2.30573e-09	0.06432	-1.54351e-11	-1.23429e-11	-1.54323e-11	-1.08092e-11	-1.07974e-11	-2.4688e-11	-1.543e-11	-4.16625e-11	-1.85284e-11
0.065325	-4.01259e-11	-2.16032e-11	-2.31515e-11	-3.85855e-11	-3.24067e-11	-3.08657e-11	-3.24078e-11	-3.39494e-11	-3.24095e-11	0.016	-1.04961e-10	-1.11107e-10	-1.08066e-10	-1.23353e-10	-1.20349e-10	-1.34093e-10	-1.08039e-10	-1.09591e-10	-1.32686e-10	0.065325	-2.01e-11	-1.55e-12	4.62e-12	-1.7e-11	-2.16e-11	-2.78e-11	-3.09e-11	-4.01e-11	-3.24e-11	0.016	-2.30111e-09	-2.30411e-09	-2.29794e-09	-2.26259e-09	-2.27327e-09	-2.25781e-09	-2.25647e-09	-2.29796e-09	-2.30715e-09	0.065325	-1.08019e-11	-4.63999e-12	-1.08041e-11	-1.85149e-11	-3.0922e-12	-2.46959e-11	-1.38912e-11	-3.24118e-11	-3.3946e-11
0.06633	-3.85832e-11	-1.54351e-11	-2.62358e-11	-3.54978e-11	-2.46942e-11	-3.39534e-11	-3.39573e-11	-4.01203e-11	-3.85776e-11	0.01625	-1.06459e-10	-1.11062e-10	-1.07975e-10	-1.15792e-10	-1.17317e-10	-1.20431e-10	-1.06505e-10	-1.06496e-10	-1.28093e-10	0.06633	-1.08e-11	-7.71e-12	-3.09e-12	-1.7e-11	-2.31e-11	-2.78e-11	-3.24e-11	-2.62e-11	-3.4e-11	0.01625	-2.30712e-09	-2.29651e-09	-2.29024e-09	-2.26399e-09	-2.2702e-09	-2.24863e-09	-2.26233e-09	-2.29491e-09	-2.29799e-09	0.06633	-3.09051e-12	-2.46813e-11	-9.2597e-12	-1.38901e-11	-1.07957e-11	-3.39477e-11	-1.69761e-11	-3.08674e-11	-3.24078e-11
0.067335	-4.01203e-11	-1.5434e-11	-2.93224e-11	-3.85753e-11	-2.16048e-11	-4.01248e-11	-4.93749e-11	-3.24118e-11	-3.24129e-11	0.0165	-1.03409e-10	-1.01911e-10	-9.88429e-11	-1.15737e-10	-1.18851e-10	-1.15828e-10	-1.08103e-10	-1.05007e-10	-1.23508e-10	0.067335	-4.63e-12	-3.09e-12	-1.23e-11	-2.47e-11	-1.7e-11	-2.47e-11	-3.7e-11	-2.78e-11	-3.24e-11	0.0165	-2.29789e-09	-2.30549e-09	-2.28404e-09	-2.26398e-09	-2.27167e-09	-2.25e-09	-2.24708e-09	-2.29941e-09	-2.29637e-09	0.067335	-6.17257e-12	-1.3898e-11	-7.71754e-12	-1.08075e-11	1.53315e-12	-3.08657e-11	-2.00593e-11	-3.395e-11	-2.77791e-11
0.06834	-2.77797e-11	-1.85183e-11	-3.2409e-11	-2.3156e-11	-1.54362e-11	-4.47547e-11	-3.70467e-11	-3.24118e-11	-3.70411e-11	0.01675	-1.0182e-10	-1.01939e-10	-1.01884e-10	-1.14221e-10	-1.23372e-10	-1.24924e-10	-1.21837e-10	-1.14157e-10	-1.26531e-10	0.06834	-3.09e-12	-9.26e-12	-1.85e-11	-3.24e-11	-3.24e-11	-2.93e-11	-2.47e-11	-3.09e-11	-3.86e-11	0.01675	-2.27809e-09	-2.2857e-09	-2.27483e-09	-2.26086e-09	-2.2655e-09	-2.23321e-09	-2.24091e-09	-2.29025e-09	-2.28873e-09	0.06834	-7.71473e-12	-2.62313e-11	-9.25801e-12	-2.00599e-11	-1.38845e-11	-2.77802e-11	-1.39008e-11	-3.08617e-11	-2.31509e-11
0.069345	-1.69795e-11	-1.85211e-11	-3.54933e-11	-2.62324e-11	-1.85177e-11	-4.78395e-11	-4.62946e-11	-4.01254e-11	-4.78362e-11	0.017	-9.42495e-11	-1.1561e-10	-1.09564e-10	-1.15728e-10	-1.12787e-10	-1.2034e-10	-1.2191e-10	-1.1571e-10	-1.26504e-10	0.069345	-7.72e-12	-9.26e-12	-2.16e-11	-2.62e-11	-2.93e-11	-3.09e-11	-2.78e-11	-1.7e-11	-3.09e-11	0.017	-2.29165e-09	-2.28249e-09	-2.27017e-09	-2.25013e-09	-2.25328e-09	-2.23004e-09	-2.2454e-09	-2.28405e-09	-2.28866e-09	0.069345	-4.63267e-12	-2.62375e-11	-6.17539e-12	-2.16071e-11	-1.5434e-11	-2.77774e-11	-3.85742e-11	-1.69812e-11	-2.31459e-11
0.07035	-1.54368e-11	-2.31504e-11	-3.24101e-11	-2.00694e-11	-1.69761e-11	-4.47569e-11	-4.47563e-11	-4.78384e-11	-4.32159e-11	0.01725	-1.04852e-10	-1.06541e-10	-1.15683e-10	-1.14194e-10	-1.23335e-10	-1.09682e-10	-1.20394e-10	-1.11135e-10	-1.18915e-10	0.07035	-1.39e-11	-1.85e-11	-3.09e-11	-3.55e-11	-3.09e-11	-1.39e-11	-2.47e-11	-1.7e-11	-2.47e-11	0.01725	-2.28408e-09	-2.27479e-09	-2.26553e-09	-2.24392e-09	-2.25622e-09	-2.22541e-09	-2.23628e-09	-2.27635e-09	-2.28408e-09	0.07035	-9.26252e-12	-3.0864e-11	-9.26083e-12	-2.62358e-11	-2.0061e-11	-2.31521e-11	-4.16642e-11	-1.6975e-11	-1.38952e-11
0.071355	-2.46863e-11	-3.08651e-11	-3.24118e-11	-3.24022e-11	-1.54379e-11	-4.62985e-11	-4.62985e-11	-4.62974e-11	-4.93834e-11	0.0175	-1.00341e-10	-1.0645e-10	-1.11162e-10	-1.11171e-10	-1.1276e-10	-1.17235e-10	-1.2191e-10	-1.096e-10	-1.2496e-10	0.071355	-1.54e-11	-2.31e-11	-2.62e-11	-2.62e-11	-3.86e-11	-1.85e-11	-2.16e-11	-1.39e-11	-1.85e-11	0.0175	-2.27941e-09	-2.26559e-09	-2.25933e-09	-2.23472e-09	-2.24855e-09	-2.22076e-09	-2.23775e-09	-2.27022e-09	-2.28244e-09	0.071355	-2.15998e-11	-3.08691e-11	-1.54323e-11	-3.08657e-11	-2.00616e-11	-2.62353e-11	-3.24101e-11	-1.38935e-11	-2.00587e-11
0.07236	-1.69806e-11	-3.70366e-11	-4.01237e-11	-2.62353e-11	-2.77718e-11	-4.78373e-11	-4.78401e-11	-4.1672e-11	-5.09261e-11	0.01775	-1.0035e-10	-1.00377e-10	-1.14148e-10	-1.17226e-10	-1.18796e-10	-1.15746e-10	-1.2191e-10	-1.12669e-10	-1.23472e-10	0.07236	-1.7e-11	-2.78e-11	-3.4e-11	-2.93e-11	-4.32e-11	-1.7e-11	-1.85e-11	-1.55e-12	-1.24e-11	0.01775	-2.27172e-09	-2.26399e-09	-2.24708e-09	-2.23308e-09	-2.23776e-09	-2.21154e-09	-2.23776e-09	-2.27328e-09	-2.26872e-09	0.07236	-1.69767e-11	-4.01214e-11	-2.00627e-11	-3.54916e-11	-1.69829e-11	-2.77752e-11	-2.62409e-11	-2.15986e-11	-1.54323e-11
0.073365	-2.16032e-11	-3.70427e-11	-4.32102e-11	-1.85256e-11	-2.00694e-11	-3.70427e-11	-4.47535e-11	-4.62946e-11	-4.62985e-11	0.018	-1.06432e-10	-1.04989e-10	-1.08039e-10	-1.12687e-10	-1.18869e-10	-1.14221e-10	-1.20385e-10	-1.17262e-10	-1.23435e-10	0.073365	-2.62e-11	-2.47e-11	-3.7e-11	-2.93e-11	-4.01e-11	-1.85e-11	-1.56e-12	-7.71e-12	-1.7e-11	0.018	-2.26553e-09	-2.2609e-09	-2.24397e-09	-2.2224e-09	-2.227e-09	-2.2054e-09	-2.23772e-09	-2.28078e-09	-2.2701e-09	0.073365	-1.38935e-11	-3.85765e-11	-2.46925e-11	-2.93235e-11	-3.24028e-11	-1.852e-11	-3.39472e-11	-9.26589e-12	-9.26533e-12
0.07437	-1.85194e-11	-4.78328e-11	-4.16664e-11	-2.77769e-11	-3.08645e-11	-3.70382e-11	-3.70394e-11	-4.01248e-11	-4.16698e-11	0.01825	-1.034e-10	-1.17144e-10	-1.03464e-10	-1.12732e-10	-1.2496e-10	-1.15719e-10	-1.20349e-10	-1.17299e-10	-1.18878e-10	0.07437	-3.39e-11	-4.17e-11	-2.78e-11	-3.24e-11	-3.55e-11	-7.72e-12	-1.7e-11	-9.26e-12	-1.85e-11	0.01825	-2.25776e-09	-2.2562e-09	-2.24696e-09	-2.22381e-09	-2.22382e-09	-2.2068e-09	-2.23155e-09	-2.25649e-09	-2.25946e-09	0.07437	-2.16054e-11	-2.16133e-11	-2.93207e-11	-2.6233e-11	-3.08679e-11	-1.08097e-11	-2.77785e-11	-1.38862e-11	-1.85138e-11
0.075375	-1.54396e-11	-3.39596e-11	-3.39534e-11	-3.08623e-11	-3.85776e-11	-3.54933e-11	-3.08662e-11	-3.24123e-11	-4.01242e-11	0.0185	-1.00368e-10	-1.05025e-10	-1.09564e-10	-1.2486e-10	-1.23426e-10	-1.12742e-10	-1.15792e-10	-1.18787e-10	-1.21892e-10	0.075375	-3.09e-11	-3.55e-11	-2.31e-11	-2.01e-11	-3.7e-11	-3.09e-12	-2.01e-11	-1.54e-11	-1.39e-11	0.0185	-2.2395e-09	-2.23792e-09	-2.23939e-09	-2.21465e-09	-2.21161e-09	-2.19312e-09	-2.21929e-09	-2.26698e-09	-2.26396e-09	0.075375	-2.77763e-11	-2.46897e-11	-2.9323e-11	-1.54385e-11	-3.54899e-11	-2.15975e-11	-2.00661e-11	-9.2642e-12	-1.23496e-11
0.07638	-3.08589e-11	-4.01209e-11	-2.93218e-11	-2.46959e-11	-3.39551e-11	-2.77802e-11	-2.62358e-11	-3.39489e-11	-3.5495e-11	0.01875	-1.06459e-10	-1.06505e-10	-1.14139e-10	-1.12751e-10	-1.15837e-10	-1.23308e-10	-1.18796e-10	-1.12714e-10	-1.20403e-10	0.07638	-3.24e-11	-2.47e-11	-2.01e-11	-1.54e-11	-3.7e-11	-9.26e-12	-1.08e-11	-1.7e-11	-1.55e-12	0.01875	-2.25305e-09	-2.24695e-09	-2.24542e-09	-2.21147e-09	-2.21301e-09	-2.1991e-09	-2.21452e-09	-2.2609e-09	-2.26238e-09	0.07638	-2.62353e-11	-2.00621e-11	-3.08651e-11	-2.00599e-11	-2.46948e-11	-9.26702e-12	-2.16037e-11	-1.69727e-11	-1.54289e-11
0.077385	-2.77819e-11	-3.39556e-11	-2.31504e-11	-2.77808e-11	-3.70382e-11	-2.31526e-11	-2.16077e-11	-2.62375e-11	-2.93258e-11	0.019	-1.08012e-10	-1.11053e-10	-1.08094e-10	-1.1571e-10	-1.23408e-10	-1.08157e-10	-1.15737e-10	-1.15774e-10	-1.23435e-10	0.077385	-3.09e-11	-3.09e-11	-2.47e-11	-3.09e-12	-2.62e-11	-7.72e-12	-9.26e-12	-1.39e-11	-6.17e-12	0.019	-2.24238e-09	-2.24391e-09	-2.24231e-09	-2.19926e-09	-2.20536e-09	-2.19151e-09	-2.19467e-09	-2.25319e-09	-2.24861e-09	0.077385	-2.31521e-11	-1.38918e-11	-3.08657e-11	-1.69761e-11	-2.00638e-11	-1.69733e-11	-1.69772e-11	-1.54357e-11	-7.72148e-12
0.07839	-3.24106e-11	-3.70354e-11	-2.00661e-11	-3.54933e-11	-3.85804e-11	-2.77797e-11	-2.16065e-11	-2.31504e-11	-3.24078e-11	0.01925	-1.06496e-10	-1.04961e-10	-1.12632e-10	-1.12678e-10	-1.21892e-10	-1.14157e-10	-1.11144e-10	-1.23372e-10	-1.21919e-10	0.07839	-4.63e-11	-2.62e-11	-2.01e-11	-1.23e-11	-1.85e-11	-7.72e-12	-1.23e-11	-1.55e-12	-3.09e-12	0.01925	-2.23019e-09	-2.23627e-09	-2.22551e-09	-2.20067e-09	-2.19912e-09	-2.19145e-09	-2.19456e-09	-2.24552e-09	-2.24245e-09	0.07839	-2.77791e-11	-1.38879e-11	-3.0864e-11	-1.38901e-11	-1.85211e-11	-1.69744e-11	-1.5434e-11	-2.16032e-11	-1.38896e-11
0.079395	-4.16642e-11	-3.08662e-11	-2.6233e-11	-3.70366e-11	-3.54989e-11	-3.3946e-11	-2.3147e-11	-2.31504e-11	-3.24067e-11	0.0195	-1.06496e-10	-1.01929e-10	-1.12651e-10	-1.1266e-10	-1.15774e-10	-1.12651e-10	-1.11135e-10	-1.15819e-10	-1.20367e-10	0.079395	-4.17e-11	-2.01e-11	-9.26e-12	-1.39e-11	-2.01e-11	-1.39e-11	-1.54e-11	-1.85e-11	-1.7e-11	0.0195	-2.24228e-09	-2.23773e-09	-2.22536e-09	-2.19294e-09	-2.1839e-09	-2.18992e-09	-2.19609e-09	-2.24543e-09	-2.24544e-09	0.079395	-3.24005e-11	-9.26195e-12	-2.62347e-11	-1.23463e-11	-2.16015e-11	-1.23508e-11	-1.69744e-11	-2.00616e-11	-2.00649e-11
0.0804	-3.85827e-11	-2.62375e-11	-2.46914e-11	-3.24129e-11	-4.16642e-11	-2.31521e-11	-1.85233e-11	-2.62341e-11	-2.62375e-11	0.01975	-1.0803e-10	-1.11007e-10	-1.11126e-10	-1.12651e-10	-1.14221e-10	-1.09628e-10	-1.14239e-10	-1.20331e-10	-1.17317e-10	0.0804	-2.78e-11	-2.62e-11	-1.08e-11	-9.27e-12	-1.85e-11	-2.01e-11	-1.85e-11	-2.62e-11	-1.08e-11	0.01975	-2.23623e-09	-2.23464e-09	-2.21619e-09	-2.17463e-09	-2.19444e-09	-2.18838e-09	-2.19759e-09	-2.2378e-09	-2.24236e-09	0.0804	-1.38969e-11	-1.08013e-11	-1.85233e-11	-1.08041e-11	-1.2353e-11	-2.00587e-11	-1.38896e-11	-1.54379e-11	-3.24016e-11
0.081405	-3.70394e-11	-2.62358e-11	-2.00661e-11	-3.85798e-11	-3.54983e-11	-2.00672e-11	-2.46897e-11	-2.46937e-11	-2.46925e-11	0.02	-1.09573e-10	-1.01884e-10	-1.11126e-10	-1.11135e-10	-1.15728e-10	-1.15719e-10	-1.23344e-10	-1.17317e-10	-1.1886e-10	0.081405	-2.78e-11	-2.47e-11	-7.72e-12	-2.31e-11	-1.7e-11	-2.47e-11	-2.31e-11	-2.62e-11	-1.7e-11	0.02	-2.23158e-09	-2.22543e-09	-2.21307e-09	-2.18058e-09	-2.18686e-09	-2.18676e-09	-2.19148e-09	-2.2362e-09	-2.23465e-09	0.081405	-1.54345e-11	-7.71811e-12	-2.16048e-11	-1.23463e-11	-2.16026e-11	-1.69761e-11	-1.08047e-11	-2.46948e-11	-2.46965e-11
0.08241	-3.70382e-11	-2.62336e-11	-2.46931e-11	-3.85827e-11	-3.70382e-11	-2.93179e-11	-2.31532e-11	-2.62347e-11	-2.31504e-11	0.02025	-1.11062e-10	-9.72996e-11	-1.12614e-10	-1.12651e-10	-1.14221e-10	-1.17271e-10	-1.12696e-10	-1.18815e-10	-1.24915e-10	0.08241	-2.31e-11	-1.39e-11	-1.55e-12	-1.23e-11	-9.27e-12	-2.78e-11	-2.62e-11	-2.47e-11	-2.31e-11	0.02025	-2.22537e-09	-2.21927e-09	-2.20993e-09	-2.17292e-09	-2.1838e-09	-2.17303e-09	-2.18844e-09	-2.23157e-09	-2.22236e-09	0.08241	-2.16026e-11	-9.2597e-12	-2.1602e-11	-1.38879e-11	-2.16003e-11	-1.38912e-11	-1.23423e-11	-4.01152e-11	-2.7778e-11
0.083415	-3.54989e-11	-2.00638e-11	-3.08629e-11	-4.01299e-11	-3.70388e-11	-2.62369e-11	-3.24033e-11	-2.46942e-11	-2.46925e-11	0.0205	-1.03464e-10	-1.04861e-10	-1.0655e-10	-1.12632e-10	-1.15692e-10	-1.15746e-10	-1.08121e-10	-1.17408e-10	-1.1581e-10	0.083415	-1.7e-11	-1.23e-11	-6.17e-12	-9.26e-12	-2.01e-11	-2.62e-11	-3.4e-11	-3.55e-11	-2.62e-11	0.0205	-2.21159e-09	-2.21767e-09	-2.19778e-09	-2.1622e-09	-2.18973e-09	-2.17447e-09	-2.19597e-09	-2.22386e-09	-2.21616e-09	0.083415	-1.85183e-11	-1.08007e-11	-1.08058e-11	-1.08024e-11	-6.17708e-12	-1.54379e-11	-3.09276e-12	-2.7787e-11	-2.77797e-11
0.08442	-4.32074e-11	-1.69778e-11	-2.93224e-11	-5.40059e-11	-3.70399e-11	-2.62409e-11	-2.62426e-11	-2.77825e-11	-2.62369e-11	0.02075	-1.06459e-10	-9.88429e-11	-1.11098e-10	-1.08048e-10	-1.08112e-10	-1.14176e-10	-1.18787e-10	-1.35609e-10	-1.17326e-10	0.08442	-9.26e-12	-3.09e-12	-7.71e-12	-1.08e-11	-2.31e-11	-3.86e-11	-3.55e-11	-4.47e-11	-2.93e-11	0.02075	-2.20854e-09	-2.21153e-09	-2.20982e-09	-2.16202e-09	-2.16382e-09	-2.17295e-09	-2.18378e-09	-2.21461e-09	-2.20999e-09	0.08442	-1.23457e-11	-6.17764e-12	-7.71811e-12	-6.17708e-12	-1.55117e-12	-3.08589e-11	-1.08007e-11	-3.70343e-11	-2.93196e-11
0.085425	-3.85849e-11	-1.85188e-11	-2.77808e-11	-4.32164e-11	-4.01169e-11	-4.01181e-11	-3.85731e-11	-4.01192e-11	-3.08629e-11	0.021	-1.04971e-10	-1.04952e-10	-1.12632e-10	-1.06541e-10	-1.14212e-10	-1.08075e-10	-1.21856e-10	-1.20449e-10	-1.24951e-10	0.085425	-7.72e-12	-1.54e-12	-1.55e-12	-1.85e-11	-1.08e-11	-3.24e-11	-3.7e-11	-2.78e-11	-3.09e-11	0.021	-2.2222e-09	-2.20691e-09	-2.19468e-09	-2.1422e-09	-2.16053e-09	-2.17295e-09	-2.17759e-09	-2.20542e-09	-2.20538e-09	0.085425	-4.63717e-12	-1.38828e-11	-9.25576e-12	-1.23446e-11	-1.85121e-11	-2.77819e-11	-1.23502e-11	-3.39528e-11	-2.31526e-11
0.08643	-4.16619e-11	-1.852e-11	-3.08612e-11	-4.47502e-11	-2.00751e-11	-3.3959e-11	-2.62448e-11	-3.54961e-11	-2.77836e-11	0.02125	-1.08012e-10	-1.12578e-10	-1.09591e-10	-1.14157e-10	-1.2181e-10	-1.0961e-10	-1.14276e-10	-1.17308e-10	-1.23463e-10	0.08643	-1.08e-11	-3.94e-15	-1.23e-11	-2.31e-11	-1.24e-11	-3.7e-11	-2.93e-11	-2.78e-11	-2.93e-11	0.02125	-2.21459e-09	-2.2053e-09	-2.20062e-09	-2.14366e-09	-2.1468e-09	-2.17441e-09	-2.17443e-09	-2.20685e-09	-2.20532e-09	0.08643	-1.69682e-11	-3.09952e-12	-6.19332e-15	-1.38929e-11	-1.54295e-11	-3.24067e-11	-2.46863e-11	-3.24073e-11	-2.62324e-11
0.087435	-2.62398e-11	-2.00616e-11	-2.1615e-11	-3.24129e-11	-3.39466e-11	-4.62895e-11	-3.85787e-11	-3.24118e-11	-3.70366e-11	0.0215	-1.08012e-10	-1.06523e-10	-1.09582e-10	-1.14167e-10	-1.11189e-10	-1.17217e-10	-1.18806e-10	-1.17317e-10	-1.21974e-10	0.087435	-7.72e-12	-9.26e-12	-6.18e-12	-2.78e-11	-2.78e-11	-2.93e-11	-3.86e-11	-2.16e-11	-1.7e-11	0.0215	-2.20381e-09	-2.19454e-09	-2.18991e-09	-2.15134e-09	-2.14822e-09	-2.16374e-09	-2.16226e-09	-2.20072e-09	-2.2007e-09	0.087435	-7.72205e-12	-2.77667e-11	-7.71473e-12	-2.46869e-11	-3.09501e-12	-3.08662e-11	-2.00672e-11	-2.62353e-11	-2.00678e-11
0.08844	-2.16071e-11	-1.85217e-11	-3.70315e-11	-3.08629e-11	-3.24073e-11	-3.39629e-11	-4.16681e-11	-3.70371e-11	-4.01254e-11	0.02175	-1.04961e-10	-1.06505e-10	-1.11153e-10	-1.08112e-10	-1.12678e-10	-1.12678e-10	-1.18787e-10	-1.21883e-10	-1.29527e-10	0.08844	-7.72e-12	-9.26e-12	-1.85e-11	-3.39e-11	-2.32e-11	-3.39e-11	-3.7e-11	-2.16e-11	-3.09e-11	0.02175	-2.19307e-09	-2.18219e-09	-2.1776e-09	-2.15895e-09	-2.14516e-09	-2.16212e-09	-2.16981e-09	-2.19459e-09	-2.19302e-09	0.08844	-1.38845e-11	-1.85267e-11	-1.0803e-11	-2.00649e-11	-1.38884e-11	-3.08657e-11	-2.7774e-11	-1.85239e-11	-2.77774e-11
0.089445	-2.00621e-11	-2.31493e-11	-3.24146e-11	-2.16099e-11	-2.62375e-11	-5.09177e-11	-4.32125e-11	-3.70416e-11	-4.32125e-11	0.022	-1.04952e-10	-1.09519e-10	-1.18751e-10	-1.15619e-10	-1.17262e-10	-1.11107e-10	-1.11198e-10	-1.20367e-10	-1.18878e-10	0.089445	-1.23e-11	-1.08e-11	-2.62e-11	-3.24e-11	-2.62e-11	-2.47e-11	-3.86e-11	-2.01e-11	-3.24e-11	0.022	-2.19299e-09	-2.16843e-09	-2.1699e-09	-2.14982e-09	-2.14216e-09	-2.15753e-09	-2.16984e-09	-2.19458e-09	-2.18841e-09	0.089445	-6.1782e-12	-2.93173e-11	-1.38873e-11	-2.16077e-11	-2.16071e-11	-3.0864e-11	-2.16105e-11	-2.31453e-11	-3.086e-11
0.09045	-1.69784e-11	-2.77774e-11	-4.32069e-11	-2.31498e-11	-2.46937e-11	-3.85894e-11	-4.62974e-11	-4.47563e-11	-4.78412e-11	0.02225	-1.0645e-10	-1.03473e-10	-1.12641e-10	-1.02002e-10	-1.17253e-10	-1.08039e-10	-1.17199e-10	-1.17308e-10	-1.15774e-10	0.09045	-1.54e-11	-1.23e-11	-2.47e-11	-2.78e-11	-3.55e-11	-1.08e-11	-2.47e-11	-2.16e-11	-2.01e-11	0.02225	-2.18996e-09	-2.1744e-09	-2.16986e-09	-2.14507e-09	-2.15276e-09	-2.15589e-09	-2.16676e-09	-2.19907e-09	-2.18987e-09	0.09045	-1.23446e-11	-2.62364e-11	-1.08035e-11	-2.77774e-11	-3.23999e-11	-2.62414e-11	-2.77785e-11	-1.69784e-11	-1.85262e-11
0.091455	-2.00599e-11	-2.77802e-11	-4.01259e-11	-2.62369e-11	-2.62386e-11	-4.62923e-11	-4.62979e-11	-5.55481e-11	-5.09227e-11	0.0225	-1.01893e-10	-1.09519e-10	-1.03509e-10	-1.12596e-10	-1.11189e-10	-1.06496e-10	-1.08066e-10	-1.17271e-10	-1.17262e-10	0.091455	-1.24e-11	-2.01e-11	-3.09e-11	-3.24e-11	-4.01e-11	-1.23e-11	-1.85e-11	-1.39e-11	-1.85e-11	0.0225	-2.1945e-09	-2.16675e-09	-2.16981e-09	-2.12531e-09	-2.14364e-09	-2.14218e-09	-2.16211e-09	-2.18535e-09	-2.18382e-09	0.091455	-1.38862e-11	-2.4697e-11	-9.26364e-12	-2.93207e-11	-1.85267e-11	-3.70298e-11	-3.24084e-11	-1.69761e-11	-2.46863e-11
0.09246	-1.54396e-11	-3.08696e-11	-3.85843e-11	-3.24028e-11	-3.54899e-11	-3.7045e-11	-4.47547e-11	-3.85922e-11	-3.85866e-11	0.02275	-1.03409e-10	-1.06559e-10	-1.12587e-10	-1.1266e-10	-1.17217e-10	-1.06487e-10	-1.05007e-10	-1.14212e-10	-1.1423e-10	0.09246	-2.16e-11	-2.16e-11	-3.24e-11	-2.62e-11	-2.78e-11	-1.85e-11	-2.01e-11	-7.72e-12	-1.85e-11	0.02275	-2.19145e-09	-2.15599e-09	-2.16218e-09	-2.14035e-09	-2.13757e-09	-2.1451e-09	-2.15292e-09	-2.18209e-09	-2.18976e-09	0.09246	-6.18045e-12	-3.54882e-11	-1.85177e-11	-2.62381e-11	-2.46925e-11	-2.31532e-11	-3.54916e-11	-1.69744e-11	-1.38929e-11
0.093465	-2.93134e-11	-4.47479e-11	-4.32091e-11	-2.16065e-11	-2.93235e-11	-4.47502e-11	-4.16653e-11	-4.93778e-11	-3.85872e-11	0.023	-1.06414e-10	-1.15582e-10	-1.0961e-10	-1.12669e-10	-1.11207e-10	-1.06496e-10	-1.12632e-10	-1.12723e-10	-1.15728e-10	0.093465	-2.16e-11	-3.24e-11	-3.4e-11	-2.47e-11	-3.7e-11	-1.24e-11	-1.54e-11	-6.17e-12	-1.08e-11	0.023	-2.18682e-09	-2.14989e-09	-2.16062e-09	-2.12514e-09	-2.15121e-09	-2.13747e-09	-2.14976e-09	-2.16075e-09	-2.16845e-09	0.093465	-1.85177e-11	-2.62398e-11	-2.31498e-11	-2.93168e-11	-3.08629e-11	-2.00621e-11	-2.77819e-11	-1.23496e-11	-1.23502e-11
0.09447	-1.85233e-11	-3.85832e-11	-4.01231e-11	-1.23542e-11	-2.62369e-11	-3.85832e-11	-2.93275e-11	-4.01265e-11	-5.24626e-11	0.02325	-9.73269e-11	-9.73906e-11	-1.12651e-10	-1.14176e-10	-1.20294e-10	-1.08048e-10	-1.15728e-10	-1.21874e-10	-1.14212e-10	0.09447	-3.09e-11	-3.09e-11	-3.86e-11	-2.16e-11	-2.62e-11	-1.7e-11	-1.54e-11	-1.54e-12	-1.08e-11	0.02325	-2.18071e-09	-2.16046e-09	-2.16357e-09	-2.11596e-09	-2.1436e-09	-2.1344e-09	-2.14061e-09	-2.16516e-09	-2.16981e-09	0.09447	-2.62313e-11	-2.77757e-11	-2.93184e-11	-1.6984e-11	-2.93207e-11	-1.54323e-11	-2.77808e-11	-1.69733e-11	-2.15981e-11
0.095475	-1.85217e-11	-3.54972e-11	-3.08713e-11	-2.4688e-11	-2.62369e-11	-3.54955e-11	-3.08617e-11	-3.39551e-11	-4.16732e-11	0.0235	-1.04861e-10	-1.06477e-10	-1.14185e-10	-1.11153e-10	-1.15783e-10	-1.12632e-10	-1.15701e-10	-1.23426e-10	-1.14185e-10	0.095475	-2.78e-11	-4.01e-11	-4.01e-11	-1.85e-11	-2.47e-11	-1.7e-11	-1.23e-11	-5.07e-15	-1.39e-11	0.0235	-2.18213e-09	-2.14828e-09	-2.14834e-09	-2.12654e-09	-2.13282e-09	-2.13739e-09	-2.14356e-09	-2.15911e-09	-2.16368e-09	0.095475	-2.16077e-11	-2.00649e-11	-2.46942e-11	-2.6233e-11	-2.3156e-11	-9.26308e-12	-3.24033e-11	-1.38896e-11	-9.26477e-12
0.09648	-2.46908e-11	-3.70371e-11	-3.70366e-11	-2.46914e-11	-2.93218e-11	-3.24067e-11	-2.1611e-11	-3.5495e-11	-4.32097e-11	0.02375	-9.87974e-11	-1.14148e-10	-1.12687e-10	-1.14185e-10	-1.17299e-10	-1.12669e-10	-1.08021e-10	-1.18887e-10	-1.11189e-10	0.09648	-4.32e-11	-4.17e-11	-3.09e-11	-7.72e-12	-2.47e-11	-1.39e-11	-7.72e-12	-1.23e-11	-3.09e-12	0.02375	-2.17145e-09	-2.14056e-09	-2.14819e-09	-2.11894e-09	-2.12207e-09	-2.13127e-09	-2.13591e-09	-2.1621e-09	-2.15761e-09	0.09648	-2.16088e-11	-1.85171e-11	-2.46937e-11	-2.77769e-11	-3.54882e-11	-1.2344e-11	-2.16077e-11	-1.08041e-11	-1.08041e-11
0.097485	-2.62398e-11	-3.39545e-11	-3.70354e-11	-2.16122e-11	-3.08674e-11	-2.31549e-11	-2.62341e-11	-3.54899e-11	-3.85838e-11	0.024	-9.73087e-11	-1.12632e-10	-1.1571e-10	-1.14176e-10	-1.20367e-10	-1.14157e-10	-9.88702e-11	-1.23408e-10	-1.20322e-10	0.097485	-3.55e-11	-3.4e-11	-2.62e-11	-1.54e-11	-2.47e-11	-1.08e-11	-1.23e-11	-6.18e-12	-1.08e-11	0.024	-2.1683e-09	-2.1374e-09	-2.13748e-09	-2.11279e-09	-2.12047e-09	-2.12356e-09	-2.12979e-09	-2.15904e-09	-2.1681e-09	0.097485	-2.93179e-11	-1.08069e-11	-2.77752e-11	-2.31476e-11	-2.77797e-11	-9.2642e-12	-1.54334e-11	-1.08035e-11	-1.54317e-11
0.09849	-3.85736e-11	-3.70388e-11	-2.77814e-11	-3.54893e-11	-3.70405e-11	-2.93184e-11	-2.62358e-11	-2.00711e-11	-3.85827e-11	0.02425	-1.09455e-10	-1.06578e-10	-1.12669e-10	-1.09655e-10	-1.21919e-10	-1.08112e-10	-1.06496e-10	-1.18833e-10	-1.2034e-10	0.09849	-4.63e-11	-3.55e-11	-2.01e-11	-6.18e-12	-1.39e-11	-3.24e-11	-1.23e-11	-6.18e-12	-1.39e-11	0.02425	-2.16211e-09	-2.12674e-09	-2.13282e-09	-2.11275e-09	-2.119e-09	-2.11588e-09	-2.13285e-09	-2.15286e-09	-2.14378e-09	0.09849	-2.46948e-11	-1.38862e-11	-2.00683e-11	-1.38901e-11	-2.1611e-11	-1.85143e-11	-1.08047e-11	-1.2348e-11	-1.69778e-11
0.099495	-2.77853e-11	-4.01214e-11	-2.46931e-11	-3.24112e-11	-4.78345e-11	-2.46993e-11	-2.62319e-11	-2.77757e-11	-4.01226e-11	0.0245	-1.0192e-10	-1.15637e-10	-1.11171e-10	-1.18724e-10	-1.23399e-10	-1.15673e-10	-1.15673e-10	-1.14258e-10	-1.1423e-10	0.099495	-3.24e-11	-2.78e-11	-9.27e-12	-1.54e-11	-1.23e-11	-3.55e-11	-7.72e-12	-1.54e-11	-2.01e-11	0.0245	-2.1514e-09	-2.13127e-09	-2.12823e-09	-2.1112e-09	-2.1296e-09	-2.11436e-09	-2.14047e-09	-2.14365e-09	-2.14671e-09	0.099495	-2.62347e-11	-7.71754e-12	-2.77769e-11	-6.17989e-12	-2.93117e-11	-1.38924e-11	-1.08035e-11	-1.85222e-11	-2.31464e-11
0.1005	-3.39511e-11	-3.24095e-11	-2.31476e-11	-3.54961e-11	-3.85894e-11	-3.85731e-11	-1.54424e-11	-2.62358e-11	-3.39528e-11	0.02475	-1.04898e-10	-1.06532e-10	-1.18733e-10	-1.09646e-10	-1.14267e-10	-1.11135e-10	-1.12714e-10	-1.18796e-10	-1.12678e-10	0.1005	-3.55e-11	-2.31e-11	-1.7e-11	-1.39e-11	-1.23e-11	-2.01e-11	-1.39e-11	-2.16e-11	-1.24e-11	0.02475	-2.1513e-09	-2.13423e-09	-2.13119e-09	-2.10811e-09	-2.11898e-09	-2.12349e-09	-2.1374e-09	-2.13905e-09	-2.1497e-09	0.1005	-2.46942e-11	-4.63661e-12	-2.93179e-11	-1.69694e-11	-7.72768e-12	-1.69761e-11	-1.23435e-11	-3.24033e-11	-2.16065e-11
0.101505	-3.70411e-11	-2.62386e-11	-1.69789e-11	-4.01242e-11	-4.93772e-11	-2.7783e-11	-3.08584e-11	-2.46937e-11	-2.93252e-11	0.025	-1.00341e-10	-1.04952e-10	-1.09646e-10	-1.12651e-10	-1.15746e-10	-1.09555e-10	-1.18778e-10	-1.1728e-10	-1.1423e-10	0.101505	-1.7e-11	-1.85e-11	-4.64e-12	-9.26e-12	-2.01e-11	-3.86e-11	-1.85e-11	-2.78e-11	-2.62e-11	0.025	-2.14516e-09	-2.11598e-09	-2.12051e-09	-2.10198e-09	-2.11738e-09	-2.12034e-09	-2.12671e-09	-2.14354e-09	-2.13754e-09	0.101505	-2.7774e-11	-2.00526e-11	-1.85233e-11	-9.26589e-12	-1.69705e-11	-2.00616e-11	-6.17595e-12	-3.08685e-11	-2.16071e-11
0.10251	-4.62918e-11	-2.7778e-11	-1.85205e-11	-4.16687e-11	-3.85849e-11	-2.77769e-11	-2.62358e-11	-2.62369e-11	-3.24061e-11	0.02525	-1.00359e-10	-1.0498e-10	-1.12651e-10	-1.14148e-10	-1.17244e-10	-1.05007e-10	-1.1571e-10	-1.14212e-10	-1.20285e-10	0.10251	-1.85e-11	-2.01e-11	-1.08e-11	-9.26e-12	-1.08e-11	-3.55e-11	-2.31e-11	-2.16e-11	-2.62e-11	0.02525	-2.13905e-09	-2.12037e-09	-2.11581e-09	-2.10041e-09	-2.11428e-09	-2.09444e-09	-2.12659e-09	-2.13437e-09	-2.1405e-09	0.10251	-1.69817e-11	-7.72317e-12	-1.85171e-11	-1.8516e-11	-1.08058e-11	-2.00632e-11	-7.71698e-12	-3.7032e-11	-2.4692e-11
0.103515	-3.70416e-11	-2.62358e-11	-2.31498e-11	-4.32102e-11	-3.54961e-11	-2.16088e-11	-2.16082e-11	-3.08617e-11	-2.77791e-11	0.0255	-1.07966e-10	-1.11098e-10	-1.14148e-10	-1.06505e-10	-1.11217e-10	-1.1108e-10	-1.06578e-10	-1.12732e-10	-1.11198e-10	0.103515	-1.39e-11	-9.26e-12	-1.39e-11	-1.23e-11	-1.7e-11	-3.55e-11	-1.54e-11	-2.62e-11	-2.93e-11	0.0255	-2.142e-09	-2.10817e-09	-2.10664e-09	-2.09883e-09	-2.10808e-09	-2.10192e-09	-2.1174e-09	-2.12675e-09	-2.13737e-09	0.103515	-2.16003e-11	-1.38884e-11	-1.23525e-11	-1.85183e-11	-1.23446e-11	-2.1606e-11	-1.08041e-11	-2.47021e-11	-2.62336e-11
0.10452	-3.54978e-11	-2.4692e-11	-2.93207e-11	-4.01254e-11	-3.39505e-11	-2.31504e-11	-2.31532e-11	-2.46959e-11	-2.31554e-11	0.02575	-1.04989e-10	-1.14148e-10	-1.06568e-10	-1.01948e-10	-1.21856e-10	-1.11107e-10	-1.12641e-10	-1.23381e-10	-1.1571e-10	0.10452	-1.85e-11	-4.63e-12	-1.08e-11	-2.01e-11	-1.7e-11	-3.4e-11	-3.09e-11	-4.01e-11	-3.55e-11	0.02575	-2.13135e-09	-2.10348e-09	-2.10658e-09	-2.09121e-09	-2.09434e-09	-2.10504e-09	-2.11129e-09	-2.13725e-09	-2.12067e-09	0.10452	-1.08035e-11	-1.69739e-11	-2.31408e-11	-1.54334e-11	-9.26195e-12	-2.31526e-11	-1.6975e-11	-3.85753e-11	-2.16127e-11
0.105525	-4.0122e-11	-2.16082e-11	-3.08629e-11	-3.70399e-11	-2.77797e-11	-2.77802e-11	-3.54916e-11	-2.77808e-11	-3.54899e-11	0.026	-1.09491e-10	-1.08048e-10	-1.12587e-10	-1.12587e-10	-1.21928e-10	-1.09564e-10	-1.15755e-10	-1.20358e-10	-1.14221e-10	0.105525	-7.72e-12	-4.63e-12	-1.54e-11	-1.7e-11	-1.39e-11	-4.32e-11	-2.62e-11	-3.24e-11	-3.24e-11	0.026	-2.1328e-09	-2.09581e-09	-2.10654e-09	-2.09414e-09	-2.09886e-09	-2.10805e-09	-2.11881e-09	-2.11444e-09	-2.13732e-09	0.105525	-1.54722e-12	-1.38924e-11	-1.08058e-11	-1.3889e-11	-1.23463e-11	-3.3946e-11	-2.00616e-11	-3.39534e-11	-3.54921e-11
0.10653	-3.54955e-11	-2.4692e-11	-2.46965e-11	-3.70411e-11	-2.31481e-11	-3.54921e-11	-3.70371e-11	-3.54916e-11	-3.24118e-11	0.02625	-1.00359e-10	-1.05025e-10	-1.06487e-10	-1.11135e-10	-1.2339e-10	-1.06514e-10	-1.20322e-10	-1.14258e-10	-1.15728e-10	0.10653	-1.23e-11	-1.39e-11	-3.09e-12	-2.78e-11	-2.78e-11	-3.55e-11	-2.78e-11	-2.62e-11	-3.24e-11	0.02625	-2.13118e-09	-2.09269e-09	-2.09889e-09	-2.08044e-09	-2.10193e-09	-2.09889e-09	-2.10665e-09	-2.11431e-09	-2.13279e-09	0.10653	-3.08882e-12	-1.85171e-11	-6.17989e-12	-1.08075e-11	-1.54289e-11	-2.7783e-11	-2.00672e-11	-3.24073e-11	-4.0122e-11
0.107535	-3.08685e-11	-2.6233e-11	-2.93218e-11	-4.32069e-11	-1.54373e-11	-3.39567e-11	-3.39551e-11	-3.24146e-11	-3.70371e-11	0.0265	-9.87519e-11	-1.15601e-10	-1.00423e-10	-1.1266e-10	-1.12778e-10	-1.08075e-10	-1.15746e-10	-1.17271e-10	-1.14248e-10	0.107535	-7.72e-12	-6.18e-12	-1.23e-11	-2.01e-11	-3.86e-11	-3.24e-11	-3.39e-11	-2.78e-11	-3.24e-11	0.0265	-2.1144e-09	-2.08965e-09	-2.09578e-09	-2.08183e-09	-2.10189e-09	-2.09424e-09	-2.10649e-09	-2.1158e-09	-2.12362e-09	0.107535	-1.08024e-11	-1.69784e-11	-2.00514e-11	-2.00621e-11	-7.72205e-12	-3.2409e-11	-3.24005e-11	-2.62403e-11	-3.54938e-11
0.10854	-3.3946e-11	-2.00627e-11	-3.24101e-11	-3.54955e-11	-2.00621e-11	-4.4749e-11	-3.85832e-11	-4.47535e-11	-3.70405e-11	0.02675	-9.42313e-11	-1.02039e-10	-1.12541e-10	-1.14203e-10	-1.21828e-10	-1.17208e-10	-1.11162e-10	-1.17262e-10	-1.20322e-10	0.10854	-1.55e-12	-1.7e-11	-2.16e-11	-2.47e-11	-3.7e-11	-4.63e-11	-3.09e-11	-2.78e-11	-2.47e-11	0.02675	-2.11433e-09	-2.09417e-09	-2.09273e-09	-2.07424e-09	-2.09117e-09	-2.08957e-09	-2.09119e-09	-2.10963e-09	-2.12505e-09	0.10854	-1.69722e-11	-2.16082e-11	-3.09614e-12	-2.77763e-11	-1.54317e-11	-3.70337e-11	-2.16133e-11	-3.24045e-11	-2.62403e-11
0.109545	-2.00689e-11	-1.38969e-11	-3.85815e-11	-2.77819e-11	-2.31481e-11	-3.85872e-11	-4.62946e-11	-5.24671e-11	-4.16698e-11	0.027	-1.04843e-10	-1.18724e-10	-1.05016e-10	-1.15774e-10	-1.15828e-10	-1.12696e-10	-1.14176e-10	-1.12678e-10	-1.1728e-10	0.109545	-1.54e-11	-1.85e-11	-2.01e-11	-3.24e-11	-4.01e-11	-4.01e-11	-2.16e-11	-1.54e-11	-2.62e-11	0.027	-2.11878e-09	-2.08811e-09	-2.09579e-09	-2.07723e-09	-2.08342e-09	-2.07883e-09	-2.08196e-09	-2.09737e-09	-2.11739e-09	0.109545	-1.2348e-11	-3.2405e-11	-1.23418e-11	-2.7778e-11	-2.00593e-11	-2.77819e-11	-3.08623e-11	-2.62324e-11	-2.93201e-11
0.11055	-2.31481e-11	-2.7778e-11	-4.3208e-11	-2.77757e-11	-2.31498e-11	-4.62963e-11	-4.32131e-11	-4.78429e-11	-4.93828e-11	0.02725	-9.88429e-11	-1.17244e-10	-1.09537e-10	-1.21828e-10	-1.23335e-10	-1.14239e-10	-1.12651e-10	-1.11189e-10	-1.12678e-10	0.11055	-1.39e-11	-1.7e-11	-1.85e-11	-3.24e-11	-4.01e-11	-3.7e-11	-2.93e-11	-1.54e-11	-2.62e-11	0.02725	-2.099e-09	-2.08957e-09	-2.10028e-09	-2.07574e-09	-2.07423e-09	-2.07273e-09	-2.08499e-09	-2.09277e-09	-2.11128e-09	0.11055	-1.23463e-11	-3.24061e-11	-9.26477e-12	-2.46925e-11	-1.54368e-11	-2.62341e-11	-3.08662e-11	-1.08126e-11	-2.62336e-11
0.111555	-2.31521e-11	-3.85765e-11	-3.70433e-11	-1.85239e-11	-2.46925e-11	-4.78401e-11	-4.32102e-11	-4.62996e-11	-5.09272e-11	0.0275	-1.04925e-10	-1.0813e-10	-1.08075e-10	-1.12696e-10	-1.0971e-10	-1.21801e-10	-1.09619e-10	-1.21801e-10	-1.11098e-10	0.111555	-1.39e-11	-1.85e-11	-2.93e-11	-3.24e-11	-3.86e-11	-2.78e-11	-2.01e-11	-1.39e-11	-1.24e-11	0.0275	-2.10196e-09	-2.08504e-09	-2.08347e-09	-2.07872e-09	-2.07413e-09	-2.08338e-09	-2.09108e-09	-2.10028e-09	-2.11573e-09	0.111555	-1.23468e-11	-2.46959e-11	-2.00582e-11	-2.16105e-11	-2.16043e-11	-2.00644e-11	-3.2409e-11	-2.15992e-11	-1.69761e-11
0.11256	-3.08584e-11	-3.39567e-11	-4.32091e-11	-2.16037e-11	-2.62369e-11	-4.47558e-11	-3.85832e-11	-4.78384e-11	-4.93839e-11	0.02775	-1.07975e-10	-1.15683e-10	-1.14139e-10	-1.0961e-10	-1.18742e-10	-1.09682e-10	-1.14085e-10	-1.1276e-10	-1.06505e-10	0.11256	-1.54e-11	-3.39e-11	-3.55e-11	-3.09e-11	-3.4e-11	-1.85e-11	-2.01e-11	-1.08e-11	-9.26e-12	0.02775	-2.10654e-09	-2.0911e-09	-2.07271e-09	-2.06807e-09	-2.06655e-09	-2.08488e-09	-2.08499e-09	-2.0866e-09	-2.10204e-09	0.11256	-1.3889e-11	-2.62336e-11	-1.85205e-11	-3.08612e-11	-2.31521e-11	-1.852e-11	-3.39511e-11	-1.38941e-11	-7.72486e-12
0.113565	-1.85262e-11	-4.16681e-11	-4.16681e-11	-1.85228e-11	-3.08634e-11	-4.32091e-11	-3.70366e-11	-4.01304e-11	-4.47558e-11	0.028	-1.01939e-10	-1.12705e-10	-1.09564e-10	-1.12632e-10	-1.12696e-10	-1.15683e-10	-9.88702e-11	-1.20294e-10	-1.0498e-10	0.113565	-2.31e-11	-3.09e-11	-3.86e-11	-1.7e-11	-4.17e-11	-2.31e-11	-2.01e-11	-7.72e-12	-1.55e-12	0.028	-2.10346e-09	-2.08958e-09	-2.07565e-09	-2.06951e-09	-2.07408e-09	-2.06962e-09	-2.08026e-09	-2.08652e-09	-2.10353e-09	0.113565	-1.38929e-11	-2.16088e-11	-2.00666e-11	-2.77797e-11	-3.24101e-11	-1.85177e-11	-3.2405e-11	-1.85155e-11	-2.15975e-11
0.11457	-2.46875e-11	-4.78384e-11	-3.85815e-11	-2.46903e-11	-2.93218e-11	-3.39584e-11	-2.93286e-11	-4.62951e-11	-4.16709e-11	0.02825	-1.09509e-10	-1.17199e-10	-1.03509e-10	-1.11116e-10	-1.12732e-10	-1.11171e-10	-1.00377e-10	-1.14203e-10	-1.09564e-10	0.11457	-2.78e-11	-3.09e-11	-3.55e-11	-2.78e-11	-3.24e-11	-1.39e-11	-6.18e-12	-1.23e-11	-1.7e-11	0.02825	-2.09425e-09	-2.08346e-09	-2.06804e-09	-2.06496e-09	-2.06647e-09	-2.06648e-09	-2.06191e-09	-2.0865e-09	-2.11113e-09	0.11457	-2.31453e-11	-2.46908e-11	-3.24056e-11	-2.62381e-11	-4.47428e-11	-1.3889e-11	-2.00672e-11	-1.23474e-11	-1.2353e-11
0.115575	-1.69806e-11	-4.47547e-11	-3.39517e-11	-2.4692e-11	-2.62409e-11	-4.16591e-11	-3.8577e-11	-4.32074e-11	-4.47507e-11	0.0285	-1.06459e-10	-1.06523e-10	-1.15628e-10	-1.09664e-10	-1.24879e-10	-1.1571e-10	-1.12541e-10	-1.08057e-10	-1.1266e-10	0.115575	-3.24e-11	-3.24e-11	-4.01e-11	-4.64e-12	-3.55e-11	-2.16e-11	-9.26e-12	-4.63e-12	-1.55e-12	0.0285	-2.0881e-09	-2.08194e-09	-2.06651e-09	-2.06797e-09	-2.0603e-09	-2.06795e-09	-2.05725e-09	-2.08336e-09	-2.10509e-09	0.115575	-2.16088e-11	-2.3147e-11	-3.54921e-11	-3.08617e-11	-2.316e-11	-7.72036e-12	-2.00638e-11	-9.26083e-12	-2.16032e-11
0.11658	-2.16065e-11	-4.01271e-11	-2.77802e-11	-2.31509e-11	-3.70349e-11	-2.31577e-11	-3.39494e-11	-2.77842e-11	-3.54978e-11	0.02875	-9.87974e-11	-1.01929e-10	-1.08075e-10	-1.23326e-10	-1.15819e-10	-1.14239e-10	-1.05034e-10	-1.06541e-10	-1.15673e-10	0.11658	-4.32e-11	-3.86e-11	-2.78e-11	-1.39e-11	-1.7e-11	-2.47e-11	-1.39e-11	-6.17e-12	-1.08e-11	0.02875	-2.08804e-09	-2.08798e-09	-2.0741e-09	-2.06648e-09	-2.05716e-09	-2.06034e-09	-2.06178e-09	-2.0682e-09	-2.10798e-09	0.11658	-2.77763e-11	-1.54362e-11	-2.93224e-11	-2.46931e-11	-3.08612e-11	-1.23451e-11	-2.3147e-11	-9.26308e-12	-2.31453e-11
0.117585	-2.77763e-11	-4.01248e-11	-2.46937e-11	-2.62386e-11	-3.70399e-11	-2.77791e-11	-2.16127e-11	-2.62386e-11	-3.24101e-11	0.029	-9.57473e-11	-1.09573e-10	-1.08057e-10	-1.14294e-10	-1.18842e-10	-1.1876e-10	-1.12569e-10	-1.14157e-10	-1.06587e-10	0.117585	-4.17e-11	-3.55e-11	-2.93e-11	-9.26e-12	-2.16e-11	-2.31e-11	-1.7e-11	-9.26e-12	-9.26e-12	0.029	-2.08344e-09	-2.08037e-09	-2.06952e-09	-2.06949e-09	-2.04798e-09	-2.06179e-09	-2.05878e-09	-2.08634e-09	-2.08667e-09	0.117585	-2.62381e-11	-1.69722e-11	-2.31521e-11	-2.00604e-11	-2.62369e-11	-1.38879e-11	-2.00638e-11	-1.85149e-11	-1.38963e-11
0.11859	-2.62386e-11	-3.8581e-11	-2.46937e-11	-3.70366e-11	-4.01282e-11	-3.24039e-11	-2.77746e-11	-3.24016e-11	-3.24095e-11	0.02925	-1.03382e-10	-1.17189e-10	-1.12596e-10	-1.20258e-10	-1.23335e-10	-1.11162e-10	-1.05025e-10	-1.14185e-10	-1.14103e-10	0.11859	-4.32e-11	-2.62e-11	-2.78e-11	-4.63e-12	-2.16e-11	-1.54e-11	-9.27e-12	-1.23e-11	-1.23e-11	0.02925	-2.08034e-09	-2.07721e-09	-2.0603e-09	-2.06336e-09	-2.0464e-09	-2.05716e-09	-2.0617e-09	-2.07422e-09	-2.08959e-09	0.11859	-3.0864e-11	-7.72205e-12	-2.46903e-11	-9.26589e-12	-2.46908e-11	-1.08069e-11	-2.00632e-11	-1.54357e-11	-2.31436e-11
0.119595	-3.24095e-11	-3.39517e-11	-2.77746e-11	-4.16675e-11	-5.09227e-11	-2.31566e-11	-2.16099e-11	-1.85233e-11	-3.39489e-11	0.0295	-1.08039e-10	-1.08094e-10	-1.0655e-10	-1.06605e-10	-1.06641e-10	-1.11135e-10	-1.11089e-10	-1.11171e-10	-1.05052e-10	0.119595	-3.7e-11	-2.93e-11	-1.54e-11	-1.08e-11	-1.24e-11	-2.47e-11	-2.16e-11	-1.54e-11	-1.23e-11	0.0295	-2.07572e-09	-2.06496e-09	-2.05409e-09	-2.05572e-09	-2.0464e-09	-2.04644e-09	-2.04342e-09	-2.06962e-09	-2.08954e-09	0.119595	-3.08657e-11	-1.38884e-11	-2.00627e-11	-1.54311e-11	-1.85211e-11	-1.85183e-11	-2.1602e-11	-2.00644e-11	-1.69784e-11
0.1206	-4.01242e-11	-2.77802e-11	-1.85262e-11	-4.3208e-11	-4.62968e-11	-3.39455e-11	-2.62336e-11	-1.54379e-11	-2.62398e-11	0.02975	-1.14148e-10	-1.09537e-10	-1.11071e-10	-1.12605e-10	-1.15746e-10	-1.14221e-10	-1.12623e-10	-1.17226e-10	-1.14121e-10	0.1206	-3.24e-11	-2.78e-11	-2.16e-11	-4.63e-12	-1.7e-11	-2.78e-11	-1.39e-11	-2.31e-11	-2.16e-11	0.02975	-2.07104e-09	-2.06035e-09	-2.04494e-09	-2.05863e-09	-2.04787e-09	-2.04335e-09	-2.04332e-09	-2.07719e-09	-2.07892e-09	0.1206	-3.0864e-11	-1.69722e-11	-1.5434e-11	-1.69733e-11	-1.69744e-11	-2.31464e-11	-1.23525e-11	-2.93184e-11	-1.69795e-11
0.121605	-4.47507e-11	-2.46931e-11	-2.77752e-11	-3.39607e-11	-3.70422e-11	-2.62409e-11	-2.46948e-11	-2.62313e-11	-2.93218e-11	0.03	-1.11071e-10	-1.0498e-10	-1.08066e-10	-1.096e-10	-1.24915e-10	-1.20358e-10	-1.08057e-10	-1.12678e-10	-1.09591e-10	0.121605	-3.09e-11	-1.7e-11	-1.24e-11	-9.26e-12	-1.23e-11	-3.09e-11	-9.27e-12	-2.01e-11	-2.16e-11	0.03	-2.05879e-09	-2.06646e-09	-2.05097e-09	-2.04338e-09	-2.0387e-09	-2.04782e-09	-2.04473e-09	-2.07267e-09	-2.08795e-09	0.121605	-2.62369e-11	-9.26477e-12	-1.38929e-11	-1.08024e-11	-1.08075e-11	-2.00616e-11	-2.00576e-11	-2.77808e-11	-2.62291e-11
0.12261	-3.70467e-11	-2.31487e-11	-2.62358e-11	-4.78339e-11	-3.70382e-11	-3.24056e-11	-2.93218e-11	-2.46965e-11	-3.08645e-11	0.03025	-1.0045e-10	-1.06468e-10	-1.11062e-10	-1.11044e-10	-1.18833e-10	-1.23417e-10	-1.08021e-10	-1.11162e-10	-1.0803e-10	0.12261	-2.78e-11	-1.23e-11	-2.01e-11	-1.39e-11	-1.23e-11	-3.86e-11	-2.31e-11	-2.93e-11	-2.47e-11	0.03025	-2.05573e-09	-2.07253e-09	-2.04793e-09	-2.04021e-09	-2.0341e-09	-2.03257e-09	-2.0265e-09	-2.07407e-09	-2.07887e-09	0.12261	-2.46903e-11	-1.54238e-11	-2.16032e-11	-3.09163e-12	-1.69727e-11	-1.38924e-11	-1.38912e-11	-3.08657e-11	-1.69857e-11
0.123615	-5.09182e-11	-2.0061e-11	-2.46925e-11	-4.0131e-11	-3.5495e-11	-2.93235e-11	-3.24078e-11	-3.3946e-11	-2.93241e-11	0.0305	-1.12587e-10	-1.04943e-10	-1.04998e-10	-1.00386e-10	-1.12742e-10	-1.18851e-10	-1.06496e-10	-1.17199e-10	-1.06587e-10	0.123615	-1.39e-11	-1.08e-11	-1.08e-11	-1.54e-11	-2.01e-11	-3.4e-11	-3.24e-11	-2.78e-11	-3.86e-11	0.0305	-2.06472e-09	-2.06192e-09	-2.04333e-09	-2.03559e-09	-2.03861e-09	-2.02796e-09	-2.03702e-09	-2.05888e-09	-2.08022e-09	0.123615	-1.69761e-11	3.07249e-12	-2.16015e-11	-9.26139e-12	-1.38896e-11	-1.54351e-11	-1.23457e-11	-3.39528e-11	-3.39466e-11
0.12462	-3.70433e-11	-1.2353e-11	-2.31504e-11	-4.78373e-11	-3.24095e-11	-2.9323e-11	-3.24123e-11	-2.62403e-11	-3.24078e-11	0.03075	-1.12632e-10	-1.03436e-10	-1.08021e-10	-1.01893e-10	-1.20331e-10	-1.1729e-10	-1.06496e-10	-1.08121e-10	-1.21765e-10	0.12462	-1.54e-11	-6.18e-12	-3.09e-12	-1.24e-11	-1.7e-11	-3.09e-11	-2.93e-11	-3.09e-11	-3.55e-11	0.03075	-2.04189e-09	-2.06639e-09	-2.04186e-09	-2.03099e-09	-2.03256e-09	-2.037e-09	-2.02793e-09	-2.06631e-09	-2.06042e-09	0.12462	-9.26589e-12	-1.69688e-11	-9.26589e-12	-2.00559e-11	-1.0803e-11	-2.31481e-11	-9.26477e-12	-3.85793e-11	-3.54955e-11
0.125625	-3.54989e-11	-2.31464e-11	-2.4692e-11	-4.3208e-11	-3.08668e-11	-3.08668e-11	-4.1663e-11	-3.08623e-11	-3.24095e-11	0.031	-1.08084e-10	-1.07957e-10	-1.095e-10	-1.09528e-10	-1.20349e-10	-1.1571e-10	-1.07993e-10	-1.14148e-10	-1.11217e-10	0.125625	-9.26e-12	-9.26e-12	-1.08e-11	-2.01e-11	-2.16e-11	-4.01e-11	-2.93e-11	-3.39e-11	-3.4e-11	0.031	-2.04023e-09	-2.06026e-09	-2.05548e-09	-2.03092e-09	-2.03551e-09	-2.02331e-09	-2.02788e-09	-2.04951e-09	-2.06329e-09	0.125625	-1.85126e-11	-1.69778e-11	-1.38901e-11	-1.23502e-11	-7.72092e-12	-2.77785e-11	-2.00587e-11	-3.54933e-11	-3.70388e-11
0.12663	-4.32041e-11	-2.62296e-11	-2.46942e-11	-2.7787e-11	-3.24056e-11	-3.54978e-11	-3.54978e-11	-2.62409e-11	-3.39517e-11	0.03125	-1.12623e-10	-1.00395e-10	-9.88338e-11	-1.09619e-10	-1.15755e-10	-1.08103e-10	-1.03409e-10	-1.11098e-10	-1.17217e-10	0.12663	-1.23e-11	-6.18e-12	-1.39e-11	-2.78e-11	-2.93e-11	-3.7e-11	-3.7e-11	-2.16e-11	-3.24e-11	0.03125	-2.04025e-09	-2.04954e-09	-2.04028e-09	-2.02492e-09	-2.02486e-09	-2.02025e-09	-2.02932e-09	-2.03723e-09	-2.05267e-09	0.12663	-9.26364e-12	-2.16015e-11	-2.00554e-11	-1.54334e-11	-1.69716e-11	-3.08645e-11	-2.00672e-11	-2.62392e-11	-3.85798e-11
0.127635	-2.9328e-11	-1.23558e-11	-2.93207e-11	-3.39489e-11	-2.46954e-11	-4.6294e-11	-3.54978e-11	-3.5495e-11	-3.39534e-11	0.0315	-1.11126e-10	-1.06414e-10	-9.88156e-11	-1.17189e-10	-1.12669e-10	-1.12651e-10	-1.00368e-10	-1.05007e-10	-1.11198e-10	0.127635	-4.63e-12	-1.39e-11	-1.23e-11	-2.93e-11	-3.7e-11	-4.01e-11	-3.86e-11	-2.47e-11	-4.01e-11	0.0315	-2.04474e-09	-2.04794e-09	-2.03556e-09	-2.04012e-09	-2.0263e-09	-2.03233e-09	-2.01409e-09	-2.04018e-09	-2.05871e-09	0.127635	-1.08013e-11	-1.38946e-11	-6.18102e-12	-2.00632e-11	-1.38946e-11	-3.08657e-11	-3.24039e-11	-2.62353e-11	-3.39511e-11
0.12864	-3.0864e-11	-2.46875e-11	-2.9328e-11	-3.08674e-11	-2.46908e-11	-4.47558e-11	-4.16675e-11	-4.32119e-11	-3.70411e-11	0.03175	-1.1108e-10	-1.00377e-10	-1.06396e-10	-1.08139e-10	-1.11126e-10	-1.15664e-10	-1.06441e-10	-1.09491e-10	-1.18796e-10	0.12864	1.54e-12	-1.7e-11	-2.01e-11	-3.86e-11	-4.63e-11	-3.09e-11	-3.55e-11	-2.47e-11	-3.09e-11	0.03175	-2.03113e-09	-2.04637e-09	-2.02637e-09	-2.0386e-09	-2.02319e-09	-2.01566e-09	-2.01708e-09	-2.03565e-09	-2.06027e-09	0.12864	-7.71867e-12	-2.00655e-11	-1.38845e-11	-2.62313e-11	-2.46852e-11	-3.08645e-11	-3.08674e-11	-2.46925e-11	-2.62386e-11
0.129645	-2.77802e-11	-2.31538e-11	-4.47496e-11	-3.24039e-11	-2.00661e-11	-4.47535e-11	-4.47507e-11	-5.09244e-11	-4.62951e-11	0.032	-1.04989e-10	-1.0488e-10	-9.88429e-11	-1.17199e-10	-1.11144e-10	-1.05034e-10	-1.04952e-10	-1.00368e-10	-1.2034e-10	0.129645	-1.69e-15	-2.16e-11	-1.85e-11	-3.24e-11	-3.7e-11	-3.24e-11	-2.78e-11	-1.24e-11	-2.47e-11	0.032	-2.04628e-09	-2.04029e-09	-2.02325e-09	-2.02485e-09	-2.01095e-09	-2.02015e-09	-2.02161e-09	-2.04019e-09	-2.06027e-09	0.129645	-1.08007e-11	-3.39444e-11	-7.7243e-12	-2.00678e-11	-1.54362e-11	-2.77825e-11	-3.39483e-11	-2.31487e-11	-2.62358e-11
0.13065	-2.7778e-11	-3.39483e-11	-4.47502e-11	-2.00678e-11	-2.46903e-11	-4.01282e-11	-3.5504e-11	-4.78412e-11	-4.62985e-11	0.03225	-1.06477e-10	-9.88247e-11	-1.03382e-10	-1.11144e-10	-1.15746e-10	-1.095e-10	-1.04961e-10	-1.00368e-10	-1.15792e-10	0.13065	-6.17e-12	-2.16e-11	-2.47e-11	-3.4e-11	-4.48e-11	-2.78e-11	-2.47e-11	-2.01e-11	-2.78e-11	0.03225	-2.04326e-09	-2.04624e-09	-2.02172e-09	-2.0218e-09	-2.00789e-09	-2.02319e-09	-2.01091e-09	-2.04022e-09	-2.05866e-09	0.13065	-7.71698e-12	-2.62409e-11	-2.31442e-11	-2.77774e-11	-1.54362e-11	-3.39489e-11	-2.6242e-11	-2.00627e-11	-2.62369e-11
0.131655	-2.4692e-11	-3.39517e-11	-3.08736e-11	-2.16071e-11	-2.31521e-11	-4.32114e-11	-4.93789e-11	-4.32131e-11	-4.62968e-11	0.0325	-1.06496e-10	-1.01811e-10	-1.04925e-10	-1.09537e-10	-1.20294e-10	-1.01966e-10	-1.07948e-10	-1.09519e-10	-1.18796e-10	0.131655	-1.08e-11	-2.32e-11	-3.24e-11	-3.4e-11	-4.48e-11	-1.85e-11	-2.01e-11	-1.39e-11	-1.24e-11	0.0325	-2.0325e-09	-2.02646e-09	-2.02319e-09	-2.03538e-09	-2.01851e-09	-2.01703e-09	-2.00172e-09	-2.04024e-09	-2.04342e-09	0.131655	-6.17876e-12	-3.24061e-11	-2.46914e-11	-3.08651e-11	-2.46903e-11	-3.08634e-11	-3.54927e-11	-1.69772e-11	-2.93173e-11
0.13266	-2.00661e-11	-3.24135e-11	-3.85793e-11	-2.62302e-11	-2.93207e-11	-4.47535e-11	-4.62974e-11	-4.16726e-11	-4.16715e-11	0.03275	-1.08003e-10	-9.72451e-11	-1.03418e-10	-1.0202e-10	-1.1118e-10	-1.12532e-10	-9.73542e-11	-1.09582e-10	-1.15792e-10	0.13266	-2.16e-11	-2.93e-11	-2.78e-11	-3.4e-11	-4.48e-11	-2.62e-11	-1.54e-11	-1.7e-11	-2.47e-11	0.03275	-2.02174e-09	-2.02789e-09	-2.01557e-09	-2.01408e-09	-2.01091e-09	-2.00331e-09	-2.00626e-09	-2.04321e-09	-2.04641e-09	0.13266	-2.00627e-11	-3.08668e-11	-2.31515e-11	-3.24078e-11	-2.77791e-11	-2.16065e-11	-3.7036e-11	-1.69756e-11	-1.85217e-11
0.133665	-2.46908e-11	-4.32091e-11	-3.85793e-11	-1.54424e-11	-3.08662e-11	-4.16703e-11	-4.01265e-11	-5.09216e-11	-4.47524e-11	0.033	-1.04943e-10	-9.57473e-11	-1.04907e-10	-1.21728e-10	-1.1266e-10	-1.01893e-10	-1.07975e-10	-1.11044e-10	-1.20358e-10	0.133665	-2.32e-11	-3.55e-11	-3.24e-11	-2.93e-11	-3.86e-11	-1.08e-11	-2.16e-11	-1.08e-11	-9.27e-12	0.033	-2.01707e-09	-2.03245e-09	-2.01545e-09	-2.00779e-09	-2.00473e-09	-2.01081e-09	-2.00935e-09	-2.02954e-09	-2.05245e-09	0.133665	-3.39438e-11	-3.24016e-11	-2.77785e-11	-3.08685e-11	-3.08651e-11	-1.38935e-11	-3.08645e-11	-1.54311e-11	-1.38907e-11
0.13467	-2.4692e-11	-4.62963e-11	-3.08696e-11	-3.08567e-11	-3.39539e-11	-4.32097e-11	-3.70411e-11	-4.16698e-11	-4.01293e-11	0.03325	-1.01948e-10	-1.04952e-10	-1.00395e-10	-1.09619e-10	-1.14148e-10	-9.72996e-11	-1.09491e-10	-1.00459e-10	-1.21883e-10	0.13467	-3.09e-11	-3.7e-11	-3.7e-11	-2.78e-11	-3.4e-11	-1.7e-11	-1.54e-11	-3.09e-12	-1.08e-11	0.03325	-2.01247e-09	-2.02789e-09	-2.00176e-09	-1.99868e-09	-2.00016e-09	-2.00329e-09	-2.01082e-09	-2.03555e-09	-2.03875e-09	0.13467	-2.46954e-11	-1.38997e-11	-3.08623e-11	-3.70326e-11	-3.24095e-11	-1.69739e-11	-2.16099e-11	-9.26195e-12	-1.23485e-11
0.135675	-2.31509e-11	-4.32114e-11	-3.395e-11	-2.16133e-11	-4.16625e-11	-3.8581e-11	-4.01192e-11	-3.54983e-11	-4.62946e-11	0.0335	-1.14076e-10	-1.15573e-10	-1.09491e-10	-1.0498e-10	-1.06587e-10	-1.04907e-10	-9.73815e-11	-1.14048e-10	-1.17308e-10	0.135675	-3.7e-11	-3.7e-11	-3.7e-11	-1.85e-11	-3.09e-11	-1.08e-11	-1.23e-11	-4.63e-12	-1.23e-11	0.0335	-2.01247e-09	-2.02628e-09	-2.00775e-09	-2.01077e-09	-2.00617e-09	-2.01388e-09	-1.9986e-09	-2.03555e-09	-2.03716e-09	0.135675	-2.31538e-11	-2.31459e-11	-2.46931e-11	-2.62386e-11	-3.54927e-11	-1.38912e-11	-2.31481e-11	-9.26308e-12	-1.69716e-11
0.13668	-2.62409e-11	-3.85821e-11	-3.08634e-11	-3.24016e-11	-3.24146e-11	-3.08691e-11	-2.6242e-11	-3.70354e-11	-4.16658e-11	0.03375	-1.04952e-10	-9.73633e-11	-1.04916e-10	-1.06487e-10	-1.15683e-10	-1.0645e-10	-1.11025e-10	-1.01948e-10	-1.15746e-10	0.13668	-3.24e-11	-3.7e-11	-2.78e-11	-1.08e-11	-2.62e-11	-9.27e-12	-1.08e-11	-1.55e-12	-1.7e-11	0.03375	-2.01706e-09	-2.01556e-09	-2.00325e-09	-2.00169e-09	-1.99553e-09	-2.0078e-09	-1.99393e-09	-2.02787e-09	-2.04021e-09	0.13668	-3.39466e-11	-2.31476e-11	-2.00706e-11	-2.31464e-11	-3.08668e-11	-1.54334e-11	-2.16065e-11	-1.85149e-11	-9.26139e-12
0.137685	-4.32012e-11	-3.39539e-11	-2.16105e-11	-2.31583e-11	-3.85827e-11	-3.24095e-11	-2.93218e-11	-2.93246e-11	-2.93269e-11	0.034	-9.72815e-11	-1.01829e-10	-9.57746e-11	-1.0803e-10	-1.14194e-10	-1.0192e-10	-1.09555e-10	-1.04971e-10	-1.14221e-10	0.137685	-4.63e-11	-3.7e-11	-2.16e-11	6.16e-12	-2.47e-11	-2.31e-11	-1.08e-11	-7.72e-12	-2.16e-11	0.034	-2.02008e-09	-2.01088e-09	-2.0108e-09	-2.00161e-09	-1.99543e-09	-2.00016e-09	-1.99082e-09	-2.01867e-09	-2.04175e-09	0.137685	-2.9323e-11	-1.85155e-11	-3.7027e-11	-1.23508e-11	-2.93196e-11	-1.85126e-11	-2.16054e-11	-1.54373e-11	-6.17764e-12
0.13869	-3.08741e-11	-3.39494e-11	-2.4688e-11	-3.85765e-11	-4.62951e-11	-3.54927e-11	-3.08617e-11	-2.77763e-11	-2.93184e-11	0.03425	-9.8761e-11	-1.01829e-10	-1.01802e-10	-1.09591e-10	-1.11162e-10	-1.08012e-10	-1.04934e-10	-1.12632e-10	-1.15774e-10	0.13869	-3.86e-11	-3.7e-11	-2.31e-11	-6.17e-12	-2.31e-11	-1.54e-11	-9.26e-12	-1.7e-11	-1.24e-11	0.03425	-2.00944e-09	-2.00319e-09	-2.00164e-09	-1.99695e-09	-1.98936e-09	-2.00319e-09	-1.98471e-09	-2.01862e-09	-2.04021e-09	0.13869	-2.62353e-11	-3.09389e-12	-2.16172e-11	-1.38862e-11	-2.00638e-11	-3.09445e-12	-2.00621e-11	-2.46863e-11	-1.54295e-11
0.139695	-4.16658e-11	-2.62403e-11	-1.54402e-11	-3.85838e-11	-4.47563e-11	-3.08657e-11	-2.16105e-11	-1.85239e-11	-1.85284e-11	0.0345	-9.87701e-11	-9.72723e-11	-9.87701e-11	-1.14148e-10	-1.15728e-10	-1.11071e-10	-9.88156e-11	-1.15719e-10	-1.21892e-10	0.139695	-3.09e-11	-2.62e-11	-1.39e-11	-9.26e-12	-2.16e-11	-4.01e-11	-1.54e-11	-1.7e-11	-1.39e-11	0.0345	-2.01244e-09	-1.99702e-09	-1.99248e-09	-1.98168e-09	-1.99386e-09	-2.00772e-09	-1.98618e-09	-2.02009e-09	-2.03704e-09	0.139695	-2.16093e-11	-7.71585e-12	-3.70315e-11	-6.17933e-12	-1.38946e-11	-9.26026e-12	-1.69778e-11	-1.69817e-11	-1.54345e-11
0.1407	-4.47552e-11	-3.086e-11	-2.62296e-11	-4.32086e-11	-4.62957e-11	-2.62381e-11	-2.46908e-11	-2.16037e-11	-3.24045e-11	0.03475	-9.8761e-11	-1.00286e-10	-9.57564e-11	-1.09537e-10	-1.17271e-10	-1.06477e-10	-1.00359e-10	-1.14203e-10	-1.23435e-10	0.1407	-3.4e-11	-2.31e-11	-1.54e-11	-3.09e-12	-1.54e-11	-2.93e-11	-1.23e-11	-2.31e-11	-2.16e-11	0.03475	-2.01542e-09	-1.9924e-09	-2.0001e-09	-1.98311e-09	-1.98773e-09	-1.99705e-09	-1.98314e-09	-2.00944e-09	-2.01876e-09	0.1407	-2.6233e-11	-1.08019e-11	-3.24073e-11	-1.54272e-11	-2.15986e-11	-1.69705e-11	-1.85149e-11	-2.46892e-11	-2.00638e-11
0.141705	-4.78395e-11	-2.00661e-11	-2.00644e-11	-3.85843e-11	-4.01293e-11	-2.77769e-11	-2.31481e-11	-1.85217e-11	-3.3946e-11	0.035	-9.72542e-11	-9.8761e-11	-1.04889e-10	-9.8852e-11	-1.15728e-10	-1.00404e-10	-1.09482e-10	-1.12669e-10	-1.20403e-10	0.141705	-3.09e-11	-2.01e-11	-6.17e-12	-4.63e-12	-1.08e-11	-3.24e-11	-1.7e-11	-1.39e-11	-1.85e-11	0.035	-2.0002e-09	-1.99083e-09	-2.00776e-09	-1.98308e-09	-1.97856e-09	-1.9924e-09	-1.98312e-09	-2.01241e-09	-2.02472e-09	0.141705	-2.31493e-11	-1.08013e-11	-2.31498e-11	-9.2642e-12	-9.26646e-12	-9.26702e-12	-7.72092e-12	-2.31515e-11	-2.77769e-11
0.14271	-4.47569e-11	-1.85217e-11	-1.85205e-11	-4.01282e-11	-4.47513e-11	-2.31526e-11	-1.85228e-11	-2.16077e-11	-1.85284e-11	0.03525	-1.00286e-10	-9.57837e-11	-1.04916e-10	-1.01857e-10	-1.11116e-10	-1.09455e-10	-1.03473e-10	-1.12623e-10	-1.2191e-10	0.14271	-2.62e-11	-1.39e-11	-1.55e-12	-9.26e-12	-9.26e-12	-3.7e-11	-3.55e-11	-2.62e-11	-2.47e-11	0.03525	-2.00161e-09	-1.98776e-09	-2.00625e-09	-1.97697e-09	-1.98151e-09	-1.99082e-09	-1.98305e-09	-2.01087e-09	-2.02017e-09	0.14271	-2.00621e-11	-6.17876e-12	-1.5434e-11	-1.54278e-11	-1.54266e-11	-2.16048e-11	-9.25914e-12	-2.77819e-11	-2.93196e-11
0.143715	-4.62974e-11	-2.31453e-11	-2.00644e-11	-4.93772e-11	-3.85838e-11	-2.77757e-11	-2.31504e-11	-2.93179e-11	-2.7774e-11	0.0355	-9.87883e-11	-1.09409e-10	-1.00323e-10	-1.04898e-10	-1.06541e-10	-9.89157e-11	-1.09537e-10	-1.06523e-10	-1.21901e-10	0.143715	-2.16e-11	-7.72e-12	-7.71e-12	-9.27e-12	-1.39e-11	-4.01e-11	-3.09e-11	-3.4e-11	-2.32e-11	0.0355	-1.99849e-09	-1.98618e-09	-2.00167e-09	-1.97544e-09	-1.97392e-09	-1.98617e-09	-1.9709e-09	-2.00471e-09	-2.01703e-09	0.143715	-1.5434e-11	-1.69705e-11	-1.08041e-11	-7.72148e-12	-4.63886e-12	-3.08595e-11	-9.2642e-12	-4.01175e-11	-2.31549e-11
0.14472	-4.47535e-11	-1.69801e-11	-2.62313e-11	-3.70422e-11	-3.70371e-11	-2.31521e-11	-3.08674e-11	-2.46987e-11	-2.31549e-11	0.03575	-1.00232e-10	-9.57928e-11	-9.72269e-11	-1.00377e-10	-1.11062e-10	-1.12496e-10	-1.09509e-10	-1.06496e-10	-1.1886e-10	0.14472	-1.39e-11	-4.63e-12	-9.26e-12	-2.47e-11	-2.01e-11	-4.01e-11	-3.09e-11	-3.7e-11	-3.7e-11	0.03575	-1.98477e-09	-1.98005e-09	-2.00157e-09	-1.97998e-09	-1.97686e-09	-1.97553e-09	-1.97992e-09	-1.99551e-09	-2.00635e-09	0.14472	-1.3889e-11	-1.23491e-11	-9.26195e-12	-1.3889e-11	-1.85149e-11	-2.31588e-11	-2.16037e-11	-3.08685e-11	-3.24056e-11
0.145725	-3.8586e-11	-2.16054e-11	-2.00689e-11	-3.39522e-11	-3.08651e-11	-2.62409e-11	-4.32063e-11	-3.70366e-11	-3.39455e-11	0.036	-8.81127e-11	-1.0025e-10	-9.41585e-11	-1.06468e-10	-1.06505e-10	-9.8852e-11	-9.8852e-11	-1.0803e-10	-1.20358e-10	0.145725	-1.39e-11	-1.69e-15	-1.39e-11	-2.78e-11	-2.62e-11	-4.63e-11	-3.09e-11	-3.09e-11	-3.4e-11	0.036	-1.98918e-09	-1.97691e-09	-1.99097e-09	-1.97544e-09	-1.96624e-09	-1.98609e-09	-1.97078e-09	-1.99384e-09	-2.00936e-09	0.145725	-1.08035e-11	-1.54323e-11	-1.38862e-11	-1.85149e-11	-2.00593e-11	-4.16591e-11	-2.7778e-11	-2.93218e-11	-3.24073e-11
0.14673	-4.3208e-11	-2.46903e-11	-3.08629e-11	-3.08679e-11	-2.31543e-11	-4.32024e-11	-4.01271e-11	-4.32069e-11	-2.62409e-11	0.03625	-1.00295e-10	-9.41949e-11	-9.41858e-11	-1.09491e-10	-1.0498e-10	-9.88247e-11	-1.01875e-10	-1.09619e-10	-1.18869e-10	0.14673	-3.09e-12	-3.94e-15	-1.85e-11	-2.78e-11	-2.47e-11	-5.09e-11	-3.86e-11	-2.62e-11	-3.86e-11	0.03625	-1.97551e-09	-1.96776e-09	-2.00311e-09	-1.97689e-09	-1.97221e-09	-1.97698e-09	-1.96313e-09	-1.97871e-09	-2.01244e-09	0.14673	-9.26252e-12	-1.69756e-11	-9.2642e-12	-1.08081e-11	-1.2348e-11	-3.39528e-11	-3.08668e-11	-2.62386e-11	-2.77825e-11
0.147735	-3.70377e-11	-2.16071e-11	-3.39511e-11	-3.39511e-11	-2.93201e-11	-3.39635e-11	-4.16681e-11	-3.55e-11	-3.24106e-11	0.0365	-1.09446e-10	-9.72269e-11	-1.01784e-10	-9.88793e-11	-1.09582e-10	-1.07948e-10	-1.07984e-10	-1.18742e-10	-1.23408e-10	0.147735	-7.71e-12	-1.08e-11	-1.39e-11	-2.01e-11	-2.62e-11	-4.01e-11	-2.93e-11	-2.32e-11	-3.55e-11	0.0365	-1.98003e-09	-1.97075e-09	-2.00312e-09	-1.96918e-09	-1.9601e-09	-1.97386e-09	-1.96761e-09	-1.99988e-09	-2.01543e-09	0.147735	-1.54283e-11	-1.69772e-11	-1.69722e-11	-1.69772e-11	-9.26364e-12	-2.77814e-11	-3.70315e-11	-3.0864e-11	-3.2405e-11
0.14874	-2.77819e-11	-2.1606e-11	-3.39534e-11	-3.39472e-11	-2.93207e-11	-5.55492e-11	-4.16715e-11	-4.01254e-11	-4.32097e-11	0.03675	-9.72633e-11	-1.00332e-10	-9.72723e-11	-1.06414e-10	-1.15628e-10	-1.03455e-10	-1.06514e-10	-1.12641e-10	-1.1886e-10	0.14874	1.54e-12	-1.7e-11	-1.54e-11	-3.24e-11	-2.62e-11	-3.55e-11	-3.09e-11	-2.31e-11	-2.62e-11	0.03675	-1.98458e-09	-1.96923e-09	-1.99245e-09	-1.95395e-09	-1.96915e-09	-1.97078e-09	-1.96002e-09	-1.98477e-09	-2.00172e-09	0.14874	-9.26589e-12	-2.00627e-11	-1.38901e-11	-2.62313e-11	-1.69761e-11	-2.77757e-11	-2.31583e-11	-3.0864e-11	-2.62364e-11
0.149745	-2.62381e-11	-2.16071e-11	-3.70399e-11	-2.00706e-11	-2.46965e-11	-5.24699e-11	-4.93789e-11	-4.47535e-11	-4.78418e-11	0.037	-9.11174e-11	-1.06423e-10	-1.00232e-10	-1.01902e-10	-1.01957e-10	-1.07939e-10	-1.09564e-10	-1.03436e-10	-1.18842e-10	0.149745	-4.63e-12	-1.7e-11	-2.78e-11	-2.93e-11	-3.4e-11	-2.47e-11	-2.16e-11	-2.47e-11	-2.62e-11	0.037	-1.97543e-09	-1.96759e-09	-1.99384e-09	-1.96455e-09	-1.96456e-09	-1.96926e-09	-1.95995e-09	-1.98769e-09	-2.00165e-09	0.149745	-2.00548e-11	-2.31509e-11	-1.2348e-11	-2.31515e-11	-2.46858e-11	-1.85262e-11	-3.39455e-11	-2.62347e-11	-2.16065e-11
0.15075	-3.08629e-11	-2.46965e-11	-4.32074e-11	-2.77757e-11	-3.08606e-11	-4.47558e-11	-4.01304e-11	-4.47558e-11	-5.24677e-11	0.03725	-9.56563e-11	-1.01829e-10	-8.95923e-11	-1.04898e-10	-1.04925e-10	-9.72906e-11	-1.11107e-10	-1.00359e-10	-1.20331e-10	0.15075	-1.54e-11	-2.01e-11	-2.32e-11	-3.4e-11	-4.01e-11	-1.54e-11	-3.09e-11	-1.08e-11	-2.62e-11	0.03725	-1.97086e-09	-1.94928e-09	-1.98171e-09	-1.96606e-09	-1.95392e-09	-1.97227e-09	-1.95693e-09	-1.98157e-09	-2.00316e-09	0.15075	-9.26702e-12	-3.08606e-11	-1.5434e-11	-2.62353e-11	-1.38941e-11	-2.77735e-11	-2.62403e-11	-1.8525e-11	-1.85205e-11
0.151755	-2.77802e-11	-3.85753e-11	-3.70416e-11	-2.62353e-11	-2.31538e-11	-3.85872e-11	-4.4753e-11	-4.62963e-11	-4.63013e-11	0.0375	-9.57018e-11	-9.26698e-11	-9.26243e-11	-1.00323e-10	-1.04934e-10	-9.72542e-11	-1.1108e-10	-1.04934e-10	-1.14194e-10	0.151755	-2.01e-11	-2.47e-11	-2.62e-11	-3.24e-11	-4.94e-11	-1.24e-11	-2.31e-11	-7.72e-12	-1.7e-11	0.0375	-1.97991e-09	-1.94918e-09	-1.99228e-09	-1.95384e-09	-1.96445e-09	-1.96772e-09	-1.96141e-09	-1.97398e-09	-2.00157e-09	0.151755	-1.85143e-11	-2.46982e-11	-2.16032e-11	-2.77785e-11	-1.54345e-11	-2.16071e-11	-3.08645e-11	-2.62257e-11	-1.85194e-11
0.15276	-2.77791e-11	-3.39522e-11	-3.85793e-11	-2.31504e-11	-2.77808e-11	-4.62968e-11	-4.32119e-11	-4.16681e-11	-4.78418e-11	0.03775	-9.87247e-11	-9.572e-11	-1.00313e-10	-9.73087e-11	-1.034e-10	-1.01802e-10	-1.05016e-10	-1.07966e-10	-1.06614e-10	0.15276	-1.7e-11	-3.24e-11	-4.01e-11	-2.47e-11	-3.7e-11	-2.01e-11	-1.39e-11	-1.7e-11	-9.26e-12	0.03775	-1.96778e-09	-1.95068e-09	-1.98616e-09	-1.94918e-09	-1.95077e-09	-1.96921e-09	-1.9492e-09	-1.9861e-09	-1.98783e-09	0.15276	-1.38912e-11	-3.39489e-11	-2.00627e-11	-2.77791e-11	-2.16071e-11	-1.852e-11	-3.24061e-11	-6.18214e-12	-1.85211e-11
0.153765	-2.77785e-11	-2.93291e-11	-3.24135e-11	-2.31509e-11	-3.70326e-11	-4.938e-11	-4.1667e-11	-3.54961e-11	-4.93806e-11	0.038	-9.41676e-11	-1.04843e-10	-1.07902e-10	-1.07912e-10	-1.01893e-10	-9.73269e-11	-1.11062e-10	-1.00386e-10	-1.20185e-10	0.153765	-2.01e-11	-3.4e-11	-3.24e-11	-2.93e-11	-4.17e-11	-2.93e-11	-9.26e-12	-1.23e-11	-1.39e-11	0.038	-1.97071e-09	-1.94761e-09	-1.97247e-09	-1.94603e-09	-1.94762e-09	-1.9677e-09	-1.94309e-09	-1.98006e-09	-1.98776e-09	0.153765	-1.38952e-11	-3.39483e-11	-1.8525e-11	-2.77791e-11	-3.08606e-11	-1.69761e-11	-2.62358e-11	-1.08024e-11	-2.31453e-11
0.15477	-2.62381e-11	-4.32046e-11	-3.8577e-11	-2.77763e-11	-2.93291e-11	-3.85832e-11	-3.54989e-11	-3.08679e-11	-3.8586e-11	0.03825	-9.41312e-11	-9.72996e-11	-9.42859e-11	-9.88338e-11	-1.06459e-10	-1.09455e-10	-1.08039e-10	-1.04952e-10	-1.02066e-10	0.15477	-3.24e-11	-4.63e-11	-3.4e-11	-2.78e-11	-3.24e-11	-1.08e-11	-1.08e-11	-7.72e-12	-9.26e-12	0.03825	-1.96313e-09	-1.94145e-09	-1.98448e-09	-1.93534e-09	-1.94461e-09	-1.96771e-09	-1.95219e-09	-1.97843e-09	-1.98928e-09	0.15477	-2.93196e-11	-2.31538e-11	-3.24022e-11	-2.77791e-11	-2.62398e-11	-1.54306e-11	-2.00661e-11	-1.38856e-11	-1.69772e-11
0.155775	-3.08584e-11	-3.70411e-11	-3.08696e-11	-2.46942e-11	-4.01214e-11	-3.08696e-11	-3.85821e-11	-3.24078e-11	-3.85798e-11	0.0385	-9.26061e-11	-1.01811e-10	-1.04816e-10	-1.00368e-10	-1.06468e-10	-1.01911e-10	-1.06477e-10	-1.11062e-10	-1.18705e-10	0.155775	-2.93e-11	-4.01e-11	-3.7e-11	-2.16e-11	-3.55e-11	-1.39e-11	-4.63e-12	-1.08e-11	-4.5e-15	0.0385	-1.96772e-09	-1.93535e-09	-1.96633e-09	-1.9353e-09	-1.95371e-09	-1.97217e-09	-1.95066e-09	-1.96786e-09	-1.98921e-09	0.155775	-3.70332e-11	-2.46903e-11	-2.77808e-11	-2.77769e-11	-3.24061e-11	-7.72205e-12	-2.31459e-11	-6.18158e-12	-1.38918e-11
0.15678	-1.54424e-11	-3.70394e-11	-3.39489e-11	-2.62364e-11	-4.01271e-11	-3.39489e-11	-4.16636e-11	-3.08651e-11	-3.24118e-11	0.03875	-9.26152e-11	-9.8761e-11	-9.42404e-11	-1.11016e-10	-1.03382e-10	-1.03382e-10	-1.034e-10	-1.0803e-10	-1.14239e-10	0.15678	-4.01e-11	-4.01e-11	-2.47e-11	-1.39e-11	-3.86e-11	-1.08e-11	-9.26e-12	-6.18e-12	-3.09e-12	0.03875	-1.97837e-09	-1.94139e-09	-1.97833e-09	-1.93833e-09	-1.94763e-09	-1.95239e-09	-1.94151e-09	-1.98604e-09	-1.97553e-09	0.15678	-2.9323e-11	-2.00632e-11	-2.77808e-11	-2.16065e-11	-3.08651e-11	-1.543e-11	-1.69789e-11	-2.15981e-11	-1.69739e-11
0.157785	-2.62324e-11	-3.85787e-11	-2.77785e-11	-2.93196e-11	-4.47547e-11	-2.77808e-11	-3.08679e-11	-2.77819e-11	-3.395e-11	0.039	-9.56472e-11	-9.41949e-11	-1.00286e-10	-1.04961e-10	-9.73178e-11	-1.01884e-10	-1.00368e-10	-1.04952e-10	-1.15737e-10	0.157785	-4.48e-11	-2.78e-11	-2.31e-11	-9.26e-12	-3.7e-11	-1.39e-11	-4.64e-12	-1.08e-11	-7.72e-12	0.039	-1.96919e-09	-1.93689e-09	-1.96317e-09	-1.9353e-09	-1.94305e-09	-1.95534e-09	-1.94136e-09	-1.97694e-09	-1.9831e-09	0.157785	-2.31521e-11	-1.69784e-11	-3.24045e-11	-1.69767e-11	-2.77797e-11	-1.543e-11	-1.85166e-11	-1.54373e-11	-1.38924e-11
0.15879	-2.77808e-11	-3.08696e-11	-2.00678e-11	-2.46976e-11	-4.78401e-11	-2.62409e-11	-2.62364e-11	-3.24022e-11	-2.93224e-11	0.03925	-9.26607e-11	-9.8761e-11	-1.01811e-10	-1.01875e-10	-1.06432e-10	-1.04907e-10	-1.06432e-10	-1.03473e-10	-1.15764e-10	0.15879	-4.17e-11	-2.93e-11	-2.16e-11	-1.54e-11	-1.85e-11	-2.01e-11	-1.85e-11	-1.39e-11	-2.01e-11	0.03925	-1.95398e-09	-1.94442e-09	-1.96611e-09	-1.93529e-09	-1.94757e-09	-1.95843e-09	-1.92617e-09	-1.9662e-09	-1.98764e-09	0.15879	-2.46965e-11	-2.00576e-11	-2.46942e-11	-1.38907e-11	-2.62347e-11	-7.72261e-12	-1.23485e-11	-2.16009e-11	-1.85205e-11
0.159795	-3.395e-11	-3.39489e-11	-2.62296e-11	-3.39511e-11	-4.62985e-11	-3.85703e-11	-2.31493e-11	-1.85262e-11	-2.4692e-11	0.0395	-1.00204e-10	-1.01848e-10	-9.57928e-11	-1.01839e-10	-1.06523e-10	-1.01884e-10	-1.03491e-10	-1.1413e-10	-1.18787e-10	0.159795	-3.55e-11	-3.09e-11	-1.54e-11	-9.26e-12	-2.62e-11	-1.7e-11	-1.7e-11	-1.54e-11	-9.27e-12	0.0395	-1.96909e-09	-1.93233e-09	-1.96307e-09	-1.93678e-09	-1.94298e-09	-1.96146e-09	-1.93673e-09	-1.9646e-09	-1.9739e-09	0.159795	-3.70326e-11	-9.26252e-12	-2.16093e-11	-1.38896e-11	-2.16071e-11	-1.69705e-11	-1.2344e-11	-1.38952e-11	-2.6233e-11
0.1608	-3.39551e-11	-2.77814e-11	-1.54402e-11	-4.01254e-11	-4.47558e-11	-1.85301e-11	-2.00632e-11	-2.31476e-11	-1.85245e-11	0.03975	-8.96014e-11	-1.03373e-10	-1.07902e-10	-9.88247e-11	-1.12605e-10	-1.03409e-10	-1.15637e-10	-1.12587e-10	-1.14248e-10	0.1608	-2.78e-11	-2.47e-11	-7.72e-12	-1.39e-11	-2.01e-11	-2.78e-11	-1.39e-11	-3.09e-11	-1.85e-11	0.03975	-1.96154e-09	-1.94279e-09	-1.96302e-09	-1.93071e-09	-1.93683e-09	-1.95541e-09	-1.93218e-09	-1.96298e-09	-1.96616e-09	0.1608	-3.24067e-11	-6.1782e-12	-2.77735e-11	-1.3885e-11	-2.00621e-11	-1.08081e-11	-6.17651e-12	-2.16048e-11	-2.62341e-11
0.161805	-4.16625e-11	-2.77774e-11	-2.46892e-11	-4.62974e-11	-4.47547e-11	-2.77774e-11	-1.85239e-11	-2.31493e-11	-2.62313e-11	0.04	-9.41039e-11	-1.00359e-10	-9.88429e-11	-1.0488e-10	-1.09628e-10	-1.06496e-10	-1.09564e-10	-9.88793e-11	-1.17262e-10	0.161805	-3.09e-11	-2.16e-11	-9.26e-12	-9.26e-12	-1.7e-11	-2.62e-11	-2.31e-11	-2.01e-11	-2.47e-11	0.04	-1.95844e-09	-1.92001e-09	-1.9569e-09	-1.9352e-09	-1.93228e-09	-1.9614e-09	-1.92608e-09	-1.94932e-09	-1.9615e-09	0.161805	-2.16099e-11	-1.69722e-11	-1.85205e-11	-1.5506e-12	-1.69789e-11	-1.85188e-11	-9.25914e-12	-2.62392e-11	-2.16122e-11
0.16281	-3.24157e-11	-2.31509e-11	-2.46937e-11	-4.93794e-11	-4.32131e-11	-3.2405e-11	-2.93173e-11	-2.31504e-11	-2.16099e-11	0.04025	-9.26334e-11	-1.04898e-10	-1.01829e-10	-1.00359e-10	-1.15683e-10	-1.11098e-10	-1.01957e-10	-1.03409e-10	-1.15783e-10	0.16281	-2.47e-11	-7.72e-12	-7.72e-12	-1.08e-11	-1.08e-11	-3.09e-11	-2.93e-11	-2.78e-11	-3.24e-11	0.04025	-1.95834e-09	-1.9244e-09	-1.95382e-09	-1.92753e-09	-1.94286e-09	-1.94919e-09	-1.93061e-09	-1.96144e-09	-1.95539e-09	0.16281	-2.1602e-11	-1.69727e-11	-1.2348e-11	-9.2552e-12	-2.15998e-11	-2.46897e-11	-1.08041e-11	-4.01186e-11	-3.39489e-11
0.163815	-4.16658e-11	-2.3147e-11	-2.77757e-11	-3.70484e-11	-4.47518e-11	-2.62403e-11	-2.62414e-11	-2.62347e-11	-2.77746e-11	0.0405	-9.72451e-11	-1.01866e-10	-1.00323e-10	-1.033e-10	-1.11071e-10	-1.12605e-10	-1.1108e-10	-1.09482e-10	-1.20276e-10	0.163815	-1.85e-11	-1.08e-11	-7.72e-12	-1.39e-11	-1.39e-11	-3.55e-11	-2.62e-11	-3.86e-11	-3.55e-11	0.0405	-1.9431e-09	-1.91685e-09	-1.95379e-09	-1.91526e-09	-1.93073e-09	-1.94e-09	-1.92914e-09	-1.9614e-09	-1.95836e-09	0.163815	-1.08109e-11	-7.72148e-12	-1.08035e-11	-4.63323e-12	-9.26533e-12	-2.31464e-11	-1.54311e-11	-3.54961e-11	-3.70377e-11
0.16482	-4.32074e-11	-1.69806e-11	-2.1606e-11	-5.09193e-11	-3.7045e-11	-3.24078e-11	-3.85759e-11	-2.62414e-11	-2.1611e-11	0.04075	-1.04834e-10	-1.00332e-10	-1.00313e-10	-8.96469e-11	-9.89157e-11	-1.04952e-10	-1.14139e-10	-1.00368e-10	-1.08148e-10	0.16482	-9.27e-12	-7.72e-12	-6.18e-12	-1.39e-11	-2.78e-11	-3.7e-11	-3.24e-11	-3.86e-11	-3.09e-11	0.04075	-1.94604e-09	-1.9244e-09	-1.95231e-09	-1.91065e-09	-1.93215e-09	-1.94602e-09	-1.93368e-09	-1.9416e-09	-1.95079e-09	0.16482	-2.15964e-11	-1.23457e-11	-1.08041e-11	-9.25801e-12	-1.2344e-11	-1.38986e-11	-1.54323e-11	-3.24078e-11	-3.70377e-11
0.165825	-3.24135e-11	-2.31487e-11	-1.54396e-11	-4.01282e-11	-4.62884e-11	-3.54955e-11	-3.3959e-11	-4.16608e-11	-2.93224e-11	0.041	-9.42404e-11	-1.01857e-10	-1.00341e-10	-9.87338e-11	-1.10989e-10	-9.88247e-11	-1.0655e-10	-1.00377e-10	-1.15692e-10	0.165825	-1.7e-11	-9.26e-12	-1.54e-11	-1.85e-11	-1.85e-11	-3.55e-11	-2.93e-11	-3.4e-11	-3.7e-11	0.041	-1.94292e-09	-1.9199e-09	-1.95989e-09	-1.91664e-09	-1.92752e-09	-1.94148e-09	-1.92904e-09	-1.946e-09	-1.95679e-09	0.165825	-6.18327e-12	-1.54328e-11	-1.38873e-11	-9.25914e-12	-9.26083e-12	-2.93162e-11	-1.38935e-11	-2.62392e-11	-3.395e-11
0.16683	-3.39494e-11	-2.7774e-11	-2.77746e-11	-3.70354e-11	-2.77859e-11	-3.85815e-11	-4.78362e-11	-3.54995e-11	-3.70332e-11	0.04125	-1.00241e-10	-1.03464e-10	-1.04907e-10	-1.01784e-10	-1.0192e-10	-1.01866e-10	-1.09537e-10	-1.11044e-10	-1.14212e-10	0.16683	-6.18e-12	-2.01e-11	-1.54e-11	-3.39e-11	-1.85e-11	-3.7e-11	-3.55e-11	-2.62e-11	-3.7e-11	0.04125	-1.92776e-09	-1.92445e-09	-1.95382e-09	-1.903e-09	-1.91694e-09	-1.94142e-09	-1.91384e-09	-1.93703e-09	-1.94762e-09	0.16683	-1.85115e-11	-1.85205e-11	-1.0803e-11	-7.72036e-12	-9.25914e-12	-2.77847e-11	-2.31464e-11	-2.93201e-11	-2.46982e-11
0.167835	-2.7783e-11	-1.85245e-11	-2.77802e-11	-2.47004e-11	-2.77802e-11	-4.01288e-11	-4.6294e-11	-4.01276e-11	-2.93275e-11	0.0415	-9.41767e-11	-1.15646e-10	-1.034e-10	-9.26789e-11	-1.03391e-10	-1.06432e-10	-1.0655e-10	-1.096e-10	-1.14194e-10	0.167835	-1.08e-11	-4.64e-12	-1.08e-11	-2.93e-11	-3.09e-11	-3.24e-11	-4.01e-11	-2.47e-11	-3.55e-11	0.0415	-1.94597e-09	-1.92445e-09	-1.95066e-09	-1.9105e-09	-1.93654e-09	-1.93682e-09	-1.92589e-09	-1.96276e-09	-1.93846e-09	0.167835	-9.26646e-12	-2.46875e-11	-7.71529e-12	-1.69727e-11	-7.72205e-12	-4.16574e-11	-2.46942e-11	-2.62369e-11	-3.08589e-11
0.16884	-3.24045e-11	-2.31459e-11	-3.08696e-11	-3.39432e-11	-3.08612e-11	-5.09222e-11	-3.24185e-11	-5.09239e-11	-3.54972e-11	0.04175	-9.41494e-11	-1.11153e-10	-1.01902e-10	-9.72087e-11	-1.03409e-10	-1.01875e-10	-1.14157e-10	-1.1266e-10	-1.12641e-10	0.16884	-1.23e-11	-9.26e-12	-1.54e-11	-3.09e-11	-3.09e-11	-3.09e-11	-2.78e-11	-2.78e-11	-2.32e-11	0.04175	-1.946e-09	-1.91983e-09	-1.93852e-09	-1.90445e-09	-1.90927e-09	-1.93222e-09	-1.91681e-09	-1.93851e-09	-1.94445e-09	0.16884	-1.85121e-11	-1.69834e-11	-1.5506e-12	-1.69756e-11	-2.16015e-11	-2.4701e-11	-3.08645e-11	-2.62358e-11	-1.85245e-11
0.169845	-2.46959e-11	-1.85267e-11	-4.47507e-11	-1.85273e-11	-2.16116e-11	-4.47586e-11	-4.47496e-11	-4.93834e-11	-4.62946e-11	0.042	-9.56745e-11	-1.12578e-10	-1.08012e-10	-9.87701e-11	-1.04952e-10	-1.00323e-10	-1.14176e-10	-1.1571e-10	-1.08084e-10	0.169845	-2.01e-11	-1.23e-11	-2.47e-11	-2.93e-11	-3.4e-11	-3.7e-11	-2.78e-11	-2.16e-11	-3.09e-11	0.042	-1.93228e-09	-1.91218e-09	-1.95211e-09	-1.9044e-09	-1.91978e-09	-1.93219e-09	-1.91679e-09	-1.93837e-09	-1.93537e-09	0.169845	-7.72148e-12	-2.93168e-11	-1.54266e-11	-1.54373e-11	-2.31493e-11	-3.08617e-11	-3.39505e-11	-2.62341e-11	-2.00644e-11
0.17085	-2.62341e-11	-3.39466e-11	-4.62968e-11	-2.46875e-11	-2.77769e-11	-4.78395e-11	-4.16709e-11	-4.3217e-11	-4.63013e-11	0.04225	-9.56927e-11	-1.00404e-10	-1.11053e-10	-1.00259e-10	-1.08021e-10	-1.00386e-10	-1.09646e-10	-1.12669e-10	-1.12687e-10	0.17085	-1.85e-11	-2.16e-11	-2.16e-11	-3.24e-11	-4.01e-11	-2.01e-11	-2.93e-11	-1.08e-11	-2.47e-11	0.04225	-1.93368e-09	-1.91369e-09	-1.94143e-09	-1.90288e-09	-1.91985e-09	-1.93221e-09	-1.92284e-09	-1.9399e-09	-1.94141e-09	0.17085	-1.0803e-11	-2.62414e-11	-1.23502e-11	-2.62319e-11	-2.46914e-11	-2.62347e-11	-3.24129e-11	-2.1606e-11	-2.62291e-11
0.171855	-2.31487e-11	-3.39545e-11	-4.32091e-11	-1.69817e-11	-2.77785e-11	-4.47535e-11	-4.47541e-11	-5.09233e-11	-5.40104e-11	0.0425	-9.72178e-11	-1.03373e-10	-1.03464e-10	-9.26789e-11	-1.09528e-10	-1.12569e-10	-1.17199e-10	-1.11116e-10	-1.21765e-10	0.171855	-2.16e-11	-2.32e-11	-2.62e-11	-3.55e-11	-2.62e-11	-2.16e-11	-1.54e-11	-9.26e-12	-2.01e-11	0.0425	-1.92605e-09	-1.91827e-09	-1.92761e-09	-1.90284e-09	-1.92137e-09	-1.93526e-09	-1.91373e-09	-1.93991e-09	-1.9414e-09	0.171855	-1.38896e-11	-3.85736e-11	-2.00593e-11	-2.62381e-11	-2.31509e-11	-1.85228e-11	-4.16602e-11	-1.69784e-11	-1.38929e-11
0.17286	-1.8525e-11	-4.01237e-11	-3.24146e-11	-2.46892e-11	-2.62369e-11	-3.70427e-11	-4.47518e-11	-4.47592e-11	-4.93845e-11	0.04275	-9.71905e-11	-1.01893e-10	-1.06468e-10	-9.87247e-11	-1.03427e-10	-1.0961e-10	-1.09619e-10	-1.09628e-10	-1.05071e-10	0.17286	-2.62e-11	-3.39e-11	-3.86e-11	-2.78e-11	-4.63e-11	-9.27e-12	-2.47e-11	-1.54e-11	-1.23e-11	0.04275	-1.92291e-09	-1.91836e-09	-1.9215e-09	-1.89824e-09	-1.91979e-09	-1.93517e-09	-1.91358e-09	-1.93986e-09	-1.93225e-09	0.17286	-1.69756e-11	-2.77842e-11	-1.85233e-11	-3.24039e-11	-2.62353e-11	-2.00599e-11	-2.77853e-11	-1.85183e-11	-1.08064e-11
0.173865	-2.9319e-11	-4.16698e-11	-3.70371e-11	-2.31476e-11	-2.77808e-11	-4.01248e-11	-3.54978e-11	-4.93834e-11	-4.32142e-11	0.043	-9.1081e-11	-1.06477e-10	-1.0645e-10	-9.72269e-11	-1.01911e-10	-1.12678e-10	-1.09591e-10	-1.17226e-10	-1.09528e-10	0.173865	-1.85e-11	-2.62e-11	-3.86e-11	-2.47e-11	-3.55e-11	-1.54e-11	-9.26e-12	-7.72e-12	-8.45e-15	0.043	-1.91682e-09	-1.92745e-09	-1.93365e-09	-1.89365e-09	-1.90911e-09	-1.91687e-09	-1.89843e-09	-1.9322e-09	-1.93378e-09	0.173865	-1.85188e-11	-3.08623e-11	-2.77769e-11	-2.46942e-11	-2.77785e-11	-1.38912e-11	-3.08629e-11	-1.69778e-11	-1.69722e-11
0.17487	-3.08623e-11	-4.62946e-11	-3.70382e-11	-1.69812e-11	-3.39494e-11	-4.16653e-11	-3.24073e-11	-4.93839e-11	-4.32108e-11	0.04325	-8.9565e-11	-1.09564e-10	-1.00341e-10	-9.56745e-11	-1.09519e-10	-1.1876e-10	-1.12678e-10	-1.14194e-10	-1.06505e-10	0.17487	-2.32e-11	-3.7e-11	-3.55e-11	-2.32e-11	-3.24e-11	-6.18e-12	-7.71e-12	-1.39e-11	-1.08e-11	0.04325	-1.92132e-09	-1.91835e-09	-1.93215e-09	-1.89509e-09	-1.90906e-09	-1.91672e-09	-1.91504e-09	-1.92602e-09	-1.94292e-09	0.17487	-1.85239e-11	-2.46954e-11	-3.08645e-11	-2.1606e-11	-2.77808e-11	-1.23502e-11	-2.62364e-11	-2.00587e-11	-1.23496e-11
0.175875	-2.31526e-11	-4.01288e-11	-3.54933e-11	-2.4692e-11	-3.24118e-11	-3.39545e-11	-2.46976e-11	-4.62963e-11	-4.01265e-11	0.0435	-9.71814e-11	-1.11007e-10	-9.87701e-11	-9.26425e-11	-1.08048e-10	-1.12651e-10	-1.18787e-10	-1.0961e-10	-1.06532e-10	0.175875	-3.39e-11	-3.86e-11	-3.7e-11	-2.62e-11	-2.32e-11	-9.26e-12	-1.55e-12	-1.23e-11	-9.26e-12	0.0435	-1.91529e-09	-1.91672e-09	-1.92449e-09	-1.88597e-09	-1.91212e-09	-1.91057e-09	-1.90292e-09	-1.91992e-09	-1.93986e-09	0.175875	-3.08595e-11	-2.6233e-11	-3.08662e-11	-1.85205e-11	-3.24033e-11	-2.15981e-11	-2.31504e-11	-1.23491e-11	-1.69727e-11
0.17688	-2.4692e-11	-4.32097e-11	-2.77808e-11	-3.08617e-11	-3.8581e-11	-3.2409e-11	-3.08612e-11	-3.70399e-11	-4.01237e-11	0.04375	-9.72269e-11	-9.43041e-11	-9.72451e-11	-9.71905e-11	-1.09564e-10	-1.04971e-10	-1.17244e-10	-1.11071e-10	-1.14094e-10	0.17688	-3.24e-11	-3.7e-11	-2.32e-11	-1.85e-11	-2.62e-11	-1.23e-11	-1.08e-11	-7.72e-12	-1.23e-11	0.04375	-1.9213e-09	-1.90907e-09	-1.91984e-09	-1.889e-09	-1.9136e-09	-1.90137e-09	-1.89979e-09	-1.92597e-09	-1.92914e-09	0.17688	-2.62398e-11	-2.00632e-11	-3.24061e-11	-1.85183e-11	-2.16133e-11	-9.26477e-12	-2.31481e-11	-1.23463e-11	-1.23474e-11
0.177885	-2.46942e-11	-4.01259e-11	-2.46931e-11	-2.62381e-11	-4.16715e-11	-3.08651e-11	-2.46937e-11	-3.08685e-11	-3.54944e-11	0.044	-9.71996e-11	-1.04889e-10	-9.87338e-11	-9.56836e-11	-1.09546e-10	-1.01911e-10	-1.08175e-10	-1.0498e-10	-1.03518e-10	0.177885	-3.7e-11	-3.86e-11	-2.78e-11	-1.39e-11	-2.31e-11	-1.85e-11	-1.08e-11	-1.23e-11	-1.23e-11	0.044	-1.91222e-09	-1.90603e-09	-1.91371e-09	-1.89506e-09	-1.90291e-09	-1.89976e-09	-1.8982e-09	-1.9244e-09	-1.92452e-09	0.177885	-3.24067e-11	-1.54306e-11	-2.62369e-11	-1.54328e-11	-3.08606e-11	-1.08035e-11	-2.00604e-11	-1.23485e-11	-1.08035e-11
0.17889	-2.93213e-11	-3.85793e-11	-2.31509e-11	-2.77825e-11	-5.24643e-11	-2.77802e-11	-2.16088e-11	-3.24073e-11	-2.77814e-11	0.04425	-9.26334e-11	-1.06477e-10	-9.4204e-11	-9.41676e-11	-1.05016e-10	-1.0803e-10	-1.23353e-10	-1.04998e-10	-1.12541e-10	0.17889	-3.55e-11	-3.4e-11	-2.16e-11	-4.64e-12	-1.54e-11	-1.85e-11	-3.09e-12	-1.85e-11	-1.08e-11	0.04425	-1.91828e-09	-1.9151e-09	-1.91359e-09	-1.88598e-09	-1.89982e-09	-1.89521e-09	-1.89057e-09	-1.91062e-09	-1.92752e-09	0.17889	-3.24084e-11	-4.63717e-12	-2.31498e-11	-1.23474e-11	-2.62353e-11	-1.3885e-11	-1.08075e-11	-1.85205e-11	-1.08081e-11
0.179895	-3.08668e-11	-2.93246e-11	-2.62324e-11	-3.85776e-11	-4.32153e-11	-2.77802e-11	-2.62302e-11	-2.93246e-11	-2.62386e-11	0.0445	-9.41494e-11	-1.06487e-10	-1.0025e-10	-9.72451e-11	-1.12641e-10	-1.14185e-10	-1.20367e-10	-1.14121e-10	-1.01993e-10	0.179895	-4.17e-11	-2.62e-11	-1.7e-11	-1.23e-11	-2.16e-11	-1.7e-11	-9.26e-12	-2.32e-11	-1.39e-11	0.0445	-1.92131e-09	-1.90443e-09	-1.89996e-09	-1.89196e-09	-1.90289e-09	-1.89971e-09	-1.89059e-09	-1.90289e-09	-1.92298e-09	0.179895	-3.08651e-11	-1.3885e-11	-2.1606e-11	-1.23463e-11	-2.00644e-11	-4.63604e-12	-1.38862e-11	-2.77757e-11	-2.46852e-11
0.1809	-3.54978e-11	-2.62386e-11	-2.00678e-11	-3.70382e-11	-4.32086e-11	-3.08617e-11	-1.54368e-11	-3.24078e-11	-3.24073e-11	0.04475	-9.72087e-11	-1.06459e-10	-9.57564e-11	-1.03309e-10	-1.17244e-10	-1.17199e-10	-1.15783e-10	-1.09564e-10	-1.14076e-10	0.1809	-4.01e-11	-1.39e-11	-1.08e-11	-1.08e-11	-1.08e-11	-2.01e-11	-1.54e-11	-3.24e-11	-2.47e-11	0.04475	-1.9107e-09	-1.8968e-09	-1.91656e-09	-1.87987e-09	-1.90897e-09	-1.89212e-09	-1.9012e-09	-1.89835e-09	-1.92594e-09	0.1809	-2.77791e-11	-1.08041e-11	-2.00638e-11	-1.23457e-11	-1.85171e-11	-1.23457e-11	-7.71867e-12	-2.77774e-11	-1.85217e-11
0.181905	-4.62912e-11	-3.08578e-11	-2.77735e-11	-3.39556e-11	-3.3959e-11	-2.31532e-11	-1.54373e-11	-3.24073e-11	-3.39489e-11	0.045	-9.7236e-11	-1.01957e-10	-1.03373e-10	-9.42586e-11	-1.1423e-10	-1.05052e-10	-1.1729e-10	-1.03455e-10	-1.05052e-10	0.181905	-2.78e-11	-1.85e-11	-4.64e-12	-4.64e-12	-9.26e-12	-1.85e-11	-2.31e-11	-2.47e-11	-1.7e-11	0.045	-1.91978e-09	-1.90739e-09	-1.89993e-09	-1.89348e-09	-1.90289e-09	-1.89366e-09	-1.89059e-09	-1.91202e-09	-1.91533e-09	0.181905	-2.46925e-11	-1.08041e-11	-2.16026e-11	-1.08035e-11	-1.08086e-11	-1.85171e-11	-7.71754e-12	-2.31515e-11	-1.85239e-11
0.18291	-3.70444e-11	-1.38974e-11	-2.00627e-11	-4.01214e-11	-4.32052e-11	-2.62347e-11	-2.77746e-11	-2.77797e-11	-2.62392e-11	0.04525	-9.87519e-11	-1.14057e-10	-1.06459e-10	-1.04798e-10	-1.15737e-10	-1.11071e-10	-1.1876e-10	-1.06496e-10	-1.14157e-10	0.18291	-2.31e-11	-7.72e-12	-1.39e-11	-1.39e-11	-7.72e-12	-2.62e-11	-1.85e-11	-3.24e-11	-2.62e-11	0.04525	-1.91828e-09	-1.89988e-09	-1.9075e-09	-1.88593e-09	-1.89979e-09	-1.90434e-09	-1.89058e-09	-1.90749e-09	-1.92434e-09	0.18291	-2.16071e-11	-1.38873e-11	-1.38918e-11	-1.08035e-11	-1.8511e-11	-1.85194e-11	-1.08058e-11	-2.46954e-11	-3.08612e-11
0.183915	-4.32108e-11	-1.852e-11	-1.23558e-11	-3.54983e-11	-3.39579e-11	-2.62381e-11	-2.77819e-11	-2.46987e-11	-2.77757e-11	0.0455	-9.72542e-11	-1.01939e-10	-1.04934e-10	-9.11993e-11	-1.15701e-10	-1.09573e-10	-1.08112e-10	-1.11107e-10	-1.1571e-10	0.183915	-1.85e-11	-7.72e-12	4.62e-12	-2.01e-11	-2.01e-11	-3.09e-11	-2.32e-11	-3.24e-11	-3.24e-11	0.0455	-1.91364e-09	-1.90895e-09	-1.91509e-09	-1.88432e-09	-1.89823e-09	-1.90283e-09	-1.89972e-09	-1.90139e-09	-1.91069e-09	0.183915	-2.16037e-11	-1.08047e-11	-1.23463e-11	-1.23474e-11	-3.09558e-12	-1.85228e-11	-2.16015e-11	-3.39494e-11	-3.08685e-11
0.18492	-4.62929e-11	-2.4688e-11	-3.08567e-11	-3.85787e-11	-4.01186e-11	-3.24112e-11	-3.54933e-11	-3.85765e-11	-2.00717e-11	0.04575	-1.00341e-10	-1.034e-10	-1.01866e-10	-1.0182e-10	-1.08121e-10	-1.08039e-10	-1.11107e-10	-1.14103e-10	-1.11071e-10	0.18492	-7.72e-12	-1.08e-11	-9.26e-12	-6.18e-12	-9.27e-12	-4.01e-11	-3.09e-11	-3.09e-11	-3.24e-11	0.04575	-1.90291e-09	-1.90282e-09	-1.90143e-09	-1.87819e-09	-1.89514e-09	-1.8952e-09	-1.89827e-09	-1.90588e-09	-1.91512e-09	0.18492	-1.54345e-11	-1.23451e-11	-1.08035e-11	-1.69716e-11	-1.23451e-11	-2.77785e-11	-2.00621e-11	-3.54944e-11	-3.85753e-11
0.185925	-3.3959e-11	-1.85239e-11	-2.46948e-11	-3.24146e-11	-2.77847e-11	-4.4749e-11	-3.70366e-11	-3.70377e-11	-3.70304e-11	0.046	-1.0793e-10	-1.04889e-10	-1.00377e-10	-1.06396e-10	-1.15692e-10	-1.08021e-10	-1.12641e-10	-1.00414e-10	-9.88975e-11	0.185925	-1.08e-11	-1.39e-11	-1.08e-11	-1.85e-11	-2.47e-11	-3.7e-11	-3.7e-11	-3.09e-11	-3.09e-11	0.046	-1.89981e-09	-1.88911e-09	-1.90438e-09	-1.87512e-09	-1.89052e-09	-1.89512e-09	-1.90123e-09	-1.8983e-09	-1.90457e-09	0.185925	-1.38901e-11	-1.08064e-11	-1.08002e-11	-9.26533e-12	-1.85166e-11	-3.54899e-11	-1.69806e-11	-3.39511e-11	-2.77825e-11
0.18693	-4.01181e-11	-2.46863e-11	-2.46959e-11	-4.1658e-11	-3.08634e-11	-4.01265e-11	-3.24157e-11	-3.24151e-11	-3.08707e-11	0.04625	-9.88247e-11	-9.73542e-11	-1.09509e-10	-9.57746e-11	-1.14212e-10	-1.06541e-10	-1.11153e-10	-1.03418e-10	-1.08003e-10	0.18693	-1.08e-11	-3.09e-12	-1.08e-11	-2.78e-11	-2.16e-11	-3.09e-11	-3.86e-11	-2.62e-11	-3.86e-11	0.04625	-1.90131e-09	-1.89659e-09	-1.90288e-09	-1.87661e-09	-1.88593e-09	-1.89052e-09	-1.88905e-09	-1.90126e-09	-1.91972e-09	0.18693	-1.38896e-11	-1.85171e-11	-3.09107e-12	-1.69772e-11	-1.69778e-11	-2.77819e-11	-2.62324e-11	-2.93263e-11	-2.62403e-11
0.187935	-2.62431e-11	-1.38952e-11	-3.39505e-11	-2.16155e-11	-2.77842e-11	-3.85827e-11	-4.62912e-11	-4.47507e-11	-3.85798e-11	0.0465	-9.8761e-11	-1.11007e-10	-1.08066e-10	-1.00204e-10	-1.14212e-10	-1.14167e-10	-1.1571e-10	-1.09509e-10	-1.12578e-10	0.187935	-1.39e-11	-9.26e-12	-1.7e-11	-2.47e-11	-2.62e-11	-3.39e-11	-3.4e-11	-1.85e-11	-3.55e-11	0.0465	-1.89982e-09	-1.88596e-09	-1.90281e-09	-1.87503e-09	-1.88745e-09	-1.88595e-09	-1.88896e-09	-1.89364e-09	-1.91366e-09	0.187935	-1.38901e-11	-2.00644e-11	-7.71304e-12	-2.77729e-11	-2.00616e-11	-2.77763e-11	-2.62364e-11	-3.54899e-11	-3.70304e-11
0.18894	-3.24016e-11	-1.85222e-11	-3.85787e-11	-2.77757e-11	-3.85725e-11	-3.85866e-11	-4.01265e-11	-4.47614e-11	-4.01259e-11	0.04675	-9.72451e-11	-1.06523e-10	-1.12587e-10	-8.65786e-11	-1.15719e-10	-1.15719e-10	-1.14157e-10	-1.05007e-10	-1.03464e-10	0.18894	-1.85e-11	-7.72e-12	-2.47e-11	-3.39e-11	-2.32e-11	-2.47e-11	-2.78e-11	-2.01e-11	-3.55e-11	0.04675	-1.90436e-09	-1.88592e-09	-1.89372e-09	-1.8628e-09	-1.89192e-09	-1.89048e-09	-1.88586e-09	-1.89057e-09	-1.90606e-09	0.18894	-1.54306e-11	-2.6233e-11	-3.09051e-12	-2.16099e-11	-2.00621e-11	-2.00678e-11	-2.77808e-11	-2.62364e-11	-2.46982e-11
0.189945	-1.85262e-11	-3.08612e-11	-3.3959e-11	-2.46948e-11	-2.31554e-11	-5.09222e-11	-3.70399e-11	-6.1724e-11	-4.32125e-11	0.047	-9.87883e-11	-1.08012e-10	-1.04961e-10	-9.86974e-11	-1.12723e-10	-1.12678e-10	-1.05052e-10	-1.11016e-10	-1.04998e-10	0.189945	-6.18e-12	-1.7e-11	-3.09e-11	-3.55e-11	-4.01e-11	-1.85e-11	-2.78e-11	-1.7e-11	-2.62e-11	0.047	-1.89975e-09	-1.89043e-09	-1.90279e-09	-1.85969e-09	-1.87217e-09	-1.88749e-09	-1.87671e-09	-1.89512e-09	-1.91666e-09	0.189945	-1.08052e-11	-2.46937e-11	-9.26139e-12	-2.62336e-11	-1.85262e-11	-2.62324e-11	-3.39455e-11	-1.85267e-11	-2.77774e-11
0.19095	-2.31481e-11	-3.08696e-11	-4.78345e-11	-2.77735e-11	-2.46931e-11	-4.63002e-11	-3.70394e-11	-5.86403e-11	-4.78407e-11	0.04725	-1.03364e-10	-1.0645e-10	-1.0035e-10	-9.87701e-11	-1.20303e-10	-1.12669e-10	-1.14121e-10	-1.0045e-10	-1.15619e-10	0.19095	-1.23e-11	-2.01e-11	-2.62e-11	-4.01e-11	-4.17e-11	-2.01e-11	-2.31e-11	-2.01e-11	-2.16e-11	0.04725	-1.88903e-09	-1.87978e-09	-1.89821e-09	-1.86275e-09	-1.87968e-09	-1.89352e-09	-1.88122e-09	-1.89515e-09	-1.91062e-09	0.19095	-1.23463e-11	-2.62375e-11	-2.00565e-11	-2.46959e-11	-3.54854e-11	-2.31498e-11	-2.16161e-11	-3.08561e-11	-2.62358e-11
0.191955	-2.46914e-11	-4.16653e-11	-4.1672e-11	-1.54385e-11	-2.77757e-11	-4.62968e-11	-3.85798e-11	-4.32209e-11	-4.93823e-11	0.0475	-1.01857e-10	-9.8852e-11	-1.01857e-10	-9.87428e-11	-1.15783e-10	-1.14239e-10	-1.09582e-10	-1.1256e-10	-1.05043e-10	0.191955	-2.47e-11	-2.93e-11	-3.39e-11	-3.24e-11	-3.86e-11	-1.7e-11	-1.54e-11	-2.01e-11	-9.27e-12	0.0475	-1.8874e-09	-1.87972e-09	-1.889e-09	-1.86727e-09	-1.88126e-09	-1.88448e-09	-1.87822e-09	-1.8951e-09	-1.91054e-09	0.191955	-1.38884e-11	-3.24061e-11	-1.38957e-11	-3.24061e-11	-2.46987e-11	-2.16077e-11	-3.7032e-11	-1.69789e-11	-2.46897e-11
0.19296	-2.31498e-11	-4.32119e-11	-4.47513e-11	-1.852e-11	-2.16139e-11	-4.16709e-11	-3.39551e-11	-5.24626e-11	-4.32136e-11	0.04775	-1.00332e-10	-1.04934e-10	-1.03336e-10	-9.41949e-11	-1.17299e-10	-1.21792e-10	-1.06532e-10	-1.08048e-10	-1.11071e-10	0.19296	-1.85e-11	-2.62e-11	-3.39e-11	-2.62e-11	-3.7e-11	-1.7e-11	-1.54e-11	-1.23e-11	-1.54e-11	0.04775	-1.87976e-09	-1.87971e-09	-1.88287e-09	-1.85516e-09	-1.88276e-09	-1.89659e-09	-1.88278e-09	-1.88589e-09	-1.90289e-09	0.19296	-1.23502e-11	-3.08629e-11	-2.46914e-11	-3.24056e-11	-3.08657e-11	-2.46886e-11	-3.39539e-11	-1.08081e-11	-1.54396e-11
0.193965	-2.3147e-11	-4.47552e-11	-3.70411e-11	-2.31481e-11	-3.7032e-11	-4.32108e-11	-3.70326e-11	-3.70467e-11	-4.16692e-11	0.048	-1.01839e-10	-1.09519e-10	-9.42495e-11	-9.87247e-11	-1.20367e-10	-1.0813e-10	-1.11089e-10	-1.06441e-10	-1.09555e-10	0.193965	-2.16e-11	-3.4e-11	-2.62e-11	-2.93e-11	-2.78e-11	-1.39e-11	-1.85e-11	-1.08e-11	-1.39e-11	0.048	-1.87974e-09	-1.87814e-09	-1.88733e-09	-1.86573e-09	-1.87662e-09	-1.89046e-09	-1.88268e-09	-1.87672e-09	-1.89823e-09	0.193965	-2.16032e-11	-2.16116e-11	-3.2405e-11	-2.3156e-11	-3.70377e-11	-1.69789e-11	-3.54899e-11	-1.85155e-11	-2.46835e-11
0.19497	-1.69806e-11	-4.62968e-11	-3.54944e-11	-2.46908e-11	-3.39545e-11	-4.16658e-11	-2.31554e-11	-4.32091e-11	-4.16687e-11	0.04825	-1.0035e-10	-1.04925e-10	-1.03336e-10	-9.57382e-11	-1.21865e-10	-1.11116e-10	-1.11071e-10	-9.73633e-11	-1.0498e-10	0.19497	-2.47e-11	-4.01e-11	-3.7e-11	-2.01e-11	-3.24e-11	-1.08e-11	-1.39e-11	-1.39e-11	-9.26e-12	0.04825	-1.88273e-09	-1.8706e-09	-1.87366e-09	-1.85969e-09	-1.86893e-09	-1.87364e-09	-1.86135e-09	-1.88274e-09	-1.89216e-09	0.19497	-2.31487e-11	-2.7774e-11	-2.93224e-11	-3.24028e-11	-4.01226e-11	-1.69739e-11	-2.1611e-11	-1.54379e-11	-9.26646e-12
0.195975	-2.31504e-11	-4.32114e-11	-3.08634e-11	-2.16043e-11	-3.70382e-11	-3.24129e-11	-2.62336e-11	-4.16675e-11	-4.1667e-11	0.0485	-1.04925e-10	-9.73542e-11	-1.01811e-10	-1.0182e-10	-1.14285e-10	-1.14167e-10	-1.03418e-10	-1.1098e-10	-1.06468e-10	0.195975	-3.86e-11	-3.4e-11	-2.47e-11	-2.62e-11	-2.62e-11	-1.08e-11	-9.26e-12	-7.72e-12	-1.7e-11	0.0485	-1.87365e-09	-1.88576e-09	-1.87818e-09	-1.85963e-09	-1.86436e-09	-1.87198e-09	-1.86582e-09	-1.87823e-09	-1.9012e-09	0.195975	-2.31532e-11	-2.00627e-11	-2.62369e-11	-2.46948e-11	-3.54944e-11	-1.08035e-11	-2.1606e-11	-2.62285e-11	-1.23491e-11
0.19698	-3.24056e-11	-3.85843e-11	-2.00661e-11	-1.38997e-11	-3.85832e-11	-3.39517e-11	-2.31526e-11	-3.70394e-11	-3.70377e-11	0.04875	-1.06477e-10	-1.1098e-10	-9.26971e-11	-1.01857e-10	-1.20303e-10	-1.11144e-10	-9.88429e-11	-1.01929e-10	-1.04961e-10	0.19698	-4.01e-11	-3.24e-11	-3.24e-11	-9.27e-12	-2.01e-11	-1.39e-11	-1.08e-11	-2.01e-11	-7.72e-12	0.04875	-1.88116e-09	-1.87823e-09	-1.88269e-09	-1.85503e-09	-1.87192e-09	-1.86592e-09	-1.86887e-09	-1.88272e-09	-1.88901e-09	0.19698	-3.3946e-11	-1.23502e-11	-2.62386e-11	-2.31493e-11	-2.77785e-11	-6.17651e-12	-2.16054e-11	-1.69801e-11	-2.31464e-11
0.197985	-3.24067e-11	-4.01231e-11	-1.85211e-11	-3.3946e-11	-4.3208e-11	-3.39489e-11	-2.93156e-11	-3.39545e-11	-2.9328e-11	0.049	-1.06459e-10	-1.01902e-10	-1.0025e-10	-1.01875e-10	-1.14239e-10	-1.12641e-10	-1.06477e-10	-1.04943e-10	-1.0645e-10	0.197985	-4.01e-11	-3.86e-11	-2.93e-11	-1.7e-11	-1.24e-11	-9.27e-12	-1.23e-11	-1.54e-11	-1.7e-11	0.049	-1.87207e-09	-1.87973e-09	-1.8675e-09	-1.85037e-09	-1.86583e-09	-1.87499e-09	-1.86429e-09	-1.87356e-09	-1.88133e-09	0.197985	-2.7783e-11	-1.54323e-11	-3.39466e-11	-2.16065e-11	-1.85211e-11	-1.08024e-11	-2.00638e-11	-1.85211e-11	-2.62313e-11
0.19899	-2.62398e-11	-3.54961e-11	-2.16037e-11	-3.7036e-11	-3.70461e-11	-2.46982e-11	-1.69857e-11	-3.70354e-11	-3.70298e-11	0.04925	-1.01884e-10	-1.00286e-10	-9.72542e-11	-1.0488e-10	-1.14185e-10	-1.11116e-10	-1.12569e-10	-1.07993e-10	-1.01957e-10	0.19899	-4.47e-11	-3.09e-11	-2.01e-11	-9.26e-12	-2.01e-11	-2.16e-11	-1.7e-11	-2.47e-11	-2.01e-11	0.04925	-1.87354e-09	-1.88274e-09	-1.8735e-09	-1.84122e-09	-1.85971e-09	-1.86739e-09	-1.8597e-09	-1.86738e-09	-1.88433e-09	0.19899	-3.24067e-11	-1.69727e-11	-2.62386e-11	-2.16015e-11	-1.38918e-11	-1.38907e-11	-2.16037e-11	-2.46931e-11	-1.69789e-11
0.199995	-3.08668e-11	-3.24106e-11	-1.8525e-11	-3.2414e-11	-5.09233e-11	-3.08634e-11	-3.08544e-11	-3.08662e-11	-2.00717e-11	0.0495	-1.01866e-10	-9.41767e-11	-9.8761e-11	-9.73087e-11	-1.11189e-10	-1.09591e-10	-1.03482e-10	-1.04934e-10	-1.1413e-10	0.199995	-3.4e-11	-3.09e-11	-1.7e-11	-1.23e-11	-2.16e-11	-1.24e-11	-1.08e-11	-2.47e-11	-1.85e-11	0.0495	-1.87351e-09	-1.87514e-09	-1.87194e-09	-1.84574e-09	-1.86267e-09	-1.86271e-09	-1.86264e-09	-1.86277e-09	-1.88429e-09	0.199995	-3.08657e-11	-9.26195e-12	-2.62347e-11	-9.26589e-12	-1.54334e-11	-2.00576e-11	-1.69739e-11	-3.24033e-11	-1.54368e-11
0.201	-3.85827e-11	-3.3937e-11	-3.08392e-11	-4.16343e-11	-5.08827e-11	-3.08122e-11	-1.38344e-11	-2.61592e-11	-2.76885e-11	0.04975	-1.03382e-10	-9.41585e-11	-9.8761e-11	-1.03364e-10	-1.20276e-10	-1.11098e-10	-1.07966e-10	-1.00395e-10	-1.14148e-10	0.201	-3.09e-11	-1.7e-11	-1.85e-11	-9.23e-12	-1.54e-11	-3.39e-11	-2.15e-11	-2.93e-11	-2.92e-11	0.04975	-1.86743e-09	-1.87659e-09	-1.85975e-09	-1.84574e-09	-1.85353e-09	-1.85199e-09	-1.84894e-09	-1.8628e-09	-1.87518e-09	0.201	-2.9319e-11	-7.70854e-12	-2.31262e-11	-1.38541e-11	-1.84766e-11	-1.23007e-11	-6.11683e-12	-2.46205e-11	-2.46047e-11
0.202005	-4.78356e-11	6.15399e-12	2.92993e-11	4.31725e-11	7.40241e-11	1.1568e-10	1.54249e-10	1.88183e-10	2.12861e-10	0.05	-1.01939e-10	-9.71905e-11	-9.7236e-11	-1.03445e-10	-1.12742e-10	-1.096e-10	-1.01866e-10	-1.095e-10	-1.05052e-10	0.202005	-2.78e-11	9.25e-12	3.86e-11	7.1e-11	1e-10	1.02e-10	1.45e-10	1.6e-10	2.01e-10	0.05	-1.87046e-09	-1.87047e-09	-1.86273e-09	-1.84116e-09	-1.85193e-09	-1.85037e-09	-1.85036e-09	-1.87192e-09	-1.88122e-09	0.202005	-1.85228e-11	1.54221e-11	4.31849e-11	7.86652e-11	9.56318e-11	1.20315e-10	1.58884e-10	1.80468e-10	2.06695e-10
0.20301	-4.01304e-11	-6.16694e-12	2.62341e-11	2.00683e-11	5.24745e-11	8.02581e-11	1.04958e-10	1.34279e-10	1.46633e-10	0.05025	-1.14094e-10	-9.41585e-11	-9.7236e-11	-1.11025e-10	-1.18833e-10	-1.12569e-10	-9.72723e-11	-1.06477e-10	-1.14167e-10	0.20301	-3.09e-11	7.71e-12	3.4e-11	4.63e-11	8.33e-11	8.33e-11	1.06e-10	1.2e-10	1.54e-10	0.05025	-1.87348e-09	-1.86588e-09	-1.86269e-09	-1.84117e-09	-1.84894e-09	-1.84431e-09	-1.84576e-09	-1.86736e-09	-1.87965e-09	0.20301	-1.69761e-11	9.26195e-12	3.5495e-11	5.55638e-11	6.7914e-11	8.64312e-11	1.21928e-10	1.23478e-10	1.49714e-10
0.204015	-4.62951e-11	-1.54385e-12	1.852e-11	1.23502e-11	3.85872e-11	6.48218e-11	9.56825e-11	1.17291e-10	1.38896e-10	0.0505	-1.08048e-10	-9.41767e-11	-9.87155e-11	-1.03473e-10	-1.24869e-10	-1.00423e-10	-1.00341e-10	-1.01884e-10	-1.17271e-10	0.204015	-2.01e-11	-1.54e-12	3.09e-11	4.78e-11	6.79e-11	7.25e-11	8.95e-11	1.06e-10	1.28e-10	0.0505	-1.86588e-09	-1.86887e-09	-1.85353e-09	-1.84732e-09	-1.8611e-09	-1.85183e-09	-1.83961e-09	-1.86121e-09	-1.86596e-09	0.204015	-1.54328e-11	9.25801e-12	2.62386e-11	4.78435e-11	6.63595e-11	7.25377e-11	1.08031e-10	1.08034e-10	1.34268e-10
0.20502	-4.32142e-11	1.54216e-12	1.23502e-11	1.54311e-11	3.85832e-11	6.01897e-11	8.3339e-11	1.03404e-10	1.32721e-10	0.05075	-1.04961e-10	-1.00313e-10	-9.11629e-11	-1.07993e-10	-1.0823e-10	-1.06423e-10	-1.07984e-10	-1.01848e-10	-1.17262e-10	0.20502	-9.26e-12	9.26e-12	2.93e-11	4.63e-11	6.33e-11	7.25e-11	8.64e-11	9.72e-11	1.3e-10	0.05075	-1.86735e-09	-1.86437e-09	-1.85195e-09	-1.85493e-09	-1.85659e-09	-1.84116e-09	-1.8366e-09	-1.85662e-09	-1.87356e-09	0.20502	-1.3889e-11	4.63154e-12	2.46931e-11	4.47575e-11	6.01892e-11	6.79017e-11	9.72269e-11	1.04942e-10	1.2655e-10
0.206025	-4.62974e-11	1.54159e-12	1.69705e-11	1.38918e-11	4.16726e-11	6.01858e-11	7.56265e-11	1.00313e-10	1.21921e-10	0.051	-1.04952e-10	-1.06396e-10	-1.01775e-10	-1.06468e-10	-1.24842e-10	-1.01911e-10	-1.08048e-10	-1.00313e-10	-1.12678e-10	0.206025	-1.23e-11	9.26e-12	3.24e-11	3.4e-11	5.25e-11	6.33e-11	7.41e-11	1.03e-10	1.23e-10	0.051	-1.86578e-09	-1.87342e-09	-1.85195e-09	-1.84581e-09	-1.85497e-09	-1.83505e-09	-1.84875e-09	-1.86113e-09	-1.88427e-09	0.206025	-1.08024e-11	4.6276e-12	2.46925e-11	4.78333e-11	5.71009e-11	5.55644e-11	8.64244e-11	9.87713e-11	1.21918e-10
0.20703	-4.62946e-11	-3.08375e-12	6.17764e-12	1.85205e-11	5.55498e-11	5.40149e-11	8.33311e-11	9.56858e-11	1.14206e-10	0.05125	-1.06441e-10	-9.73087e-11	-9.88065e-11	-1.01957e-10	-1.14212e-10	-1.06432e-10	-1.11062e-10	-9.87519e-11	-1.11089e-10	0.20703	-1.39e-11	6.18e-12	2.62e-11	3.09e-11	5.25e-11	5.09e-11	7.56e-11	9.41e-11	1.1e-10	0.05125	-1.85676e-09	-1.86125e-09	-1.85346e-09	-1.84423e-09	-1.84434e-09	-1.84267e-09	-1.8442e-09	-1.85351e-09	-1.88131e-09	0.20703	-6.17651e-12	-1.54441e-12	2.46908e-11	2.7787e-11	5.24739e-11	6.01836e-11	7.71647e-11	9.56858e-11	1.12669e-10
0.208035	-3.54961e-11	0	7.71079e-12	2.6233e-11	4.63019e-11	4.78435e-11	7.40754e-11	9.72229e-11	1.14204e-10	0.0515	-1.0035e-10	-1.0182e-10	-1.01848e-10	-1.14057e-10	-1.05062e-10	-1.01911e-10	-1.0498e-10	-9.42768e-11	-1.05025e-10	0.208035	-9.26e-12	1.08e-11	1.7e-11	2.62e-11	4.32e-11	5.86e-11	7.25e-11	1.06e-10	1.16e-10	0.0515	-1.87946e-09	-1.85804e-09	-1.85039e-09	-1.84417e-09	-1.85336e-09	-1.84879e-09	-1.83504e-09	-1.85042e-09	-1.88579e-09	0.208035	-1.08024e-11	-1.07951e-11	2.00632e-11	2.93218e-11	5.40138e-11	5.2475e-11	6.94511e-11	9.8769e-11	1.29626e-10
0.20904	-2.62398e-11	3.08094e-12	-6.16525e-12	2.62347e-11	4.62996e-11	4.62996e-11	5.86543e-11	8.79677e-11	1.15743e-10	0.05175	-1.00304e-10	-1.00313e-10	-1.03309e-10	-1.01957e-10	-1.15673e-10	-1.06423e-10	-1.04961e-10	-1.1246e-10	-1.12623e-10	0.20904	-1.39e-11	7.71e-12	1.08e-11	1.7e-11	4.63e-11	6.17e-11	7.25e-11	1.08e-10	1.14e-10	0.05175	-1.85976e-09	-1.8428e-09	-1.84585e-09	-1.83502e-09	-1.84126e-09	-1.84415e-09	-1.83802e-09	-1.85039e-09	-1.87369e-09	0.20904	-1.3889e-11	1.5354e-12	1.69789e-11	2.93241e-11	5.24677e-11	5.40149e-11	7.09888e-11	9.87701e-11	1.18836e-10
0.210045	-2.77746e-11	-9.25689e-12	1.53653e-12	2.31504e-11	4.93811e-11	4.78424e-11	6.94404e-11	8.02564e-11	1.09574e-10	0.052	-9.87792e-11	-9.88429e-11	-8.96651e-11	-1.06523e-10	-1.14212e-10	-1.00377e-10	-1.08039e-10	-9.7336e-11	-1.14203e-10	0.210045	-1.23e-11	-3.08e-12	1.08e-11	1.85e-11	4.32e-11	6.17e-11	8.18e-11	1.03e-10	1.28e-10	0.052	-1.85661e-09	-1.84721e-09	-1.85493e-09	-1.83501e-09	-1.84884e-09	-1.82734e-09	-1.83656e-09	-1.84892e-09	-1.88571e-09	0.210045	-1.543e-11	-7.71473e-12	2.16015e-11	3.39438e-11	4.0131e-11	5.5556e-11	6.63629e-11	9.87735e-11	1.17293e-10
0.21105	-1.69829e-11	-1.38884e-11	-9.25463e-12	2.31509e-11	4.16732e-11	5.09261e-11	6.01914e-11	8.79604e-11	1.04946e-10	0.05225	-9.87883e-11	-1.09464e-10	-1.01748e-10	-1.17153e-10	-1.14157e-10	-1.04934e-10	-1.12623e-10	-1.00304e-10	-1.15792e-10	0.21105	-1.08e-11	-1.54e-12	1.08e-11	1.54e-11	3.55e-11	7.25e-11	8.18e-11	1.11e-10	1.17e-10	0.05225	-1.85967e-09	-1.83511e-09	-1.84736e-09	-1.84264e-09	-1.85488e-09	-1.8257e-09	-1.84417e-09	-1.85797e-09	-1.86752e-09	0.21105	-9.2642e-12	-1.23457e-11	1.38929e-11	1.54402e-11	4.32097e-11	5.09306e-11	6.63634e-11	1.08026e-10	1.25003e-10
0.212055	-2.46875e-11	-1.54362e-11	-6.17257e-12	2.77802e-11	4.62929e-11	4.78452e-11	6.01892e-11	7.71692e-11	1.08025e-10	0.0525	-1.01793e-10	-1.01857e-10	-9.57109e-11	-1.05025e-10	-1.0655e-10	-1.08003e-10	-1.11126e-10	-1.01884e-10	-1.24915e-10	0.212055	-1.24e-11	-1.55e-12	3.09e-12	2.62e-11	3.4e-11	7.56e-11	8.33e-11	1.13e-10	1.19e-10	0.0525	-1.8642e-09	-1.84724e-09	-1.84881e-09	-1.84417e-09	-1.83666e-09	-1.82267e-09	-1.84266e-09	-1.84285e-09	-1.87355e-09	0.212055	-1.5434e-11	-1.54317e-11	1.54323e-11	1.69772e-11	4.01271e-11	5.24739e-11	7.25287e-11	1.06486e-10	1.25005e-10
0.21306	-1.85233e-11	-2.62302e-11	-1.54835e-12	3.54882e-11	3.55006e-11	5.40093e-11	6.32752e-11	8.02496e-11	9.72359e-11	0.05275	-9.41767e-11	-9.41858e-11	-9.41494e-11	-1.06468e-10	-1.0961e-10	-1.06423e-10	-1.11107e-10	-1.07975e-10	-1.18887e-10	0.21306	-2.62e-11	-1.39e-11	1.54e-12	2.01e-11	3.09e-11	7.25e-11	8.18e-11	1.06e-10	1.3e-10	0.05275	-1.85507e-09	-1.8472e-09	-1.84274e-09	-1.8365e-09	-1.8441e-09	-1.82873e-09	-1.8381e-09	-1.85642e-09	-1.87962e-09	0.21306	-2.46892e-11	-1.54317e-11	1.54289e-11	2.16048e-11	4.16664e-11	6.01881e-11	6.32791e-11	1.03401e-10	1.23463e-10
0.214065	-2.31459e-11	-2.16093e-11	-1.07945e-11	2.3156e-11	3.8581e-11	4.47603e-11	6.79045e-11	8.02547e-11	1.11111e-10	0.053	-9.26334e-11	-9.41312e-11	-9.41494e-11	-1.04925e-10	-1.18715e-10	-9.42404e-11	-1.09555e-10	-1.04998e-10	-1.2191e-10	0.214065	-2.62e-11	-1.7e-11	1.69e-15	1.85e-11	3.55e-11	7.25e-11	9.57e-11	1.13e-10	1.39e-10	0.053	-1.85347e-09	-1.82899e-09	-1.84569e-09	-1.82739e-09	-1.83046e-09	-1.82422e-09	-1.84112e-09	-1.84588e-09	-1.86907e-09	0.214065	-2.46908e-11	-1.23435e-11	4.63886e-12	2.3147e-11	3.70388e-11	6.78994e-11	6.63612e-11	1.01861e-10	1.21921e-10
0.21507	-1.85222e-11	-2.6233e-11	3.07981e-12	2.93179e-11	3.85815e-11	4.93856e-11	7.25343e-11	9.10509e-11	1.11116e-10	0.05325	-9.71814e-11	-9.25879e-11	-9.56745e-11	-1.00377e-10	-1.08112e-10	-9.87701e-11	-1.04989e-10	-1.11025e-10	-1.23435e-10	0.21507	-3.09e-11	-2.16e-11	3.09e-12	2.93e-11	4.17e-11	7.1e-11	9.72e-11	1.16e-10	1.33e-10	0.05325	-1.85042e-09	-1.84408e-09	-1.83506e-09	-1.84255e-09	-1.83796e-09	-1.82875e-09	-1.84111e-09	-1.85344e-09	-1.88419e-09	0.21507	-2.00694e-11	-1.54779e-12	1.85093e-11	1.85233e-11	3.24095e-11	6.1737e-11	6.94483e-11	1.11111e-10	1.23463e-10
0.216075	-2.16043e-11	-2.31498e-11	-1.54047e-12	2.31526e-11	3.70382e-11	5.55576e-11	7.71608e-11	9.41392e-11	1.11121e-10	0.0535	-9.4204e-11	-8.9565e-11	-9.56927e-11	-1.06441e-10	-1.11062e-10	-1.03355e-10	-1.0793e-10	-1.01929e-10	-1.20312e-10	0.216075	-3.4e-11	-1.7e-11	6.17e-12	3.86e-11	4.63e-11	7.87e-11	9.72e-11	1.16e-10	1.31e-10	0.0535	-1.85033e-09	-1.83504e-09	-1.83963e-09	-1.83653e-09	-1.8304e-09	-1.82576e-09	-1.83649e-09	-1.85346e-09	-1.87205e-09	0.216075	-3.39427e-11	-3.08488e-12	4.63717e-12	2.46914e-11	2.93291e-11	7.09865e-11	7.40815e-11	1.06488e-10	1.26546e-10
0.21708	-2.00666e-11	-2.16048e-11	1.54441e-12	2.62324e-11	3.39522e-11	6.01847e-11	7.25354e-11	9.41437e-11	1.23458e-10	0.05375	-1.01775e-10	-9.56108e-11	-9.71723e-11	-1.05007e-10	-1.04989e-10	-1.00304e-10	-9.4295e-11	-1.04934e-10	-1.06605e-10	0.21708	-4.01e-11	-1.85e-11	6.17e-12	3.55e-11	5.09e-11	7.41e-11	9.26e-11	1.1e-10	1.34e-10	0.05375	-1.83968e-09	-1.83802e-09	-1.85035e-09	-1.835e-09	-1.83341e-09	-1.83183e-09	-1.82891e-09	-1.84884e-09	-1.86738e-09	0.21708	-2.16155e-11	1.12606e-15	1.0799e-11	2.77774e-11	4.47479e-11	6.79067e-11	8.94986e-11	1.06486e-10	1.21923e-10
0.218085	-2.93224e-11	-1.69761e-11	7.71867e-12	2.00655e-11	3.08645e-11	5.55582e-11	7.0995e-11	1.03395e-10	1.21923e-10	0.054	-9.57928e-11	-8.96014e-11	-8.95559e-11	-1.14094e-10	-1.06487e-10	-9.57473e-11	-1.06341e-10	-1.06505e-10	-1.12614e-10	0.218085	-3.86e-11	-1.54e-11	9.26e-12	4.32e-11	5.56e-11	7.25e-11	9.57e-11	1.08e-10	1.27e-10	0.054	-1.84267e-09	-1.83655e-09	-1.85336e-09	-1.83958e-09	-1.83493e-09	-1.83026e-09	-1.84106e-09	-1.84119e-09	-1.86427e-09	0.218085	-3.54899e-11	6.16863e-12	6.17313e-12	2.62364e-11	4.01288e-11	7.09871e-11	7.25439e-11	1.04942e-10	1.28089e-10
0.21909	-3.85781e-11	-1.2348e-11	2.00542e-11	2.16048e-11	2.46937e-11	5.09323e-11	8.02496e-11	1.00315e-10	1.29631e-10	0.05425	-1.07912e-10	-9.86519e-11	-8.94922e-11	-1.05052e-10	-1.08048e-10	-1.01802e-10	-9.42586e-11	-1.11062e-10	-1.11153e-10	0.21909	-3.4e-11	-1.39e-11	1.85e-11	3.7e-11	5.25e-11	7.25e-11	8.64e-11	1.05e-10	1.23e-10	0.05425	-1.84425e-09	-1.84263e-09	-1.8351e-09	-1.84264e-09	-1.83038e-09	-1.81652e-09	-1.83956e-09	-1.84265e-09	-1.85815e-09	0.21909	-3.39517e-11	4.50423e-15	1.54891e-12	2.62375e-11	4.47547e-11	6.32757e-11	8.17923e-11	1.00313e-10	1.25007e-10
0.220095	-3.70411e-11	-1.23457e-11	9.26589e-12	2.00593e-11	2.16065e-11	5.70975e-11	8.64222e-11	1.01857e-10	1.23463e-10	0.0545	-1.00295e-10	-8.80672e-11	-8.64512e-11	-1.14085e-10	-1.12587e-10	-9.88611e-11	-1.01775e-10	-1.06505e-10	-1.15673e-10	0.220095	-3.55e-11	-1.55e-12	2.47e-11	4.78e-11	4.94e-11	6.33e-11	9.1e-11	1.02e-10	1.28e-10	0.0545	-1.85031e-09	-1.83958e-09	-1.83961e-09	-1.83808e-09	-1.83336e-09	-1.81493e-09	-1.83188e-09	-1.8396e-09	-1.8581e-09	0.220095	-3.08645e-11	6.17088e-12	1.23423e-11	3.08674e-11	4.78412e-11	5.86527e-11	8.64222e-11	9.5687e-11	1.23463e-10
0.2211	-4.16698e-11	-1.0803e-11	1.543e-11	9.26364e-12	2.00649e-11	5.24739e-11	8.79677e-11	1.04941e-10	1.18837e-10	0.05475	-8.95559e-11	-9.40766e-11	-8.80036e-11	-1.03518e-10	-1.04989e-10	-1.11007e-10	-9.57655e-11	-1.04916e-10	-1.08084e-10	0.2211	-2.01e-11	-3.09e-12	2.32e-11	3.55e-11	5.25e-11	6.48e-11	8.49e-11	8.8e-11	1.19e-10	0.05475	-1.84122e-09	-1.835e-09	-1.84716e-09	-1.83806e-09	-1.82575e-09	-1.81799e-09	-1.82417e-09	-1.83806e-09	-1.85505e-09	0.2211	-2.4692e-11	6.1737e-12	1.23485e-11	4.01214e-11	4.93851e-11	7.56096e-11	8.64261e-11	1.00311e-10	1.21916e-10
0.222105	-4.93806e-11	-9.26026e-12	1.38901e-11	9.25801e-12	2.46914e-11	5.40172e-11	9.10453e-11	1.01856e-10	1.26548e-10	0.055	-8.65058e-11	-8.96196e-11	-9.56108e-11	-1.12551e-10	-1.04952e-10	-1.04925e-10	-1.03327e-10	-9.88156e-11	-1.09591e-10	0.222105	-2.78e-11	-6.17e-12	2.47e-11	3.55e-11	5.25e-11	5.56e-11	8.33e-11	9.72e-11	1.19e-10	0.055	-1.84577e-09	-1.83649e-09	-1.82894e-09	-1.83952e-09	-1.82571e-09	-1.82106e-09	-1.81805e-09	-1.8381e-09	-1.85657e-09	0.222105	-1.69806e-11	7.71529e-12	1.85205e-11	3.85827e-11	5.09267e-11	6.1737e-11	9.25919e-11	9.87651e-11	1.11122e-10
0.22311	-4.4758e-11	-9.25745e-12	1.38884e-11	4.63267e-12	2.62386e-11	6.17235e-11	7.10029e-11	9.72325e-11	1.31176e-10	0.05525	-9.71359e-11	-1.03282e-10	-9.10992e-11	-1.03518e-10	-1.06496e-10	-9.57382e-11	-9.87974e-11	-1.00323e-10	-1.14176e-10	0.22311	-1.85e-11	3.08e-12	1.7e-11	3.55e-11	5.25e-11	5.25e-11	8.03e-11	8.03e-11	1.17e-10	0.05525	-1.85039e-09	-1.83498e-09	-1.83491e-09	-1.82894e-09	-1.82715e-09	-1.8211e-09	-1.82259e-09	-1.84562e-09	-1.85805e-09	0.22311	-2.16009e-11	6.1737e-12	2.77712e-11	3.85804e-11	4.78452e-11	6.32696e-11	8.48857e-11	8.33452e-11	1.15742e-10
0.224115	-4.78367e-11	-3.08995e-12	1.08035e-11	7.71473e-12	3.54905e-11	4.78474e-11	8.333e-11	1.08021e-10	1.26549e-10	0.0555	-9.26152e-11	-9.72178e-11	-9.41312e-11	-1.14139e-10	-1.09491e-10	-9.57109e-11	-9.8761e-11	-1.03364e-10	-1.14203e-10	0.224115	-2.16e-11	7.72e-12	3.24e-11	3.55e-11	5.86e-11	5.09e-11	7.56e-11	8.95e-11	1.05e-10	0.0555	-1.85354e-09	-1.83654e-09	-1.83189e-09	-1.8425e-09	-1.81191e-09	-1.82566e-09	-1.82263e-09	-1.82889e-09	-1.84894e-09	0.224115	-1.23513e-11	6.17088e-12	1.54402e-11	3.39528e-11	5.40127e-11	5.09362e-11	9.10475e-11	8.95088e-11	1.08034e-10
0.22512	-3.70427e-11	-6.17088e-12	9.25745e-12	6.17708e-12	3.08685e-11	4.93862e-11	7.56226e-11	9.56864e-11	1.21919e-10	0.05575	-9.11174e-11	-8.95832e-11	-9.56654e-11	-1.14139e-10	-9.8852e-11	-1.00295e-10	-9.72451e-11	-1.00368e-10	-1.14212e-10	0.22512	-1.54e-11	1.39e-11	2.93e-11	3.09e-11	5.09e-11	5.09e-11	6.79e-11	7.72e-11	1.06e-10	0.05575	-1.86568e-09	-1.84408e-09	-1.83033e-09	-1.82583e-09	-1.81184e-09	-1.82262e-09	-1.82419e-09	-1.82885e-09	-1.8534e-09	0.22512	-1.69767e-11	2.81514e-15	2.31453e-11	3.08707e-11	5.40138e-11	6.01774e-11	8.02541e-11	9.10532e-11	1.11113e-10
0.226125	-3.70388e-11	-3.08769e-12	1.54666e-12	1.54311e-11	3.39539e-11	5.4011e-11	7.25366e-11	9.10565e-11	1.1729e-10	0.056	-1.00241e-10	-9.41403e-11	-9.40948e-11	-1.03482e-10	-1.0182e-10	-1.01866e-10	-9.87338e-11	-1.06459e-10	-1.15764e-10	0.226125	-1.55e-12	1.08e-11	3.39e-11	2.93e-11	5.56e-11	5.86e-11	7.56e-11	8.95e-11	1.03e-10	0.056	-1.85348e-09	-1.82735e-09	-1.82727e-09	-1.83028e-09	-1.81642e-09	-1.81957e-09	-1.83025e-09	-1.83952e-09	-1.84428e-09	0.226125	-2.31453e-11	1.53765e-12	2.00632e-11	4.16613e-11	5.09284e-11	4.01372e-11	7.87058e-11	9.10549e-11	1.04946e-10
0.22713	-3.70377e-11	-3.08882e-12	3.08375e-12	2.00593e-11	4.1667e-11	4.78429e-11	7.56164e-11	9.41431e-11	1.14206e-10	0.05625	-9.72451e-11	-9.87519e-11	-8.49989e-11	-1.06468e-10	-9.87701e-11	-1.04907e-10	-9.42404e-11	-1.07912e-10	-1.20312e-10	0.22713	-1.54e-11	6.18e-12	2.47e-11	2.47e-11	4.01e-11	4.63e-11	7.1e-11	9.41e-11	1.08e-10	0.05625	-1.84119e-09	-1.8273e-09	-1.8273e-09	-1.82571e-09	-1.81641e-09	-1.82256e-09	-1.82264e-09	-1.8381e-09	-1.84422e-09	0.22713	-1.85188e-11	-1.23395e-11	1.85228e-11	3.24106e-11	4.78452e-11	5.24654e-11	7.25371e-11	9.41375e-11	1.06487e-10
0.228135	-3.39505e-11	-9.25857e-12	-3.08375e-12	1.54396e-11	4.47558e-11	4.47547e-11	6.6364e-11	1.04932e-10	1.18833e-10	0.0565	-9.72087e-11	-1.00286e-10	-9.56563e-11	-1.06496e-10	-9.57291e-11	-1.01839e-10	-1.06386e-10	-8.96924e-11	-1.1423e-10	0.228135	-6.18e-12	1.54e-11	1.39e-11	1.24e-11	4.63e-11	5.86e-11	7.1e-11	1.03e-10	1.05e-10	0.0565	-1.83809e-09	-1.83642e-09	-1.8364e-09	-1.82263e-09	-1.81029e-09	-1.81647e-09	-1.81797e-09	-1.84411e-09	-1.84426e-09	0.228135	-1.23496e-11	-7.7198e-12	2.62291e-11	2.77802e-11	5.40104e-11	4.7844e-11	7.4077e-11	8.95155e-11	1.09575e-10
0.22914	-2.62381e-11	-1.23446e-11	-1.5461e-12	2.93173e-11	4.93783e-11	4.01282e-11	6.4819e-11	8.48907e-11	1.2346e-10	0.05675	-9.4204e-11	-9.7236e-11	-1.0182e-10	-1.08012e-10	-1.00286e-10	-9.57382e-11	-1.01875e-10	-1.01711e-10	-1.12714e-10	0.22914	-9.26e-12	6.17e-12	1.23e-11	2.31e-11	3.09e-11	5.86e-11	7.41e-11	9.72e-11	1.06e-10	0.05675	-1.8411e-09	-1.83038e-09	-1.82734e-09	-1.8211e-09	-1.80718e-09	-1.81487e-09	-1.81035e-09	-1.83044e-09	-1.85027e-09	0.22914	-1.54323e-11	-1.2344e-11	1.54396e-11	2.62341e-11	4.78446e-11	4.93862e-11	7.40754e-11	9.87679e-11	1.17287e-10
0.230145	-2.4692e-11	-1.08035e-11	-7.71417e-12	2.93201e-11	3.55051e-11	4.32108e-11	6.63573e-11	9.25931e-11	1.20376e-10	0.057	-1.01748e-10	-9.56927e-11	-1.0182e-10	-1.06459e-10	-1.00332e-10	-9.86701e-11	-1.00332e-10	-8.96924e-11	-1.20331e-10	0.230145	-1.08e-11	-1.08e-11	9.26e-12	1.39e-11	3.55e-11	6.02e-11	7.56e-11	9.57e-11	1.2e-10	0.057	-1.83805e-09	-1.83178e-09	-1.83335e-09	-1.82415e-09	-1.80411e-09	-1.80878e-09	-1.81639e-09	-1.83488e-09	-1.8351e-09	0.230145	-1.69739e-11	-1.08052e-11	2.31481e-11	2.00644e-11	4.93856e-11	5.40138e-11	6.79056e-11	1.01854e-10	1.17291e-10
0.23115	-2.16077e-11	-1.0803e-11	-7.71698e-12	2.31532e-11	4.78328e-11	4.32097e-11	5.71088e-11	8.9511e-11	1.17288e-10	0.05725	-9.10628e-11	-9.56836e-11	-9.57382e-11	-1.0035e-10	-1.03364e-10	-8.50626e-11	-1.01848e-10	-1.07875e-10	-1.20376e-10	0.23115	-1.08e-11	4.62e-12	1.54e-12	1.54e-11	3.55e-11	7.1e-11	8.18e-11	9.88e-11	1.25e-10	0.05725	-1.83495e-09	-1.81664e-09	-1.82732e-09	-1.82566e-09	-1.80256e-09	-1.81184e-09	-1.81332e-09	-1.82572e-09	-1.8426e-09	0.23115	-1.23474e-11	-1.54317e-11	2.77718e-11	1.85177e-11	5.24621e-11	5.55605e-11	6.48218e-11	9.87718e-11	1.2192e-10
0.232155	-2.31481e-11	-1.08052e-11	-9.25745e-12	2.77785e-11	3.55028e-11	3.70427e-11	6.79017e-11	8.79694e-11	1.09579e-10	0.0575	-8.19214e-11	-9.56381e-11	-9.87338e-11	-1.00386e-10	-1.00332e-10	-1.01748e-10	-1.01911e-10	-1.00368e-10	-1.20331e-10	0.232155	-1.7e-11	-1.08e-11	-1.54e-12	1.7e-11	2.47e-11	6.94e-11	8.49e-11	1.1e-10	1.23e-10	0.0575	-1.83038e-09	-1.83318e-09	-1.83338e-09	-1.81953e-09	-1.80252e-09	-1.81944e-09	-1.80415e-09	-1.81961e-09	-1.83663e-09	0.232155	-1.08047e-11	-1.69733e-11	1.23502e-11	1.23513e-11	2.93359e-11	6.32718e-11	7.25281e-11	1.00316e-10	1.28087e-10
0.23316	-2.16065e-11	-1.69789e-11	-4.63098e-12	3.08612e-11	4.32097e-11	4.16675e-11	7.09882e-11	9.25965e-11	1.17286e-10	0.05775	-9.41039e-11	-8.8049e-11	-9.57109e-11	-1.12605e-10	-1.00359e-10	-1.00277e-10	-1.11107e-10	-1.01857e-10	-1.12732e-10	0.23316	-2.16e-11	-9.26e-12	-4.62e-12	2.32e-11	3.7e-11	7.25e-11	8.49e-11	1.08e-10	1.27e-10	0.05775	-1.83338e-09	-1.81043e-09	-1.83336e-09	-1.8134e-09	-1.79645e-09	-1.81177e-09	-1.80413e-09	-1.82727e-09	-1.8503e-09	0.23316	-1.38929e-11	-1.08041e-11	7.71304e-12	2.0061e-11	4.32046e-11	6.32763e-11	6.32808e-11	1.08025e-10	1.20381e-10
0.234165	-2.16048e-11	-3.086e-11	-3.08657e-12	2.16122e-11	4.47513e-11	4.32136e-11	6.63657e-11	9.56836e-11	1.15752e-10	0.058	-1.00241e-10	-9.41039e-11	-9.72087e-11	-1.15692e-10	-1.07993e-10	-9.26516e-11	-1.18751e-10	-1.034e-10	-1.17262e-10	0.234165	-2.47e-11	-1.23e-11	7.71e-12	3.24e-11	3.4e-11	7.56e-11	9.26e-11	1.11e-10	1.25e-10	0.058	-1.83033e-09	-1.8134e-09	-1.82272e-09	-1.81495e-09	-1.80096e-09	-1.79649e-09	-1.81024e-09	-1.83791e-09	-1.84727e-09	0.234165	-2.62324e-11	-7.71754e-12	-6.16638e-12	2.31493e-11	3.70433e-11	6.7905e-11	7.09877e-11	1.03402e-10	1.25005e-10
0.23517	-1.85262e-11	-2.93207e-11	-1.54385e-12	2.93173e-11	3.54972e-11	4.93806e-11	7.40754e-11	9.87701e-11	1.2963e-10	0.05825	-9.41767e-11	-9.41494e-11	-9.572e-11	-1.09591e-10	-1.09537e-10	-9.41403e-11	-1.12605e-10	-1.04998e-10	-1.17262e-10	0.23517	-2.47e-11	-1.85e-11	-3.08e-12	3.4e-11	4.63e-11	7.41e-11	9.72e-11	1.08e-10	1.31e-10	0.05825	-1.82567e-09	-1.82402e-09	-1.82873e-09	-1.824e-09	-1.79641e-09	-1.79946e-09	-1.81025e-09	-1.8258e-09	-1.83811e-09	0.23517	-2.93196e-11	-7.71642e-12	-1.54047e-12	2.62341e-11	4.32074e-11	7.40748e-11	6.94568e-11	1.04942e-10	1.2655e-10
0.236175	-3.39455e-11	-2.31498e-11	-1.54159e-12	2.31493e-11	3.08674e-11	4.32181e-11	7.5622e-11	1.01856e-10	1.26551e-10	0.0585	-9.41039e-11	-9.56745e-11	-1.00286e-10	-1.06514e-10	-1.04971e-10	-9.56745e-11	-9.73815e-11	-1.15619e-10	-1.12723e-10	0.236175	-3.4e-11	-1.24e-11	1.69e-15	3.86e-11	3.7e-11	7.87e-11	1e-10	1.08e-10	1.33e-10	0.0585	-1.81499e-09	-1.81036e-09	-1.82417e-09	-1.80578e-09	-1.79641e-09	-1.80102e-09	-1.80724e-09	-1.82878e-09	-1.83958e-09	0.236175	-2.46987e-11	-7.71135e-12	1.07968e-11	2.46931e-11	3.7045e-11	7.25349e-11	9.25858e-11	1.03401e-10	1.31177e-10
0.23718	-3.08696e-11	-1.85217e-11	3.08826e-12	1.69761e-11	3.08634e-11	5.40093e-11	8.02468e-11	1.01857e-10	1.29635e-10	0.05875	-8.80036e-11	-9.56563e-11	-1.00313e-10	-1.07984e-10	-1.05007e-10	-9.57109e-11	-1.07939e-10	-1.04943e-10	-1.18796e-10	0.23718	-4.63e-11	-2.16e-11	7.72e-12	3.86e-11	4.01e-11	7.25e-11	9.26e-11	1.03e-10	1.33e-10	0.05875	-1.81954e-09	-1.81174e-09	-1.82107e-09	-1.81018e-09	-1.80088e-09	-1.80403e-09	-1.81331e-09	-1.83024e-09	-1.83801e-09	0.23718	-3.70309e-11	6.16356e-12	6.17482e-12	2.46948e-11	4.7835e-11	7.25326e-11	8.48829e-11	1.04941e-10	1.29635e-10
0.238185	-3.85787e-11	-2.00599e-11	1.23423e-11	1.08075e-11	2.46942e-11	4.9389e-11	7.40815e-11	1.03401e-10	1.31183e-10	0.059	-8.79399e-11	-9.11174e-11	-1.00341e-10	-1.01893e-10	-1.15646e-10	-1.00241e-10	-1.03418e-10	-9.42131e-11	-1.18806e-10	0.238185	-4.32e-11	-1.08e-11	1.23e-11	4.01e-11	4.78e-11	6.94e-11	9.57e-11	1.14e-10	1.37e-10	0.059	-1.82564e-09	-1.80108e-09	-1.81646e-09	-1.79965e-09	-1.78416e-09	-1.79499e-09	-1.81178e-09	-1.81663e-09	-1.82885e-09	0.238185	-2.77842e-11	-6.16469e-12	6.17426e-12	3.08651e-11	4.01299e-11	6.79101e-11	8.33407e-11	1.00315e-10	1.25007e-10
0.23919	-3.70377e-11	-1.38901e-11	1.08035e-11	1.69778e-11	2.31498e-11	5.55582e-11	7.87063e-11	1.06484e-10	1.43521e-10	0.05925	-8.34101e-11	-9.71723e-11	-1.04916e-10	-1.01884e-10	-1.09637e-10	-9.26971e-11	-1.01929e-10	-9.57109e-11	-1.14276e-10	0.23919	-3.7e-11	-1.08e-11	1.54e-11	4.17e-11	4.78e-11	6.17e-11	8.95e-11	1.05e-10	1.27e-10	0.05925	-1.8211e-09	-1.80254e-09	-1.81491e-09	-1.81936e-09	-1.7886e-09	-1.81165e-09	-1.80412e-09	-1.83328e-09	-1.83036e-09	0.23919	-3.2405e-11	4.62478e-12	9.25857e-12	3.54933e-11	4.4753e-11	7.8699e-11	9.10492e-11	9.87718e-11	1.23463e-10
0.240195	-3.24118e-11	-9.2642e-12	1.08052e-11	2.77673e-11	2.31498e-11	6.17268e-11	8.02496e-11	1.01862e-10	1.45066e-10	0.0595	-9.09991e-11	-9.41494e-11	-1.04961e-10	-1.06468e-10	-1.14203e-10	-1.01829e-10	-1.1256e-10	-1.01811e-10	-1.21856e-10	0.240195	-3.7e-11	-1.08e-11	7.73e-12	4.01e-11	5.4e-11	6.64e-11	8.64e-11	9.26e-11	1.31e-10	0.0595	-1.82112e-09	-1.80098e-09	-1.81491e-09	-1.81032e-09	-1.78255e-09	-1.80107e-09	-1.79956e-09	-1.82726e-09	-1.83641e-09	0.240195	-2.6233e-11	1.54835e-12	9.2597e-12	3.39528e-11	4.32148e-11	6.63634e-11	8.64267e-11	1.01855e-10	1.21918e-10
0.2412	-3.5495e-11	-1.69682e-11	1.69716e-11	6.18271e-12	2.46931e-11	5.55633e-11	7.87114e-11	1.11114e-10	1.38901e-10	0.05975	-8.95195e-11	-9.26425e-11	-1.07957e-10	-1.07975e-10	-1.1876e-10	-1.06414e-10	-1.06523e-10	-1.00332e-10	-1.18878e-10	0.2412	-3.7e-11	7.71e-12	2.62e-11	4.48e-11	5.56e-11	6.17e-11	8.95e-11	9.88e-11	1.22e-10	0.05975	-1.82869e-09	-1.79335e-09	-1.81647e-09	-1.80872e-09	-1.78555e-09	-1.79948e-09	-1.81015e-09	-1.82265e-09	-1.82574e-09	0.2412	-1.2353e-11	1.23412e-11	9.26139e-12	3.39539e-11	4.93856e-11	6.01892e-11	8.95088e-11	1.00312e-10	1.17293e-10
0.242205	-3.70388e-11	-3.09332e-12	1.08035e-11	1.07979e-11	2.77797e-11	6.3269e-11	8.79627e-11	1.12657e-10	1.46608e-10	0.06	-8.95559e-11	-9.87338e-11	-9.88793e-11	-1.00395e-10	-1.11153e-10	-9.87974e-11	-1.06487e-10	-1.0182e-10	-1.23444e-10	0.242205	-2.32e-11	6.17e-12	3.24e-11	4.32e-11	5.4e-11	5.71e-11	7.56e-11	9.57e-11	1.2e-10	0.06	-1.81955e-09	-1.79477e-09	-1.8225e-09	-1.8057e-09	-1.78406e-09	-1.79946e-09	-1.80116e-09	-1.82411e-09	-1.82107e-09	0.242205	-1.69744e-11	9.25914e-12	1.38873e-11	3.85804e-11	5.7097e-11	5.71026e-11	8.79677e-11	9.56858e-11	1.23456e-10
0.24321	-3.8586e-11	-7.71304e-12	6.17482e-12	1.54835e-12	3.24073e-11	5.55582e-11	8.488e-11	1.08031e-10	1.43528e-10	0.06025	-9.70813e-11	-9.8761e-11	-1.07975e-10	-1.06477e-10	-1.09555e-10	-9.57382e-11	-1.06459e-10	-9.72815e-11	-1.24942e-10	0.24321	-1.7e-11	4.63e-12	2.78e-11	5.25e-11	6.33e-11	5.71e-11	7.41e-11	8.8e-11	1.28e-10	0.06025	-1.81341e-09	-1.78411e-09	-1.80883e-09	-1.81172e-09	-1.7871e-09	-1.79798e-09	-1.81629e-09	-1.81651e-09	-1.81654e-09	0.24321	-1.69744e-11	4.63041e-12	1.23491e-11	3.85827e-11	5.24722e-11	5.71037e-11	8.79666e-11	9.72218e-11	1.1112e-10
0.244215	-5.09199e-11	-3.08826e-12	6.17426e-12	6.17313e-12	3.2409e-11	4.78446e-11	8.02485e-11	1.06484e-10	1.4661e-10	0.0605	-8.04145e-11	-9.71996e-11	-1.08075e-10	-1.11089e-10	-1.05034e-10	-1.01793e-10	-1.01866e-10	-1.01848e-10	-1.15801e-10	0.244215	-1.85e-11	1.08e-11	2.47e-11	4.17e-11	5.56e-11	4.94e-11	7.25e-11	9.57e-11	1.2e-10	0.0605	-1.81644e-09	-1.7856e-09	-1.81179e-09	-1.80265e-09	-1.78547e-09	-1.80549e-09	-1.80574e-09	-1.81947e-09	-1.82715e-09	0.244215	-1.23457e-11	1.54385e-12	1.85211e-11	4.01203e-11	4.93885e-11	6.3269e-11	8.6425e-11	8.48874e-11	1.09574e-10
0.24522	-4.01293e-11	-3.08713e-12	9.25689e-12	1.08024e-11	3.24078e-11	4.78452e-11	6.9454e-11	9.87752e-11	1.45066e-10	0.06075	-9.09718e-11	-9.11083e-11	-1.15646e-10	-1.1108e-10	-1.15619e-10	-9.72815e-11	-9.87883e-11	-1.04889e-10	-1.15774e-10	0.24522	-9.26e-12	9.26e-12	3.24e-11	3.4e-11	5.86e-11	4.63e-11	7.56e-11	8.33e-11	1.1e-10	0.06075	-1.81952e-09	-1.79019e-09	-1.81025e-09	-1.80866e-09	-1.76562e-09	-1.78728e-09	-1.81169e-09	-1.81182e-09	-1.82106e-09	0.24522	-6.17595e-12	-2.81514e-15	2.93151e-11	2.77881e-11	5.55565e-11	5.40189e-11	8.79632e-11	9.10515e-11	1.11114e-10
0.246225	-4.01254e-11	-4.62985e-12	4.63098e-12	1.38901e-11	2.93286e-11	5.70959e-11	7.5617e-11	1.04939e-10	1.37357e-10	0.061	-8.79854e-11	-9.41312e-11	-1.06578e-10	-1.05016e-10	-1.05025e-10	-1.01829e-10	-9.88156e-11	-9.87883e-11	-1.2034e-10	0.246225	-7.71e-12	1.23e-11	3.39e-11	3.24e-11	5.25e-11	4.78e-11	7.25e-11	9.26e-11	1.19e-10	0.061	-1.82101e-09	-1.7917e-09	-1.80565e-09	-1.80263e-09	-1.76248e-09	-1.79472e-09	-1.7965e-09	-1.80562e-09	-1.81187e-09	0.246225	-7.71698e-12	-9.25463e-12	2.00683e-11	4.01186e-11	5.71004e-11	5.55554e-11	7.87097e-11	9.10549e-11	1.06492e-10
0.24723	-4.01231e-11	-6.17426e-12	3.086e-12	1.85183e-11	4.32046e-11	5.09267e-11	7.09905e-11	9.87701e-11	1.4198e-10	0.06125	-8.79217e-11	-9.56472e-11	-1.12578e-10	-1.10998e-10	-1.08021e-10	-1.01875e-10	-1.06459e-10	-9.57655e-11	-1.18878e-10	0.24723	-1.55e-12	3.09e-12	2.47e-11	2.78e-11	4.94e-11	5.4e-11	6.94e-11	8.95e-11	1.11e-10	0.06125	-1.81186e-09	-1.78407e-09	-1.80255e-09	-1.80862e-09	-1.76854e-09	-1.78262e-09	-1.80097e-09	-1.79646e-09	-1.81182e-09	0.24723	-1.0803e-11	-4.63098e-12	2.62319e-11	3.39511e-11	5.55554e-11	4.93873e-11	7.5622e-11	9.4138e-11	1.17288e-10
0.248235	-3.39522e-11	-1.08024e-11	-1.68909e-15	2.00644e-11	3.70433e-11	4.01299e-11	6.48224e-11	9.25993e-11	1.40438e-10	0.0615	-8.0369e-11	-9.10992e-11	-1.05025e-10	-9.73178e-11	-1.09546e-10	-1.04907e-10	-1.09537e-10	-1.0645e-10	-1.24924e-10	0.248235	-6.17e-12	6.17e-12	1.7e-11	2.78e-11	3.86e-11	5.56e-11	6.95e-11	8.95e-11	1.13e-10	0.0615	-1.81034e-09	-1.78252e-09	-1.79795e-09	-1.79643e-09	-1.764e-09	-1.79167e-09	-1.7979e-09	-1.80098e-09	-1.81332e-09	0.248235	-1.38873e-11	-3.08657e-12	2.16048e-11	2.46942e-11	4.6303e-11	4.93856e-11	7.56164e-11	9.10571e-11	1.23459e-10
0.24924	-2.77814e-11	-1.3889e-11	-7.71417e-12	2.62336e-11	4.32074e-11	4.16653e-11	7.09843e-11	9.25965e-11	1.37352e-10	0.06175	-9.25242e-11	-9.41221e-11	-1.11098e-10	-9.87065e-11	-1.06532e-10	-1.01939e-10	-1.06468e-10	-1.11035e-10	-1.17381e-10	0.24924	-1.08e-11	6.17e-12	7.72e-12	4.64e-12	4.63e-11	6.02e-11	7.87e-11	1e-10	1.3e-10	0.06175	-1.82096e-09	-1.78557e-09	-1.79791e-09	-1.79178e-09	-1.76402e-09	-1.78714e-09	-1.79028e-09	-1.80107e-09	-1.80877e-09	0.24924	-1.08035e-11	-1.54666e-12	1.38946e-11	2.00644e-11	4.93828e-11	5.09289e-11	6.3278e-11	9.72291e-11	1.18835e-10
0.250245	-2.77763e-11	-1.5434e-11	-9.25914e-12	2.62353e-11	3.70439e-11	3.39573e-11	5.86504e-11	9.10532e-11	1.32721e-10	0.062	-9.25697e-11	-9.41221e-11	-1.14121e-10	-8.96378e-11	-1.11098e-10	-1.1256e-10	-1.00368e-10	-1.01957e-10	-1.24933e-10	0.250245	-4.64e-12	6.17e-12	3.09e-12	1.85e-11	4.17e-11	7.1e-11	7.87e-11	1.06e-10	1.25e-10	0.062	-1.81185e-09	-1.78716e-09	-1.79487e-09	-1.79172e-09	-1.77158e-09	-1.78555e-09	-1.79484e-09	-1.81021e-09	-1.81171e-09	0.250245	-9.26083e-12	-9.25857e-12	2.00604e-11	2.00616e-11	4.63019e-11	5.40144e-11	6.01909e-11	1.09566e-10	1.20377e-10
0.25125	-2.00678e-11	-2.00621e-11	-9.25857e-12	2.46937e-11	4.47507e-11	4.01237e-11	6.17308e-11	8.79672e-11	1.25009e-10	0.06225	-8.79763e-11	-9.1081e-11	-1.03473e-10	-1.01766e-10	-1.12623e-10	-1.06496e-10	-1.03391e-10	-1.09482e-10	-1.20358e-10	0.25125	-2.16e-11	-9.25e-12	3.09e-12	1.54e-11	3.09e-11	6.64e-11	8.33e-11	1.06e-10	1.39e-10	0.06225	-1.80874e-09	-1.79476e-09	-1.79634e-09	-1.78714e-09	-1.7609e-09	-1.77951e-09	-1.79943e-09	-1.80869e-09	-1.79803e-09	0.25125	-1.08069e-11	-1.38856e-11	2.00599e-11	1.69744e-11	5.24666e-11	5.55565e-11	6.48168e-11	1.01861e-10	1.23466e-10
0.252255	-2.62324e-11	-2.31481e-11	-6.17201e-12	2.62347e-11	4.01276e-11	4.16703e-11	6.32746e-11	8.48845e-11	1.2655e-10	0.0625	-8.49352e-11	-9.26152e-11	-1.04916e-10	-9.8761e-11	-1.08021e-10	-1.01884e-10	-1.04943e-10	-1.01884e-10	-1.12723e-10	0.252255	-1.54e-11	-3.09e-12	0	2.47e-11	3.55e-11	8.33e-11	8.49e-11	1.1e-10	1.28e-10	0.0625	-1.80716e-09	-1.78866e-09	-1.79024e-09	-1.78561e-09	-1.7517e-09	-1.79166e-09	-1.79786e-09	-1.80099e-09	-1.80102e-09	0.252255	-2.31447e-11	-7.72205e-12	1.23468e-11	9.26252e-12	4.47552e-11	5.24745e-11	6.63634e-11	1.06485e-10	1.3426e-10
0.25326	-2.31515e-11	-2.31498e-11	-1.12606e-15	2.46948e-11	4.16687e-11	4.78373e-11	6.4819e-11	9.25942e-11	1.31181e-10	0.06275	-9.10173e-11	-9.72542e-11	-1.01911e-10	-9.41949e-11	-1.0192e-10	-1.01884e-10	-1.06459e-10	-9.8852e-11	-1.15701e-10	0.25326	-2.78e-11	-1.08e-11	-3.09e-12	2.16e-11	2.47e-11	8.18e-11	9.1e-11	1.14e-10	1.3e-10	0.06275	-1.80108e-09	-1.78103e-09	-1.78867e-09	-1.78857e-09	-1.75469e-09	-1.78863e-09	-1.78572e-09	-1.79028e-09	-1.80561e-09	0.25326	-2.31481e-11	-1.69677e-11	6.17651e-12	9.26477e-12	3.70382e-11	5.71021e-11	7.40737e-11	1.06487e-10	1.29637e-10
0.254265	-2.62324e-11	-2.46914e-11	3.08488e-12	2.93162e-11	4.32063e-11	4.16737e-11	6.94506e-11	9.25987e-11	1.41974e-10	0.063	-9.10719e-11	-1.06377e-10	-1.07939e-10	-9.87519e-11	-1.06523e-10	-1.06441e-10	-1.034e-10	-1.09473e-10	-1.11253e-10	0.254265	-3.55e-11	-1.39e-11	-4.63e-12	2.47e-11	3.4e-11	7.1e-11	8.49e-11	1.11e-10	1.34e-10	0.063	-1.80563e-09	-1.78708e-09	-1.78867e-09	-1.77492e-09	-1.75326e-09	-1.77953e-09	-1.79788e-09	-1.79173e-09	-1.80562e-09	0.254265	-2.00644e-11	-3.09445e-12	9.25745e-12	2.31459e-11	2.77842e-11	6.32712e-11	7.0995e-11	1.06487e-10	1.28095e-10
0.25527	-2.00683e-11	-2.31509e-11	1.54385e-12	1.6984e-11	2.93291e-11	4.93851e-11	8.17884e-11	9.72246e-11	1.29646e-10	0.06325	-9.40948e-11	-9.73178e-11	-9.88975e-11	-1.00277e-10	-1.1718e-10	-1.03473e-10	-1.00323e-10	-1.03509e-10	-1.29508e-10	0.25527	-3.24e-11	-2.31e-11	-2.82e-15	3.09e-11	3.7e-11	7.56e-11	9.26e-11	1.14e-10	1.36e-10	0.06325	-1.80867e-09	-1.78553e-09	-1.78867e-09	-1.78545e-09	-1.76696e-09	-1.79159e-09	-1.80245e-09	-1.79018e-09	-1.80257e-09	0.25527	-2.16116e-11	-1.07979e-11	6.17257e-12	2.77769e-11	3.2409e-11	6.01909e-11	7.87035e-11	1.06489e-10	1.32718e-10
0.256275	-2.93196e-11	-2.6233e-11	1.54441e-12	2.62324e-11	3.395e-11	5.70987e-11	7.87108e-11	9.56858e-11	1.45062e-10	0.0635	-8.95377e-11	-1.03373e-10	-1.11016e-10	-9.57291e-11	-1.09637e-10	-1.12523e-10	-9.88156e-11	-1.15601e-10	-1.26476e-10	0.256275	-2.93e-11	-1.7e-11	-3.08e-12	3.55e-11	4.63e-11	7.87e-11	9.26e-11	1.11e-10	1.45e-10	0.0635	-1.80261e-09	-1.77638e-09	-1.78874e-09	-1.77488e-09	-1.76399e-09	-1.77645e-09	-1.78878e-09	-1.7841e-09	-1.80249e-09	0.256275	-3.85725e-11	-4.62985e-12	1.54666e-12	2.62336e-11	3.70382e-11	6.48162e-11	7.56237e-11	1.14197e-10	1.26553e-10
0.25728	-3.08645e-11	-2.16065e-11	4.63154e-12	2.6233e-11	3.24078e-11	5.70998e-11	8.48767e-11	1.00313e-10	1.41985e-10	0.06375	-8.95377e-11	-1.04898e-10	-1.06487e-10	-9.8761e-11	-1.12578e-10	-9.88793e-11	-1.0487e-10	-1.035e-10	-1.11217e-10	0.25728	-3.7e-11	-2.31e-11	1.55e-12	4.17e-11	4.63e-11	7.41e-11	8.8e-11	1.11e-10	1.31e-10	0.06375	-1.80562e-09	-1.77786e-09	-1.8009e-09	-1.78089e-09	-1.76393e-09	-1.78247e-09	-1.79473e-09	-1.78863e-09	-1.79185e-09	0.25728	-2.93258e-11	1.54216e-12	6.17201e-12	1.85267e-11	4.01242e-11	6.48224e-11	8.02502e-11	1.06487e-10	1.29638e-10
0.258285	-2.9323e-11	-1.85194e-11	1.23446e-11	1.85205e-11	2.77774e-11	5.24773e-11	8.02524e-11	1.04943e-10	1.46611e-10	0.064	-9.41221e-11	-9.88156e-11	-1.01866e-10	-1.00341e-10	-1.01957e-10	-1.03364e-10	-9.88065e-11	-1.0793e-10	-1.12641e-10	0.258285	-3.86e-11	-7.73e-12	1.23e-11	3.86e-11	5.71e-11	7.72e-11	9.26e-11	1.05e-10	1.4e-10	0.064	-1.80562e-09	-1.77936e-09	-1.79486e-09	-1.77635e-09	-1.75636e-09	-1.78555e-09	-1.78256e-09	-1.78711e-09	-1.79787e-09	0.258285	-2.93263e-11	4.63041e-12	7.71754e-12	3.08629e-11	4.01265e-11	7.71563e-11	8.33373e-11	9.87735e-11	1.37344e-10
0.25929	-2.93258e-11	-1.54328e-11	1.54289e-11	1.38907e-11	1.85262e-11	6.32712e-11	8.02547e-11	1.0957e-10	1.48155e-10	0.06425	-9.56381e-11	-1.00277e-10	-9.87883e-11	-1.0645e-10	-1.08021e-10	-1.01866e-10	-9.87701e-11	-9.57837e-11	-1.11171e-10	0.25929	-4.01e-11	-2.16e-11	1.39e-11	4.17e-11	5.09e-11	7.25e-11	8.8e-11	1.03e-10	1.31e-10	0.06425	-1.80251e-09	-1.77334e-09	-1.79178e-09	-1.77631e-09	-1.76546e-09	-1.78404e-09	-1.78096e-09	-1.78411e-09	-1.7949e-09	0.25929	-4.01203e-11	9.25689e-12	1.23446e-11	3.54921e-11	4.32131e-11	6.79073e-11	8.64233e-11	1.00312e-10	1.21926e-10
0.260295	-3.85798e-11	-1.23463e-11	7.72261e-12	1.23446e-11	2.77752e-11	6.48134e-11	9.10481e-11	1.04949e-10	1.49697e-10	0.0645	-8.95741e-11	-9.57291e-11	-9.87883e-11	-1.06496e-10	-1.12632e-10	-1.01875e-10	-9.87701e-11	-1.00323e-10	-1.18751e-10	0.260295	-3.09e-11	-7.72e-12	1.7e-11	5.09e-11	5.25e-11	5.71e-11	8.18e-11	1.06e-10	1.37e-10	0.0645	-1.79185e-09	-1.78547e-09	-1.79327e-09	-1.7748e-09	-1.76551e-09	-1.78246e-09	-1.78095e-09	-1.79329e-09	-1.80245e-09	0.260295	-3.70332e-11	6.17764e-12	1.2348e-11	3.08691e-11	4.93851e-11	6.63629e-11	8.79666e-11	9.87724e-11	1.23462e-10
0.2613	-4.16698e-11	-9.25914e-12	1.69699e-11	6.17651e-12	2.62386e-11	5.40211e-11	8.64244e-11	1.15737e-10	1.48157e-10	0.06475	-9.40857e-11	-9.87701e-11	-1.01857e-10	-1.07975e-10	-1.1266e-10	-1.04934e-10	-9.87883e-11	-1.06468e-10	-1.12687e-10	0.2613	-2.78e-11	-4.63e-12	2.16e-11	4.01e-11	5.56e-11	6.17e-11	8.49e-11	9.72e-11	1.13e-10	0.06475	-1.79791e-09	-1.77951e-09	-1.79019e-09	-1.77782e-09	-1.76397e-09	-1.77481e-09	-1.78094e-09	-1.80086e-09	-1.79187e-09	0.2613	-1.85267e-11	1.543e-11	1.69739e-11	3.54955e-11	5.55554e-11	6.94455e-11	8.7966e-11	1.03397e-10	1.2346e-10
0.262305	-4.78367e-11	-4.63267e-12	9.26533e-12	9.2597e-12	3.24078e-11	6.01864e-11	8.33396e-11	1.01863e-10	1.5124e-10	0.065	-8.95468e-11	-1.01829e-10	-1.04889e-10	-1.00359e-10	-1.12623e-10	-1.06477e-10	-1.01802e-10	-1.09491e-10	-1.11135e-10	0.262305	-2.62e-11	1.54e-12	2.16e-11	4.63e-11	6.02e-11	5.71e-11	7.72e-11	9.88e-11	1.25e-10	0.065	-1.80093e-09	-1.79009e-09	-1.78409e-09	-1.77333e-09	-1.76246e-09	-1.77322e-09	-1.77939e-09	-1.78262e-09	-1.8009e-09	0.262305	-2.00621e-11	1.69711e-11	1.54362e-11	4.01231e-11	5.40155e-11	6.63618e-11	8.48829e-11	1.00311e-10	1.1729e-10
0.26331	-4.01304e-11	-7.7136e-12	1.69739e-11	1.23423e-11	3.54921e-11	6.17274e-11	8.64222e-11	1.04943e-10	1.49701e-10	0.06525	-9.10537e-11	-1.0035e-10	-9.88156e-11	-1.00323e-10	-1.06532e-10	-1.06523e-10	-9.57928e-11	-9.88702e-11	-1.12651e-10	0.26331	-2.62e-11	-3.08e-12	2.01e-11	3.24e-11	5.25e-11	4.94e-11	8.02e-11	9.57e-11	1.25e-10	0.06525	-1.79026e-09	-1.78099e-09	-1.78711e-09	-1.78546e-09	-1.76547e-09	-1.77026e-09	-1.7748e-09	-1.78552e-09	-1.79177e-09	0.26331	-2.00649e-11	4.63548e-12	2.31447e-11	3.8581e-11	5.40155e-11	6.48185e-11	8.79643e-11	9.10571e-11	1.11121e-10
0.264315	-4.62929e-11	-3.086e-12	1.85183e-11	4.6383e-12	2.93235e-11	5.24767e-11	8.48789e-11	1.06485e-10	1.55866e-10	0.0655	-9.25788e-11	-1.04943e-10	-1.00332e-10	-1.01829e-10	-1.0803e-10	-1.1256e-10	-1.07939e-10	-1.04889e-10	-1.12714e-10	0.264315	-1.85e-11	3.09e-12	2.16e-11	3.55e-11	6.17e-11	4.78e-11	7.41e-11	8.49e-11	1.22e-10	0.0655	-1.78867e-09	-1.77949e-09	-1.78859e-09	-1.77786e-09	-1.76089e-09	-1.7854e-09	-1.77477e-09	-1.77794e-09	-1.78565e-09	0.264315	-2.62268e-11	7.71473e-12	1.85211e-11	3.39534e-11	5.55554e-11	6.48162e-11	8.33407e-11	9.10554e-11	1.17288e-10
0.26532	-3.70433e-11	3.08094e-12	1.69711e-11	2.00537e-11	2.62431e-11	5.70981e-11	7.87041e-11	1.03397e-10	1.46616e-10	0.06575	-9.10446e-11	-1.09491e-10	-1.04889e-10	-9.8761e-11	-1.09591e-10	-1.01957e-10	-1.04971e-10	-1.01939e-10	-1.21819e-10	0.26532	-1.08e-11	1.08e-11	2.62e-11	3.09e-11	5.25e-11	5.09e-11	6.64e-11	9.11e-11	1.17e-10	0.06575	-1.78861e-09	-1.79165e-09	-1.77791e-09	-1.77023e-09	-1.75632e-09	-1.77024e-09	-1.77323e-09	-1.78398e-09	-1.79172e-09	0.26532	-7.7288e-12	6.17426e-12	1.85245e-11	3.24095e-11	4.93907e-11	6.01875e-11	8.7961e-11	9.56825e-11	1.20372e-10
0.266325	-4.01231e-11	-6.16863e-12	1.55173e-12	1.08103e-11	4.32035e-11	5.24722e-11	6.32825e-11	9.26055e-11	1.48155e-10	0.066	-8.80309e-11	-1.00414e-10	-1.00368e-10	-9.42495e-11	-1.14167e-10	-1.07902e-10	-1.06423e-10	-1.12551e-10	-1.14203e-10	0.266325	-9.26e-12	1.39e-11	1.54e-11	3.09e-11	5.86e-11	5.09e-11	6.64e-11	9.88e-11	1.17e-10	0.066	-1.77944e-09	-1.78716e-09	-1.77481e-09	-1.77626e-09	-1.76234e-09	-1.77011e-09	-1.77174e-09	-1.78098e-09	-1.79174e-09	0.266325	-2.31391e-11	7.71304e-12	3.23994e-11	3.2409e-11	5.86391e-11	5.40161e-11	7.56226e-11	9.72257e-11	1.12663e-10
0.26733	-3.70382e-11	-3.08769e-12	9.25182e-12	2.1602e-11	3.70427e-11	4.93823e-11	6.94455e-11	1.04935e-10	1.48152e-10	0.06625	-9.56381e-11	-1.07975e-10	-1.0488e-10	-1.07884e-10	-1.12696e-10	-9.26971e-11	-9.73269e-11	-1.0498e-10	-1.06596e-10	0.26733	-1.08e-11	1.08e-11	1.39e-11	2.01e-11	4.32e-11	5.4e-11	7.25e-11	8.8e-11	1.17e-10	0.06625	-1.77641e-09	-1.78866e-09	-1.77785e-09	-1.77326e-09	-1.75323e-09	-1.764e-09	-1.77931e-09	-1.78247e-09	-1.79019e-09	0.26733	-1.08097e-11	2.81514e-15	2.00706e-11	3.24067e-11	5.2475e-11	5.09278e-11	6.79095e-11	9.56813e-11	1.14206e-10
0.268335	-3.24112e-11	-3.08938e-12	-4.62647e-12	2.16088e-11	4.16675e-11	3.85855e-11	6.94494e-11	9.56864e-11	1.40443e-10	0.0665	-9.57109e-11	-1.06541e-10	-9.87883e-11	-9.7336e-11	-1.17262e-10	-9.41312e-11	-1.04852e-10	-1.03409e-10	-1.17199e-10	0.268335	-1.39e-11	6.18e-12	1.23e-11	2.47e-11	3.86e-11	5.71e-11	7.87e-11	9.57e-11	1.2e-10	0.0665	-1.78853e-09	-1.78867e-09	-1.77935e-09	-1.77478e-09	-1.75471e-09	-1.76246e-09	-1.77019e-09	-1.7794e-09	-1.78562e-09	0.268335	-1.69705e-11	-5.63029e-16	2.93184e-11	2.62392e-11	5.55548e-11	4.63036e-11	7.40737e-11	8.79734e-11	1.23458e-10
0.26934	-3.395e-11	-1.08007e-11	-9.25689e-12	2.93184e-11	4.32119e-11	3.70422e-11	7.40725e-11	9.41386e-11	1.45062e-10	0.06675	-1.00232e-10	-1.1413e-10	-9.572e-11	-1.04916e-10	-1.17253e-10	-9.42222e-11	-9.73178e-11	-1.03427e-10	-1.12651e-10	0.26934	-9.26e-12	9.25e-12	1.7e-11	2.01e-11	3.09e-11	5.86e-11	7.41e-11	1.03e-10	1.27e-10	0.06675	-1.77796e-09	-1.78861e-09	-1.77174e-09	-1.77628e-09	-1.75617e-09	-1.7655e-09	-1.76861e-09	-1.77479e-09	-1.78865e-09	0.26934	-7.71811e-12	-1.54666e-12	2.77769e-11	2.9319e-11	4.93862e-11	5.55526e-11	6.94506e-11	9.7228e-11	1.2038e-10
0.270345	-2.93207e-11	-1.2348e-11	-6.17482e-12	2.62381e-11	4.47518e-11	4.47502e-11	6.48196e-11	8.79677e-11	1.3273e-10	0.067	-9.11174e-11	-1.0961e-10	-9.87701e-11	-1.08057e-10	-1.11135e-10	-1.07921e-10	-1.04843e-10	-1.07993e-10	-1.06559e-10	0.270345	-1.23e-11	-1.54e-12	7.72e-12	2.62e-11	3.55e-11	7.1e-11	7.41e-11	1.05e-10	1.2e-10	0.067	-1.78399e-09	-1.77957e-09	-1.77318e-09	-1.77172e-09	-1.7441e-09	-1.76552e-09	-1.76857e-09	-1.77168e-09	-1.78861e-09	0.270345	-3.09389e-12	-1.23429e-11	2.00649e-11	2.31509e-11	4.62996e-11	4.93913e-11	7.25326e-11	1.09568e-10	1.28089e-10
0.27135	-2.00649e-11	-1.85132e-11	-7.71473e-12	2.93218e-11	3.70416e-11	3.85849e-11	6.01948e-11	8.33418e-11	1.41978e-10	0.06725	-9.26334e-11	-1.11098e-10	-1.01793e-10	-1.15646e-10	-1.08094e-10	-1.03382e-10	-9.57564e-11	-1.06468e-10	-1.12687e-10	0.27135	-9.27e-12	-4.63e-12	9.26e-12	1.7e-11	3.24e-11	7.1e-11	8.49e-11	1.13e-10	1.34e-10	0.06725	-1.78251e-09	-1.79778e-09	-1.76554e-09	-1.77177e-09	-1.76381e-09	-1.76551e-09	-1.76248e-09	-1.76711e-09	-1.77948e-09	0.27135	-1.85138e-11	-1.38884e-11	1.85166e-11	2.16048e-11	4.62968e-11	6.01847e-11	7.09939e-11	1.06487e-10	1.2655e-10
0.272355	-1.69806e-11	-7.72711e-12	-4.63041e-12	3.0864e-11	3.70405e-11	4.01254e-11	7.40697e-11	9.10509e-11	1.38896e-10	0.0675	-1.00241e-10	-1.09519e-10	-9.42313e-11	-1.06587e-10	-1.15701e-10	-9.58201e-11	-9.87974e-11	-1.01839e-10	-1.23299e-10	0.272355	-2.47e-11	-7.72e-12	4.63e-12	2.01e-11	2.78e-11	7.25e-11	8.33e-11	1.14e-10	1.27e-10	0.0675	-1.78398e-09	-1.7918e-09	-1.76247e-09	-1.78535e-09	-1.7563e-09	-1.76398e-09	-1.76394e-09	-1.77013e-09	-1.78243e-09	0.272355	-1.85222e-11	-1.23491e-11	9.26308e-12	1.69801e-11	4.16675e-11	6.1733e-11	7.71602e-11	1.03399e-10	1.2655e-10
0.27336	-2.62302e-11	-2.62279e-11	-3.08488e-12	2.77808e-11	4.16687e-11	4.16692e-11	6.63657e-11	9.10577e-11	1.37355e-10	0.06775	-9.56654e-11	-9.88611e-11	-1.0182e-10	-1.14167e-10	-1.15737e-10	-1.11035e-10	-1.0645e-10	-9.42222e-11	-1.06605e-10	0.27336	-2.93e-11	-1.23e-11	2.25e-15	3.09e-11	3.55e-11	7.56e-11	8.95e-11	1.17e-10	1.36e-10	0.06775	-1.77634e-09	-1.7933e-09	-1.76556e-09	-1.76105e-09	-1.75623e-09	-1.76397e-09	-1.75936e-09	-1.77015e-09	-1.77483e-09	0.27336	-2.62302e-11	-1.85149e-11	9.2597e-12	2.31447e-11	3.39539e-11	6.79005e-11	7.25349e-11	9.8773e-11	1.28096e-10
0.274365	-2.00689e-11	-2.31504e-11	3.08206e-12	2.93218e-11	4.62985e-11	4.47569e-11	7.09916e-11	1.01852e-10	1.43521e-10	0.068	-8.8049e-11	-1.03382e-10	-1.034e-10	-1.1571e-10	-1.14203e-10	-1.12596e-10	-1.07966e-10	-1.00304e-10	-1.09564e-10	0.274365	-2.78e-11	-1.7e-11	1.54e-12	3.39e-11	2.93e-11	8.18e-11	9.26e-11	1.22e-10	1.48e-10	0.068	-1.77173e-09	-1.7948e-09	-1.77618e-09	-1.76399e-09	-1.75166e-09	-1.76395e-09	-1.75775e-09	-1.77018e-09	-1.77634e-09	0.274365	-1.85262e-11	-1.23485e-11	9.25632e-12	1.69778e-11	3.08707e-11	6.32774e-11	6.94511e-11	1.01858e-10	1.40431e-10
0.27537	-3.08584e-11	-2.31487e-11	-3.08375e-12	2.93213e-11	5.09182e-11	5.24688e-11	7.71653e-11	1.00318e-10	1.38903e-10	0.06825	-9.4113e-11	-1.0487e-10	-1.04898e-10	-1.1108e-10	-1.12696e-10	-1.03436e-10	-9.88884e-11	-1.0488e-10	-1.11116e-10	0.27537	-2.62e-11	-1.7e-11	4.63e-12	2.47e-11	4.32e-11	7.72e-11	1.02e-10	1.16e-10	1.42e-10	0.06825	-1.77315e-09	-1.79022e-09	-1.76408e-09	-1.77002e-09	-1.7531e-09	-1.76093e-09	-1.74864e-09	-1.77627e-09	-1.78096e-09	0.27537	-2.93179e-11	-1.23457e-11	5.06726e-15	1.54373e-11	4.1663e-11	6.63612e-11	7.56203e-11	1.08028e-10	1.32727e-10
0.276375	-2.1611e-11	-2.1606e-11	-1.53934e-12	2.62347e-11	2.77904e-11	5.24739e-11	8.64194e-11	1.11112e-10	1.55866e-10	0.0685	-9.56654e-11	-9.42677e-11	-9.87974e-11	-1.00386e-10	-1.17208e-10	-1.00359e-10	-1.09491e-10	-9.88338e-11	-1.12651e-10	0.276375	-4.17e-11	-1.85e-11	6.17e-12	4.94e-11	3.86e-11	7.72e-11	9.26e-11	1.14e-10	1.37e-10	0.0685	-1.76101e-09	-1.78712e-09	-1.77007e-09	-1.7548e-09	-1.74248e-09	-1.7655e-09	-1.75621e-09	-1.77472e-09	-1.78701e-09	0.276375	-2.77785e-11	-1.08002e-11	4.63041e-12	2.62313e-11	3.70399e-11	6.945e-11	8.02491e-11	1.09571e-10	1.37349e-10
0.27738	-2.62369e-11	-2.00627e-11	1.07979e-11	2.00644e-11	3.54921e-11	5.86459e-11	8.33407e-11	1.09575e-10	1.57413e-10	0.06875	-9.41767e-11	-1.0488e-10	-9.72815e-11	-1.01875e-10	-1.08121e-10	-1.04934e-10	-1.0645e-10	-1.03382e-10	-1.12651e-10	0.27738	-4.01e-11	-1.85e-11	1.23e-11	3.09e-11	4.48e-11	8.18e-11	8.8e-11	1.16e-10	1.42e-10	0.06875	-1.77007e-09	-1.78408e-09	-1.76401e-09	-1.75321e-09	-1.75001e-09	-1.76692e-09	-1.75627e-09	-1.76409e-09	-1.77483e-09	0.27738	-2.46982e-11	-1.54441e-12	1.07968e-11	2.46959e-11	3.55e-11	7.87024e-11	8.02536e-11	1.06485e-10	1.32722e-10
0.278385	-3.39517e-11	-1.8516e-11	9.2597e-12	1.852e-11	3.395e-11	6.7896e-11	8.95071e-11	1.14201e-10	1.52788e-10	0.069	-9.87519e-11	-1.04916e-10	-1.04898e-10	-1.06423e-10	-1.1413e-10	-1.08003e-10	-9.72906e-11	-1.04961e-10	-1.11144e-10	0.278385	-3.7e-11	-9.26e-12	1.7e-11	4.01e-11	4.94e-11	7.72e-11	8.33e-11	1.14e-10	1.51e-10	0.069	-1.76703e-09	-1.78861e-09	-1.76395e-09	-1.7577e-09	-1.74548e-09	-1.74565e-09	-1.75928e-09	-1.77316e-09	-1.77173e-09	0.278385	-3.70275e-11	4.62872e-12	7.8824e-15	3.24045e-11	4.62951e-11	7.40759e-11	8.79649e-11	9.87752e-11	1.28097e-10
0.27939	-4.01248e-11	-7.72261e-12	7.71529e-12	1.85166e-11	2.62364e-11	5.40251e-11	8.64261e-11	1.1266e-10	1.57415e-10	0.06925	-1.00277e-10	-1.0035e-10	-1.04952e-10	-1.00404e-10	-1.08112e-10	-1.06441e-10	-9.87792e-11	-1.09491e-10	-1.14212e-10	0.27939	-4.17e-11	-9.26e-12	1.39e-11	4.48e-11	5.4e-11	6.79e-11	9.26e-11	1.02e-10	1.34e-10	0.06925	-1.75936e-09	-1.78408e-09	-1.75937e-09	-1.74552e-09	-1.74542e-09	-1.7577e-09	-1.75166e-09	-1.77016e-09	-1.7747e-09	0.27939	-1.85318e-11	7.71248e-12	1.07985e-11	2.77819e-11	4.78407e-11	6.48247e-11	8.95093e-11	1.04939e-10	1.35804e-10
0.280395	-4.47518e-11	-1.38879e-11	3.09163e-12	1.08064e-11	2.00649e-11	6.78955e-11	8.95071e-11	1.12657e-10	1.6359e-10	0.0695	-9.56563e-11	-1.01884e-10	-1.0645e-10	-1.09491e-10	-1.15601e-10	-9.73451e-11	-1.01839e-10	-1.00377e-10	-1.18815e-10	0.280395	-4.17e-11	-2.82e-15	2.16e-11	4.32e-11	5.56e-11	6.79e-11	8.49e-11	1.02e-10	1.34e-10	0.0695	-1.7548e-09	-1.78702e-09	-1.7594e-09	-1.74391e-09	-1.73931e-09	-1.75319e-09	-1.75008e-09	-1.76856e-09	-1.76557e-09	0.280395	-3.39393e-11	5.63029e-15	9.26195e-12	3.0864e-11	4.63013e-11	7.40697e-11	8.79688e-11	1.00315e-10	1.3118e-10
0.2814	-4.01242e-11	-1.54306e-11	1.23423e-11	1.23446e-11	2.00638e-11	5.71077e-11	8.33396e-11	1.06489e-10	1.75928e-10	0.06975	-8.64876e-11	-1.08003e-10	-1.01848e-10	-1.04952e-10	-9.89248e-11	-1.07939e-10	-1.01848e-10	-1.01884e-10	-1.20349e-10	0.2814	-2.47e-11	1.54e-12	2.47e-11	4.63e-11	7.1e-11	6.64e-11	8.49e-11	9.88e-11	1.3e-10	0.06975	-1.76387e-09	-1.77328e-09	-1.76853e-09	-1.7423e-09	-1.7378e-09	-1.75162e-09	-1.74849e-09	-1.75938e-09	-1.76553e-09	0.2814	-1.39008e-11	7.71304e-12	1.3889e-11	2.93252e-11	5.24711e-11	6.17358e-11	9.1052e-11	1.0031e-10	1.2809e-10
0.282405	-3.2414e-11	-1.08019e-11	1.0803e-11	9.26195e-12	2.31498e-11	6.3269e-11	8.33379e-11	1.06491e-10	1.71307e-10	0.07	-8.79854e-11	-1.09509e-10	-9.572e-11	-1.01884e-10	-1.07948e-10	-1.03436e-10	-1.00359e-10	-1.08012e-10	-1.1728e-10	0.282405	-3.24e-11	3.09e-12	1.85e-11	4.32e-11	6.17e-11	5.71e-11	8.18e-11	9.57e-11	1.27e-10	0.07	-1.75629e-09	-1.76721e-09	-1.76559e-09	-1.73019e-09	-1.74689e-09	-1.74853e-09	-1.73936e-09	-1.75629e-09	-1.767e-09	0.282405	-2.46869e-11	6.17088e-12	1.69739e-11	3.54927e-11	5.71009e-11	6.17297e-11	8.95149e-11	9.10554e-11	1.17291e-10
0.28341	-3.85827e-11	-3.08938e-12	9.26308e-12	1.23468e-11	2.77825e-11	5.40206e-11	8.48772e-11	1.17283e-10	1.72848e-10	0.07025	-9.25697e-11	-1.00332e-10	-9.56836e-11	-1.03427e-10	-1.03509e-10	-1.04989e-10	-1.06414e-10	-1.11062e-10	-1.12714e-10	0.28341	-2.16e-11	9.26e-12	2.47e-11	3.24e-11	6.02e-11	6.17e-11	7.72e-11	8.95e-11	1.3e-10	0.07025	-1.7547e-09	-1.78536e-09	-1.77467e-09	-1.74687e-09	-1.7378e-09	-1.74403e-09	-1.74394e-09	-1.75931e-09	-1.75937e-09	0.28341	-2.00621e-11	-1.53765e-12	1.38929e-11	3.39511e-11	6.01852e-11	5.71043e-11	1.00306e-10	8.64301e-11	1.11119e-10
0.284415	-4.62929e-11	-3.08657e-12	1.69727e-11	1.69722e-11	4.16591e-11	6.01869e-11	7.71653e-11	1.11116e-10	1.74389e-10	0.0705	-9.26334e-11	-9.41494e-11	-9.572e-11	-1.09528e-10	-1.17126e-10	-1.14076e-10	-1.00368e-10	-1.04998e-10	-1.17244e-10	0.284415	-1.39e-11	6.18e-12	2.78e-11	3.55e-11	4.78e-11	5.4e-11	6.94e-11	8.95e-11	1.2e-10	0.0705	-1.75008e-09	-1.76721e-09	-1.7656e-09	-1.74243e-09	-1.73923e-09	-1.7592e-09	-1.75304e-09	-1.75627e-09	-1.75634e-09	0.284415	-1.38879e-11	6.16976e-12	2.00632e-11	2.9328e-11	5.55616e-11	6.01858e-11	8.95144e-11	9.87662e-11	1.12663e-10
0.28542	-3.85838e-11	-3.08375e-12	1.54328e-11	1.08081e-11	2.93286e-11	6.32684e-11	7.25377e-11	1.04946e-10	1.71302e-10	0.07075	-9.87247e-11	-8.9565e-11	-1.01793e-10	-1.07993e-10	-1.03455e-10	-1.02002e-10	-1.03364e-10	-1.07975e-10	-1.14221e-10	0.28542	-9.26e-12	1.85e-11	2.78e-11	3.09e-11	5.71e-11	4.63e-11	6.48e-11	8.49e-11	1.25e-10	0.07075	-1.74547e-09	-1.77468e-09	-1.77016e-09	-1.74851e-09	-1.73313e-09	-1.75017e-09	-1.74091e-09	-1.75624e-09	-1.76695e-09	0.28542	-3.08882e-12	4.62535e-12	2.77757e-11	4.01203e-11	6.0183e-11	5.71004e-11	8.95059e-11	1.00307e-10	1.23454e-10
0.286425	-3.54927e-11	4.62478e-12	1.38873e-11	1.85166e-11	3.39534e-11	4.93896e-11	7.71597e-11	1.06482e-10	1.62053e-10	0.071	-9.72633e-11	-9.41312e-11	-9.72723e-11	-1.00404e-10	-9.88156e-11	-1.14057e-10	-1.00323e-10	-1.01893e-10	-1.14185e-10	0.286425	-1.08e-11	1.7e-11	1.7e-11	3.55e-11	5.71e-11	5.56e-11	6.64e-11	1.03e-10	1.22e-10	0.071	-1.74386e-09	-1.76711e-09	-1.77775e-09	-1.75004e-09	-1.73003e-09	-1.75615e-09	-1.7424e-09	-1.7532e-09	-1.75943e-09	0.286425	1.54047e-12	-9.25182e-12	2.62319e-11	3.70371e-11	5.09323e-11	5.09295e-11	7.71704e-11	8.48896e-11	1.11125e-10
0.28743	-2.46954e-11	-1.54159e-12	6.17257e-12	1.85205e-11	4.1667e-11	4.78429e-11	6.94494e-11	9.56881e-11	1.7438e-10	0.07125	-1.01784e-10	-9.72087e-11	-1.00304e-10	-1.07966e-10	-1.01829e-10	-1.0192e-10	-9.8761e-11	-1.01829e-10	-1.11189e-10	0.28743	-7.72e-12	7.72e-12	2.16e-11	1.85e-11	3.86e-11	5.4e-11	6.48e-11	9.88e-11	1.25e-10	0.07125	-1.73475e-09	-1.76859e-09	-1.76717e-09	-1.74399e-09	-1.72849e-09	-1.744e-09	-1.75001e-09	-1.75468e-09	-1.76698e-09	0.28743	-1.54272e-12	-1.54554e-12	1.38941e-11	2.93258e-11	5.24683e-11	4.78424e-11	8.17901e-11	9.41392e-11	1.21915e-10
0.288435	-2.16105e-11	-3.08826e-12	-3.08713e-12	2.16054e-11	4.47547e-11	4.93794e-11	6.63629e-11	9.72269e-11	1.55877e-10	0.0715	-9.41403e-11	-9.72542e-11	-1.01811e-10	-1.04952e-10	-1.00323e-10	-1.0035e-10	-9.57291e-11	-9.72542e-11	-1.20285e-10	0.288435	-6.18e-12	1.55e-12	1.39e-11	2.16e-11	4.17e-11	5.25e-11	7.56e-11	9.88e-11	1.3e-10	0.0715	-1.74233e-09	-1.7686e-09	-1.77465e-09	-1.75154e-09	-1.72846e-09	-1.74694e-09	-1.74549e-09	-1.75012e-09	-1.76092e-09	0.288435	-3.08938e-12	-1.68909e-15	1.38929e-11	3.08612e-11	4.47597e-11	4.63002e-11	7.5622e-11	1.00315e-10	1.21917e-10
0.28944	-3.086e-11	-9.25857e-12	-1.38828e-11	2.31487e-11	4.62991e-11	3.55017e-11	6.79005e-11	9.87673e-11	1.52786e-10	0.07175	-8.64967e-11	-1.01775e-10	-9.56927e-11	-1.03427e-10	-1.00377e-10	-1.04943e-10	-1.0025e-10	-9.72542e-11	-1.14203e-10	0.28944	-1.08e-11	9.25e-12	1.39e-11	1.7e-11	4.78e-11	6.33e-11	6.95e-11	1.02e-10	1.27e-10	0.07175	-1.74387e-09	-1.76861e-09	-1.76097e-09	-1.74397e-09	-1.72543e-09	-1.74083e-09	-1.74695e-09	-1.7515e-09	-1.7609e-09	0.28944	-1.23418e-11	-3.08769e-12	2.31436e-11	2.00666e-11	4.93817e-11	4.93851e-11	7.25349e-11	1.1111e-10	1.15756e-10
0.290445	-2.46954e-11	-1.23435e-11	-6.17426e-12	2.31504e-11	4.93828e-11	3.85838e-11	5.86532e-11	9.26021e-11	1.51243e-10	0.072	-9.10628e-11	-9.26971e-11	-9.11174e-11	-1.06496e-10	-1.11016e-10	-1.09482e-10	-9.42131e-11	-1.01775e-10	-1.08103e-10	0.290445	-1.23e-11	3.09e-12	1.08e-11	2.31e-11	3.24e-11	6.79e-11	8.49e-11	1.1e-10	1.3e-10	0.072	-1.73933e-09	-1.77001e-09	-1.76088e-09	-1.74691e-09	-1.7285e-09	-1.73618e-09	-1.74082e-09	-1.73174e-09	-1.76244e-09	0.290445	-9.25857e-12	-9.26026e-12	1.69789e-11	2.00632e-11	4.47569e-11	5.24739e-11	7.09888e-11	1.04948e-10	1.37341e-10
0.29145	-2.6233e-11	-7.72036e-12	-1.54666e-12	2.62324e-11	4.62996e-11	4.62957e-11	7.2527e-11	1.00309e-10	1.52785e-10	0.07225	-9.71814e-11	-1.00241e-10	-9.71814e-11	-1.11098e-10	-1.04934e-10	-9.8852e-11	-1.00286e-10	-9.2688e-11	-1.14157e-10	0.29145	-1.85e-11	-6.17e-12	3.09e-12	2.16e-11	3.7e-11	6.48e-11	8.18e-11	1.14e-10	1.34e-10	0.07225	-1.74235e-09	-1.74869e-09	-1.75936e-09	-1.73468e-09	-1.73457e-09	-1.72854e-09	-1.73461e-09	-1.74079e-09	-1.76548e-09	0.29145	-3.09558e-12	-1.69711e-11	1.85177e-11	2.16037e-11	4.47552e-11	6.17263e-11	6.32808e-11	1.11115e-10	1.28099e-10
0.292455	-2.00627e-11	-1.38924e-11	-6.16807e-12	2.00689e-11	4.62951e-11	4.62985e-11	6.63623e-11	9.72252e-11	1.54327e-10	0.0725	-9.56563e-11	-9.57473e-11	-9.56745e-11	-1.12623e-10	-9.72906e-11	-1.01875e-10	-1.01866e-10	-9.87428e-11	-1.12687e-10	0.292455	-3.09e-11	-1.23e-11	-1.54e-12	1.7e-11	3.09e-11	5.87e-11	8.64e-11	1.25e-10	1.39e-10	0.0725	-1.74237e-09	-1.75312e-09	-1.76093e-09	-1.72703e-09	-1.72695e-09	-1.73154e-09	-1.72237e-09	-1.74388e-09	-1.76249e-09	0.292455	-2.15992e-11	-1.08047e-11	1.54317e-11	1.69801e-11	4.47507e-11	5.71071e-11	7.25281e-11	1.12656e-10	1.35807e-10
0.29346	-1.38952e-11	-2.77712e-11	3.07812e-12	3.08623e-11	3.70422e-11	4.63002e-11	6.32831e-11	8.95166e-11	1.51246e-10	0.07275	-8.96196e-11	-1.01802e-10	-9.26425e-11	-1.08021e-10	-1.00268e-10	-1.08003e-10	-1.0487e-10	-1.00295e-10	-1.15719e-10	0.29346	-1.7e-11	-1.85e-11	1.08e-11	2.16e-11	3.24e-11	7.87e-11	8.8e-11	1.19e-10	1.44e-10	0.07275	-1.74242e-09	-1.75013e-09	-1.77e-09	-1.73467e-09	-1.72231e-09	-1.73003e-09	-1.72079e-09	-1.74231e-09	-1.77012e-09	0.29346	-2.16048e-11	-9.25857e-12	9.26195e-12	2.31464e-11	3.24123e-11	6.78977e-11	6.48241e-11	1.04947e-10	1.37352e-10
0.294465	-2.31419e-11	-2.00661e-11	-1.07979e-11	3.2405e-11	3.70343e-11	5.09289e-11	8.33289e-11	9.87679e-11	1.605e-10	0.073	-1.0172e-10	-9.87701e-11	-9.71996e-11	-1.01929e-10	-9.5811e-11	-1.09491e-10	-9.57473e-11	-9.87519e-11	-1.14248e-10	0.294465	-2.47e-11	-1.85e-11	9.26e-12	2.62e-11	2.78e-11	8.33e-11	9.26e-11	1.16e-10	1.5e-10	0.073	-1.75144e-09	-1.75464e-09	-1.7548e-09	-1.74531e-09	-1.71925e-09	-1.72998e-09	-1.72382e-09	-1.73167e-09	-1.77315e-09	0.294465	-1.85211e-11	-4.63041e-12	9.25745e-12	2.16077e-11	2.9328e-11	6.01926e-11	7.40754e-11	1.0803e-10	1.37351e-10
0.29547	-1.23536e-11	-2.16048e-11	-1.07968e-11	2.31526e-11	2.47027e-11	5.70981e-11	8.02524e-11	1.01858e-10	1.65126e-10	0.07325	-9.11902e-11	-9.572e-11	-9.71814e-11	-1.07984e-10	-1.12432e-10	-9.72906e-11	-9.72633e-11	-9.41949e-11	-1.20358e-10	0.29547	-2.62e-11	-1.7e-11	1.55e-12	3.55e-11	4.32e-11	8.49e-11	9.57e-11	1.06e-10	1.47e-10	0.07325	-1.73023e-09	-1.7471e-09	-1.75472e-09	-1.7317e-09	-1.72232e-09	-1.72393e-09	-1.7223e-09	-1.73923e-09	-1.76255e-09	0.29547	-2.00632e-11	-1.54385e-12	3.08826e-12	2.46914e-11	4.16608e-11	6.48173e-11	7.71653e-11	1.11115e-10	1.32726e-10
0.296475	-2.16043e-11	-2.00599e-11	6.16581e-12	2.31476e-11	4.01141e-11	5.40172e-11	8.1794e-11	1.09571e-10	1.5588e-10	0.0735	-1.03245e-10	-9.87338e-11	-8.96105e-11	-1.06559e-10	-9.13085e-11	-9.57018e-11	-1.0487e-10	-9.87338e-11	-1.23417e-10	0.296475	-4.47e-11	-2.47e-11	1.39e-11	3.86e-11	4.01e-11	7.25e-11	9.26e-11	1.08e-10	1.51e-10	0.0735	-1.74377e-09	-1.75614e-09	-1.75621e-09	-1.74069e-09	-1.72841e-09	-1.73153e-09	-1.72071e-09	-1.7377e-09	-1.77161e-09	0.296475	-2.31509e-11	1.68909e-15	1.54216e-12	2.46925e-11	3.24135e-11	6.7905e-11	8.33339e-11	1.11114e-10	1.38891e-10
0.29748	-2.62358e-11	-1.08097e-11	3.09051e-12	1.85217e-11	2.46982e-11	5.70998e-11	8.33379e-11	1.11114e-10	1.68213e-10	0.07375	-8.96014e-11	-9.572e-11	-9.86519e-11	-1.17153e-10	-1.1246e-10	-9.71905e-11	-1.00332e-10	-9.72815e-11	-1.18787e-10	0.29748	-4.17e-11	-1.7e-11	9.26e-12	3.4e-11	5.25e-11	7.72e-11	9.26e-11	1.06e-10	1.48e-10	0.07375	-1.73469e-09	-1.7455e-09	-1.75012e-09	-1.72706e-09	-1.72389e-09	-1.73309e-09	-1.71004e-09	-1.73008e-09	-1.76707e-09	0.29748	-3.08612e-11	6.17088e-12	-3.07981e-12	2.46976e-11	3.54961e-11	7.25338e-11	8.02541e-11	1.04945e-10	1.32725e-10
0.298485	-3.08645e-11	-2.00593e-11	1.0799e-11	2.00599e-11	2.46937e-11	5.55616e-11	8.64233e-11	1.06489e-10	1.66675e-10	0.074	-9.09991e-11	-9.87065e-11	-8.804e-11	-1.05071e-10	-1.00368e-10	-9.26698e-11	-9.87701e-11	-1.04861e-10	-1.06605e-10	0.298485	-4.32e-11	-1.54e-11	1.39e-11	4.63e-11	4.78e-11	6.48e-11	9.11e-11	1.16e-10	1.54e-10	0.074	-1.73163e-09	-1.74243e-09	-1.75007e-09	-1.73454e-09	-1.72685e-09	-1.73165e-09	-1.71304e-09	-1.73153e-09	-1.76398e-09	0.298485	-2.62403e-11	6.16976e-12	1.07974e-11	3.85748e-11	4.01259e-11	7.5617e-11	8.64216e-11	1.03401e-10	1.32722e-10
0.29949	-3.24095e-11	-2.0061e-11	7.72261e-12	1.38901e-11	2.7778e-11	6.32712e-11	8.79677e-11	1.0957e-10	1.66676e-10	0.07425	-8.34283e-11	-9.11538e-11	-8.95286e-11	-1.14103e-10	-9.72542e-11	-1.00232e-10	-9.72269e-11	-9.87883e-11	-1.14185e-10	0.29949	-4.32e-11	-3.09e-12	1.54e-11	4.17e-11	5.4e-11	6.02e-11	9.72e-11	9.57e-11	1.42e-10	0.07425	-1.7392e-09	-1.74994e-09	-1.74703e-09	-1.7239e-09	-1.7162e-09	-1.74375e-09	-1.71462e-09	-1.72693e-09	-1.7624e-09	0.29949	-3.3946e-11	-3.08094e-12	9.26026e-12	3.24135e-11	4.62974e-11	6.79073e-11	8.64228e-11	1.03402e-10	1.32721e-10
0.300495	-3.5495e-11	-1.54328e-11	2.15975e-11	9.26252e-12	2.77774e-11	6.17325e-11	9.10526e-11	1.04947e-10	1.69764e-10	0.0745	-9.10264e-11	-1.00277e-10	-9.40857e-11	-1.06559e-10	-9.87883e-11	-9.41858e-11	-9.56745e-11	-9.57382e-11	-1.18751e-10	0.300495	-2.47e-11	-1.54e-12	2.16e-11	4.01e-11	6.33e-11	6.94e-11	8.49e-11	9.88e-11	1.45e-10	0.0745	-1.73317e-09	-1.73323e-09	-1.75013e-09	-1.72231e-09	-1.71772e-09	-1.7286e-09	-1.72072e-09	-1.72083e-09	-1.7563e-09	0.300495	-2.4697e-11	3.08488e-12	9.26083e-12	3.85781e-11	4.93817e-11	6.79056e-11	8.33396e-11	1.08026e-10	1.28091e-10
0.3015	-3.70399e-11	-1.08035e-11	1.23513e-11	1.23423e-11	2.31504e-11	6.32741e-11	9.10526e-11	1.1112e-10	1.8056e-10	0.07475	-9.4113e-11	-1.03364e-10	-8.9565e-11	-1.11071e-10	-1.034e-10	-9.56836e-11	-9.26516e-11	-1.01839e-10	-1.09664e-10	0.3015	-2.16e-11	2.25e-15	2.47e-11	4.17e-11	6.17e-11	6.33e-11	8.49e-11	1.08e-10	1.39e-10	0.07475	-1.73776e-09	-1.73622e-09	-1.76075e-09	-1.7223e-09	-1.72685e-09	-1.73454e-09	-1.71922e-09	-1.72693e-09	-1.75782e-09	0.3015	-2.77752e-11	4.62872e-12	1.2348e-11	3.39545e-11	4.32159e-11	7.09871e-11	8.64233e-11	1.03399e-10	1.20381e-10
0.302505	-4.16664e-11	-7.71585e-12	1.69727e-11	4.63323e-12	2.16088e-11	6.32712e-11	8.79672e-11	1.26537e-10	1.80562e-10	0.075	-9.26152e-11	-1.00268e-10	-9.4113e-11	-1.08039e-10	-1.08012e-10	-9.72996e-11	-9.87065e-11	-1.04943e-10	-1.15737e-10	0.302505	-2.78e-11	7.71e-12	2.93e-11	3.55e-11	5.71e-11	5.86e-11	8.02e-11	9.72e-11	1.27e-10	0.075	-1.74691e-09	-1.74381e-09	-1.74851e-09	-1.72229e-09	-1.72234e-09	-1.72238e-09	-1.71761e-09	-1.73158e-09	-1.76237e-09	0.302505	-2.00644e-11	3.08713e-12	2.00593e-11	3.54944e-11	4.78418e-11	6.32757e-11	8.79672e-11	9.72235e-11	1.26545e-10
0.30351	-4.01259e-11	-3.08657e-12	1.23468e-11	6.17144e-12	2.7778e-11	5.40177e-11	8.48783e-11	1.0958e-10	1.75937e-10	0.07525	-9.40675e-11	-8.96469e-11	-9.41039e-11	-1.06505e-10	-1.09482e-10	-1.10971e-10	-9.42131e-11	-1.08003e-10	-1.20312e-10	0.30351	-1.54e-11	7.72e-12	3.09e-11	3.86e-11	4.94e-11	4.94e-11	6.48e-11	8.8e-11	1.42e-10	0.07525	-1.7424e-09	-1.73471e-09	-1.73172e-09	-1.7193e-09	-1.72379e-09	-1.72234e-09	-1.70548e-09	-1.73921e-09	-1.75631e-09	0.30351	-1.69772e-11	3.08713e-12	1.85188e-11	3.39539e-11	5.24728e-11	5.86465e-11	8.95104e-11	8.18036e-11	1.21919e-10
0.304515	-4.01259e-11	1.53822e-12	9.26083e-12	3.09107e-12	3.08674e-11	5.24739e-11	7.56265e-11	1.11118e-10	1.79018e-10	0.0755	-8.34283e-11	-1.01766e-10	-8.80672e-11	-1.07993e-10	-9.5811e-11	-1.00395e-10	-1.01811e-10	-1.06532e-10	-1.14248e-10	0.304515	-2.01e-11	1.54e-11	1.85e-11	3.7e-11	4.94e-11	5.09e-11	6.94e-11	8.64e-11	1.19e-10	0.0755	-1.74387e-09	-1.73618e-09	-1.74077e-09	-1.72997e-09	-1.71619e-09	-1.72847e-09	-1.71908e-09	-1.73462e-09	-1.75925e-09	0.304515	-1.69711e-11	4.62872e-12	1.54357e-11	3.70354e-11	6.01824e-11	5.86442e-11	9.10549e-11	9.25925e-11	1.17293e-10
0.30552	-4.16687e-11	-7.71022e-12	9.25632e-12	1.23435e-11	3.85787e-11	5.7097e-11	8.17918e-11	1.17283e-10	1.72849e-10	0.07575	-8.79581e-11	-9.87701e-11	-9.86974e-11	-1.03473e-10	-1.03345e-10	-1.03373e-10	-1.01857e-10	-1.12587e-10	-1.15692e-10	0.30552	-1.7e-11	7.72e-12	1.85e-11	3.09e-11	4.94e-11	5.71e-11	6.17e-11	8.49e-11	1.33e-10	0.07575	-1.73933e-09	-1.73461e-09	-1.74085e-09	-1.73151e-09	-1.7192e-09	-1.73305e-09	-1.71004e-09	-1.72549e-09	-1.74708e-09	0.30552	-3.09389e-12	3.08826e-12	2.00627e-11	3.08679e-11	5.24767e-11	5.71009e-11	9.56763e-11	9.10543e-11	1.2346e-10
0.306525	-4.32063e-11	1.68909e-15	6.19332e-15	1.38901e-11	3.70439e-11	4.93879e-11	8.1794e-11	1.06492e-10	1.71308e-10	0.076	-9.10355e-11	-9.56745e-11	-9.7236e-11	-1.11071e-10	-1.01829e-10	-1.01866e-10	-1.01848e-10	-1.0655e-10	-1.08112e-10	0.306525	-1.85e-11	6.17e-12	2.47e-11	3.39e-11	5.25e-11	5.56e-11	7.41e-11	9.41e-11	1.23e-10	0.076	-1.74237e-09	-1.72553e-09	-1.74542e-09	-1.7239e-09	-1.71924e-09	-1.72838e-09	-1.71448e-09	-1.73303e-09	-1.74854e-09	0.306525	-9.25689e-12	6.16581e-12	2.4692e-11	3.08668e-11	5.86403e-11	5.40138e-11	8.02558e-11	9.10537e-11	1.21922e-10
0.30753	-2.93275e-11	1.23367e-11	7.70854e-12	1.69756e-11	4.938e-11	4.93856e-11	8.17884e-11	1.09571e-10	1.79016e-10	0.07625	-9.1081e-11	-9.11083e-11	-9.71814e-11	-1.11089e-10	-9.57473e-11	-1.01829e-10	-1.00359e-10	-1.11053e-10	-1.14203e-10	0.30753	-1.55e-12	9.26e-12	2.16e-11	1.85e-11	4.17e-11	5.71e-11	6.48e-11	1.02e-10	1.28e-10	0.07625	-1.74543e-09	-1.73915e-09	-1.74391e-09	-1.72535e-09	-1.7223e-09	-1.70713e-09	-1.70077e-09	-1.727e-09	-1.75007e-09	0.30753	-7.71698e-12	-1.07934e-11	2.7774e-11	3.39489e-11	5.24745e-11	4.78452e-11	7.87091e-11	9.10565e-11	1.26549e-10
0.308535	-2.93218e-11	-1.54159e-12	-6.16581e-12	1.85177e-11	4.78418e-11	5.09267e-11	6.63685e-11	1.08028e-10	1.74389e-10	0.0765	-9.56381e-11	-9.56563e-11	-8.95286e-11	-1.06505e-10	-1.00323e-10	-9.72723e-11	-1.06368e-10	-1.04952e-10	-1.20303e-10	0.308535	-6.17e-12	7.72e-12	1.7e-11	1.85e-11	4.32e-11	6.33e-11	7.41e-11	1.05e-10	1.3e-10	0.0765	-1.74394e-09	-1.73157e-09	-1.74236e-09	-1.71924e-09	-1.72533e-09	-1.72828e-09	-1.69916e-09	-1.73152e-09	-1.74851e-09	0.308535	-7.71923e-12	-1.55117e-12	1.69823e-11	2.77802e-11	5.40127e-11	5.0925e-11	8.17878e-11	9.87668e-11	1.31174e-10
0.30954	-2.77785e-11	-1.08002e-11	-2.25211e-15	1.54368e-11	4.63008e-11	4.78378e-11	7.09899e-11	1.00315e-10	1.65134e-10	0.07675	-9.2597e-11	-9.56381e-11	-8.49807e-11	-1.04971e-10	-1.06414e-10	-1.00268e-10	-9.27881e-11	-1.00377e-10	-1.14239e-10	0.30954	-7.72e-12	3.08e-12	2.31e-11	1.24e-11	3.7e-11	5.86e-11	7.41e-11	1.06e-10	1.28e-10	0.07675	-1.74697e-09	-1.72544e-09	-1.73932e-09	-1.71614e-09	-1.71772e-09	-1.71621e-09	-1.69761e-09	-1.72847e-09	-1.74242e-09	0.30954	-1.54289e-11	-1.38867e-11	2.31447e-11	2.46931e-11	4.93851e-11	4.47609e-11	6.79118e-11	9.72297e-11	1.21926e-10
0.310545	-2.46925e-11	-1.23468e-11	-6.19332e-15	2.31504e-11	5.09222e-11	3.39618e-11	7.25321e-11	9.72297e-11	1.63587e-10	0.077	-8.94922e-11	-8.80309e-11	-9.71177e-11	-1.08003e-10	-1.0035e-10	-9.57018e-11	-1.10971e-10	-1.06414e-10	-1.14212e-10	0.310545	-7.72e-12	-7.71e-12	1.08e-11	2.47e-11	3.24e-11	5.86e-11	7.1e-11	1.06e-10	1.31e-10	0.077	-1.74547e-09	-1.72691e-09	-1.7423e-09	-1.71461e-09	-1.71768e-09	-1.71767e-09	-1.69612e-09	-1.72386e-09	-1.74541e-09	0.310545	-1.23468e-11	-1.852e-11	1.69767e-11	2.31493e-11	4.47524e-11	5.40149e-11	7.40692e-11	1.03398e-10	1.31177e-10
0.31155	-2.1606e-11	-1.5434e-11	-1.69665e-11	3.39466e-11	3.85917e-11	4.62929e-11	6.79056e-11	1.01856e-10	1.58964e-10	0.07725	-8.33737e-11	-9.10355e-11	-9.10719e-11	-1.06468e-10	-1.00277e-10	-9.41585e-11	-1.0498e-10	-1.00395e-10	-1.15764e-10	0.31155	-1.39e-11	-6.18e-12	4.63e-12	1.54e-11	3.55e-11	7.1e-11	7.41e-11	1.02e-10	1.39e-10	0.07725	-1.74695e-09	-1.72384e-09	-1.7348e-09	-1.71607e-09	-1.71919e-09	-1.71918e-09	-1.70369e-09	-1.7208e-09	-1.7408e-09	0.31155	-1.08047e-11	-2.46863e-11	1.23485e-11	2.16082e-11	3.24157e-11	6.32729e-11	5.71111e-11	1.03402e-10	1.34265e-10
0.312555	-1.85222e-11	-2.1602e-11	-7.7198e-12	2.93224e-11	5.24621e-11	4.3217e-11	6.6364e-11	1.03401e-10	1.71298e-10	0.0775	-8.33464e-11	-9.10173e-11	-8.80127e-11	-1.01884e-10	-9.41949e-11	-9.57018e-11	-1.04943e-10	-1.07966e-10	-1.20385e-10	0.312555	-1.39e-11	-1.39e-11	9.25e-12	1.85e-11	3.09e-11	7.56e-11	8.64e-11	1.17e-10	1.47e-10	0.0775	-1.74084e-09	-1.71923e-09	-1.7514e-09	-1.70697e-09	-1.71608e-09	-1.71463e-09	-1.69613e-09	-1.72379e-09	-1.73172e-09	0.312555	-1.38901e-11	-1.38929e-11	1.38862e-11	2.6233e-11	3.8577e-11	6.79e-11	6.63606e-11	1.09571e-10	1.34268e-10
0.31356	-2.31487e-11	-1.69812e-11	-7.7136e-12	2.46959e-11	4.01288e-11	5.40099e-11	7.25338e-11	1.06485e-10	1.65132e-10	0.07775	-8.48806e-11	-8.49352e-11	-9.25879e-11	-1.01829e-10	-9.71905e-11	-1.00241e-10	-1.04943e-10	-1.0498e-10	-1.26458e-10	0.31356	-2.47e-11	-1.08e-11	-1.54e-12	2.31e-11	3.4e-11	6.17e-11	8.95e-11	1.11e-10	1.42e-10	0.07775	-1.73768e-09	-1.71618e-09	-1.73009e-09	-1.71444e-09	-1.70379e-09	-1.71767e-09	-1.69909e-09	-1.71776e-09	-1.74841e-09	0.31356	-1.85166e-11	-1.23451e-11	6.17595e-12	2.31493e-11	3.08685e-11	6.01909e-11	7.40782e-11	1.0957e-10	1.41976e-10
0.314565	-2.62341e-11	-2.62324e-11	-1.68909e-15	2.93224e-11	3.70388e-11	5.09312e-11	7.71636e-11	1.04948e-10	1.6205e-10	0.078	-8.6433e-11	-8.79945e-11	-9.56108e-11	-9.72996e-11	-9.4204e-11	-9.26516e-11	-1.04961e-10	-1.08003e-10	-1.17344e-10	0.314565	-3.24e-11	-7.72e-12	4.63e-12	2.62e-11	3.4e-11	8.02e-11	8.8e-11	1.16e-10	1.51e-10	0.078	-1.72545e-09	-1.72072e-09	-1.72088e-09	-1.69779e-09	-1.69316e-09	-1.72072e-09	-1.69152e-09	-1.72534e-09	-1.74394e-09	0.314565	-1.5439e-11	-7.71811e-12	6.17313e-12	2.00649e-11	3.08702e-11	6.0192e-11	8.333e-11	1.0032e-10	1.34274e-10
0.31557	-2.46954e-11	-2.62336e-11	3.08544e-12	3.39472e-11	3.39534e-11	5.55537e-11	8.02507e-11	1.15742e-10	1.72844e-10	0.07825	-8.94558e-11	-9.56654e-11	-8.64967e-11	-1.04934e-10	-1.01848e-10	-9.41858e-11	-1.07966e-10	-1.06514e-10	-1.17271e-10	0.31557	-2.62e-11	-2.62e-11	3.09e-12	3.09e-11	3.55e-11	7.41e-11	9.11e-11	1.13e-10	1.6e-10	0.07825	-1.72388e-09	-1.71926e-09	-1.73156e-09	-1.71133e-09	-1.71289e-09	-1.71621e-09	-1.69755e-09	-1.72376e-09	-1.74387e-09	0.31557	-2.93179e-11	-7.71754e-12	6.17257e-12	2.31504e-11	4.32024e-11	7.0986e-11	7.25405e-11	1.0803e-10	1.48148e-10
0.316575	-3.08623e-11	-2.00644e-11	3.08995e-12	2.46959e-11	3.39528e-11	4.78485e-11	8.33396e-11	1.15746e-10	1.74393e-10	0.0785	-8.3401e-11	-1.00259e-10	-8.95013e-11	-1.11053e-10	-1.07993e-10	-1.03309e-10	-1.00395e-10	-1.09519e-10	-1.14185e-10	0.316575	-3.55e-11	-2.62e-11	6.17e-12	3.24e-11	4.48e-11	7.87e-11	9.57e-11	1.22e-10	1.47e-10	0.0785	-1.72695e-09	-1.72531e-09	-1.74071e-09	-1.69621e-09	-1.70689e-09	-1.72529e-09	-1.69304e-09	-1.70697e-09	-1.7378e-09	0.316575	-3.08657e-11	-1.07979e-11	4.62816e-12	2.9319e-11	2.9332e-11	6.79073e-11	7.8708e-11	1.15741e-10	1.41983e-10
0.31758	-2.77842e-11	-1.852e-11	1.2344e-11	2.46908e-11	3.54882e-11	5.86437e-11	9.25936e-11	1.15747e-10	1.82104e-10	0.07875	-8.79126e-11	-9.57291e-11	-9.10719e-11	-1.06468e-10	-1.07993e-10	-9.72451e-11	-1.06423e-10	-1.03455e-10	-1.08139e-10	0.31758	-4.17e-11	-2.78e-11	4.63e-12	4.78e-11	4.78e-11	8.02e-11	9.57e-11	1.14e-10	1.45e-10	0.07875	-1.73305e-09	-1.71774e-09	-1.73166e-09	-1.70372e-09	-1.70389e-09	-1.7177e-09	-1.69757e-09	-1.70698e-09	-1.74228e-09	0.31758	-3.2409e-11	-5.63029e-16	-1.54103e-12	2.62369e-11	4.1663e-11	7.25343e-11	8.64205e-11	1.09578e-10	1.37355e-10
0.318585	-3.85759e-11	-1.85188e-11	1.54289e-11	2.00627e-11	1.6984e-11	6.63578e-11	9.25959e-11	1.17288e-10	1.79028e-10	0.079	-8.34283e-11	-9.87883e-11	-9.56836e-11	-9.88338e-11	-1.01911e-10	-9.41767e-11	-1.0192e-10	-1.06496e-10	-1.20267e-10	0.318585	-3.55e-11	-1.39e-11	1.7e-11	4.32e-11	5.56e-11	6.48e-11	9.26e-11	1.16e-10	1.54e-10	0.079	-1.73008e-09	-1.72078e-09	-1.73777e-09	-1.70068e-09	-1.71753e-09	-1.7146e-09	-1.69457e-09	-1.72523e-09	-1.73164e-09	0.318585	-3.39505e-11	9.25745e-12	-1.53878e-12	2.62386e-11	3.85838e-11	7.71602e-11	8.48795e-11	1.17281e-10	1.40434e-10
0.31959	-3.2414e-11	-1.69733e-11	7.72148e-12	1.54328e-11	2.00649e-11	6.48157e-11	8.95116e-11	1.15751e-10	1.94444e-10	0.07925	-9.40493e-11	-1.04852e-10	-1.00222e-10	-1.01829e-10	-1.04943e-10	-9.72451e-11	-1.08021e-10	-1.11107e-10	-1.14258e-10	0.31959	-3.7e-11	-1.08e-11	1.7e-11	3.7e-11	6.33e-11	6.17e-11	9.41e-11	1.03e-10	1.45e-10	0.07925	-1.73612e-09	-1.72688e-09	-1.74997e-09	-1.69457e-09	-1.70698e-09	-1.71302e-09	-1.69917e-09	-1.71614e-09	-1.73314e-09	0.31959	-3.08662e-11	1.23418e-11	1.07979e-11	3.39539e-11	4.01293e-11	7.09944e-11	8.02564e-11	1.0032e-10	1.31182e-10
0.320595	-4.01231e-11	-7.72205e-12	1.38856e-11	1.0803e-11	2.93184e-11	5.7106e-11	8.95127e-11	1.26542e-10	1.82114e-10	0.0795	-8.95104e-11	-9.57564e-11	-8.96287e-11	-1.00323e-10	-1.0803e-10	-1.03309e-10	-1.1256e-10	-1.14157e-10	-1.17253e-10	0.320595	-3.55e-11	-3.09e-12	2.01e-11	4.01e-11	5.25e-11	6.48e-11	8.8e-11	1.05e-10	1.4e-10	0.0795	-1.73006e-09	-1.72379e-09	-1.74394e-09	-1.69605e-09	-1.71449e-09	-1.70685e-09	-1.70674e-09	-1.70851e-09	-1.74075e-09	0.320595	-2.93213e-11	3.09276e-12	9.26083e-12	4.62918e-11	5.2466e-11	7.40708e-11	9.10481e-11	1.01856e-10	1.29639e-10
0.3216	-4.16692e-11	-1.38856e-11	9.26026e-12	6.17595e-12	2.77808e-11	6.17268e-11	9.56841e-11	1.17298e-10	1.86734e-10	0.07975	-8.4917e-11	-9.8761e-11	-9.87519e-11	-1.00286e-10	-1.11071e-10	-9.41949e-11	-1.00395e-10	-1.09555e-10	-1.1423e-10	0.3216	-2.01e-11	-5.63e-16	1.54e-11	4.32e-11	5.86e-11	6.17e-11	8.33e-11	1.08e-10	1.36e-10	0.07975	-1.72998e-09	-1.71154e-09	-1.74231e-09	-1.6945e-09	-1.70538e-09	-1.69768e-09	-1.69156e-09	-1.71766e-09	-1.73618e-09	0.3216	-2.4692e-11	1.07962e-11	1.08075e-11	4.01254e-11	4.93862e-11	5.86498e-11	8.64244e-11	1.00311e-10	1.37346e-10
0.322605	-4.47541e-11	-9.26026e-12	6.17539e-12	9.25689e-12	3.0864e-11	5.402e-11	1.03388e-10	1.3117e-10	1.83654e-10	0.08	-8.64239e-11	-1.00286e-10	-1.04925e-10	-9.57109e-11	-1.06477e-10	-9.41767e-11	-1.01902e-10	-1.01948e-10	-1.15692e-10	0.322605	-3.24e-11	1.55e-12	2.47e-11	3.86e-11	5.4e-11	5.56e-11	7.87e-11	9.11e-11	1.4e-10	0.08	-1.72389e-09	-1.70536e-09	-1.73156e-09	-1.68842e-09	-1.70527e-09	-1.69912e-09	-1.696e-09	-1.72383e-09	-1.73008e-09	0.322605	-1.85183e-11	4.50423e-15	2.46852e-11	3.39573e-11	4.93862e-11	5.71054e-11	8.33413e-11	9.2601e-11	1.28096e-10
0.32361	-4.47547e-11	-6.17201e-12	9.26026e-12	4.63435e-12	2.93224e-11	6.01841e-11	7.8717e-11	1.20382e-10	1.88278e-10	0.08025	-8.79399e-11	-9.72996e-11	-1.07948e-10	-9.56836e-11	-1.00377e-10	-1.00241e-10	-1.11007e-10	-1.09546e-10	-1.08139e-10	0.32361	-1.54e-11	9.26e-12	2.01e-11	4.17e-11	5.4e-11	5.4e-11	7.41e-11	9.26e-11	1.39e-10	0.08025	-1.72535e-09	-1.70377e-09	-1.72083e-09	-1.69451e-09	-1.69618e-09	-1.69455e-09	-1.68847e-09	-1.72688e-09	-1.73309e-09	0.32361	-9.26533e-12	1.54497e-12	1.8525e-11	4.16619e-11	5.24728e-11	6.6355e-11	9.10475e-11	9.56825e-11	1.28089e-10
0.324615	-4.32097e-11	-4.50423e-15	1.38867e-11	1.23401e-11	2.77842e-11	5.55593e-11	8.02513e-11	1.25e-10	1.852e-10	0.0805	-8.4917e-11	-1.06423e-10	-9.72451e-11	-9.57018e-11	-1.04916e-10	-9.42131e-11	-1.01975e-10	-1.12605e-10	-1.1876e-10	0.324615	-1.7e-11	7.72e-12	2.01e-11	3.4e-11	5.56e-11	5.25e-11	7.41e-11	9.11e-11	1.27e-10	0.0805	-1.72081e-09	-1.69915e-09	-1.7223e-09	-1.69756e-09	-1.70522e-09	-1.69453e-09	-1.70062e-09	-1.72076e-09	-1.73303e-09	0.324615	-1.54261e-11	7.71191e-12	2.77735e-11	3.08719e-11	5.86397e-11	5.8647e-11	8.17974e-11	9.56836e-11	1.18837e-10
0.32562	-3.54966e-11	-6.17032e-12	1.08013e-11	3.09389e-12	4.01197e-11	5.40155e-11	8.33317e-11	1.12662e-10	1.99072e-10	0.08075	-8.79581e-11	-1.04889e-10	-8.95741e-11	-9.87428e-11	-1.04907e-10	-1.00241e-10	-1.12587e-10	-1.06559e-10	-1.1729e-10	0.32562	-9.26e-12	1.23e-11	2.16e-11	3.24e-11	5.09e-11	5.56e-11	7.25e-11	9.26e-11	1.3e-10	0.08075	-1.72381e-09	-1.69302e-09	-1.72382e-09	-1.69145e-09	-1.6961e-09	-1.69608e-09	-1.69914e-09	-1.71467e-09	-1.71932e-09	0.32562	-3.09558e-12	1.54385e-12	2.16116e-11	3.70354e-11	5.09329e-11	5.70981e-11	8.17918e-11	9.56802e-11	1.20377e-10
0.326625	-3.08679e-11	-4.63154e-12	3.09051e-12	1.38873e-11	3.70444e-11	5.40127e-11	7.09961e-11	1.06489e-10	1.80571e-10	0.081	-8.95377e-11	-9.42768e-11	-9.26698e-11	-9.72723e-11	-9.88156e-11	-9.41949e-11	-1.11071e-10	-1.12523e-10	-1.15783e-10	0.326625	-3.38e-15	1.23e-11	2.47e-11	2.93e-11	4.17e-11	5.4e-11	7.25e-11	9.57e-11	1.33e-10	0.081	-1.72082e-09	-1.69305e-09	-1.72082e-09	-1.68688e-09	-1.6915e-09	-1.69912e-09	-1.69455e-09	-1.7223e-09	-1.72229e-09	0.326625	-1.54278e-11	-3.08206e-12	3.08612e-11	3.39545e-11	5.55554e-11	4.63036e-11	7.56231e-11	8.64351e-11	1.25005e-10
0.32763	-3.24056e-11	-7.71473e-12	6.17032e-12	1.85177e-11	4.93772e-11	4.78435e-11	7.25332e-11	1.06487e-10	1.82106e-10	0.08125	-9.56836e-11	-1.06386e-10	-1.07902e-10	-1.03336e-10	-1.00313e-10	-9.72269e-11	-1.01939e-10	-9.58201e-11	-1.20322e-10	0.32763	-2.25e-15	9.26e-12	2.16e-11	2.47e-11	4.48e-11	5.25e-11	6.64e-11	1.05e-10	1.36e-10	0.08125	-1.72844e-09	-1.70525e-09	-1.7284e-09	-1.69447e-09	-1.69755e-09	-1.69611e-09	-1.69458e-09	-1.72833e-09	-1.72236e-09	0.32763	-1.38867e-11	4.62253e-12	2.77785e-11	3.70354e-11	5.24716e-11	4.93823e-11	7.56215e-11	1.08017e-10	1.28091e-10
0.328635	-2.4697e-11	-6.17482e-12	1.54047e-12	1.85183e-11	4.01288e-11	4.62996e-11	7.0991e-11	1.06487e-10	1.80561e-10	0.0815	-1.01757e-10	-1.01848e-10	-1.0192e-10	-9.87974e-11	-1.01839e-10	-1.00313e-10	-1.06459e-10	-1.01802e-10	-1.15728e-10	0.328635	-6.17e-12	1.39e-11	1.7e-11	2.16e-11	4.17e-11	5.25e-11	7.41e-11	1e-10	1.33e-10	0.0815	-1.73e-09	-1.70373e-09	-1.72388e-09	-1.69301e-09	-1.69303e-09	-1.70068e-09	-1.70365e-09	-1.71009e-09	-1.73152e-09	0.328635	-4.63548e-12	-7.71698e-12	2.31526e-11	3.08668e-11	4.93885e-11	4.47575e-11	7.71614e-11	9.56881e-11	1.28093e-10
0.32964	-2.9319e-11	-9.26026e-12	-1.07979e-11	1.54362e-11	4.01299e-11	4.78378e-11	6.94517e-11	1.08026e-10	1.71309e-10	0.08175	-9.11356e-11	-9.57382e-11	-1.06423e-10	-9.8761e-11	-1.00332e-10	-1.03373e-10	-1.06487e-10	-9.88338e-11	-1.08057e-10	0.32964	-1.23e-11	-1.54e-12	1.08e-11	1.7e-11	3.86e-11	6.02e-11	7.41e-11	1.03e-10	1.34e-10	0.08175	-1.72843e-09	-1.69305e-09	-1.72534e-09	-1.696e-09	-1.69603e-09	-1.70223e-09	-1.69e-09	-1.71301e-09	-1.73303e-09	0.32964	-1.08002e-11	-2.15981e-11	2.77735e-11	2.77757e-11	5.55526e-11	4.63041e-11	7.0991e-11	9.5687e-11	1.29638e-10
0.330645	-2.46931e-11	-1.38879e-11	-9.25801e-12	2.16043e-11	5.24638e-11	3.85849e-11	7.87013e-11	1.00316e-10	1.74392e-10	0.082	-9.40857e-11	-9.87155e-11	-1.00368e-10	-9.72633e-11	-1.01866e-10	-1.01848e-10	-1.06523e-10	-1.06414e-10	-1.04943e-10	0.330645	-9.26e-12	-6.17e-12	1.23e-11	2.31e-11	3.24e-11	7.41e-11	7.56e-11	1.08e-10	1.39e-10	0.082	-1.71925e-09	-1.69297e-09	-1.71779e-09	-1.68842e-09	-1.69294e-09	-1.7022e-09	-1.69297e-09	-1.70999e-09	-1.7208e-09	0.330645	-9.26195e-12	-1.38901e-11	1.69789e-11	1.5439e-11	4.62985e-11	6.3269e-11	6.48202e-11	1.04942e-10	1.3735e-10
0.33165	-2.1611e-11	-1.38896e-11	-3.09163e-12	2.31476e-11	4.32159e-11	3.70394e-11	7.09944e-11	1.00316e-10	1.7902e-10	0.08225	-8.80218e-11	-9.26789e-11	-1.03391e-10	-1.01775e-10	-1.0487e-10	-9.88065e-11	-1.12614e-10	-1.01884e-10	-1.01848e-10	0.33165	-9.26e-12	-7.72e-12	3.08e-12	1.54e-11	3.86e-11	6.64e-11	8.18e-11	1.2e-10	1.45e-10	0.08225	-1.7162e-09	-1.69147e-09	-1.72993e-09	-1.69146e-09	-1.68235e-09	-1.69454e-09	-1.6945e-09	-1.71141e-09	-1.71464e-09	0.33165	-1.38896e-11	-7.72036e-12	1.3889e-11	2.0061e-11	3.70422e-11	6.48168e-11	6.4819e-11	1.11118e-10	1.38892e-10
0.332655	-3.24005e-11	-1.38901e-11	-1.0799e-11	2.00672e-11	4.47535e-11	3.70427e-11	7.25388e-11	1.06483e-10	1.80564e-10	0.0825	-9.10446e-11	-1.0025e-10	-1.04934e-10	-9.26971e-11	-9.57746e-11	-1.01784e-10	-1.11144e-10	-1.01857e-10	-9.72815e-11	0.332655	-9.27e-12	-1.23e-11	-1.23e-11	2.31e-11	2.62e-11	7.56e-11	8.18e-11	1.13e-10	1.45e-10	0.0825	-1.72535e-09	-1.69448e-09	-1.72683e-09	-1.69757e-09	-1.70053e-09	-1.68996e-09	-1.69143e-09	-1.69771e-09	-1.71772e-09	0.332655	-1.85188e-11	-1.23457e-11	9.26026e-12	2.00638e-11	3.70411e-11	6.32752e-11	6.79017e-11	1.20372e-10	1.29644e-10
0.33366	-2.00689e-11	-1.54362e-11	-7.71642e-12	2.9319e-11	4.16692e-11	4.78373e-11	8.6416e-11	1.03406e-10	1.82106e-10	0.08275	-9.25151e-11	-9.72451e-11	-1.04898e-10	-1.00259e-10	-1.01802e-10	-9.2688e-11	-1.14103e-10	-1.01902e-10	-1.0192e-10	0.33366	-2.62e-11	-1.7e-11	7.71e-12	2.78e-11	3.09e-11	6.64e-11	8.95e-11	1.1e-10	1.54e-10	0.08275	-1.72687e-09	-1.68992e-09	-1.70704e-09	-1.69602e-09	-1.6915e-09	-1.69607e-09	-1.68685e-09	-1.70074e-09	-1.72832e-09	0.33366	-2.16054e-11	-1.54323e-11	6.17257e-12	2.31476e-11	4.32057e-11	6.3278e-11	6.32848e-11	1.17289e-10	1.41979e-10
0.334665	-2.46937e-11	-2.62296e-11	-4.6276e-12	2.93218e-11	4.01248e-11	4.63024e-11	7.87131e-11	1.15744e-10	1.80563e-10	0.083	-8.03781e-11	-9.7236e-11	-9.72542e-11	-9.88065e-11	-9.87974e-11	-9.87883e-11	-1.0045e-10	-1.09537e-10	-1.17117e-10	0.334665	-2.62e-11	-1.85e-11	1.55e-12	2.62e-11	4.32e-11	7.1e-11	9.11e-11	1.14e-10	1.53e-10	0.083	-1.71763e-09	-1.68981e-09	-1.71455e-09	-1.68682e-09	-1.69299e-09	-1.70226e-09	-1.6899e-09	-1.71136e-09	-1.71318e-09	0.334665	-2.31493e-11	-1.69722e-11	1.54497e-12	2.16048e-11	3.24123e-11	7.25287e-11	8.64126e-11	1.12664e-10	1.4661e-10
0.33567	-3.24039e-11	-2.00649e-11	4.6276e-12	2.77785e-11	3.7036e-11	5.55531e-11	8.6416e-11	1.21917e-10	1.75937e-10	0.08325	-8.94558e-11	-9.87792e-11	-9.42222e-11	-1.03345e-10	-1.00286e-10	-1.07893e-10	-1.09573e-10	-1.11135e-10	-1.03564e-10	0.33567	-2.78e-11	-2.16e-11	6.17e-12	3.09e-11	4.78e-11	6.48e-11	8.8e-11	1.19e-10	1.45e-10	0.08325	-1.70083e-09	-1.67616e-09	-1.71618e-09	-1.67919e-09	-1.69607e-09	-1.71136e-09	-1.69447e-09	-1.69926e-09	-1.7207e-09	0.33567	-2.46942e-11	-7.71473e-12	1.54328e-12	1.69795e-11	3.08668e-11	6.6364e-11	7.87108e-11	1.18827e-10	1.45068e-10
0.336675	-2.62437e-11	-2.00621e-11	7.71698e-12	2.46914e-11	2.62409e-11	5.09345e-11	7.25461e-11	1.20377e-10	1.79025e-10	0.0835	-8.94831e-11	-1.01757e-10	-1.04861e-10	-9.87428e-11	-9.7336e-11	-9.42586e-11	-1.18733e-10	-1.1571e-10	-1.17108e-10	0.336675	-3.55e-11	-2.47e-11	9.26e-12	3.7e-11	4.48e-11	7.56e-11	9.26e-11	1.2e-10	1.54e-10	0.0835	-1.70683e-09	-1.68821e-09	-1.72524e-09	-1.68822e-09	-1.69919e-09	-1.69767e-09	-1.68992e-09	-1.70375e-09	-1.7177e-09	0.336675	-3.08645e-11	6.16694e-12	1.54385e-12	2.1606e-11	3.24129e-11	6.79056e-11	8.02524e-11	1.08033e-10	1.41984e-10
0.33768	-4.16647e-11	-1.85205e-11	1.23446e-11	1.85188e-11	2.93207e-11	6.32696e-11	9.10464e-11	1.21921e-10	1.94446e-10	0.08375	-8.49898e-11	-8.814e-11	-1.01939e-10	-8.96378e-11	-1.12505e-10	-1.00268e-10	-1.11162e-10	-1.14203e-10	-1.00459e-10	0.33768	-3.7e-11	-2.16e-11	4.63e-12	3.4e-11	5.09e-11	8.02e-11	8.95e-11	1.11e-10	1.51e-10	0.08375	-1.70537e-09	-1.67608e-09	-1.70846e-09	-1.67615e-09	-1.70831e-09	-1.69307e-09	-1.68984e-09	-1.7022e-09	-1.71921e-09	0.33768	-3.39489e-11	3.08544e-12	3.08938e-12	2.62353e-11	4.47502e-11	7.25304e-11	8.64199e-11	1.06491e-10	1.45066e-10
0.338685	-4.6294e-11	-2.00587e-11	1.23468e-11	1.08052e-11	2.77769e-11	6.17302e-11	8.95082e-11	1.28087e-10	1.89828e-10	0.084	-9.86428e-11	-1.03245e-10	-1.12541e-10	-1.01748e-10	-1.01911e-10	-9.88247e-11	-1.1108e-10	-1.12632e-10	-1.07984e-10	0.338685	-4.17e-11	-1.08e-11	9.26e-12	5.25e-11	5.86e-11	6.17e-11	9.57e-11	1.11e-10	1.45e-10	0.084	-1.71143e-09	-1.67609e-09	-1.69922e-09	-1.68823e-09	-1.70073e-09	-1.70366e-09	-1.68076e-09	-1.69304e-09	-1.71916e-09	0.338685	-2.77797e-11	-3.07981e-12	1.23412e-11	2.93241e-11	4.32131e-11	6.63702e-11	8.1798e-11	1.15738e-10	1.40439e-10
0.33969	-3.85843e-11	-1.08081e-11	1.38884e-11	9.26533e-12	2.00655e-11	5.71054e-11	8.17974e-11	1.20382e-10	1.95996e-10	0.08425	-9.11174e-11	-9.26698e-11	-1.03482e-10	-9.57109e-11	-1.00386e-10	-1.06414e-10	-1.0498e-10	-1.06514e-10	-1.08048e-10	0.33969	-3.09e-11	-9.26e-12	2.31e-11	4.32e-11	5.4e-11	6.48e-11	9.11e-11	1.11e-10	1.42e-10	0.08425	-1.70536e-09	-1.68977e-09	-1.70072e-09	-1.68072e-09	-1.69919e-09	-1.69305e-09	-1.69287e-09	-1.69297e-09	-1.70999e-09	0.33969	-2.31515e-11	9.2552e-12	7.7198e-12	3.70326e-11	4.47558e-11	8.48665e-11	8.79672e-11	1.03403e-10	1.37354e-10
0.340695	-3.70439e-11	-1.54306e-11	1.23435e-11	2.31386e-11	2.00638e-11	6.32724e-11	8.33367e-11	1.2963e-10	1.99079e-10	0.0845	-9.41494e-11	-9.41767e-11	-1.08003e-10	-9.41676e-11	-1.10962e-10	-1.01911e-10	-1.04952e-10	-1.04971e-10	-1.11016e-10	0.340695	-3.55e-11	-1.13e-15	1.85e-11	5.09e-11	6.33e-11	6.48e-11	8.49e-11	1e-10	1.48e-10	0.0845	-1.70373e-09	-1.6823e-09	-1.7053e-09	-1.68668e-09	-1.70369e-09	-1.6945e-09	-1.68687e-09	-1.69144e-09	-1.70686e-09	0.340695	-2.46903e-11	9.2597e-12	1.23474e-11	2.77859e-11	4.78435e-11	6.48286e-11	9.41358e-11	9.87713e-11	1.38894e-10
0.3417	-4.93817e-11	-1.38873e-11	3.09445e-12	7.72205e-12	2.31526e-11	6.32752e-11	8.33379e-11	1.21921e-10	1.89831e-10	0.08475	-9.87155e-11	-1.01793e-10	-1.08048e-10	-9.7236e-11	-9.58292e-11	-1.0645e-10	-1.06487e-10	-1.08066e-10	-9.73542e-11	0.3417	-2.47e-11	6.17e-12	2.78e-11	4.94e-11	5.56e-11	6.33e-11	8.49e-11	1.02e-10	1.4e-10	0.08475	-1.69305e-09	-1.69439e-09	-1.70528e-09	-1.67147e-09	-1.69305e-09	-1.69146e-09	-1.69141e-09	-1.68993e-09	-1.70231e-09	0.3417	-2.00649e-11	9.25801e-12	2.00576e-11	3.70366e-11	5.55537e-11	7.4072e-11	8.797e-11	9.72257e-11	1.35808e-10
0.342705	-5.24649e-11	-6.17651e-12	1.54266e-11	7.71585e-12	3.54882e-11	6.48151e-11	8.488e-11	1.18833e-10	1.99081e-10	0.085	-9.41767e-11	-9.87701e-11	-1.11035e-10	-1.01802e-10	-1.0488e-10	-1.04961e-10	-1.08048e-10	-1.17153e-10	-1.0487e-10	0.342705	-1.7e-11	-1.53e-12	2.93e-11	3.24e-11	5.86e-11	6.02e-11	8.49e-11	8.95e-11	1.36e-10	0.085	-1.69302e-09	-1.68383e-09	-1.69768e-09	-1.67139e-09	-1.69297e-09	-1.69142e-09	-1.69144e-09	-1.69447e-09	-1.70987e-09	0.342705	-2.16043e-11	4.63267e-12	1.38918e-11	4.01209e-11	5.09323e-11	6.79045e-11	8.95104e-11	9.26015e-11	1.29639e-10
0.34371	-3.70427e-11	-7.71473e-12	1.08024e-11	6.17482e-12	2.77836e-11	5.86487e-11	8.48789e-11	1.17291e-10	2.02166e-10	0.08525	-9.56836e-11	-9.57382e-11	-1.00441e-10	-9.72451e-11	-1.034e-10	-1.06514e-10	-1.12623e-10	-1.03518e-10	-1.00395e-10	0.34371	-1.39e-11	1.39e-11	2.93e-11	3.55e-11	5.4e-11	6.02e-11	7.87e-11	9.11e-11	1.45e-10	0.08525	-1.69913e-09	-1.69135e-09	-1.70222e-09	-1.6744e-09	-1.69148e-09	-1.68838e-09	-1.69146e-09	-1.68994e-09	-1.70229e-09	0.34371	-1.852e-11	7.71191e-12	1.38907e-11	3.08696e-11	5.70998e-11	6.17336e-11	9.1052e-11	1.0031e-10	1.31175e-10
0.344715	-3.24129e-11	-4.63154e-12	4.63492e-12	9.2597e-12	3.24106e-11	6.32724e-11	8.02536e-11	1.20379e-10	1.94455e-10	0.0855	-9.71905e-11	-1.01848e-10	-1.11025e-10	-9.57109e-11	-1.01902e-10	-1.12632e-10	-1.11107e-10	-1.09528e-10	-1.09455e-10	0.344715	-2.16e-11	6.18e-12	2.32e-11	3.09e-11	6.02e-11	4.94e-11	6.48e-11	9.88e-11	1.37e-10	0.0855	-1.7007e-09	-1.6838e-09	-1.70379e-09	-1.66677e-09	-1.69602e-09	-1.68987e-09	-1.69451e-09	-1.69296e-09	-1.70231e-09	0.344715	-1.69733e-11	-1.53822e-12	1.6975e-11	3.24073e-11	5.86453e-11	6.17285e-11	8.79683e-11	9.87679e-11	1.21922e-10
0.34572	-3.85798e-11	-6.17313e-12	1.23384e-11	1.23463e-11	4.16636e-11	6.17257e-11	8.33322e-11	1.31167e-10	1.91366e-10	0.08575	-9.26698e-11	-1.06423e-10	-1.06505e-10	-9.87701e-11	-1.07939e-10	-1.14121e-10	-1.08039e-10	-1.08048e-10	-9.87974e-11	0.34572	-7.72e-12	6.18e-12	3.39e-11	3.39e-11	5.09e-11	5.71e-11	6.02e-11	9.88e-11	1.22e-10	0.08575	-1.70225e-09	-1.68983e-09	-1.70523e-09	-1.66372e-09	-1.69306e-09	-1.68684e-09	-1.69445e-09	-1.693e-09	-1.71296e-09	0.34572	-7.72205e-12	3.08263e-12	1.69784e-11	2.93241e-11	6.17274e-11	5.40161e-11	8.79638e-11	9.10605e-11	1.20379e-10
0.346725	-3.8581e-11	-7.71304e-12	-1.53709e-12	1.54323e-11	3.70422e-11	4.47614e-11	7.25366e-11	1.09582e-10	1.85196e-10	0.086	-1.00295e-10	-1.00341e-10	-1.04925e-10	-1.0182e-10	-9.87974e-11	-1.01966e-10	-1.06514e-10	-1.09591e-10	-9.26971e-11	0.346725	9.25e-12	1.39e-11	2.01e-11	2.62e-11	4.94e-11	5.4e-11	6.64e-11	9.88e-11	1.4e-10	0.086	-1.70525e-09	-1.68524e-09	-1.69002e-09	-1.6713e-09	-1.70363e-09	-1.68832e-09	-1.68231e-09	-1.696e-09	-1.70993e-09	0.346725	-1.38879e-11	-3.08713e-12	2.31464e-11	3.08645e-11	5.40161e-11	4.93862e-11	7.8712e-11	1.01852e-10	1.26545e-10
0.34773	-3.54933e-11	-5.63029e-15	1.54554e-12	1.69767e-11	4.16687e-11	4.47547e-11	6.79045e-11	1.11118e-10	1.83652e-10	0.08625	-1.04934e-10	-9.88156e-11	-1.00332e-10	-9.87883e-11	-9.41949e-11	-1.07975e-10	-1.09564e-10	-1.1413e-10	-1.03327e-10	0.34773	-4.62e-12	8.45e-15	2.47e-11	2.78e-11	4.32e-11	5.56e-11	6.94e-11	1e-10	1.3e-10	0.08625	-1.69463e-09	-1.6761e-09	-1.69604e-09	-1.66679e-09	-1.68845e-09	-1.68376e-09	-1.69135e-09	-1.6869e-09	-1.70229e-09	0.34773	-1.54272e-11	-1.07985e-11	2.16071e-11	2.93241e-11	4.93834e-11	4.78424e-11	8.17906e-11	1.00314e-10	1.21928e-10
0.348735	-2.62414e-11	-7.71417e-12	1.07945e-11	2.00632e-11	4.62996e-11	4.32114e-11	6.32774e-11	1.1574e-10	1.85193e-10	0.0865	-1.07948e-10	-1.04843e-10	-9.8761e-11	-9.87792e-11	-9.87974e-11	-1.04934e-10	-1.11098e-10	-1.06523e-10	-1.01884e-10	0.348735	-3.09e-12	9.25e-12	1.08e-11	2.47e-11	3.7e-11	6.64e-11	6.48e-11	1.1e-10	1.36e-10	0.0865	-1.70065e-09	-1.6822e-09	-1.69755e-09	-1.66981e-09	-1.68991e-09	-1.68528e-09	-1.68531e-09	-1.6929e-09	-1.7023e-09	0.348735	-1.55004e-12	-6.17933e-12	2.3147e-11	3.24061e-11	4.01321e-11	4.78446e-11	7.5622e-11	1.00313e-10	1.41972e-10
0.34974	-3.24061e-11	-9.26364e-12	-3.08319e-12	2.46908e-11	5.40076e-11	4.01276e-11	6.6364e-11	1.03405e-10	1.83647e-10	0.08675	-9.72815e-11	-9.42313e-11	-9.56836e-11	-1.00259e-10	-1.07939e-10	-1.00386e-10	-1.09573e-10	-1.04961e-10	-1.04889e-10	0.34974	-7.88e-15	-1.54e-12	9.26e-12	1.54e-11	4.32e-11	6.64e-11	7.72e-11	1.05e-10	1.42e-10	0.08675	-1.69915e-09	-1.69132e-09	-1.68844e-09	-1.66983e-09	-1.69448e-09	-1.6899e-09	-1.68681e-09	-1.68527e-09	-1.71138e-09	0.34974	-6.17144e-12	-1.85126e-11	1.85217e-11	2.77802e-11	4.93794e-11	5.55565e-11	7.25377e-11	1.00315e-10	1.34272e-10
0.350745	-3.08657e-11	-2.15998e-11	-7.71304e-12	2.46914e-11	4.16743e-11	4.32108e-11	7.71574e-11	1.04944e-10	1.72855e-10	0.087	-9.572e-11	-9.87792e-11	-9.26516e-11	-9.26698e-11	-1.01866e-10	-1.08057e-10	-1.08066e-10	-1.06505e-10	-9.88156e-11	0.350745	-1.85e-11	-6.17e-12	1.39e-11	1.23e-11	4.32e-11	7.25e-11	8.64e-11	1.13e-10	1.37e-10	0.087	-1.69608e-09	-1.68071e-09	-1.69453e-09	-1.66979e-09	-1.69144e-09	-1.69595e-09	-1.68837e-09	-1.67917e-09	-1.70073e-09	0.350745	-6.17482e-12	-1.23485e-11	2.0061e-11	2.62324e-11	4.32142e-11	5.86442e-11	7.8703e-11	1.034e-10	1.45065e-10
0.35175	-2.93235e-11	-1.69817e-11	-3.08826e-12	2.16099e-11	4.47535e-11	4.32136e-11	6.9454e-11	1.09572e-10	1.80561e-10	0.08725	-1.00295e-10	-1.04934e-10	-9.87247e-11	-9.72178e-11	-9.72723e-11	-1.20267e-10	-1.12551e-10	-1.11062e-10	-1.00277e-10	0.35175	-1.39e-11	-7.88e-15	1.55e-12	1.85e-11	2.47e-11	6.79e-11	8.18e-11	1.13e-10	1.53e-10	0.08725	-1.69447e-09	-1.68213e-09	-1.70211e-09	-1.66216e-09	-1.68835e-09	-1.68225e-09	-1.69289e-09	-1.68525e-09	-1.69613e-09	0.35175	-1.08047e-11	-1.23457e-11	1.69744e-11	1.54379e-11	4.32091e-11	6.01892e-11	7.25338e-11	1.06486e-10	1.45068e-10
0.352755	-3.08629e-11	-2.77774e-11	-3.08657e-12	2.93184e-11	4.32108e-11	4.78395e-11	7.87058e-11	1.11118e-10	1.79022e-10	0.0875	-1.0182e-10	-1.09473e-10	-9.72269e-11	-1.00277e-10	-1.00304e-10	-1.14185e-10	-9.88702e-11	-1.06523e-10	-9.57564e-11	0.352755	-1.7e-11	-1.54e-11	1.69e-15	2.78e-11	3.24e-11	6.95e-11	8.49e-11	1.25e-10	1.54e-10	0.0875	-1.68375e-09	-1.67611e-09	-1.68697e-09	-1.66215e-09	-1.68529e-09	-1.68065e-09	-1.68222e-09	-1.6883e-09	-1.70215e-09	0.352755	-2.00576e-11	-1.08041e-11	9.26252e-12	1.85188e-11	3.54989e-11	6.48162e-11	6.48258e-11	1.08034e-10	1.41987e-10
0.35376	-2.46937e-11	-3.39477e-11	-3.08657e-12	2.62409e-11	3.85827e-11	4.63008e-11	8.33351e-11	1.17284e-10	1.80564e-10	0.08775	-9.72178e-11	-9.7336e-11	-9.57291e-11	-9.7236e-11	-1.01866e-10	-1.05016e-10	-1.01848e-10	-1.07948e-10	-1.03373e-10	0.35376	-2.78e-11	-2.01e-11	3.08e-12	3.86e-11	3.7e-11	7.72e-11	8.95e-11	1.2e-10	1.42e-10	0.08775	-1.67771e-09	-1.68677e-09	-1.6991e-09	-1.66827e-09	-1.68678e-09	-1.68215e-09	-1.67756e-09	-1.68218e-09	-1.69315e-09	0.35376	-1.54373e-11	-1.23406e-11	9.25801e-12	2.00655e-11	3.70354e-11	6.48218e-11	7.8703e-11	1.2191e-10	1.51237e-10
0.354765	-2.16065e-11	-2.77802e-11	-3.08375e-12	3.70275e-11	3.54944e-11	5.09255e-11	8.17968e-11	1.08039e-10	1.80568e-10	0.088	-9.11174e-11	-1.03382e-10	-1.01748e-10	-9.572e-11	-1.04943e-10	-1.08048e-10	-1.03373e-10	-9.58201e-11	-1.06423e-10	0.354765	-2.78e-11	-2.62e-11	-1.54e-12	1.54e-11	4.32e-11	7.1e-11	8.8e-11	1.22e-10	1.5e-10	0.088	-1.69887e-09	-1.69139e-09	-1.70218e-09	-1.67124e-09	-1.68369e-09	-1.67911e-09	-1.67449e-09	-1.6761e-09	-1.71133e-09	0.354765	-2.31464e-11	1.53653e-12	4.62985e-12	2.93151e-11	2.93258e-11	7.56141e-11	8.02513e-11	1.09579e-10	1.48155e-10
0.35577	-2.00661e-11	-2.46942e-11	4.6276e-12	1.69868e-11	2.93258e-11	4.78457e-11	8.79627e-11	1.24998e-10	1.89822e-10	0.08825	-9.56654e-11	-1.06432e-10	-8.96196e-11	-1.00295e-10	-1.08012e-10	-1.14103e-10	-1.00368e-10	-1.06396e-10	-9.8852e-11	0.35577	-4.01e-11	-9.27e-12	4.63e-12	2.93e-11	4.63e-11	7.1e-11	9.72e-11	1.27e-10	1.48e-10	0.08825	-1.67318e-09	-1.68836e-09	-1.69456e-09	-1.6515e-09	-1.67453e-09	-1.67909e-09	-1.67599e-09	-1.68517e-09	-1.70079e-09	0.35577	-2.31515e-11	-3.08826e-12	4.50423e-15	1.85301e-11	3.08674e-11	6.79101e-11	8.33379e-11	1.14201e-10	1.43529e-10
0.356775	-2.7778e-11	-2.62302e-11	6.17426e-12	2.62308e-11	3.24061e-11	5.55576e-11	8.17997e-11	1.18841e-10	1.92911e-10	0.0885	-9.72542e-11	-1.00332e-10	-9.57109e-11	-1.01829e-10	-1.07984e-10	-1.03491e-10	-1.06468e-10	-1.01866e-10	-1.0487e-10	0.356775	-3.24e-11	-2.47e-11	9.26e-12	3.7e-11	4.78e-11	7.56e-11	1.03e-10	1.19e-10	1.48e-10	0.0885	-1.69131e-09	-1.68678e-09	-1.69301e-09	-1.66207e-09	-1.67605e-09	-1.67908e-09	-1.6745e-09	-1.67758e-09	-1.70527e-09	0.356775	-2.93224e-11	-1.23378e-11	7.7136e-12	3.70304e-11	3.70377e-11	7.56175e-11	8.79627e-11	1.14202e-10	1.49699e-10
0.35778	-3.24101e-11	-1.2353e-11	1.08007e-11	2.16065e-11	2.77791e-11	6.17285e-11	9.10464e-11	1.35798e-10	1.9754e-10	0.08875	-1.03373e-10	-9.72906e-11	-1.06368e-10	-9.87701e-11	-1.00395e-10	-1.07993e-10	-1.09546e-10	-9.88156e-11	-9.88338e-11	0.35778	-3.4e-11	-1.39e-11	7.72e-12	4.63e-11	4.17e-11	7.87e-11	9.26e-11	1.1e-10	1.37e-10	0.08875	-1.68833e-09	-1.68063e-09	-1.69605e-09	-1.66514e-09	-1.68517e-09	-1.6775e-09	-1.67901e-09	-1.67441e-09	-1.70069e-09	0.35778	-3.54905e-11	1.53709e-12	7.71698e-12	3.24135e-11	4.01237e-11	7.40782e-11	8.02558e-11	1.11116e-10	1.55865e-10
0.358785	-4.01214e-11	-1.69716e-11	9.26195e-12	1.85177e-11	2.31521e-11	6.0192e-11	8.02575e-11	1.21926e-10	2.00629e-10	0.089	-1.04952e-10	-1.0488e-10	-9.72906e-11	-9.56927e-11	-1.06405e-10	-1.06477e-10	-1.08012e-10	-1.03382e-10	-1.03409e-10	0.358785	-4.94e-11	-2.16e-11	1.08e-11	4.17e-11	5.09e-11	6.79e-11	9.26e-11	1.13e-10	1.56e-10	0.089	-1.68216e-09	-1.673e-09	-1.69602e-09	-1.65752e-09	-1.67756e-09	-1.66838e-09	-1.66991e-09	-1.66228e-09	-1.69458e-09	0.358785	-2.7783e-11	-1.53934e-12	9.2597e-12	4.01203e-11	3.85843e-11	7.40765e-11	8.6425e-11	1.0803e-10	1.4507e-10
0.35979	-3.70411e-11	-9.26533e-12	1.38896e-11	1.08035e-11	2.62324e-11	6.94388e-11	8.79666e-11	1.2501e-10	2.08338e-10	0.08925	-1.07939e-10	-1.01884e-10	-9.87428e-11	-9.41949e-11	-9.88611e-11	-1.03436e-10	-1.03436e-10	-1.04916e-10	-1.09519e-10	0.35979	-4.32e-11	-6.18e-12	2.01e-11	3.86e-11	5.4e-11	6.64e-11	8.64e-11	1.05e-10	1.51e-10	0.08925	-1.67301e-09	-1.67907e-09	-1.68839e-09	-1.65602e-09	-1.67142e-09	-1.67445e-09	-1.67285e-09	-1.6774e-09	-1.69758e-09	0.35979	-3.08629e-11	6.17032e-12	1.08002e-11	3.39556e-11	4.32131e-11	7.09939e-11	9.56785e-11	1.04939e-10	1.38901e-10
0.360795	-4.01271e-11	-1.69699e-11	1.85132e-11	4.63435e-12	2.00678e-11	5.40245e-11	9.41341e-11	1.40429e-10	2.02172e-10	0.0895	-9.57746e-11	-1.03418e-10	-9.57746e-11	-1.01839e-10	-1.06396e-10	-1.06468e-10	-1.04934e-10	-1.01902e-10	-1.06505e-10	0.360795	-3.86e-11	-1.7e-11	1.39e-11	4.17e-11	5.25e-11	6.17e-11	7.87e-11	1.03e-10	1.4e-10	0.0895	-1.679e-09	-1.68215e-09	-1.68681e-09	-1.66666e-09	-1.67292e-09	-1.67902e-09	-1.66372e-09	-1.66835e-09	-1.69607e-09	0.360795	-2.62369e-11	6.17426e-12	4.63999e-12	3.70366e-11	5.09244e-11	7.56164e-11	9.10549e-11	9.10605e-11	1.46602e-10
0.3618	-4.78378e-11	-7.71811e-12	6.18045e-12	1.07979e-11	2.77774e-11	6.48123e-11	8.33458e-11	1.29638e-10	2.00631e-10	0.08975	-9.8761e-11	-1.07966e-10	-1.0793e-10	-1.06432e-10	-9.88338e-11	-1.06505e-10	-1.04925e-10	-1.06423e-10	-1.06496e-10	0.3618	-2.78e-11	-1.55e-12	2.78e-11	3.86e-11	6.17e-11	6.17e-11	7.87e-11	1.08e-10	1.42e-10	0.08975	-1.66994e-09	-1.68062e-09	-1.68525e-09	-1.66363e-09	-1.67446e-09	-1.67143e-09	-1.66519e-09	-1.6698e-09	-1.69457e-09	0.3618	-2.46931e-11	9.25689e-12	2.6224e-11	3.39579e-11	4.78429e-11	6.7905e-11	8.95116e-11	9.56819e-11	1.28102e-10
0.362805	-4.47558e-11	-3.08713e-12	1.38856e-11	3.09389e-12	3.08623e-11	6.01875e-11	9.56763e-11	1.23467e-10	2.09883e-10	0.09	-1.00286e-10	-1.01857e-10	-1.03391e-10	-1.01902e-10	-1.01866e-10	-1.09537e-10	-1.0192e-10	-1.00368e-10	-1.07984e-10	0.362805	-2.31e-11	4.63e-12	1.85e-11	4.63e-11	6.02e-11	5.25e-11	8.33e-11	9.11e-11	1.37e-10	0.09	-1.67903e-09	-1.67605e-09	-1.68067e-09	-1.65606e-09	-1.67592e-09	-1.67291e-09	-1.66522e-09	-1.66529e-09	-1.70063e-09	0.362805	-2.46908e-11	4.6321e-12	1.5443e-11	4.62918e-11	4.78429e-11	6.17325e-11	9.10532e-11	9.56808e-11	1.35802e-10
0.36381	-4.32119e-11	-2.25211e-15	1.08052e-11	1.54266e-11	2.47004e-11	5.40144e-11	8.79649e-11	1.29636e-10	2.08343e-10	0.09025	-9.72723e-11	-9.57746e-11	-9.72723e-11	-1.04907e-10	-1.06405e-10	-1.06459e-10	-1.09509e-10	-1.03382e-10	-1.01948e-10	0.36381	-7.72e-12	1.85e-11	2.78e-11	3.55e-11	5.56e-11	4.63e-11	7.25e-11	9.88e-11	1.28e-10	0.09025	-1.67752e-09	-1.67909e-09	-1.68211e-09	-1.66817e-09	-1.66378e-09	-1.67285e-09	-1.66818e-09	-1.67591e-09	-1.69459e-09	0.36381	-2.00604e-11	6.17144e-12	3.23999e-11	4.01259e-11	5.09278e-11	5.86448e-11	9.10543e-11	8.79722e-11	1.23471e-10
0.364815	-4.16687e-11	-3.08263e-12	1.38867e-11	1.08052e-11	4.01203e-11	4.63019e-11	7.40844e-11	1.35803e-10	2.068e-10	0.0905	-1.01811e-10	-1.04852e-10	-9.87519e-11	-1.01839e-10	-9.73087e-11	-9.88611e-11	-1.06468e-10	-1.034e-10	-1.1108e-10	0.364815	-1.23e-11	9.26e-12	3.55e-11	4.01e-11	5.71e-11	4.78e-11	6.64e-11	9.26e-11	1.22e-10	0.0905	-1.67139e-09	-1.68215e-09	-1.67148e-09	-1.6606e-09	-1.67133e-09	-1.66071e-09	-1.65304e-09	-1.67141e-09	-1.69912e-09	0.364815	-9.26758e-12	3.08657e-12	2.46982e-11	3.54972e-11	5.2475e-11	5.55565e-11	9.25948e-11	9.41364e-11	1.34262e-10
0.36582	-4.01259e-11	4.62535e-12	9.26139e-12	1.23485e-11	4.16692e-11	4.78446e-11	7.87024e-11	1.25009e-10	2.05257e-10	0.09075	-9.87338e-11	-9.88065e-11	-9.7236e-11	-9.57564e-11	-1.0182e-10	-1.06396e-10	-1.00386e-10	-1.03364e-10	-1.14167e-10	0.36582	-1.08e-11	9.26e-12	1.85e-11	3.09e-11	5.71e-11	4.94e-11	7.1e-11	1e-10	1.31e-10	0.09075	-1.66824e-09	-1.6807e-09	-1.6775e-09	-1.65759e-09	-1.67141e-09	-1.67133e-09	-1.66816e-09	-1.67295e-09	-1.69762e-09	0.36582	-2.00559e-11	1.68909e-15	3.24028e-11	3.55e-11	6.32645e-11	4.78463e-11	8.79677e-11	8.95149e-11	1.35806e-10
0.366825	-4.01242e-11	-1.12606e-15	9.25745e-12	2.00576e-11	4.47541e-11	5.70919e-11	6.94556e-11	1.21923e-10	2.05254e-10	0.091	-8.95923e-11	-9.87701e-11	-9.72542e-11	-1.01775e-10	-1.00386e-10	-9.88247e-11	-1.0645e-10	-9.72723e-11	-1.1108e-10	0.366825	-3.09e-12	9.26e-12	2.01e-11	2.93e-11	5.4e-11	5.25e-11	7.72e-11	9.26e-11	1.34e-10	0.091	-1.65762e-09	-1.68982e-09	-1.67604e-09	-1.67123e-09	-1.67747e-09	-1.67437e-09	-1.66215e-09	-1.679e-09	-1.69758e-09	0.366825	-1.23485e-11	1.54385e-12	2.31509e-11	4.78311e-11	4.6307e-11	5.24705e-11	8.48806e-11	9.72212e-11	1.29641e-10
0.36783	-3.70332e-11	-7.71304e-12	3.08713e-12	1.38957e-11	4.47535e-11	4.01316e-11	8.17839e-11	1.28088e-10	1.97541e-10	0.09125	-9.41312e-11	-9.87519e-11	-1.01766e-10	-9.42495e-11	-1.11025e-10	-1.00323e-10	-1.06477e-10	-9.87883e-11	-1.0192e-10	0.36783	-7.72e-12	9.26e-12	2.47e-11	2.01e-11	4.01e-11	5.56e-11	7.1e-11	1.1e-10	1.3e-10	0.09125	-1.66974e-09	-1.68686e-09	-1.6806e-09	-1.66061e-09	-1.66992e-09	-1.66214e-09	-1.66207e-09	-1.6699e-09	-1.69149e-09	0.36783	-1.08019e-11	4.62478e-12	1.85239e-11	3.08696e-11	5.24699e-11	5.40138e-11	8.17923e-11	8.95194e-11	1.37347e-10
0.368835	-1.85324e-11	-6.17708e-12	-1.54328e-12	2.4688e-11	4.01293e-11	4.01276e-11	6.63657e-11	1.21918e-10	1.91365e-10	0.0915	-9.71905e-11	-9.57018e-11	-9.11811e-11	-1.04861e-10	-1.06541e-10	-1.034e-10	-1.04916e-10	-1.03382e-10	-1.03391e-10	0.368835	-1.08e-11	9.26e-12	1.08e-11	1.54e-11	3.7e-11	6.02e-11	7.87e-11	9.26e-11	1.31e-10	0.0915	-1.66684e-09	-1.69288e-09	-1.67911e-09	-1.65602e-09	-1.67751e-09	-1.6544e-09	-1.65445e-09	-1.67137e-09	-1.69453e-09	0.368835	-6.17539e-12	-6.17088e-12	2.62324e-11	2.46954e-11	5.40104e-11	5.24716e-11	7.40799e-11	1.0648e-10	1.2964e-10
0.36984	-3.54876e-11	-1.54295e-11	-6.16976e-12	2.31538e-11	4.62951e-11	4.62963e-11	6.32769e-11	1.12664e-10	1.80569e-10	0.09175	-9.41494e-11	-9.56927e-11	-1.0172e-10	-1.01893e-10	-1.11062e-10	-1.06386e-10	-9.88429e-11	-1.04934e-10	-1.03418e-10	0.36984	-7.72e-12	6.17e-12	1.55e-12	2.47e-11	3.4e-11	7.1e-11	6.64e-11	1.17e-10	1.39e-10	0.09175	-1.67896e-09	-1.68213e-09	-1.6807e-09	-1.6636e-09	-1.67905e-09	-1.64677e-09	-1.65444e-09	-1.67131e-09	-1.69762e-09	0.36984	-7.71811e-12	-1.08019e-11	2.46925e-11	2.62324e-11	4.32159e-11	5.09329e-11	7.25343e-11	1.04943e-10	1.34265e-10
0.370845	-3.08634e-11	-1.54334e-11	-1.54666e-12	3.3946e-11	4.32136e-11	4.62979e-11	6.63623e-11	1.14202e-10	1.82114e-10	0.092	-9.26516e-11	-9.71905e-11	-8.96469e-11	-1.04898e-10	-1.06514e-10	-9.26698e-11	-1.04834e-10	-1.04934e-10	-1.06459e-10	0.370845	-1.85e-11	-1.39e-11	3.09e-12	1.7e-11	3.09e-11	7.25e-11	8.18e-11	1.14e-10	1.44e-10	0.092	-1.66832e-09	-1.66382e-09	-1.69285e-09	-1.66052e-09	-1.673e-09	-1.65437e-09	-1.66048e-09	-1.66066e-09	-1.70216e-09	0.370845	-1.38839e-11	-1.23474e-11	2.31453e-11	1.85222e-11	4.32114e-11	6.17246e-11	7.09899e-11	1.01862e-10	1.37354e-10
0.37185	-2.00694e-11	-1.69778e-11	-6.16976e-12	2.7783e-11	4.47535e-11	4.47569e-11	7.25326e-11	1.14202e-10	2.00612e-10	0.09225	-1.00259e-10	-9.26698e-11	-1.00213e-10	-1.0035e-10	-1.0645e-10	-9.11447e-11	-9.2688e-11	-1.03445e-10	-1.04989e-10	0.37185	-1.7e-11	-1.23e-11	1.54e-12	1.7e-11	2.62e-11	7.25e-11	8.03e-11	1.23e-10	1.47e-10	0.09225	-1.66221e-09	-1.67286e-09	-1.68377e-09	-1.64828e-09	-1.68055e-09	-1.65744e-09	-1.65138e-09	-1.66514e-09	-1.69305e-09	0.37185	-4.63773e-12	-1.69722e-11	1.08092e-11	1.85177e-11	4.16681e-11	5.40222e-11	6.63651e-11	1.12655e-10	1.45068e-10
0.372855	-2.77746e-11	-2.31487e-11	-1.54385e-12	3.24067e-11	4.16687e-11	4.78435e-11	7.4077e-11	1.11118e-10	1.79031e-10	0.0925	-9.8761e-11	-1.00204e-10	-9.42131e-11	-1.01857e-10	-1.00414e-10	-1.04807e-10	-9.57109e-11	-1.095e-10	-1.11053e-10	0.372855	-1.24e-11	-1.08e-11	-3.08e-12	2.47e-11	3.09e-11	7.25e-11	8.95e-11	1.1e-10	1.47e-10	0.0925	-1.67134e-09	-1.67144e-09	-1.68215e-09	-1.64517e-09	-1.67445e-09	-1.65284e-09	-1.65287e-09	-1.65908e-09	-1.69444e-09	0.372855	-1.69699e-11	-1.08041e-11	1.54289e-11	1.38941e-11	3.85798e-11	6.6355e-11	7.25326e-11	1.11119e-10	1.51238e-10
0.37386	-2.31509e-11	-2.7774e-11	1.54103e-12	3.08645e-11	3.8581e-11	5.5552e-11	7.40827e-11	1.12662e-10	1.85196e-10	0.09275	-9.56745e-11	-8.95741e-11	-1.00241e-10	-1.03436e-10	-1.11025e-10	-9.57837e-11	-1.03327e-10	-1.03427e-10	-1.06587e-10	0.37386	-2.62e-11	-7.72e-12	-1.54e-12	2.32e-11	3.4e-11	7.41e-11	8.95e-11	1.17e-10	1.57e-10	0.09275	-1.67444e-09	-1.68054e-09	-1.67601e-09	-1.64669e-09	-1.66683e-09	-1.64522e-09	-1.65744e-09	-1.66054e-09	-1.68228e-09	0.37386	-1.23519e-11	-7.71754e-12	9.26195e-12	2.16026e-11	2.9328e-11	6.1733e-11	7.40787e-11	1.15745e-10	1.48156e-10
0.374865	-2.31504e-11	-1.8525e-11	-1.54159e-12	2.62358e-11	3.24106e-11	4.63053e-11	8.7961e-11	1.20373e-10	1.95993e-10	0.093	-9.11174e-11	-8.95559e-11	-9.41494e-11	-1.11007e-10	-1.0645e-10	-1.03364e-10	-9.88156e-11	-1.01893e-10	-1.18705e-10	0.374865	-3.7e-11	-2.62e-11	0	2.47e-11	3.86e-11	7.72e-11	8.95e-11	1.22e-10	1.47e-10	0.093	-1.67295e-09	-1.67451e-09	-1.67146e-09	-1.64973e-09	-1.67281e-09	-1.6513e-09	-1.65443e-09	-1.65592e-09	-1.68679e-09	0.374865	-2.31464e-11	-7.71473e-12	9.25857e-12	2.00649e-11	3.54933e-11	6.17364e-11	7.87052e-11	1.17287e-10	1.48156e-10
0.37587	-2.62341e-11	-2.46908e-11	1.12606e-15	2.16077e-11	3.08674e-11	5.55548e-11	8.48795e-11	1.18837e-10	1.94456e-10	0.09325	-9.71541e-11	-9.71905e-11	-8.96014e-11	-1.00386e-10	-9.57655e-11	-1.04916e-10	-1.01793e-10	-1.06405e-10	-1.09637e-10	0.37587	-2.78e-11	-2.47e-11	1.54e-12	3.7e-11	3.7e-11	8.18e-11	8.95e-11	1.2e-10	1.59e-10	0.09325	-1.67602e-09	-1.67601e-09	-1.68059e-09	-1.64672e-09	-1.66058e-09	-1.65586e-09	-1.65592e-09	-1.64825e-09	-1.68832e-09	0.37587	-2.62364e-11	-3.08544e-12	6.17144e-12	2.4692e-11	3.54944e-11	7.56147e-11	7.71698e-11	1.11119e-10	1.49698e-10
0.376875	-2.46948e-11	-2.6233e-11	4.62816e-12	2.16082e-11	3.39444e-11	5.5561e-11	7.87142e-11	1.29634e-10	1.99084e-10	0.0935	-9.11174e-11	-9.87519e-11	-1.00213e-10	-1.01875e-10	-9.87519e-11	-1.01875e-10	-9.41949e-11	-9.73269e-11	-1.11126e-10	0.376875	-4.01e-11	-2.47e-11	1.55e-12	2.93e-11	4.63e-11	7.41e-11	9.72e-11	1.2e-10	1.56e-10	0.0935	-1.68205e-09	-1.67907e-09	-1.68215e-09	-1.64982e-09	-1.64986e-09	-1.6467e-09	-1.65441e-09	-1.64523e-09	-1.6838e-09	0.376875	-3.08629e-11	4.62647e-12	-1.53653e-12	2.77797e-11	3.24123e-11	7.25366e-11	9.10436e-11	1.1266e-10	1.497e-10
0.37788	-2.9323e-11	-2.00627e-11	4.63379e-12	2.77757e-11	1.54424e-11	6.32712e-11	9.1047e-11	1.34262e-10	2.03714e-10	0.09375	-9.5629e-11	-9.72269e-11	-9.41767e-11	-1.06459e-10	-9.87792e-11	-1.01884e-10	-9.56381e-11	-1.04907e-10	-1.14185e-10	0.37788	-4.17e-11	-2.62e-11	1.85e-11	4.32e-11	5.56e-11	8.18e-11	9.41e-11	1.17e-10	1.57e-10	0.09375	-1.66686e-09	-1.67908e-09	-1.67909e-09	-1.6605e-09	-1.65438e-09	-1.64059e-09	-1.65435e-09	-1.65734e-09	-1.69139e-09	0.37788	-2.7783e-11	3.08938e-12	9.2552e-12	3.24061e-11	3.8581e-11	7.56164e-11	7.71721e-11	1.14201e-10	1.54325e-10
0.378885	-3.54899e-11	-1.38935e-11	1.54261e-11	2.46931e-11	2.3147e-11	6.17336e-11	8.48845e-11	1.29639e-10	2.09883e-10	0.094	-9.11629e-11	-9.56563e-11	-9.41221e-11	-1.06505e-10	-1.00323e-10	-1.06423e-10	-8.96105e-11	-1.06459e-10	-1.14212e-10	0.378885	-4.01e-11	-7.73e-12	1.85e-11	4.32e-11	4.79e-11	7.72e-11	9.88e-11	1.19e-10	1.57e-10	0.094	-1.66986e-09	-1.67755e-09	-1.67607e-09	-1.65905e-09	-1.65594e-09	-1.64824e-09	-1.64673e-09	-1.64524e-09	-1.69143e-09	0.378885	-3.5491e-11	9.25632e-12	7.71473e-12	2.9328e-11	4.16692e-11	6.63657e-11	8.48789e-11	1.09575e-10	1.49697e-10
0.37989	-2.62448e-11	-1.85166e-11	7.72261e-12	2.3147e-11	2.46954e-11	6.63601e-11	8.95082e-11	1.32724e-10	2.0526e-10	0.09425	-1.04816e-10	-8.9565e-11	-9.10719e-11	-1.09573e-10	-1.03391e-10	-1.00332e-10	-1.00204e-10	-1.03491e-10	-1.15655e-10	0.37989	-4.01e-11	-1.54e-11	2.31e-11	2.93e-11	6.33e-11	6.94e-11	9.26e-11	1.1e-10	1.47e-10	0.09425	-1.67754e-09	-1.67607e-09	-1.68368e-09	-1.66052e-09	-1.65744e-09	-1.65733e-09	-1.64675e-09	-1.64979e-09	-1.68981e-09	0.37989	-3.08679e-11	6.1737e-12	1.54779e-12	4.16596e-11	4.62991e-11	6.94455e-11	8.79655e-11	1.11112e-10	1.41984e-10
0.380895	-4.16625e-11	-1.54311e-11	1.69722e-11	1.54317e-11	3.3946e-11	6.79011e-11	8.79677e-11	1.40435e-10	2.08342e-10	0.0945	-9.72815e-11	-9.26061e-11	-9.10355e-11	-1.12605e-10	-1.04907e-10	-9.72451e-11	-9.26607e-11	-1.15664e-10	-1.02011e-10	0.380895	-3.7e-11	-2.82e-15	2.32e-11	4.78e-11	6.33e-11	6.64e-11	8.8e-11	1.02e-10	1.42e-10	0.0945	-1.68364e-09	-1.68517e-09	-1.68364e-09	-1.6529e-09	-1.65136e-09	-1.64059e-09	-1.65738e-09	-1.6574e-09	-1.67465e-09	0.380895	-3.24033e-11	4.63267e-12	7.72092e-12	2.93348e-11	5.24705e-11	6.63634e-11	8.6425e-11	1.00318e-10	1.40438e-10
0.3819	-4.01259e-11	-7.71754e-12	1.54334e-11	4.63604e-12	2.6242e-11	6.01909e-11	8.79677e-11	1.37352e-10	2.06803e-10	0.09475	-9.87519e-11	-9.71905e-11	-8.80309e-11	-1.06496e-10	-1.00341e-10	-9.72542e-11	-9.56836e-11	-1.1413e-10	-1.1413e-10	0.3819	-2.16e-11	7.72e-12	2.78e-11	4.94e-11	6.48e-11	6.48e-11	7.56e-11	8.8e-11	1.47e-10	0.09475	-1.67613e-09	-1.67757e-09	-1.66997e-09	-1.65291e-09	-1.65278e-09	-1.63747e-09	-1.6498e-09	-1.64982e-09	-1.69132e-09	0.3819	-1.85233e-11	1.07979e-11	2.62257e-11	5.09171e-11	5.55576e-11	6.94449e-11	8.79666e-11	1.01855e-10	1.35809e-10
0.382905	-4.01288e-11	-3.08826e-12	1.54306e-11	1.08019e-11	3.54916e-11	6.01875e-11	8.95093e-11	1.34267e-10	2.12966e-10	0.095	-9.72178e-11	-9.56563e-11	-9.56472e-11	-1.01875e-10	-1.00341e-10	-1.01802e-10	-9.87247e-11	-1.00404e-10	-1.14239e-10	0.382905	-2.62e-11	1.23e-11	2.32e-11	3.7e-11	5.86e-11	5.4e-11	8.64e-11	1.06e-10	1.42e-10	0.095	-1.6898e-09	-1.67291e-09	-1.67904e-09	-1.66201e-09	-1.64214e-09	-1.64202e-09	-1.64675e-09	-1.65133e-09	-1.6883e-09	0.382905	-1.54362e-11	3.09107e-12	1.69823e-11	4.16709e-11	5.70981e-11	6.48162e-11	8.79638e-11	9.87685e-11	1.31181e-10
0.38391	-4.93789e-11	-3.086e-12	9.26252e-12	1.3889e-11	3.39534e-11	5.86459e-11	8.79638e-11	1.35805e-10	2.00635e-10	0.09525	-9.42313e-11	-8.95741e-11	-9.72542e-11	-1.0035e-10	-1.04834e-10	-9.72451e-11	-9.41858e-11	-1.01875e-10	-1.20285e-10	0.38391	-1.7e-11	1.23e-11	2.47e-11	4.17e-11	5.56e-11	5.4e-11	7.41e-11	9.57e-11	1.28e-10	0.09525	-1.68676e-09	-1.6668e-09	-1.67905e-09	-1.65288e-09	-1.64509e-09	-1.64048e-09	-1.65428e-09	-1.65582e-09	-1.67607e-09	0.38391	-2.16015e-11	7.71417e-12	2.46908e-11	3.85821e-11	4.93879e-11	5.55638e-11	7.87131e-11	9.10594e-11	1.31177e-10
0.384915	-4.16709e-11	-1.54441e-12	1.08013e-11	1.54357e-11	3.5495e-11	6.01824e-11	7.71698e-11	1.26551e-10	2.11421e-10	0.0955	-1.06368e-10	-9.41312e-11	-1.03291e-10	-1.04898e-10	-9.11538e-11	-9.57291e-11	-9.71996e-11	-1.0645e-10	-1.11171e-10	0.384915	-7.72e-12	6.18e-12	2.62e-11	3.24e-11	5.86e-11	5.09e-11	7.1e-11	9.72e-11	1.37e-10	0.0955	-1.67607e-09	-1.6699e-09	-1.6715e-09	-1.64829e-09	-1.64044e-09	-1.63443e-09	-1.64218e-09	-1.64062e-09	-1.67449e-09	0.384915	-1.54323e-11	6.17426e-12	2.77774e-11	3.54983e-11	4.93862e-11	6.17263e-11	8.48772e-11	9.87679e-11	1.25008e-10
0.38592	-4.01276e-11	-3.08375e-12	7.71923e-12	2.46847e-11	3.54983e-11	4.6303e-11	8.17912e-11	1.23461e-10	1.99085e-10	0.09575	-9.87883e-11	-9.71723e-11	-9.11447e-11	-1.01857e-10	-9.41858e-11	-1.01766e-10	-9.56836e-11	-1.04925e-10	-1.11089e-10	0.38592	-7.72e-12	1.08e-11	2.93e-11	3.24e-11	5.4e-11	5.4e-11	6.64e-11	1e-10	1.27e-10	0.09575	-1.676e-09	-1.68357e-09	-1.68511e-09	-1.6543e-09	-1.62373e-09	-1.64347e-09	-1.6512e-09	-1.64358e-09	-1.67751e-09	0.38592	-7.71867e-12	7.71248e-12	2.62341e-11	4.01181e-11	5.24716e-11	5.40144e-11	8.1794e-11	1.00313e-10	1.23464e-10
0.386925	-4.4749e-11	3.08263e-12	1.23423e-11	1.23536e-11	4.32086e-11	4.47558e-11	7.87063e-11	1.1575e-10	1.89832e-10	0.096	-9.41494e-11	-9.10719e-11	-9.40948e-11	-9.88702e-11	-1.0487e-10	-9.26698e-11	-9.41767e-11	-1.0035e-10	-1.06541e-10	0.386925	-7.72e-12	3.09e-12	2.62e-11	2.62e-11	5.09e-11	5.56e-11	7.56e-11	1.08e-10	1.25e-10	0.096	-1.67444e-09	-1.67145e-09	-1.673e-09	-1.64372e-09	-1.63886e-09	-1.63131e-09	-1.64053e-09	-1.64358e-09	-1.67449e-09	0.386925	-6.17764e-12	-1.53991e-12	2.00683e-11	2.46965e-11	5.5556e-11	4.47597e-11	7.87075e-11	1.00313e-10	1.26548e-10
0.38793	-3.24157e-11	-1.54216e-12	6.17313e-12	2.0061e-11	4.16715e-11	4.47513e-11	7.2536e-11	1.18831e-10	2.02161e-10	0.09625	-9.10446e-11	-8.79854e-11	-8.96014e-11	-1.12514e-10	-1.03391e-10	-9.56563e-11	-9.87428e-11	-1.01829e-10	-1.11107e-10	0.38793	-1.23e-11	4.63e-12	2.47e-11	1.54e-11	4.63e-11	6.33e-11	6.79e-11	1.05e-10	1.3e-10	0.09625	-1.66987e-09	-1.67136e-09	-1.67441e-09	-1.6528e-09	-1.63594e-09	-1.62819e-09	-1.63288e-09	-1.64057e-09	-1.67592e-09	0.38793	-1.69705e-11	-1.54272e-12	2.93168e-11	2.00683e-11	5.24722e-11	4.78418e-11	7.5622e-11	9.8773e-11	1.26549e-10
0.388935	-3.85742e-11	-3.09163e-12	5.63029e-16	2.31498e-11	4.78407e-11	3.39612e-11	7.09927e-11	1.17291e-10	1.89828e-10	0.0965	-8.65058e-11	-8.79945e-11	-1.00195e-10	-1.01902e-10	-1.00313e-10	-9.4113e-11	-9.87428e-11	-9.87701e-11	-1.14185e-10	0.388935	-1.54e-11	7.72e-12	1.85e-11	2.16e-11	3.7e-11	6.79e-11	8.02e-11	1.06e-10	1.31e-10	0.0965	-1.67141e-09	-1.66834e-09	-1.66682e-09	-1.65278e-09	-1.64196e-09	-1.62969e-09	-1.64046e-09	-1.64664e-09	-1.66375e-09	0.388935	-1.23491e-11	-6.75634e-15	2.31481e-11	3.086e-11	5.09267e-11	5.09312e-11	7.56181e-11	1.04941e-10	1.26549e-10
0.38994	-2.31571e-11	-1.8511e-11	-4.62985e-12	2.77769e-11	5.09216e-11	4.78367e-11	7.40754e-11	1.20372e-10	1.88283e-10	0.09675	-9.55744e-11	-9.25515e-11	-9.11174e-11	-9.8761e-11	-9.72633e-11	-8.80309e-11	-9.41858e-11	-9.57655e-11	-1.14167e-10	0.38994	-1.55e-12	9.25e-12	7.72e-12	2.16e-11	3.09e-11	6.64e-11	7.87e-11	1.13e-10	1.4e-10	0.09675	-1.67902e-09	-1.67436e-09	-1.67134e-09	-1.64058e-09	-1.63285e-09	-1.62818e-09	-1.63897e-09	-1.64513e-09	-1.66675e-09	0.38994	-1.54295e-11	-1.69705e-11	1.3898e-11	2.62353e-11	4.47575e-11	6.17268e-11	6.79079e-11	1.04943e-10	1.26554e-10
0.390945	-2.93207e-11	-1.08052e-11	-9.25689e-12	2.62336e-11	3.55068e-11	4.78407e-11	7.09944e-11	1.12663e-10	1.94449e-10	0.097	-8.65331e-11	-8.95832e-11	-9.26243e-11	-9.41858e-11	-1.00304e-10	-9.2597e-11	-9.71632e-11	-1.06414e-10	-1.08048e-10	0.390945	-1.23e-11	-9.25e-12	1.7e-11	2.62e-11	2.93e-11	7.25e-11	7.87e-11	1.19e-10	1.42e-10	0.097	-1.67448e-09	-1.66376e-09	-1.66989e-09	-1.64051e-09	-1.63279e-09	-1.62969e-09	-1.63744e-09	-1.64204e-09	-1.66981e-09	0.390945	-9.26477e-12	-1.85188e-11	2.77718e-11	2.00621e-11	4.47552e-11	6.01881e-11	6.94455e-11	1.03402e-10	1.40431e-10
0.39195	-3.0864e-11	-9.26364e-12	-6.17482e-12	1.85278e-11	5.09199e-11	4.47575e-11	7.71586e-11	1.14204e-10	1.88287e-10	0.09725	-9.56199e-11	-9.8661e-11	-9.86974e-11	-9.71814e-11	-1.0182e-10	-9.71996e-11	-8.9565e-11	-1.05016e-10	-1.05034e-10	0.39195	-1.85e-11	-6.18e-12	-6.16e-12	1.24e-11	3.09e-11	6.95e-11	8.33e-11	1.22e-10	1.39e-10	0.09725	-1.67289e-09	-1.6697e-09	-1.67742e-09	-1.64046e-09	-1.63275e-09	-1.62816e-09	-1.63897e-09	-1.63746e-09	-1.66978e-09	0.39195	-1.69722e-11	-1.85171e-11	2.1606e-11	1.23508e-11	4.47541e-11	5.86465e-11	6.48247e-11	1.0803e-10	1.34272e-10
0.392955	-2.77791e-11	-1.85194e-11	-7.71304e-12	3.39466e-11	4.32102e-11	4.78429e-11	6.79118e-11	1.17288e-10	1.99078e-10	0.0975	-9.41221e-11	-8.95559e-11	-9.26152e-11	-9.2688e-11	-9.72178e-11	-9.71905e-11	-9.10719e-11	-1.15664e-10	-1.1718e-10	0.392955	-2.31e-11	-1.23e-11	-1.54e-12	2.01e-11	3.55e-11	7.41e-11	8.18e-11	1.13e-10	1.45e-10	0.0975	-1.66682e-09	-1.65299e-09	-1.66377e-09	-1.63288e-09	-1.62523e-09	-1.62662e-09	-1.64045e-09	-1.639e-09	-1.66063e-09	0.392955	-1.38924e-11	-1.23451e-11	1.54323e-11	1.69739e-11	4.16664e-11	6.17308e-11	7.86985e-11	1.14202e-10	1.46607e-10
0.39396	-2.4692e-11	-2.77729e-11	1.12606e-15	3.395e-11	3.08719e-11	5.40127e-11	7.87052e-11	1.15747e-10	1.94455e-10	0.09775	-8.95377e-11	-8.79854e-11	-8.95559e-11	-1.03309e-10	-9.11356e-11	-9.10992e-11	-9.56199e-11	-1.12614e-10	-1.11162e-10	0.39396	-2.32e-11	-1.7e-11	4.63e-12	2.62e-11	3.4e-11	7.72e-11	9.26e-11	1.14e-10	1.54e-10	0.09775	-1.67285e-09	-1.65896e-09	-1.66828e-09	-1.63889e-09	-1.64351e-09	-1.62506e-09	-1.63139e-09	-1.64659e-09	-1.66065e-09	0.39396	-1.85183e-11	-3.09332e-12	7.72036e-12	1.54373e-11	3.24123e-11	6.32735e-11	6.79129e-11	1.18828e-10	1.45068e-10
0.394965	-2.00661e-11	-2.00644e-11	1.07985e-11	2.77814e-11	3.5495e-11	5.40144e-11	8.33356e-11	1.15746e-10	1.92913e-10	0.098	-8.95195e-11	-8.95377e-11	-9.40948e-11	-9.88065e-11	-9.87247e-11	-9.25697e-11	-8.95923e-11	-1.01911e-10	-1.12605e-10	0.394965	-2.78e-11	-2.01e-11	9.26e-12	2.93e-11	3.55e-11	8.18e-11	9.11e-11	1.33e-10	1.56e-10	0.098	-1.66682e-09	-1.65287e-09	-1.67131e-09	-1.63129e-09	-1.6482e-09	-1.62045e-09	-1.64501e-09	-1.63905e-09	-1.67282e-09	0.394965	-2.00644e-11	-1.23412e-11	1.07979e-11	2.62313e-11	3.24123e-11	6.1733e-11	8.02468e-11	1.11121e-10	1.41986e-10
0.39597	-2.46914e-11	-1.69789e-11	9.26026e-12	2.77785e-11	3.85793e-11	5.24739e-11	8.33384e-11	1.1575e-10	1.9754e-10	0.09825	-9.10719e-11	-9.55562e-11	-9.11356e-11	-1.00268e-10	-9.8761e-11	-8.9565e-11	-9.71632e-11	-1.00404e-10	-1.04971e-10	0.39597	-2.78e-11	-1.7e-11	3.09e-12	4.32e-11	3.4e-11	8.03e-11	8.95e-11	1.25e-10	1.57e-10	0.09825	-1.67288e-09	-1.6498e-09	-1.66377e-09	-1.62969e-09	-1.64822e-09	-1.61585e-09	-1.63746e-09	-1.64508e-09	-1.66834e-09	0.39597	-2.62364e-11	-7.71529e-12	4.50423e-15	2.46937e-11	4.16636e-11	6.48207e-11	8.17918e-11	1.15747e-10	1.49692e-10
0.396975	-2.62358e-11	-2.16037e-11	9.25745e-12	2.62369e-11	3.39511e-11	5.70998e-11	8.64284e-11	1.26545e-10	2.00626e-10	0.0985	-9.56472e-11	-8.04145e-11	-1.01748e-10	-9.41858e-11	-9.71996e-11	-9.56563e-11	-9.41858e-11	-1.14094e-10	-1.01939e-10	0.396975	-3.86e-11	-2.01e-11	3.94e-15	3.55e-11	4.63e-11	7.72e-11	9.72e-11	1.16e-10	1.47e-10	0.0985	-1.67287e-09	-1.65132e-09	-1.67438e-09	-1.62514e-09	-1.6467e-09	-1.61737e-09	-1.63592e-09	-1.6405e-09	-1.67284e-09	0.396975	-3.39466e-11	0	1.54385e-12	2.62364e-11	3.70427e-11	7.56153e-11	7.7167e-11	1.23458e-10	1.40447e-10
0.39798	-2.77808e-11	-2.00616e-11	3.09163e-12	2.77723e-11	2.62398e-11	5.71043e-11	1.01847e-10	1.26551e-10	2.02171e-10	0.09875	-9.41858e-11	-9.24787e-11	-9.4204e-11	-9.57109e-11	-9.1172e-11	-9.72087e-11	-9.8761e-11	-1.09646e-10	-1.12523e-10	0.39798	-4.78e-11	-9.26e-12	7.72e-12	3.86e-11	5.25e-11	8.8e-11	9.57e-11	1.17e-10	1.56e-10	0.09875	-1.66533e-09	-1.6544e-09	-1.67145e-09	-1.6313e-09	-1.64814e-09	-1.62042e-09	-1.64044e-09	-1.63438e-09	-1.66374e-09	0.39798	-2.62386e-11	7.71248e-12	4.62985e-12	2.93246e-11	4.32102e-11	7.09944e-11	8.02541e-11	1.1729e-10	1.52781e-10
0.398985	-3.39511e-11	-1.543e-11	1.07996e-11	1.0812e-11	2.93207e-11	6.4814e-11	9.10554e-11	1.32718e-10	2.06799e-10	0.099	-1.00222e-10	-8.49716e-11	-9.71996e-11	-1.0182e-10	-1.04825e-10	-9.56927e-11	-1.01793e-10	-1.17226e-10	-1.00505e-10	0.398985	-3.7e-11	-1.23e-11	2.31e-11	3.4e-11	5.4e-11	7.41e-11	9.11e-11	1.06e-10	1.54e-10	0.099	-1.67888e-09	-1.65744e-09	-1.68051e-09	-1.64501e-09	-1.63595e-09	-1.6189e-09	-1.63287e-09	-1.63593e-09	-1.66825e-09	0.398985	-2.62369e-11	4.6321e-12	7.71529e-12	3.85804e-11	4.47563e-11	7.56147e-11	9.25914e-11	1.11118e-10	1.52783e-10
0.39999	-3.70377e-11	-3.0922e-12	9.26308e-12	1.85138e-11	2.77785e-11	6.17342e-11	8.48845e-11	1.26555e-10	2.09885e-10	0.09925	-9.10719e-11	-9.25333e-11	-9.57291e-11	-1.01829e-10	-9.87701e-11	-9.56745e-11	-9.41858e-11	-1.14203e-10	-1.20158e-10	0.39999	-3.86e-11	-1.39e-11	1.39e-11	4.63e-11	6.33e-11	6.64e-11	9.26e-11	1.06e-10	1.51e-10	0.09925	-1.65761e-09	-1.65284e-09	-1.66838e-09	-1.63744e-09	-1.63582e-09	-1.61585e-09	-1.63741e-09	-1.64515e-09	-1.66679e-09	0.39999	-2.93184e-11	7.71417e-12	7.71923e-12	4.32102e-11	4.93828e-11	6.32802e-11	8.95121e-11	1.08032e-10	1.46611e-10
0.400995	-3.70422e-11	-6.17313e-12	1.69722e-11	1.08058e-11	2.46931e-11	6.63578e-11	8.95104e-11	1.35805e-10	2.08346e-10	0.0995	-8.49625e-11	-8.9565e-11	-1.01811e-10	-9.72542e-11	-9.2688e-11	-9.41585e-11	-9.41585e-11	-1.11126e-10	-1.03509e-10	0.400995	-3.4e-11	-3.09e-12	1.08e-11	3.4e-11	5.25e-11	6.02e-11	8.18e-11	1.02e-10	1.45e-10	0.0995	-1.65756e-09	-1.64522e-09	-1.67136e-09	-1.63284e-09	-1.62524e-09	-1.61892e-09	-1.64048e-09	-1.6558e-09	-1.67285e-09	0.400995	-2.16093e-11	4.63098e-12	1.543e-11	4.32108e-11	4.78452e-11	6.63623e-11	9.10532e-11	1.11111e-10	1.38899e-10
0.402	-4.62929e-11	-9.25745e-12	1.38912e-11	1.08007e-11	2.31532e-11	6.17302e-11	9.41369e-11	1.3427e-10	2.12973e-10	0.09975	-9.25424e-11	-9.5629e-11	-1.00295e-10	-9.71996e-11	-1.01757e-10	-9.56927e-11	-9.72087e-11	-1.0961e-10	-1.0488e-10	0.402	-3.09e-11	7.71e-12	2.47e-11	4.17e-11	5.56e-11	6.94e-11	8.03e-11	9.88e-11	1.39e-10	0.09975	-1.66971e-09	-1.6512e-09	-1.67132e-09	-1.63588e-09	-1.64188e-09	-1.62507e-09	-1.63893e-09	-1.64214e-09	-1.66679e-09	0.402	-2.31459e-11	4.62872e-12	1.54368e-11	4.01248e-11	5.55537e-11	7.25332e-11	9.10509e-11	1.00316e-10	1.40436e-10
0.403005	-4.01259e-11	-6.17482e-12	1.54295e-11	4.63492e-12	3.24033e-11	5.40183e-11	8.9511e-11	1.43519e-10	2.16057e-10	0.1	-9.10901e-11	-9.26243e-11	-9.56836e-11	-9.26607e-11	-9.4204e-11	-9.87792e-11	-9.73087e-11	-1.14103e-10	-9.58201e-11	0.403005	-2.32e-11	9.26e-12	2.78e-11	3.7e-11	5.86e-11	5.25e-11	8.33e-11	8.49e-11	1.36e-10	0.1	-1.66062e-09	-1.63909e-09	-1.66223e-09	-1.6389e-09	-1.62975e-09	-1.62962e-09	-1.63133e-09	-1.64359e-09	-1.66825e-09	0.403005	-1.54334e-11	1.54891e-12	2.62291e-11	3.54961e-11	5.09317e-11	7.5613e-11	8.33435e-11	9.72263e-11	1.34266e-10
0.40401	-3.55e-11	-7.71754e-12	7.7198e-12	1.23451e-11	2.62392e-11	5.55576e-11	8.64256e-11	1.34268e-10	2.11431e-10	0.10025	-9.5629e-11	-9.41403e-11	-9.11356e-11	-9.87065e-11	-9.72178e-11	-1.03345e-10	-1.10962e-10	-1.01984e-10	-1.09437e-10	0.40401	-2.47e-11	3.09e-12	2.47e-11	3.09e-11	5.09e-11	5.09e-11	6.79e-11	9.72e-11	1.34e-10	0.10025	-1.65902e-09	-1.64667e-09	-1.67291e-09	-1.6313e-09	-1.6251e-09	-1.61901e-09	-1.63734e-09	-1.64353e-09	-1.66365e-09	0.40401	-9.26364e-12	1.38834e-11	1.85239e-11	3.24146e-11	5.55588e-11	5.71054e-11	9.25925e-11	9.2601e-11	1.28095e-10
0.405015	-4.32091e-11	-1.23435e-11	9.25801e-12	1.69716e-11	2.93235e-11	5.55576e-11	8.79649e-11	1.32721e-10	2.09885e-10	0.1005	-9.10901e-11	-9.56654e-11	-1.00241e-10	-9.42131e-11	-9.8761e-11	-9.87883e-11	-9.88975e-11	-1.10989e-10	-1.00386e-10	0.405015	-2.01e-11	9.26e-12	1.7e-11	3.55e-11	5.71e-11	4.94e-11	6.95e-11	9.72e-11	1.33e-10	0.1005	-1.65601e-09	-1.6528e-09	-1.68202e-09	-1.63133e-09	-1.62353e-09	-1.62656e-09	-1.6298e-09	-1.63288e-09	-1.65755e-09	0.405015	-1.38862e-11	9.25801e-12	2.31487e-11	4.4749e-11	6.17251e-11	4.93918e-11	8.95076e-11	9.87679e-11	1.29632e-10
0.40602	-4.32097e-11	-9.26195e-12	6.17482e-12	9.26533e-12	3.54961e-11	5.40115e-11	8.33384e-11	1.28092e-10	2.05256e-10	0.10075	-9.25424e-11	-9.4113e-11	-9.72451e-11	-1.01757e-10	-9.88065e-11	-9.72178e-11	-1.07912e-10	-9.89157e-11	-1.03391e-10	0.40602	-1.39e-11	1.54e-11	2.01e-11	1.54e-11	4.94e-11	4.17e-11	8.02e-11	9.57e-11	1.34e-10	0.10075	-1.66363e-09	-1.6498e-09	-1.66381e-09	-1.64498e-09	-1.62203e-09	-1.6235e-09	-1.63735e-09	-1.63591e-09	-1.6621e-09	0.40602	-9.26252e-12	2.81514e-15	2.62341e-11	4.01248e-11	5.09345e-11	6.01813e-11	7.87125e-11	9.87673e-11	1.20381e-10
0.407025	-3.70399e-11	-1.23412e-11	7.71304e-12	1.69722e-11	4.32069e-11	4.32198e-11	8.17901e-11	1.21922e-10	1.97545e-10	0.101	-8.49534e-11	-8.79854e-11	-9.72542e-11	-9.26789e-11	-1.04934e-10	-9.41312e-11	-9.72996e-11	-1.10989e-10	-1.04916e-10	0.407025	-7.72e-12	6.18e-12	2.62e-11	2.47e-11	5.25e-11	5.56e-11	7.1e-11	1.03e-10	1.28e-10	0.101	-1.66666e-09	-1.65127e-09	-1.67121e-09	-1.63133e-09	-1.62655e-09	-1.61441e-09	-1.6328e-09	-1.64351e-09	-1.66365e-09	0.407025	-1.23418e-11	-1.54497e-12	2.46914e-11	3.39534e-11	5.70975e-11	5.24711e-11	8.17918e-11	9.10588e-11	1.23463e-10
0.40803	-3.39517e-11	-1.55454e-12	-3.37817e-15	1.38941e-11	3.70416e-11	5.40099e-11	6.94517e-11	1.21915e-10	2.03707e-10	0.10125	-8.94649e-11	-8.49898e-11	-1.01829e-10	-9.71996e-11	-1.09473e-10	-8.95923e-11	-9.87428e-11	-1.01948e-10	-1.01884e-10	0.40803	-1.23e-11	6.17e-12	2.16e-11	2.93e-11	5.25e-11	5.86e-11	7.1e-11	1.06e-10	1.33e-10	0.10125	-1.65451e-09	-1.64509e-09	-1.65144e-09	-1.6313e-09	-1.619e-09	-1.62805e-09	-1.62978e-09	-1.63744e-09	-1.66361e-09	0.40803	-3.09276e-12	-7.71079e-12	2.00649e-11	3.08674e-11	5.24728e-11	4.32204e-11	7.87091e-11	9.72285e-11	1.28092e-10
0.409035	-2.93263e-11	-2.15964e-11	-1.69682e-11	2.31453e-11	3.85855e-11	5.0925e-11	6.7905e-11	1.0958e-10	1.92916e-10	0.1015	-8.64148e-11	-1.00232e-10	-1.01857e-10	-9.72269e-11	-9.7336e-11	-9.86974e-11	-9.572e-11	-1.07948e-10	-1.03427e-10	0.409035	-7.72e-12	4.63e-12	2.47e-11	2.01e-11	4.17e-11	7.25e-11	8.02e-11	1.03e-10	1.31e-10	0.1015	-1.66049e-09	-1.63139e-09	-1.6529e-09	-1.63889e-09	-1.62814e-09	-1.62201e-09	-1.63891e-09	-1.63435e-09	-1.656e-09	0.409035	-1.0803e-11	1.5354e-12	2.15998e-11	3.24073e-11	5.09284e-11	5.70953e-11	8.02468e-11	1.08025e-10	1.31179e-10
0.41004	-3.54893e-11	-1.54368e-11	-1.23463e-11	2.16082e-11	4.938e-11	3.85883e-11	6.79033e-11	1.15743e-10	1.95996e-10	0.10175	-8.18668e-11	-1.01848e-10	-1.01839e-10	-9.72178e-11	-1.03445e-10	-9.57109e-11	-9.87338e-11	-1.00313e-10	-1.09546e-10	0.41004	-1.23e-11	6.17e-12	1.08e-11	1.7e-11	4.17e-11	7.25e-11	6.64e-11	1.17e-10	1.34e-10	0.10175	-1.65289e-09	-1.64046e-09	-1.66203e-09	-1.63283e-09	-1.63268e-09	-1.61896e-09	-1.63899e-09	-1.63276e-09	-1.65747e-09	0.41004	-1.85121e-11	-1.07985e-11	6.18045e-12	2.93201e-11	4.93868e-11	5.40161e-11	7.09939e-11	1.04947e-10	1.32724e-10
0.411045	-2.46948e-11	-2.00587e-11	-7.71867e-12	2.62386e-11	4.62968e-11	4.32091e-11	6.48247e-11	1.14205e-10	1.95994e-10	0.102	-8.94377e-11	-1.01857e-10	-9.87974e-11	-9.57018e-11	-1.17162e-10	-9.72269e-11	-9.572e-11	-9.27244e-11	-1.11062e-10	0.411045	-3.09e-12	-9.25e-12	9.26e-12	2.62e-11	3.55e-11	7.1e-11	7.72e-11	1.23e-10	1.47e-10	0.102	-1.65131e-09	-1.64053e-09	-1.65751e-09	-1.63276e-09	-1.61745e-09	-1.62502e-09	-1.64197e-09	-1.62516e-09	-1.65597e-09	0.411045	-6.18271e-12	-1.08064e-11	1.07996e-11	2.00672e-11	5.24671e-11	5.40189e-11	6.94511e-11	1.11116e-10	1.38894e-10
0.41205	-2.00621e-11	-1.38941e-11	-9.25801e-12	3.85759e-11	3.85877e-11	4.01259e-11	8.02451e-11	1.18829e-10	1.86744e-10	0.10225	-8.49261e-11	-1.01793e-10	-1.0035e-10	-9.72178e-11	-1.096e-10	-9.8761e-11	-9.87428e-11	-1.06377e-10	-1.03445e-10	0.41205	-1.39e-11	-6.18e-12	3.09e-12	2.01e-11	4.01e-11	7.41e-11	8.49e-11	1.1e-10	1.47e-10	0.10225	-1.64974e-09	-1.64351e-09	-1.65742e-09	-1.62672e-09	-1.61737e-09	-1.62202e-09	-1.63135e-09	-1.63116e-09	-1.65904e-09	0.41205	-2.00537e-11	-2.00548e-11	6.17876e-12	2.31481e-11	4.32142e-11	6.48123e-11	7.71586e-11	1.17283e-10	1.41979e-10
0.413055	-1.38946e-11	-2.00638e-11	-6.17876e-12	3.39511e-11	4.6294e-11	3.85888e-11	8.02491e-11	1.12669e-10	1.95998e-10	0.1025	-8.79399e-11	-9.11629e-11	-1.0793e-10	-9.71905e-11	-1.06505e-10	-9.87792e-11	-9.72633e-11	-1.01857e-10	-1.03418e-10	0.413055	-1.24e-11	-1.08e-11	7.71e-12	2.47e-11	4.01e-11	6.64e-11	8.95e-11	1.16e-10	1.57e-10	0.1025	-1.64363e-09	-1.63131e-09	-1.64671e-09	-1.63732e-09	-1.61891e-09	-1.62355e-09	-1.63739e-09	-1.6221e-09	-1.6636e-09	0.413055	-9.26702e-12	-7.72092e-12	1.69677e-11	2.31487e-11	4.01237e-11	6.0192e-11	6.94556e-11	1.04952e-10	1.35813e-10
0.41406	-2.16026e-11	-2.93151e-11	-1.85104e-11	2.62403e-11	4.16687e-11	5.55526e-11	7.56243e-11	1.32713e-10	2.06798e-10	0.10275	-8.64421e-11	-9.87065e-11	-9.88338e-11	-9.11083e-11	-1.0645e-10	-1.00286e-10	-1.01839e-10	-9.73087e-11	-1.06468e-10	0.41406	-2.78e-11	-2.16e-11	6.17e-12	2.93e-11	3.7e-11	8.02e-11	9.11e-11	1.25e-10	1.5e-10	0.10275	-1.64363e-09	-1.62823e-09	-1.64053e-09	-1.63126e-09	-1.6219e-09	-1.62813e-09	-1.6374e-09	-1.63116e-09	-1.65758e-09	0.41406	-1.8516e-11	-7.71585e-12	4.63267e-12	2.16088e-11	3.24095e-11	6.63584e-11	8.33294e-11	1.17283e-10	1.41983e-10
0.415065	-2.00661e-11	-1.85262e-11	-6.17144e-12	3.08606e-11	3.70349e-11	5.71004e-11	8.02536e-11	1.26552e-10	2.11426e-10	0.103	-8.80036e-11	-9.57291e-11	-1.00341e-10	-9.40766e-11	-1.00359e-10	-9.7236e-11	-1.03355e-10	-1.06423e-10	-1.06459e-10	0.415065	-3.4e-11	-2.78e-11	-4.62e-12	3.24e-11	4.17e-11	8.02e-11	9.41e-11	1.14e-10	1.54e-10	0.103	-1.64976e-09	-1.63585e-09	-1.63744e-09	-1.62663e-09	-1.60977e-09	-1.6266e-09	-1.63284e-09	-1.62515e-09	-1.66663e-09	0.415065	-1.85205e-11	-6.17426e-12	5.06726e-15	2.77752e-11	2.62381e-11	6.48168e-11	7.5626e-11	1.1112e-10	1.49697e-10
0.41607	-2.77774e-11	-2.62324e-11	1.07957e-11	2.16088e-11	2.16133e-11	5.55599e-11	9.25914e-11	1.28095e-10	2.06803e-10	0.10325	-9.56654e-11	-1.00232e-10	-1.06396e-10	-8.65331e-11	-1.01802e-10	-9.57382e-11	-9.73269e-11	-1.04971e-10	-1.01857e-10	0.41607	-3.4e-11	-2.32e-11	7.71e-12	3.09e-11	4.48e-11	7.56e-11	1.02e-10	1.2e-10	1.54e-10	0.10325	-1.65429e-09	-1.63895e-09	-1.63747e-09	-1.62363e-09	-1.61885e-09	-1.62197e-09	-1.63591e-09	-1.63116e-09	-1.65598e-09	0.41607	-2.16071e-11	-7.71135e-12	9.25576e-12	2.31532e-11	2.62375e-11	6.01943e-11	8.17923e-11	1.15743e-10	1.54324e-10
0.417075	-3.0864e-11	-2.46914e-11	7.71754e-12	2.00621e-11	2.62347e-11	5.86459e-11	8.95116e-11	1.37349e-10	2.09882e-10	0.1035	-1.00259e-10	-9.11356e-11	-9.73451e-11	-9.71268e-11	-9.42677e-11	-1.033e-10	-1.07975e-10	-1.07975e-10	-9.73178e-11	0.417075	-3.86e-11	-2.31e-11	7.72e-12	3.55e-11	4.63e-11	7.1e-11	8.49e-11	1.23e-10	1.47e-10	0.1035	-1.64063e-09	-1.63892e-09	-1.64508e-09	-1.63723e-09	-1.6189e-09	-1.61442e-09	-1.64344e-09	-1.62207e-09	-1.65135e-09	0.417075	-2.77752e-11	4.62197e-12	7.71585e-12	2.93207e-11	3.08657e-11	7.25298e-11	8.33396e-11	1.11121e-10	1.46618e-10
0.41808	-2.93252e-11	-2.0061e-11	7.71585e-12	1.69744e-11	2.7778e-11	6.48162e-11	8.95104e-11	1.37348e-10	2.00638e-10	0.10375	-9.56836e-11	-9.56745e-11	-1.07966e-10	-9.11083e-11	-1.07902e-10	-9.42313e-11	-1.09555e-10	-1.01902e-10	-1.07966e-10	0.41808	-3.7e-11	-1.7e-11	1.08e-11	4.17e-11	6.02e-11	6.95e-11	9.72e-11	1.2e-10	1.56e-10	0.10375	-1.64663e-09	-1.63131e-09	-1.64202e-09	-1.61911e-09	-1.61736e-09	-1.63106e-09	-1.6252e-09	-1.62663e-09	-1.65284e-09	0.41808	-2.31515e-11	-4.62253e-12	4.63041e-12	3.08674e-11	3.54961e-11	7.25338e-11	9.10481e-11	1.20371e-10	1.55864e-10
0.419085	-3.54927e-11	-1.08081e-11	6.17651e-12	9.26589e-12	2.62353e-11	6.63612e-11	8.95127e-11	1.2656e-10	2.22221e-10	0.104	-9.10992e-11	-9.87883e-11	-1.08039e-10	-9.4113e-11	-1.00368e-10	-1.00286e-10	-1.08075e-10	-1.03445e-10	-1.0803e-10	0.419085	-3.7e-11	-7.72e-12	1.7e-11	3.55e-11	5.86e-11	7.87e-11	8.64e-11	1.17e-10	1.5e-10	0.104	-1.64359e-09	-1.63278e-09	-1.63288e-09	-1.63574e-09	-1.61583e-09	-1.61595e-09	-1.62807e-09	-1.63269e-09	-1.65135e-09	0.419085	-2.46931e-11	6.16976e-12	3.08995e-12	3.70388e-11	4.16681e-11	7.09888e-11	8.33418e-11	1.15745e-10	1.4507e-10
0.42009	-3.39551e-11	-1.54278e-11	1.38845e-11	1.85149e-11	2.31504e-11	6.79e-11	9.56802e-11	1.4506e-10	2.11435e-10	0.10425	-9.4113e-11	-1.04907e-10	-1.09528e-10	-9.26152e-11	-1.01839e-10	-1.01766e-10	-1.14103e-10	-1.1256e-10	-1.08057e-10	0.42009	-3.09e-11	-4.63e-12	2.47e-11	4.63e-11	5.71e-11	6.33e-11	8.95e-11	1.06e-10	1.42e-10	0.10425	-1.63901e-09	-1.63281e-09	-1.63888e-09	-1.62973e-09	-1.61585e-09	-1.62193e-09	-1.61591e-09	-1.62208e-09	-1.65595e-09	0.42009	-2.77752e-11	7.71473e-12	1.08007e-11	4.32091e-11	4.62996e-11	6.32802e-11	8.79666e-11	1.06489e-10	1.38895e-10
0.421095	-4.01237e-11	-6.17876e-12	7.72092e-12	1.54306e-11	2.31487e-11	5.71071e-11	9.25976e-11	1.38894e-10	2.16059e-10	0.1045	-9.26061e-11	-1.04852e-10	-1.03491e-10	-9.41221e-11	-1.00313e-10	-8.80582e-11	-1.03473e-10	-1.05034e-10	-1.12605e-10	0.421095	-2.78e-11	-1.54e-12	2.78e-11	5.09e-11	6.48e-11	6.48e-11	9.11e-11	1e-10	1.44e-10	0.1045	-1.64202e-09	-1.63582e-09	-1.62972e-09	-1.62666e-09	-1.62194e-09	-1.61743e-09	-1.61897e-09	-1.62655e-09	-1.66202e-09	0.421095	-2.00666e-11	4.6321e-12	1.23474e-11	4.16664e-11	5.40121e-11	7.09888e-11	9.10526e-11	1.04943e-10	1.31185e-10
0.4221	-4.16709e-11	-1.23423e-11	1.38862e-11	6.17595e-12	2.16093e-11	6.17297e-11	9.10526e-11	1.28102e-10	2.19143e-10	0.10475	-9.26061e-11	-8.9656e-11	-1.12605e-10	-9.26152e-11	-9.88611e-11	-8.9565e-11	-1.04943e-10	-1.12641e-10	-1.08057e-10	0.4221	-2.62e-11	1.55e-12	2.32e-11	4.32e-11	6.48e-11	6.02e-11	8.95e-11	1.06e-10	1.39e-10	0.10475	-1.63893e-09	-1.62821e-09	-1.62201e-09	-1.62967e-09	-1.61891e-09	-1.62502e-09	-1.63267e-09	-1.61892e-09	-1.65137e-09	0.4221	-2.31481e-11	7.71529e-12	1.69761e-11	3.39562e-11	5.40161e-11	7.25315e-11	9.1056e-11	1.01858e-10	1.40433e-10
0.423105	-4.93811e-11	-7.71867e-12	1.08058e-11	4.63548e-12	2.93196e-11	6.17291e-11	8.64273e-11	1.41974e-10	2.12973e-10	0.105	-9.41403e-11	-9.87338e-11	-1.12614e-10	-9.41312e-11	-1.12569e-10	-1.00232e-10	-1.06441e-10	-1.1718e-10	-1.08057e-10	0.423105	-1.7e-11	1.23e-11	2.93e-11	3.86e-11	5.71e-11	5.86e-11	7.25e-11	9.57e-11	1.2e-10	0.105	-1.62977e-09	-1.62811e-09	-1.61736e-09	-1.62662e-09	-1.61739e-09	-1.62353e-09	-1.62512e-09	-1.6143e-09	-1.64986e-09	0.423105	-2.31481e-11	7.71698e-12	2.16054e-11	3.70366e-11	5.70987e-11	6.63618e-11	9.72235e-11	1.01857e-10	1.34267e-10
0.42411	-4.62979e-11	-9.25576e-12	1.54295e-11	1.85115e-11	2.93263e-11	5.55605e-11	9.10503e-11	1.32727e-10	2.06807e-10	0.10525	-9.56563e-11	-1.01784e-10	-1.04961e-10	-9.41403e-11	-1.11062e-10	-9.72723e-11	-1.00359e-10	-1.03509e-10	-1.12596e-10	0.42411	-1.85e-11	1.39e-11	2.47e-11	3.7e-11	5.56e-11	5.71e-11	7.41e-11	9.26e-11	1.34e-10	0.10525	-1.63125e-09	-1.61902e-09	-1.61278e-09	-1.62352e-09	-1.62036e-09	-1.622e-09	-1.62503e-09	-1.61427e-09	-1.66351e-09	0.42411	-2.00627e-11	9.25576e-12	2.46914e-11	3.39551e-11	5.24739e-11	6.17297e-11	9.41392e-11	1.01853e-10	1.31179e-10
0.425115	-4.16698e-11	-6.19332e-15	1.08052e-11	1.08047e-11	4.01197e-11	5.55605e-11	8.64256e-11	1.3735e-10	2.20681e-10	0.1055	-9.26425e-11	-9.26789e-11	-1.00332e-10	-9.41312e-11	-1.00423e-10	-1.01884e-10	-1.01848e-10	-1.08003e-10	-1.06541e-10	0.425115	-1.08e-11	1.39e-11	2.62e-11	3.55e-11	5.56e-11	6.02e-11	6.64e-11	8.95e-11	1.3e-10	0.1055	-1.63275e-09	-1.62962e-09	-1.61589e-09	-1.61742e-09	-1.6082e-09	-1.62204e-09	-1.61746e-09	-1.61271e-09	-1.65289e-09	0.425115	-1.69767e-11	4.50423e-15	2.4692e-11	3.8581e-11	5.40115e-11	5.2475e-11	8.7966e-11	9.10605e-11	1.26551e-10
0.42612	-4.01259e-11	-7.71191e-12	1.23446e-11	7.71923e-12	3.55017e-11	6.17246e-11	8.64211e-11	1.35805e-10	2.11433e-10	0.10575	-9.71814e-11	-9.72269e-11	-9.8761e-11	-9.25879e-11	-1.07966e-10	-1.11025e-10	-1.01829e-10	-1.08021e-10	-1.09519e-10	0.42612	-6.18e-12	1.54e-11	2.62e-11	3.24e-11	4.94e-11	5.09e-11	7.56e-11	1.05e-10	1.23e-10	0.10575	-1.62664e-09	-1.62521e-09	-1.63107e-09	-1.62197e-09	-1.61269e-09	-1.6296e-09	-1.62654e-09	-1.60817e-09	-1.64826e-09	0.42612	-1.54306e-11	3.08657e-12	2.31509e-11	4.01237e-11	4.63041e-11	5.24728e-11	7.8712e-11	9.87679e-11	1.28092e-10
0.427125	-4.01248e-11	-3.08938e-12	9.25689e-12	1.2348e-11	4.78367e-11	4.93879e-11	7.87108e-11	1.23467e-10	2.09889e-10	0.106	-9.41767e-11	-1.01802e-10	-9.57018e-11	-8.95468e-11	-1.04952e-10	-1.04934e-10	-9.7236e-11	-1.06505e-10	-1.03482e-10	0.427125	-9.26e-12	7.72e-12	2.31e-11	2.62e-11	4.32e-11	6.02e-11	7.56e-11	1.03e-10	1.36e-10	0.106	-1.62353e-09	-1.64348e-09	-1.61595e-09	-1.62353e-09	-1.61117e-09	-1.61895e-09	-1.62202e-09	-1.61424e-09	-1.64978e-09	0.427125	-7.72092e-12	6.16694e-12	2.62308e-11	3.70371e-11	5.40115e-11	5.55582e-11	8.17918e-11	1.00313e-10	1.28096e-10
0.42813	-3.85804e-11	-6.17313e-12	-1.53709e-12	2.16043e-11	4.62991e-11	4.47563e-11	8.02485e-11	1.23459e-10	2.16056e-10	0.10625	-9.71814e-11	-9.72542e-11	-9.572e-11	-9.25606e-11	-1.03373e-10	-9.72451e-11	-9.41676e-11	-1.08003e-10	-1.11062e-10	0.42813	-1.23e-11	7.71e-12	6.18e-12	3.24e-11	5.09e-11	4.79e-11	7.41e-11	9.41e-11	1.39e-10	0.10625	-1.61901e-09	-1.64204e-09	-1.62195e-09	-1.62505e-09	-1.60661e-09	-1.61582e-09	-1.62201e-09	-1.61428e-09	-1.65283e-09	0.42813	-1.23451e-11	-7.70741e-12	1.54373e-11	2.93241e-11	5.24728e-11	5.86425e-11	7.87069e-11	1.00316e-10	1.38888e-10
0.429135	-3.2409e-11	-9.26139e-12	4.62591e-12	2.6233e-11	4.62974e-11	4.32125e-11	7.56231e-11	1.12664e-10	2.1297e-10	0.1065	-9.26334e-11	-9.72633e-11	-1.01738e-10	-8.9565e-11	-9.72906e-11	-9.26789e-11	-9.56836e-11	-1.04925e-10	-1.09555e-10	0.429135	-7.72e-12	1.54e-12	1.39e-11	2.31e-11	4.63e-11	6.17e-11	7.1e-11	1.1e-10	1.34e-10	0.1065	-1.63266e-09	-1.63741e-09	-1.62041e-09	-1.62195e-09	-1.61114e-09	-1.61278e-09	-1.62505e-09	-1.61573e-09	-1.65132e-09	0.429135	-1.3889e-11	3.08094e-12	1.69767e-11	2.62369e-11	5.40138e-11	5.55599e-11	7.40787e-11	1.06485e-10	1.29643e-10
0.43014	-2.62381e-11	-1.69722e-11	0	2.31526e-11	4.32153e-11	4.32142e-11	7.71625e-11	1.12659e-10	2.00634e-10	0.10675	-9.4113e-11	-1.03327e-10	-8.80854e-11	-9.5629e-11	-1.01866e-10	-1.01784e-10	-9.71996e-11	-9.88065e-11	-1.04971e-10	0.43014	-1.23e-11	-4.63e-12	3.09e-12	1.08e-11	3.24e-11	6.64e-11	8.18e-11	1.13e-10	1.44e-10	0.10675	-1.62356e-09	-1.6313e-09	-1.61277e-09	-1.61122e-09	-1.60812e-09	-1.61732e-09	-1.62352e-09	-1.60208e-09	-1.6513e-09	0.43014	-1.3885e-11	-1.54554e-12	2.00587e-11	2.62347e-11	5.24705e-11	5.71009e-11	7.25343e-11	1.09576e-10	1.38893e-10
0.431145	-2.62341e-11	-1.38929e-11	-4.62929e-12	2.93213e-11	4.93828e-11	4.93828e-11	7.40782e-11	1.11116e-10	2.0834e-10	0.107	-9.10537e-11	-9.72815e-11	-9.41312e-11	-9.26334e-11	-1.07975e-10	-9.88247e-11	-9.41767e-11	-9.87701e-11	-1.04961e-10	0.431145	-1.23e-11	-1.54e-12	1.08e-11	2.31e-11	2.93e-11	7.25e-11	8.03e-11	1.22e-10	1.47e-10	0.107	-1.61886e-09	-1.63277e-09	-1.61123e-09	-1.60666e-09	-1.60808e-09	-1.61582e-09	-1.61891e-09	-1.61417e-09	-1.64823e-09	0.431145	-1.55117e-12	-1.23389e-11	1.23502e-11	2.31487e-11	4.78401e-11	5.71015e-11	7.0991e-11	1.2037e-10	1.41984e-10
0.43215	-2.16082e-11	-2.00627e-11	-7.71698e-12	3.24078e-11	4.93839e-11	4.93845e-11	7.25383e-11	1.08034e-10	2.06801e-10	0.10725	-8.80127e-11	-1.00241e-10	-9.87247e-11	-9.56745e-11	-1.04961e-10	-1.04925e-10	-9.72269e-11	-9.88429e-11	-1.07966e-10	0.43215	-1.7e-11	-1.55e-12	-1.54e-12	1.39e-11	2.93e-11	7.87e-11	8.95e-11	1.22e-10	1.48e-10	0.10725	-1.60663e-09	-1.6297e-09	-1.61729e-09	-1.6188e-09	-1.60508e-09	-1.61434e-09	-1.61583e-09	-1.60968e-09	-1.64517e-09	0.43215	-1.08007e-11	-3.08995e-12	1.54295e-11	1.85245e-11	3.8586e-11	5.71049e-11	6.94517e-11	1.14206e-10	1.51234e-10
0.433155	-2.31487e-11	-2.62341e-11	-1.23401e-11	3.2409e-11	4.62991e-11	4.78418e-11	8.17867e-11	1.17286e-10	2.08342e-10	0.1075	-9.26061e-11	-9.11629e-11	-9.56654e-11	-9.7236e-11	-1.0498e-10	-1.08021e-10	-1.00295e-10	-1.11016e-10	-1.00404e-10	0.433155	-2.47e-11	-1.08e-11	6.17e-12	2.93e-11	3.55e-11	8.03e-11	8.49e-11	1.25e-10	1.51e-10	0.1075	-1.60662e-09	-1.62513e-09	-1.61131e-09	-1.61432e-09	-1.61261e-09	-1.6234e-09	-1.61433e-09	-1.61118e-09	-1.64667e-09	0.433155	-1.38941e-11	-3.08938e-12	9.26139e-12	2.77723e-11	4.01231e-11	6.63595e-11	7.87024e-11	1.17291e-10	1.38901e-10
0.43416	-2.31515e-11	-2.77774e-11	-6.19332e-15	3.24118e-11	4.47502e-11	4.63002e-11	7.10012e-11	1.17291e-10	2.06801e-10	0.10775	-9.87155e-11	-1.00241e-10	-8.95923e-11	-1.00341e-10	-1.11071e-10	-1.09519e-10	-1.00286e-10	-1.06496e-10	-1.08039e-10	0.43416	-2.47e-11	-2.01e-11	1.55e-12	2.78e-11	3.86e-11	8.02e-11	9.57e-11	1.2e-10	1.64e-10	0.10775	-1.61728e-09	-1.62972e-09	-1.625e-09	-1.61733e-09	-1.60051e-09	-1.60976e-09	-1.62189e-09	-1.61112e-09	-1.64511e-09	0.43416	-2.93151e-11	-1.0799e-11	7.71529e-12	1.85256e-11	3.54944e-11	7.09916e-11	7.40821e-11	1.23458e-10	1.40443e-10
0.435165	-2.9319e-11	-2.46925e-11	-4.62422e-12	4.01169e-11	2.93269e-11	4.93907e-11	8.79615e-11	1.21918e-10	2.08345e-10	0.108	-9.57473e-11	-9.72542e-11	-9.71359e-11	-1.07939e-10	-1.0961e-10	-1.01957e-10	-9.57291e-11	-1.03409e-10	-1.17153e-10	0.435165	-3.09e-11	-2.62e-11	1.39e-11	2.93e-11	3.55e-11	7.41e-11	8.95e-11	1.25e-10	1.56e-10	0.108	-1.61427e-09	-1.63584e-09	-1.62501e-09	-1.61584e-09	-1.6096e-09	-1.61575e-09	-1.6128e-09	-1.59894e-09	-1.63908e-09	0.435165	-2.46965e-11	-7.71698e-12	3.08882e-12	2.62302e-11	2.77836e-11	7.71608e-11	8.17923e-11	1.1729e-10	1.52779e-10
0.43617	-2.62375e-11	-2.16043e-11	6.17032e-12	2.46976e-11	2.62358e-11	6.78921e-11	8.95144e-11	1.23468e-10	2.14516e-10	0.10825	-1.03345e-10	-9.87155e-11	-8.96196e-11	-1.00359e-10	-1.14121e-10	-1.11044e-10	-9.87338e-11	-1.01857e-10	-1.03455e-10	0.43617	-2.93e-11	-1.85e-11	4.63e-12	3.24e-11	3.55e-11	7.87e-11	9.72e-11	1.19e-10	1.53e-10	0.10825	-1.60962e-09	-1.63429e-09	-1.61439e-09	-1.61733e-09	-1.6112e-09	-1.61121e-09	-1.61429e-09	-1.60342e-09	-1.65115e-09	0.43617	-3.08623e-11	-6.17201e-12	4.62929e-12	1.85273e-11	3.24073e-11	7.40776e-11	8.48789e-11	1.12661e-10	1.48156e-10
0.437175	-2.77797e-11	-1.38946e-11	9.26026e-12	2.31493e-11	2.31515e-11	5.24784e-11	1.0185e-10	1.38889e-10	2.20687e-10	0.1085	-1.01848e-10	-9.11356e-11	-1.00295e-10	-1.00304e-10	-1.04961e-10	-1.08003e-10	-9.57018e-11	-1.00304e-10	-9.87974e-11	0.437175	-4.17e-11	-2.31e-11	9.26e-12	4.01e-11	4.63e-11	8.18e-11	1e-10	1.13e-10	1.57e-10	0.1085	-1.60055e-09	-1.62513e-09	-1.62349e-09	-1.61437e-09	-1.6142e-09	-1.60972e-09	-1.61889e-09	-1.59883e-09	-1.63601e-09	0.437175	-2.77825e-11	-1.54666e-12	4.63098e-12	3.24039e-11	3.24135e-11	7.09939e-11	8.33407e-11	1.11119e-10	1.4507e-10
0.43818	-3.08651e-11	-2.00565e-11	1.38839e-11	2.16043e-11	2.62341e-11	5.55588e-11	9.56841e-11	1.3581e-10	2.19147e-10	0.10875	-9.87883e-11	-9.72178e-11	-1.0793e-10	-9.87883e-11	-9.88884e-11	-1.0035e-10	-9.56745e-11	-9.72996e-11	-9.88065e-11	0.43818	-4.17e-11	-1.54e-11	7.72e-12	5.09e-11	5.09e-11	8.03e-11	9.57e-11	1.22e-10	1.54e-10	0.10875	-1.61878e-09	-1.62509e-09	-1.62501e-09	-1.6265e-09	-1.60513e-09	-1.62034e-09	-1.62043e-09	-1.59274e-09	-1.642e-09	0.43818	-3.39489e-11	-6.16694e-12	7.71585e-12	3.24084e-11	4.47524e-11	7.56186e-11	9.10481e-11	1.15742e-10	1.46609e-10
0.439185	-3.24123e-11	-9.26252e-12	3.09332e-12	1.54345e-11	2.46954e-11	6.01897e-11	9.10543e-11	1.34265e-10	2.19147e-10	0.109	-9.87155e-11	-1.01829e-10	-9.88156e-11	-1.00304e-10	-1.12505e-10	-9.8852e-11	-9.42131e-11	-1.0635e-10	-1.04852e-10	0.439185	-3.55e-11	-4.63e-12	1.39e-11	4.17e-11	5.09e-11	7.72e-11	9.41e-11	1.11e-10	1.6e-10	0.109	-1.61578e-09	-1.62658e-09	-1.61588e-09	-1.61896e-09	-1.61569e-09	-1.6127e-09	-1.6189e-09	-1.59879e-09	-1.63905e-09	0.439185	-3.08679e-11	6.16638e-12	9.25745e-12	3.08674e-11	4.93851e-11	7.40765e-11	8.33413e-11	1.08032e-10	1.38899e-10
0.44019	-4.32063e-11	-6.17708e-12	1.08024e-11	1.38873e-11	3.08606e-11	6.94416e-11	8.797e-11	1.29637e-10	2.2069e-10	0.10925	-8.96287e-11	-1.01839e-10	-9.72178e-11	-1.00323e-10	-1.00414e-10	-1.10989e-10	-1.04861e-10	-9.27972e-11	-9.57655e-11	0.44019	-4.17e-11	-1.54e-12	2.16e-11	3.55e-11	5.86e-11	6.94e-11	8.49e-11	1.06e-10	1.47e-10	0.10925	-1.60657e-09	-1.62048e-09	-1.61736e-09	-1.62042e-09	-1.60508e-09	-1.60049e-09	-1.6174e-09	-1.59577e-09	-1.64967e-09	0.44019	-3.39477e-11	3.37817e-15	4.63379e-12	3.39545e-11	5.40104e-11	6.94506e-11	8.64233e-11	1.06487e-10	1.41979e-10
0.441195	-3.8586e-11	-1.38862e-11	1.69722e-11	6.17651e-12	2.31538e-11	6.17342e-11	9.25942e-11	1.28093e-10	2.23777e-10	0.1095	-1.00259e-10	-9.88156e-11	-9.41767e-11	-1.01839e-10	-1.04898e-10	-1.01966e-10	-1.01902e-10	-1.12469e-10	-1.00277e-10	0.441195	-3.86e-11	-2.82e-15	2.16e-11	4.01e-11	6.02e-11	6.33e-11	8.33e-11	1.14e-10	1.5e-10	0.1095	-1.59896e-09	-1.62042e-09	-1.61884e-09	-1.61737e-09	-1.60501e-09	-1.60508e-09	-1.62194e-09	-1.59574e-09	-1.64367e-09	0.441195	-2.46954e-11	3.08713e-12	1.08002e-11	4.32052e-11	4.63036e-11	7.25309e-11	8.79694e-11	1.04942e-10	1.35811e-10
0.4422	-4.47507e-11	-1.23435e-11	1.23491e-11	7.71754e-12	2.77785e-11	6.17308e-11	8.95127e-11	1.28092e-10	2.29946e-10	0.10975	-1.01866e-10	-1.03309e-10	-9.71996e-11	-1.00332e-10	-1.01902e-10	-1.11044e-10	-1.06441e-10	-1.00341e-10	-9.87883e-11	0.4422	-2.62e-11	-6.17e-12	2.16e-11	4.78e-11	6.48e-11	6.48e-11	8.49e-11	9.42e-11	1.33e-10	0.10975	-1.61112e-09	-1.61591e-09	-1.60974e-09	-1.61583e-09	-1.60501e-09	-1.6203e-09	-1.61732e-09	-1.59264e-09	-1.64975e-09	0.4422	-2.31481e-11	7.71473e-12	9.26364e-12	3.39584e-11	5.24694e-11	6.63618e-11	9.5678e-11	9.87701e-11	1.35806e-10
0.443205	-3.85843e-11	-3.09276e-12	1.54306e-11	1.23451e-11	3.0864e-11	6.01875e-11	9.25942e-11	1.26553e-10	2.28407e-10	0.11	-1.0487e-10	-9.26971e-11	-9.56381e-11	-1.01866e-10	-1.06432e-10	-1.08021e-10	-1.03355e-10	-9.27153e-11	-1.00295e-10	0.443205	-3.24e-11	4.63e-12	2.47e-11	3.86e-11	5.25e-11	5.25e-11	7.25e-11	1.05e-10	1.39e-10	0.11	-1.61266e-09	-1.62655e-09	-1.61579e-09	-1.61585e-09	-1.60349e-09	-1.61119e-09	-1.6067e-09	-1.58509e-09	-1.65282e-09	0.443205	-1.85217e-11	7.71698e-12	1.85183e-11	4.16681e-11	5.24733e-11	6.17302e-11	8.79711e-11	9.25987e-11	1.28097e-10
0.44421	-3.85815e-11	-1.07974e-11	1.23468e-11	1.38918e-11	2.93241e-11	5.70998e-11	8.79694e-11	1.35804e-10	2.28405e-10	0.11025	-9.572e-11	-9.87065e-11	-8.64603e-11	-1.04925e-10	-1.01893e-10	-1.03418e-10	-9.27244e-11	-1.04843e-10	-9.88156e-11	0.44421	-2.32e-11	1.23e-11	2.32e-11	4.78e-11	5.4e-11	5.56e-11	8.33e-11	9.41e-11	1.37e-10	0.11025	-1.60204e-09	-1.62518e-09	-1.61732e-09	-1.62041e-09	-1.60498e-09	-1.602e-09	-1.62029e-09	-1.60027e-09	-1.64973e-09	0.44421	-2.00621e-11	9.25576e-12	2.46914e-11	4.7835e-11	5.70981e-11	5.402e-11	9.10498e-11	9.10537e-11	1.32718e-10
0.445215	-3.70377e-11	-3.09163e-12	1.08019e-11	2.16015e-11	3.24095e-11	4.9389e-11	8.95082e-11	1.3272e-10	2.26858e-10	0.1105	-9.26425e-11	-9.41494e-11	-8.33828e-11	-1.04952e-10	-1.03382e-10	-1.01802e-10	-1.03327e-10	-1.00332e-10	-1.04907e-10	0.445215	-1.85e-11	9.26e-12	2.62e-11	3.55e-11	4.78e-11	5.56e-11	6.64e-11	9.88e-11	1.31e-10	0.1105	-1.60964e-09	-1.64036e-09	-1.61276e-09	-1.61886e-09	-1.60043e-09	-1.60496e-09	-1.60816e-09	-1.59584e-09	-1.64049e-09	0.445215	-2.00604e-11	2.25211e-15	2.7774e-11	3.55006e-11	5.2475e-11	6.01824e-11	8.33407e-11	8.95093e-11	1.26552e-10
0.44622	-3.2414e-11	-9.25238e-12	6.1737e-12	1.69795e-11	3.70349e-11	5.24716e-11	8.4884e-11	1.2347e-10	2.1298e-10	0.11075	-9.72269e-11	-9.11174e-11	-8.79581e-11	-1.06459e-10	-1.01884e-10	-9.11811e-11	-1.01848e-10	-9.88247e-11	-1.04943e-10	0.44622	-1.39e-11	1.39e-11	2.47e-11	3.55e-11	5.09e-11	5.71e-11	7.41e-11	1.05e-10	1.28e-10	0.11075	-1.6157e-09	-1.62975e-09	-1.61277e-09	-1.60976e-09	-1.60347e-09	-1.5989e-09	-1.60511e-09	-1.60492e-09	-1.62824e-09	0.44622	-1.38929e-11	-3.08657e-12	1.69823e-11	3.70349e-11	5.70964e-11	5.09323e-11	8.4875e-11	8.48874e-11	1.28089e-10
0.447225	-4.16619e-11	4.62084e-12	3.08713e-12	2.16054e-11	3.08713e-11	5.5556e-11	8.95026e-11	1.34257e-10	2.17605e-10	0.111	-1.01839e-10	-9.86883e-11	-9.10082e-11	-1.03436e-10	-1.04907e-10	-1.01811e-10	-9.87428e-11	-1.0645e-10	-1.04925e-10	0.447225	-7.72e-12	1.55e-12	3.39e-11	3.09e-11	4.32e-11	5.25e-11	7.1e-11	1.06e-10	1.37e-10	0.111	-1.60202e-09	-1.62666e-09	-1.61879e-09	-1.62039e-09	-1.6065e-09	-1.60191e-09	-1.61726e-09	-1.59886e-09	-1.62831e-09	0.447225	-1.69722e-11	-6.17144e-12	2.31447e-11	2.77825e-11	4.7848e-11	5.24688e-11	7.09984e-11	9.87685e-11	1.18841e-10
0.44823	-3.24129e-11	-6.16976e-12	1.54385e-12	2.46942e-11	4.01203e-11	5.2466e-11	7.25428e-11	1.21922e-10	2.26851e-10	0.11125	-1.03373e-10	-9.26789e-11	-8.64876e-11	-1.06414e-10	-1.01839e-10	-1.04889e-10	-9.11538e-11	-1.07966e-10	-1.01866e-10	0.44823	-2.31e-11	4.5e-15	1.08e-11	2.01e-11	4.01e-11	6.48e-11	6.95e-11	1e-10	1.37e-10	0.11125	-1.60352e-09	-1.62963e-09	-1.60513e-09	-1.62196e-09	-1.60044e-09	-1.60195e-09	-1.61271e-09	-1.59581e-09	-1.6526e-09	0.44823	-9.26364e-12	-4.63379e-12	1.69812e-11	2.77785e-11	5.55554e-11	4.63047e-11	7.71614e-11	1.08023e-10	1.32718e-10
0.449235	-3.39522e-11	-7.71811e-12	1.54159e-12	3.24033e-11	3.55028e-11	3.39629e-11	7.87069e-11	1.17294e-10	2.05263e-10	0.1115	-1.00323e-10	-1.00295e-10	-9.25788e-11	-9.73178e-11	-9.57746e-11	-9.87974e-11	-1.00232e-10	-9.87974e-11	-1.00332e-10	0.449235	-6.18e-12	1.08e-11	1.08e-11	1.54e-11	4.32e-11	6.33e-11	7.41e-11	1.11e-10	1.31e-10	0.1115	-1.61265e-09	-1.61899e-09	-1.61118e-09	-1.61889e-09	-1.60344e-09	-1.60495e-09	-1.60506e-09	-1.60186e-09	-1.6345e-09	0.449235	-1.23451e-11	-1.38845e-11	2.46863e-11	2.62358e-11	5.55548e-11	5.70964e-11	7.56226e-11	9.87741e-11	1.34267e-10
0.45024	-3.54927e-11	-1.38907e-11	-3.08826e-12	2.46965e-11	5.09182e-11	4.47518e-11	8.33345e-11	1.25001e-10	2.02173e-10	0.11175	-9.87792e-11	-1.04898e-10	-9.56654e-11	-1.03418e-10	-1.04898e-10	-9.72542e-11	-9.57746e-11	-9.42586e-11	-1.01839e-10	0.45024	-1.08e-11	1.54e-12	7.71e-12	1.54e-11	3.86e-11	6.17e-11	7.87e-11	1.13e-10	1.39e-10	0.11175	-1.60814e-09	-1.62201e-09	-1.61572e-09	-1.61277e-09	-1.60035e-09	-1.59743e-09	-1.605e-09	-1.5973e-09	-1.64356e-09	0.45024	-1.2348e-11	-9.26026e-12	1.54334e-11	2.46942e-11	4.62991e-11	5.40189e-11	7.87024e-11	1.00316e-10	1.40438e-10
0.451245	-2.93207e-11	-2.31447e-11	-1.23406e-11	2.77785e-11	3.85888e-11	4.62996e-11	8.02491e-11	1.18836e-10	2.06798e-10	0.112	-9.87519e-11	-1.01866e-10	-9.56563e-11	-1.12587e-10	-1.06432e-10	-1.00313e-10	-1.06414e-10	-1.09418e-10	-1.00368e-10	0.451245	-1.39e-11	-9.25e-12	1.69e-15	2.16e-11	4.01e-11	6.79e-11	8.33e-11	1.13e-10	1.45e-10	0.112	-1.60971e-09	-1.62809e-09	-1.60357e-09	-1.61274e-09	-1.59125e-09	-1.61102e-09	-1.60195e-09	-1.59273e-09	-1.64662e-09	0.451245	-1.69722e-11	-6.17257e-12	7.72486e-12	2.7774e-11	3.85855e-11	6.17263e-11	6.79067e-11	1.09572e-10	1.43524e-10
0.45225	-1.85262e-11	-2.00638e-11	-6.17482e-12	2.93224e-11	4.47496e-11	5.09261e-11	7.254e-11	1.20378e-10	2.06801e-10	0.11225	-9.56654e-11	-1.00323e-10	-9.1081e-11	-1.09564e-10	-9.88065e-11	-1.03364e-10	-1.04889e-10	-9.88429e-11	-1.07957e-10	0.45225	-1.7e-11	-6.18e-12	-3.08e-12	2.16e-11	2.93e-11	7.25e-11	8.03e-11	1.14e-10	1.54e-10	0.11225	-1.62182e-09	-1.62202e-09	-1.60807e-09	-1.61424e-09	-1.60334e-09	-1.59584e-09	-1.60196e-09	-1.59878e-09	-1.639e-09	0.45225	-1.08092e-11	-1.55004e-12	2.31397e-11	1.69795e-11	4.01214e-11	5.55638e-11	6.32791e-11	1.15745e-10	1.41986e-10
0.453255	-2.62353e-11	-2.00632e-11	-4.62704e-12	3.08634e-11	3.54989e-11	4.93873e-11	8.02485e-11	1.26545e-10	2.08344e-10	0.1125	-8.96378e-11	-1.00268e-10	-9.10446e-11	-1.04989e-10	-9.72815e-11	-1.00332e-10	-9.42768e-11	-1.00295e-10	-1.03409e-10	0.453255	-2.62e-11	-1.7e-11	3.08e-12	2.47e-11	3.7e-11	7.1e-11	8.95e-11	1.17e-10	1.5e-10	0.1125	-1.60511e-09	-1.62047e-09	-1.60656e-09	-1.60962e-09	-1.59268e-09	-1.59418e-09	-1.60801e-09	-1.59425e-09	-1.63744e-09	0.453255	-2.16026e-11	-1.54272e-11	1.23474e-11	1.54351e-11	3.08736e-11	6.48151e-11	7.09888e-11	1.17284e-10	1.51238e-10
0.45426	-3.24061e-11	-2.16054e-11	4.62647e-12	2.62375e-11	3.54938e-11	5.40138e-11	8.17963e-11	1.21922e-10	2.1143e-10	0.11275	-1.04861e-10	-9.26789e-11	-8.95286e-11	-1.08039e-10	-1.04889e-10	-1.00313e-10	-1.06359e-10	-9.87883e-11	-1.00341e-10	0.45426	-2.32e-11	-1.7e-11	1.55e-12	2.78e-11	3.7e-11	7.25e-11	8.95e-11	1.19e-10	1.56e-10	0.11275	-1.60349e-09	-1.62353e-09	-1.60514e-09	-1.60051e-09	-1.58349e-09	-1.5866e-09	-1.59896e-09	-1.59574e-09	-1.63889e-09	0.45426	-2.31476e-11	-1.38867e-11	4.63379e-12	2.00638e-11	4.32041e-11	6.63646e-11	7.25338e-11	1.0495e-10	1.497e-10
0.455265	-3.08617e-11	-2.16048e-11	4.63098e-12	2.62364e-11	3.08679e-11	5.55576e-11	8.95071e-11	1.23466e-10	2.1606e-10	0.113	-1.06423e-10	-9.87155e-11	-9.10082e-11	-1.12569e-10	-1.03436e-10	-1.00341e-10	-9.72633e-11	-1.00323e-10	-1.01893e-10	0.455265	-2.62e-11	-2.62e-11	7.71e-12	3.24e-11	4.01e-11	7.41e-11	8.64e-11	1.27e-10	1.47e-10	0.113	-1.60502e-09	-1.62658e-09	-1.62487e-09	-1.61258e-09	-1.58808e-09	-1.59721e-09	-1.60951e-09	-1.59426e-09	-1.62826e-09	0.455265	-2.00655e-11	-4.63379e-12	7.71248e-12	2.77712e-11	3.39584e-11	7.71535e-11	7.25343e-11	1.11115e-10	1.52782e-10
0.45627	-1.85262e-11	-1.852e-11	7.71585e-12	2.77802e-11	3.2409e-11	5.55605e-11	8.79677e-11	1.32719e-10	2.20694e-10	0.11325	-9.72996e-11	-9.572e-11	-8.49989e-11	-1.01993e-10	-1.08003e-10	-1.04943e-10	-9.41585e-11	-1.03364e-10	-1.09537e-10	0.45627	-2.78e-11	-2.01e-11	-6.16e-12	3.4e-11	4.48e-11	7.41e-11	9.26e-11	1.25e-10	1.51e-10	0.11325	-1.60807e-09	-1.62358e-09	-1.60974e-09	-1.59892e-09	-1.60019e-09	-1.59272e-09	-1.59741e-09	-1.60032e-09	-1.63435e-09	0.45627	-2.46925e-11	-6.16976e-12	5.06726e-15	1.38986e-11	4.16698e-11	5.86555e-11	7.25388e-11	1.12661e-10	1.46615e-10
0.457275	-2.46931e-11	-1.69767e-11	9.25745e-12	3.24011e-11	3.3946e-11	6.17285e-11	8.79688e-11	1.32724e-10	2.37656e-10	0.1135	-1.00304e-10	-9.87247e-11	-9.86701e-11	-1.14139e-10	-1.07975e-10	-1.095e-10	-9.41767e-11	-1.00304e-10	-1.1108e-10	0.457275	-3.7e-11	-2.47e-11	7.71e-12	3.7e-11	5.56e-11	8.33e-11	9.41e-11	1.23e-10	1.56e-10	0.1135	-1.60662e-09	-1.62814e-09	-1.61116e-09	-1.59892e-09	-1.5805e-09	-1.59725e-09	-1.60339e-09	-1.59583e-09	-1.64201e-09	0.457275	-2.93213e-11	1.54328e-12	6.17144e-12	2.46931e-11	5.24649e-11	6.94421e-11	8.48772e-11	1.17288e-10	1.49693e-10
0.45828	-3.24073e-11	-1.69767e-11	4.6321e-12	1.5439e-11	1.85273e-11	6.01881e-11	9.25953e-11	1.3735e-10	2.28408e-10	0.11375	-1.0182e-10	-9.41221e-11	-9.56654e-11	-1.15673e-10	-9.88429e-11	-1.0192e-10	-1.00259e-10	-9.57473e-11	-1.06468e-10	0.45828	-3.55e-11	-1.39e-11	1.08e-11	3.7e-11	5.56e-11	8.02e-11	9.11e-11	1.13e-10	1.56e-10	0.11375	-1.61575e-09	-1.62806e-09	-1.60813e-09	-1.61257e-09	-1.5895e-09	-1.59423e-09	-1.5958e-09	-1.60344e-09	-1.64197e-09	0.45828	-3.08668e-11	9.25351e-12	7.71248e-12	3.70332e-11	4.4758e-11	6.48213e-11	8.7966e-11	1.18828e-10	1.3736e-10
0.459285	-3.54978e-11	-1.8516e-11	6.17708e-12	1.54334e-11	2.46892e-11	5.86487e-11	9.2597e-11	1.35811e-10	2.23783e-10	0.114	-9.72542e-11	-8.64967e-11	-8.96105e-11	-1.05025e-10	-1.01766e-10	-1.04898e-10	-9.72451e-11	-1.01802e-10	-9.8852e-11	0.459285	-3.7e-11	-1.54e-11	2.47e-11	4.63e-11	4.78e-11	7.25e-11	9.26e-11	1.08e-10	1.56e-10	0.114	-1.61427e-09	-1.61132e-09	-1.60965e-09	-1.59901e-09	-1.58497e-09	-1.59417e-09	-1.59576e-09	-1.60501e-09	-1.62826e-09	0.459285	-3.54893e-11	6.75634e-15	-1.53596e-12	3.39522e-11	4.47569e-11	6.94455e-11	8.79683e-11	1.08035e-10	1.45064e-10
0.46029	-4.47496e-11	-1.08075e-11	1.85143e-11	1.69744e-11	2.16082e-11	6.79011e-11	9.25993e-11	1.40435e-10	2.37659e-10	0.11425	-9.72451e-11	-9.10355e-11	-1.00222e-10	-1.07966e-10	-8.96378e-11	-1.00332e-10	-9.72451e-11	-9.87883e-11	-1.04916e-10	0.46029	-4.63e-11	-1.08e-11	2.16e-11	4.17e-11	6.02e-11	6.48e-11	8.8e-11	1.06e-10	1.4e-10	0.11425	-1.61122e-09	-1.61727e-09	-1.61274e-09	-1.61259e-09	-1.58348e-09	-1.58651e-09	-1.59725e-09	-1.60502e-09	-1.62972e-09	0.46029	-2.31538e-11	9.25632e-12	9.25632e-12	3.08707e-11	4.93839e-11	6.79039e-11	9.10532e-11	1.11114e-10	1.40437e-10
0.461295	-3.8586e-11	-1.54289e-11	1.69756e-11	1.38924e-11	2.46903e-11	6.79005e-11	9.87668e-11	1.35811e-10	2.3304e-10	0.1145	-1.00286e-10	-9.25879e-11	-9.57109e-11	-1.00386e-10	-9.87155e-11	-9.87974e-11	-1.00232e-10	-9.87883e-11	-1.06514e-10	0.461295	-2.93e-11	-3.09e-12	3.24e-11	4.17e-11	6.17e-11	6.17e-11	8.18e-11	1e-10	1.45e-10	0.1145	-1.61425e-09	-1.60821e-09	-1.61727e-09	-1.60356e-09	-1.59411e-09	-1.58191e-09	-1.59116e-09	-1.60649e-09	-1.63278e-09	0.461295	-2.31493e-11	9.25801e-12	1.08052e-11	4.1667e-11	5.09295e-11	6.48168e-11	9.25936e-11	1.0803e-10	1.29645e-10
0.4623	-4.32114e-11	-9.26252e-12	1.38907e-11	1.85143e-11	2.16093e-11	5.71066e-11	9.56841e-11	1.3735e-10	2.39206e-10	0.11475	-9.8761e-11	-9.26516e-11	-9.56927e-11	-1.04907e-10	-9.88065e-11	-1.01839e-10	-8.96287e-11	-1.01793e-10	-1.1256e-10	0.4623	-1.85e-11	3.08e-12	2.16e-11	3.86e-11	6.02e-11	6.79e-11	8.18e-11	9.41e-11	1.57e-10	0.11475	-1.61271e-09	-1.61727e-09	-1.60663e-09	-1.60959e-09	-1.58813e-09	-1.5849e-09	-1.59118e-09	-1.59739e-09	-1.63272e-09	0.4623	-2.31476e-11	4.62985e-12	1.85171e-11	4.78378e-11	5.55543e-11	5.86482e-11	8.48834e-11	1.04939e-10	1.43517e-10
0.463305	-4.62946e-11	-1.0799e-11	1.38884e-11	9.26364e-12	2.77752e-11	6.01858e-11	9.41409e-11	1.32726e-10	2.36122e-10	0.115	-9.56927e-11	-1.01748e-10	-9.71996e-11	-1.03464e-10	-1.04889e-10	-1.01857e-10	-9.87519e-11	-9.42222e-11	-1.01893e-10	0.463305	-2.16e-11	4.63e-12	3.09e-11	3.86e-11	6.17e-11	6.48e-11	7.41e-11	1e-10	1.39e-10	0.115	-1.60815e-09	-1.61131e-09	-1.60806e-09	-1.60657e-09	-1.59721e-09	-1.57883e-09	-1.60025e-09	-1.60343e-09	-1.62053e-09	0.463305	-1.85217e-11	3.9412e-15	2.00638e-11	4.32142e-11	4.93885e-11	6.17291e-11	8.48829e-11	9.10639e-11	1.35811e-10
0.46431	-3.85843e-11	-1.54891e-12	1.08035e-11	1.08052e-11	2.31566e-11	5.71004e-11	9.41375e-11	1.38892e-10	2.31495e-10	0.11525	-9.41676e-11	-9.26243e-11	-9.41585e-11	-1.12578e-10	-1.01866e-10	-1.01839e-10	-1.04889e-10	-1.00241e-10	-9.73178e-11	0.46431	-1.39e-11	4.63e-12	2.32e-11	3.55e-11	5.25e-11	5.56e-11	7.87e-11	9.57e-11	1.37e-10	0.11525	-1.61113e-09	-1.6249e-09	-1.60204e-09	-1.60503e-09	-1.59114e-09	-1.58183e-09	-1.58655e-09	-1.60192e-09	-1.62202e-09	0.46431	-2.00599e-11	6.17032e-12	2.46886e-11	4.47535e-11	5.24711e-11	5.86476e-11	9.10492e-11	1.04933e-10	1.32725e-10
0.465315	-3.70382e-11	-7.71248e-12	9.25914e-12	1.85143e-11	3.85776e-11	5.09295e-11	8.6425e-11	1.34267e-10	2.34579e-10	0.1155	-9.71996e-11	-8.80945e-11	-9.41585e-11	-1.07993e-10	-1.00332e-10	-9.88247e-11	-1.01839e-10	-9.41949e-11	-1.07948e-10	0.465315	-1.39e-11	1.85e-11	2.78e-11	4.17e-11	5.86e-11	4.48e-11	6.79e-11	1.05e-10	1.34e-10	0.1155	-1.60514e-09	-1.60822e-09	-1.61419e-09	-1.60656e-09	-1.588e-09	-1.57876e-09	-1.58194e-09	-1.59891e-09	-1.6281e-09	0.465315	-1.38884e-11	4.6321e-12	1.85245e-11	4.16675e-11	5.40155e-11	6.32696e-11	8.48834e-11	8.95178e-11	1.35807e-10
0.46632	-3.395e-11	-3.08938e-12	6.17482e-12	1.23525e-11	4.16692e-11	4.78446e-11	8.17957e-11	1.34264e-10	2.37657e-10	0.11575	-9.57018e-11	-1.04734e-10	-9.71541e-11	-9.73633e-11	-1.01811e-10	-1.0488e-10	-9.57109e-11	-9.72269e-11	-1.05016e-10	0.46632	-1.23e-11	1.85e-11	2.01e-11	2.93e-11	5.56e-11	5.56e-11	7.25e-11	9.88e-11	1.34e-10	0.11575	-1.6204e-09	-1.61113e-09	-1.61275e-09	-1.60807e-09	-1.57884e-09	-1.57271e-09	-1.58957e-09	-1.608e-09	-1.62358e-09	0.46632	-4.63379e-12	9.25632e-12	2.62313e-11	3.54978e-11	5.70998e-11	5.40166e-11	8.64199e-11	9.41425e-11	1.32723e-10
0.467325	-2.46976e-11	-6.17257e-12	7.71529e-12	2.31436e-11	4.62968e-11	5.24683e-11	8.17929e-11	1.29636e-10	2.16068e-10	0.116	-9.71814e-11	-8.65968e-11	-8.804e-11	-1.09537e-10	-9.57382e-11	-1.00368e-10	-9.41767e-11	-1.00341e-10	-1.14103e-10	0.467325	-1.54e-11	7.72e-12	2.93e-11	2.78e-11	4.94e-11	6.02e-11	7.1e-11	9.57e-11	1.34e-10	0.116	-1.62808e-09	-1.60506e-09	-1.6143e-09	-1.60347e-09	-1.58032e-09	-1.58334e-09	-1.59568e-09	-1.60039e-09	-1.62656e-09	0.467325	-6.17539e-12	4.62929e-12	2.16077e-11	3.54921e-11	5.55576e-11	4.9389e-11	7.71698e-11	1.04935e-10	1.31181e-10
0.46833	-2.93201e-11	-7.71417e-12	6.1737e-12	1.85239e-11	4.62968e-11	4.7844e-11	7.87069e-11	1.25003e-10	2.16061e-10	0.11625	-9.11447e-11	-9.71541e-11	-9.10355e-11	-1.15592e-10	-9.8761e-11	-1.04898e-10	-9.87065e-11	-1.0793e-10	-1.0655e-10	0.46833	-7.72e-12	1.08e-11	1.85e-11	2.62e-11	3.86e-11	5.4e-11	7.25e-11	1.08e-10	1.36e-10	0.11625	-1.62201e-09	-1.60654e-09	-1.62033e-09	-1.59891e-09	-1.58182e-09	-1.58189e-09	-1.58955e-09	-1.59273e-09	-1.61898e-09	0.46833	-1.38884e-11	-1.54272e-12	2.16077e-11	2.62381e-11	5.24716e-11	5.55526e-11	8.33322e-11	9.41482e-11	1.34264e-10
0.469335	-2.77769e-11	-3.09276e-12	6.16694e-12	2.6233e-11	4.16681e-11	4.93839e-11	7.40821e-11	1.12665e-10	2.20686e-10	0.1165	-1.0025e-10	-9.56654e-11	-9.1081e-11	-9.5811e-11	-1.00259e-10	-1.01811e-10	-9.26789e-11	-9.8761e-11	-1.09537e-10	0.469335	-9.26e-12	6.17e-12	2.31e-11	2.01e-11	3.86e-11	6.33e-11	7.56e-11	1.05e-10	1.31e-10	0.1165	-1.61889e-09	-1.6051e-09	-1.60661e-09	-1.60498e-09	-1.57577e-09	-1.58492e-09	-1.57878e-09	-1.59576e-09	-1.62345e-09	0.469335	-1.85115e-11	-6.17032e-12	2.62308e-11	2.31509e-11	4.93862e-11	4.63075e-11	7.56215e-11	1.04939e-10	1.32726e-10
0.47034	-2.00678e-11	-1.54266e-11	-1.0794e-11	2.62364e-11	3.54972e-11	4.78401e-11	8.17878e-11	1.14203e-10	2.14515e-10	0.11675	-9.87701e-11	-9.10719e-11	-9.56836e-11	-9.71905e-11	-9.26698e-11	-9.11629e-11	-1.00277e-10	-8.80854e-11	-1.06468e-10	0.47034	-1.23e-11	3.09e-12	1.08e-11	7.73e-12	4.01e-11	7.25e-11	8.49e-11	1.13e-10	1.45e-10	0.11675	-1.61277e-09	-1.61721e-09	-1.60203e-09	-1.60496e-09	-1.58181e-09	-1.5834e-09	-1.56809e-09	-1.59883e-09	-1.61434e-09	0.47034	-1.55511e-12	-3.08488e-12	1.69789e-11	2.46908e-11	4.93823e-11	6.17235e-11	6.94478e-11	1.04944e-10	1.40435e-10
0.471345	-2.62336e-11	-1.08081e-11	-3.08938e-12	2.77791e-11	3.39562e-11	4.16703e-11	7.2536e-11	1.15747e-10	2.03724e-10	0.117	-9.72451e-11	-8.95195e-11	-1.00241e-10	-9.26243e-11	-9.72087e-11	-9.87701e-11	-1.01784e-10	-9.71359e-11	-1.00377e-10	0.471345	-1.23e-11	1.54e-12	1.08e-11	2.01e-11	3.55e-11	7.41e-11	8.33e-11	1.22e-10	1.45e-10	0.117	-1.6128e-09	-1.60359e-09	-1.61419e-09	-1.59583e-09	-1.57886e-09	-1.5804e-09	-1.57566e-09	-1.60028e-09	-1.61584e-09	0.471345	-1.69727e-11	4.6214e-12	1.5434e-11	2.16088e-11	4.16732e-11	5.55627e-11	6.32808e-11	1.08032e-10	1.38899e-10
0.47235	-2.62347e-11	-2.0061e-11	-3.086e-12	2.93218e-11	4.3208e-11	4.01265e-11	6.79095e-11	1.20377e-10	2.20678e-10	0.11725	-9.86792e-11	-8.95377e-11	-9.26607e-11	-9.26152e-11	-9.87974e-11	-1.06332e-10	-9.11993e-11	-9.11629e-11	-1.04961e-10	0.47235	-1.85e-11	-9.25e-12	3.09e-12	1.7e-11	2.93e-11	8.02e-11	7.87e-11	1.19e-10	1.5e-10	0.11725	-1.62346e-09	-1.60957e-09	-1.61276e-09	-1.59883e-09	-1.58948e-09	-1.58952e-09	-1.57724e-09	-1.58511e-09	-1.62039e-09	0.47235	-2.31447e-11	-1.07945e-11	1.69705e-11	2.62313e-11	4.6294e-11	6.17325e-11	7.40742e-11	1.17283e-10	1.46606e-10
0.473355	-2.31498e-11	-2.46908e-11	-1.54272e-12	2.93218e-11	4.16675e-11	4.16726e-11	7.71619e-11	1.26548e-10	2.06805e-10	0.1175	-8.50353e-11	-9.4113e-11	-9.5629e-11	-9.57018e-11	-1.0487e-10	-8.81218e-11	-1.04789e-10	-1.033e-10	-1.12623e-10	0.473355	-2.62e-11	-3.09e-12	2.82e-15	2.47e-11	3.86e-11	7.72e-11	8.8e-11	1.27e-10	1.45e-10	0.1175	-1.62189e-09	-1.6035e-09	-1.61579e-09	-1.60031e-09	-1.58345e-09	-1.58806e-09	-1.57873e-09	-1.59574e-09	-1.61587e-09	0.473355	-1.69812e-11	-3.09332e-12	3.09276e-12	1.85228e-11	3.8581e-11	7.09848e-11	7.5622e-11	1.08035e-10	1.38903e-10
0.47436	-2.1606e-11	-2.46914e-11	1.54159e-12	2.7778e-11	3.70399e-11	5.40127e-11	8.02524e-11	1.28093e-10	2.05264e-10	0.11775	-9.71541e-11	-9.4113e-11	-8.95923e-11	-1.01811e-10	-9.88156e-11	-9.56745e-11	-9.26698e-11	-9.87974e-11	-1.1423e-10	0.47436	-3.4e-11	-1.08e-11	4.63e-12	2.32e-11	4.78e-11	8.18e-11	9.72e-11	1.17e-10	1.59e-10	0.11775	-1.60362e-09	-1.60193e-09	-1.61435e-09	-1.58966e-09	-1.58336e-09	-1.58955e-09	-1.57265e-09	-1.60337e-09	-1.62037e-09	0.47436	-2.46886e-11	-1.38805e-11	6.17032e-12	2.00655e-11	2.77847e-11	6.32802e-11	8.02507e-11	1.12659e-10	1.52779e-10
0.475365	-2.00655e-11	-2.16048e-11	3.9412e-15	2.31521e-11	3.54927e-11	6.01864e-11	8.79621e-11	1.29636e-10	2.23769e-10	0.118	-9.71723e-11	-8.95195e-11	-9.72269e-11	-1.00295e-10	-1.00277e-10	-1.01793e-10	-9.26061e-11	-9.87792e-11	-1.20258e-10	0.475365	-3.86e-11	-2.31e-11	4.63e-12	3.55e-11	4.01e-11	8.02e-11	9.41e-11	1.3e-10	1.5e-10	0.118	-1.6096e-09	-1.60046e-09	-1.62493e-09	-1.59261e-09	-1.57565e-09	-1.5865e-09	-1.57411e-09	-1.59421e-09	-1.61278e-09	0.475365	-2.16093e-11	-5.06726e-15	1.54666e-12	2.93173e-11	3.24084e-11	7.09888e-11	8.48783e-11	1.142e-10	1.51243e-10
0.47637	-2.62336e-11	-1.54334e-11	9.25182e-12	2.6233e-11	2.62375e-11	6.17285e-11	8.18019e-11	1.32722e-10	2.23776e-10	0.11825	-8.804e-11	-8.64512e-11	-1.04907e-10	-9.572e-11	-9.56836e-11	-9.72996e-11	-9.41312e-11	-1.00259e-10	-1.06596e-10	0.47637	-4.17e-11	-1.7e-11	6.18e-12	3.86e-11	4.01e-11	7.41e-11	9.41e-11	1.22e-10	1.56e-10	0.11825	-1.60815e-09	-1.61111e-09	-1.61137e-09	-1.58652e-09	-1.56041e-09	-1.58345e-09	-1.56956e-09	-1.58502e-09	-1.61282e-09	0.47637	-2.7774e-11	0	6.17201e-12	2.46976e-11	3.54955e-11	7.25332e-11	8.3339e-11	1.08038e-10	1.52784e-10
0.477375	-2.62358e-11	-1.08041e-11	-3.08094e-12	2.16054e-11	2.16099e-11	5.55616e-11	9.72179e-11	1.34264e-10	2.22234e-10	0.1185	-9.10173e-11	-8.79581e-11	-1.06405e-10	-9.72269e-11	-9.1081e-11	-1.0488e-10	-9.41585e-11	-9.26789e-11	-1.11098e-10	0.477375	-4.47e-11	-1.85e-11	1.85e-11	3.86e-11	5.09e-11	8.49e-11	9.26e-11	1.16e-10	1.5e-10	0.1185	-1.6142e-09	-1.60809e-09	-1.62796e-09	-1.58502e-09	-1.571e-09	-1.58644e-09	-1.57102e-09	-1.5865e-09	-1.62804e-09	0.477375	-2.00672e-11	1.12606e-15	7.71585e-12	3.395e-11	3.85832e-11	7.09899e-11	8.64267e-11	1.24998e-10	1.52782e-10
0.47838	-2.62375e-11	-9.26083e-12	-1.12606e-15	1.54345e-11	2.77735e-11	5.86453e-11	8.79694e-11	1.31182e-10	2.23777e-10	0.11875	-8.7949e-11	-8.80036e-11	-9.42586e-11	-9.87338e-11	-9.1081e-11	-1.01893e-10	-9.72178e-11	-9.87428e-11	-1.12651e-10	0.47838	-3.09e-11	-1.7e-11	7.73e-12	3.24e-11	4.32e-11	7.41e-11	9.88e-11	1.16e-10	1.53e-10	0.11875	-1.60806e-09	-1.60353e-09	-1.61127e-09	-1.59415e-09	-1.57109e-09	-1.58029e-09	-1.56491e-09	-1.5895e-09	-1.62202e-09	0.47838	-2.46914e-11	3.08713e-12	7.71529e-12	3.70382e-11	4.47558e-11	6.63629e-11	9.72229e-11	1.18835e-10	1.43533e-10
0.479385	-3.08685e-11	-1.08013e-11	5.63029e-16	1.38924e-11	1.85256e-11	6.32741e-11	8.48851e-11	1.37351e-10	2.26859e-10	0.119	-8.18941e-11	-9.41039e-11	-1.01784e-10	-9.42131e-11	-9.57109e-11	-1.04907e-10	-9.87428e-11	-1.00332e-10	-1.12687e-10	0.479385	-3.09e-11	-7.72e-12	2.47e-11	4.01e-11	5.86e-11	7.1e-11	9.41e-11	1.1e-10	1.48e-10	0.119	-1.59437e-09	-1.608e-09	-1.60815e-09	-1.59265e-09	-1.57565e-09	-1.56807e-09	-1.56187e-09	-1.57887e-09	-1.62045e-09	0.479385	-2.62336e-11	7.71529e-12	4.63323e-12	3.85804e-11	5.24666e-11	6.6364e-11	9.72252e-11	1.17287e-10	1.5432e-10
0.48039	-4.32074e-11	-7.71642e-12	1.54835e-12	2.00571e-11	2.62324e-11	6.63584e-11	9.41341e-11	1.38892e-10	2.20695e-10	0.11925	-9.25242e-11	-9.41039e-11	-9.72723e-11	-1.01802e-10	-1.04843e-10	-1.01893e-10	-9.57018e-11	-1.04889e-10	-1.17262e-10	0.48039	-3.24e-11	-1.08e-11	2.01e-11	4.63e-11	5.4e-11	6.33e-11	8.8e-11	1.05e-10	1.42e-10	0.11925	-1.60649e-09	-1.59588e-09	-1.61261e-09	-1.58808e-09	-1.57258e-09	-1.57103e-09	-1.56947e-09	-1.58335e-09	-1.61893e-09	0.48039	-2.16088e-11	9.26026e-12	1.08024e-11	3.54978e-11	4.63008e-11	7.40692e-11	9.25953e-11	1.09575e-10	1.43529e-10
0.481395	-4.32119e-11	-4.6321e-12	1.69694e-11	1.08019e-11	2.46903e-11	6.17342e-11	8.64301e-11	1.29643e-10	2.28404e-10	0.1195	-9.1081e-11	-8.80582e-11	-1.00259e-10	-1.00295e-10	-9.73269e-11	-1.0488e-10	-9.56927e-11	-1.00313e-10	-1.17299e-10	0.481395	-3.4e-11	3.08e-12	2.47e-11	3.4e-11	5.86e-11	5.25e-11	8.95e-11	1.08e-10	1.39e-10	0.1195	-1.60808e-09	-1.60496e-09	-1.59738e-09	-1.59097e-09	-1.56496e-09	-1.56805e-09	-1.56955e-09	-1.57883e-09	-1.62191e-09	0.481395	-2.46903e-11	1.23435e-11	1.54323e-11	3.8581e-11	4.63002e-11	5.86549e-11	8.33435e-11	1.06485e-10	1.43525e-10
0.4824	-4.32131e-11	-7.71473e-12	1.38929e-11	-1.53484e-12	1.69846e-11	6.4814e-11	9.5678e-11	1.38896e-10	2.29948e-10	0.11975	-9.40311e-11	-9.71814e-11	-9.42495e-11	-9.57109e-11	-1.06368e-10	-9.72906e-11	-9.7236e-11	-9.57473e-11	-1.18796e-10	0.4824	-3.55e-11	1.08e-11	2.78e-11	4.78e-11	6.48e-11	6.02e-11	8.03e-11	1.02e-10	1.28e-10	0.11975	-1.60659e-09	-1.60504e-09	-1.5958e-09	-1.56818e-09	-1.56946e-09	-1.57707e-09	-1.57409e-09	-1.58328e-09	-1.61126e-09	0.4824	-2.1606e-11	7.71642e-12	1.85205e-11	3.85815e-11	5.09272e-11	7.09826e-11	9.10503e-11	9.87707e-11	1.41976e-10
0.483405	-4.62957e-11	-6.17257e-12	2.00587e-11	9.25689e-12	3.24016e-11	5.71054e-11	8.95138e-11	1.48151e-10	2.28405e-10	0.12	-7.88621e-11	-9.8761e-11	-1.06386e-10	-9.56472e-11	-9.58019e-11	-1.00268e-10	-1.00295e-10	-1.01875e-10	-1.14221e-10	0.483405	-2.16e-11	3.09e-12	2.62e-11	3.86e-11	6.48e-11	5.4e-11	6.95e-11	1.02e-10	1.37e-10	0.12	-1.60961e-09	-1.60955e-09	-1.60186e-09	-1.5787e-09	-1.56342e-09	-1.55892e-09	-1.56799e-09	-1.56654e-09	-1.61267e-09	0.483405	-1.85166e-11	3.08995e-12	2.46863e-11	3.70405e-11	5.24694e-11	6.01909e-11	8.95116e-11	9.25981e-11	1.23473e-10
0.48441	-4.16703e-11	-3.08826e-12	1.54311e-11	1.23435e-11	2.77819e-11	6.01858e-11	9.25976e-11	1.45069e-10	2.23782e-10	0.12025	-8.94286e-11	-9.87065e-11	-1.01884e-10	-8.96014e-11	-1.04834e-10	-9.57109e-11	-1.00259e-10	-1.1108e-10	-1.12678e-10	0.48441	-1.08e-11	1.23e-11	3.39e-11	3.86e-11	5.71e-11	5.25e-11	8.33e-11	1e-10	1.3e-10	0.12025	-1.60653e-09	-1.59898e-09	-1.59735e-09	-1.57575e-09	-1.56948e-09	-1.57406e-09	-1.56493e-09	-1.568e-09	-1.60355e-09	0.48441	-7.72148e-12	7.71191e-12	1.38952e-11	4.01242e-11	4.78463e-11	5.71015e-11	9.10498e-11	8.95138e-11	1.32716e-10
0.485415	-4.16647e-11	-4.62704e-12	6.17651e-12	7.72092e-12	3.08645e-11	5.71021e-11	9.72179e-11	1.41979e-10	2.36113e-10	0.1205	-8.64512e-11	-8.80309e-11	-1.01866e-10	-9.86792e-11	-9.57655e-11	-9.57382e-11	-9.1172e-11	-1.14148e-10	-1.14148e-10	0.485415	-1.08e-11	6.18e-12	2.93e-11	3.4e-11	5.4e-11	4.78e-11	7.25e-11	9.72e-11	1.27e-10	0.1205	-1.59891e-09	-1.61106e-09	-1.60196e-09	-1.58181e-09	-1.56949e-09	-1.57413e-09	-1.56949e-09	-1.57407e-09	-1.60806e-09	0.485415	-1.0803e-11	2.25211e-15	1.85205e-11	4.01242e-11	5.55548e-11	5.40189e-11	8.17991e-11	9.56813e-11	1.2501e-10
0.48642	-3.08679e-11	1.53934e-12	6.17032e-12	1.54289e-11	3.08713e-11	5.55588e-11	7.71732e-11	1.29638e-10	2.23776e-10	0.12075	-8.79126e-11	-8.79763e-11	-1.03391e-10	-9.26516e-11	-1.00277e-10	-1.04834e-10	-1.01757e-10	-1.08057e-10	-1.06578e-10	0.48642	-9.26e-12	7.72e-12	1.54e-11	2.93e-11	5.56e-11	5.86e-11	7.25e-11	1.1e-10	1.37e-10	0.12075	-1.60344e-09	-1.60195e-09	-1.61257e-09	-1.57876e-09	-1.56493e-09	-1.57112e-09	-1.56948e-09	-1.56656e-09	-1.60512e-09	0.48642	-1.38867e-11	-1.54497e-12	2.62313e-11	3.70382e-11	5.40155e-11	6.17268e-11	8.6425e-11	9.56881e-11	1.29636e-10
0.487425	-2.62375e-11	-3.08544e-12	-1.53878e-12	1.23519e-11	4.62895e-11	5.55531e-11	8.17884e-11	1.21925e-10	2.11434e-10	0.121	-8.03417e-11	-8.95013e-11	-1.03391e-10	-9.56563e-11	-9.87519e-11	-9.57109e-11	-9.57109e-11	-1.06505e-10	-1.14139e-10	0.487425	-1.55e-12	7.72e-12	2.78e-11	2.78e-11	4.17e-11	6.02e-11	6.48e-11	1.08e-10	1.3e-10	0.121	-1.6019e-09	-1.59575e-09	-1.59586e-09	-1.57268e-09	-1.5679e-09	-1.57722e-09	-1.56341e-09	-1.58023e-09	-1.62033e-09	0.487425	-9.25914e-12	-7.71529e-12	2.16105e-11	3.24078e-11	5.40121e-11	5.71026e-11	9.4129e-11	1.08024e-10	1.34263e-10
0.48843	-2.62364e-11	-4.63041e-12	3.086e-12	2.4688e-11	3.70405e-11	4.16737e-11	7.09944e-11	1.29631e-10	2.1143e-10	0.12125	-8.79035e-11	-8.94831e-11	-1.01848e-10	-9.41403e-11	-9.4204e-11	-9.11174e-11	-9.41949e-11	-1.08021e-10	-1.11107e-10	0.48843	-1.23e-11	6.17e-12	1.85e-11	2.01e-11	4.17e-11	5.86e-11	7.1e-11	1e-10	1.33e-10	0.12125	-1.59585e-09	-1.58811e-09	-1.59732e-09	-1.57872e-09	-1.55879e-09	-1.58028e-09	-1.56791e-09	-1.57871e-09	-1.61584e-09	0.48843	-3.09163e-12	-1.0799e-11	2.93184e-11	2.46959e-11	4.6303e-11	5.55605e-11	7.1004e-11	1.03403e-10	1.31182e-10
0.489435	-2.77802e-11	-7.71585e-12	6.1675e-12	2.46925e-11	3.2414e-11	4.16687e-11	6.94511e-11	1.23463e-10	2.11432e-10	0.1215	-8.4917e-11	-8.49079e-11	-9.87974e-11	-9.26152e-11	-1.00259e-10	-9.72269e-11	-1.0182e-10	-1.07984e-10	-1.06559e-10	0.489435	-9.26e-12	9.26e-12	1.23e-11	2.16e-11	4.32e-11	6.17e-11	7.87e-11	1.11e-10	1.34e-10	0.1215	-1.60492e-09	-1.59263e-09	-1.60188e-09	-1.57416e-09	-1.56177e-09	-1.57572e-09	-1.56179e-09	-1.565e-09	-1.61427e-09	0.489435	-1.07996e-11	-3.09276e-12	2.62375e-11	2.62324e-11	5.09239e-11	6.01847e-11	8.33328e-11	1.0649e-10	1.35806e-10
0.49044	-3.24056e-11	-9.26026e-12	-6.16638e-12	2.46959e-11	4.1663e-11	4.16698e-11	7.71563e-11	1.17293e-10	2.17596e-10	0.12175	-8.79217e-11	-8.49716e-11	-1.00277e-10	-9.41221e-11	-9.72542e-11	-1.03345e-10	-1.03336e-10	-1.00395e-10	-1.14103e-10	0.49044	-1.39e-11	4.63e-12	9.26e-12	1.85e-11	3.55e-11	6.33e-11	7.87e-11	1.23e-10	1.48e-10	0.12175	-1.59885e-09	-1.59112e-09	-1.59888e-09	-1.57105e-09	-1.55877e-09	-1.57568e-09	-1.55419e-09	-1.56956e-09	-1.61275e-09	0.49044	-9.26195e-12	-1.23412e-11	2.7774e-11	1.85239e-11	4.32125e-11	5.55616e-11	8.33334e-11	1.18824e-10	1.32727e-10
0.491445	-2.77774e-11	-1.23474e-11	-5.63029e-15	3.39472e-11	3.55023e-11	4.47569e-11	6.32864e-11	1.21916e-10	2.05265e-10	0.122	-8.34283e-11	-1.00177e-10	-9.57382e-11	-9.25879e-11	-9.87792e-11	-1.00341e-10	-9.41676e-11	-1.06441e-10	-1.05025e-10	0.491445	-9.26e-12	-3.08e-12	9.26e-12	1.54e-11	3.55e-11	6.64e-11	8.03e-11	1.25e-10	1.48e-10	0.122	-1.59427e-09	-1.58808e-09	-1.60189e-09	-1.56644e-09	-1.56483e-09	-1.57418e-09	-1.56326e-09	-1.58176e-09	-1.6142e-09	0.491445	-1.38896e-11	-7.72205e-12	1.54345e-11	2.31459e-11	3.70416e-11	6.01847e-11	7.25377e-11	1.08039e-10	1.41979e-10
0.49245	-1.85239e-11	-1.85171e-11	-9.25238e-12	2.93235e-11	4.78378e-11	5.24677e-11	8.17884e-11	1.17291e-10	2.16059e-10	0.12225	-9.40584e-11	-9.26789e-11	-1.00268e-10	-8.95195e-11	-1.01829e-10	-1.01875e-10	-8.95832e-11	-1.04907e-10	-1.09537e-10	0.49245	-1.39e-11	-1.55e-12	6.17e-12	1.54e-11	3.09e-11	8.18e-11	8.95e-11	1.11e-10	1.53e-10	0.12225	-1.59881e-09	-1.59112e-09	-1.59877e-09	-1.56337e-09	-1.56031e-09	-1.57722e-09	-1.55874e-09	-1.57575e-09	-1.60348e-09	0.49245	-1.85188e-11	-1.85138e-11	7.7198e-12	1.85205e-11	3.8577e-11	5.55633e-11	7.0995e-11	1.23458e-10	1.41985e-10
0.493455	-2.16082e-11	-1.85217e-11	1.53822e-12	2.7778e-11	4.93806e-11	4.93868e-11	8.48795e-11	1.17291e-10	2.23772e-10	0.1225	-9.10992e-11	-9.87155e-11	-9.7236e-11	-8.79672e-11	-1.00295e-10	-1.06441e-10	-9.71814e-11	-9.72996e-11	-1.08066e-10	0.493455	-2.78e-11	-1.23e-11	3.09e-12	2.62e-11	3.55e-11	7.72e-11	9.88e-11	1.22e-10	1.53e-10	0.1225	-1.59888e-09	-1.5927e-09	-1.5836e-09	-1.56493e-09	-1.56334e-09	-1.57725e-09	-1.5587e-09	-1.57871e-09	-1.59427e-09	0.493455	-2.16037e-11	-1.38907e-11	9.25745e-12	1.69761e-11	2.62426e-11	6.48134e-11	8.02457e-11	1.25003e-10	1.51236e-10
0.49446	-3.08589e-11	-2.46908e-11	-1.54159e-12	2.31538e-11	3.8586e-11	5.093e-11	8.48806e-11	1.2192e-10	2.2069e-10	0.12275	-9.56017e-11	-9.57928e-11	-9.572e-11	-8.64967e-11	-9.57382e-11	-1.03409e-10	-9.72723e-11	-1.01839e-10	-1.12605e-10	0.49446	-3.09e-11	-1.39e-11	4.63e-12	2.78e-11	2.93e-11	8.8e-11	8.03e-11	1.23e-10	1.45e-10	0.12275	-1.60495e-09	-1.59875e-09	-1.60028e-09	-1.57407e-09	-1.56492e-09	-1.5803e-09	-1.5557e-09	-1.56956e-09	-1.59423e-09	0.49446	-1.85217e-11	-1.23474e-11	4.63267e-12	1.54379e-11	3.24078e-11	6.17358e-11	7.56215e-11	1.17291e-10	1.43533e-10
0.495465	-2.1611e-11	-2.62353e-11	1.12606e-15	3.086e-11	3.85781e-11	5.70975e-11	8.48823e-11	1.28094e-10	2.19151e-10	0.123	-8.64694e-11	-1.10953e-10	-1.00277e-10	-9.71541e-11	-1.00277e-10	-1.01857e-10	-1.04834e-10	-1.03391e-10	-1.08075e-10	0.495465	-3.55e-11	-7.72e-12	-1.54e-12	4.01e-11	3.7e-11	8.33e-11	9.26e-11	1.14e-10	1.6e-10	0.123	-1.60034e-09	-1.58959e-09	-1.6003e-09	-1.56949e-09	-1.57095e-09	-1.58027e-09	-1.56484e-09	-1.56643e-09	-1.5973e-09	0.495465	-2.16037e-11	-1.38834e-11	7.71304e-12	2.7774e-11	3.54938e-11	7.09871e-11	7.25411e-11	1.12663e-10	1.55864e-10
0.49647	-2.62341e-11	-2.62324e-11	4.6276e-12	2.31521e-11	2.7783e-11	5.24745e-11	8.95093e-11	1.38888e-10	2.29944e-10	0.12325	-8.48806e-11	-9.88156e-11	-9.87883e-11	-9.56927e-11	-9.88338e-11	-1.00295e-10	-9.42404e-11	-1.03445e-10	-1.11126e-10	0.49647	-3.4e-11	-1.85e-11	7.71e-12	3.86e-11	4.32e-11	9.26e-11	9.57e-11	1.33e-10	1.44e-10	0.12325	-1.58811e-09	-1.58195e-09	-1.58657e-09	-1.5603e-09	-1.55881e-09	-1.57114e-09	-1.56636e-09	-1.56343e-09	-1.60038e-09	0.49647	-1.85222e-11	1.53709e-12	1.54497e-12	2.62392e-11	3.39522e-11	6.945e-11	8.7961e-11	1.15745e-10	1.46615e-10
0.497475	-2.62398e-11	-1.69801e-11	3.08769e-12	2.31476e-11	2.77797e-11	5.55599e-11	9.10515e-11	1.28098e-10	2.25323e-10	0.1235	-8.33737e-11	-9.41949e-11	-1.00268e-10	-9.56199e-11	-1.07921e-10	-9.57564e-11	-1.00332e-10	-1.11007e-10	-1.15692e-10	0.497475	-4.01e-11	-2.62e-11	1.55e-12	3.55e-11	4.94e-11	7.1e-11	1.03e-10	1.2e-10	1.59e-10	0.1235	-1.58805e-09	-1.588e-09	-1.58495e-09	-1.55724e-09	-1.56176e-09	-1.57569e-09	-1.55576e-09	-1.57409e-09	-1.60191e-09	0.497475	-2.31464e-11	0	1.68909e-15	3.39494e-11	3.24157e-11	7.40754e-11	8.64228e-11	1.15747e-10	1.45071e-10
0.49848	-3.70326e-11	-1.85171e-11	4.6321e-12	1.85194e-11	2.93213e-11	6.32735e-11	8.64261e-11	1.32724e-10	2.3149e-10	0.12375	-8.79854e-11	-9.8761e-11	-9.41767e-11	-8.50353e-11	-9.88429e-11	-1.03327e-10	-1.095e-10	-1.00432e-10	-1.11171e-10	0.49848	-4.01e-11	-1.08e-11	1.85e-11	3.55e-11	6.17e-11	7.56e-11	9.88e-11	1.16e-10	1.44e-10	0.12375	-1.5895e-09	-1.58798e-09	-1.58346e-09	-1.56487e-09	-1.55715e-09	-1.58024e-09	-1.56632e-09	-1.57569e-09	-1.60038e-09	0.49848	-2.00644e-11	-1.53991e-12	3.08375e-12	3.39545e-11	4.93755e-11	7.25343e-11	8.17985e-11	1.17287e-10	1.49695e-10
0.499485	-3.08702e-11	-1.38912e-11	1.23429e-11	1.38946e-11	2.77769e-11	6.79017e-11	8.79666e-11	1.41979e-10	2.29951e-10	0.124	-9.56017e-11	-1.01839e-10	-9.41585e-11	-1.00195e-10	-1.01893e-10	-9.88247e-11	-1.06514e-10	-1.09528e-10	-1.15628e-10	0.499485	-4.01e-11	-1.23e-11	1.54e-11	3.55e-11	5.71e-11	6.79e-11	9.11e-11	1.17e-10	1.45e-10	0.124	-1.57728e-09	-1.57888e-09	-1.59111e-09	-1.56948e-09	-1.54795e-09	-1.57115e-09	-1.55874e-09	-1.57715e-09	-1.59737e-09	0.499485	-2.16071e-11	6.17032e-12	-1.53822e-12	4.01226e-11	4.01321e-11	7.09916e-11	8.95054e-11	1.12657e-10	1.43527e-10
0.50049	-3.70388e-11	-1.38873e-11	1.08024e-11	2.31397e-11	2.007e-11	6.48168e-11	8.797e-11	1.41981e-10	2.33038e-10	0.12425	-8.9565e-11	-1.01848e-10	-9.71814e-11	-9.57382e-11	-1.11044e-10	-1.03336e-10	-1.07902e-10	-1.11107e-10	-1.00414e-10	0.50049	-2.93e-11	-6.18e-12	2.31e-11	4.01e-11	6.17e-11	6.64e-11	8.64e-11	1.16e-10	1.44e-10	0.12425	-1.57264e-09	-1.58649e-09	-1.59569e-09	-1.56799e-09	-1.54492e-09	-1.57714e-09	-1.55569e-09	-1.5649e-09	-1.60645e-09	0.50049	-2.62313e-11	6.17482e-12	7.71642e-12	3.85843e-11	4.93834e-11	7.09888e-11	8.33429e-11	1.01861e-10	1.41984e-10
0.501495	-4.32086e-11	-7.71642e-12	7.71867e-12	6.18271e-12	3.24016e-11	5.86487e-11	9.56791e-11	1.38895e-10	2.40748e-10	0.1245	-9.25879e-11	-1.00295e-10	-9.26425e-11	-1.00277e-10	-1.08003e-10	-9.7236e-11	-8.81582e-11	-1.11107e-10	-1.01848e-10	0.501495	-3.55e-11	-9.25e-12	2.93e-11	3.7e-11	6.02e-11	6.33e-11	9.1e-11	1.03e-10	1.47e-10	0.1245	-1.57417e-09	-1.59265e-09	-1.58965e-09	-1.56799e-09	-1.55708e-09	-1.56648e-09	-1.56329e-09	-1.55414e-09	-1.59745e-09	0.501495	-1.85222e-11	1.07968e-11	1.69733e-11	4.32086e-11	5.40127e-11	6.48213e-11	9.25936e-11	1.01857e-10	1.46607e-10
0.5025	-4.01259e-11	-1.5461e-12	1.08041e-11	1.54272e-11	2.46982e-11	6.32729e-11	9.10554e-11	1.3427e-10	2.36124e-10	0.12475	-9.41221e-11	-9.57382e-11	-9.56836e-11	-9.87792e-11	-1.00368e-10	-9.26789e-11	-1.00268e-10	-1.09555e-10	-1.01848e-10	0.5025	-3.09e-11	3.08e-12	3.24e-11	4.32e-11	6.64e-11	6.33e-11	8.03e-11	1.03e-10	1.37e-10	0.12475	-1.57872e-09	-1.59571e-09	-1.59415e-09	-1.56949e-09	-1.55408e-09	-1.56337e-09	-1.56185e-09	-1.55256e-09	-1.6141e-09	0.5025	-1.85188e-11	-1.53709e-12	1.85194e-11	3.85838e-11	5.24728e-11	6.79017e-11	9.2597e-11	1.03398e-10	1.37356e-10
0.503505	-3.85815e-11	-3.08488e-12	1.69727e-11	9.25857e-12	3.24073e-11	6.32752e-11	9.10481e-11	1.40438e-10	2.3612e-10	0.125	-9.25697e-11	-1.0025e-10	-9.87792e-11	-9.87701e-11	-1.0182e-10	-1.01766e-10	-1.04889e-10	-1.04925e-10	-1.00332e-10	0.503505	-1.39e-11	1.55e-12	2.32e-11	3.7e-11	5.4e-11	6.33e-11	8.95e-11	9.26e-11	1.31e-10	0.125	-1.57415e-09	-1.59116e-09	-1.5881e-09	-1.56642e-09	-1.5495e-09	-1.56488e-09	-1.56785e-09	-1.55416e-09	-1.60196e-09	0.503505	-1.69722e-11	3.08826e-12	2.00661e-11	3.85827e-11	5.40127e-11	6.32741e-11	9.25953e-11	9.87718e-11	1.37347e-10
0.50451	-3.55e-11	-2.25211e-15	1.38901e-11	6.19332e-15	3.54972e-11	6.48128e-11	7.56327e-11	1.4506e-10	2.28409e-10	0.12525	-8.64967e-11	-9.41676e-11	-1.03364e-10	-9.87428e-11	-9.73087e-11	-9.57564e-11	-1.00386e-10	-9.73724e-11	-1.01911e-10	0.50451	-2.01e-11	1.39e-11	2.47e-11	3.4e-11	4.78e-11	6.02e-11	6.33e-11	9.26e-11	1.3e-10	0.12525	-1.56958e-09	-1.5927e-09	-1.59263e-09	-1.56183e-09	-1.55256e-09	-1.56496e-09	-1.55271e-09	-1.56788e-09	-1.59431e-09	0.50451	-4.63604e-12	1.23401e-11	3.08589e-11	4.01271e-11	4.93862e-11	5.71037e-11	8.79666e-11	9.87701e-11	1.23469e-10
0.505515	-4.47496e-11	-3.08319e-12	1.23451e-11	7.71473e-12	4.32091e-11	5.2475e-11	9.2588e-11	1.26557e-10	2.28408e-10	0.1255	-9.25879e-11	-9.26243e-11	-1.0182e-10	-9.4204e-11	-1.06386e-10	-1.01839e-10	-1.07957e-10	-1.14057e-10	-1.12532e-10	0.505515	-1.23e-11	4.64e-12	3.09e-11	4.17e-11	4.63e-11	5.56e-11	7.41e-11	9.88e-11	1.22e-10	0.1255	-1.5756e-09	-1.6003e-09	-1.59106e-09	-1.56191e-09	-1.55864e-09	-1.57709e-09	-1.56479e-09	-1.56489e-09	-1.60336e-09	0.505515	-9.2597e-12	4.63041e-12	2.31526e-11	4.62895e-11	4.78446e-11	5.70992e-11	8.17968e-11	9.87746e-11	1.2809e-10
0.50652	-3.85821e-11	3.08657e-12	7.71304e-12	1.08041e-11	4.32102e-11	4.93856e-11	8.48806e-11	1.28095e-10	2.34577e-10	0.12575	-9.71268e-11	-9.56472e-11	-9.42131e-11	-1.00204e-10	-9.88702e-11	-1.0488e-10	-1.03445e-10	-1.06559e-10	-1.01966e-10	0.50652	-7.72e-12	1.39e-11	2.32e-11	2.93e-11	5.71e-11	6.02e-11	6.64e-11	9.88e-11	1.37e-10	0.12575	-1.56651e-09	-1.59424e-09	-1.57884e-09	-1.58007e-09	-1.55262e-09	-1.56499e-09	-1.56025e-09	-1.56178e-09	-1.59426e-09	0.50652	-1.38862e-11	-1.54159e-12	2.46903e-11	2.77875e-11	5.40138e-11	5.093e-11	8.33339e-11	1.11109e-10	1.26554e-10
0.507525	-3.2409e-11	9.2552e-12	-6.16581e-12	1.69744e-11	3.85849e-11	4.78424e-11	7.7167e-11	1.35803e-10	2.34576e-10	0.126	-8.50171e-11	-9.26516e-11	-9.86883e-11	-8.8049e-11	-1.07912e-10	-9.72815e-11	-1.06441e-10	-1.11016e-10	-1.09528e-10	0.507525	-7.72e-12	6.18e-12	2.31e-11	2.78e-11	4.94e-11	4.94e-11	6.48e-11	9.72e-11	1.36e-10	0.126	-1.57109e-09	-1.59264e-09	-1.57724e-09	-1.55578e-09	-1.55869e-09	-1.56951e-09	-1.55413e-09	-1.55411e-09	-1.59267e-09	0.507525	-9.2642e-12	-3.08263e-12	2.00666e-11	3.2405e-11	5.70981e-11	4.93851e-11	7.56254e-11	1.01862e-10	1.3889e-10
0.50853	-2.62409e-11	3.0815e-12	-4.50423e-15	1.85188e-11	4.16687e-11	4.7844e-11	7.71625e-11	1.28094e-10	2.25322e-10	0.12625	-9.56108e-11	-9.87247e-11	-8.96378e-11	-8.95195e-11	-9.73269e-11	-9.87428e-11	-1.01911e-10	-9.88793e-11	-1.09564e-10	0.50853	-1.08e-11	1.08e-11	2.01e-11	2.01e-11	4.17e-11	6.33e-11	6.94e-11	1.03e-10	1.31e-10	0.12625	-1.58024e-09	-1.58657e-09	-1.57575e-09	-1.55715e-09	-1.56024e-09	-1.57253e-09	-1.55558e-09	-1.55108e-09	-1.59111e-09	0.50853	-1.69711e-11	6.16413e-12	2.62313e-11	2.62386e-11	5.09284e-11	4.78452e-11	8.02491e-11	1.08026e-10	1.37356e-10
0.509535	-3.39489e-11	-1.69682e-11	-6.17201e-12	1.85217e-11	4.47518e-11	5.40093e-11	7.25416e-11	1.23463e-10	2.22232e-10	0.1265	-9.41676e-11	-9.71996e-11	-1.01775e-10	-9.26152e-11	-1.03327e-10	-9.57291e-11	-1.06477e-10	-1.04934e-10	-1.08021e-10	0.509535	-1.08e-11	7.72e-12	2.01e-11	1.7e-11	4.63e-11	7.1e-11	6.64e-11	1.22e-10	1.33e-10	0.1265	-1.57567e-09	-1.5926e-09	-1.58335e-09	-1.5542e-09	-1.55876e-09	-1.56342e-09	-1.54948e-09	-1.56169e-09	-1.58656e-09	0.509535	-1.08041e-11	-9.25463e-12	2.00627e-11	2.77752e-11	4.47586e-11	5.55548e-11	8.02479e-11	1.03407e-10	1.46607e-10
0.51054	-3.24056e-11	-1.54334e-11	-9.25801e-12	2.46903e-11	3.85872e-11	4.47563e-11	8.79576e-11	1.18837e-10	2.16063e-10	0.12675	-9.71814e-11	-9.10901e-11	-1.0035e-10	-9.86883e-11	-9.72723e-11	-1.00341e-10	-1.095e-10	-1.09509e-10	-1.04961e-10	0.51054	-6.17e-12	1.08e-11	9.26e-12	1.85e-11	3.4e-11	7.1e-11	8.02e-11	1.22e-10	1.34e-10	0.12675	-1.56793e-09	-1.58808e-09	-1.5803e-09	-1.56937e-09	-1.56484e-09	-1.56641e-09	-1.54794e-09	-1.55413e-09	-1.59261e-09	0.51054	-7.71754e-12	-1.0803e-11	1.38935e-11	1.85211e-11	4.78378e-11	5.40144e-11	7.25354e-11	1.17283e-10	1.41985e-10
0.511545	-2.1611e-11	-1.54351e-11	-7.71698e-12	2.46931e-11	4.62946e-11	3.859e-11	7.7167e-11	1.26545e-10	2.17604e-10	0.127	-9.26789e-11	-9.11083e-11	-1.04852e-10	-9.11265e-11	-9.8852e-11	-1.09446e-10	-1.00368e-10	-1.03491e-10	-1.04961e-10	0.511545	-6.18e-12	-3.08e-12	4.63e-12	2.47e-11	2.78e-11	7.87e-11	8.03e-11	1.22e-10	1.45e-10	0.127	-1.55271e-09	-1.59116e-09	-1.57268e-09	-1.56041e-09	-1.56332e-09	-1.56645e-09	-1.55098e-09	-1.55405e-09	-1.58965e-09	0.511545	-7.72148e-12	-1.23491e-11	1.85177e-11	1.38929e-11	4.01304e-11	5.0934e-11	6.79079e-11	1.12663e-10	1.45071e-10
0.51255	-2.46892e-11	-2.16037e-11	-7.71191e-12	2.62358e-11	4.32102e-11	5.40082e-11	7.40793e-11	1.23464e-10	2.20688e-10	0.12725	-1.01775e-10	-1.00286e-10	-9.42404e-11	-9.56563e-11	-1.14039e-10	-9.73815e-11	-1.00323e-10	-1.12541e-10	-1.07948e-10	0.51255	-1.85e-11	-1.08e-11	3.09e-12	2.78e-11	3.55e-11	8.18e-11	8.95e-11	1.23e-10	1.37e-10	0.12725	-1.56487e-09	-1.6003e-09	-1.5772e-09	-1.57555e-09	-1.5572e-09	-1.56955e-09	-1.55092e-09	-1.54805e-09	-1.59717e-09	0.51255	-2.1597e-11	-2.16003e-11	1.85155e-11	1.85166e-11	4.62918e-11	6.32707e-11	7.25332e-11	1.15747e-10	1.54322e-10
0.513555	-1.85245e-11	-2.16048e-11	4.62422e-12	2.77808e-11	3.55034e-11	5.09306e-11	7.56226e-11	1.23465e-10	2.2069e-10	0.1275	-9.72723e-11	-1.04861e-10	-1.00232e-10	-9.56745e-11	-1.01939e-10	-1.11044e-10	-1.01848e-10	-1.01984e-10	-9.72906e-11	0.513555	-2.16e-11	-9.26e-12	3.08e-12	2.47e-11	3.55e-11	8.02e-11	8.95e-11	1.25e-10	1.42e-10	0.1275	-1.57409e-09	-1.59574e-09	-1.57568e-09	-1.56652e-09	-1.55568e-09	-1.5772e-09	-1.53722e-09	-1.56477e-09	-1.58345e-09	0.513555	-1.08103e-11	-1.54311e-11	7.72092e-12	1.54357e-11	3.39567e-11	6.48202e-11	7.4081e-11	1.20374e-10	1.46617e-10
0.51456	-2.6233e-11	-1.85233e-11	1.54722e-12	3.39455e-11	4.93732e-11	5.40161e-11	8.1794e-11	1.29635e-10	2.22231e-10	0.12775	-1.00286e-10	-9.57746e-11	-9.26425e-11	-9.41221e-11	-1.03427e-10	-1.1266e-10	-1.01884e-10	-1.12551e-10	-9.72451e-11	0.51456	-3.7e-11	-1.23e-11	-3.08e-12	3.55e-11	3.4e-11	7.41e-11	9.11e-11	1.28e-10	1.5e-10	0.12775	-1.57258e-09	-1.58812e-09	-1.57264e-09	-1.57258e-09	-1.56178e-09	-1.57877e-09	-1.54178e-09	-1.56178e-09	-1.57734e-09	0.51456	-2.00616e-11	-4.63717e-12	9.25745e-12	2.0061e-11	3.39528e-11	7.25309e-11	8.48761e-11	1.20375e-10	1.52786e-10
0.515565	-2.62341e-11	-2.62319e-11	9.25689e-12	2.16122e-11	3.08752e-11	6.01864e-11	8.79666e-11	1.34264e-10	2.17608e-10	0.128	-9.8852e-11	-1.01811e-10	-9.26243e-11	-8.95559e-11	-1.09564e-10	-1.14167e-10	-1.06396e-10	-1.04943e-10	-1.00295e-10	0.515565	-3.09e-11	-1.23e-11	3.09e-12	4.17e-11	4.17e-11	7.25e-11	8.95e-11	1.23e-10	1.39e-10	0.128	-1.56644e-09	-1.59416e-09	-1.57566e-09	-1.57409e-09	-1.56326e-09	-1.57872e-09	-1.55247e-09	-1.55573e-09	-1.58787e-09	0.515565	-2.62347e-11	-1.38811e-11	4.6321e-12	2.00666e-11	3.54972e-11	7.09922e-11	8.33384e-11	1.1729e-10	1.62039e-10
0.51657	-2.16122e-11	-2.31493e-11	9.25801e-12	2.62302e-11	3.85748e-11	6.17319e-11	9.25959e-11	1.34268e-10	2.26863e-10	0.12825	-1.1098e-10	-1.0035e-10	-9.72269e-11	-9.25697e-11	-1.14148e-10	-1.0961e-10	-9.57655e-11	-9.72451e-11	-1.00304e-10	0.51657	-3.86e-11	-2.16e-11	7.72e-12	3.4e-11	4.01e-11	8.33e-11	8.95e-11	1.16e-10	1.56e-10	0.12825	-1.56185e-09	-1.59118e-09	-1.57257e-09	-1.565e-09	-1.54963e-09	-1.56805e-09	-1.55104e-09	-1.56632e-09	-1.57116e-09	0.51657	-2.93207e-11	-2.81514e-15	6.17257e-12	3.08623e-11	4.16658e-11	7.25298e-11	8.48829e-11	1.14205e-10	1.54333e-10
0.517575	-3.39477e-11	-2.00616e-11	4.63435e-12	1.54396e-11	2.62409e-11	6.48168e-11	9.4138e-11	1.40437e-10	2.36121e-10	0.1285	-1.00368e-10	-1.04907e-10	-1.01784e-10	-9.11174e-11	-1.09546e-10	-1.11116e-10	-9.87883e-11	-9.26516e-11	-9.87792e-11	0.517575	-4.48e-11	-2.47e-11	1.85e-11	4.48e-11	5.71e-11	8.33e-11	8.95e-11	1.11e-10	1.51e-10	0.1285	-1.56483e-09	-1.59725e-09	-1.56351e-09	-1.57405e-09	-1.5648e-09	-1.56955e-09	-1.55556e-09	-1.55882e-09	-1.57107e-09	0.517575	-2.77774e-11	6.17088e-12	6.17708e-12	3.24095e-11	4.01271e-11	6.1742e-11	9.25919e-11	1.17288e-10	1.58953e-10
0.51858	-3.39534e-11	-1.38901e-11	1.23429e-11	2.31431e-11	2.77769e-11	6.4819e-11	8.95155e-11	1.40439e-10	2.40747e-10	0.12875	-9.87792e-11	-1.03345e-10	-9.42222e-11	-1.00222e-10	-1.00404e-10	-1.12614e-10	-1.0487e-10	-9.7236e-11	-9.88156e-11	0.51858	-4.17e-11	-1.39e-11	1.54e-11	4.48e-11	5.09e-11	8.02e-11	9.88e-11	1.11e-10	1.44e-10	0.12875	-1.55724e-09	-1.59578e-09	-1.5817e-09	-1.56642e-09	-1.56487e-09	-1.57565e-09	-1.5479e-09	-1.56789e-09	-1.57252e-09	0.51858	-2.16088e-11	6.17032e-12	1.69699e-11	3.5495e-11	4.32136e-11	8.02378e-11	8.64278e-11	1.17289e-10	1.49701e-10
0.519585	-3.70377e-11	-9.26139e-12	1.0803e-11	1.38946e-11	2.31515e-11	6.79039e-11	9.87645e-11	1.40441e-10	2.31499e-10	0.129	-9.87883e-11	-9.27153e-11	-1.00241e-10	-9.41767e-11	-1.06459e-10	-1.06523e-10	-9.88338e-11	-1.03318e-10	-1.06432e-10	0.519585	-3.86e-11	-9.26e-12	2.16e-11	4.32e-11	6.17e-11	7.41e-11	9.26e-11	1.11e-10	1.5e-10	0.129	-1.56019e-09	-1.59878e-09	-1.57268e-09	-1.55726e-09	-1.56179e-09	-1.5741e-09	-1.53872e-09	-1.5619e-09	-1.56042e-09	0.519585	-2.31526e-11	-1.53934e-12	1.08075e-11	3.70388e-11	5.09255e-11	6.32814e-11	9.10503e-11	1.15742e-10	1.48154e-10
0.52059	-3.70422e-11	-9.2597e-12	9.26252e-12	1.85138e-11	2.46914e-11	6.94455e-11	9.25993e-11	1.46606e-10	2.40751e-10	0.12925	-1.01811e-10	-1.01748e-10	-9.41767e-11	-9.42222e-11	-1.08021e-10	-1.06505e-10	-1.03355e-10	-9.57837e-11	-1.04961e-10	0.52059	-3.09e-11	-7.71e-12	2.01e-11	4.32e-11	5.56e-11	6.48e-11	8.95e-11	1.03e-10	1.4e-10	0.12925	-1.55107e-09	-1.59113e-09	-1.57566e-09	-1.56336e-09	-1.55721e-09	-1.56495e-09	-1.54026e-09	-1.57243e-09	-1.57557e-09	0.52059	-3.39449e-11	1.54554e-12	1.69722e-11	3.85832e-11	5.09272e-11	6.48213e-11	8.64295e-11	1.03405e-10	1.43528e-10
0.521595	-4.62934e-11	-9.25857e-12	1.54311e-11	7.72261e-12	2.31509e-11	6.48196e-11	9.26004e-11	1.37354e-10	2.46924e-10	0.1295	-9.72723e-11	-9.27062e-11	-9.41312e-11	-1.07866e-10	-1.08075e-10	-1.09555e-10	-1.00377e-10	-1.04825e-10	-1.06441e-10	0.521595	-2.62e-11	-2.82e-15	2.62e-11	4.78e-11	5.71e-11	5.56e-11	8.33e-11	1e-10	1.42e-10	0.1295	-1.55401e-09	-1.58503e-09	-1.57264e-09	-1.57248e-09	-1.55869e-09	-1.56641e-09	-1.5524e-09	-1.55418e-09	-1.57111e-09	0.521595	-2.46931e-11	1.0799e-11	1.23508e-11	4.32086e-11	4.78424e-11	7.56124e-11	9.72224e-11	1.03399e-10	1.46606e-10
0.5226	-4.16703e-11	-6.17651e-12	1.69727e-11	1.38862e-11	2.62369e-11	6.4819e-11	1.01849e-10	1.3273e-10	2.48465e-10	0.12975	-1.00313e-10	-1.01784e-10	-9.2597e-11	-9.42313e-11	-1.15673e-10	-1.09546e-10	-1.07939e-10	-9.42495e-11	-1.00395e-10	0.5226	-2.01e-11	5.07e-15	2.32e-11	5.25e-11	5.86e-11	5.71e-11	7.72e-11	9.88e-11	1.45e-10	0.12975	-1.54491e-09	-1.59262e-09	-1.57567e-09	-1.56031e-09	-1.55563e-09	-1.5634e-09	-1.5403e-09	-1.55109e-09	-1.57414e-09	0.5226	-1.69789e-11	9.25632e-12	2.00582e-11	3.85827e-11	4.63002e-11	6.32791e-11	9.5683e-11	1.01854e-10	1.3427e-10
0.523605	-4.16687e-11	-1.23395e-11	9.26477e-12	1.08047e-11	3.24095e-11	6.79005e-11	9.1056e-11	1.4969e-10	2.40755e-10	0.13	-1.03391e-10	-9.87883e-11	-9.10173e-11	-9.56927e-11	-1.11153e-10	-1.04998e-10	-1.00295e-10	-1.01875e-10	-1.07939e-10	0.523605	-1.23e-11	1.39e-11	3.55e-11	3.24e-11	6.33e-11	5.09e-11	8.18e-11	9.88e-11	1.28e-10	0.13	-1.54936e-09	-1.59269e-09	-1.57565e-09	-1.55575e-09	-1.5526e-09	-1.56946e-09	-1.54477e-09	-1.5633e-09	-1.57563e-09	0.523605	-1.69739e-11	-1.53991e-12	1.54362e-11	3.55023e-11	4.93896e-11	6.32724e-11	9.2597e-11	9.4142e-11	1.34263e-10
0.52461	-4.16675e-11	-5.06726e-15	1.54266e-11	1.23429e-11	4.01237e-11	6.01914e-11	8.64244e-11	1.43526e-10	2.40752e-10	0.13025	-1.04934e-10	-9.88065e-11	-8.34101e-11	-9.8761e-11	-1.12587e-10	-1.09555e-10	-8.96105e-11	-1.12523e-10	-1.00414e-10	0.52461	-1.23e-11	9.26e-12	3.09e-11	3.86e-11	6.64e-11	5.09e-11	7.41e-11	8.95e-11	1.27e-10	0.13025	-1.53726e-09	-1.59569e-09	-1.56802e-09	-1.57089e-09	-1.55863e-09	-1.56487e-09	-1.54025e-09	-1.5679e-09	-1.56656e-09	0.52461	-1.08047e-11	-3.08431e-12	2.00655e-11	5.09165e-11	6.48089e-11	5.71032e-11	8.95121e-11	9.10582e-11	1.26552e-10
0.525615	-3.85838e-11	-1.54554e-12	4.63435e-12	4.63492e-12	4.32091e-11	6.17268e-11	8.33379e-11	1.40437e-10	2.39208e-10	0.1305	-1.04961e-10	-1.04889e-10	-8.79763e-11	-1.00313e-10	-1.01939e-10	-1.11053e-10	-9.55926e-11	-1.00341e-10	-1.095e-10	0.525615	-4.63e-12	1.54e-11	1.85e-11	2.78e-11	5.4e-11	4.78e-11	6.33e-11	1e-10	1.28e-10	0.1305	-1.55088e-09	-1.58805e-09	-1.56796e-09	-1.55721e-09	-1.55105e-09	-1.55727e-09	-1.5448e-09	-1.56031e-09	-1.57873e-09	0.525615	-9.26252e-12	1.54441e-12	3.24028e-11	3.39607e-11	5.5561e-11	5.55588e-11	9.10503e-11	1.00309e-10	1.26551e-10
0.52662	-4.01192e-11	-9.25632e-12	6.17088e-12	1.08052e-11	3.85872e-11	5.09334e-11	8.1794e-11	1.32725e-10	2.36123e-10	0.13075	-1.08012e-10	-1.01848e-10	-9.40311e-11	-1.01848e-10	-1.04961e-10	-1.01939e-10	-8.65331e-11	-9.26425e-11	-1.06477e-10	0.52662	-9.26e-12	1.85e-11	2.31e-11	3.55e-11	5.56e-11	5.71e-11	6.48e-11	9.88e-11	1.27e-10	0.13075	-1.54485e-09	-1.58187e-09	-1.56491e-09	-1.5495e-09	-1.55099e-09	-1.56633e-09	-1.54484e-09	-1.56026e-09	-1.58333e-09	0.52662	-1.54261e-11	9.25238e-12	2.77814e-11	4.01192e-11	5.40115e-11	5.55565e-11	8.33379e-11	9.87713e-11	1.31183e-10
0.527625	-2.46993e-11	-7.71811e-12	1.54497e-12	2.31459e-11	4.78333e-11	5.40099e-11	8.02485e-11	1.31179e-10	2.34584e-10	0.131	-1.07993e-10	-9.72451e-11	-8.19123e-11	-1.0182e-10	-1.11071e-10	-1.06441e-10	-9.56199e-11	-9.26152e-11	-1.01875e-10	0.527625	-7.71e-12	7.72e-12	2.62e-11	1.54e-11	4.78e-11	5.86e-11	7.56e-11	1.02e-10	1.31e-10	0.131	-1.54336e-09	-1.57726e-09	-1.5649e-09	-1.54955e-09	-1.54949e-09	-1.55877e-09	-1.54635e-09	-1.5602e-09	-1.5742e-09	0.527625	-3.09558e-12	-3.0815e-12	2.93184e-11	2.93263e-11	4.32176e-11	5.09295e-11	7.71681e-11	1.00316e-10	1.46605e-10
0.52863	-2.77774e-11	-1.07996e-11	1.54047e-12	2.62353e-11	3.39573e-11	4.32176e-11	7.25383e-11	1.28091e-10	2.45374e-10	0.13125	-1.01866e-10	-9.56563e-11	-8.94104e-11	-9.57746e-11	-1.09564e-10	-1.03436e-10	-9.41403e-11	-9.56563e-11	-1.00359e-10	0.52863	-1.55e-12	1.08e-11	2.16e-11	2.16e-11	4.17e-11	5.86e-11	7.25e-11	1.11e-10	1.34e-10	0.13125	-1.55393e-09	-1.57722e-09	-1.56647e-09	-1.56477e-09	-1.55402e-09	-1.5603e-09	-1.5448e-09	-1.54952e-09	-1.57419e-09	0.52863	-1.543e-11	-1.54554e-12	2.00649e-11	2.93218e-11	4.78412e-11	4.93856e-11	8.17906e-11	1.09572e-10	1.41982e-10
0.529635	-2.62358e-11	-4.63548e-12	-6.17032e-12	2.77769e-11	3.39534e-11	4.78378e-11	7.56192e-11	1.20382e-10	2.33037e-10	0.1315	-9.72906e-11	-8.95286e-11	-8.03235e-11	-1.04852e-10	-1.06505e-10	-1.06477e-10	-9.25879e-11	-9.41585e-11	-1.0645e-10	0.529635	-7.71e-12	1.54e-12	9.26e-12	2.01e-11	3.86e-11	6.48e-11	7.72e-11	1.14e-10	1.42e-10	0.1315	-1.53878e-09	-1.57413e-09	-1.57404e-09	-1.56031e-09	-1.54803e-09	-1.56792e-09	-1.53872e-09	-1.54947e-09	-1.58019e-09	0.529635	-2.00599e-11	-6.17539e-12	1.69761e-11	2.7778e-11	5.09244e-11	4.93885e-11	7.71636e-11	1.15744e-10	1.37354e-10
0.53064	-2.46925e-11	-1.38884e-11	-6.17201e-12	2.31538e-11	3.70399e-11	4.16698e-11	7.40782e-11	1.29629e-10	2.23779e-10	0.13175	-1.03273e-10	-8.64694e-11	-8.32827e-11	-9.88156e-11	-1.06459e-10	-1.08012e-10	-8.95832e-11	-9.56745e-11	-1.06477e-10	0.53064	-7.72e-12	-3.09e-12	7.72e-12	1.39e-11	3.7e-11	6.33e-11	8.03e-11	1.1e-10	1.44e-10	0.13175	-1.54477e-09	-1.56812e-09	-1.56343e-09	-1.56329e-09	-1.56161e-09	-1.56646e-09	-1.5432e-09	-1.55108e-09	-1.56501e-09	0.53064	-1.69733e-11	-1.69716e-11	1.38896e-11	2.3147e-11	4.32142e-11	5.86425e-11	7.09933e-11	1.15749e-10	1.38899e-10
0.531645	-2.31515e-11	-2.00587e-11	-3.08995e-12	3.08606e-11	4.32097e-11	3.85877e-11	7.40799e-11	1.18841e-10	2.22233e-10	0.132	-8.80854e-11	-9.10264e-11	-7.72734e-11	-1.00304e-10	-1.01911e-10	-1.06468e-10	-9.86883e-11	-9.56745e-11	-1.04952e-10	0.531645	-2.01e-11	-7.71e-12	1.08e-11	2.01e-11	3.86e-11	7.25e-11	8.33e-11	1.1e-10	1.42e-10	0.132	-1.54175e-09	-1.58626e-09	-1.5664e-09	-1.55717e-09	-1.54339e-09	-1.56948e-09	-1.53405e-09	-1.56631e-09	-1.5696e-09	0.531645	-6.18271e-12	-1.54357e-11	1.08041e-11	1.23519e-11	4.16664e-11	6.17297e-11	7.09916e-11	1.21912e-10	1.49692e-10
0.53265	-2.77769e-11	-1.54385e-11	-9.25294e-12	2.46976e-11	4.32097e-11	5.09216e-11	8.02468e-11	1.31173e-10	2.20688e-10	0.13225	-9.2597e-11	-9.10901e-11	-8.94104e-11	-1.00323e-10	-1.0645e-10	-1.01857e-10	-9.41403e-11	-9.41403e-11	-1.0498e-10	0.53265	-1.39e-11	-7.72e-12	4.63e-12	2.32e-11	3.86e-11	6.79e-11	8.64e-11	1.25e-10	1.45e-10	0.13225	-1.54027e-09	-1.56509e-09	-1.56341e-09	-1.55112e-09	-1.5433e-09	-1.56641e-09	-1.52938e-09	-1.56025e-09	-1.58785e-09	0.53265	-2.15998e-11	-2.15992e-11	1.08013e-11	1.69744e-11	3.39556e-11	6.01886e-11	7.25349e-11	1.08035e-10	1.41986e-10
0.533655	-2.62341e-11	-2.62308e-11	3.07925e-12	3.2405e-11	3.70411e-11	4.47609e-11	7.56282e-11	1.26553e-10	2.14525e-10	0.1325	-9.71996e-11	-9.71723e-11	-8.49352e-11	-1.01884e-10	-1.04907e-10	-9.73087e-11	-8.95923e-11	-9.25788e-11	-1.11089e-10	0.533655	-2.47e-11	-1.39e-11	1.13e-15	2.93e-11	3.4e-11	8.33e-11	9.72e-11	1.19e-10	1.51e-10	0.1325	-1.55093e-09	-1.57716e-09	-1.57103e-09	-1.56479e-09	-1.54637e-09	-1.55881e-09	-1.52331e-09	-1.55259e-09	-1.57424e-09	0.533655	-2.00632e-11	-9.26477e-12	6.17708e-12	1.69778e-11	3.54938e-11	6.0192e-11	7.56209e-11	1.09577e-10	1.4507e-10
0.53466	-2.00661e-11	-2.31504e-11	-4.62422e-12	2.93258e-11	3.70354e-11	5.40099e-11	9.1047e-11	1.31179e-10	2.31489e-10	0.13275	-9.71541e-11	-9.4113e-11	-8.94558e-11	-1.07966e-10	-9.72906e-11	-1.0645e-10	-9.86883e-11	-8.80309e-11	-1.12614e-10	0.53466	-3.39e-11	-1.85e-11	-1.54e-12	3.4e-11	4.47e-11	7.87e-11	9.41e-11	1.2e-10	1.47e-10	0.13275	-1.54942e-09	-1.57725e-09	-1.57254e-09	-1.5618e-09	-1.54945e-09	-1.56632e-09	-1.53243e-09	-1.55255e-09	-1.57568e-09	0.53466	-2.00632e-11	-1.08002e-11	1.23401e-11	2.16043e-11	3.24095e-11	7.09865e-11	7.87108e-11	1.21917e-10	1.52781e-10
0.535665	-2.31476e-11	-2.31509e-11	3.08488e-12	3.54916e-11	2.77859e-11	4.93896e-11	8.79688e-11	1.34267e-10	2.37662e-10	0.133	-8.49807e-11	-8.6524e-11	-8.49261e-11	-1.03418e-10	-1.00304e-10	-1.09537e-10	-9.42313e-11	-9.40948e-11	-1.06541e-10	0.535665	-3.24e-11	-2.16e-11	-5.63e-16	3.24e-11	4.01e-11	7.87e-11	8.33e-11	1.25e-10	1.62e-10	0.133	-1.54179e-09	-1.58027e-09	-1.5634e-09	-1.55876e-09	-1.55102e-09	-1.5557e-09	-1.53245e-09	-1.55409e-09	-1.57568e-09	0.535665	-2.16065e-11	-4.63041e-12	1.5461e-12	2.16099e-11	3.08691e-11	6.94506e-11	9.1047e-11	1.28087e-10	1.49699e-10
0.53667	-2.16139e-11	-2.77729e-11	6.17313e-12	3.08668e-11	3.7032e-11	5.70981e-11	8.95093e-11	1.40435e-10	2.34581e-10	0.13325	-8.95104e-11	-9.56108e-11	-8.7949e-11	-1.01866e-10	-1.0182e-10	-1.06468e-10	-1.04807e-10	-9.25606e-11	-1.09491e-10	0.53667	-4.01e-11	-2.31e-11	1.13e-15	3.24e-11	4.63e-11	7.25e-11	8.33e-11	1.2e-10	1.56e-10	0.13325	-1.54175e-09	-1.57414e-09	-1.56336e-09	-1.56329e-09	-1.55555e-09	-1.55717e-09	-1.52794e-09	-1.55563e-09	-1.57414e-09	0.53667	-2.46931e-11	-5.63029e-16	-1.54103e-12	3.24028e-11	3.85793e-11	7.56186e-11	8.48829e-11	1.18836e-10	1.46615e-10
0.537675	-4.16591e-11	-1.54368e-11	9.26252e-12	2.93196e-11	2.77802e-11	5.5561e-11	8.79717e-11	1.37355e-10	2.37665e-10	0.1335	-9.40948e-11	-9.26061e-11	-8.79399e-11	-1.01829e-10	-9.72723e-11	-1.00395e-10	-9.26698e-11	-8.49807e-11	-9.88611e-11	0.537675	-3.7e-11	-1.7e-11	3.09e-12	4.78e-11	4.63e-11	7.87e-11	9.72e-11	1.13e-10	1.5e-10	0.1335	-1.5433e-09	-1.56652e-09	-1.56634e-09	-1.55873e-09	-1.54646e-09	-1.55868e-09	-1.53858e-09	-1.55715e-09	-1.57108e-09	0.537675	-2.9323e-11	3.08488e-12	1.54103e-12	2.62414e-11	3.85821e-11	7.56209e-11	8.48845e-11	1.18834e-10	1.52784e-10
0.53868	-3.54989e-11	-1.38896e-11	2.00576e-11	2.00638e-11	2.16071e-11	6.17291e-11	9.87634e-11	1.41983e-10	2.37665e-10	0.13375	-9.11083e-11	-9.1081e-11	-8.3401e-11	-9.72451e-11	-1.00304e-10	-1.07939e-10	-9.25606e-11	-9.40675e-11	-1.03373e-10	0.53868	-4.01e-11	-1.7e-11	1.85e-11	4.01e-11	4.94e-11	7.1e-11	9.72e-11	1.16e-10	1.5e-10	0.13375	-1.54796e-09	-1.57407e-09	-1.5542e-09	-1.55718e-09	-1.55255e-09	-1.55412e-09	-1.53715e-09	-1.55565e-09	-1.57104e-09	0.53868	-3.54899e-11	1.54497e-12	-1.54047e-12	3.54921e-11	3.85838e-11	7.56203e-11	9.5678e-11	1.21915e-10	1.55868e-10
0.539685	-3.85832e-11	-1.23468e-11	1.69756e-11	1.38901e-11	1.85217e-11	6.17313e-11	9.10565e-11	1.49692e-10	2.34581e-10	0.134	-9.71268e-11	-9.40766e-11	-8.94649e-11	-9.57291e-11	-1.01829e-10	-1.00359e-10	-8.65422e-11	-9.11447e-11	-1.03409e-10	0.539685	-3.86e-11	-1.54e-11	2.78e-11	4.78e-11	5.4e-11	7.41e-11	9.41e-11	1.05e-10	1.47e-10	0.134	-1.56015e-09	-1.56803e-09	-1.56176e-09	-1.55719e-09	-1.56013e-09	-1.55564e-09	-1.54164e-09	-1.55722e-09	-1.56802e-09	0.539685	-2.6242e-11	4.62985e-12	3.08657e-12	3.54944e-11	4.32102e-11	7.40748e-11	9.10577e-11	1.1266e-10	1.48154e-10
0.54069	-4.47479e-11	-1.23451e-11	1.23463e-11	9.2642e-12	2.1606e-11	6.1733e-11	9.1056e-11	1.40443e-10	2.37665e-10	0.13425	-8.65149e-11	-8.64512e-11	-8.79945e-11	-1.01829e-10	-9.87883e-11	-1.00295e-10	-1.00232e-10	-1.03273e-10	-1.04943e-10	0.54069	-3.4e-11	-7.72e-12	1.7e-11	4.78e-11	5.56e-11	7.41e-11	9.26e-11	1.1e-10	1.48e-10	0.13425	-1.55418e-09	-1.57104e-09	-1.56179e-09	-1.56025e-09	-1.54642e-09	-1.55871e-09	-1.52949e-09	-1.56631e-09	-1.57261e-09	0.54069	-3.39444e-11	7.71698e-12	7.72036e-12	3.24135e-11	4.32153e-11	6.48224e-11	9.72224e-11	1.04947e-10	1.35816e-10
0.541695	-3.08752e-11	-9.25857e-12	7.72092e-12	1.69699e-11	2.46959e-11	6.63595e-11	9.7224e-11	1.41983e-10	2.37665e-10	0.1345	-9.10173e-11	-8.34283e-11	-9.10537e-11	-1.034e-10	-9.88247e-11	-9.73087e-11	-1.00277e-10	-9.42131e-11	-1.06441e-10	0.541695	-3.39e-11	-4.63e-12	1.85e-11	3.7e-11	5.86e-11	5.71e-11	8.49e-11	1.06e-10	1.4e-10	0.1345	-1.56331e-09	-1.57106e-09	-1.56028e-09	-1.5618e-09	-1.54174e-09	-1.56027e-09	-1.53406e-09	-1.55578e-09	-1.57717e-09	0.541695	-2.00655e-11	1.23423e-11	2.31408e-11	4.16647e-11	5.24699e-11	6.79011e-11	9.10594e-11	1.08027e-10	1.41982e-10
0.5427	-4.32091e-11	-3.08882e-12	1.54295e-11	7.71923e-12	3.70315e-11	6.63595e-11	9.5683e-11	1.4661e-10	2.36126e-10	0.13475	-8.94922e-11	-9.55835e-11	-9.40675e-11	-1.04889e-10	-1.07912e-10	-1.07912e-10	-9.42313e-11	-9.71723e-11	-1.00359e-10	0.5427	-2.47e-11	7.71e-12	3.09e-11	3.55e-11	6.17e-11	6.02e-11	8.03e-11	9.57e-11	1.4e-10	0.13475	-1.56636e-09	-1.57104e-09	-1.56187e-09	-1.56335e-09	-1.53711e-09	-1.56331e-09	-1.54469e-09	-1.57094e-09	-1.57107e-09	0.5427	-1.38918e-11	6.17708e-12	1.54362e-11	4.01254e-11	5.7097e-11	6.17319e-11	1.00308e-10	1.03404e-10	1.4815e-10
0.543705	-4.78367e-11	-3.08657e-12	1.38896e-11	6.17482e-12	2.93275e-11	6.17308e-11	9.25942e-11	1.45066e-10	2.43834e-10	0.135	-8.49443e-11	-9.11083e-11	-8.49352e-11	-9.72815e-11	-9.72723e-11	-9.89066e-11	-1.03364e-10	-9.10719e-11	-1.01857e-10	0.543705	-1.85e-11	1.39e-11	2.78e-11	3.4e-11	5.56e-11	5.86e-11	7.56e-11	9.72e-11	1.37e-10	0.135	-1.55725e-09	-1.56796e-09	-1.574e-09	-1.56485e-09	-1.53257e-09	-1.56026e-09	-1.53258e-09	-1.56646e-09	-1.56643e-09	0.543705	-1.3889e-11	1.08007e-11	1.69772e-11	3.85827e-11	4.93913e-11	5.71043e-11	9.56858e-11	1.09568e-10	1.40442e-10
0.54471	-3.85855e-11	-3.08544e-12	1.23463e-11	9.26026e-12	3.54938e-11	5.5561e-11	8.17974e-11	1.35813e-10	2.37667e-10	0.13525	-9.10082e-11	-9.56654e-11	-8.48351e-11	-9.87792e-11	-9.41403e-11	-1.12514e-10	-1.06405e-10	-8.80672e-11	-1.03427e-10	0.54471	-2.01e-11	1.55e-12	2.93e-11	3.09e-11	4.94e-11	4.78e-11	7.41e-11	9.11e-11	1.31e-10	0.13525	-1.56177e-09	-1.56182e-09	-1.56185e-09	-1.56028e-09	-1.54316e-09	-1.55718e-09	-1.53711e-09	-1.56639e-09	-1.56191e-09	0.54471	-1.23446e-11	9.25576e-12	2.16071e-11	3.85838e-11	5.86425e-11	6.01841e-11	9.72246e-11	1.00318e-10	1.40438e-10
0.545715	-3.85821e-11	-5.63029e-16	1.08024e-11	1.38867e-11	3.70382e-11	5.71004e-11	8.02513e-11	1.38893e-10	2.34585e-10	0.1355	-8.95104e-11	-9.72087e-11	-7.72552e-11	-1.01793e-10	-9.11083e-11	-1.01966e-10	-9.57109e-11	-1.01757e-10	-1.09528e-10	0.545715	-9.27e-12	1.39e-11	3.09e-11	3.55e-11	5.71e-11	5.56e-11	7.25e-11	1.02e-10	1.33e-10	0.1355	-1.56024e-09	-1.55873e-09	-1.55726e-09	-1.55872e-09	-1.5326e-09	-1.55565e-09	-1.54162e-09	-1.55874e-09	-1.57556e-09	0.545715	-6.17876e-12	-3.0815e-12	2.93179e-11	4.32057e-11	6.17268e-11	5.24745e-11	9.25959e-11	1.03397e-10	1.37351e-10
0.54672	-3.85781e-11	1.53709e-12	7.71642e-12	1.08047e-11	3.70399e-11	5.55571e-11	8.02496e-11	1.3581e-10	2.46918e-10	0.13575	-8.79945e-11	-9.56836e-11	-8.48078e-11	-9.42131e-11	-9.71723e-11	-1.09473e-10	-8.95559e-11	-9.87428e-11	-1.08039e-10	0.54672	-1.7e-11	9.26e-12	2.62e-11	3.09e-11	5.86e-11	5.4e-11	7.1e-11	9.88e-11	1.33e-10	0.13575	-1.55567e-09	-1.55876e-09	-1.56791e-09	-1.5572e-09	-1.54161e-09	-1.55713e-09	-1.52637e-09	-1.55561e-09	-1.56643e-09	0.54672	-1.54261e-11	-1.54441e-12	2.46942e-11	3.08696e-11	5.24761e-11	5.24716e-11	8.48834e-11	9.87741e-11	1.29645e-10
0.547725	-2.77847e-11	-1.38834e-11	4.63041e-12	1.23491e-11	4.01254e-11	5.09267e-11	7.71653e-11	1.34263e-10	2.39211e-10	0.136	-9.10264e-11	-9.41312e-11	-8.03326e-11	-9.87519e-11	-9.42131e-11	-1.00368e-10	-9.1081e-11	-9.11356e-11	-1.08039e-10	0.547725	-1.39e-11	9.26e-12	1.85e-11	2.93e-11	5.4e-11	5.4e-11	6.64e-11	9.72e-11	1.36e-10	0.136	-1.5572e-09	-1.56633e-09	-1.56798e-09	-1.56027e-09	-1.52944e-09	-1.55103e-09	-1.52174e-09	-1.5496e-09	-1.55721e-09	0.547725	-6.17876e-12	-3.08544e-12	2.4692e-11	2.93235e-11	5.55565e-11	5.24716e-11	8.48738e-11	1.04942e-10	1.46603e-10
0.54873	-3.24078e-11	-1.23474e-11	3.08657e-12	2.16048e-11	4.32142e-11	4.16748e-11	7.71653e-11	1.25011e-10	2.36122e-10	0.13625	-8.94649e-11	-9.10719e-11	-8.94467e-11	-1.00277e-10	-1.03291e-10	-1.00295e-10	-9.7145e-11	-9.71723e-11	-1.09582e-10	0.54873	-9.26e-12	4.63e-12	1.39e-11	2.16e-11	4.32e-11	5.56e-11	7.41e-11	1.1e-10	1.39e-10	0.13625	-1.5633e-09	-1.55725e-09	-1.56791e-09	-1.56489e-09	-1.52485e-09	-1.5495e-09	-1.52781e-09	-1.56783e-09	-1.55413e-09	0.54873	-1.23446e-11	-1.54666e-12	2.31504e-11	3.08629e-11	5.40115e-11	5.24711e-11	6.63713e-11	1.08032e-10	1.4044e-10
0.549735	-3.39489e-11	-1.38873e-11	1.54272e-12	2.7774e-11	5.2466e-11	4.93794e-11	8.02451e-11	1.2963e-10	2.33035e-10	0.1365	-8.03326e-11	-9.1081e-11	-8.79763e-11	-9.57018e-11	-9.41858e-11	-9.72633e-11	-8.95923e-11	-9.41403e-11	-1.12614e-10	0.549735	-7.72e-12	1.13e-15	1.08e-11	1.39e-11	3.7e-11	6.02e-11	8.33e-11	1.13e-10	1.45e-10	0.1365	-1.56182e-09	-1.56024e-09	-1.5572e-09	-1.56942e-09	-1.53393e-09	-1.55556e-09	-1.52784e-09	-1.56186e-09	-1.55863e-09	0.549735	-1.38856e-11	-9.25914e-12	2.4692e-11	2.46937e-11	4.32159e-11	5.09317e-11	7.56164e-11	1.15742e-10	1.38899e-10
0.55074	-2.62369e-11	-9.26364e-12	-1.54497e-12	2.00689e-11	4.62968e-11	4.16715e-11	6.79112e-11	1.17299e-10	2.26866e-10	0.13675	-8.48715e-11	-9.56381e-11	-8.79763e-11	-9.41767e-11	-9.2597e-11	-1.00313e-10	-9.56654e-11	-9.1081e-11	-1.08103e-10	0.55074	-3.09e-12	-1.55e-12	1.54e-11	1.85e-11	3.55e-11	6.33e-11	8.03e-11	1.13e-10	1.36e-10	0.13675	-1.56336e-09	-1.56031e-09	-1.55105e-09	-1.55727e-09	-1.52792e-09	-1.54949e-09	-1.52634e-09	-1.56486e-09	-1.5496e-09	0.55074	-4.63717e-12	-1.54289e-11	2.46875e-11	2.16099e-11	4.32125e-11	5.8642e-11	7.25349e-11	1.12661e-10	1.46612e-10
0.551745	-2.16088e-11	-1.54317e-11	-9.2597e-12	2.93173e-11	3.55006e-11	4.16709e-11	7.40759e-11	1.31172e-10	2.29949e-10	0.137	-8.79399e-11	-9.25788e-11	-8.94922e-11	-9.86974e-11	-9.10537e-11	-1.03418e-10	-9.8761e-11	-9.26243e-11	-1.15646e-10	0.551745	-1.39e-11	-1.08e-11	5.63e-15	1.7e-11	2.93e-11	8.18e-11	8.33e-11	1.05e-10	1.47e-10	0.137	-1.56786e-09	-1.56789e-09	-1.55411e-09	-1.56178e-09	-1.53395e-09	-1.54951e-09	-1.53089e-09	-1.56336e-09	-1.56479e-09	0.551745	-1.54317e-11	-1.08069e-11	1.08092e-11	2.93184e-11	4.47552e-11	5.86482e-11	7.09939e-11	1.14202e-10	1.55866e-10
0.55275	-2.46892e-11	-1.852e-11	-1.69688e-11	2.46948e-11	3.85827e-11	4.7839e-11	7.5622e-11	1.26552e-10	2.31492e-10	0.13725	-8.6433e-11	-8.64603e-11	-8.80582e-11	-9.11902e-11	-8.96287e-11	-1.09464e-10	-1.00259e-10	-9.87247e-11	-1.06559e-10	0.55275	-2.01e-11	-1.08e-11	-5.63e-16	2.01e-11	2.78e-11	7.87e-11	8.64e-11	1.16e-10	1.5e-10	0.13725	-1.55273e-09	-1.56027e-09	-1.56178e-09	-1.56175e-09	-1.52791e-09	-1.55862e-09	-1.52791e-09	-1.56487e-09	-1.56335e-09	0.55275	-2.31459e-11	-1.69699e-11	1.38907e-11	2.62364e-11	4.62957e-11	6.78994e-11	7.71619e-11	1.14204e-10	1.497e-10
0.553755	-1.85217e-11	-2.31476e-11	-4.63154e-12	2.62375e-11	4.32102e-11	4.62991e-11	8.02502e-11	1.29634e-10	2.31494e-10	0.1375	-8.63693e-11	-8.64512e-11	-1.01729e-10	-1.06341e-10	-1.07884e-10	-9.73178e-11	-9.26425e-11	-9.71632e-11	-1.09573e-10	0.553755	-2.16e-11	-9.26e-12	-1.54e-12	1.7e-11	3.7e-11	7.56e-11	8.64e-11	1.27e-10	1.54e-10	0.1375	-1.56931e-09	-1.55407e-09	-1.56485e-09	-1.55262e-09	-1.53093e-09	-1.55112e-09	-1.53542e-09	-1.56333e-09	-1.56184e-09	0.553755	-2.16082e-11	-6.17708e-12	2.00554e-11	2.4692e-11	4.01265e-11	6.32752e-11	7.71653e-11	1.1729e-10	1.46615e-10
0.55476	-1.85228e-11	-2.31498e-11	3.08037e-12	3.24039e-11	4.32074e-11	4.62996e-11	8.33384e-11	1.28098e-10	2.36118e-10	0.13775	-7.72552e-11	-9.10719e-11	-9.4204e-11	-9.72542e-11	-1.01857e-10	-1.00259e-10	-9.26152e-11	-8.49807e-11	-1.12651e-10	0.55476	-2.32e-11	-1.39e-11	1.54e-12	2.47e-11	4.17e-11	7.41e-11	8.95e-11	1.22e-10	1.62e-10	0.13775	-1.55116e-09	-1.54493e-09	-1.56189e-09	-1.55554e-09	-1.53243e-09	-1.56325e-09	-1.5187e-09	-1.55878e-09	-1.56637e-09	0.55476	-2.62347e-11	-6.17313e-12	6.17933e-12	2.16065e-11	3.70371e-11	6.01937e-11	8.02507e-11	1.20375e-10	1.51241e-10
0.555765	-2.7778e-11	-2.46897e-11	-6.16525e-12	2.46914e-11	3.08713e-11	4.93873e-11	8.95088e-11	1.41974e-10	2.29953e-10	0.138	-8.33464e-11	-9.87247e-11	-9.72178e-11	-9.26152e-11	-9.56836e-11	-9.41858e-11	-9.56654e-11	-8.94922e-11	-1.14139e-10	0.555765	-3.09e-11	-1.7e-11	6.17e-12	2.78e-11	3.4e-11	7.87e-11	1.02e-10	1.25e-10	1.59e-10	0.138	-1.56017e-09	-1.55249e-09	-1.57404e-09	-1.54341e-09	-1.52637e-09	-1.55876e-09	-1.52014e-09	-1.56484e-09	-1.56032e-09	0.555765	-2.77785e-11	-6.17088e-12	9.25632e-12	2.00661e-11	2.93258e-11	7.25281e-11	8.33379e-11	1.20374e-10	1.54326e-10
0.55677	-3.395e-11	-1.852e-11	6.16919e-12	1.38957e-11	3.39494e-11	5.86397e-11	9.1052e-11	1.34273e-10	2.33043e-10	0.13825	-9.10082e-11	-9.87701e-11	-9.87338e-11	-9.11265e-11	-8.95559e-11	-9.56381e-11	-9.57109e-11	-9.10628e-11	-1.04998e-10	0.55677	-3.4e-11	-1.7e-11	1.54e-11	3.55e-11	5.09e-11	8.49e-11	1e-10	1.17e-10	1.62e-10	0.13825	-1.5541e-09	-1.55092e-09	-1.56796e-09	-1.55248e-09	-1.53096e-09	-1.56171e-09	-1.52316e-09	-1.56333e-09	-1.56483e-09	0.55677	-2.77791e-11	-5.63029e-16	3.08938e-12	2.77814e-11	3.08702e-11	6.79079e-11	8.79649e-11	1.14206e-10	1.49702e-10
0.557775	-3.39511e-11	-1.38941e-11	7.71642e-12	2.00604e-11	2.93218e-11	5.40217e-11	8.79694e-11	1.46608e-10	2.56173e-10	0.1385	-9.10355e-11	-9.87338e-11	-9.4204e-11	-1.01738e-10	-9.10446e-11	-8.95741e-11	-1.00259e-10	-9.4113e-11	-1.0498e-10	0.557775	-3.24e-11	-1.7e-11	1.85e-11	3.55e-11	5.71e-11	7.56e-11	9.26e-11	1.13e-10	1.62e-10	0.1385	-1.55098e-09	-1.5357e-09	-1.55883e-09	-1.55098e-09	-1.53865e-09	-1.54953e-09	-1.51561e-09	-1.55875e-09	-1.56029e-09	0.557775	-2.77808e-11	4.62816e-12	4.63323e-12	4.1663e-11	4.47473e-11	7.25315e-11	8.64267e-11	1.17285e-10	1.55871e-10
0.55878	-3.08696e-11	-2.16003e-11	9.25914e-12	2.00604e-11	2.31543e-11	6.78977e-11	9.10549e-11	1.48154e-10	2.45385e-10	0.13875	-8.79672e-11	-9.26425e-11	-1.00241e-10	-9.26516e-11	-9.10992e-11	-9.41585e-11	-9.56927e-11	-9.26334e-11	-1.11098e-10	0.55878	-3.7e-11	-1.39e-11	1.54e-11	4.78e-11	5.09e-11	6.95e-11	9.57e-11	1.13e-10	1.53e-10	0.13875	-1.54485e-09	-1.54323e-09	-1.56791e-09	-1.54645e-09	-1.54628e-09	-1.54946e-09	-1.52626e-09	-1.56023e-09	-1.56021e-09	0.55878	-3.24056e-11	4.62872e-12	1.54272e-11	4.01209e-11	3.70444e-11	6.94483e-11	9.25959e-11	1.08034e-10	1.60496e-10
0.559785	-3.85798e-11	-1.38941e-11	9.26252e-12	1.38896e-11	3.08612e-11	6.32769e-11	9.7224e-11	1.45068e-10	2.42298e-10	0.139	-8.48897e-11	-9.40948e-11	-9.41858e-11	-9.26152e-11	-9.87065e-11	-1.01766e-10	-9.26152e-11	-9.72087e-11	-1.14157e-10	0.559785	-4.17e-11	-7.72e-12	1.7e-11	4.78e-11	6.02e-11	6.94e-11	9.41e-11	1.11e-10	1.56e-10	0.139	-1.54186e-09	-1.54173e-09	-1.56642e-09	-1.55554e-09	-1.53872e-09	-1.54948e-09	-1.52939e-09	-1.55715e-09	-1.55263e-09	0.559785	-2.77825e-11	1.54554e-12	1.08058e-11	2.62426e-11	4.47547e-11	6.79067e-11	9.56813e-11	1.11117e-10	1.49701e-10
0.56079	-4.01271e-11	-1.85138e-11	1.69733e-11	7.71867e-12	2.62386e-11	6.48157e-11	9.5683e-11	1.38901e-10	2.46924e-10	0.13925	-8.33737e-11	-8.80309e-11	-9.57109e-11	-9.56836e-11	-9.57109e-11	-9.4204e-11	-9.26425e-11	-9.88247e-11	-1.09619e-10	0.56079	-2.78e-11	-4.63e-12	2.62e-11	4.48e-11	5.71e-11	6.33e-11	8.8e-11	1.13e-10	1.42e-10	0.13925	-1.55858e-09	-1.53868e-09	-1.56335e-09	-1.54954e-09	-1.54162e-09	-1.55404e-09	-1.53243e-09	-1.55106e-09	-1.56023e-09	0.56079	-3.24028e-11	4.62985e-12	1.38884e-11	3.08691e-11	5.09255e-11	7.25304e-11	9.2601e-11	1.15743e-10	1.45073e-10
0.561795	-4.62946e-11	-7.72092e-12	1.69722e-11	7.71811e-12	2.93218e-11	6.01903e-11	9.25976e-11	1.48148e-10	2.4693e-10	0.1395	-8.79308e-11	-9.25788e-11	-1.01829e-10	-9.87338e-11	-9.72269e-11	-9.72269e-11	-1.00277e-10	-1.09455e-10	-1.12587e-10	0.561795	-2.16e-11	4.62e-12	2.01e-11	4.63e-11	5.4e-11	6.33e-11	8.49e-11	1.05e-10	1.5e-10	0.1395	-1.55255e-09	-1.54017e-09	-1.56025e-09	-1.55705e-09	-1.52494e-09	-1.55101e-09	-1.52632e-09	-1.55564e-09	-1.56321e-09	0.561795	-2.00683e-11	7.71473e-12	1.38929e-11	4.47496e-11	4.93879e-11	6.63612e-11	1.00307e-10	1.12655e-10	1.52783e-10
0.5628	-4.16715e-11	-9.25801e-12	6.17651e-12	1.23423e-11	3.08657e-11	6.17302e-11	9.10532e-11	1.389e-10	2.59264e-10	0.13975	-8.64057e-11	-9.41312e-11	-1.03345e-10	-9.56654e-11	-9.87519e-11	-1.00232e-10	-1.01802e-10	-1.00395e-10	-1.03482e-10	0.5628	-2.78e-11	-1.54e-12	2.93e-11	4.17e-11	5.56e-11	5.71e-11	8.18e-11	9.41e-11	1.42e-10	0.13975	-1.54792e-09	-1.53712e-09	-1.5557e-09	-1.5449e-09	-1.53705e-09	-1.54946e-09	-1.52166e-09	-1.5617e-09	-1.54346e-09	0.5628	-2.31442e-11	6.17482e-12	2.31459e-11	4.32097e-11	5.55571e-11	6.0192e-11	9.10554e-11	9.72347e-11	1.54326e-10
0.563805	-4.47563e-11	-6.17313e-12	4.63154e-12	6.17651e-12	3.24078e-11	6.01886e-11	8.79677e-11	1.4198e-10	2.50015e-10	0.14	-8.18486e-11	-9.41312e-11	-9.57473e-11	-8.95468e-11	-9.71996e-11	-8.95923e-11	-9.42313e-11	-1.04898e-10	-1.08003e-10	0.563805	-3.24e-11	9.26e-12	2.78e-11	3.86e-11	5.71e-11	4.78e-11	7.72e-11	9.57e-11	1.37e-10	0.14	-1.54485e-09	-1.53562e-09	-1.56327e-09	-1.54484e-09	-1.53864e-09	-1.54794e-09	-1.51406e-09	-1.55107e-09	-1.55252e-09	0.563805	-1.23525e-11	9.25745e-12	2.31464e-11	3.54983e-11	5.86414e-11	6.48151e-11	8.64295e-11	1.03396e-10	1.48153e-10
0.56481	-5.0921e-11	-3.08938e-12	7.7136e-12	9.26252e-12	3.08679e-11	6.01858e-11	8.64228e-11	1.40436e-10	2.4847e-10	0.14025	-8.63602e-11	-9.26425e-11	-9.87883e-11	-8.95195e-11	-9.10901e-11	-9.25424e-11	-1.01775e-10	-1.01875e-10	-1.08075e-10	0.56481	-1.7e-11	1.23e-11	2.78e-11	3.4e-11	5.56e-11	5.4e-11	7.56e-11	9.57e-11	1.27e-10	0.14025	-1.54485e-09	-1.54322e-09	-1.55868e-09	-1.54635e-09	-1.53861e-09	-1.55099e-09	-1.52317e-09	-1.55255e-09	-1.55715e-09	0.56481	-1.85138e-11	6.17482e-12	1.54396e-11	3.54938e-11	5.24773e-11	6.17268e-11	9.72207e-11	9.87724e-11	1.35816e-10
0.565815	-3.70444e-11	-7.71529e-12	3.09163e-12	2.00571e-11	3.54944e-11	5.40166e-11	8.17946e-11	1.31183e-10	2.51548e-10	0.1405	-8.03235e-11	-9.87065e-11	-1.04861e-10	-9.1081e-11	-9.1081e-11	-8.64876e-11	-9.57655e-11	-1.01857e-10	-1.15683e-10	0.565815	-1.08e-11	1.08e-11	1.54e-11	3.7e-11	4.94e-11	5.4e-11	6.48e-11	1e-10	1.33e-10	0.1405	-1.54786e-09	-1.54027e-09	-1.54808e-09	-1.5448e-09	-1.53098e-09	-1.55254e-09	-1.52326e-09	-1.55558e-09	-1.55715e-09	0.565815	-9.2642e-12	7.71304e-12	2.62324e-11	3.08696e-11	6.17251e-11	4.63092e-11	9.1056e-11	1.00314e-10	1.41977e-10
0.56682	-3.85798e-11	-9.25857e-12	1.23356e-11	1.54362e-11	3.70388e-11	5.24711e-11	7.87046e-11	1.32721e-10	2.3613e-10	0.14075	-8.63784e-11	-9.41585e-11	-9.72723e-11	-9.71632e-11	-9.56472e-11	-9.10628e-11	-1.03327e-10	-1.01884e-10	-1.1266e-10	0.56682	-1.23e-11	3.09e-12	2.31e-11	2.78e-11	5.4e-11	5.25e-11	6.48e-11	1e-10	1.28e-10	0.14075	-1.54179e-09	-1.54937e-09	-1.56474e-09	-1.53874e-09	-1.53092e-09	-1.5541e-09	-1.52935e-09	-1.55096e-09	-1.5525e-09	0.56682	-1.23435e-11	0	2.77774e-11	3.70349e-11	5.40161e-11	6.01779e-11	9.1052e-11	1.034e-10	1.34272e-10
0.567825	-3.39505e-11	-7.72261e-12	-7.70741e-12	2.00632e-11	3.85832e-11	4.93834e-11	6.79129e-11	1.31181e-10	2.42296e-10	0.141	-8.4917e-11	-9.26425e-11	-9.72633e-11	-9.26425e-11	-9.42131e-11	-9.71723e-11	-9.88065e-11	-1.06468e-10	-1.09582e-10	0.567825	-9.26e-12	4.63e-12	1.7e-11	2.01e-11	5.09e-11	6.79e-11	6.48e-11	1.11e-10	1.39e-10	0.141	-1.54329e-09	-1.54333e-09	-1.5572e-09	-1.54777e-09	-1.52781e-09	-1.55868e-09	-1.52786e-09	-1.54035e-09	-1.54025e-09	0.567825	-7.72036e-12	-7.71248e-12	2.46942e-11	3.24112e-11	4.93856e-11	4.63058e-11	8.6425e-11	1.06487e-10	1.45066e-10
0.56883	-2.4697e-11	-2.31414e-11	-3.09051e-12	2.62324e-11	4.32114e-11	4.16732e-11	8.02468e-11	1.34265e-10	2.50007e-10	0.14125	-8.9474e-11	-9.87155e-11	-1.03373e-10	-9.56108e-11	-1.04798e-10	-9.41858e-11	-1.00313e-10	-1.07957e-10	-1.08066e-10	0.56883	-6.18e-12	7.71e-12	1.23e-11	1.54e-11	3.86e-11	6.64e-11	7.41e-11	9.88e-11	1.39e-10	0.14125	-1.54635e-09	-1.54484e-09	-1.55409e-09	-1.53266e-09	-1.51869e-09	-1.55714e-09	-1.52782e-09	-1.55556e-09	-1.53716e-09	0.56883	-1.38862e-11	-4.63492e-12	2.62353e-11	3.39489e-11	4.62979e-11	5.24699e-11	8.48778e-11	1.09573e-10	1.48156e-10
0.569835	-2.77774e-11	-1.69812e-11	-9.25745e-12	2.31526e-11	4.62974e-11	4.62946e-11	8.17923e-11	1.3581e-10	2.43838e-10	0.1415	-8.79763e-11	-9.56836e-11	-1.04889e-10	-8.64785e-11	-9.12084e-11	-9.87519e-11	-1.01848e-10	-9.7336e-11	-1.12641e-10	0.569835	-1.23e-11	4.63e-12	1.08e-11	2.01e-11	4.32e-11	6.02e-11	7.56e-11	1e-10	1.39e-10	0.1415	-1.54638e-09	-1.54788e-09	-1.55096e-09	-1.54776e-09	-1.52636e-09	-1.54956e-09	-1.52328e-09	-1.55863e-09	-1.54174e-09	0.569835	-1.08019e-11	-1.54255e-11	2.62341e-11	2.62364e-11	4.16703e-11	5.40149e-11	7.5622e-11	1.11118e-10	1.54325e-10
0.57084	-2.62336e-11	-2.46875e-11	-9.26083e-12	2.93196e-11	4.62968e-11	4.01265e-11	7.87046e-11	1.38896e-10	2.36126e-10	0.14175	-8.79672e-11	-9.26334e-11	-9.72723e-11	-8.64876e-11	-1.03254e-10	-1.00295e-10	-1.01811e-10	-1.0487e-10	-1.14157e-10	0.57084	-1.08e-11	-3.38e-15	1.7e-11	1.7e-11	4.01e-11	5.87e-11	7.87e-11	1.16e-10	1.5e-10	0.14175	-1.54792e-09	-1.54485e-09	-1.54179e-09	-1.53721e-09	-1.54309e-09	-1.55869e-09	-1.52929e-09	-1.54645e-09	-1.54634e-09	0.57084	-4.63435e-12	-6.17876e-12	2.16054e-11	2.00649e-11	4.16658e-11	5.55576e-11	6.9454e-11	1.17288e-10	1.51243e-10
0.571845	-1.85222e-11	-1.85228e-11	-1.23429e-11	2.77808e-11	4.16703e-11	3.70422e-11	6.79101e-11	1.43519e-10	2.39209e-10	0.142	-8.80036e-11	-9.5629e-11	-9.7236e-11	-9.7145e-11	-9.11447e-11	-9.87701e-11	-9.42495e-11	-1.00368e-10	-1.08112e-10	0.571845	-1.7e-11	-1.39e-11	6.17e-12	2.47e-11	2.78e-11	7.25e-11	8.64e-11	1.17e-10	1.53e-10	0.142	-1.55088e-09	-1.5448e-09	-1.54175e-09	-1.54322e-09	-1.52788e-09	-1.56334e-09	-1.51871e-09	-1.5479e-09	-1.54629e-09	0.571845	-1.08002e-11	-1.23451e-11	1.54323e-11	2.00627e-11	3.39562e-11	5.55644e-11	8.02434e-11	1.18833e-10	1.52783e-10
0.57285	-1.85222e-11	-2.1606e-11	-6.17595e-12	3.08612e-11	4.16687e-11	4.32125e-11	7.25343e-11	1.29641e-10	2.4383e-10	0.14225	-9.40675e-11	-8.95377e-11	-9.87155e-11	-9.41403e-11	-9.4113e-11	-9.72178e-11	-1.04852e-10	-1.04916e-10	-1.15664e-10	0.57285	-7.73e-12	-4.64e-12	-3.08e-12	1.85e-11	3.24e-11	7.87e-11	8.8e-11	1.22e-10	1.45e-10	0.14225	-1.53421e-09	-1.54022e-09	-1.54327e-09	-1.53873e-09	-1.51716e-09	-1.56632e-09	-1.52776e-09	-1.5479e-09	-1.53259e-09	0.57285	-9.26815e-12	-1.54289e-11	7.72148e-12	2.00649e-11	3.70371e-11	7.25242e-11	7.09944e-11	1.20376e-10	1.49704e-10
0.573855	-2.62308e-11	-2.46925e-11	-7.71529e-12	2.16122e-11	4.16647e-11	5.09278e-11	7.71659e-11	1.31177e-10	2.2379e-10	0.1425	-8.804e-11	-8.80036e-11	-9.11356e-11	-9.1081e-11	-9.26789e-11	-9.41767e-11	-1.00332e-10	-1.04916e-10	-1.0961e-10	0.573855	-2.62e-11	-1.08e-11	1.08e-11	2.16e-11	3.24e-11	7.25e-11	9.88e-11	1.16e-10	1.53e-10	0.1425	-1.54937e-09	-1.54019e-09	-1.54329e-09	-1.54627e-09	-1.52468e-09	-1.55116e-09	-1.52173e-09	-1.54637e-09	-1.53709e-09	0.573855	-3.08561e-11	-7.72092e-12	1.3885e-11	2.62336e-11	3.54938e-11	6.17387e-11	7.09961e-11	1.21914e-10	1.60496e-10
0.57486	-2.00638e-11	-2.77797e-11	-6.17144e-12	2.93179e-11	3.08719e-11	5.70964e-11	8.64222e-11	1.26554e-10	2.40745e-10	0.14275	-9.40402e-11	-9.26425e-11	-9.71541e-11	-9.2597e-11	-1.04816e-10	-9.71723e-11	-9.87883e-11	-1.00332e-10	-1.09582e-10	0.57486	-3.4e-11	-2.01e-11	7.88e-15	3.09e-11	3.24e-11	7.41e-11	8.95e-11	1.17e-10	1.54e-10	0.14275	-1.54944e-09	-1.53864e-09	-1.54485e-09	-1.53722e-09	-1.51859e-09	-1.56325e-09	-1.52473e-09	-1.54482e-09	-1.53864e-09	0.57486	-2.62364e-11	-1.23429e-11	7.71923e-12	2.62353e-11	2.93263e-11	7.09848e-11	8.4875e-11	1.09582e-10	1.57418e-10
0.575865	-1.69829e-11	-3.24056e-11	-5.63029e-16	2.46954e-11	3.70371e-11	4.93913e-11	9.10532e-11	1.34266e-10	2.39208e-10	0.143	-8.34738e-11	-1.04816e-10	-9.10537e-11	-9.40766e-11	-9.57473e-11	-9.11356e-11	-1.00232e-10	-9.87701e-11	-1.11144e-10	0.575865	-3.7e-11	-1.85e-11	1.08e-11	3.7e-11	4.01e-11	8.18e-11	9.88e-11	1.22e-10	1.59e-10	0.143	-1.54635e-09	-1.53557e-09	-1.54934e-09	-1.54621e-09	-1.51249e-09	-1.55871e-09	-1.5217e-09	-1.5417e-09	-1.53866e-09	0.575865	-2.3156e-11	-7.71473e-12	9.25689e-12	2.46937e-11	3.39556e-11	6.32774e-11	8.33373e-11	1.21915e-10	1.62042e-10
0.57687	-3.24039e-11	-2.77774e-11	4.63041e-12	2.7774e-11	3.85787e-11	5.86425e-11	9.41403e-11	1.41978e-10	2.36124e-10	0.14325	-9.55744e-11	-9.572e-11	-8.50171e-11	-8.5008e-11	-9.72451e-11	-9.87428e-11	-8.80763e-11	-9.72269e-11	-1.17226e-10	0.57687	-4.32e-11	-1.85e-11	-1.53e-12	3.4e-11	4.32e-11	7.56e-11	8.49e-11	1.2e-10	1.53e-10	0.14325	-1.54028e-09	-1.53251e-09	-1.53413e-09	-1.52801e-09	-1.5185e-09	-1.55256e-09	-1.5232e-09	-1.53254e-09	-1.54015e-09	0.57687	-3.85748e-11	1.54216e-12	3.09107e-12	2.62375e-11	4.78328e-11	6.32791e-11	8.17951e-11	1.21921e-10	1.58959e-10
0.577875	-3.39534e-11	-1.85233e-11	1.08007e-11	1.69801e-11	3.08662e-11	6.17297e-11	9.72263e-11	1.38901e-10	2.37666e-10	0.1435	-8.95741e-11	-9.25788e-11	-1.01748e-10	-9.71268e-11	-1.01811e-10	-1.01866e-10	-9.40584e-11	-9.572e-11	-1.12641e-10	0.577875	-4.32e-11	-1.39e-11	1.39e-11	4.32e-11	5.56e-11	8.18e-11	1e-10	1.19e-10	1.56e-10	0.1435	-1.54788e-09	-1.534e-09	-1.53702e-09	-1.53546e-09	-1.50947e-09	-1.54951e-09	-1.52171e-09	-1.53246e-09	-1.53405e-09	0.577875	-3.39534e-11	7.71248e-12	9.25801e-12	3.24067e-11	3.70444e-11	7.56147e-11	8.33384e-11	1.26541e-10	1.57414e-10
0.57888	-3.85798e-11	-2.00627e-11	1.08052e-11	1.69789e-11	2.46948e-11	6.01926e-11	9.87668e-11	1.51237e-10	2.40752e-10	0.14375	-9.41039e-11	-8.6524e-11	-1.00304e-10	-9.26516e-11	-9.88338e-11	-1.06414e-10	-8.6524e-11	-1.00241e-10	-1.05007e-10	0.57888	-3.09e-11	-2.78e-11	2.16e-11	4.48e-11	5.09e-11	7.56e-11	8.95e-11	1.17e-10	1.56e-10	0.14375	-1.54943e-09	-1.53094e-09	-1.52483e-09	-1.52482e-09	-1.52308e-09	-1.55557e-09	-1.52627e-09	-1.52941e-09	-1.53253e-09	0.57888	-3.24061e-11	3.08769e-12	1.07979e-11	3.24101e-11	4.16703e-11	7.09927e-11	8.79666e-11	1.09579e-10	1.52787e-10
0.579885	-3.70388e-11	-2.16032e-11	1.69716e-11	2.46852e-11	2.46937e-11	7.09837e-11	9.10594e-11	1.5124e-10	2.43845e-10	0.144	-9.25788e-11	-9.72178e-11	-9.72269e-11	-9.72178e-11	-1.06396e-10	-9.87974e-11	-9.5629e-11	-9.26698e-11	-1.08039e-10	0.579885	-3.86e-11	-4.64e-12	2.31e-11	3.55e-11	4.63e-11	7.1e-11	9.11e-11	1.11e-10	1.47e-10	0.144	-1.54643e-09	-1.52788e-09	-1.52324e-09	-1.52323e-09	-1.5141e-09	-1.55103e-09	-1.5248e-09	-1.52941e-09	-1.53863e-09	0.579885	-2.31509e-11	1.54497e-12	-1.53259e-12	3.54955e-11	5.0925e-11	7.09905e-11	9.10543e-11	1.09574e-10	1.52783e-10
0.58089	-3.54961e-11	-1.54345e-11	1.08064e-11	1.23508e-11	2.77785e-11	6.17353e-11	9.87656e-11	1.45071e-10	2.6389e-10	0.14425	-8.80218e-11	-1.06386e-10	-9.4204e-11	-1.00286e-10	-9.88338e-11	-9.57564e-11	-9.57018e-11	-9.71905e-11	-1.12605e-10	0.58089	-1.85e-11	3.08e-12	2.01e-11	4.17e-11	6.02e-11	5.4e-11	8.64e-11	1.13e-10	1.5e-10	0.14425	-1.55395e-09	-1.52932e-09	-1.52476e-09	-1.5233e-09	-1.52769e-09	-1.55096e-09	-1.52937e-09	-1.53244e-09	-1.54019e-09	0.58089	-1.85239e-11	4.62816e-12	1.54295e-11	3.85821e-11	5.09312e-11	6.945e-11	9.56813e-11	1.11115e-10	1.48154e-10
0.581895	-3.54966e-11	-1.38884e-11	1.38873e-11	1.23468e-11	2.93184e-11	6.32741e-11	9.41459e-11	1.46611e-10	2.53101e-10	0.1445	-9.25515e-11	-9.88156e-11	-1.01793e-10	-9.87428e-11	-1.01811e-10	-1.04898e-10	-9.8761e-11	-9.57018e-11	-1.08066e-10	0.581895	-2.78e-11	4.63e-12	2.31e-11	4.17e-11	6.79e-11	6.33e-11	8.33e-11	1.11e-10	1.3e-10	0.1445	-1.53877e-09	-1.51869e-09	-1.5264e-09	-1.537e-09	-1.51407e-09	-1.54488e-09	-1.5294e-09	-1.52941e-09	-1.54015e-09	0.581895	-2.62336e-11	3.08826e-12	2.31459e-11	4.16653e-11	5.86397e-11	7.40725e-11	9.41409e-11	1.09572e-10	1.38899e-10
0.5829	-3.85815e-11	-9.26083e-12	1.08052e-11	1.38884e-11	2.00694e-11	6.32724e-11	1.04937e-10	1.4661e-10	2.48472e-10	0.14475	-8.95377e-11	-9.86974e-11	-9.87974e-11	-9.25879e-11	-9.72451e-11	-1.06405e-10	-1.00268e-10	-9.72178e-11	-1.09555e-10	0.5829	-2.62e-11	9.26e-12	2.16e-11	4.17e-11	6.02e-11	7.25e-11	7.87e-11	9.72e-11	1.39e-10	0.14475	-1.54321e-09	-1.52475e-09	-1.54307e-09	-1.53248e-09	-1.51854e-09	-1.54792e-09	-1.53087e-09	-1.52934e-09	-1.53253e-09	0.5829	-2.77752e-11	6.17201e-12	2.16071e-11	3.54983e-11	5.24773e-11	6.48207e-11	9.41403e-11	1.04943e-10	1.40438e-10
0.583905	-4.01265e-11	-7.71642e-12	1.3885e-11	1.23463e-11	2.93184e-11	5.71037e-11	9.87685e-11	1.4044e-10	2.53091e-10	0.145	-9.10264e-11	-8.65604e-11	-1.0025e-10	-8.50171e-11	-9.56927e-11	-9.42222e-11	-9.42313e-11	-9.72087e-11	-1.08021e-10	0.583905	-1.7e-11	1.39e-11	3.24e-11	3.86e-11	5.86e-11	5.25e-11	8.18e-11	1.05e-10	1.37e-10	0.145	-1.53563e-09	-1.52782e-09	-1.52496e-09	-1.5279e-09	-1.51402e-09	-1.55245e-09	-1.52167e-09	-1.52016e-09	-1.53244e-09	0.583905	-1.85233e-11	6.17482e-12	2.31481e-11	3.70405e-11	6.17257e-11	6.32729e-11	9.41386e-11	9.87741e-11	1.38896e-10
0.58491	-4.47518e-11	-6.17032e-12	4.63661e-12	1.0803e-11	2.7783e-11	5.71009e-11	8.79711e-11	1.38896e-10	2.37675e-10	0.14525	-8.80127e-11	-9.71905e-11	-9.11447e-11	-1.00259e-10	-9.56927e-11	-9.57018e-11	-1.03336e-10	-9.41858e-11	-1.04916e-10	0.58491	-1.7e-11	3.09e-12	2.78e-11	3.86e-11	6.64e-11	4.94e-11	6.79e-11	9.88e-11	1.33e-10	0.14525	-1.53864e-09	-1.52626e-09	-1.5385e-09	-1.53087e-09	-1.51854e-09	-1.54175e-09	-1.51101e-09	-1.51554e-09	-1.52642e-09	0.58491	-2.00604e-11	1.07979e-11	2.16088e-11	4.32069e-11	5.5561e-11	5.71015e-11	8.95093e-11	1.03396e-10	1.37356e-10
0.585915	-4.01214e-11	3.08319e-12	1.38839e-11	9.26252e-12	3.70354e-11	5.55582e-11	8.79649e-11	1.37351e-10	2.48461e-10	0.1455	-9.25606e-11	-1.01802e-10	-9.71814e-11	-1.06386e-10	-9.72723e-11	-1.00313e-10	-1.01848e-10	-9.86792e-11	-9.7336e-11	0.585915	-1.08e-11	5.07e-15	2.78e-11	2.93e-11	5.4e-11	5.86e-11	6.64e-11	1e-10	1.3e-10	0.1455	-1.53871e-09	-1.51717e-09	-1.52636e-09	-1.52334e-09	-1.51402e-09	-1.53259e-09	-1.52308e-09	-1.51703e-09	-1.53853e-09	0.585915	-1.54323e-11	1.5461e-12	2.77752e-11	3.55e-11	5.71032e-11	5.09312e-11	8.17985e-11	9.72331e-11	1.46608e-10
0.58692	-2.46993e-11	3.08094e-12	7.71698e-12	1.54345e-11	3.70427e-11	5.40127e-11	8.17946e-11	1.31181e-10	2.37668e-10	0.14575	-9.10537e-11	-9.72815e-11	-9.57109e-11	-9.572e-11	-1.06377e-10	-1.04925e-10	-9.88065e-11	-8.81036e-11	-1.0793e-10	0.58692	-7.72e-12	1.08e-11	3.55e-11	2.32e-11	4.48e-11	5.4e-11	7.25e-11	1e-10	1.25e-10	0.14575	-1.54779e-09	-1.52775e-09	-1.52324e-09	-1.53549e-09	-1.52012e-09	-1.54165e-09	-1.51095e-09	-1.5155e-09	-1.52942e-09	0.58692	-9.26477e-12	-5.63029e-16	2.31532e-11	4.01175e-11	6.32701e-11	5.24688e-11	8.64211e-11	1.08025e-10	1.45068e-10
0.587925	-2.77757e-11	-1.23395e-11	3.08657e-12	2.62313e-11	4.7835e-11	4.62985e-11	7.71625e-11	1.29639e-10	2.34581e-10	0.146	-8.95923e-11	-1.01802e-10	-9.87428e-11	-9.1081e-11	-9.72815e-11	-1.06432e-10	-1.0182e-10	-1.00222e-10	-1.01875e-10	0.587925	-1.39e-11	1.55e-12	1.7e-11	2.32e-11	4.78e-11	5.71e-11	7.56e-11	1.08e-10	1.34e-10	0.146	-1.5357e-09	-1.52176e-09	-1.52323e-09	-1.53395e-09	-1.52318e-09	-1.53557e-09	-1.51096e-09	-1.51245e-09	-1.5248e-09	0.587925	-1.69716e-11	-3.086e-12	2.93168e-11	2.31594e-11	5.71009e-11	4.63019e-11	8.33345e-11	1.06487e-10	1.41983e-10
0.58893	-2.16093e-11	-9.26252e-12	-1.54441e-12	2.46925e-11	4.01304e-11	3.85827e-11	6.79107e-11	1.35802e-10	2.36121e-10	0.14625	-1.0172e-10	-9.72451e-11	-9.72542e-11	-9.10719e-11	-9.72451e-11	-9.88338e-11	-9.87519e-11	-9.72633e-11	-9.87883e-11	0.58893	-1.23e-11	-2.25e-15	2.62e-11	2.62e-11	4.17e-11	6.79e-11	7.72e-11	1.13e-10	1.37e-10	0.14625	-1.54627e-09	-1.52937e-09	-1.52481e-09	-1.52023e-09	-1.52017e-09	-1.52947e-09	-1.52459e-09	-1.51398e-09	-1.52628e-09	0.58893	-1.23519e-11	-4.62985e-12	2.00661e-11	3.39466e-11	4.93845e-11	4.93856e-11	7.25383e-11	1.06489e-10	1.4044e-10
0.589935	-2.46937e-11	-1.38896e-11	-9.25801e-12	2.31493e-11	4.62946e-11	3.24118e-11	7.56192e-11	1.21925e-10	2.33042e-10	0.1465	-9.11265e-11	-9.56654e-11	-1.00286e-10	-9.41403e-11	-1.0025e-10	-1.01811e-10	-9.26607e-11	-1.00304e-10	-9.87519e-11	0.589935	-1.23e-11	-7.71e-12	1.54e-11	1.24e-11	3.86e-11	6.17e-11	7.87e-11	1.13e-10	1.28e-10	0.1465	-1.5402e-09	-1.53243e-09	-1.53397e-09	-1.52164e-09	-1.52326e-09	-1.53545e-09	-1.50945e-09	-1.51855e-09	-1.52329e-09	0.589935	-2.31369e-11	-6.1737e-12	2.00621e-11	2.93235e-11	4.01321e-11	5.40144e-11	7.2536e-11	1.12658e-10	1.41984e-10
0.59094	-3.08595e-11	-1.85177e-11	-1.23435e-11	2.16077e-11	4.16726e-11	3.39539e-11	7.87052e-11	1.23463e-10	2.46915e-10	0.14675	-9.26334e-11	-9.11447e-11	-9.8761e-11	-9.72269e-11	-9.26698e-11	-9.7236e-11	-9.71996e-11	-1.01811e-10	-9.572e-11	0.59094	-9.26e-12	-4.63e-12	6.18e-12	1.85e-11	3.09e-11	6.64e-11	8.03e-11	1.16e-10	1.47e-10	0.14675	-1.53411e-09	-1.5279e-09	-1.53396e-09	-1.51718e-09	-1.53235e-09	-1.52179e-09	-1.51396e-09	-1.51553e-09	-1.53236e-09	0.59094	-1.63278e-14	-9.26083e-12	1.85188e-11	2.77769e-11	4.93778e-11	5.71021e-11	7.71608e-11	1.14202e-10	1.48156e-10
0.591945	-2.00661e-11	-1.85239e-11	-7.71642e-12	2.4692e-11	4.7835e-11	4.01248e-11	7.5622e-11	1.2655e-10	2.3304e-10	0.147	-1.00241e-10	-1.01802e-10	-9.56927e-11	-1.00277e-10	-9.72178e-11	-9.41494e-11	-9.72269e-11	-9.57291e-11	-9.87701e-11	0.591945	-2.01e-11	-6.17e-12	7.71e-12	2.31e-11	2.78e-11	7.56e-11	8.95e-11	1.22e-10	1.4e-10	0.147	-1.54162e-09	-1.5309e-09	-1.52334e-09	-1.53544e-09	-1.52025e-09	-1.52631e-09	-1.51854e-09	-1.51708e-09	-1.52173e-09	0.591945	-2.15936e-11	-1.54295e-11	1.54357e-11	2.00661e-11	3.85855e-11	6.17308e-11	7.25354e-11	1.14207e-10	1.55869e-10
0.59295	-1.85228e-11	-3.08578e-11	-3.08769e-12	2.62375e-11	3.55e-11	4.47535e-11	7.56226e-11	1.3272e-10	2.29954e-10	0.14725	-9.56654e-11	-1.03355e-10	-9.41585e-11	-9.72723e-11	-1.00332e-10	-9.26425e-11	-9.71268e-11	-9.72087e-11	-1.01875e-10	0.59295	-1.54e-11	-1.08e-11	4.63e-12	2.93e-11	3.55e-11	7.87e-11	8.49e-11	1.3e-10	1.45e-10	0.14725	-1.52949e-09	-1.52784e-09	-1.5324e-09	-1.53254e-09	-1.5278e-09	-1.53096e-09	-1.51401e-09	-1.52471e-09	-1.52022e-09	0.59295	-9.26758e-12	-1.23474e-11	2.00559e-11	2.16071e-11	3.70388e-11	6.48162e-11	7.0995e-11	1.26544e-10	1.55871e-10
0.593955	-2.62302e-11	-2.16077e-11	-1.54216e-12	3.24067e-11	3.54978e-11	4.4758e-11	8.02502e-11	1.31181e-10	2.40748e-10	0.1475	-8.8049e-11	-9.72542e-11	-9.56745e-11	-1.01875e-10	-1.06468e-10	-9.87428e-11	-8.04327e-11	-9.56836e-11	-1.07921e-10	0.593955	-2.78e-11	-1.7e-11	-1.54e-12	2.93e-11	3.55e-11	7.41e-11	8.95e-11	1.16e-10	1.48e-10	0.1475	-1.53397e-09	-1.52328e-09	-1.52794e-09	-1.53859e-09	-1.52637e-09	-1.53865e-09	-1.51697e-09	-1.52322e-09	-1.53233e-09	0.593955	-1.85155e-11	-1.23446e-11	6.17708e-12	2.62336e-11	3.54961e-11	6.32774e-11	8.02479e-11	1.23462e-10	1.54331e-10
0.59496	-1.85239e-11	-1.69812e-11	3.08319e-12	3.24067e-11	4.16636e-11	5.24728e-11	8.33373e-11	1.34268e-10	2.39209e-10	0.14775	-9.41312e-11	-9.57291e-11	-9.57018e-11	-1.09473e-10	-1.095e-10	-1.00277e-10	-9.40311e-11	-9.42222e-11	-9.58383e-11	0.59496	-2.32e-11	-2.31e-11	4.63e-12	3.09e-11	4.01e-11	8.33e-11	8.95e-11	1.22e-10	1.53e-10	0.14775	-1.52944e-09	-1.52781e-09	-1.53852e-09	-1.53404e-09	-1.53549e-09	-1.54619e-09	-1.50631e-09	-1.52168e-09	-1.51866e-09	0.59496	-1.69812e-11	-7.71529e-12	3.08826e-12	2.46914e-11	3.54978e-11	6.94444e-11	8.17929e-11	1.18835e-10	1.58955e-10
0.595965	-2.31493e-11	-2.62319e-11	-1.53934e-12	2.62369e-11	3.39517e-11	6.32667e-11	8.64205e-11	1.43524e-10	2.39207e-10	0.148	-9.8661e-11	-1.01829e-10	-9.87338e-11	-1.00359e-10	-1.00395e-10	-9.57473e-11	-8.95468e-11	-1.06359e-10	-1.094e-10	0.595965	-3.24e-11	-1.7e-11	1.13e-15	3.24e-11	3.7e-11	7.87e-11	9.57e-11	1.25e-10	1.59e-10	0.148	-1.53244e-09	-1.52634e-09	-1.52643e-09	-1.53249e-09	-1.5309e-09	-1.52344e-09	-1.50626e-09	-1.52013e-09	-1.51712e-09	0.595965	-2.93173e-11	-2.81514e-15	4.62816e-12	2.00661e-11	4.16642e-11	6.6364e-11	8.02541e-11	1.20374e-10	1.54331e-10
0.59697	-2.77797e-11	-2.46942e-11	4.62422e-12	2.31515e-11	2.46965e-11	5.24773e-11	8.02575e-11	1.49695e-10	2.34582e-10	0.14825	-8.49716e-11	-1.03391e-10	-9.57382e-11	-9.87883e-11	-1.04916e-10	-1.01802e-10	-9.10719e-11	-9.72906e-11	-9.42768e-11	0.59697	-3.4e-11	-1.85e-11	-1.54e-12	4.78e-11	3.55e-11	7.41e-11	9.57e-11	1.25e-10	1.47e-10	0.14825	-1.5294e-09	-1.5309e-09	-1.53549e-09	-1.53249e-09	-1.52023e-09	-1.53699e-09	-1.50926e-09	-1.51856e-09	-1.52778e-09	0.59697	-2.77825e-11	3.9412e-15	1.54779e-12	2.4692e-11	3.54983e-11	7.09894e-11	8.79627e-11	1.17292e-10	1.57413e-10
0.597975	-3.39489e-11	-2.7774e-11	-4.61746e-12	2.62291e-11	2.62358e-11	5.71009e-11	9.25919e-11	1.46612e-10	2.39212e-10	0.1485	-8.64148e-11	-1.03418e-10	-1.01775e-10	-1.00295e-10	-1.0498e-10	-9.87883e-11	-9.56199e-11	-9.86974e-11	-1.01793e-10	0.597975	-4.01e-11	-2.31e-11	1.08e-11	3.86e-11	5.25e-11	7.72e-11	8.33e-11	1.19e-10	1.48e-10	0.1485	-1.52792e-09	-1.52946e-09	-1.53248e-09	-1.53401e-09	-1.52624e-09	-1.53099e-09	-1.50012e-09	-1.51244e-09	-1.52631e-09	0.597975	-3.54916e-11	1.07968e-11	1.0799e-11	2.77819e-11	3.70427e-11	7.09899e-11	8.33407e-11	1.21916e-10	1.54329e-10
0.59898	-3.08707e-11	-1.69789e-11	2.00514e-11	1.08109e-11	2.77785e-11	6.01864e-11	9.10565e-11	1.45071e-10	2.53092e-10	0.14875	-8.64512e-11	-1.06405e-10	-9.42131e-11	-9.87701e-11	-1.11053e-10	-9.87701e-11	-8.95559e-11	-8.81036e-11	-9.87701e-11	0.59898	-4.01e-11	-3.09e-12	1.85e-11	3.86e-11	6.02e-11	7.72e-11	8.49e-11	1.17e-10	1.45e-10	0.14875	-1.53854e-09	-1.53851e-09	-1.52948e-09	-1.534e-09	-1.52168e-09	-1.53399e-09	-1.49853e-09	-1.50937e-09	-1.5248e-09	0.59898	-3.24084e-11	4.63041e-12	9.26026e-12	3.85798e-11	4.93806e-11	6.79073e-11	8.79655e-11	1.17289e-10	1.52787e-10
0.599985	-4.16658e-11	-1.38901e-11	1.38918e-11	1.69722e-11	2.7778e-11	5.86453e-11	9.72252e-11	1.49699e-10	2.48471e-10	0.149	-9.10355e-11	-9.57473e-11	-9.87519e-11	-9.72451e-11	-1.06496e-10	-9.87792e-11	-9.10264e-11	-1.00213e-10	-9.572e-11	0.599985	-3.4e-11	-4.63e-12	1.85e-11	4.32e-11	5.09e-11	6.48e-11	9.72e-11	1.05e-10	1.45e-10	0.149	-1.52942e-09	-1.52332e-09	-1.5402e-09	-1.52944e-09	-1.51707e-09	-1.53091e-09	-1.49702e-09	-1.51235e-09	-1.52943e-09	0.599985	-2.77808e-11	3.9412e-15	9.26364e-12	4.3208e-11	4.93845e-11	7.25321e-11	8.79688e-11	1.11118e-10	1.57408e-10
0.60099	-4.47518e-11	-1.23451e-11	1.38884e-11	1.23485e-11	2.46942e-11	5.86442e-11	9.87685e-11	1.55866e-10	2.50012e-10	0.14925	-9.26152e-11	-9.56745e-11	-1.00304e-10	-9.8761e-11	-1.03445e-10	-1.00304e-10	-8.79581e-11	-9.57018e-11	-9.88156e-11	0.60099	-3.55e-11	-3.08e-12	2.62e-11	4.32e-11	6.48e-11	6.64e-11	9.11e-11	1.05e-10	1.39e-10	0.14925	-1.52479e-09	-1.52482e-09	-1.55087e-09	-1.53251e-09	-1.51561e-09	-1.52328e-09	-1.50158e-09	-1.50324e-09	-1.54006e-09	0.60099	-2.77757e-11	6.17201e-12	2.00548e-11	3.70433e-11	4.78452e-11	7.09877e-11	9.25976e-11	1.08028e-10	1.41988e-10
0.601995	-3.85838e-11	-7.71642e-12	1.08035e-11	1.38924e-11	2.62347e-11	5.71043e-11	9.56825e-11	1.46618e-10	2.51557e-10	0.1495	-9.71814e-11	-9.41585e-11	-1.00277e-10	-9.88156e-11	-1.07966e-10	-1.00323e-10	-8.3401e-11	-9.42404e-11	-1.09446e-10	0.601995	-2.47e-11	4.63e-12	3.09e-11	4.17e-11	6.17e-11	6.02e-11	8.49e-11	9.57e-11	1.33e-10	0.1495	-1.52481e-09	-1.53546e-09	-1.5402e-09	-1.54011e-09	-1.53228e-09	-1.52636e-09	-1.50009e-09	-1.5078e-09	-1.52791e-09	0.601995	-1.85239e-11	9.26026e-12	9.26589e-12	4.32086e-11	5.55537e-11	6.01931e-11	9.87679e-11	9.87741e-11	1.41981e-10
0.603	-3.70427e-11	-3.08826e-12	9.26308e-12	2.31425e-11	2.46959e-11	6.32724e-11	8.9511e-11	1.54323e-10	2.57722e-10	0.14975	-9.41767e-11	-9.56654e-11	-9.41767e-11	-1.06405e-10	-1.01929e-10	-1.01866e-10	-8.94649e-11	-1.09409e-10	-9.88156e-11	0.603	-3.24e-11	4.63e-12	2.62e-11	4.17e-11	6.64e-11	5.56e-11	7.25e-11	9.72e-11	1.42e-10	0.14975	-1.53237e-09	-1.52792e-09	-1.52947e-09	-1.5325e-09	-1.5157e-09	-1.53854e-09	-1.50157e-09	-1.51391e-09	-1.52482e-09	0.603	-2.16032e-11	1.38856e-11	1.54351e-11	4.01271e-11	5.09312e-11	6.32729e-11	9.87685e-11	1.00316e-10	1.38896e-10
0.604005	-4.62951e-11	-3.08769e-12	1.69722e-11	1.38924e-11	3.2405e-11	6.32741e-11	8.48789e-11	1.46615e-10	2.4693e-10	0.15	-9.72087e-11	-9.41494e-11	-9.41585e-11	-1.00423e-10	-1.08003e-10	-1.04843e-10	-8.79672e-11	-9.73178e-11	-9.56745e-11	0.604005	-2.01e-11	7.72e-12	3.55e-11	3.09e-11	5.56e-11	4.94e-11	6.64e-11	1e-10	1.34e-10	0.15	-1.52175e-09	-1.53242e-09	-1.5309e-09	-1.5279e-09	-1.53082e-09	-1.53092e-09	-1.49552e-09	-1.51091e-09	-1.53099e-09	0.604005	-1.69756e-11	7.7198e-12	2.77712e-11	4.16698e-11	5.40138e-11	6.17308e-11	9.41403e-11	1.08022e-10	1.37353e-10
0.60501	-4.62951e-11	-6.17088e-12	1.38901e-11	1.2344e-11	2.9332e-11	6.17291e-11	7.5626e-11	1.46612e-10	2.4847e-10	0.15025	-9.71996e-11	-9.41403e-11	-9.71905e-11	-1.12523e-10	-1.09519e-10	-9.11447e-11	-8.64239e-11	-1.00241e-10	-9.1172e-11	0.60501	-3.1e-12	1.7e-11	2.47e-11	4.01e-11	5.86e-11	4.63e-11	7.25e-11	9.72e-11	1.3e-10	0.15025	-1.5232e-09	-1.52634e-09	-1.52638e-09	-1.53091e-09	-1.52631e-09	-1.52019e-09	-1.5031e-09	-1.51392e-09	-1.5462e-09	0.60501	-1.08075e-11	1.08013e-11	1.8525e-11	4.62934e-11	5.40149e-11	5.86437e-11	8.95099e-11	9.41493e-11	1.37352e-10
0.606015	-3.70394e-11	-3.08657e-12	1.2344e-11	4.63942e-12	5.24587e-11	5.40194e-11	8.02507e-11	1.46609e-10	2.53093e-10	0.1505	-9.26698e-11	-9.41221e-11	-9.41312e-11	-1.01948e-10	-1.01875e-10	-9.26334e-11	-8.49261e-11	-9.11447e-11	-1.06386e-10	0.606015	-1.39e-11	1.54e-11	2.93e-11	2.16e-11	5.25e-11	5.86e-11	7.25e-11	9.11e-11	1.28e-10	0.1505	-1.5216e-09	-1.52632e-09	-1.53401e-09	-1.52942e-09	-1.52171e-09	-1.51859e-09	-1.50163e-09	-1.51087e-09	-1.5326e-09	0.606015	-1.69716e-11	9.25463e-12	2.4688e-11	3.70422e-11	5.40166e-11	5.24728e-11	8.33401e-11	1.04939e-10	1.35808e-10
0.60702	-2.93286e-11	-3.9412e-15	4.63379e-12	2.31414e-11	4.0131e-11	5.86375e-11	8.48722e-11	1.38898e-10	2.42297e-10	0.15075	-1.00259e-10	-9.10537e-11	-8.96014e-11	-1.06459e-10	-9.72996e-11	-1.00232e-10	-9.10264e-11	-9.71723e-11	-1.04961e-10	0.60702	-3.09e-12	1.39e-11	3.86e-11	2.16e-11	5.25e-11	5.4e-11	7.1e-11	1e-10	1.3e-10	0.15075	-1.5079e-09	-1.52783e-09	-1.54007e-09	-1.53249e-09	-1.52319e-09	-1.51711e-09	-1.50314e-09	-1.50627e-09	-1.5386e-09	0.60702	-1.08035e-11	-6.16638e-12	1.85228e-11	3.70337e-11	5.86408e-11	4.9389e-11	8.48778e-11	1.03402e-10	1.32725e-10
0.608025	-3.85776e-11	-7.71417e-12	7.70966e-12	2.00655e-11	4.32125e-11	4.32176e-11	6.63713e-11	1.38895e-10	2.36127e-10	0.151	-9.87883e-11	-8.79763e-11	-1.00232e-10	-1.06532e-10	-1.04852e-10	-9.42404e-11	-9.25606e-11	-9.41494e-11	-1.06414e-10	0.608025	4.62e-12	6.17e-12	2.01e-11	3.24e-11	4.01e-11	5.25e-11	6.64e-11	1.1e-10	1.27e-10	0.151	-1.51237e-09	-1.5264e-09	-1.5249e-09	-1.53709e-09	-1.52015e-09	-1.52623e-09	-1.50159e-09	-1.50624e-09	-1.53561e-09	0.608025	-6.17482e-12	-3.086e-12	2.16032e-11	2.3156e-11	5.24716e-11	5.70992e-11	7.87069e-11	1.08026e-10	1.37354e-10
0.60903	-3.54933e-11	-9.26252e-12	-7.7091e-12	2.46925e-11	4.78384e-11	4.32108e-11	7.56186e-11	1.37352e-10	2.43834e-10	0.15125	-1.00332e-10	-8.64876e-11	-9.72178e-11	-1.14085e-10	-9.72723e-11	-1.04916e-10	-8.79308e-11	-9.26334e-11	-9.5811e-11	0.60903	-1.39e-11	-3.08e-12	1.7e-11	2.78e-11	3.86e-11	6.17e-11	7.25e-11	1.1e-10	1.36e-10	0.15125	-1.5094e-09	-1.54002e-09	-1.53238e-09	-1.53855e-09	-1.52016e-09	-1.5217e-09	-1.49553e-09	-1.50626e-09	-1.54015e-09	0.60903	-6.17539e-12	1.53315e-12	1.69761e-11	2.77769e-11	4.62974e-11	5.86425e-11	7.09939e-11	1.0186e-10	1.46606e-10
0.610035	-2.62431e-11	-1.85143e-11	-3.08882e-12	2.93168e-11	4.32148e-11	4.01288e-11	7.87052e-11	1.34264e-10	2.37667e-10	0.1515	-1.04898e-10	-9.56017e-11	-9.26698e-11	-1.01966e-10	-9.72269e-11	-1.11016e-10	-7.73189e-11	-9.71905e-11	-1.06459e-10	0.610035	-7.72e-12	-1.54e-12	1.39e-11	2.16e-11	4.17e-11	6.64e-11	7.56e-11	1.11e-10	1.4e-10	0.1515	-1.51853e-09	-1.52338e-09	-1.52332e-09	-1.52337e-09	-1.52471e-09	-1.52165e-09	-1.50461e-09	-1.5093e-09	-1.53705e-09	0.610035	-1.23468e-11	-2.15941e-11	1.23502e-11	2.62364e-11	3.70422e-11	5.40166e-11	7.09905e-11	1.04947e-10	1.38903e-10
0.61104	-3.70292e-11	-1.38946e-11	-4.63154e-12	1.85273e-11	4.62974e-11	4.62963e-11	7.56209e-11	1.26553e-10	2.34579e-10	0.15175	-1.01829e-10	-9.11356e-11	-1.00268e-10	-1.07966e-10	-9.7236e-11	-1.00359e-10	-9.25151e-11	-9.57018e-11	-1.12587e-10	0.61104	-1.54e-11	-3.09e-12	7.72e-12	2.93e-11	3.7e-11	7.41e-11	8.18e-11	1.14e-10	1.42e-10	0.15175	-1.51707e-09	-1.53237e-09	-1.53094e-09	-1.53243e-09	-1.52014e-09	-1.51712e-09	-1.49854e-09	-1.50782e-09	-1.52338e-09	0.61104	-2.00582e-11	-1.23519e-11	1.85138e-11	2.6233e-11	3.70399e-11	5.40177e-11	6.945e-11	1.17283e-10	1.52781e-10
0.612045	-2.16127e-11	-2.31459e-11	-1.0799e-11	2.93201e-11	4.62979e-11	4.62979e-11	7.25388e-11	1.29635e-10	2.31494e-10	0.152	-9.41949e-11	-1.0015e-10	-1.00268e-10	-1.03427e-10	-9.87428e-11	-9.72633e-11	-9.4113e-11	-9.72087e-11	-1.06523e-10	0.612045	-1.85e-11	-1.7e-11	7.71e-12	2.01e-11	2.93e-11	6.64e-11	8.64e-11	1.3e-10	1.53e-10	0.152	-1.51861e-09	-1.52333e-09	-1.53854e-09	-1.5325e-09	-1.51708e-09	-1.52467e-09	-1.49393e-09	-1.51238e-09	-1.53553e-09	0.612045	-1.54373e-11	-1.85149e-11	9.26477e-12	1.85211e-11	4.0122e-11	6.17302e-11	7.40782e-11	1.12664e-10	1.54328e-10
0.61305	-2.46897e-11	-2.31498e-11	-6.1737e-12	3.39477e-11	4.47563e-11	4.47586e-11	8.17895e-11	1.31177e-10	2.31496e-10	0.15225	-9.56654e-11	-8.19851e-11	-9.26607e-11	-1.03391e-10	-9.57291e-11	-1.00222e-10	-9.10901e-11	-9.56654e-11	-1.06477e-10	0.61305	-2.16e-11	-7.72e-12	-3.08e-12	2.16e-11	2.93e-11	7.72e-11	8.49e-11	1.22e-10	1.42e-10	0.15225	-1.52318e-09	-1.5324e-09	-1.52644e-09	-1.53553e-09	-1.51859e-09	-1.51716e-09	-1.49544e-09	-1.51097e-09	-1.54166e-09	0.61305	-2.31431e-11	-1.23468e-11	1.38879e-11	1.54351e-11	3.39534e-11	6.63584e-11	8.02468e-11	1.18832e-10	1.55871e-10
0.614055	-2.00666e-11	-2.46954e-11	-3.08657e-12	2.62358e-11	4.62934e-11	5.24688e-11	7.87097e-11	1.28096e-10	2.40749e-10	0.1525	-9.41585e-11	-9.5629e-11	-9.56472e-11	-1.01857e-10	-1.00368e-10	-8.814e-11	-9.4113e-11	-9.11174e-11	-1.0498e-10	0.614055	-2.62e-11	-1.23e-11	3.08e-12	3.55e-11	3.09e-11	8.18e-11	8.64e-11	1.14e-10	1.5e-10	0.1525	-1.52011e-09	-1.52789e-09	-1.53707e-09	-1.53247e-09	-1.52012e-09	-1.52774e-09	-1.49698e-09	-1.52613e-09	-1.53404e-09	0.614055	-1.38969e-11	-7.71811e-12	1.38867e-11	1.85188e-11	3.08674e-11	6.32774e-11	7.56237e-11	1.23462e-10	1.55869e-10
0.61506	-2.62341e-11	-3.39466e-11	-2.25211e-15	1.85222e-11	3.39579e-11	5.24745e-11	8.17946e-11	1.35806e-10	2.40751e-10	0.15275	-9.56836e-11	-1.00232e-10	-9.26334e-11	-1.00423e-10	-1.14048e-10	-1.04743e-10	-9.26334e-11	-9.71996e-11	-1.09491e-10	0.61506	-3.24e-11	-2.62e-11	3.09e-12	3.4e-11	3.24e-11	7.25e-11	8.49e-11	1.14e-10	1.54e-10	0.15275	-1.5125e-09	-1.52941e-09	-1.54164e-09	-1.52787e-09	-1.5186e-09	-1.52015e-09	-1.497e-09	-1.51095e-09	-1.52948e-09	0.61506	-2.46914e-11	-7.71698e-12	6.17595e-12	2.00632e-11	3.24073e-11	6.79022e-11	7.87091e-11	1.26546e-10	1.4816e-10
0.616065	-2.7778e-11	-2.77802e-11	-3.08037e-12	1.85239e-11	3.7036e-11	6.0183e-11	8.64199e-11	1.35811e-10	2.3767e-10	0.153	-9.72087e-11	-9.11356e-11	-9.56836e-11	-1.17135e-10	-1.01929e-10	-8.814e-11	-9.71814e-11	-9.87155e-11	-1.00441e-10	0.616065	-3.7e-11	-1.7e-11	6.17e-12	3.09e-11	5.09e-11	7.25e-11	9.57e-11	1.23e-10	1.57e-10	0.153	-1.51851e-09	-1.53394e-09	-1.52954e-09	-1.5263e-09	-1.51859e-09	-1.5155e-09	-1.5e-09	-1.50786e-09	-1.54012e-09	0.616065	-3.24045e-11	-9.25407e-12	6.17257e-12	2.31504e-11	2.9328e-11	6.63646e-11	8.64194e-11	1.20377e-10	1.52782e-10
0.61707	-2.62369e-11	-2.46937e-11	1.07974e-11	3.08572e-11	3.24084e-11	5.40177e-11	8.02603e-11	1.40441e-10	2.45382e-10	0.15325	-9.56836e-11	-9.56836e-11	-9.87338e-11	-1.08048e-10	-1.01811e-10	-1.00232e-10	-9.4113e-11	-9.11356e-11	-1.12587e-10	0.61707	-4.01e-11	-2.31e-11	9.26e-12	4.01e-11	4.63e-11	6.79e-11	8.18e-11	1.25e-10	1.6e-10	0.15325	-1.51089e-09	-1.52482e-09	-1.54159e-09	-1.52319e-09	-1.51861e-09	-1.51096e-09	-1.49089e-09	-1.51697e-09	-1.53863e-09	0.61707	-2.77797e-11	4.62535e-12	4.62929e-12	2.93207e-11	4.16613e-11	7.40737e-11	8.17974e-11	1.15749e-10	1.49706e-10
0.618075	-2.77802e-11	-2.46914e-11	9.26139e-12	2.00644e-11	2.62369e-11	5.55599e-11	1.00303e-10	1.51237e-10	2.51555e-10	0.1535	-9.41312e-11	-1.00259e-10	-9.56745e-11	-1.01893e-10	-9.42222e-11	-9.87701e-11	-8.65058e-11	-9.71541e-11	-1.12614e-10	0.618075	-3.86e-11	-1.54e-11	9.26e-12	3.86e-11	4.78e-11	6.48e-11	9.72e-11	1.17e-10	1.53e-10	0.1535	-1.50636e-09	-1.52478e-09	-1.52947e-09	-1.5156e-09	-1.52166e-09	-1.52004e-09	-1.49542e-09	-1.51245e-09	-1.53249e-09	0.618075	-2.46937e-11	6.17201e-12	1.54948e-12	3.08645e-11	3.39601e-11	7.09916e-11	8.64244e-11	1.18829e-10	1.66665e-10
0.61908	-3.24061e-11	-2.16032e-11	1.23435e-11	1.38924e-11	2.31493e-11	6.17285e-11	9.25993e-11	1.49701e-10	2.57727e-10	0.15375	-9.10901e-11	-9.57109e-11	-9.10719e-11	-1.01893e-10	-1.0035e-10	-9.72087e-11	-9.25333e-11	-9.11083e-11	-1.04998e-10	0.61908	-4.01e-11	-1.54e-11	1.54e-11	4.17e-11	5.4e-11	7.56e-11	9.11e-11	1.19e-10	1.5e-10	0.15375	-1.52153e-09	-1.52785e-09	-1.52938e-09	-1.52314e-09	-1.52164e-09	-1.51402e-09	-1.49695e-09	-1.51391e-09	-1.52788e-09	0.61908	-2.4692e-11	4.62929e-12	1.54272e-11	2.93258e-11	4.78367e-11	6.94511e-11	9.25936e-11	1.12661e-10	1.57419e-10
0.620085	-2.93263e-11	-1.08064e-11	7.71923e-12	1.54323e-11	2.00644e-11	6.01886e-11	9.10588e-11	1.55867e-10	2.60817e-10	0.154	-9.40857e-11	-9.56927e-11	-8.9565e-11	-1.07939e-10	-1.1246e-10	-9.25788e-11	-8.79854e-11	-9.41494e-11	-1.06496e-10	0.620085	-3.55e-11	-1.54e-11	1.54e-11	4.17e-11	5.71e-11	6.64e-11	7.87e-11	1.14e-10	1.53e-10	0.154	-1.51252e-09	-1.53091e-09	-1.52791e-09	-1.51713e-09	-1.51548e-09	-1.51706e-09	-1.49241e-09	-1.50632e-09	-1.52788e-09	0.620085	-2.31504e-11	1.54497e-12	1.38884e-11	3.70337e-11	4.7844e-11	7.71574e-11	8.95149e-11	1.09573e-10	1.58953e-10
0.62109	-3.70371e-11	-9.25857e-12	1.0803e-11	1.54295e-11	2.16082e-11	6.01875e-11	1.0339e-10	1.497e-10	2.68527e-10	0.15425	-8.80672e-11	-9.71996e-11	-9.71905e-11	-9.88065e-11	-9.12266e-11	-8.49898e-11	-8.64603e-11	-9.86792e-11	-1.09509e-10	0.62109	-3.24e-11	-3.09e-12	2.47e-11	3.86e-11	5.86e-11	6.02e-11	8.95e-11	1.11e-10	1.47e-10	0.15425	-1.52009e-09	-1.52943e-09	-1.53709e-09	-1.52465e-09	-1.50477e-09	-1.52161e-09	-1.49696e-09	-1.51083e-09	-1.53244e-09	0.62109	-2.46897e-11	3.08657e-12	9.2642e-12	3.08685e-11	5.40127e-11	6.63668e-11	9.87645e-11	1.06488e-10	1.46617e-10
0.622095	-4.01259e-11	-4.63041e-12	1.38867e-11	6.1782e-12	2.93156e-11	5.86459e-11	8.95133e-11	1.46615e-10	2.63901e-10	0.1545	-9.86428e-11	-9.41585e-11	-9.87338e-11	-9.56927e-11	-9.87065e-11	-9.55835e-11	-9.10537e-11	-8.80854e-11	-1.01929e-10	0.622095	-2.32e-11	7.71e-12	2.62e-11	4.17e-11	5.86e-11	6.33e-11	8.95e-11	1e-10	1.48e-10	0.1545	-1.52009e-09	-1.53396e-09	-1.54315e-09	-1.51254e-09	-1.5047e-09	-1.51553e-09	-1.49701e-09	-1.50776e-09	-1.53096e-09	0.622095	-1.85228e-11	4.62816e-12	1.69716e-11	3.24123e-11	5.40161e-11	7.09843e-11	9.2601e-11	1.08025e-10	1.48154e-10
0.6231	-4.47518e-11	-1.5461e-12	9.26083e-12	1.0799e-11	1.85278e-11	6.01881e-11	8.33418e-11	1.5124e-10	2.57731e-10	0.15475	-8.80127e-11	-9.41767e-11	-9.41403e-11	-9.42222e-11	-9.57018e-11	-8.95468e-11	-9.56472e-11	-9.71996e-11	-1.06505e-10	0.6231	-2.93e-11	3.09e-12	2.32e-11	3.86e-11	6.17e-11	6.17e-11	7.72e-11	9.26e-11	1.34e-10	0.15475	-1.51247e-09	-1.52787e-09	-1.52648e-09	-1.52001e-09	-1.50469e-09	-1.51396e-09	-1.50155e-09	-1.50014e-09	-1.53248e-09	0.6231	-2.16043e-11	1.54779e-12	1.23519e-11	4.32052e-11	5.70992e-11	5.71077e-11	9.72212e-11	9.72331e-11	1.45068e-10
0.624105	-4.01237e-11	-6.17313e-12	7.71867e-12	4.63379e-12	3.08617e-11	6.17313e-11	8.95088e-11	1.49699e-10	2.57727e-10	0.155	-8.49443e-11	-1.00232e-10	-8.95741e-11	-1.06396e-10	-9.57109e-11	-8.95013e-11	-9.41039e-11	-1.01811e-10	-1.14121e-10	0.624105	-2.16e-11	1.08e-11	2.78e-11	4.32e-11	5.09e-11	4.78e-11	7.87e-11	9.88e-11	1.39e-10	0.155	-1.51396e-09	-1.5248e-09	-1.53854e-09	-1.50635e-09	-1.50318e-09	-1.51241e-09	-1.49551e-09	-1.50467e-09	-1.53399e-09	0.624105	-2.0061e-11	1.07979e-11	2.31442e-11	3.55e-11	5.402e-11	6.01841e-11	8.64323e-11	1.03401e-10	1.40438e-10
0.62511	-3.08736e-11	-1.07968e-11	1.23429e-11	9.25857e-12	3.24129e-11	6.32684e-11	9.10515e-11	1.49697e-10	2.54643e-10	0.15525	-9.25697e-11	-9.26425e-11	-9.5629e-11	-1.034e-10	-1.00295e-10	-8.80036e-11	-8.65331e-11	-9.87883e-11	-1.08094e-10	0.62511	-1.39e-11	7.72e-12	3.09e-11	2.62e-11	5.25e-11	5.25e-11	7.72e-11	9.26e-11	1.39e-10	0.15525	-1.5154e-09	-1.52781e-09	-1.53096e-09	-1.51077e-09	-1.50467e-09	-1.5094e-09	-1.49999e-09	-1.50316e-09	-1.52946e-09	0.62511	-1.38907e-11	6.17144e-12	2.00678e-11	4.01242e-11	6.48111e-11	5.24756e-11	9.87611e-11	1.11109e-10	1.34272e-10
0.626115	-4.32046e-11	1.53709e-12	7.71754e-12	1.08024e-11	4.47524e-11	4.7848e-11	8.6425e-11	1.45066e-10	2.56183e-10	0.1555	-9.5629e-11	-9.2597e-11	-9.26607e-11	-1.00341e-10	-1.01875e-10	-9.2597e-11	-9.71814e-11	-9.87792e-11	-1.12641e-10	0.626115	-9.26e-12	1.54e-11	2.32e-11	2.78e-11	5.25e-11	4.94e-11	7.87e-11	1.03e-10	1.31e-10	0.1555	-1.49866e-09	-1.52475e-09	-1.52791e-09	-1.49864e-09	-1.50171e-09	-1.517e-09	-1.49085e-09	-1.50162e-09	-1.5355e-09	0.626115	-1.08013e-11	-3.08094e-12	3.08606e-11	4.16642e-11	5.71054e-11	5.55576e-11	8.64273e-11	9.87775e-11	1.4506e-10
0.62712	-3.54995e-11	-3.08431e-12	6.17257e-12	1.08081e-11	4.93789e-11	4.93834e-11	8.48806e-11	1.34271e-10	2.53097e-10	0.15575	-8.95468e-11	-9.25697e-11	-1.00232e-10	-1.01875e-10	-1.06432e-10	-9.71723e-11	-1.00286e-10	-1.00332e-10	-1.14176e-10	0.62712	-6.18e-12	9.26e-12	2.01e-11	2.78e-11	4.63e-11	4.94e-11	7.56e-11	1.02e-10	1.33e-10	0.15575	-1.50467e-09	-1.51866e-09	-1.53402e-09	-1.50466e-09	-1.51383e-09	-1.51702e-09	-1.48774e-09	-1.50162e-09	-1.53095e-09	0.62712	-3.09276e-12	3.08206e-12	2.77763e-11	3.08702e-11	6.01836e-11	5.70987e-11	8.33401e-11	1.06484e-10	1.32732e-10
0.628125	-3.85787e-11	-1.5461e-12	3.08657e-12	2.4683e-11	3.70461e-11	4.62968e-11	8.33339e-11	1.37349e-10	2.46928e-10	0.156	-8.95104e-11	-8.80309e-11	-9.41403e-11	-1.06405e-10	-1.01875e-10	-9.2597e-11	-9.8761e-11	-1.04889e-10	-1.11126e-10	0.628125	-1.54e-11	6.18e-12	1.7e-11	1.85e-11	4.17e-11	6.33e-11	7.41e-11	1.05e-10	1.28e-10	0.156	-1.50628e-09	-1.52471e-09	-1.5401e-09	-1.50314e-09	-1.50477e-09	-1.51243e-09	-1.48774e-09	-1.50321e-09	-1.52788e-09	0.628125	-1.23418e-11	-3.08319e-12	1.69795e-11	3.24078e-11	5.09317e-11	5.09323e-11	8.79627e-11	1.06487e-10	1.46605e-10
0.62913	-3.24084e-11	-7.71248e-12	0	1.23536e-11	4.47524e-11	3.85888e-11	7.2536e-11	1.32724e-10	2.46922e-10	0.15625	-8.94831e-11	-9.40857e-11	-8.804e-11	-9.72815e-11	-1.00295e-10	-8.80309e-11	-9.56108e-11	-1.00368e-10	-1.09628e-10	0.62913	-1.39e-11	1.39e-11	1.54e-11	2.31e-11	4.01e-11	5.71e-11	8.64e-11	1.1e-10	1.34e-10	0.15625	-1.51394e-09	-1.52167e-09	-1.52938e-09	-1.4986e-09	-1.50778e-09	-1.5094e-09	-1.4908e-09	-1.51392e-09	-1.52938e-09	0.62913	-9.26083e-12	-6.75634e-15	1.54345e-11	3.08634e-11	5.09284e-11	5.55582e-11	8.02502e-11	1.0803e-10	1.41986e-10
0.630135	-2.46965e-11	-3.09614e-12	-3.08882e-12	2.00632e-11	4.47552e-11	4.93778e-11	6.63685e-11	1.3118e-10	2.37671e-10	0.1565	-8.49352e-11	-9.10628e-11	-9.41312e-11	-9.71723e-11	-9.56927e-11	-9.40675e-11	-8.04418e-11	-1.04898e-10	-1.17199e-10	0.630135	-9.26e-12	9.26e-12	4.63e-12	1.85e-11	3.55e-11	6.79e-11	7.72e-11	1.13e-10	1.33e-10	0.1565	-1.51854e-09	-1.51705e-09	-1.51719e-09	-1.5062e-09	-1.50929e-09	-1.51694e-09	-1.49227e-09	-1.51848e-09	-1.52939e-09	0.630135	-9.26252e-12	-1.54283e-11	1.85183e-11	2.31526e-11	5.09267e-11	6.01847e-11	7.09927e-11	1.11118e-10	1.48154e-10
0.63114	-2.77752e-11	-2.46813e-11	-1.23395e-11	2.93173e-11	4.47547e-11	4.01333e-11	8.02445e-11	1.3272e-10	2.43835e-10	0.15675	-8.9474e-11	-8.95559e-11	-9.87338e-11	-8.80582e-11	-9.26334e-11	-8.8049e-11	-9.7145e-11	-1.01866e-10	-1.09619e-10	0.63114	-1.85e-11	-1.54e-12	7.71e-12	1.7e-11	3.24e-11	7.25e-11	8.03e-11	1.14e-10	1.54e-10	0.15675	-1.51403e-09	-1.51245e-09	-1.52926e-09	-1.50622e-09	-1.50323e-09	-1.50638e-09	-1.48007e-09	-1.5048e-09	-1.52939e-09	0.63114	-1.6975e-11	-1.85166e-11	1.85143e-11	2.46892e-11	4.63002e-11	5.55593e-11	6.63634e-11	1.17288e-10	1.49697e-10
0.632145	-2.00694e-11	-1.54379e-11	-3.08995e-12	2.46914e-11	4.32131e-11	5.2466e-11	7.71653e-11	1.28095e-10	2.39213e-10	0.157	-8.79945e-11	-9.5629e-11	-9.72269e-11	-9.41494e-11	-9.56836e-11	-9.56381e-11	-1.00268e-10	-1.00341e-10	-1.09619e-10	0.632145	-1.08e-11	-7.72e-12	3.09e-12	1.7e-11	3.09e-11	7.1e-11	8.64e-11	1.17e-10	1.5e-10	0.157	-1.52158e-09	-1.51394e-09	-1.51864e-09	-1.50163e-09	-1.50923e-09	-1.51848e-09	-1.47849e-09	-1.50787e-09	-1.52938e-09	0.632145	-2.16037e-11	-1.38896e-11	4.63942e-12	1.69801e-11	4.62968e-11	5.40228e-11	6.79039e-11	1.20373e-10	1.48162e-10
0.63315	-3.08606e-11	-2.0061e-11	-3.08995e-12	1.69817e-11	4.47507e-11	4.93851e-11	7.71653e-11	1.31179e-10	2.45383e-10	0.15725	-9.10537e-11	-9.26243e-11	-9.56836e-11	-1.01775e-10	-9.87338e-11	-9.56927e-11	-9.57109e-11	-1.03336e-10	-1.17208e-10	0.63315	-2.62e-11	-1.23e-11	6.17e-12	2.62e-11	4.01e-11	7.87e-11	8.8e-11	1.22e-10	1.53e-10	0.15725	-1.51247e-09	-1.51248e-09	-1.51554e-09	-1.50012e-09	-1.49861e-09	-1.51242e-09	-1.48161e-09	-1.52457e-09	-1.52632e-09	0.63315	-2.00649e-11	-9.26477e-12	1.69699e-11	2.00627e-11	4.16698e-11	7.40658e-11	6.79101e-11	1.15747e-10	1.65122e-10
0.634155	-2.77774e-11	-2.00638e-11	-1.23389e-11	2.4692e-11	3.39601e-11	4.63002e-11	8.02507e-11	1.32724e-10	2.53095e-10	0.1575	-9.41039e-11	-9.41312e-11	-9.41949e-11	-9.57291e-11	-9.56654e-11	-9.72723e-11	-9.56927e-11	-9.57928e-11	-1.11135e-10	0.634155	-3.24e-11	-2.16e-11	1.54e-12	2.47e-11	3.24e-11	7.41e-11	8.95e-11	1.25e-10	1.57e-10	0.1575	-1.5124e-09	-1.52156e-09	-1.51856e-09	-1.50614e-09	-1.50156e-09	-1.5063e-09	-1.49379e-09	-1.5094e-09	-1.52476e-09	0.634155	-2.46903e-11	-1.8511e-11	1.23474e-11	2.3147e-11	4.01237e-11	6.17387e-11	8.33272e-11	1.12662e-10	1.55876e-10
0.63516	-2.00689e-11	-2.31487e-11	-1.54722e-12	3.08617e-11	4.47485e-11	4.78463e-11	8.33367e-11	1.38894e-10	2.51551e-10	0.15775	-9.10537e-11	-9.41767e-11	-1.01766e-10	-9.71905e-11	-8.96014e-11	-1.06377e-10	-9.71996e-11	-1.06396e-10	-1.08057e-10	0.63516	-2.93e-11	-2.01e-11	1.54e-12	2.62e-11	3.24e-11	8.02e-11	1.02e-10	1.22e-10	1.53e-10	0.15775	-1.50934e-09	-1.51095e-09	-1.51706e-09	-1.49398e-09	-1.49551e-09	-1.50929e-09	-1.48774e-09	-1.50627e-09	-1.52323e-09	0.63516	-2.31504e-11	-4.63379e-12	1.08024e-11	2.00655e-11	3.39579e-11	6.94444e-11	7.10006e-11	1.15746e-10	1.57415e-10
0.636165	-2.93179e-11	-2.46892e-11	-1.54103e-12	2.62341e-11	3.70394e-11	6.1724e-11	8.48817e-11	1.4198e-10	2.39218e-10	0.158	-8.80036e-11	-1.00232e-10	-9.42131e-11	-9.26698e-11	-9.86701e-11	-9.72906e-11	-9.41585e-11	-1.01875e-10	-1.09555e-10	0.636165	-2.78e-11	-1.7e-11	4.63e-12	3.09e-11	4.78e-11	7.41e-11	9.41e-11	1.27e-10	1.64e-10	0.158	-1.50785e-09	-1.51245e-09	-1.51704e-09	-1.49539e-09	-1.49997e-09	-1.50629e-09	-1.48466e-09	-1.50778e-09	-1.52316e-09	0.636165	-2.46937e-11	-1.54666e-12	7.71585e-12	2.46948e-11	4.32074e-11	6.79095e-11	8.48744e-11	1.18829e-10	1.60499e-10
0.63717	-2.62409e-11	-1.69801e-11	4.62872e-12	1.69817e-11	3.08668e-11	5.55593e-11	8.95088e-11	1.40443e-10	2.51554e-10	0.15825	-9.10264e-11	-9.26061e-11	-9.87247e-11	-1.00268e-10	-9.11356e-11	-9.87701e-11	-9.41676e-11	-1.00295e-10	-1.08012e-10	0.63717	-3.55e-11	-2.78e-11	7.72e-12	4.01e-11	4.78e-11	7.25e-11	1.06e-10	1.19e-10	1.56e-10	0.15825	-1.51694e-09	-1.52006e-09	-1.51559e-09	-1.48782e-09	-1.48779e-09	-1.51086e-09	-1.48461e-09	-1.50785e-09	-1.51249e-09	0.63717	-2.93235e-11	-7.71304e-12	3.08938e-12	3.54905e-11	4.01288e-11	8.02434e-11	8.17991e-11	1.12661e-10	1.55873e-10
0.638175	-3.70366e-11	-2.0061e-11	7.71754e-12	2.31459e-11	2.77785e-11	5.24745e-11	8.9511e-11	1.49692e-10	2.59272e-10	0.1585	-8.95195e-11	-8.64603e-11	-9.57291e-11	-1.0025e-10	-9.71996e-11	-1.00304e-10	-9.86792e-11	-9.572e-11	-1.03455e-10	0.638175	-4.17e-11	-1.85e-11	1.7e-11	4.01e-11	4.63e-11	7.25e-11	8.95e-11	1.25e-10	1.51e-10	0.1585	-1.50791e-09	-1.51555e-09	-1.52774e-09	-1.4954e-09	-1.48616e-09	-1.51239e-09	-1.4801e-09	-1.51853e-09	-1.51399e-09	0.638175	-3.70343e-11	-4.62704e-12	6.1737e-12	3.2409e-11	4.62951e-11	7.25394e-11	9.25908e-11	1.09577e-10	1.55873e-10
0.63918	-4.16642e-11	-1.852e-11	1.38873e-11	2.00627e-11	2.31498e-11	5.71026e-11	9.10498e-11	1.40444e-10	2.68521e-10	0.15875	-8.95104e-11	-8.64421e-11	-1.00241e-10	-8.96378e-11	-9.86883e-11	-1.00359e-10	-8.8049e-11	-9.72451e-11	-1.08048e-10	0.63918	-4.17e-11	-1.08e-11	1.7e-11	4.17e-11	5.4e-11	7.41e-11	1.02e-10	1.16e-10	1.53e-10	0.15875	-1.51854e-09	-1.51857e-09	-1.52172e-09	-1.49541e-09	-1.48154e-09	-1.50933e-09	-1.49068e-09	-1.5186e-09	-1.52009e-09	0.63918	-3.24078e-11	6.16807e-12	1.08013e-11	2.93269e-11	4.32153e-11	7.87035e-11	8.64329e-11	1.17282e-10	1.60498e-10
0.640185	-3.3959e-11	-1.85138e-11	1.38912e-11	1.6975e-11	2.00627e-11	6.48145e-11	8.18002e-11	1.45069e-10	2.5002e-10	0.159	-8.95377e-11	-8.94558e-11	-9.26425e-11	-1.00286e-10	-8.65877e-11	-1.0793e-10	-9.10628e-11	-1.01775e-10	-1.15673e-10	0.640185	-3.24e-11	-1.08e-11	1.7e-11	4.17e-11	4.78e-11	7.25e-11	9.88e-11	1.11e-10	1.53e-10	0.159	-1.52011e-09	-1.5186e-09	-1.52312e-09	-1.49085e-09	-1.47546e-09	-1.50628e-09	-1.48005e-09	-1.52013e-09	-1.51861e-09	0.640185	-2.4697e-11	3.08938e-12	1.0803e-11	3.8581e-11	4.93845e-11	7.40776e-11	1.04934e-10	1.04946e-10	1.5587e-10
0.64119	-4.47507e-11	-3.09107e-12	1.85155e-11	1.08035e-11	1.69823e-11	6.3278e-11	8.95071e-11	1.51237e-10	2.54641e-10	0.15925	-9.4113e-11	-8.34283e-11	-9.26243e-11	-1.06405e-10	-1.01702e-10	-9.88611e-11	-9.57291e-11	-9.27335e-11	-1.11126e-10	0.64119	-2.62e-11	-1.55e-12	2.01e-11	4.01e-11	5.71e-11	5.56e-11	9.26e-11	1.08e-10	1.47e-10	0.15925	-1.51705e-09	-1.52009e-09	-1.50799e-09	-1.49236e-09	-1.48309e-09	-1.50928e-09	-1.47697e-09	-1.52163e-09	-1.52013e-09	0.64119	-2.93151e-11	7.71473e-12	1.08047e-11	4.47507e-11	5.40115e-11	6.94489e-11	9.7228e-11	1.00316e-10	1.46615e-10
0.642195	-4.32131e-11	-2.25211e-15	1.23496e-11	6.17482e-12	3.086e-11	7.09848e-11	8.79705e-11	1.4507e-10	2.5773e-10	0.1595	-9.41039e-11	-9.25515e-11	-9.71723e-11	-9.87974e-11	-9.11356e-11	-1.0488e-10	-1.07848e-10	-1.06332e-10	-1.08103e-10	0.642195	-3.09e-11	-1.13e-15	2.47e-11	3.7e-11	6.17e-11	7.1e-11	8.18e-11	1.03e-10	1.45e-10	0.1595	-1.51397e-09	-1.51402e-09	-1.52611e-09	-1.49382e-09	-1.48915e-09	-1.50322e-09	-1.48149e-09	-1.51553e-09	-1.5201e-09	0.642195	-1.38946e-11	7.71304e-12	1.54317e-11	3.85872e-11	4.93879e-11	6.79039e-11	9.2597e-11	1.03399e-10	1.4661e-10
0.6432	-4.47518e-11	-3.086e-12	1.54328e-11	6.17426e-12	2.93224e-11	6.1733e-11	9.5678e-11	1.41983e-10	2.65441e-10	0.15975	-8.80218e-11	-9.41585e-11	-9.26516e-11	-9.57018e-11	-9.41767e-11	-1.00286e-10	-8.96742e-11	-9.4295e-11	-1.17199e-10	0.6432	-2.01e-11	-1.54e-12	2.62e-11	3.86e-11	5.56e-11	5.4e-11	8.02e-11	1.02e-10	1.39e-10	0.15975	-1.51242e-09	-1.51705e-09	-1.51107e-09	-1.48163e-09	-1.47548e-09	-1.50775e-09	-1.47542e-09	-1.51393e-09	-1.514e-09	0.6432	-1.23451e-11	-1.53765e-12	1.69801e-11	4.62912e-11	5.24733e-11	6.48173e-11	8.79683e-11	1.03396e-10	1.41983e-10
0.644205	-3.70416e-11	-4.62704e-12	1.85138e-11	9.26083e-12	2.77814e-11	5.71026e-11	8.79688e-11	1.40439e-10	2.62362e-10	0.16	-9.10355e-11	-9.87338e-11	-9.72178e-11	-9.57018e-11	-1.03336e-10	-9.1081e-11	-9.86974e-11	-1.07912e-10	-1.1108e-10	0.644205	-1.54e-11	3.09e-12	2.93e-11	3.09e-11	5.4e-11	5.25e-11	7.41e-11	9.72e-11	1.45e-10	0.16	-1.51093e-09	-1.52002e-09	-1.52771e-09	-1.48165e-09	-1.47831e-09	-1.50628e-09	-1.47694e-09	-1.50782e-09	-1.51398e-09	0.644205	-7.71923e-12	4.6276e-12	2.93145e-11	3.39562e-11	6.01852e-11	6.01881e-11	8.6425e-11	9.26004e-11	1.38896e-10
0.64521	-3.70382e-11	1.53934e-12	6.17651e-12	1.54328e-11	3.24123e-11	5.5556e-11	8.48823e-11	1.38893e-10	2.68525e-10	0.16025	-9.10628e-11	-9.72542e-11	-1.00241e-10	-9.8761e-11	-1.01848e-10	-8.6524e-11	-9.57291e-11	-1.01948e-10	-9.89157e-11	0.64521	-6.18e-12	9.26e-12	3.09e-11	3.24e-11	5.4e-11	5.09e-11	7.41e-11	9.26e-11	1.34e-10	0.16025	-1.51847e-09	-1.50336e-09	-1.5217e-09	-1.49837e-09	-1.45555e-09	-1.5108e-09	-1.4815e-09	-1.50776e-09	-1.51702e-09	0.64521	-1.08013e-11	4.6276e-12	2.00678e-11	3.24095e-11	6.01858e-11	5.55593e-11	8.79643e-11	9.10577e-11	1.35809e-10
0.646215	-3.54921e-11	-3.08375e-12	3.08657e-12	2.16043e-11	4.62918e-11	4.78485e-11	8.64194e-11	1.29641e-10	2.57731e-10	0.1605	-9.25697e-11	-1.00241e-10	-9.11629e-11	-1.00304e-10	-9.88247e-11	-9.86519e-11	-1.00268e-10	-1.11025e-10	-1.11035e-10	0.646215	-6.17e-12	9.26e-12	3.09e-11	2.01e-11	5.56e-11	5.56e-11	7.25e-11	9.88e-11	1.31e-10	0.1605	-1.50634e-09	-1.51993e-09	-1.52012e-09	-1.48935e-09	-1.47219e-09	-1.50328e-09	-1.47696e-09	-1.5032e-09	-1.51553e-09	0.646215	-9.26026e-12	-1.54159e-12	2.46914e-11	3.24061e-11	5.40189e-11	5.40127e-11	8.1794e-11	1.00312e-10	1.32726e-10
0.64722	-2.46999e-11	-4.50423e-15	-1.12606e-15	2.31493e-11	4.1672e-11	5.86375e-11	7.5626e-11	1.35803e-10	2.531e-10	0.16075	-8.95195e-11	-9.11629e-11	-1.00286e-10	-1.00277e-10	-1.04861e-10	-9.11447e-11	-9.7236e-11	-1.04934e-10	-1.09519e-10	0.64722	-9.26e-12	1.54e-11	2.01e-11	3.09e-11	5.09e-11	4.63e-11	6.48e-11	1.06e-10	1.34e-10	0.16075	-1.50931e-09	-1.50326e-09	-1.51551e-09	-1.4939e-09	-1.47232e-09	-1.5154e-09	-1.47843e-09	-1.50624e-09	-1.51855e-09	0.64722	-9.25914e-12	-3.08713e-12	2.62341e-11	2.46965e-11	5.86408e-11	4.63036e-11	7.56248e-11	1.04942e-10	1.40441e-10
0.648225	-3.39483e-11	-9.25689e-12	-6.16807e-12	2.46914e-11	4.62929e-11	4.93879e-11	7.87052e-11	1.25013e-10	2.51557e-10	0.161	-8.79399e-11	-1.0025e-10	-1.04898e-10	-9.4204e-11	-9.72906e-11	-9.86792e-11	-9.572e-11	-9.73178e-11	-9.88702e-11	0.648225	-1.23e-11	6.18e-12	1.54e-11	2.78e-11	4.01e-11	5.09e-11	7.25e-11	1.06e-10	1.34e-10	0.161	-1.50931e-09	-1.50313e-09	-1.51247e-09	-1.49846e-09	-1.47693e-09	-1.51089e-09	-1.47385e-09	-1.50779e-09	-1.51553e-09	0.648225	-7.72036e-12	-6.17257e-12	2.31515e-11	2.7778e-11	5.24745e-11	5.24705e-11	8.02485e-11	1.04943e-10	1.5432e-10
0.64923	-3.24067e-11	-1.08052e-11	1.53765e-12	2.31493e-11	3.55045e-11	4.78412e-11	7.56215e-11	1.34262e-10	2.5464e-10	0.16125	-8.1885e-11	-9.8761e-11	-1.01866e-10	-9.87247e-11	-1.00277e-10	-9.11356e-11	-1.00277e-10	-1.04971e-10	-1.04898e-10	0.64923	-1.39e-11	1.39e-11	1.54e-11	2.31e-11	4.17e-11	6.17e-11	7.25e-11	1.03e-10	1.39e-10	0.16125	-1.50624e-09	-1.49857e-09	-1.51855e-09	-1.49243e-09	-1.483e-09	-1.50938e-09	-1.47242e-09	-1.5093e-09	-1.51707e-09	0.64923	-1.69722e-11	-7.71698e-12	2.62336e-11	2.77785e-11	5.40127e-11	5.55565e-11	7.87052e-11	1.03403e-10	1.45074e-10
0.650235	-2.46982e-11	-1.85177e-11	-6.16694e-12	2.16099e-11	4.93806e-11	4.47558e-11	7.40793e-11	1.32721e-10	2.51555e-10	0.1615	-9.09718e-11	-9.57291e-11	-1.00277e-10	-9.56927e-11	-9.72269e-11	-9.7145e-11	-9.87792e-11	-1.17189e-10	-1.03464e-10	0.650235	-9.26e-12	4.63e-12	1.7e-11	1.7e-11	3.09e-11	6.79e-11	7.25e-11	1.11e-10	1.37e-10	0.1615	-1.50175e-09	-1.50161e-09	-1.51859e-09	-1.49851e-09	-1.4724e-09	-1.5154e-09	-1.49217e-09	-1.50631e-09	-1.52158e-09	0.650235	-1.54351e-11	-1.08019e-11	2.3147e-11	2.62341e-11	4.93834e-11	5.40172e-11	7.09944e-11	1.09573e-10	1.497e-10
0.65124	-3.24022e-11	-2.16032e-11	3.07756e-12	3.08629e-11	5.09239e-11	4.32114e-11	7.71636e-11	1.28096e-10	2.48469e-10	0.16175	-8.65149e-11	-1.00259e-10	-9.2688e-11	-9.41676e-11	-9.41949e-11	-8.95559e-11	-9.87883e-11	-1.12641e-10	-1.12578e-10	0.65124	-1.08e-11	-1.55e-12	1.23e-11	1.85e-11	3.86e-11	7.56e-11	7.56e-11	1.17e-10	1.48e-10	0.16175	-1.51993e-09	-1.50473e-09	-1.51864e-09	-1.5016e-09	-1.47993e-09	-1.50479e-09	-1.48158e-09	-1.51387e-09	-1.50936e-09	0.65124	-2.00582e-11	-1.08052e-11	1.38912e-11	2.00621e-11	4.01271e-11	5.86448e-11	7.25332e-11	1.14202e-10	1.57408e-10
0.652245	-2.1611e-11	-1.69795e-11	-1.23367e-11	3.2405e-11	4.01304e-11	4.01282e-11	7.87063e-11	1.32718e-10	2.46932e-10	0.162	-9.71359e-11	-9.57382e-11	-1.00268e-10	-9.71723e-11	-1.00241e-10	-8.95286e-11	-1.01829e-10	-1.05025e-10	-1.08084e-10	0.652245	-1.23e-11	-1.39e-11	7.72e-12	1.24e-11	2.93e-11	7.1e-11	8.18e-11	1.23e-10	1.56e-10	0.162	-1.50479e-09	-1.51233e-09	-1.52619e-09	-1.50157e-09	-1.4739e-09	-1.5093e-09	-1.47542e-09	-1.50635e-09	-1.50164e-09	0.652245	-1.23508e-11	-1.69733e-11	9.26364e-12	1.23513e-11	3.54978e-11	6.32752e-11	7.09933e-11	1.15745e-10	1.45077e-10
0.65325	-2.46886e-11	-2.16065e-11	-1.54554e-12	2.31538e-11	4.32108e-11	4.4753e-11	7.71687e-11	1.2501e-10	2.62349e-10	0.16225	-9.26243e-11	-1.00286e-10	-1.00241e-10	-9.10719e-11	-9.42222e-11	-9.25788e-11	-1.00313e-10	-1.11062e-10	-1.12596e-10	0.65325	-2.16e-11	-9.26e-12	2.25e-15	1.7e-11	3.86e-11	7.72e-11	9.41e-11	1.25e-10	1.53e-10	0.16225	-1.50467e-09	-1.50471e-09	-1.51407e-09	-1.49393e-09	-1.47844e-09	-1.50929e-09	-1.47699e-09	-1.51696e-09	-1.49856e-09	0.65325	-1.69795e-11	-1.54306e-11	1.54272e-11	1.85155e-11	3.70371e-11	6.94461e-11	7.56175e-11	1.14204e-10	1.54323e-10
0.654255	-1.69817e-11	-2.77752e-11	3.086e-12	2.62358e-11	4.32086e-11	4.32164e-11	8.79643e-11	1.28093e-10	2.531e-10	0.1625	-9.26152e-11	-1.00268e-10	-8.81036e-11	-8.8049e-11	-1.01811e-10	-9.26152e-11	-9.87519e-11	-1.08039e-10	-1.06487e-10	0.654255	-2.93e-11	-1.85e-11	-1.54e-12	2.78e-11	4.48e-11	8.18e-11	9.11e-11	1.19e-10	1.54e-10	0.1625	-1.49856e-09	-1.49856e-09	-1.52006e-09	-1.49236e-09	-1.47845e-09	-1.50316e-09	-1.48916e-09	-1.51239e-09	-1.50158e-09	0.654255	-3.086e-11	-7.71698e-12	6.1782e-12	1.38969e-11	3.39534e-11	7.09916e-11	7.09939e-11	1.15745e-10	1.497e-10
0.65526	-2.4692e-11	-2.31493e-11	6.1737e-12	2.93201e-11	3.39545e-11	5.40115e-11	9.10503e-11	1.31183e-10	2.46931e-10	0.16275	-9.55926e-11	-9.26425e-11	-9.86974e-11	-9.86974e-11	-1.01802e-10	-9.56654e-11	-9.41585e-11	-1.06505e-10	-1.00368e-10	0.65526	-4.32e-11	-1.54e-11	5.63e-16	2.62e-11	4.32e-11	7.56e-11	9.88e-11	1.27e-10	1.61e-10	0.16275	-1.497e-09	-1.49856e-09	-1.51402e-09	-1.49236e-09	-1.47537e-09	-1.49698e-09	-1.4831e-09	-1.50321e-09	-1.4986e-09	0.65526	-2.93246e-11	-1.5461e-12	1.07968e-11	2.93156e-11	3.395e-11	7.4072e-11	7.40782e-11	1.12662e-10	1.48159e-10
0.656265	-3.0864e-11	-1.85222e-11	1.0799e-11	2.62353e-11	3.08634e-11	5.55605e-11	8.48885e-11	1.45066e-10	2.56183e-10	0.163	-8.34738e-11	-9.26243e-11	-9.72269e-11	-9.71996e-11	-9.26425e-11	-9.56654e-11	-9.26516e-11	-1.0803e-10	-1.03391e-10	0.656265	-2.62e-11	-2.31e-11	3.09e-12	2.78e-11	4.01e-11	7.25e-11	9.72e-11	1.2e-10	1.67e-10	0.163	-1.4985e-09	-1.50308e-09	-1.51708e-09	-1.49234e-09	-1.47082e-09	-1.49084e-09	-1.47697e-09	-1.50323e-09	-1.5077e-09	0.656265	-3.39511e-11	-3.08431e-12	-1.53596e-12	2.62381e-11	2.7787e-11	6.17375e-11	7.87097e-11	1.15746e-10	1.57408e-10
0.65727	-3.2409e-11	-2.16037e-11	4.63379e-12	2.16088e-11	2.16122e-11	6.32718e-11	1.00304e-10	1.52781e-10	2.59269e-10	0.16325	-9.40857e-11	-9.71814e-11	-9.57018e-11	-9.1081e-11	-9.11356e-11	-9.25879e-11	-1.00268e-10	-1.09564e-10	-1.04925e-10	0.65727	-4.01e-11	-2.16e-11	1.23e-11	3.7e-11	5.25e-11	7.87e-11	9.88e-11	1.23e-10	1.6e-10	0.16325	-1.4955e-09	-1.49397e-09	-1.52619e-09	-1.48932e-09	-1.47843e-09	-1.48939e-09	-1.47844e-09	-1.5154e-09	-1.50162e-09	0.65727	-3.54938e-11	1.54216e-12	6.16638e-12	2.9323e-11	4.32063e-11	6.63612e-11	8.95037e-11	1.18833e-10	1.46618e-10
0.658275	-3.39522e-11	-1.85194e-11	9.25857e-12	2.46914e-11	2.93179e-11	6.32752e-11	9.10565e-11	1.48155e-10	2.56189e-10	0.1635	-9.56381e-11	-9.41403e-11	-9.72633e-11	-8.95559e-11	-1.03282e-10	-8.80218e-11	-1.00323e-10	-1.09555e-10	-1.03427e-10	0.658275	-3.7e-11	-1.08e-11	7.72e-12	4.17e-11	5.4e-11	6.64e-11	1.02e-10	1.14e-10	1.48e-10	0.1635	-1.50149e-09	-1.49696e-09	-1.5155e-09	-1.4954e-09	-1.47993e-09	-1.50765e-09	-1.47537e-09	-1.50936e-09	-1.49701e-09	0.658275	-3.2409e-11	3.086e-12	-4.62084e-12	3.39472e-11	4.32091e-11	7.0991e-11	8.18008e-11	1.21914e-10	1.51242e-10
0.65928	-3.54933e-11	-1.54351e-11	1.08002e-11	2.46897e-11	2.46937e-11	6.4814e-11	8.95144e-11	1.43528e-10	2.63899e-10	0.16375	-8.95377e-11	-9.11265e-11	-1.04916e-10	-9.56108e-11	-9.58019e-11	-9.25788e-11	-1.01839e-10	-1.06532e-10	-1.06468e-10	0.65928	-4.17e-11	-4.63e-12	2.31e-11	4.32e-11	5.86e-11	6.79e-11	9.26e-11	1.13e-10	1.62e-10	0.16375	-1.48627e-09	-1.49546e-09	-1.50483e-09	-1.49386e-09	-1.46781e-09	-1.50315e-09	-1.47071e-09	-1.50776e-09	-1.49702e-09	0.65928	-2.93224e-11	3.08826e-12	9.25294e-12	2.4697e-11	3.55028e-11	7.56147e-11	9.25903e-11	1.09578e-10	1.5741e-10
0.660285	-3.08719e-11	-1.85166e-11	4.63604e-12	1.69772e-11	2.31504e-11	5.5565e-11	9.87662e-11	1.46612e-10	2.63903e-10	0.164	-8.804e-11	-1.00241e-10	-1.07975e-10	-8.95286e-11	-1.07884e-10	-9.41585e-11	-1.00295e-10	-1.11098e-10	-1.06423e-10	0.660285	-2.78e-11	-3.09e-12	2.01e-11	4.63e-11	6.33e-11	6.94e-11	8.95e-11	1.11e-10	1.59e-10	0.164	-1.48622e-09	-1.49697e-09	-1.51543e-09	-1.48621e-09	-1.47995e-09	-1.4971e-09	-1.46011e-09	-1.50177e-09	-1.50311e-09	0.660285	-2.62353e-11	7.71473e-12	4.63604e-12	2.77825e-11	4.78412e-11	6.32825e-11	8.48851e-11	1.09573e-10	1.51241e-10
0.66129	-4.32052e-11	-1.38879e-11	1.54283e-11	1.23502e-11	2.46925e-11	6.48157e-11	9.72263e-11	1.51238e-10	2.6853e-10	0.16425	-9.87247e-11	-9.71905e-11	-1.01884e-10	-8.64512e-11	-9.58201e-11	-9.87338e-11	-9.57382e-11	-1.12641e-10	-9.57746e-11	0.66129	-3.24e-11	-1.54e-12	2.93e-11	3.7e-11	5.09e-11	6.79e-11	9.26e-11	1.1e-10	1.48e-10	0.16425	-1.49234e-09	-1.49545e-09	-1.51395e-09	-1.48317e-09	-1.48302e-09	-1.51074e-09	-1.47682e-09	-1.52143e-09	-1.50161e-09	0.66129	-2.16082e-11	7.71585e-12	1.69722e-11	4.0122e-11	5.86375e-11	7.25304e-11	8.95088e-11	1.08027e-10	1.41985e-10
0.662295	-3.70416e-11	-4.63435e-12	1.38896e-11	1.85143e-11	2.62369e-11	6.79e-11	9.41392e-11	1.46616e-10	2.7007e-10	0.1645	-1.01793e-10	-8.80672e-11	-1.00386e-10	-8.79581e-11	-1.06396e-10	-9.7236e-11	-1.00295e-10	-1.11126e-10	-1.00295e-10	0.662295	-3.09e-11	-1.54e-12	2.16e-11	4.17e-11	5.86e-11	5.71e-11	8.8e-11	1.05e-10	1.37e-10	0.1645	-1.49549e-09	-1.49545e-09	-1.51091e-09	-1.49225e-09	-1.47387e-09	-1.50164e-09	-1.47688e-09	-1.50025e-09	-1.50009e-09	0.662295	-2.31487e-11	6.1737e-12	1.852e-11	4.32119e-11	4.93924e-11	7.09894e-11	8.95099e-11	9.87769e-11	1.41983e-10
0.6633	-3.85832e-11	-7.71585e-12	1.23474e-11	1.08041e-11	3.08662e-11	5.86459e-11	8.79688e-11	1.54323e-10	2.59276e-10	0.16475	-9.41949e-11	-9.56745e-11	-1.10998e-10	-8.7949e-11	-1.01829e-10	-9.71632e-11	-1.01839e-10	-1.11116e-10	-1.01848e-10	0.6633	-2.01e-11	7.71e-12	2.93e-11	4.32e-11	5.4e-11	6.17e-11	7.25e-11	9.72e-11	1.34e-10	0.16475	-1.50614e-09	-1.49693e-09	-1.51396e-09	-1.48315e-09	-1.47075e-09	-1.49701e-09	-1.46927e-09	-1.50925e-09	-1.50159e-09	0.6633	-2.31481e-11	6.17313e-12	2.16043e-11	4.62951e-11	6.01824e-11	6.48185e-11	8.79688e-11	1.08024e-10	1.43523e-10
0.664305	-4.32091e-11	-9.25914e-12	1.3885e-11	6.17482e-12	3.70343e-11	5.24745e-11	8.64228e-11	1.48157e-10	2.59267e-10	0.165	-9.56927e-11	-1.01875e-10	-1.01875e-10	-8.49534e-11	-9.27153e-11	-8.6524e-11	-1.00323e-10	-1.11062e-10	-1.01857e-10	0.664305	-2.47e-11	9.26e-12	2.47e-11	3.4e-11	5.56e-11	6.17e-11	7.25e-11	1e-10	1.34e-10	0.165	-1.50013e-09	-1.48938e-09	-1.51697e-09	-1.48317e-09	-1.4677e-09	-1.49702e-09	-1.47232e-09	-1.50475e-09	-1.49855e-09	0.664305	-2.00621e-11	6.17426e-12	2.00627e-11	4.01259e-11	5.55582e-11	6.01847e-11	9.1052e-11	1.00314e-10	1.37354e-10
0.66531	-4.01271e-11	-9.25857e-12	3.09332e-12	6.17539e-12	3.08724e-11	5.40127e-11	8.17951e-11	1.4661e-10	2.45391e-10	0.16525	-9.87338e-11	-1.1098e-10	-9.57564e-11	-9.41039e-11	-1.03327e-10	-9.25515e-11	-1.00341e-10	-1.0192e-10	-1.01866e-10	0.66531	-9.27e-12	1.08e-11	2.01e-11	3.24e-11	5.86e-11	5.71e-11	7.87e-11	9.41e-11	1.34e-10	0.16525	-1.50314e-09	-1.50001e-09	-1.50783e-09	-1.49536e-09	-1.47078e-09	-1.50309e-09	-1.4799e-09	-1.50771e-09	-1.49856e-09	0.66531	-1.54317e-11	9.25632e-12	1.852e-11	3.54995e-11	5.09306e-11	4.6307e-11	8.95071e-11	9.41414e-11	1.35806e-10
0.666315	-4.1667e-11	-6.17313e-12	1.07996e-11	1.23463e-11	4.32046e-11	4.93901e-11	8.02547e-11	1.38896e-10	2.5464e-10	0.1655	-9.57382e-11	-9.73269e-11	-1.01775e-10	-9.7236e-11	-1.01857e-10	-9.10719e-11	-1.04916e-10	-1.03436e-10	-1.03409e-10	0.666315	-1.08e-11	4.63e-12	2.78e-11	2.93e-11	5.86e-11	5.25e-11	7.41e-11	1.11e-10	1.28e-10	0.1655	-1.50306e-09	-1.50002e-09	-1.5063e-09	-1.4939e-09	-1.4784e-09	-1.49856e-09	-1.46928e-09	-1.49706e-09	-1.50307e-09	0.666315	-7.72036e-12	3.08769e-12	1.852e-11	4.1663e-11	5.24722e-11	5.55548e-11	7.87097e-11	9.10599e-11	1.26557e-10
0.66732	-3.8581e-11	-3.08826e-12	9.25801e-12	1.85183e-11	3.55012e-11	5.86352e-11	8.95031e-11	1.32727e-10	2.57727e-10	0.16575	-1.01766e-10	-1.00295e-10	-9.42131e-11	-1.01839e-10	-1.00304e-10	-9.25879e-11	-1.04952e-10	-1.11053e-10	-1.06477e-10	0.66732	-1.08e-11	1.08e-11	1.54e-11	2.62e-11	4.63e-11	5.86e-11	7.41e-11	1.05e-10	1.31e-10	0.16575	-1.48635e-09	-1.49085e-09	-1.51386e-09	-1.49232e-09	-1.47542e-09	-1.4985e-09	-1.47076e-09	-1.49859e-09	-1.49248e-09	0.66732	-1.0803e-11	-1.12606e-15	2.00621e-11	3.24112e-11	5.55571e-11	5.55588e-11	7.40838e-11	1.04938e-10	1.37349e-10
0.668325	-3.24084e-11	-4.62985e-12	3.08431e-12	2.1606e-11	4.32069e-11	4.16782e-11	7.87103e-11	1.3889e-10	2.57724e-10	0.166	-9.26698e-11	-1.00304e-10	-9.87338e-11	-1.034e-10	-9.72906e-11	-9.25788e-11	-1.0645e-10	-1.08094e-10	-1.08003e-10	0.668325	-1.39e-11	1.54e-11	2.47e-11	2.31e-11	4.48e-11	5.4e-11	7.1e-11	1.03e-10	1.36e-10	0.166	-1.49846e-09	-1.48781e-09	-1.50474e-09	-1.48473e-09	-1.48e-09	-1.494e-09	-1.47385e-09	-1.51076e-09	-1.50311e-09	0.668325	-1.3889e-11	-6.17201e-12	2.00649e-11	2.93213e-11	5.55565e-11	5.70981e-11	8.64154e-11	1.03401e-10	1.40438e-10
0.66933	-2.46931e-11	-6.17539e-12	-9.25407e-12	2.4692e-11	3.7045e-11	5.09222e-11	7.56226e-11	1.29638e-10	2.46929e-10	0.16625	-9.57291e-11	-9.88429e-11	-9.71905e-11	-1.04889e-10	-1.04934e-10	-8.95832e-11	-1.01902e-10	-1.15673e-10	-1.04961e-10	0.66933	-7.72e-12	7.71e-12	1.54e-11	1.85e-11	4.94e-11	6.02e-11	7.87e-11	1.05e-10	1.48e-10	0.16625	-1.49852e-09	-1.49851e-09	-1.50162e-09	-1.49226e-09	-1.48304e-09	-1.50615e-09	-1.47991e-09	-1.50318e-09	-1.50623e-09	0.66933	-1.54289e-11	-9.26083e-12	2.62302e-11	2.31504e-11	5.09284e-11	4.93918e-11	7.56237e-11	1.04946e-10	1.41982e-10
0.670335	-1.8525e-11	-1.3889e-11	-6.17708e-12	2.6233e-11	4.78328e-11	4.32086e-11	7.71619e-11	1.2501e-10	2.45378e-10	0.1665	-1.06341e-10	-1.09464e-10	-8.96287e-11	-9.72723e-11	-1.11016e-10	-9.87155e-11	-1.04907e-10	-1.11171e-10	-1.04925e-10	0.670335	-1.54e-11	-4.62e-12	1.23e-11	2.16e-11	3.4e-11	7.25e-11	7.56e-11	1.13e-10	1.44e-10	0.1665	-1.49696e-09	-1.50614e-09	-1.50011e-09	-1.4832e-09	-1.47695e-09	-1.50315e-09	-1.46931e-09	-1.49851e-09	-1.50615e-09	0.670335	-6.18045e-12	-1.54295e-11	1.69761e-11	2.00655e-11	4.62963e-11	6.01847e-11	7.25354e-11	1.12659e-10	1.43524e-10
0.67134	-2.77712e-11	-2.00576e-11	-1.38822e-11	2.00689e-11	3.39618e-11	2.62488e-11	7.25394e-11	1.31177e-10	2.33043e-10	0.16675	-9.26698e-11	-1.01902e-10	-1.01711e-10	-9.72542e-11	-1.00432e-10	-9.8761e-11	-1.01839e-10	-1.15655e-10	-1.01866e-10	0.67134	-1.23e-11	-4.5e-15	1.23e-11	2.31e-11	3.55e-11	7.87e-11	8.33e-11	1.14e-10	1.47e-10	0.16675	-1.49088e-09	-1.497e-09	-1.50466e-09	-1.49081e-09	-1.47535e-09	-1.49858e-09	-1.47529e-09	-1.49086e-09	-1.49099e-09	0.67134	-1.69705e-11	-1.23474e-11	7.72374e-12	2.46869e-11	3.5504e-11	6.17308e-11	7.25332e-11	1.17291e-10	1.40442e-10
0.672345	-1.54385e-11	-1.2353e-11	-1.55004e-12	3.08595e-11	4.62929e-11	4.47507e-11	8.17901e-11	1.32721e-10	2.39208e-10	0.167	-9.10992e-11	-1.01784e-10	-8.96105e-11	-1.01793e-10	-1.09509e-10	-9.72087e-11	-9.57382e-11	-1.05016e-10	-1.00313e-10	0.672345	-1.85e-11	-7.71e-12	4.5e-15	1.39e-11	3.24e-11	7.41e-11	8.8e-11	1.14e-10	1.48e-10	0.167	-1.49692e-09	-1.49083e-09	-1.50162e-09	-1.4984e-09	-1.46915e-09	-1.50305e-09	-1.46621e-09	-1.49082e-09	-1.50614e-09	0.672345	-1.23502e-11	-1.23468e-11	1.85104e-11	1.38935e-11	4.78356e-11	6.17319e-11	6.94489e-11	1.24999e-10	1.45066e-10
0.67335	-1.85183e-11	-2.31436e-11	-7.71022e-12	2.46954e-11	4.32102e-11	5.09267e-11	8.02524e-11	1.31181e-10	2.43839e-10	0.16725	-9.72178e-11	-8.9656e-11	-9.40584e-11	-9.57564e-11	-1.08084e-10	-9.26334e-11	-9.87247e-11	-1.06505e-10	-9.88156e-11	0.67335	-2.93e-11	-7.72e-12	-5.63e-16	2.16e-11	3.55e-11	8.18e-11	9.11e-11	1.1e-10	1.48e-10	0.16725	-1.49239e-09	-1.48783e-09	-1.50011e-09	-1.48475e-09	-1.45397e-09	-1.48932e-09	-1.47227e-09	-1.49229e-09	-1.50475e-09	0.67335	-1.85177e-11	-1.38867e-11	4.63435e-12	1.38907e-11	4.32091e-11	6.32752e-11	6.94506e-11	1.12666e-10	1.4353e-10
0.674355	-1.85211e-11	-1.85222e-11	3.08319e-12	2.62375e-11	3.54961e-11	5.24694e-11	8.33339e-11	1.34268e-10	2.48463e-10	0.1675	-1.01839e-10	-1.01775e-10	-8.49989e-11	-1.01839e-10	-1.15655e-10	-9.41494e-11	-9.41767e-11	-1.11071e-10	-1.04889e-10	0.674355	-3.7e-11	-7.72e-12	-1.54e-12	2.62e-11	4.01e-11	8.03e-11	9.88e-11	1.17e-10	1.64e-10	0.1675	-1.49386e-09	-1.50153e-09	-1.50467e-09	-1.4892e-09	-1.4722e-09	-1.48472e-09	-1.47384e-09	-1.48324e-09	-1.51085e-09	0.674355	-2.00632e-11	-7.72092e-12	3.08826e-12	1.69801e-11	3.08736e-11	6.63601e-11	7.71614e-11	1.1883e-10	1.55869e-10
0.67536	-2.31487e-11	-2.16048e-11	4.63041e-12	3.2405e-11	2.93235e-11	4.7848e-11	7.71704e-11	1.43525e-10	2.37674e-10	0.16775	-1.03327e-10	-1.00341e-10	-9.56381e-11	-1.0488e-10	-1.08075e-10	-9.72451e-11	-9.56654e-11	-1.08075e-10	-1.01866e-10	0.67536	-3.55e-11	-1.39e-11	1.08e-11	3.24e-11	4.63e-11	8.18e-11	9.88e-11	1.23e-10	1.57e-10	0.16775	-1.48925e-09	-1.50163e-09	-1.50319e-09	-1.48161e-09	-1.47532e-09	-1.49378e-09	-1.47683e-09	-1.49837e-09	-1.51236e-09	0.67536	-2.31498e-11	-1.38856e-11	6.17482e-12	3.08567e-11	4.01237e-11	6.63634e-11	7.71642e-11	1.17288e-10	1.60496e-10
0.676365	-2.62364e-11	-2.16043e-11	7.71811e-12	2.77769e-11	2.62381e-11	6.01824e-11	8.79655e-11	1.51236e-10	2.48467e-10	0.168	-9.2688e-11	-1.03364e-10	-9.87338e-11	-9.72723e-11	-1.07975e-10	-1.033e-10	-9.42131e-11	-1.12587e-10	-1.00295e-10	0.676365	-3.86e-11	-1.85e-11	3.09e-12	3.4e-11	4.94e-11	7.87e-11	9.72e-11	1.2e-10	1.54e-10	0.168	-1.48162e-09	-1.50465e-09	-1.50771e-09	-1.48313e-09	-1.46779e-09	-1.48322e-09	-1.46467e-09	-1.4878e-09	-1.50472e-09	0.676365	-2.77746e-11	-9.25914e-12	1.38839e-11	2.00694e-11	4.4753e-11	7.25321e-11	7.7167e-11	1.12661e-10	1.49705e-10
0.67737	-3.08623e-11	-1.69789e-11	1.54283e-11	1.69806e-11	2.93207e-11	5.71049e-11	9.41369e-11	1.41987e-10	2.56184e-10	0.16825	-9.71905e-11	-1.00313e-10	-9.56836e-11	-9.72178e-11	-9.89157e-11	-9.26971e-11	-1.04852e-10	-1.04998e-10	-9.57473e-11	0.67737	-3.4e-11	-2.47e-11	9.26e-12	3.86e-11	5.56e-11	7.41e-11	9.88e-11	1.22e-10	1.53e-10	0.16825	-1.48463e-09	-1.49859e-09	-1.49859e-09	-1.49068e-09	-1.48143e-09	-1.49388e-09	-1.4676e-09	-1.48924e-09	-1.50014e-09	0.67737	-2.00689e-11	-3.08488e-12	6.17708e-12	2.77763e-11	4.32125e-11	7.2536e-11	8.48767e-11	1.1112e-10	1.57414e-10
0.678375	-2.62414e-11	-2.00582e-11	1.08052e-11	1.85183e-11	2.77808e-11	6.32718e-11	9.10543e-11	1.4661e-10	2.60813e-10	0.1685	-9.57473e-11	-9.72087e-11	-9.26152e-11	-9.572e-11	-1.14076e-10	-9.86883e-11	-1.00286e-10	-1.06468e-10	-1.01775e-10	0.678375	-4.01e-11	-1.08e-11	1.7e-11	4.01e-11	5.4e-11	8.18e-11	9.72e-11	1.14e-10	1.53e-10	0.1685	-1.48617e-09	-1.50314e-09	-1.50004e-09	-1.47702e-09	-1.47543e-09	-1.50156e-09	-1.46007e-09	-1.48619e-09	-1.50621e-09	0.678375	-2.93162e-11	7.71248e-12	9.25857e-12	2.77825e-11	4.32131e-11	7.71597e-11	8.17991e-11	1.2037e-10	1.62039e-10
0.67938	-3.70366e-11	-1.08064e-11	1.23474e-11	1.69778e-11	3.08645e-11	6.17274e-11	8.95093e-11	1.45071e-10	2.59273e-10	0.16875	-1.04798e-10	-9.11356e-11	-9.26607e-11	-1.00313e-10	-1.0803e-10	-9.1172e-11	-9.11902e-11	-1.04925e-10	-9.4204e-11	0.67938	-3.7e-11	-7.72e-12	2.47e-11	4.78e-11	5.4e-11	6.17e-11	9.11e-11	1.08e-10	1.56e-10	0.16875	-1.48615e-09	-1.50463e-09	-1.49554e-09	-1.48006e-09	-1.47842e-09	-1.50001e-09	-1.47371e-09	-1.4847e-09	-1.50628e-09	0.67938	-2.16099e-11	7.71811e-12	9.25801e-12	3.70326e-11	4.62996e-11	6.9454e-11	9.25959e-11	1.14205e-10	1.51243e-10
0.680385	-4.16653e-11	-1.08024e-11	1.69711e-11	2.00565e-11	3.08674e-11	4.93935e-11	8.48845e-11	1.49696e-10	2.62358e-10	0.169	-8.96469e-11	-9.87338e-11	-1.03236e-10	-1.04843e-10	-1.0192e-10	-1.03336e-10	-1.04798e-10	-1.00341e-10	-9.71905e-11	0.680385	-3.55e-11	-1.55e-12	2.47e-11	4.78e-11	5.4e-11	6.33e-11	9.41e-11	9.72e-11	1.56e-10	0.169	-1.48009e-09	-1.49398e-09	-1.50765e-09	-1.49226e-09	-1.47389e-09	-1.48773e-09	-1.46616e-09	-1.49377e-09	-1.51238e-09	0.680385	-2.4692e-11	1.23435e-11	4.63492e-12	2.93291e-11	5.24694e-11	7.87018e-11	1.00306e-10	1.1266e-10	1.45071e-10
0.68139	-3.70411e-11	-9.25745e-12	7.72092e-12	6.17933e-12	3.54916e-11	6.0183e-11	9.10515e-11	1.48158e-10	2.639e-10	0.16925	-9.71632e-11	-1.00268e-10	-8.65422e-11	-9.2688e-11	-1.06468e-10	-1.04898e-10	-9.42222e-11	-1.00259e-10	-9.41949e-11	0.68139	-3.86e-11	-1.54e-12	3.09e-11	4.63e-11	6.17e-11	6.17e-11	9.41e-11	1.03e-10	1.48e-10	0.16925	-1.48758e-09	-1.49698e-09	-1.49708e-09	-1.48774e-09	-1.47844e-09	-1.47701e-09	-1.46615e-09	-1.4817e-09	-1.5124e-09	0.68139	-2.62347e-11	9.26026e-12	1.3885e-11	4.01186e-11	5.24711e-11	7.25349e-11	8.79722e-11	1.1266e-10	1.46613e-10
0.682395	-3.85815e-11	-1.54441e-12	1.08024e-11	9.2552e-12	2.93269e-11	5.71026e-11	9.10565e-11	1.54324e-10	2.60814e-10	0.1695	-9.41767e-11	-9.42404e-11	-8.95468e-11	-9.56654e-11	-1.07948e-10	-9.88156e-11	-9.72178e-11	-9.11447e-11	-1.00286e-10	0.682395	-3.09e-11	4.63e-12	3.09e-11	4.32e-11	6.02e-11	5.56e-11	8.64e-11	1.06e-10	1.48e-10	0.1695	-1.47093e-09	-1.50008e-09	-1.50154e-09	-1.48615e-09	-1.4784e-09	-1.48151e-09	-1.47067e-09	-1.49387e-09	-1.50929e-09	0.682395	-2.46903e-11	7.71585e-12	1.08064e-11	3.2418e-11	5.093e-11	6.79056e-11	8.95099e-11	1.14198e-10	1.51235e-10
0.6834	-3.85815e-11	3.08319e-12	1.2344e-11	6.19332e-15	3.54933e-11	5.70992e-11	9.87651e-11	1.49699e-10	2.56187e-10	0.16975	-9.72269e-11	-1.04816e-10	-9.86701e-11	-9.57291e-11	-9.58292e-11	-1.00332e-10	-9.87974e-11	-9.72451e-11	-1.01784e-10	0.6834	-1.85e-11	4.63e-12	2.62e-11	4.17e-11	5.71e-11	5.25e-11	8.18e-11	1.02e-10	1.48e-10	0.16975	-1.48459e-09	-1.50466e-09	-1.49398e-09	-1.47998e-09	-1.46773e-09	-1.47848e-09	-1.46159e-09	-1.50157e-09	-1.49857e-09	0.6834	-1.69789e-11	4.63041e-12	1.69744e-11	4.93766e-11	5.40144e-11	6.63567e-11	8.95093e-11	1.03403e-10	1.37357e-10
0.684405	-3.70394e-11	-1.53991e-12	7.71867e-12	7.71529e-12	3.54955e-11	5.0934e-11	9.2597e-11	1.46614e-10	2.57726e-10	0.17	-1.0025e-10	-9.4204e-11	-9.1081e-11	-1.03355e-10	-1.07966e-10	-1.0488e-10	-1.04843e-10	-1.06359e-10	-9.11538e-11	0.684405	-2.16e-11	9.26e-12	2.16e-11	3.4e-11	5.56e-11	5.25e-11	8.02e-11	9.72e-11	1.3e-10	0.17	-1.49075e-09	-1.50162e-09	-1.50013e-09	-1.46934e-09	-1.46767e-09	-1.47847e-09	-1.46915e-09	-1.50158e-09	-1.49551e-09	0.684405	-1.69744e-11	3.08713e-12	1.852e-11	4.32125e-11	5.55576e-11	5.24773e-11	8.64228e-11	1.00315e-10	1.37354e-10
0.68541	-3.70388e-11	3.08319e-12	9.26026e-12	1.23446e-11	3.5495e-11	6.01807e-11	8.6425e-11	1.48147e-10	2.53099e-10	0.17025	-9.25879e-11	-9.41312e-11	-8.79945e-11	-1.03345e-10	-1.09537e-10	-9.88338e-11	-9.42404e-11	-9.42313e-11	-9.71814e-11	0.68541	-1.7e-11	1.23e-11	1.7e-11	3.55e-11	5.86e-11	5.56e-11	7.56e-11	1e-10	1.39e-10	0.17025	-1.48618e-09	-1.5001e-09	-1.51534e-09	-1.48147e-09	-1.46921e-09	-1.47844e-09	-1.46765e-09	-1.49545e-09	-1.50464e-09	0.68541	-1.23468e-11	3.08206e-12	2.16043e-11	3.85827e-11	5.55576e-11	5.40144e-11	8.02547e-11	1.00309e-10	1.41984e-10
0.686415	-3.70394e-11	-1.54216e-12	1.23418e-11	1.23502e-11	3.39545e-11	4.93907e-11	8.33379e-11	1.28104e-10	2.50013e-10	0.1705	-8.33919e-11	-9.25879e-11	-8.95013e-11	-9.4204e-11	-1.04989e-10	-1.03327e-10	-1.0015e-10	-9.72178e-11	-9.56927e-11	0.686415	-1.08e-11	4.63e-12	2.47e-11	2.78e-11	4.78e-11	5.71e-11	6.95e-11	9.26e-11	1.33e-10	0.1705	-1.4816e-09	-1.50314e-09	-1.50323e-09	-1.47999e-09	-1.4723e-09	-1.47388e-09	-1.46459e-09	-1.49086e-09	-1.50322e-09	0.686415	-9.26083e-12	-9.25069e-12	2.00627e-11	3.54938e-11	5.40166e-11	5.40149e-11	8.48783e-11	8.79773e-11	1.52778e-10
0.68742	-3.8577e-11	-3.08713e-12	3.08826e-12	2.31431e-11	3.85815e-11	5.40104e-11	8.17946e-11	1.38889e-10	2.50009e-10	0.17075	-8.33737e-11	-8.95923e-11	-8.94831e-11	-9.56927e-11	-1.07975e-10	-9.57837e-11	-7.89258e-11	-9.87883e-11	-9.56745e-11	0.68742	-1.39e-11	4.63e-12	2.01e-11	2.47e-11	4.78e-11	5.25e-11	7.25e-11	1.13e-10	1.34e-10	0.17075	-1.48459e-09	-1.50317e-09	-1.50315e-09	-1.47539e-09	-1.47688e-09	-1.47691e-09	-1.46303e-09	-1.49382e-09	-1.51229e-09	0.68742	-9.25914e-12	3.07925e-12	1.85188e-11	2.7783e-11	5.70975e-11	5.40149e-11	8.33373e-11	1.03397e-10	1.45066e-10
[truncated: 2,896 more rows]
[truncated: 50 more columns]

## Sheet: Fig. 5B
Values are current densites (in pA/pF) at pH 7.4 for GFP-TMEM206 from indicated species, transfected into TMEM206 KO cells. Replicates are individual cells.
Human	Naked mole-rat	Chicken	Green anole	Zebrafish	Acorn worm	untransfected
[truncated: 11 more rows]

## Sheet: Fig. 5C
Values are current densites (in pA/pF) at pH 5 for GFP-TMEM206 from indicated species, transfected into TMEM206 KO cells. Replicates are individual cells.
[truncated: 12 more rows]

[truncated: 6 more sheets: Fig. 5D, Fig. 5E, Fig. 5F, Fig. 5G, Fig. 5H, Fig. 5I]
