# Supplementary material for: Identification of TMEM206 proteins as pore of PAORAC/ASOR acid-sensitive chloride channels
Source: eLife. 2019 Jul 18;8:e49187. doi: 10.7554/eLife.49187 (PMC6663466; doi:10.7554/eLife.49187)
Supplement: Figure 6—source data 1. [file elife-49187-fig6-data1.xlsx]

## Sheet: Fig. 6A
Representative timecourses of ASOR currents (normalized to maximum at pH5.25) carried by indicated hTMEM206 mutants transfected into TMEM206 KO cells upon MTSES exposure (perfusion protocol indicated)
Time (s)	WT	L315C	I307C
0	0.0047716	0.82	0.00177403
4.082	0.00312484	0.83	4.9776e-07
8.138	-0.0015793	0.8	0.00048366
12.19	-0.000874	0.77	-0.0004838
16.25	-0.0011086	0.76	-0.0014513
20.306	-0.0025207	0.77	-0.0006453
24.362	-0.0018139	0.78	0.00032222
28.422	-0.0025207	0.82	-0.0001609
32.475	-0.0041675	0.75	0.00016078
36.597	0.0280592	0.76	0.00725721
40.715	0.009005	0.85	0.00709577	<- pH5.25
44.826	-0.000874	0.76	-0.0008067
48.948	0.0148867	0.77	0.0820834
53.071	0.823359	0.87	0.637002
57.185	0.983769	0.9	0.904541
61.315	1	1	0.974042
65.422	0.98284	0.97	1
69.544	0.962846	0.97	0.992102
73.667	0.945906	0.92	0.993879	<- pH5.25 + MTSES
77.836	0.935783	0.86	0.989686
82.016	0.940254	0.98	0.983879
86.209	0.953903	1.64	0.946144
90.386	0.969426	2.8	0.892764
94.559	0.972244	4.03	0.84245
98.744	0.972481	5.05	0.809709
102.93	0.950141	6.09	0.765527
107.11	0.949196	7.05	0.734888
111.29	0.941671	7.88	0.701984
115.47	0.932728	8.8	0.66893
119.71	0.925439	9.66	0.65296
123.89	0.894629	10.24	0.622971
128.08	0.881925	10.85	0.597814
132.25	0.856042	11.37	0.578778
136.44	0.839811	11.87	0.559266
140.62	0.834411	12.33	0.546525
144.8	0.822178	12.82	0.52879
148.98	0.808293	13.37	0.516049
153.16	0.813945	13.8	0.496699
157.35	0.805711	14.31	0.485247
161.52	0.794423	14.7	0.46815
165.7	0.793242	14.92	0.460415
169.88	0.803601	15.32	0.44944
174.06	0.794423	15.63	0.436548
178.24	0.79066	16.05	0.431542
182.43	0.785953	16.4	0.417349
186.6	0.783827	16.63	0.404294
190.79	0.777719	17.08	0.401065
194.97	0.774192	17.31	0.389939
199.15	0.773012	17.74	0.379776
203.33	0.781954	17.96	0.380264
207.51	0.771611	18.38	0.365583
211.7	0.780537	18.66	0.364457
215.87	0.780301	18.93	0.352529
220.05	0.774429	19.09	0.343655
224.23	0.771831	19.52	0.341077
228.41	0.777955	19.81	0.343167
232.59	0.767139	20.16	0.332691
236.77	0.772776	20.61	0.327534
240.95	0.769013	20.87	0.322854
245.2	0.775373	21.25	0.31995
249.44	0.67493	21.79	0.278184	<- pH7.4 + MTSES
253.68	0.0111225	4.45	0.12111
257.93	0.00971188	4.64	0.0841798
262.17	0.00971188	4.72	0.0657964
266.41	0.0118278	4.45	0.0609579
270.66	0.0122985	4.64	0.054024
274.9	0.0101826	4.72	0.054024
279.15	0.0108879	3.92	0.0503144
283.39	0.0120639	4.03	0.0480565
287.69	0.0137107	4.09	0.0474119
291.94	0.0127692	4.07	0.0440251
296.18	0.01324	4.1	0.047089
300.43	0.0139453	4.12	0.0454769
304.66	0.0139453	4.14	0.0456384
308.91	0.0122985	4.38	0.0469276
313.15	0.0139453	4.48	0.0459601
317.4	0.0108879	4.39	0.0432191
321.64	0.0125347	4.35	0.0477348
325.88	0.0127692	4.39	0.0453155
330.13	0.014416	4.47	0.0472505
334.37	0.0139453	4.64	0.046283
338.61	0.0134746	4.7	0.0449926
342.85	0.0146506	4.57	0.0454769
347.1	0.0139453	4.58	0.0432191
351.35	0.0146506	4.58	0.0457987
355.58	0.0158266	4.62	0.0472505
359.83	0.0141814	4.6	0.0441866
364.07	0.0153575	4.67	0.0457987
368.31	0.01324	4.78	0.043542
372.62	0.0146506	4.67	0.0438637
376.92	0.0127692	4.57	0.0391877	<- pH5.25
381.24	0.0193563	19.18	0.0524108
385.54	0.563199	21.23	0.146755
389.85	0.948488	20.85	0.208997
394.15	1.04893	21.02	0.219647
398.46	1.05058	21.64	0.228672
402.76	1.05175	21.34	0.237058
407.06	1.04164	21.13	0.236895
411.37	1.04211	21.79	0.238997
415.73	1.02683	21.24	0.234967
420.04	1.00894	21.42	0.241738
424.35	0.992239	21.23	0.241088
428.65	0.978841	21.16	0.24254
432.96	0.966844	21.1	0.246407
437.27	0.955084	21.05	0.24319
441.58	0.950141	20.99	0.243353
445.88	0.934618	21.05	0.245118
450.19	0.928257	20.95	0.244642
454.49	0.920732	20.88	0.239961
458.86	0.926856	21.22	0.243353
463.22	0.954848	21.11	0.215292
467.59	0.0264125	4.45	0.0538626
471.96	0.0115932	3.53	0.0372527
476.33	0.00971188	3.55	0.0306406
480.7	0.0280592	3.57	0.0272538
485.06	0.0104172	3.75	0.0259635
489.43	0.0565217	3.68	0.0256406
493.8	0.0115932	4.28	0.0225767
498.11	0.0134746	3.92	0.0233839
502.47	0.0118278	4.15	0.0225767

## Sheet: Fig. 6B
MTSES effect (ratio IMTSES/Icontrol) on ASOR currents carried by indicated hTMEM206 mutants transfected into TMEM206 KO cells. Each value represents a measurement from an individual cell (values for +/-80 mV were taken from the same cells)
TM1, +80 mV
WT	R87C	Y86C	V85C	L84C	F83C	V82C	A81C	V80C	A79C	M78C	L77C	L76C	L75C	Y74C	I73C	F72C	I71C	L70C	L69C	V68C	S67C	F66C	V65C
1.04	0.89	0.84	1.09	1.11	0.94	1.31	1.08	0.96	0.82	1.11	0.86	1.88	1.88	1.07	0.98	1.13	1.07	1.17	1	1.18	0.97	0.83	1.09
1.05	0.9	0.78	1.05	0.86	1.07	1.31	0.99	0.98	0.87	0.87	0.82	1.2	1	1.15	1.53	1.33	1.01	1.14	1	0.98	1.06	0.98	1.01
1.27	0.84	0.69	0.94	0.75	1.48	1.53	1.03	0.99	0.8	0.72	0.94	1.31	1.57	0.83	1.28	1.19	1.6	0.87	0.91	1.07	0.85	0.91
1.05				0.91	1.33				0.74		0.94	1	1.28		1.05		0.91	1
0.78				0.7	1.05							1	0.94		0.95
1.05												0.99	1.26
1.15
TM1, -80 mV
WT	R87C	Y86C	V85C	L84C	F83C	V82C	A81C	V80C	A79C	M78C	L77C	L76C	L75C	Y74C	I73C	F72C	I71C	L70C	L69C	V68C	S67C	F66C	V65C
-0.97	-0.64	-0.79	-1.75	-7.47	-2.84	-0.91	-1.08	-1.26	-1.54	-1.15	-1.31	-1.31	-1.03	-1.67	-1.19	-1.55	-1.64	-1.44	-1.79	-1.46	-1.1	-2.3	-2.13
-2.02	-0.52	-0.6	-1.61	-7.78	-2.73	-2.26	-2.28	-1.07	-1.28	-1.03	-3.17	-0.95	-0.75	-1.39	-1.31	-2.07	-1.54	-0.86	-1.27	-1.94	-1.71	-1.45	-1.54
-0.88	-0.56	-0.58	-1.28	-5.46	-1.87	-2.1	-0.79	-1.06	-1.12	-0.73	-2.46	-1.13	-1.98	-1.14	-1.46	-1.35	-1.38	-0.97				-1.24
-1.58				-7.72	-0.98				-1.57			-1.49	-1.11		-1.55
-0.8				-6.23	-2.15							-1.97	-0.68		-1.11
-0.98													-0.86
-1.14
TM2, +80 mV
WT	T300C	A301C	N302C	P303C	W304C	N305C	T306C	I307C	A308C	L309C	L310C	C311	G312C	A313C	F314C	L315C	A316C	L317C	F318C	K319C	A320C	A321C
1.04	1.32	1.33	1.15	0.94	0.99	0.76	0.77	0.57	0.79	NA	0.6	NA	3.54	0.91	0.87	7.62	0.26	0.78	1.48	NA	0.98	0.91
1.05	0.94	1.33	1.4	0.82	0.97	1.06	0.65	0.26	1		0.55		12.51	0.97	0.9	13.28	0.3	0.8	1.08		1.33	0.76
1.27	1.33	1.62	0.86	0.82	1.37	0.71	0.62	0.48	1.05		0.99		3.56	1.19	1.1	13.26	0.55	0.59	1.18		1.02	0.85
1.05	1.02	1.18	1.43					0.35			0.99		6.31				0.29	1.06
0.78		1.32	0.92					0.19			0.7		3.18				0.35
1.05								0.36			0.91		5.56
1.15
TM2, -80 mV
WT	T300C	A301C	N302C	P303C	W304C	N305C	T306C	I307C	A308C	L309C	L310C	C311	G312C	A313C	F314C	L315C	A316C	L317C	F318C	K319C	A320C	A321C
-0.97	-0.33	-2.08	-1.3	-0.64	-2.69	-1.15	-0.86	-0.95	-1.37	NA	-0.98	NA	-22.24	-1.68	-1.05	-10.13	-3.44	-0.68	-1.68	NA	-0.9	-1.46
-2.02	-2.35	-1.6	-1.47	-0.64	-5.72	-1.46	-1.19	-0.84	-1.41		-0.82		-34.91	-1.46	-1.24	-21.06	-4.52	-1.59	-0.66		-1.94	-0.82
-0.88	-1.29	-2.08	-1.6	-1.08	-6.78	-1.17	-1.06	-0.9	-2.64		-0.88		-2.9	-2.22	-1.12	-19.49	-2.16	-1	-1.24		-1.89	-1.02
-1.58	-1.22	-2.02	-1.12					-0.42			-1.18		-4.42				-16.16	-1.27
-0.8		-1.68	-1.5					-0.31					-41.45				-3.39
-0.98								-0.35			-1.18		-43.84
-1.14

## Sheet: Fig. 6C
Currents (in A) as a function of voltage (in V) for the indicated hTMEM206 mutants, transfected into TMEM206 KO cells at pH5.25 before and after MTSES treatment
Voltage (V)	L84C	L84C MTSES	W304C	W304C MTSES	I307C	I307C MTSES	G312C	G312C MTSES	L315C	L315C MTSES	A316C	A316C MTSES
-0.08003	-3.24e-10	-2.66e-09	-3.32e-10	-1.36e-09	-2.39e-10	-7.1e-11	-8.49e-11	-2.08e-09	-4.17e-11	-1.62e-09	-6.19e-10	-2.33e-09
-0.07978	-3.12e-10	-2.65e-09	-3.35e-10	-1.36e-09	-2.64e-10	-7.41e-11	-8.03e-11	-2.06e-09	-4.32e-11	-1.61e-09	-6.23e-10	-2.33e-09
-0.07944	-3.09e-10	-2.66e-09	-3.3e-10	-1.34e-09	-2.48e-10	-6.64e-11	-7.56e-11	-2.06e-09	-4.01e-11	-1.59e-09	-6.14e-10	-2.32e-09
-0.0791	-3.18e-10	-2.64e-09	-3.41e-10	-1.34e-09	-2.41e-10	-7.1e-11	-6.02e-11	-2.05e-09	-3.4e-11	-1.58e-09	-6.13e-10	-2.31e-09
-0.07878	-3.1e-10	-2.63e-09	-3.49e-10	-1.34e-09	-2.41e-10	-6.48e-11	-6.02e-11	-2.04e-09	-3.86e-11	-1.58e-09	-6.2e-10	-2.3e-09
-0.07847	-3.24e-10	-2.62e-09	-3.36e-10	-1.32e-09	-2.45e-10	-6.79e-11	-6.94e-11	-2.05e-09	-3.4e-11	-1.56e-09	-6.23e-10	-2.3e-09
-0.07816	-2.96e-10	-2.62e-09	-3.29e-10	-1.34e-09	-2.41e-10	-6.64e-11	-8.18e-11	-2.04e-09	-2.93e-11	-1.56e-09	-6.07e-10	-2.28e-09
-0.07778	-3.12e-10	-2.59e-09	-3.3e-10	-1.35e-09	-2.62e-10	-6.33e-11	-7.41e-11	-2.04e-09	-2.78e-11	-1.55e-09	-6.17e-10	-2.27e-09
-0.07753	-3.12e-10	-2.59e-09	-3.18e-10	-1.34e-09	-2.59e-10	-5.56e-11	-9.41e-11	-2.03e-09	-3.55e-11	-1.55e-09	-6.1e-10	-2.25e-09
-0.07725	-3.09e-10	-2.58e-09	-3.3e-10	-1.33e-09	-2.47e-10	-6.02e-11	-1e-10	-2.02e-09	-2.78e-11	-1.55e-09	-6.16e-10	-2.24e-09
-0.07687	-3.16e-10	-2.57e-09	-3.38e-10	-1.34e-09	-2.44e-10	-6.48e-11	-9.41e-11	-2.03e-09	-4.01e-11	-1.54e-09	-6.07e-10	-2.23e-09
-0.07656	-3.12e-10	-2.56e-09	-3.33e-10	-1.33e-09	-2.55e-10	-7.56e-11	-8.95e-11	-2.02e-09	-2.47e-11	-1.53e-09	-6.1e-10	-2.22e-09
-0.07625	-3.16e-10	-2.55e-09	-3.3e-10	-1.35e-09	-2.55e-10	-6.79e-11	-7.87e-11	-2.01e-09	-3.39e-11	-1.53e-09	-6.1e-10	-2.19e-09
-0.0759	-3.13e-10	-2.54e-09	-3.29e-10	-1.35e-09	-2.41e-10	-6.94e-11	-8.8e-11	-2e-09	-2.32e-11	-1.54e-09	-6.11e-10	-2.18e-09
-0.07553	-3.21e-10	-2.53e-09	-3.38e-10	-1.36e-09	-2.47e-10	-6.94e-11	-9.57e-11	-2.01e-09	-4.32e-11	-1.53e-09	-6.03e-10	-2.17e-09
-0.07531	-3.27e-10	-2.53e-09	-3.33e-10	-1.37e-09	-2.56e-10	-6.48e-11	-7.72e-11	-1.99e-09	-3.4e-11	-1.53e-09	-6e-10	-2.15e-09
-0.0749	-3.18e-10	-2.53e-09	-3.38e-10	-1.36e-09	-2.5e-10	-6.48e-11	-6.64e-11	-2e-09	-3.86e-11	-1.52e-09	-6.03e-10	-2.14e-09
-0.07456	-3.29e-10	-2.52e-09	-3.32e-10	-1.36e-09	-2.45e-10	-6.94e-11	-8.02e-11	-1.99e-09	-4.17e-11	-1.51e-09	-6.03e-10	-2.13e-09
-0.07424	-3.3e-10	-2.52e-09	-3.43e-10	-1.36e-09	-2.52e-10	-7.56e-11	-8.64e-11	-1.99e-09	-4.94e-11	-1.52e-09	-6.05e-10	-2.13e-09
-0.07396	-3.41e-10	-2.53e-09	-3.49e-10	-1.38e-09	-2.55e-10	-5.71e-11	-7.25e-11	-1.98e-09	-3.86e-11	-1.52e-09	-6.11e-10	-2.1e-09
-0.07362	-3.26e-10	-2.51e-09	-3.44e-10	-1.36e-09	-2.52e-10	-7.41e-11	-8.18e-11	-1.99e-09	-4.01e-11	-1.51e-09	-6e-10	-2.11e-09
-0.07331	-3.23e-10	-2.5e-09	-3.61e-10	-1.36e-09	-2.52e-10	-7.56e-11	-5.25e-11	-1.98e-09	-2.93e-11	-1.5e-09	-6.02e-10	-2.1e-09
-0.07302	-3.21e-10	-2.5e-09	-3.47e-10	-1.37e-09	-2.47e-10	-5.87e-11	-7.71e-11	-1.98e-09	-2.47e-11	-1.5e-09	-6.03e-10	-2.08e-09
-0.07268	-3.27e-10	-2.49e-09	-3.43e-10	-1.38e-09	-2.59e-10	-6.48e-11	-4.94e-11	-1.98e-09	-4.01e-11	-1.48e-09	-6.08e-10	-2.08e-09
-0.07234	-3.27e-10	-2.48e-09	-3.44e-10	-1.37e-09	-2.62e-10	-5.86e-11	-7.41e-11	-1.97e-09	-2.78e-11	-1.47e-09	-5.97e-10	-2.07e-09
-0.07208	-3.24e-10	-2.48e-09	-3.47e-10	-1.36e-09	-2.53e-10	-5.86e-11	-7.72e-11	-1.97e-09	-4.01e-11	-1.47e-09	-6.05e-10	-2.06e-09
-0.07165	-3.23e-10	-2.47e-09	-3.47e-10	-1.37e-09	-2.55e-10	-5.56e-11	-7.56e-11	-1.96e-09	-3.4e-11	-1.46e-09	-6.02e-10	-2.05e-09
-0.0713	-3.27e-10	-2.44e-09	-3.47e-10	-1.35e-09	-2.81e-10	-5.09e-11	-6.64e-11	-1.96e-09	-3.4e-11	-1.46e-09	-5.99e-10	-2.04e-09
-0.07102	-3.32e-10	-2.44e-09	-3.41e-10	-1.38e-09	-2.76e-10	-5.09e-11	-7.41e-11	-1.95e-09	-2.78e-11	-1.44e-09	-5.97e-10	-2.02e-09
-0.07077	-3.24e-10	-2.43e-09	-3.47e-10	-1.36e-09	-2.73e-10	-5.09e-11	-6.95e-11	-1.96e-09	-3.09e-11	-1.43e-09	-5.9e-10	-2.01e-09
-0.07046	-3.18e-10	-2.43e-09	-3.47e-10	-1.37e-09	-2.84e-10	-5.86e-11	-7.56e-11	-1.94e-09	-3.24e-11	-1.42e-09	-6.03e-10	-1.98e-09
-0.07005	-3.26e-10	-2.42e-09	-3.41e-10	-1.38e-09	-2.75e-10	-6.17e-11	-7.25e-11	-1.94e-09	-2.62e-11	-1.42e-09	-5.94e-10	-1.97e-09
-0.06983	-3.29e-10	-2.39e-09	-3.3e-10	-1.38e-09	-2.75e-10	-6.64e-11	-7.56e-11	-1.92e-09	-2.93e-11	-1.43e-09	-5.94e-10	-1.96e-09
-0.06946	-3.35e-10	-2.39e-09	-3.56e-10	-1.38e-09	-2.86e-10	-5.56e-11	-1.02e-10	-1.92e-09	-2.16e-11	-1.42e-09	-5.9e-10	-1.95e-09
-0.06908	-3.43e-10	-2.38e-09	-3.46e-10	-1.38e-09	-3.18e-10	-6.79e-11	-7.41e-11	-1.92e-09	-2.47e-11	-1.42e-09	-5.9e-10	-1.94e-09
-0.06877	-3.21e-10	-2.37e-09	-3.47e-10	-1.4e-09	-2.65e-10	-5.25e-11	-6.94e-11	-1.92e-09	-2.47e-11	-1.43e-09	-5.88e-10	-1.92e-09
-0.06842	-3.29e-10	-2.36e-09	-3.5e-10	-1.39e-09	-2.84e-10	-6.94e-11	-6.64e-11	-1.91e-09	-4.94e-11	-1.42e-09	-6e-10	-1.91e-09
-0.0682	-3.29e-10	-2.36e-09	-3.58e-10	-1.39e-09	-2.75e-10	-5.71e-11	-6.17e-11	-1.91e-09	-3.09e-11	-1.41e-09	-5.97e-10	-1.9e-09
-0.06786	-3.58e-10	-2.37e-09	-3.55e-10	-1.39e-09	-2.84e-10	-5.86e-11	-6.48e-11	-1.92e-09	-3.55e-11	-1.42e-09	-6.02e-10	-1.88e-09
-0.06755	-3.46e-10	-2.36e-09	-3.53e-10	-1.39e-09	-2.79e-10	-6.48e-11	-6.02e-11	-1.91e-09	-3.09e-11	-1.41e-09	-6.03e-10	-1.88e-09
-0.06717	-3.4e-10	-2.35e-09	-3.63e-10	-1.39e-09	-2.82e-10	-6.48e-11	-7.56e-11	-1.91e-09	-3.86e-11	-1.4e-09	-6.03e-10	-1.87e-09
-0.06695	-3.36e-10	-2.36e-09	-3.63e-10	-1.39e-09	-2.67e-10	-6.79e-11	-6.17e-11	-1.91e-09	-2.47e-11	-1.39e-09	-5.94e-10	-1.87e-09
-0.06658	-3.36e-10	-2.35e-09	-3.53e-10	-1.4e-09	-2.79e-10	-5.56e-11	-6.17e-11	-1.9e-09	-2.62e-11	-1.39e-09	-5.97e-10	-1.85e-09
-0.06626	-3.47e-10	-2.33e-09	-3.41e-10	-1.41e-09	-2.82e-10	-5.56e-11	-5.56e-11	-1.89e-09	-3.09e-11	-1.36e-09	-5.85e-10	-1.85e-09
-0.06582	-3.53e-10	-2.32e-09	-3.58e-10	-1.42e-09	-2.87e-10	-5.71e-11	-6.17e-11	-1.89e-09	-2.31e-11	-1.37e-09	-5.91e-10	-1.84e-09
-0.06551	-3.41e-10	-2.31e-09	-3.55e-10	-1.41e-09	-2.96e-10	-4.78e-11	-6.94e-11	-1.89e-09	-1.54e-11	-1.36e-09	-5.94e-10	-1.83e-09
-0.06517	-3.41e-10	-2.3e-09	-3.36e-10	-1.41e-09	-2.84e-10	-4.78e-11	-7.25e-11	-1.88e-09	-2.78e-11	-1.35e-09	-5.9e-10	-1.82e-09
-0.06489	-3.41e-10	-2.29e-09	-3.61e-10	-1.41e-09	-2.89e-10	-4.48e-11	-7.1e-11	-1.88e-09	-2.16e-11	-1.34e-09	-5.86e-10	-1.81e-09
-0.0646	-3.35e-10	-2.28e-09	-3.55e-10	-1.41e-09	-3.04e-10	-4.63e-11	-7.41e-11	-1.87e-09	-2.47e-11	-1.34e-09	-5.86e-10	-1.79e-09
-0.06435	-3.27e-10	-2.27e-09	-3.75e-10	-1.41e-09	-2.98e-10	-4.63e-11	-6.17e-11	-1.86e-09	-1.85e-11	-1.33e-09	-5.82e-10	-1.78e-09
-0.06388	-3.38e-10	-2.26e-09	-3.63e-10	-1.42e-09	-3.12e-10	-4.94e-11	-6.17e-11	-1.85e-09	-9.27e-12	-1.33e-09	-5.9e-10	-1.77e-09
-0.06363	-3.38e-10	-2.24e-09	-3.66e-10	-1.43e-09	-3.13e-10	-6.48e-11	-7.56e-11	-1.85e-09	-3.09e-11	-1.33e-09	-5.93e-10	-1.74e-09
-0.06332	-3.41e-10	-2.23e-09	-3.73e-10	-1.43e-09	-3.06e-10	-5.71e-11	-6.17e-11	-1.84e-09	-2.47e-11	-1.33e-09	-6e-10	-1.73e-09
-0.06304	-3.52e-10	-2.22e-09	-3.67e-10	-1.41e-09	-2.9e-10	-6.02e-11	-9.1e-11	-1.84e-09	-9.28e-12	-1.32e-09	-5.97e-10	-1.72e-09
-0.06266	-3.52e-10	-2.21e-09	-3.63e-10	-1.42e-09	-2.98e-10	-5.71e-11	-8.33e-11	-1.84e-09	-3.7e-11	-1.31e-09	-5.85e-10	-1.71e-09
-0.06229	-3.47e-10	-2.21e-09	-3.6e-10	-1.42e-09	-2.98e-10	-4.78e-11	-6.95e-11	-1.83e-09	-2.16e-11	-1.32e-09	-5.8e-10	-1.7e-09
-0.06201	-3.4e-10	-2.2e-09	-3.72e-10	-1.43e-09	-2.87e-10	-5.86e-11	-6.64e-11	-1.82e-09	-1.7e-11	-1.32e-09	-5.94e-10	-1.68e-09
-0.06179	-3.41e-10	-2.19e-09	-3.67e-10	-1.43e-09	-3.09e-10	-5.09e-11	-6.48e-11	-1.82e-09	-2.16e-11	-1.31e-09	-6.03e-10	-1.67e-09
-0.06144	-3.44e-10	-2.19e-09	-3.72e-10	-1.43e-09	-3.12e-10	-5.25e-11	-5.86e-11	-1.8e-09	-3.39e-11	-1.31e-09	-6e-10	-1.67e-09
-0.06116	-3.43e-10	-2.2e-09	-3.78e-10	-1.43e-09	-3.04e-10	-5.25e-11	-5.56e-11	-1.81e-09	-2.62e-11	-1.31e-09	-6.03e-10	-1.65e-09
-0.06079	-3.41e-10	-2.19e-09	-3.8e-10	-1.44e-09	-3.13e-10	-5.56e-11	-6.17e-11	-1.79e-09	-3.24e-11	-1.29e-09	-5.97e-10	-1.65e-09
-0.06044	-3.49e-10	-2.17e-09	-3.84e-10	-1.42e-09	-3.19e-10	-6.33e-11	-6.33e-11	-1.8e-09	-2.78e-11	-1.28e-09	-6.1e-10	-1.64e-09
-0.0601	-3.46e-10	-2.17e-09	-3.81e-10	-1.42e-09	-3.12e-10	-5.86e-11	-5.86e-11	-1.8e-09	-2.62e-11	-1.27e-09	-5.96e-10	-1.63e-09
-0.05975	-3.63e-10	-2.16e-09	-3.77e-10	-1.43e-09	-3.13e-10	-5.25e-11	-5.09e-11	-1.8e-09	-2.78e-11	-1.26e-09	-5.97e-10	-1.63e-09
-0.0595	-3.44e-10	-2.15e-09	-3.86e-10	-1.43e-09	-3.1e-10	-4.78e-11	-5.25e-11	-1.79e-09	-2.01e-11	-1.27e-09	-5.94e-10	-1.62e-09
-0.05916	-3.4e-10	-2.13e-09	-3.87e-10	-1.43e-09	-3.12e-10	-4.01e-11	-7.41e-11	-1.78e-09	-1.08e-11	-1.25e-09	-5.91e-10	-1.61e-09
-0.05875	-3.44e-10	-2.14e-09	-3.94e-10	-1.43e-09	-3.29e-10	-4.78e-11	-5.09e-11	-1.77e-09	-6.18e-12	-1.24e-09	-5.88e-10	-1.59e-09
-0.05853	-3.41e-10	-2.12e-09	-3.81e-10	-1.44e-09	-3.23e-10	-4.63e-11	-4.48e-11	-1.77e-09	-1.85e-11	-1.24e-09	-5.82e-10	-1.59e-09
-0.05812	-3.58e-10	-2.11e-09	-3.94e-10	-1.43e-09	-3.35e-10	-4.63e-11	-8.49e-11	-1.77e-09	-2.01e-11	-1.23e-09	-5.86e-10	-1.57e-09
-0.05794	-3.23e-10	-2.09e-09	-3.84e-10	-1.43e-09	-3.15e-10	-4.48e-11	-7.56e-11	-1.76e-09	-1.85e-11	-1.22e-09	-5.83e-10	-1.56e-09
-0.05756	-3.49e-10	-2.08e-09	-3.78e-10	-1.43e-09	-3.29e-10	-3.86e-11	-6.33e-11	-1.75e-09	-2.01e-11	-1.21e-09	-5.83e-10	-1.55e-09
-0.05725	-3.55e-10	-2.06e-09	-3.87e-10	-1.42e-09	-3.21e-10	-5.25e-11	-6.64e-11	-1.75e-09	-1.7e-11	-1.22e-09	-5.82e-10	-1.53e-09
-0.05694	-3.58e-10	-2.05e-09	-3.95e-10	-1.43e-09	-3.33e-10	-6.48e-11	-6.95e-11	-1.74e-09	-1.23e-11	-1.21e-09	-5.74e-10	-1.51e-09
-0.0565	-3.52e-10	-2.04e-09	-3.87e-10	-1.42e-09	-3.12e-10	-6.17e-11	-8.33e-11	-1.73e-09	-6.19e-12	-1.21e-09	-5.86e-10	-1.5e-09
-0.05622	-3.53e-10	-2.04e-09	-3.83e-10	-1.42e-09	-3.35e-10	-6.33e-11	-6.33e-11	-1.73e-09	-3.24e-11	-1.21e-09	-5.85e-10	-1.48e-09
-0.05597	-3.58e-10	-2.02e-09	-3.86e-10	-1.43e-09	-3.35e-10	-5.25e-11	-5.56e-11	-1.72e-09	-2.62e-11	-1.21e-09	-5.85e-10	-1.47e-09
-0.05562	-3.69e-10	-2.01e-09	-3.81e-10	-1.44e-09	-3.23e-10	-4.48e-11	-4.79e-11	-1.71e-09	-2.01e-11	-1.21e-09	-5.91e-10	-1.47e-09
-0.05534	-3.57e-10	-2.01e-09	-3.97e-10	-1.42e-09	-3.32e-10	-4.63e-11	-6.64e-11	-1.71e-09	-2.31e-11	-1.19e-09	-5.82e-10	-1.46e-09
-0.05499	-3.55e-10	-2.01e-09	-3.94e-10	-1.42e-09	-3.35e-10	-5.55e-11	-6.33e-11	-1.71e-09	-1.85e-11	-1.19e-09	-5.83e-10	-1.45e-09
-0.05465	-3.64e-10	-2.01e-09	-3.95e-10	-1.42e-09	-3.33e-10	-4.01e-11	-5.09e-11	-1.71e-09	-1.54e-11	-1.19e-09	-5.85e-10	-1.44e-09
-0.05427	-3.6e-10	-2e-09	-3.98e-10	-1.42e-09	-3.44e-10	-5.09e-11	-2.47e-11	-1.7e-09	-1.85e-11	-1.18e-09	-5.93e-10	-1.42e-09
-0.05402	-3.6e-10	-1.99e-09	-3.98e-10	-1.42e-09	-3.38e-10	-4.94e-11	-2.47e-11	-1.69e-09	-1.7e-11	-1.19e-09	-5.93e-10	-1.43e-09
-0.05371	-3.6e-10	-1.99e-09	-3.94e-10	-1.43e-09	-3.3e-10	-4.48e-11	-4.94e-11	-1.7e-09	-1.24e-11	-1.17e-09	-5.93e-10	-1.41e-09
-0.0533	-3.63e-10	-1.98e-09	-3.81e-10	-1.42e-09	-3.27e-10	-4.78e-11	-4.32e-11	-1.69e-09	-2.16e-11	-1.16e-09	-5.97e-10	-1.4e-09
-0.05299	-3.55e-10	-1.97e-09	-4.03e-10	-1.41e-09	-3.44e-10	-4.78e-11	-5.56e-11	-1.68e-09	-3.1e-12	-1.15e-09	-5.91e-10	-1.4e-09
-0.05271	-3.58e-10	-1.96e-09	-4.04e-10	-1.42e-09	-3.46e-10	-3.86e-11	-4.63e-11	-1.68e-09	-7.72e-12	-1.16e-09	-5.88e-10	-1.39e-09
-0.05243	-3.66e-10	-1.96e-09	-3.95e-10	-1.41e-09	-3.47e-10	-3.86e-11	-5.25e-11	-1.67e-09	-1.39e-11	-1.13e-09	-5.8e-10	-1.37e-09
-0.05208	-3.52e-10	-1.93e-09	-4.11e-10	-1.42e-09	-3.61e-10	-4.32e-11	-7.87e-11	-1.66e-09	-9.26e-12	-1.12e-09	-5.83e-10	-1.37e-09
-0.05168	-3.4e-10	-1.91e-09	-4.06e-10	-1.41e-09	-3.49e-10	-4.01e-11	-5.87e-11	-1.65e-09	-1.55e-12	-1.12e-09	-5.88e-10	-1.36e-09
-0.05143	-3.49e-10	-1.91e-09	-4.12e-10	-1.4e-09	-3.6e-10	-4.17e-11	-6.48e-11	-1.65e-09	-1.39e-11	-1.13e-09	-5.83e-10	-1.34e-09
-0.05111	-3.52e-10	-1.9e-09	-4.18e-10	-1.41e-09	-3.66e-10	-4.32e-11	-5.09e-11	-1.62e-09	-1.54e-11	-1.12e-09	-5.71e-10	-1.33e-09
-0.05071	-3.47e-10	-1.88e-09	-4.18e-10	-1.41e-09	-3.63e-10	-5.4e-11	-6.64e-11	-1.62e-09	-1.23e-11	-1.12e-09	-5.8e-10	-1.3e-09
-0.05046	-3.61e-10	-1.86e-09	-4.09e-10	-1.41e-09	-3.52e-10	-5.56e-11	-5.71e-11	-1.61e-09	-7.72e-12	-1.11e-09	-5.77e-10	-1.29e-09
-0.05008	-3.49e-10	-1.85e-09	-4.09e-10	-1.41e-09	-3.56e-10	-4.32e-11	-6.48e-11	-1.6e-09	-1.56e-12	-1.11e-09	-5.82e-10	-1.27e-09
-0.0498	-3.55e-10	-1.84e-09	-4.01e-10	-1.4e-09	-3.6e-10	-5.09e-11	-6.79e-11	-1.6e-09	-2.93e-11	-1.11e-09	-5.86e-10	-1.27e-09
-0.04949	-3.53e-10	-1.82e-09	-4.12e-10	-1.41e-09	-3.58e-10	-4.94e-11	-5.25e-11	-1.58e-09	-2.01e-11	-1.1e-09	-5.77e-10	-1.26e-09
-0.04917	-3.56e-10	-1.81e-09	-4.07e-10	-1.41e-09	-3.77e-10	-4.48e-11	-2.78e-11	-1.59e-09	-7.73e-12	-1.09e-09	-5.85e-10	-1.25e-09
-0.04883	-3.58e-10	-1.83e-09	-4.03e-10	-1.4e-09	-3.66e-10	-4.94e-11	-4.63e-11	-1.59e-09	-2.31e-11	-1.1e-09	-5.85e-10	-1.24e-09
-0.04852	-3.61e-10	-1.81e-09	-4.12e-10	-1.41e-09	-3.67e-10	-4.32e-11	-4.32e-11	-1.58e-09	-1.85e-11	-1.1e-09	-5.96e-10	-1.22e-09
-0.04823	-3.6e-10	-1.82e-09	-4.15e-10	-1.39e-09	-3.66e-10	-4.01e-11	-5.25e-11	-1.58e-09	-2.31e-11	-1.08e-09	-5.93e-10	-1.22e-09
-0.04786	-3.6e-10	-1.79e-09	-4.18e-10	-1.4e-09	-3.73e-10	-4.48e-11	-1.08e-11	-1.57e-09	-1.54e-11	-1.07e-09	-5.96e-10	-1.21e-09
-0.04755	-3.77e-10	-1.79e-09	-4.2e-10	-1.4e-09	-3.81e-10	-4.32e-11	-4.63e-11	-1.56e-09	-1.23e-11	-1.06e-09	-5.99e-10	-1.2e-09
-0.04726	-3.66e-10	-1.8e-09	-4.32e-10	-1.4e-09	-3.86e-10	-4.78e-11	-4.32e-11	-1.56e-09	-9.26e-12	-1.06e-09	-5.97e-10	-1.2e-09
-0.04692	-3.6e-10	-1.78e-09	-4.21e-10	-1.4e-09	-3.81e-10	-4.94e-11	-3.7e-11	-1.55e-09	-1.85e-11	-1.04e-09	-5.93e-10	-1.19e-09
-0.04661	-3.57e-10	-1.77e-09	-4.27e-10	-1.39e-09	-3.95e-10	-4.32e-11	-4.32e-11	-1.54e-09	-2.01e-11	-1.03e-09	-5.97e-10	-1.18e-09
-0.04626	-3.69e-10	-1.76e-09	-4.23e-10	-1.39e-09	-3.86e-10	-3.4e-11	-4.78e-11	-1.54e-09	-7.71e-12	-1.03e-09	-5.94e-10	-1.18e-09
-0.04592	-3.66e-10	-1.74e-09	-4.37e-10	-1.38e-09	-3.94e-10	-3.09e-11	-5.71e-11	-1.53e-09	9.25e-12	-1.02e-09	-5.97e-10	-1.17e-09
-0.04557	-3.52e-10	-1.73e-09	-4.32e-10	-1.39e-09	-4.09e-10	-3.7e-11	-4.48e-11	-1.53e-09	0	-1.02e-09	-5.99e-10	-1.16e-09
-0.04529	-3.32e-10	-1.72e-09	-4.11e-10	-1.38e-09	-4.09e-10	-3.24e-11	-5.09e-11	-1.52e-09	-9.26e-12	-1.02e-09	-5.94e-10	-1.14e-09
-0.04495	-3.7e-10	-1.7e-09	-4.38e-10	-1.38e-09	-4.01e-10	-3.86e-11	-4.48e-11	-1.5e-09	-1.54e-11	-1.01e-09	-5.83e-10	-1.13e-09
-0.04467	-3.6e-10	-1.69e-09	-4.31e-10	-1.37e-09	-3.97e-10	-3.24e-11	-4.17e-11	-1.5e-09	-7.72e-12	-1.01e-09	-5.82e-10	-1.11e-09
-0.04438	-3.64e-10	-1.66e-09	-4.21e-10	-1.37e-09	-3.92e-10	-4.32e-11	-5.86e-11	-1.5e-09	-3.41e-15	-1e-09	-5.71e-10	-1.1e-09
-0.04407	-3.61e-10	-1.65e-09	-4.31e-10	-1.35e-09	-3.84e-10	-4.63e-11	-3.71e-11	-1.48e-09	-1.54e-12	-9.94e-10	-5.91e-10	-1.09e-09
-0.0437	-3.63e-10	-1.64e-09	-4.41e-10	-1.35e-09	-3.87e-10	-3.86e-11	-6.79e-11	-1.48e-09	-3.09e-12	-1e-09	-5.96e-10	-1.08e-09
-0.04335	-3.64e-10	-1.64e-09	-4.35e-10	-1.36e-09	-3.95e-10	-4.17e-11	-4.94e-11	-1.47e-09	-4.63e-12	-9.95e-10	-5.9e-10	-1.05e-09
-0.04301	-3.64e-10	-1.62e-09	-4.32e-10	-1.35e-09	-3.9e-10	-4.32e-11	-4.48e-11	-1.46e-09	-4.63e-12	-9.92e-10	-5.85e-10	-1.05e-09
-0.04272	-3.64e-10	-1.62e-09	-4.32e-10	-1.33e-09	-3.92e-10	-4.01e-11	-3.7e-11	-1.45e-09	-6.17e-12	-9.91e-10	-5.91e-10	-1.03e-09
-0.04241	-3.67e-10	-1.61e-09	-4.34e-10	-1.33e-09	-3.95e-10	-4.78e-11	-4.94e-11	-1.44e-09	-9.26e-12	-9.85e-10	-6e-10	-1.03e-09
-0.04213	-3.73e-10	-1.61e-09	-4.27e-10	-1.34e-09	-4.11e-10	-3.86e-11	-4.48e-11	-1.45e-09	-1.7e-11	-9.75e-10	-6.05e-10	-1.01e-09
-0.04172	-3.64e-10	-1.61e-09	-4.46e-10	-1.34e-09	-4.07e-10	-3.86e-11	-4.48e-11	-1.44e-09	-1.7e-11	-9.74e-10	-6.07e-10	-1.01e-09
-0.04147	-3.73e-10	-1.6e-09	-4.32e-10	-1.33e-09	-4.17e-10	-4.78e-11	-4.78e-11	-1.43e-09	-9.26e-12	-9.63e-10	-6.07e-10	-1e-09
-0.04113	-3.77e-10	-1.59e-09	-4.44e-10	-1.33e-09	-4.11e-10	-3.86e-11	-3.24e-11	-1.42e-09	-9.25e-12	-9.63e-10	-6.11e-10	-1e-09
-0.04075	-3.67e-10	-1.59e-09	-4.48e-10	-1.33e-09	-4.06e-10	-3.7e-11	-3.7e-11	-1.42e-09	9.24e-12	-9.54e-10	-6.02e-10	-9.89e-10
-0.0405	-3.64e-10	-1.57e-09	-4.37e-10	-1.33e-09	-4.07e-10	-3.7e-11	-2.78e-11	-1.41e-09	-1.54e-11	-9.49e-10	-6.03e-10	-9.74e-10
-0.04013	-3.72e-10	-1.56e-09	-4.49e-10	-1.32e-09	-4.18e-10	-3.55e-11	-4.01e-11	-1.4e-09	-1.54e-12	-9.35e-10	-5.99e-10	-9.63e-10
-0.03981	-3.8e-10	-1.55e-09	-4.41e-10	-1.31e-09	-4.27e-10	-2.78e-11	-4.63e-11	-1.39e-09	1.39e-11	-9.37e-10	-5.97e-10	-9.61e-10
-0.0395	-3.7e-10	-1.53e-09	-4.48e-10	-1.32e-09	-4.2e-10	-2.78e-11	-5.09e-11	-1.38e-09	6.17e-12	-9.2e-10	-5.96e-10	-9.52e-10
-0.03913	-3.64e-10	-1.51e-09	-4.48e-10	-1.31e-09	-4.27e-10	-3.39e-11	-4.32e-11	-1.37e-09	-1.54e-12	-9.09e-10	-5.83e-10	-9.38e-10
-0.03888	-3.69e-10	-1.51e-09	-4.32e-10	-1.3e-09	-4.29e-10	-2.16e-11	-3.86e-11	-1.36e-09	-1.54e-12	-9.12e-10	-5.9e-10	-9.28e-10
-0.03856	-3.57e-10	-1.49e-09	-4.32e-10	-1.29e-09	-4.35e-10	-2.62e-11	-4.01e-11	-1.35e-09	6.17e-12	-9.09e-10	-5.82e-10	-9.12e-10
-0.03819	-3.58e-10	-1.46e-09	-4.49e-10	-1.28e-09	-4.4e-10	-3.24e-11	-5.4e-11	-1.34e-09	-7.71e-12	-8.98e-10	-5.79e-10	-9.04e-10
-0.0379	-3.58e-10	-1.47e-09	-4.38e-10	-1.28e-09	-4.31e-10	-3.24e-11	-4.63e-11	-1.33e-09	-3.41e-15	-8.95e-10	-5.8e-10	-8.9e-10
-0.03753	-3.6e-10	-1.44e-09	-4.44e-10	-1.27e-09	-4.26e-10	-4.63e-11	-4.48e-11	-1.32e-09	-1.54e-12	-8.9e-10	-5.8e-10	-8.75e-10
-0.03725	-3.67e-10	-1.43e-09	-4.4e-10	-1.26e-09	-4.32e-10	-4.63e-11	-5.56e-11	-1.31e-09	1.54e-12	-8.9e-10	-5.79e-10	-8.57e-10
-0.03693	-3.61e-10	-1.41e-09	-4.46e-10	-1.25e-09	-4.21e-10	-4.01e-11	-5.56e-11	-1.31e-09	-4.63e-12	-8.89e-10	-5.9e-10	-8.5e-10
-0.03659	-3.64e-10	-1.42e-09	-4.52e-10	-1.26e-09	-4.38e-10	-3.86e-11	-4.17e-11	-1.3e-09	-1.54e-12	-8.84e-10	-5.86e-10	-8.44e-10
-0.03625	-3.63e-10	-1.4e-09	-4.48e-10	-1.27e-09	-4.34e-10	-3.7e-11	-2.93e-11	-1.29e-09	-1.54e-12	-8.81e-10	-5.77e-10	-8.24e-10
-0.036	-3.77e-10	-1.39e-09	-4.55e-10	-1.25e-09	-4.32e-10	-3.86e-11	-3.24e-11	-1.29e-09	-4.63e-12	-8.77e-10	-5.82e-10	-8.21e-10
-0.03562	-3.7e-10	-1.38e-09	-4.43e-10	-1.24e-09	-4.4e-10	-3.55e-11	-4.94e-11	-1.28e-09	-1.54e-12	-8.7e-10	-5.94e-10	-8.12e-10
-0.03534	-3.75e-10	-1.37e-09	-4.4e-10	-1.25e-09	-4.41e-10	-4.63e-11	-2.62e-11	-1.27e-09	1.54e-12	-8.67e-10	-6.05e-10	-7.99e-10
-0.03496	-3.78e-10	-1.36e-09	-4.43e-10	-1.24e-09	-4.32e-10	-3.7e-11	-3.24e-11	-1.26e-09	-4.62e-12	-8.49e-10	-6.03e-10	-7.99e-10
-0.03465	-3.66e-10	-1.37e-09	-4.51e-10	-1.23e-09	-4.29e-10	-4.01e-11	-4.01e-11	-1.26e-09	3.08e-12	-8.43e-10	-6e-10	-7.86e-10
-0.03431	-3.7e-10	-1.36e-09	-4.52e-10	-1.23e-09	-4.29e-10	-3.7e-11	-3.09e-11	-1.24e-09	1.14e-15	-8.4e-10	-6.11e-10	-7.78e-10
-0.03399	-3.67e-10	-1.34e-09	-4.66e-10	-1.23e-09	-4.18e-10	-4.17e-11	-2.16e-11	-1.23e-09	3.41e-15	-8.38e-10	-6.02e-10	-7.73e-10
-0.03368	-3.64e-10	-1.33e-09	-4.51e-10	-1.21e-09	-4.31e-10	-3.4e-11	-3.86e-11	-1.22e-09	9.25e-12	-8.26e-10	-6.02e-10	-7.69e-10
-0.03343	-3.72e-10	-1.33e-09	-4.54e-10	-1.21e-09	-4.4e-10	-2.01e-11	-3.55e-11	-1.22e-09	5.69e-15	-8.26e-10	-5.94e-10	-7.52e-10
-0.03302	-3.67e-10	-1.31e-09	-4.43e-10	-1.2e-09	-4.34e-10	-1.7e-11	-4.01e-11	-1.21e-09	6.17e-12	-8.06e-10	-6.03e-10	-7.41e-10
-0.03274	-3.64e-10	-1.29e-09	-4.48e-10	-1.2e-09	-4.63e-10	-2.47e-11	-4.63e-11	-1.19e-09	7.72e-12	-8.09e-10	-6.02e-10	-7.32e-10
-0.03243	-3.46e-10	-1.28e-09	-4.51e-10	-1.18e-09	-4.55e-10	-2.32e-11	-6.17e-11	-1.19e-09	2.01e-11	-7.87e-10	-5.91e-10	-7.19e-10
-0.03208	-3.69e-10	-1.26e-09	-4.44e-10	-1.17e-09	-4.57e-10	-2.62e-11	-3.71e-11	-1.18e-09	1.08e-14	-7.82e-10	-5.9e-10	-7.15e-10
-0.03177	-3.61e-10	-1.24e-09	-4.48e-10	-1.17e-09	-4.63e-10	-2.47e-11	-4.94e-11	-1.17e-09	9.25e-12	-7.81e-10	-5.85e-10	-7.01e-10
-0.03146	-3.64e-10	-1.22e-09	-4.44e-10	-1.16e-09	-4.65e-10	-2.93e-11	-4.47e-11	-1.16e-09	-1.54e-12	-7.87e-10	-5.93e-10	-6.84e-10
-0.03111	-3.67e-10	-1.21e-09	-4.49e-10	-1.16e-09	-4.57e-10	-3.55e-11	-2.16e-11	-1.14e-09	6.17e-12	-7.84e-10	-5.88e-10	-6.73e-10
-0.03077	-3.66e-10	-1.19e-09	-4.52e-10	-1.15e-09	-4.55e-10	-3.86e-11	-4.47e-11	-1.14e-09	1.23e-11	-7.84e-10	-5.74e-10	-6.54e-10
-0.03049	-3.6e-10	-1.18e-09	-4.57e-10	-1.13e-09	-4.57e-10	-3.86e-11	-4.17e-11	-1.13e-09	3.98e-15	-7.84e-10	-5.74e-10	-6.53e-10
-0.03014	-3.58e-10	-1.18e-09	-4.52e-10	-1.14e-09	-4.55e-10	-1.85e-11	-2.93e-11	-1.12e-09	-1.54e-12	-7.67e-10	-5.71e-10	-6.36e-10
-0.02986	-3.63e-10	-1.16e-09	-4.61e-10	-1.13e-09	-4.66e-10	-2.47e-11	-3.4e-11	-1.11e-09	1.54e-12	-7.75e-10	-5.86e-10	-6.28e-10
-0.02958	-3.66e-10	-1.16e-09	-4.49e-10	-1.12e-09	-4.57e-10	-2.93e-11	-3.55e-11	-1.11e-09	3.09e-12	-7.69e-10	-5.74e-10	-6.16e-10
-0.0292	-3.69e-10	-1.14e-09	-4.55e-10	-1.11e-09	-4.6e-10	-2.32e-11	4.6e-12	-1.1e-09	7.71e-12	-7.56e-10	-5.71e-10	-6.1e-10
-0.02886	-3.67e-10	-1.15e-09	-4.54e-10	-1.11e-09	-4.61e-10	-3.39e-11	-3.86e-11	-1.08e-09	6.17e-12	-7.48e-10	-5.94e-10	-5.99e-10
-0.02855	-3.72e-10	-1.13e-09	-4.48e-10	-1.1e-09	-4.58e-10	-2.78e-11	-3.24e-11	-1.08e-09	-4.62e-12	-7.52e-10	-5.85e-10	-5.88e-10
-0.02817	-3.66e-10	-1.12e-09	-4.54e-10	-1.1e-09	-4.61e-10	-3.55e-11	-3.39e-11	-1.07e-09	1.54e-12	-7.39e-10	-5.82e-10	-5.9e-10
-0.02792	-3.55e-10	-1.12e-09	-4.49e-10	-1.1e-09	-4.54e-10	-2.93e-11	-2.32e-11	-1.06e-09	6.17e-12	-7.24e-10	-5.83e-10	-5.77e-10
-0.02761	-3.61e-10	-1.11e-09	-4.55e-10	-1.08e-09	-4.58e-10	-2.32e-11	-2.01e-11	-1.05e-09	-3.08e-12	-7.15e-10	-5.8e-10	-5.79e-10
-0.02723	-3.46e-10	-1.08e-09	-4.72e-10	-1.06e-09	-4.65e-10	-2.47e-11	-2.93e-11	-1.04e-09	-7.71e-12	-7.02e-10	-5.77e-10	-5.76e-10
-0.02692	-3.61e-10	-1.07e-09	-4.48e-10	-1.06e-09	-4.49e-10	-1.85e-11	-3.4e-11	-1.04e-09	7.71e-12	-7.05e-10	-5.85e-10	-5.57e-10
-0.02664	-3.55e-10	-1.07e-09	-4.55e-10	-1.05e-09	-4.68e-10	-2.16e-11	-4.32e-11	-1.03e-09	9.26e-12	-6.9e-10	-5.8e-10	-5.45e-10
-0.02623	-3.38e-10	-1.04e-09	-4.48e-10	-1.05e-09	-4.68e-10	-2.62e-11	-2.93e-11	-1.01e-09	1.23e-11	-6.81e-10	-5.8e-10	-5.32e-10
-0.02598	-3.36e-10	-1.03e-09	-4.57e-10	-1.04e-09	-4.8e-10	-2.01e-11	-2.62e-11	-1e-09	7.72e-12	-6.84e-10	-5.63e-10	-5.19e-10
-0.02567	-3.38e-10	-1.02e-09	-4.52e-10	-1.02e-09	-4.72e-10	-2.01e-11	-3.4e-11	-9.86e-10	6.26e-15	-6.78e-10	-5.63e-10	-5.11e-10
-0.02532	-3.33e-10	-9.94e-10	-4.46e-10	-1.02e-09	-4.83e-10	-1.85e-11	-4.63e-11	-9.8e-10	9.26e-12	-6.67e-10	-5.63e-10	-4.97e-10
-0.02498	-3.35e-10	-9.78e-10	-4.34e-10	-1e-09	-4.78e-10	-2.78e-11	-2.47e-11	-9.63e-10	7.72e-12	-6.7e-10	-5.66e-10	-4.86e-10
-0.02473	-3.36e-10	-9.61e-10	-4.44e-10	-9.95e-10	-4.69e-10	-1.7e-11	-1.85e-11	-9.55e-10	1.39e-11	-6.61e-10	-5.65e-10	-4.69e-10
-0.02435	-3.44e-10	-9.38e-10	-4.41e-10	-9.97e-10	-4.69e-10	-2.62e-11	-4.17e-11	-9.48e-10	1.39e-11	-6.61e-10	-5.63e-10	-4.44e-10
-0.02401	-3.3e-10	-9.29e-10	-4.44e-10	-9.85e-10	-4.68e-10	-3.24e-11	-3.7e-11	-9.2e-10	-3.08e-12	-6.53e-10	-5.62e-10	-4.38e-10
-0.02373	-3.23e-10	-9.24e-10	-4.46e-10	-9.63e-10	-4.65e-10	-2.78e-11	-2.78e-11	-9.21e-10	3.09e-12	-6.54e-10	-5.6e-10	-4.32e-10
-0.02332	-3.55e-10	-9.23e-10	-4.35e-10	-9.61e-10	-4.71e-10	-3.24e-11	1.08e-11	-9.09e-10	6.17e-12	-6.53e-10	-5.56e-10	-4.24e-10
-0.02304	-3.33e-10	-9.03e-10	-4.34e-10	-9.52e-10	-4.69e-10	-2.47e-11	-2.16e-11	-8.94e-10	3.09e-12	-6.53e-10	-5.59e-10	-4.15e-10
-0.02276	-3.23e-10	-8.98e-10	-4.38e-10	-9.4e-10	-4.66e-10	-2.47e-11	-1.55e-12	-9.04e-10	4.63e-12	-6.47e-10	-5.62e-10	-4.09e-10
-0.02238	-3.29e-10	-8.84e-10	-4.32e-10	-9.35e-10	-4.71e-10	-2.78e-11	-1.08e-11	-8.94e-10	1.7e-11	-6.36e-10	-5.65e-10	-4.01e-10
-0.02213	-3.32e-10	-8.81e-10	-4.29e-10	-9.24e-10	-4.6e-10	-1.7e-11	-1.39e-11	-8.84e-10	4.63e-12	-6.2e-10	-5.66e-10	-3.92e-10
-0.02179	-3.23e-10	-8.7e-10	-4.4e-10	-9.21e-10	-4.57e-10	-2.62e-11	-1.08e-11	-8.67e-10	1.55e-12	-6.25e-10	-5.6e-10	-3.87e-10
-0.02147	-3.12e-10	-8.64e-10	-4.46e-10	-9.15e-10	-4.58e-10	-2.78e-11	-1.39e-11	-8.64e-10	1.08e-11	-6.2e-10	-5.56e-10	-3.73e-10
-0.02113	-3.38e-10	-8.41e-10	-4.37e-10	-8.94e-10	-4.57e-10	-2.31e-11	-7.72e-12	-8.52e-10	1.08e-11	-6e-10	-5.52e-10	-3.66e-10
-0.02085	-3.15e-10	-8.38e-10	-4.4e-10	-8.84e-10	-4.63e-10	-2.01e-11	-4.64e-12	-8.35e-10	3.55e-11	-5.85e-10	-5.49e-10	-3.61e-10
-0.02047	-3.16e-10	-8.24e-10	-4.32e-10	-8.83e-10	-4.65e-10	-1.23e-11	-1.85e-11	-8.32e-10	2.93e-11	-5.82e-10	-5.59e-10	-3.53e-10
-0.02022	-3.16e-10	-8.09e-10	-4.29e-10	-8.72e-10	-4.57e-10	-1.08e-11	-2.01e-11	-8.24e-10	1.24e-11	-5.69e-10	-5.43e-10	-3.46e-10
-0.01984	-3.19e-10	-7.92e-10	-4.18e-10	-8.63e-10	-4.92e-10	-1.08e-11	-7.72e-12	-8.06e-10	9.26e-12	-5.65e-10	-5.39e-10	-3.35e-10
-0.01944	-3.1e-10	-7.61e-10	-4.21e-10	-8.38e-10	-4.83e-10	-6.18e-12	-1.7e-11	-7.95e-10	1.85e-11	-5.57e-10	-5.34e-10	-3.19e-10
-0.01916	-3.02e-10	-7.35e-10	-4.12e-10	-8.35e-10	-4.72e-10	-1.23e-11	-2.01e-11	-7.84e-10	9.26e-12	-5.51e-10	-5.31e-10	-3.12e-10
-0.01887	-3.02e-10	-7.3e-10	-4.21e-10	-8.16e-10	-4.78e-10	-9.26e-12	-2.01e-11	-7.56e-10	1.39e-11	-5.6e-10	-5.32e-10	-2.92e-10
-0.01853	-3.01e-10	-7.15e-10	-4.21e-10	-8.03e-10	-4.72e-10	-1.54e-11	-2.01e-11	-7.55e-10	1.23e-11	-5.51e-10	-5.28e-10	-2.86e-10
-0.01828	-3.02e-10	-6.91e-10	-4.17e-10	-7.99e-10	-4.61e-10	-2.01e-11	-2.16e-11	-7.39e-10	1.23e-11	-5.42e-10	-5.15e-10	-2.69e-10
-0.01787	-2.93e-10	-6.84e-10	-4.01e-10	-7.95e-10	-4.65e-10	-1.7e-11	-2.16e-11	-7.25e-10	1.7e-11	-5.45e-10	-5.14e-10	-2.69e-10
-0.01753	-2.9e-10	-6.73e-10	-4.04e-10	-7.72e-10	-4.57e-10	-1.54e-11	-2.31e-11	-7.24e-10	2.16e-11	-5.42e-10	-5.09e-10	-2.45e-10
-0.01728	-2.89e-10	-6.51e-10	-4.01e-10	-7.55e-10	-4.54e-10	-7.72e-12	-6.18e-12	-7.05e-10	1.7e-11	-5.26e-10	-5.02e-10	-2.38e-10
-0.01696	-2.84e-10	-6.45e-10	-3.95e-10	-7.64e-10	-4.43e-10	-2.31e-11	1.54e-12	-6.98e-10	1.23e-11	-5.32e-10	-4.97e-10	-2.22e-10
-0.01659	-2.81e-10	-6.37e-10	-3.95e-10	-7.47e-10	-4.51e-10	-2.62e-11	-1.54e-12	-6.81e-10	9.26e-12	-5.17e-10	-5.05e-10	-2.15e-10
-0.01628	-2.73e-10	-6.33e-10	-3.94e-10	-7.33e-10	-4.35e-10	-1.54e-11	9.25e-12	-6.65e-10	1.08e-11	-5.11e-10	-5.03e-10	-2.11e-10
-0.01599	-2.87e-10	-6.23e-10	-3.9e-10	-7.32e-10	-4.31e-10	-1.39e-11	-1.53e-12	-6.61e-10	1.23e-11	-5.08e-10	-4.97e-10	-2.04e-10
-0.01562	-2.86e-10	-6.14e-10	-3.94e-10	-7.1e-10	-4.32e-10	-2.16e-11	1.7e-11	-6.62e-10	1.39e-11	-5.08e-10	-4.92e-10	-1.88e-10
-0.0154	-2.84e-10	-6e-10	-3.98e-10	-6.96e-10	-4.11e-10	-2.78e-11	-1.54e-11	-6.42e-10	1.54e-11	-5e-10	-4.95e-10	-1.84e-10
-0.01506	-2.76e-10	-6.03e-10	-3.9e-10	-6.88e-10	-4.2e-10	-1.7e-11	-1.08e-11	-6.42e-10	9.27e-12	-4.85e-10	-4.85e-10	-1.76e-10
-0.01477	-2.89e-10	-5.86e-10	-3.89e-10	-6.84e-10	-4.17e-10	-1.39e-11	9.24e-12	-6.22e-10	2.01e-11	-4.78e-10	-4.94e-10	-1.79e-10
-0.01443	-2.81e-10	-5.63e-10	-3.95e-10	-6.62e-10	-4.2e-10	-1.7e-11	-1.08e-11	-6.16e-10	1.39e-11	-4.68e-10	-4.95e-10	-1.64e-10
-0.01405	-2.75e-10	-5.54e-10	-3.84e-10	-6.54e-10	-4.26e-10	-3.09e-12	-1.55e-12	-6.03e-10	2.93e-11	-4.58e-10	-4.86e-10	-1.56e-10
-0.0138	-2.65e-10	-5.36e-10	-3.73e-10	-6.42e-10	-4.29e-10	-3.08e-12	-3.09e-12	-5.96e-10	2.16e-11	-4.46e-10	-4.78e-10	-1.51e-10
-0.01349	-2.48e-10	-5.17e-10	-3.78e-10	-6.27e-10	-4.37e-10	6.17e-12	-9.26e-12	-5.76e-10	2.62e-11	-4.4e-10	-4.72e-10	-1.4e-10
-0.01305	-2.7e-10	-4.98e-10	-3.81e-10	-6.11e-10	-4.21e-10	2.27e-15	-9.26e-12	-5.65e-10	2.62e-11	-4.32e-10	-4.61e-10	-1.33e-10
-0.01277	-2.48e-10	-4.72e-10	-3.63e-10	-6.02e-10	-4.24e-10	-2.84e-15	-1.7e-11	-5.42e-10	2.62e-11	-4.21e-10	-4.51e-10	-1.16e-10
-0.01246	-2.5e-10	-4.66e-10	-3.73e-10	-5.9e-10	-4.35e-10	-7.71e-12	-1.36e-14	-5.4e-10	2.62e-11	-4.24e-10	-4.46e-10	-9.57e-11
-0.01218	-2.48e-10	-4.4e-10	-3.6e-10	-5.69e-10	-4.29e-10	-9.26e-12	-2e-11	-5.17e-10	2.62e-11	-4.09e-10	-4.41e-10	-9.41e-11
-0.0118	-2.5e-10	-4.14e-10	-3.5e-10	-5.65e-10	-4.21e-10	-1.08e-11	-4.64e-12	-5.02e-10	2.01e-11	-4.12e-10	-4.34e-10	-8.02e-11
-0.01142	-2.32e-10	-4.03e-10	-3.49e-10	-5.39e-10	-4.09e-10	-1.08e-11	-2.01e-11	-4.91e-10	2.47e-11	-4.15e-10	-4.26e-10	-6.33e-11
-0.01114	-2.35e-10	-3.81e-10	-3.4e-10	-5.31e-10	-4.03e-10	-1.85e-11	-7.72e-12	-4.91e-10	2.16e-11	-4.12e-10	-4.15e-10	-4.94e-11
-0.01089	-2.31e-10	-3.7e-10	-3.32e-10	-5.2e-10	-3.95e-10	-1.08e-14	-7.71e-12	-4.77e-10	1.54e-11	-4.07e-10	-4.15e-10	-3.7e-11
-0.01055	-2.18e-10	-3.58e-10	-3.35e-10	-5.14e-10	-3.89e-10	-1.08e-11	1.54e-12	-4.55e-10	2.62e-11	-4.06e-10	-4.12e-10	-1.54e-11
-0.01017	-2.31e-10	-3.4e-10	-3.26e-10	-4.92e-10	-3.87e-10	-3.09e-12	-3.08e-12	-4.49e-10	6.18e-12	-3.92e-10	-4.09e-10	-2.16e-11
-0.00989	-2.42e-10	-3.64e-10	-3.27e-10	-4.86e-10	-3.81e-10	-7.71e-12	7.71e-12	-4.4e-10	1.39e-11	-3.87e-10	-4.12e-10	-1.23e-11
-0.00961	-2.11e-10	-3.41e-10	-3.19e-10	-4.74e-10	-3.77e-10	-6.17e-12	-1.54e-12	-4.26e-10	2.16e-11	-3.81e-10	-4.06e-10	-2.27e-15
-0.00923	-2.24e-10	-3.32e-10	-3.18e-10	-4.58e-10	-3.58e-10	-6.17e-12	-6.17e-12	-4.2e-10	1.24e-11	-3.73e-10	-4.12e-10	6.17e-12
-0.00889	-2.13e-10	-3.16e-10	-3.18e-10	-4.37e-10	-3.53e-10	-4.63e-12	3.09e-12	-4.06e-10	1.85e-11	-3.66e-10	-4.06e-10	9.26e-12
-0.00861	-2.01e-10	-3.15e-10	-3.1e-10	-4.21e-10	-3.52e-10	-1.71e-15	1.08e-11	-3.89e-10	2.31e-11	-3.49e-10	-3.84e-10	1.39e-11
-0.0082	-2.15e-10	-2.96e-10	-3.02e-10	-4.2e-10	-3.52e-10	1.71e-15	2.16e-11	-3.9e-10	1.54e-11	-3.41e-10	-3.94e-10	2.62e-11
-0.00795	-2.07e-10	-2.89e-10	-3.02e-10	-4.01e-10	-3.36e-10	4.63e-12	9.26e-12	-3.69e-10	2.62e-11	-3.36e-10	-3.83e-10	2.78e-11
-0.00767	-1.99e-10	-2.53e-10	-2.99e-10	-3.97e-10	-3.33e-10	9.26e-12	9.26e-12	-3.52e-10	1.7e-11	-3.24e-10	-3.84e-10	4.01e-11
-0.00732	-2.01e-10	-2.52e-10	-2.9e-10	-3.78e-10	-3.13e-10	4.63e-12	1.23e-11	-3.4e-10	4.32e-11	-3.16e-10	-3.6e-10	4.63e-11
-0.00701	-1.88e-10	-2.27e-10	-2.84e-10	-3.57e-10	-3.33e-10	1.08e-11	6.17e-12	-3.19e-10	3.24e-11	-3.04e-10	-3.61e-10	4.94e-11
-0.00667	-1.56e-10	-2.08e-10	-2.72e-10	-3.43e-10	-3.26e-10	4.63e-12	4.62e-12	-3.15e-10	2.47e-11	-3.06e-10	-3.52e-10	6.79e-11
-0.00639	-1.67e-10	-1.76e-10	-2.7e-10	-3.27e-10	-3.32e-10	9.26e-12	-2e-11	-3.06e-10	2.32e-11	-2.92e-10	-3.36e-10	8.18e-11
-0.00601	-1.68e-10	-1.7e-10	-2.55e-10	-3.18e-10	-3.27e-10	1.23e-11	7.7e-12	-2.79e-10	2.47e-11	-2.79e-10	-3.3e-10	1e-10
-0.0057	-1.67e-10	-1.47e-10	-2.52e-10	-2.96e-10	-3.18e-10	-6.16e-12	1.55e-12	-2.67e-10	2.31e-11	-2.82e-10	-3.16e-10	1.05e-10
-0.00541	-1.67e-10	-1.2e-10	-2.38e-10	-2.82e-10	-3.06e-10	-1.54e-12	1.23e-11	-2.55e-10	1.85e-11	-2.7e-10	-2.98e-10	1.2e-10
-0.00504	-1.54e-10	-1.13e-10	-2.3e-10	-2.59e-10	-2.89e-10	-1.14e-15	-1.08e-11	-2.41e-10	3.55e-11	-2.73e-10	-2.92e-10	1.33e-10
-0.00479	-1.36e-10	-8.64e-11	-2.25e-10	-2.58e-10	-3.01e-10	-1.54e-12	4.63e-12	-2.24e-10	3.24e-11	-2.69e-10	-2.81e-10	1.45e-10
-0.00441	-1.36e-10	-9.1e-11	-2.16e-10	-2.33e-10	-2.81e-10	3.09e-12	1.08e-11	-2.15e-10	2.47e-11	-2.62e-10	-2.78e-10	1.54e-10
-0.00407	-1.33e-10	-7.41e-11	-2.13e-10	-2.16e-10	-2.56e-10	1.23e-11	1.08e-11	-2.07e-10	2.62e-11	-2.62e-10	-2.72e-10	1.67e-10
-0.00376	-1.4e-10	-5.25e-11	-2.08e-10	-1.94e-10	-2.61e-10	-1.53e-12	2.31e-11	-1.81e-10	2.01e-11	-2.53e-10	-2.62e-10	1.76e-10
-0.00344	-1.28e-10	-5.86e-11	-2.01e-10	-1.96e-10	-2.39e-10	1.54e-11	1.08e-11	-1.84e-10	2.16e-11	-2.59e-10	-2.58e-10	1.76e-10
-0.00307	-1.56e-10	-5.4e-11	-1.91e-10	-1.81e-10	-2.42e-10	1.85e-11	3.24e-11	-1.67e-10	2.78e-11	-2.53e-10	-2.64e-10	1.84e-10
-0.00279	-1.37e-10	-3.24e-11	-1.88e-10	-1.64e-10	-2.24e-10	1.23e-11	3.39e-11	-1.65e-10	2.01e-11	-2.45e-10	-2.47e-10	1.96e-10
-0.00241	-1.19e-10	-2.32e-11	-1.81e-10	-1.5e-10	-2.13e-10	-1.53e-12	1.54e-11	-1.4e-10	2.31e-11	-2.25e-10	-2.53e-10	2.04e-10
-0.00213	-1.13e-10	-1.85e-11	-1.61e-10	-1.36e-10	-2.05e-10	9.26e-12	2.32e-11	-1.34e-10	2.78e-11	-2.13e-10	-2.47e-10	2.07e-10
-0.00182	-1.14e-10	7.71e-12	-1.73e-10	-1.05e-10	-1.9e-10	1.23e-11	4.01e-11	-1.2e-10	2.47e-11	-2.1e-10	-2.36e-10	2.13e-10
-0.0015	-1.03e-10	2.31e-11	-1.62e-10	-9.57e-11	-1.77e-10	1.54e-11	2.62e-11	-1e-10	2.78e-11	-1.93e-10	-2.15e-10	2.16e-10
-0.00119	-8.49e-11	3.4e-11	-1.59e-10	-8.18e-11	-1.77e-10	2.31e-11	1.85e-11	-9.41e-11	2.93e-11	-1.82e-10	-2.11e-10	2.27e-10
-0.000876	-9.57e-11	5.56e-11	-1.57e-10	-6.02e-11	-1.67e-10	2.32e-11	2.01e-11	-7.25e-11	3.09e-11	-1.74e-10	-1.99e-10	2.33e-10
-0.000501	-8.8e-11	6.48e-11	-1.45e-10	-4.17e-11	-1.67e-10	2.62e-11	1.08e-11	-6.64e-11	3.7e-11	-1.61e-10	-1.79e-10	2.41e-10
-0.000188	-8.33e-11	1.13e-10	-1.27e-10	-3.55e-11	-1.65e-10	2.93e-11	3.08e-11	-4.78e-11	2.93e-11	-1.51e-10	-1.7e-10	2.65e-10
0.000125	-6.64e-11	1.1e-10	-1.19e-10	-2.01e-11	-1.56e-10	3.09e-11	-1.08e-11	-3.39e-11	3.86e-11	-1.4e-10	-1.56e-10	2.7e-10
0.000376	-6.64e-11	1.45e-10	-1.08e-10	7.71e-12	-1.48e-10	3.39e-11	2.93e-11	-1.23e-11	3.4e-11	-1.39e-10	-1.33e-10	2.84e-10
0.00072	-5.56e-11	1.59e-10	-8.49e-11	2.78e-11	-1.22e-10	2.78e-11	2.93e-11	3.09e-12	3.7e-11	-1.33e-10	-1.22e-10	2.99e-10
0.00097	-5.55e-11	1.73e-10	-8.02e-11	5.25e-11	-1.19e-10	2.47e-11	2.78e-11	1.85e-11	2.62e-11	-1.31e-10	-1.05e-10	3.04e-10
0.00135	-2.47e-11	2.05e-10	-7.25e-11	5.71e-11	-1e-10	1.54e-11	1.08e-11	3.55e-11	2.47e-11	-1.31e-10	-8.8e-11	3.13e-10
0.00172	-2.16e-11	2.24e-10	-5.71e-11	8.33e-11	-8.95e-11	2.16e-11	2.93e-11	5.4e-11	3.24e-11	-1.23e-10	-7.56e-11	3.27e-10
0.00203	-1.85e-11	2.31e-10	-4.63e-11	8.95e-11	-8.95e-11	2.78e-11	3.09e-11	5.71e-11	3.09e-11	-1.19e-10	-7.41e-11	3.38e-10
0.00235	-7.73e-12	2.47e-10	-3.55e-11	1.1e-10	-7.1e-11	3.24e-11	4.32e-11	6.79e-11	2.93e-11	-1.19e-10	-5.56e-11	3.52e-10
0.00272	-2.78e-11	2.47e-10	-2.47e-11	1.3e-10	-6.64e-11	3.24e-11	3.09e-11	8.8e-11	2.62e-11	-9.88e-11	-5.71e-11	3.55e-10
0.00294	3.07e-12	2.58e-10	-2.01e-11	1.48e-10	-5.09e-11	2.93e-11	3.86e-11	8.95e-11	3.39e-11	-1e-10	-4.17e-11	3.69e-10
0.00329	-2.16e-11	2.72e-10	-1.23e-11	1.59e-10	-1.54e-11	3.55e-11	4.47e-11	1.2e-10	2.32e-11	-1.03e-10	-3.55e-11	3.72e-10
0.00363	-3.41e-15	2.76e-10	6.17e-12	1.79e-10	-9.25e-12	3.55e-11	2.93e-11	1.17e-10	3.09e-11	-9.26e-11	-1.54e-11	3.8e-10
0.00398	1.23e-11	2.89e-10	9.26e-12	1.98e-10	2.62e-11	4.01e-11	3.86e-11	1.28e-10	3.09e-11	-7.41e-11	-2.31e-11	3.77e-10
0.00423	1.7e-11	2.98e-10	9.26e-12	2.13e-10	3.7e-11	3.86e-11	4.78e-11	1.5e-10	2.62e-11	-6.33e-11	-1.08e-11	3.94e-10
0.00457	2.62e-11	3.06e-10	1.85e-11	2.33e-10	6.33e-11	3.55e-11	4.94e-11	1.61e-10	3.86e-11	-6.02e-11	0	3.95e-10
0.00491	3.55e-11	3.32e-10	2.47e-11	2.5e-10	5.25e-11	3.86e-11	4.63e-11	1.79e-10	3.55e-11	-4.48e-11	1.08e-11	4e-10
0.00523	4.63e-11	3.52e-10	3.09e-11	2.65e-10	6.33e-11	3.86e-11	4.63e-11	1.94e-10	3.55e-11	-3.55e-11	3.09e-11	4.12e-10
0.00551	5.86e-11	3.72e-10	5.4e-11	2.93e-10	8.33e-11	5.71e-11	4.94e-11	2.07e-10	3.4e-11	-1.7e-11	3.7e-11	4.27e-10
0.00592	6.64e-11	4.03e-10	5.56e-11	3.01e-10	7.25e-11	5.71e-11	4.48e-11	2.27e-10	4.17e-11	-6.18e-12	6.64e-11	4.4e-10
0.0062	6.94e-11	4.2e-10	7.56e-11	3.26e-10	9.26e-11	5.71e-11	4.32e-11	2.44e-10	4.01e-11	-3.08e-12	8.33e-11	4.37e-10
0.00651	7.56e-11	4.38e-10	9.11e-11	3.52e-10	1.06e-10	5.56e-11	4.63e-11	2.59e-10	3.55e-11	1.23e-11	1.06e-10	4.54e-10
0.00685	9.57e-11	4.55e-10	1.17e-10	3.57e-10	1.16e-10	5.71e-11	2.63e-11	2.82e-10	3.7e-11	1.85e-11	1.17e-10	4.68e-10
0.00714	1.02e-10	4.86e-10	1.23e-10	3.89e-10	1.23e-10	5.09e-11	4.63e-11	2.92e-10	3.4e-11	2.01e-11	1.47e-10	4.74e-10
0.00751	1.17e-10	5.08e-10	1.3e-10	4.18e-10	1.48e-10	5.25e-11	4.63e-11	3.12e-10	3.86e-11	3.09e-11	1.65e-10	4.94e-10
0.00783	1.2e-10	5.26e-10	1.56e-10	4.21e-10	1.61e-10	4.78e-11	4.01e-11	3.23e-10	4.01e-11	3.09e-11	1.9e-10	4.97e-10
0.0082	1.28e-10	5.45e-10	1.74e-10	4.44e-10	1.9e-10	4.94e-11	4.01e-11	3.46e-10	2.93e-11	3.09e-11	1.99e-10	5.09e-10
0.00845	1.39e-10	5.57e-10	1.94e-10	4.66e-10	2.1e-10	6.17e-11	4.94e-11	3.49e-10	3.86e-11	3.7e-11	2.22e-10	5.28e-10
0.00873	1.48e-10	5.62e-10	1.98e-10	4.86e-10	2.21e-10	5.56e-11	5.4e-11	3.67e-10	4.01e-11	4.78e-11	2.36e-10	5.31e-10
0.00914	1.62e-10	5.74e-10	2.19e-10	5.11e-10	2.39e-10	5.86e-11	5.25e-11	3.92e-10	3.55e-11	4.94e-11	2.39e-10	5.42e-10
0.00939	1.57e-10	5.88e-10	2.24e-10	5.12e-10	2.64e-10	5.86e-11	5.71e-11	3.94e-10	3.09e-11	4.48e-11	2.58e-10	5.52e-10
0.0097	1.53e-10	5.91e-10	2.27e-10	5.37e-10	2.75e-10	7.25e-11	5.25e-11	4.12e-10	2.93e-11	6.94e-11	2.59e-10	5.59e-10
0.01011	1.73e-10	6.11e-10	2.38e-10	5.6e-10	3.01e-10	7.87e-11	6.17e-11	4.27e-10	2.78e-11	7.41e-11	2.84e-10	5.57e-10
0.01045	1.79e-10	6.14e-10	2.53e-10	5.74e-10	3.36e-10	7.87e-11	6.33e-11	4.35e-10	4.32e-11	8.64e-11	3.04e-10	5.65e-10
0.0107	1.91e-10	6.27e-10	2.93e-10	5.93e-10	3.53e-10	6.64e-11	6.02e-11	4.6e-10	4.17e-11	9.57e-11	3.09e-10	5.77e-10
0.01099	1.88e-10	6.44e-10	2.78e-10	6.11e-10	3.86e-10	6.79e-11	7.87e-11	4.55e-10	4.63e-11	1.13e-10	3.13e-10	5.79e-10
0.0113	1.99e-10	6.61e-10	2.76e-10	6.36e-10	3.97e-10	7.72e-11	6.79e-11	4.86e-10	2.93e-11	1.23e-10	3.33e-10	5.9e-10
0.01164	2.1e-10	6.76e-10	3.23e-10	6.62e-10	4.07e-10	9.41e-11	6.79e-11	5.02e-10	2.62e-11	1.33e-10	3.52e-10	5.97e-10
0.01199	2.24e-10	6.93e-10	3.09e-10	6.82e-10	4.24e-10	8.33e-11	6.17e-11	5.2e-10	4.01e-11	1.44e-10	3.8e-10	6e-10
0.01233	2.3e-10	7.24e-10	3.3e-10	6.98e-10	4.4e-10	9.72e-11	6.79e-11	5.32e-10	4.63e-11	1.56e-10	3.92e-10	6.2e-10
0.01265	2.56e-10	7.45e-10	3.49e-10	7.18e-10	4.58e-10	9.26e-11	7.56e-11	5.51e-10	4.17e-11	1.7e-10	4.17e-10	6.28e-10
0.01296	2.64e-10	7.73e-10	3.63e-10	7.48e-10	4.68e-10	8.8e-11	6.64e-11	5.68e-10	4.01e-11	1.74e-10	4.48e-10	6.42e-10
0.01337	2.79e-10	7.96e-10	3.9e-10	7.69e-10	4.86e-10	8.95e-11	6.64e-11	5.83e-10	4.94e-11	1.85e-10	4.74e-10	6.44e-10
0.01355	2.87e-10	8.1e-10	4.17e-10	7.92e-10	5.17e-10	8.49e-11	6.79e-11	6.08e-10	4.48e-11	1.94e-10	4.98e-10	6.57e-10
0.01396	3.02e-10	8.32e-10	4.24e-10	8.09e-10	5.23e-10	8.49e-11	7.41e-11	6.23e-10	3.55e-11	1.91e-10	5.15e-10	6.71e-10
0.01418	3.24e-10	8.49e-10	4.37e-10	8.26e-10	5.46e-10	8.95e-11	6.02e-11	6.37e-10	3.4e-11	1.99e-10	5.46e-10	6.78e-10
0.01452	3.36e-10	8.81e-10	4.61e-10	8.46e-10	5.65e-10	9.11e-11	7.56e-11	6.64e-10	4.47e-11	1.99e-10	5.74e-10	7.02e-10
0.0149	3.36e-10	9e-10	4.83e-10	8.73e-10	5.99e-10	1.05e-10	8.03e-11	6.74e-10	3.86e-11	2.01e-10	5.96e-10	7.07e-10
0.01521	3.52e-10	9.03e-10	4.94e-10	9e-10	6.22e-10	1.02e-10	9.57e-11	6.88e-10	4.47e-11	2.1e-10	6.03e-10	7.21e-10
0.01559	3.69e-10	8.98e-10	5.19e-10	9.2e-10	6.31e-10	1.03e-10	8.49e-11	6.98e-10	3.4e-11	2.24e-10	6.19e-10	7.25e-10
0.01587	3.75e-10	9.23e-10	5.28e-10	9.41e-10	6.68e-10	1.05e-10	9.11e-11	7.11e-10	3.86e-11	2.25e-10	6.47e-10	7.27e-10
0.01621	3.75e-10	9.31e-10	5.36e-10	9.57e-10	6.91e-10	1.11e-10	8.8e-11	7.27e-10	4.48e-11	2.35e-10	6.48e-10	7.32e-10
0.01643	3.73e-10	9.46e-10	5.57e-10	9.8e-10	7.22e-10	1.14e-10	9.57e-11	7.38e-10	4.48e-11	2.45e-10	6.73e-10	7.45e-10
0.01684	3.94e-10	9.61e-10	5.76e-10	9.89e-10	7.47e-10	1.1e-10	9.57e-11	7.58e-10	4.17e-11	2.53e-10	6.88e-10	7.47e-10
0.01718	4.04e-10	9.75e-10	5.83e-10	1.01e-09	7.76e-10	1.11e-10	1.22e-10	7.65e-10	4.32e-11	2.65e-10	7.01e-10	7.59e-10
0.0174	4.17e-10	9.75e-10	5.86e-10	1.05e-09	8.47e-10	1.23e-10	1.06e-10	7.95e-10	4.32e-11	2.78e-10	7.16e-10	7.58e-10
0.01775	4.31e-10	1e-09	6.1e-10	1.06e-09	8.49e-10	1.25e-10	9.72e-11	8.12e-10	5.25e-11	3.02e-10	7.39e-10	7.73e-10
0.01812	4.37e-10	1.02e-09	6.22e-10	1.09e-09	8.61e-10	1.37e-10	9.11e-11	8.32e-10	4.17e-11	2.96e-10	7.59e-10	7.75e-10
0.01837	4.55e-10	1.04e-09	6.53e-10	1.11e-09	8.8e-10	1.31e-10	1.11e-10	8.4e-10	5.09e-11	3.19e-10	7.87e-10	7.84e-10
0.01872	4.8e-10	1.07e-09	6.76e-10	1.13e-09	8.89e-10	1.28e-10	1.03e-10	8.64e-10	5.25e-11	3.27e-10	8.18e-10	7.99e-10
0.01909	4.88e-10	1.09e-09	6.94e-10	1.15e-09	8.95e-10	1.44e-10	9.72e-11	8.72e-10	5.09e-11	3.49e-10	8.53e-10	8.01e-10
0.01931	5.02e-10	1.11e-09	7.1e-10	1.17e-09	9.2e-10	1.53e-10	1.11e-10	8.97e-10	4.32e-11	3.6e-10	8.78e-10	8.12e-10
0.01978	5.23e-10	1.13e-09	7.33e-10	1.21e-09	9.35e-10	1.51e-10	8.64e-11	9.17e-10	3.24e-11	3.66e-10	8.97e-10	8.29e-10
0.02009	5.39e-10	1.16e-09	7.62e-10	1.24e-09	9.77e-10	1.4e-10	9.26e-11	9.31e-10	5.4e-11	3.72e-10	9.4e-10	8.29e-10
0.02031	5.51e-10	1.19e-09	7.78e-10	1.26e-09	1e-09	1.45e-10	1.08e-10	9.57e-10	4.17e-11	3.72e-10	9.77e-10	8.5e-10
0.02069	5.69e-10	1.21e-09	8.01e-10	1.27e-09	1.02e-09	1.45e-10	9.11e-11	9.68e-10	5.25e-11	3.8e-10	1e-09	8.55e-10
0.02103	5.97e-10	1.22e-09	8.44e-10	1.3e-09	1.05e-09	1.62e-10	1.1e-10	9.88e-10	3.55e-11	3.87e-10	1.03e-09	8.7e-10
0.02138	6.03e-10	1.24e-09	8.5e-10	1.33e-09	1.1e-09	1.64e-10	1.1e-10	1e-09	5.09e-11	3.89e-10	1.05e-09	8.83e-10
0.02166	6.19e-10	1.25e-09	8.7e-10	1.34e-09	1.12e-09	1.67e-10	1.17e-10	1.02e-09	5.4e-11	3.97e-10	1.09e-09	8.95e-10
0.02197	6.22e-10	1.27e-09	8.84e-10	1.37e-09	1.15e-09	1.7e-10	1.19e-10	1.04e-09	4.48e-11	3.95e-10	1.1e-09	9.04e-10
0.02225	6.34e-10	1.29e-09	9.04e-10	1.38e-09	1.2e-09	1.81e-10	1.27e-10	1.05e-09	4.32e-11	4.07e-10	1.12e-09	9.11e-10
0.0226	6.5e-10	1.29e-09	9.23e-10	1.41e-09	1.23e-09	1.74e-10	1.27e-10	1.06e-09	4.01e-11	4.17e-10	1.14e-09	9.18e-10
0.02294	6.53e-10	1.3e-09	9.32e-10	1.44e-09	1.28e-09	1.88e-10	1.37e-10	1.08e-09	4.32e-11	4.34e-10	1.16e-09	9.28e-10
0.02326	6.64e-10	1.31e-09	9.48e-10	1.45e-09	1.33e-09	1.73e-10	1.3e-10	1.1e-09	5.56e-11	4.38e-10	1.17e-09	9.23e-10
0.02357	6.77e-10	1.32e-09	9.66e-10	1.48e-09	1.34e-09	1.81e-10	1.23e-10	1.11e-09	5.09e-11	4.48e-10	1.19e-09	9.29e-10
0.02385	6.84e-10	1.34e-09	9.75e-10	1.5e-09	1.36e-09	1.93e-10	1.4e-10	1.12e-09	4.78e-11	4.65e-10	1.22e-09	9.37e-10
0.02426	6.94e-10	1.37e-09	9.95e-10	1.52e-09	1.41e-09	1.87e-10	1.28e-10	1.15e-09	4.78e-11	4.78e-10	1.24e-09	9.48e-10
0.02454	7.07e-10	1.37e-09	1.01e-09	1.55e-09	1.43e-09	2.02e-10	1.27e-10	1.17e-09	4.63e-11	4.97e-10	1.27e-09	9.51e-10
0.02485	7.19e-10	1.4e-09	1.05e-09	1.58e-09	1.46e-09	2.1e-10	1.07e-10	1.19e-09	5.25e-11	5.19e-10	1.3e-09	9.52e-10
0.0252	7.44e-10	1.42e-09	1.08e-09	1.6e-09	1.47e-09	2.11e-10	1.5e-10	1.19e-09	4.32e-11	5.25e-10	1.33e-09	9.66e-10
0.02548	7.65e-10	1.45e-09	1.08e-09	1.62e-09	1.49e-09	2.1e-10	1.23e-10	1.22e-09	4.78e-11	5.4e-10	1.36e-09	9.75e-10
0.02585	7.93e-10	1.48e-09	1.12e-09	1.65e-09	1.51e-09	2.19e-10	1.54e-10	1.24e-09	6.02e-11	5.46e-10	1.41e-09	9.92e-10
0.02623	8.19e-10	1.5e-09	1.15e-09	1.68e-09	1.53e-09	2.15e-10	1.14e-10	1.25e-09	5.56e-11	5.51e-10	1.45e-09	1.01e-09
0.02648	8.32e-10	1.53e-09	1.18e-09	1.71e-09	1.57e-09	2.21e-10	1.44e-10	1.27e-09	5.4e-11	5.53e-10	1.48e-09	1.02e-09
0.02676	8.32e-10	1.56e-09	1.2e-09	1.73e-09	1.59e-09	2.21e-10	1.4e-10	1.29e-09	5.56e-11	5.74e-10	1.52e-09	1.02e-09
0.02711	8.73e-10	1.57e-09	1.25e-09	1.76e-09	1.63e-09	2.1e-10	1.3e-10	1.31e-09	5.71e-11	5.66e-10	1.55e-09	1.04e-09
0.02748	8.9e-10	1.6e-09	1.26e-09	1.78e-09	1.66e-09	2.27e-10	1.3e-10	1.33e-09	7.1e-11	5.85e-10	1.58e-09	1.05e-09
0.02776	9.04e-10	1.6e-09	1.29e-09	1.8e-09	1.7e-09	2.33e-10	1.53e-10	1.36e-09	5.71e-11	5.85e-10	1.61e-09	1.07e-09
0.02811	9.17e-10	1.62e-09	1.29e-09	1.83e-09	1.74e-09	2.44e-10	1.56e-10	1.37e-09	5.25e-11	5.91e-10	1.64e-09	1.07e-09
0.02839	9.26e-10	1.64e-09	1.32e-09	1.85e-09	1.78e-09	2.5e-10	1.48e-10	1.39e-09	5.71e-11	6.08e-10	1.66e-09	1.08e-09
0.02877	9.38e-10	1.65e-09	1.34e-09	1.88e-09	1.82e-09	2.5e-10	1.54e-10	1.41e-09	5.25e-11	6.02e-10	1.68e-09	1.09e-09
0.02908	9.58e-10	1.66e-09	1.37e-09	1.9e-09	1.86e-09	2.62e-10	1.56e-10	1.42e-09	5.86e-11	6.22e-10	1.69e-09	1.09e-09
0.02945	9.35e-10	1.67e-09	1.4e-09	1.93e-09	1.91e-09	2.64e-10	1.53e-10	1.43e-09	4.94e-11	6.33e-10	1.72e-09	1.1e-09
0.02967	9.66e-10	1.69e-09	1.4e-09	1.96e-09	1.96e-09	2.64e-10	1.65e-10	1.44e-09	5.56e-11	6.48e-10	1.74e-09	1.1e-09
0.03005	9.92e-10	1.69e-09	1.43e-09	1.97e-09	1.99e-09	2.7e-10	1.59e-10	1.47e-09	5.86e-11	6.56e-10	1.76e-09	1.1e-09
0.03036	1e-09	1.71e-09	1.43e-09	2e-09	2.03e-09	2.86e-10	1.79e-10	1.49e-09	4.48e-11	6.73e-10	1.78e-09	1.11e-09
0.03064	1.02e-09	1.73e-09	1.46e-09	2.03e-09	2.06e-09	2.86e-10	1.57e-10	1.52e-09	6.33e-11	6.88e-10	1.82e-09	1.12e-09
0.03099	1.04e-09	1.75e-09	1.49e-09	2.05e-09	2.09e-09	2.98e-10	1.73e-10	1.53e-09	5.71e-11	7.05e-10	1.84e-09	1.13e-09
0.03124	1.06e-09	1.76e-09	1.51e-09	2.08e-09	2.11e-09	3.01e-10	1.68e-10	1.54e-09	5.25e-11	7.16e-10	1.88e-09	1.13e-09
0.03168	1.08e-09	1.8e-09	1.55e-09	2.11e-09	2.13e-09	3.12e-10	1.59e-10	1.56e-09	6.17e-11	7.32e-10	1.92e-09	1.15e-09
0.03193	1.1e-09	1.81e-09	1.56e-09	2.14e-09	2.14e-09	3.12e-10	1.74e-10	1.58e-09	4.94e-11	7.58e-10	1.96e-09	1.15e-09
0.0323	1.13e-09	1.86e-09	1.6e-09	2.17e-09	2.16e-09	3.29e-10	1.48e-10	1.6e-09	6.02e-11	7.59e-10	2.01e-09	1.17e-09
0.03265	1.15e-09	1.87e-09	1.62e-09	2.2e-09	2.19e-09	3.18e-10	1.67e-10	1.63e-09	6.17e-11	7.69e-10	2.05e-09	1.18e-09
0.03293	1.17e-09	1.89e-09	1.66e-09	2.21e-09	2.22e-09	3.24e-10	1.84e-10	1.65e-09	6.94e-11	7.73e-10	2.08e-09	1.18e-09
0.03324	1.19e-09	1.93e-09	1.71e-09	2.25e-09	2.26e-09	3.23e-10	1.7e-10	1.69e-09	6.33e-11	7.78e-10	2.14e-09	1.2e-09
0.03352	1.23e-09	1.95e-09	1.73e-09	2.28e-09	2.3e-09	3.38e-10	1.67e-10	1.68e-09	5.86e-11	7.89e-10	2.17e-09	1.21e-09
0.03393	1.25e-09	1.97e-09	1.75e-09	2.31e-09	2.35e-09	3.43e-10	1.73e-10	1.71e-09	5.25e-11	7.95e-10	2.21e-09	1.22e-09
0.03418	1.27e-09	1.99e-09	1.78e-09	2.33e-09	2.4e-09	3.58e-10	1.84e-10	1.73e-09	6.02e-11	8.06e-10	2.23e-09	1.23e-09
0.03452	1.28e-09	2e-09	1.81e-09	2.35e-09	2.44e-09	3.64e-10	1.81e-10	1.75e-09	6.17e-11	8.04e-10	2.26e-09	1.24e-09
0.0349	1.3e-09	2.02e-09	1.84e-09	2.38e-09	2.5e-09	3.61e-10	1.81e-10	1.76e-09	3.86e-11	8.18e-10	2.29e-09	1.24e-09
0.03515	1.31e-09	2.03e-09	1.87e-09	2.4e-09	2.56e-09	3.6e-10	2.04e-10	1.78e-09	5.86e-11	8.3e-10	2.31e-09	1.26e-09
0.03549	1.33e-09	2.04e-09	1.88e-09	2.43e-09	2.61e-09	3.75e-10	1.9e-10	1.79e-09	5.25e-11	8.44e-10	2.35e-09	1.26e-09
0.03578	1.33e-09	2.04e-09	1.92e-09	2.45e-09	2.67e-09	3.9e-10	1.91e-10	1.81e-09	4.94e-11	8.5e-10	2.35e-09	1.26e-09
0.03609	1.35e-09	2.06e-09	1.93e-09	2.48e-09	2.72e-09	3.75e-10	1.99e-10	1.83e-09	5.25e-11	8.7e-10	2.39e-09	1.27e-09
0.0365	1.37e-09	2.08e-09	1.95e-09	2.52e-09	2.75e-09	3.84e-10	2.13e-10	1.84e-09	6.64e-11	8.75e-10	2.4e-09	1.28e-09
0.03672	1.37e-09	2.09e-09	1.97e-09	2.54e-09	2.79e-09	3.86e-10	2.27e-10	1.87e-09	6.48e-11	8.97e-10	2.43e-09	1.28e-09
0.03706	1.4e-09	2.12e-09	2e-09	2.56e-09	2.82e-09	3.97e-10	2.04e-10	1.89e-09	5.87e-11	9.17e-10	2.47e-09	1.29e-09
0.03744	1.42e-09	2.13e-09	2.02e-09	2.6e-09	2.85e-09	4.18e-10	2.05e-10	1.9e-09	6.94e-11	9.24e-10	2.49e-09	1.29e-09
0.03769	1.43e-09	2.17e-09	2.05e-09	2.62e-09	2.89e-09	4.29e-10	1.96e-10	1.92e-09	7.41e-11	9.48e-10	2.54e-09	1.3e-09
0.03809	1.46e-09	2.18e-09	2.08e-09	2.65e-09	2.9e-09	4.41e-10	1.7e-10	1.95e-09	7.25e-11	9.66e-10	2.58e-09	1.31e-09
0.03841	1.5e-09	2.22e-09	2.11e-09	2.68e-09	2.93e-09	4.43e-10	2.21e-10	1.97e-09	6.02e-11	9.75e-10	2.62e-09	1.32e-09
0.03866	1.52e-09	2.24e-09	2.15e-09	2.71e-09	2.94e-09	4.48e-10	2.3e-10	1.99e-09	8.02e-11	9.86e-10	2.67e-09	1.33e-09
0.03906	1.56e-09	2.26e-09	2.17e-09	2.74e-09	2.98e-09	4.71e-10	2.04e-10	2.01e-09	7.41e-11	9.94e-10	2.72e-09	1.34e-09
0.03938	1.58e-09	2.28e-09	2.2e-09	2.77e-09	3.05e-09	4.61e-10	2.35e-10	2.04e-09	7.87e-11	1.01e-09	2.76e-09	1.36e-09
0.03969	1.6e-09	2.32e-09	2.25e-09	2.8e-09	3.06e-09	4.75e-10	2.24e-10	2.06e-09	6.64e-11	1.01e-09	2.81e-09	1.36e-09
0.04	1.62e-09	2.34e-09	2.28e-09	2.81e-09	3.14e-09	4.88e-10	2.11e-10	2.08e-09	7.25e-11	1.02e-09	2.86e-09	1.38e-09
0.04031	1.65e-09	2.36e-09	2.31e-09	2.86e-09	3.18e-09	4.82e-10	2.28e-10	2.08e-09	4.32e-11	1.04e-09	2.89e-09	1.39e-09
0.04069	1.67e-09	2.38e-09	2.36e-09	2.88e-09	3.23e-09	5.06e-10	2.36e-10	2.11e-09	6.64e-11	1.04e-09	2.92e-09	1.4e-09
0.041	1.7e-09	2.39e-09	2.37e-09	2.91e-09	3.28e-09	5.15e-10	2.56e-10	2.12e-09	7.1e-11	1.05e-09	2.96e-09	1.4e-09
0.04129	1.72e-09	2.4e-09	2.41e-09	2.94e-09	3.31e-09	5.25e-10	2.5e-10	2.15e-09	4.94e-11	1.06e-09	2.98e-09	1.42e-09
0.0416	1.73e-09	2.42e-09	2.43e-09	2.96e-09	3.39e-09	5.36e-10	2.55e-10	2.16e-09	6.02e-11	1.06e-09	3.01e-09	1.42e-09
0.04188	1.75e-09	2.42e-09	2.44e-09	2.99e-09	3.43e-09	5.45e-10	2.44e-10	2.19e-09	6.64e-11	1.07e-09	3.04e-09	1.42e-09
0.04222	1.74e-09	2.45e-09	2.49e-09	3.02e-09	3.49e-09	5.48e-10	2.55e-10	2.2e-09	7.1e-11	1.1e-09	3.07e-09	1.44e-09
0.04263	1.78e-09	2.44e-09	2.5e-09	3.05e-09	3.56e-09	5.59e-10	2.64e-10	2.22e-09	6.33e-11	1.11e-09	3.09e-09	1.44e-09
0.04288	1.8e-09	2.45e-09	2.52e-09	3.09e-09	3.59e-09	5.65e-10	2.73e-10	2.25e-09	7.1e-11	1.13e-09	3.11e-09	1.44e-09
0.04319	1.81e-09	2.48e-09	2.55e-09	3.1e-09	3.64e-09	5.79e-10	2.79e-10	2.26e-09	6.79e-11	1.15e-09	3.14e-09	1.45e-09
0.04357	1.83e-09	2.5e-09	2.57e-09	3.14e-09	3.69e-09	5.86e-10	2.73e-10	2.29e-09	7.56e-11	1.17e-09	3.18e-09	1.45e-09
0.04379	1.84e-09	2.52e-09	2.59e-09	3.17e-09	3.71e-09	5.97e-10	2.78e-10	2.3e-09	6.33e-11	1.18e-09	3.22e-09	1.45e-09
0.04416	1.88e-09	2.56e-09	2.62e-09	3.19e-09	3.75e-09	6.1e-10	2.78e-10	2.34e-09	8.64e-11	1.19e-09	3.27e-09	1.47e-09
0.04454	1.9e-09	2.57e-09	2.67e-09	3.24e-09	3.77e-09	6.13e-10	3.02e-10	2.35e-09	8.8e-11	1.21e-09	3.31e-09	1.48e-09
0.04488	1.94e-09	2.62e-09	2.7e-09	3.26e-09	3.83e-09	6.27e-10	2.55e-10	2.37e-09	8.18e-11	1.23e-09	3.37e-09	1.48e-09
0.04517	1.99e-09	2.63e-09	2.74e-09	3.29e-09	3.85e-09	6.45e-10	2.61e-10	2.39e-09	6.79e-11	1.24e-09	3.41e-09	1.5e-09
0.04542	2e-09	2.66e-09	2.8e-09	3.33e-09	3.88e-09	6.48e-10	2.86e-10	2.41e-09	8.02e-11	1.26e-09	3.47e-09	1.5e-09
0.04579	2.03e-09	2.69e-09	2.8e-09	3.36e-09	3.94e-09	6.34e-10	2.92e-10	2.43e-09	7.56e-11	1.27e-09	3.51e-09	1.52e-09
0.04611	2.05e-09	2.72e-09	2.85e-09	3.39e-09	3.97e-09	6.44e-10	2.92e-10	2.46e-09	7.25e-11	1.28e-09	3.57e-09	1.53e-09
0.04645	2.09e-09	2.74e-09	2.88e-09	3.41e-09	4.01e-09	6.54e-10	2.86e-10	2.48e-09	7.41e-11	1.29e-09	3.61e-09	1.53e-09
0.04679	2.12e-09	2.77e-09	2.93e-09	3.45e-09	4.07e-09	6.79e-10	2.87e-10	2.51e-09	8.18e-11	1.3e-09	3.66e-09	1.54e-09
0.04717	2.15e-09	2.78e-09	2.97e-09	3.47e-09	4.12e-09	6.88e-10	3.18e-10	2.51e-09	7.25e-11	1.3e-09	3.7e-09	1.56e-09
0.04742	2.18e-09	2.79e-09	3e-09	3.5e-09	4.17e-09	6.91e-10	3.13e-10	2.54e-09	7.72e-11	1.31e-09	3.74e-09	1.56e-09
0.04776	2.19e-09	2.81e-09	3.02e-09	3.53e-09	4.21e-09	7.1e-10	3.13e-10	2.55e-09	6.95e-11	1.33e-09	3.76e-09	1.58e-09
0.04805	2.17e-09	2.83e-09	3.08e-09	3.55e-09	4.26e-09	7.27e-10	3.21e-10	2.57e-09	7.41e-11	1.32e-09	3.79e-09	1.58e-09
0.04839	2.23e-09	2.83e-09	3.09e-09	3.59e-09	4.33e-09	7.36e-10	3.52e-10	2.59e-09	6.33e-11	1.34e-09	3.81e-09	1.59e-09
0.04867	2.23e-09	2.84e-09	3.11e-09	3.61e-09	4.37e-09	7.5e-10	3.21e-10	2.62e-09	6.94e-11	1.36e-09	3.84e-09	1.59e-09
0.04902	2.25e-09	2.87e-09	3.12e-09	3.65e-09	4.44e-09	7.45e-10	3.44e-10	2.63e-09	7.41e-11	1.39e-09	3.88e-09	1.58e-09
0.04927	2.27e-09	2.87e-09	3.17e-09	3.69e-09	4.47e-09	7.58e-10	3.3e-10	2.66e-09	8.49e-11	1.38e-09	3.9e-09	1.6e-09
0.04964	2.27e-09	2.89e-09	3.18e-09	3.71e-09	4.54e-09	7.58e-10	3.38e-10	2.67e-09	7.56e-11	1.41e-09	3.94e-09	1.61e-09
0.04996	2.31e-09	2.91e-09	3.2e-09	3.74e-09	4.58e-09	7.81e-10	3.5e-10	2.7e-09	1.1e-10	1.43e-09	3.98e-09	1.61e-09
0.05024	2.35e-09	2.94e-09	3.24e-09	3.77e-09	4.63e-09	7.95e-10	3.56e-10	2.72e-09	8.95e-11	1.44e-09	4.02e-09	1.61e-09
0.05061	2.36e-09	2.95e-09	3.27e-09	3.8e-09	4.68e-09	8.21e-10	3.63e-10	2.74e-09	8.03e-11	1.47e-09	4.06e-09	1.63e-09
0.05093	2.4e-09	2.99e-09	3.31e-09	3.83e-09	4.7e-09	8.21e-10	3.77e-10	2.77e-09	8.64e-11	1.5e-09	4.11e-09	1.63e-09
0.0513	2.44e-09	3.02e-09	3.35e-09	3.86e-09	4.75e-09	8.29e-10	3.69e-10	2.79e-09	8.33e-11	1.51e-09	4.16e-09	1.64e-09
0.05158	2.44e-09	3.06e-09	3.39e-09	3.89e-09	4.78e-09	8.27e-10	3.81e-10	2.8e-09	8.18e-11	1.52e-09	4.22e-09	1.65e-09
0.0519	2.5e-09	3.08e-09	3.42e-09	3.93e-09	4.82e-09	8.55e-10	3.67e-10	2.83e-09	7.72e-11	1.53e-09	4.28e-09	1.66e-09
0.05227	2.55e-09	3.11e-09	3.48e-09	3.97e-09	4.88e-09	8.52e-10	3.55e-10	2.86e-09	7.72e-11	1.55e-09	4.33e-09	1.67e-09
0.05252	2.57e-09	3.14e-09	3.52e-09	3.99e-09	4.92e-09	8.63e-10	3.72e-10	2.87e-09	7.87e-11	1.56e-09	4.39e-09	1.69e-09
0.05293	2.6e-09	3.15e-09	3.56e-09	4.04e-09	4.98e-09	8.73e-10	3.5e-10	2.9e-09	5.4e-11	1.57e-09	4.44e-09	1.69e-09
0.05321	2.64e-09	3.19e-09	3.6e-09	4.07e-09	4.99e-09	8.84e-10	3.64e-10	2.92e-09	6.64e-11	1.58e-09	4.49e-09	1.7e-09
0.05349	2.65e-09	3.2e-09	3.64e-09	4.1e-09	5.05e-09	9e-10	4.01e-10	2.93e-09	8.02e-11	1.58e-09	4.52e-09	1.71e-09
0.05384	2.67e-09	3.21e-09	3.66e-09	4.13e-09	5.12e-09	9.06e-10	4.09e-10	2.94e-09	7.72e-11	1.6e-09	4.56e-09	1.73e-09
0.05418	2.71e-09	3.22e-09	3.71e-09	4.17e-09	5.18e-09	9.12e-10	4e-10	2.98e-09	7.25e-11	1.61e-09	4.58e-09	1.72e-09
0.05453	2.72e-09	3.24e-09	3.74e-09	4.19e-09	5.25e-09	9.12e-10	4.11e-10	2.99e-09	7.56e-11	1.61e-09	4.63e-09	1.74e-09
0.05478	2.75e-09	3.25e-09	3.77e-09	4.22e-09	5.32e-09	9.48e-10	4.49e-10	3.02e-09	7.25e-11	1.63e-09	4.66e-09	1.74e-09
0.05515	2.75e-09	3.26e-09	3.79e-09	4.25e-09	5.38e-09	9.61e-10	4.12e-10	3.04e-09	7.41e-11	1.64e-09	4.68e-09	1.75e-09
0.0555	2.78e-09	3.28e-09	3.82e-09	4.29e-09	5.47e-09	9.85e-10	4.29e-10	3.06e-09	7.72e-11	1.67e-09	4.71e-09	1.74e-09
0.05581	2.81e-09	3.29e-09	3.84e-09	4.31e-09	5.52e-09	9.95e-10	4.21e-10	3.08e-09	8.64e-11	1.68e-09	4.75e-09	1.76e-09
0.05612	2.82e-09	3.31e-09	3.87e-09	4.35e-09	5.57e-09	1.02e-09	4.35e-10	3.11e-09	1.05e-10	1.7e-09	4.77e-09	1.76e-09
0.05643	2.85e-09	3.33e-09	3.91e-09	4.38e-09	5.63e-09	1.04e-09	4.31e-10	3.13e-09	9.26e-11	1.73e-09	4.82e-09	1.76e-09
0.05678	2.88e-09	3.36e-09	3.93e-09	4.41e-09	5.66e-09	1.05e-09	4.37e-10	3.15e-09	8.03e-11	1.74e-09	4.86e-09	1.77e-09
0.05709	2.94e-09	3.37e-09	3.98e-09	4.45e-09	5.69e-09	1.07e-09	4.38e-10	3.18e-09	9.57e-11	1.76e-09	4.9e-09	1.77e-09
0.0574	2.96e-09	3.42e-09	4.02e-09	4.48e-09	5.74e-09	1.1e-09	4.54e-10	3.19e-09	8.18e-11	1.8e-09	4.96e-09	1.79e-09
0.05772	2.97e-09	3.46e-09	4.06e-09	4.51e-09	5.74e-09	1.12e-09	4.32e-10	3.21e-09	7.72e-11	1.82e-09	5.01e-09	1.8e-09
0.05803	3.02e-09	3.47e-09	4.1e-09	4.53e-09	5.78e-09	1.14e-09	4.61e-10	3.24e-09	7.87e-11	1.83e-09	5.07e-09	1.81e-09
0.05831	3.06e-09	3.5e-09	4.15e-09	4.58e-09	5.8e-09	1.15e-09	4.48e-10	3.26e-09	9.88e-11	1.83e-09	5.13e-09	1.81e-09
0.05869	3.1e-09	3.53e-09	4.19e-09	4.61e-09	5.87e-09	1.16e-09	4.57e-10	3.29e-09	9.26e-11	1.86e-09	5.19e-09	1.83e-09
0.059	3.12e-09	3.56e-09	4.23e-09	4.65e-09	5.92e-09	1.18e-09	4.46e-10	3.31e-09	8.8e-11	1.87e-09	5.24e-09	1.84e-09
0.05935	3.17e-09	3.59e-09	4.28e-09	4.68e-09	5.97e-09	1.18e-09	4.57e-10	3.34e-09	8.8e-11	1.88e-09	5.31e-09	1.85e-09
0.05972	3.2e-09	3.62e-09	4.35e-09	4.72e-09	6.04e-09	1.2e-09	4.54e-10	3.37e-09	7.1e-11	1.88e-09	5.35e-09	1.86e-09
0.06	3.23e-09	3.64e-09	4.37e-09	4.75e-09	6.1e-09	1.23e-09	4.54e-10	3.38e-09	9.57e-11	1.9e-09	5.4e-09	1.87e-09
0.06025	3.25e-09	3.65e-09	4.43e-09	4.78e-09	6.18e-09	1.24e-09	4.88e-10	3.4e-09	8.95e-11	1.91e-09	5.43e-09	1.88e-09
0.06066	3.26e-09	3.65e-09	4.46e-09	4.82e-09	6.25e-09	1.25e-09	4.72e-10	3.44e-09	7.56e-11	1.92e-09	5.46e-09	1.88e-09
0.06094	3.28e-09	3.67e-09	4.48e-09	4.85e-09	6.31e-09	1.29e-09	5.03e-10	3.45e-09	8.95e-11	1.94e-09	5.49e-09	1.89e-09
0.06129	3.3e-09	3.68e-09	4.5e-09	4.88e-09	6.38e-09	1.31e-09	4.92e-10	3.46e-09	8.49e-11	1.94e-09	5.51e-09	1.9e-09
0.06157	3.33e-09	3.69e-09	4.53e-09	4.91e-09	6.44e-09	1.32e-09	5.06e-10	3.49e-09	7.72e-11	1.96e-09	5.54e-09	1.9e-09
0.06182	3.35e-09	3.71e-09	4.55e-09	4.95e-09	6.53e-09	1.32e-09	5.15e-10	3.51e-09	8.49e-11	1.99e-09	5.57e-09	1.9e-09
0.06223	3.37e-09	3.73e-09	4.59e-09	4.98e-09	6.58e-09	1.35e-09	5.26e-10	3.54e-09	9.72e-11	1.99e-09	5.6e-09	1.91e-09
0.06254	3.39e-09	3.75e-09	4.59e-09	5.02e-09	6.65e-09	1.36e-09	5.23e-10	3.55e-09	8.8e-11	2.03e-09	5.62e-09	1.91e-09
0.06282	3.43e-09	3.77e-09	4.66e-09	5.04e-09	6.69e-09	1.37e-09	5.36e-10	3.58e-09	9.26e-11	2.05e-09	5.67e-09	1.91e-09
0.0632	3.46e-09	3.79e-09	4.67e-09	5.09e-09	6.73e-09	1.39e-09	5.51e-10	3.59e-09	8.49e-11	2.07e-09	5.72e-09	1.92e-09
0.06348	3.49e-09	3.83e-09	4.7e-09	5.12e-09	6.78e-09	1.43e-09	5.4e-10	3.62e-09	9.26e-11	2.09e-09	5.77e-09	1.93e-09
0.06376	3.53e-09	3.85e-09	4.75e-09	5.15e-09	6.8e-09	1.45e-09	5.57e-10	3.65e-09	9.57e-11	2.1e-09	5.83e-09	1.94e-09
0.06417	3.58e-09	3.88e-09	4.8e-09	5.19e-09	6.83e-09	1.45e-09	5.56e-10	3.68e-09	9.57e-11	2.13e-09	5.87e-09	1.96e-09
0.06451	3.61e-09	3.92e-09	4.86e-09	5.22e-09	6.88e-09	1.46e-09	5.59e-10	3.69e-09	9.72e-11	2.15e-09	5.93e-09	1.96e-09
0.06479	3.65e-09	3.94e-09	4.89e-09	5.26e-09	6.94e-09	1.5e-09	5.52e-10	3.71e-09	1e-10	2.18e-09	5.99e-09	1.96e-09
0.06514	3.7e-09	3.98e-09	4.96e-09	5.29e-09	6.97e-09	1.5e-09	5.43e-10	3.73e-09	9.57e-11	2.2e-09	6.05e-09	1.98e-09
0.06542	3.72e-09	4e-09	5e-09	5.32e-09	7.03e-09	1.54e-09	5.85e-10	3.77e-09	1e-10	2.2e-09	6.12e-09	2e-09
0.06567	3.78e-09	4.03e-09	5.05e-09	5.36e-09	7.08e-09	1.55e-09	5.53e-10	3.79e-09	8.18e-11	2.21e-09	6.16e-09	2e-09
0.06611	3.83e-09	4.05e-09	5.1e-09	5.4e-09	7.13e-09	1.56e-09	5.68e-10	3.81e-09	8.8e-11	2.22e-09	6.22e-09	2.01e-09
0.06645	3.85e-09	4.06e-09	5.17e-09	5.43e-09	7.19e-09	1.59e-09	5.79e-10	3.84e-09	9.41e-11	2.25e-09	6.26e-09	2.02e-09
0.06673	3.87e-09	4.09e-09	5.19e-09	5.46e-09	7.26e-09	1.6e-09	5.69e-10	3.86e-09	8.33e-11	2.24e-09	6.31e-09	2.02e-09
0.06701	3.9e-09	4.1e-09	5.23e-09	5.51e-09	7.34e-09	1.61e-09	5.6e-10	3.9e-09	8.33e-11	2.23e-09	6.34e-09	2.03e-09
0.06733	3.92e-09	4.13e-09	5.26e-09	5.53e-09	7.39e-09	1.61e-09	5.82e-10	3.91e-09	9.11e-11	2.27e-09	6.38e-09	2.03e-09
0.0677	3.95e-09	4.13e-09	5.29e-09	5.56e-09	7.46e-09	1.66e-09	6.11e-10	3.94e-09	9.88e-11	2.29e-09	6.39e-09	2.04e-09
0.06802	3.96e-09	4.15e-09	5.34e-09	5.6e-09	7.51e-09	1.64e-09	6.23e-10	3.96e-09	9.11e-11	2.3e-09	6.42e-09	2.05e-09
0.06836	3.98e-09	4.16e-09	5.35e-09	5.63e-09	7.6e-09	1.66e-09	6.2e-10	3.98e-09	9.88e-11	2.32e-09	6.45e-09	2.04e-09
0.0687	4.01e-09	4.18e-09	5.39e-09	5.66e-09	7.65e-09	1.68e-09	6.19e-10	3.98e-09	9.26e-11	2.34e-09	6.49e-09	2.05e-09
0.06895	4.03e-09	4.19e-09	5.42e-09	5.7e-09	7.73e-09	1.73e-09	6.27e-10	4.02e-09	1.02e-10	2.36e-09	6.53e-09	2.06e-09
0.06936	4.06e-09	4.21e-09	5.47e-09	5.74e-09	7.79e-09	1.73e-09	6.37e-10	4.04e-09	9.72e-11	2.4e-09	6.57e-09	2.07e-09
0.06967	4.1e-09	4.26e-09	5.49e-09	5.78e-09	7.87e-09	1.77e-09	6.44e-10	4.06e-09	9.72e-11	2.42e-09	6.63e-09	2.07e-09
0.06992	4.13e-09	4.28e-09	5.54e-09	5.81e-09	7.94e-09	1.77e-09	6.45e-10	4.08e-09	9.72e-11	2.45e-09	6.67e-09	2.08e-09
0.0703	4.17e-09	4.31e-09	5.59e-09	5.85e-09	7.95e-09	1.81e-09	6.23e-10	4.11e-09	1.05e-10	2.47e-09	6.73e-09	2.09e-09
0.07064	4.23e-09	4.33e-09	5.63e-09	5.89e-09	7.97e-09	1.84e-09	6.25e-10	4.14e-09	1.06e-10	2.49e-09	6.79e-09	2.09e-09
0.07083	4.26e-09	4.37e-09	5.68e-09	5.92e-09	8e-09	1.85e-09	6.44e-10	4.17e-09	1.03e-10	2.51e-09	6.85e-09	2.1e-09
0.07121	4.33e-09	4.4e-09	5.73e-09	5.95e-09	8.03e-09	1.88e-09	6.51e-10	4.18e-09	1.1e-10	2.53e-09	6.92e-09	2.11e-09
0.07152	4.35e-09	4.42e-09	5.79e-09	6e-09	8.09e-09	1.9e-09	6.48e-10	4.21e-09	1.08e-10	2.56e-09	6.97e-09	2.12e-09
0.07193	4.38e-09	4.45e-09	5.82e-09	6.03e-09	8.15e-09	1.9e-09	6.67e-10	4.24e-09	1.05e-10	2.57e-09	7.03e-09	2.12e-09
0.07218	4.45e-09	4.48e-09	5.86e-09	6.06e-09	8.19e-09	1.94e-09	6.54e-10	4.26e-09	1e-10	2.57e-09	7.09e-09	2.15e-09
0.07249	4.48e-09	4.51e-09	5.92e-09	6.1e-09	8.28e-09	1.96e-09	6.65e-10	4.28e-09	1.06e-10	2.59e-09	7.13e-09	2.15e-09
0.0728	4.54e-09	4.53e-09	5.98e-09	6.13e-09	8.36e-09	1.96e-09	6.73e-10	4.3e-09	1.16e-10	2.61e-09	7.19e-09	2.16e-09
0.07312	4.53e-09	4.55e-09	6.01e-09	6.17e-09	8.41e-09	2e-09	6.94e-10	4.33e-09	1e-10	2.62e-09	7.24e-09	2.17e-09
0.07352	4.57e-09	4.56e-09	6.06e-09	6.2e-09	8.46e-09	2.03e-09	7.05e-10	4.35e-09	1.02e-10	2.64e-09	7.27e-09	2.16e-09
0.07374	4.6e-09	4.58e-09	6.09e-09	6.24e-09	8.54e-09	2.04e-09	7.05e-10	4.38e-09	1e-10	2.64e-09	7.31e-09	2.18e-09
0.07412	4.63e-09	4.59e-09	6.1e-09	6.28e-09	8.6e-09	2.09e-09	6.98e-10	4.39e-09	1.05e-10	2.65e-09	7.33e-09	2.19e-09
0.07449	4.63e-09	4.6e-09	6.14e-09	6.3e-09	8.68e-09	2.09e-09	6.93e-10	4.41e-09	9.72e-11	2.67e-09	7.36e-09	2.19e-09
0.07478	4.68e-09	4.61e-09	6.19e-09	6.34e-09	8.76e-09	2.11e-09	6.93e-10	4.44e-09	1.05e-10	2.71e-09	7.4e-09	2.2e-09
0.07512	4.68e-09	4.63e-09	6.2e-09	6.38e-09	8.81e-09	2.15e-09	7.05e-10	4.46e-09	1.06e-10	2.73e-09	7.43e-09	2.19e-09
0.07534	4.71e-09	4.65e-09	6.24e-09	6.42e-09	8.89e-09	2.18e-09	7.48e-10	4.48e-09	1.31e-10	2.75e-09	7.46e-09	2.2e-09
0.07578	4.75e-09	4.68e-09	6.26e-09	6.46e-09	8.95e-09	2.2e-09	7.72e-10	4.5e-09	1.11e-10	2.79e-09	7.5e-09	2.2e-09
0.076	4.78e-09	4.69e-09	6.33e-09	6.49e-09	9.01e-09	2.26e-09	7.64e-10	4.53e-09	1.11e-10	2.8e-09	7.54e-09	2.21e-09
0.0764	4.83e-09	4.73e-09	6.36e-09	6.53e-09	9.07e-09	2.3e-09	7.65e-10	4.55e-09	1.3e-10	2.83e-09	7.59e-09	2.22e-09
0.07669	4.85e-09	4.77e-09	6.41e-09	6.57e-09	9.11e-09	2.32e-09	7.86e-10	4.59e-09	1.11e-10	2.86e-09	7.65e-09	2.23e-09
0.07709	4.9e-09	4.8e-09	6.45e-09	6.61e-09	9.14e-09	2.31e-09	7.44e-10	4.62e-09	1.06e-10	2.89e-09	7.71e-09	2.23e-09
0.07731	4.95e-09	4.83e-09	6.52e-09	6.65e-09	9.18e-09	2.32e-09	7.62e-10	4.65e-09	1.1e-10	2.9e-09	7.78e-09	2.24e-09
0.07762	5.01e-09	4.85e-09	6.58e-09	6.67e-09	9.25e-09	2.34e-09	7.86e-10	4.67e-09	1.14e-10	2.91e-09	7.84e-09	2.26e-09
0.07803	5.03e-09	4.9e-09	6.62e-09	6.7e-09	9.31e-09	2.36e-09	7.79e-10	4.68e-09	1.14e-10	2.94e-09	7.89e-09	2.26e-09
0.07828	5.09e-09	4.93e-09	6.67e-09	6.75e-09	9.38e-09	2.37e-09	7.92e-10	4.69e-09	1.08e-10	2.95e-09	7.97e-09	2.28e-09
0.07863	5.12e-09	4.96e-09	6.73e-09	6.79e-09	9.42e-09	2.39e-09	7.58e-10	4.73e-09	1.2e-10	2.97e-09	8.03e-09	2.28e-09
0.07897	5.19e-09	4.98e-09	6.77e-09	6.82e-09	9.49e-09	2.44e-09	8.07e-10	4.77e-09	1.2e-10	2.99e-09	8.07e-09	2.3e-09
0.07935	5.21e-09	5.01e-09	6.82e-09	6.86e-09	9.54e-09	2.45e-09	7.82e-10	4.79e-09	1.1e-10	3e-09	8.11e-09	2.3e-09
0.07963	5.24e-09	5.01e-09	6.86e-09	6.9e-09	9.61e-09	2.48e-09	8.23e-10	4.81e-09	1.1e-10	3e-09	8.15e-09	2.32e-09
0.07997	5.26e-09	5.03e-09	6.89e-09	6.93e-09	9.68e-09	2.52e-09	8.27e-10	4.83e-09	1.16e-10	3.02e-09	8.2e-09	2.32e-09
0.08029	5.27e-09	5.05e-09	6.93e-09	6.96e-09	9.76e-09	2.54e-09	8.56e-10	4.85e-09	9.87e-11	3.04e-09	8.24e-09	2.32e-09

## Sheet: Fig. 6D
Representative I/V step protocol recordings from one cell each. Values are currents in Ampere in response to rectangular pulses to the indicated voltages for the indicated hTMEM206 mutants, transfected into TMEM206 KO cells at pH7.4
	WT										V80C										A81C										R87C										L310C
Voltage (V)	-80 mV	-60 mV	-40 mV	-20 mV	0 mV	20 mV	40 mV	60 mV	80 mV	Voltage (V)	-80 mV	-60 mV	-40 mV	-20 mV	0 mV	20 mV	40 mV	60 mV	80 mV	Voltage (V)	-80 mV	-60 mV	-40 mV	-20 mV	0 mV	20 mV	40 mV	60 mV	80 mV	Voltage (V)	-80 mV	-60 mV	-40 mV	-20 mV	0 mV	20 mV	40 mV	60 mV	80 mV	Voltage (V)	-80 mV	-60 mV	-40 mV	-20 mV	0 mV	20 mV	40 mV	60 mV	80 mV
0.001005	4.00905e-11	2.15699e-11	3.2378e-11	4.62659e-11	4.31827e-11	2.77448e-11	3.546e-11	1.23164e-11	1.07703e-11	0.001005	-1.11e-10	-9.42e-11	-8.96e-11	-9.57e-11	-1.2e-10	-1.16e-10	-1.33e-10	-1.47e-10	-1.25e-10	0.001005	-4.48e-11	-5.71e-11	-8.8e-11	-9.42e-11	-8.8e-11	-8.64e-11	-1.03e-10	-1.25e-10	-1.4e-10	0.001005	-3.09e-10	-3.26e-10	-3.26e-10	-3.46e-10	-3.23e-10	-3.61e-10	-3.61e-10	-3.49e-10	-3.75e-10	0.001005	3.85376e-11	2.6188e-11	3.23633e-11	7.668e-12	4.58481e-12	3.08201e-11	1.07551e-11	3.39061e-11	9.21297e-12
0.00201	-5.55216e-11	-7.71191e-11	-5.24317e-11	-4.3172e-11	-3.70067e-11	-6.63173e-11	-6.16908e-11	-6.94095e-11	-7.86692e-11	0.00201	-2.3e-10	-2.41e-10	-2.21e-10	-2.44e-10	-2.73e-10	-2.73e-10	-2.92e-10	-3.07e-10	-2.78e-10	0.00201	-9.57e-11	-1.08e-10	-1.34e-10	-1.5e-10	-1.39e-10	-1.3e-10	-1.42e-10	-1.53e-10	-1.74e-10	0.00201	-4.83e-10	-5.26e-10	-5.09e-10	-5.23e-10	-5.29e-10	-5.62e-10	-5.49e-10	-5.38e-10	-5.76e-10	0.00201	-8.32833e-11	-1.04884e-10	-9.25418e-11	-1.24946e-10	-1.1878e-10	-9.40829e-11	-1.20318e-10	-9.25413e-11	-1.18772e-10
0.003015	-5.0925e-11	-5.24733e-11	-2.77825e-11	-2.31566e-11	-2.93218e-11	-4.01372e-11	-4.78446e-11	-4.63024e-11	-6.32724e-11	0.003015	-2.08e-10	-2.33e-10	-2.15e-10	-2.38e-10	-2.61e-10	-2.64e-10	-2.67e-10	-2.96e-10	-2.72e-10	0.003015	-8.95e-11	-9.11e-11	-9.72e-11	-1.22e-10	-1.16e-10	-1e-10	-1.08e-10	-1.2e-10	-1.39e-10	0.003015	-3.83e-10	-4.14e-10	-4e-10	-4.11e-10	-4.17e-10	-4.2e-10	-4.48e-10	-4.12e-10	-4.43e-10	0.003015	-5.7106e-11	-7.25439e-11	-6.63663e-11	-9.41431e-11	-9.87724e-11	-6.17398e-11	-9.10571e-11	-6.6368e-11	-8.02575e-11
0.00402	-3.70467e-11	-3.2414e-11	-1.23485e-11	-2.31431e-11	-2.00661e-11	-4.62934e-11	-4.16692e-11	-3.39534e-11	-4.16732e-11	0.00402	-2.07e-10	-2.24e-10	-2.13e-10	-2.31e-10	-2.65e-10	-2.62e-10	-2.67e-10	-2.89e-10	-2.72e-10	0.00402	-8.64e-11	-7.72e-11	-9.11e-11	-1.22e-10	-1.14e-10	-9.41e-11	-9.72e-11	-1.06e-10	-1.28e-10	0.00402	-3.24e-10	-3.86e-10	-3.5e-10	-3.53e-10	-3.83e-10	-3.87e-10	-3.9e-10	-3.67e-10	-3.9e-10	0.00402	-4.32142e-11	-6.63601e-11	-5.40132e-11	-7.09944e-11	-8.488e-11	-5.24649e-11	-7.0995e-11	-5.86431e-11	-6.01903e-11
0.005025	-4.47496e-11	-2.62375e-11	-3.08995e-12	-6.18271e-12	-2.00599e-11	-3.85838e-11	-3.70427e-11	-2.4692e-11	-3.24095e-11	0.005025	-1.94e-10	-2.25e-10	-2.16e-10	-2.16e-10	-2.64e-10	-2.73e-10	-2.45e-10	-2.81e-10	-2.69e-10	0.005025	-7.72e-11	-8.8e-11	-8.18e-11	-1.14e-10	-1.23e-10	-1e-10	-8.95e-11	-1e-10	-1.33e-10	0.005025	-3.29e-10	-3.72e-10	-3.53e-10	-3.43e-10	-3.69e-10	-3.49e-10	-3.86e-10	-3.46e-10	-3.63e-10	0.005025	-3.54955e-11	-5.71009e-11	-3.70439e-11	-5.70992e-11	-6.94511e-11	-2.4706e-11	-6.17285e-11	-4.63047e-11	-4.62979e-11
0.00603	-3.70427e-11	-2.46858e-11	-3.08995e-12	-1.54289e-11	-1.23542e-11	-3.54972e-11	-4.32086e-11	-1.38941e-11	-2.46954e-11	0.00603	-1.94e-10	-2.31e-10	-2.05e-10	-2.25e-10	-2.56e-10	-2.62e-10	-2.45e-10	-2.65e-10	-2.69e-10	0.00603	-8.95e-11	-8.64e-11	-7.56e-11	-1.13e-10	-1.16e-10	-1.05e-10	-9.26e-11	-9.88e-11	-1.11e-10	0.00603	-3.19e-10	-3.58e-10	-3.38e-10	-3.19e-10	-3.55e-10	-3.33e-10	-3.73e-10	-3.41e-10	-3.46e-10	0.00603	-2.77791e-11	-4.62979e-11	-3.39528e-11	-3.70405e-11	-6.32724e-11	-3.39438e-11	-4.47541e-11	-5.09239e-11	-3.08668e-11
0.007035	-4.01214e-11	-4.63604e-12	-1.23412e-11	-1.38918e-11	-2.62308e-11	-3.70343e-11	-4.01231e-11	-1.543e-11	-2.46886e-11	0.007035	-1.88e-10	-2.18e-10	-2.18e-10	-2.19e-10	-2.45e-10	-2.75e-10	-2.42e-10	-2.58e-10	-2.69e-10	0.007035	-9.26e-11	-9.72e-11	-8.18e-11	-1.02e-10	-1.08e-10	-1.1e-10	-8.95e-11	-1e-10	-1.02e-10	0.007035	-3.26e-10	-3.47e-10	-3.32e-10	-3.07e-10	-3.72e-10	-3.32e-10	-3.78e-10	-3.55e-10	-3.44e-10	0.007035	-2.00661e-11	-3.39556e-11	-3.24112e-11	-2.16082e-11	-5.09329e-11	-2.00717e-11	-2.46976e-11	-4.32159e-11	-1.85245e-11
0.00804	-3.24084e-11	-1.54216e-12	-7.72036e-12	-1.852e-11	-2.62358e-11	-2.62381e-11	-3.08696e-11	-9.25914e-12	-1.38918e-11	0.00804	-1.82e-10	-2.19e-10	-2.16e-10	-2.18e-10	-2.42e-10	-2.73e-10	-2.48e-10	-2.56e-10	-2.73e-10	0.00804	-8.64e-11	-1.03e-10	-8.33e-11	-9.41e-11	-1.13e-10	-1.06e-10	-9.72e-11	-9.26e-11	-1.13e-10	0.00804	-3.35e-10	-3.33e-10	-3.3e-10	-3.13e-10	-3.69e-10	-3.36e-10	-3.43e-10	-3.47e-10	-3.44e-10	0.00804	-2.1606e-11	-3.08578e-11	-3.70371e-11	-1.23474e-11	-5.09227e-11	-3.08567e-11	-1.85211e-11	-4.6294e-11	-2.00559e-11
0.009045	-2.31515e-11	4.62309e-12	-1.38845e-11	-2.46903e-11	-2.62369e-11	-2.16077e-11	-3.2405e-11	-1.54666e-12	-9.25801e-12	0.009045	-1.84e-10	-2.11e-10	-2.3e-10	-2.25e-10	-2.35e-10	-2.67e-10	-2.42e-10	-2.55e-10	-2.67e-10	0.009045	-1.08e-10	-1.05e-10	-6.95e-11	-7.56e-11	-1.16e-10	-1.17e-10	-1.02e-10	-9.72e-11	-1e-10	0.009045	-3.35e-10	-3.46e-10	-3.47e-10	-3.1e-10	-3.77e-10	-3.32e-10	-3.43e-10	-3.49e-10	-3.35e-10	0.009045	-2.31442e-11	-6.17876e-12	-3.7036e-11	-6.17539e-12	-3.54983e-11	-1.69863e-11	-1.69716e-11	-3.70422e-11	-3.09501e-12
0.01005	-2.00638e-11	-7.70516e-12	-6.17989e-12	-2.4692e-11	-2.93201e-11	-2.16032e-11	-2.31498e-11	-3.08882e-12	-6.19332e-15	0.01005	-1.85e-10	-2.05e-10	-2.16e-10	-2.21e-10	-2.25e-10	-2.58e-10	-2.47e-10	-2.44e-10	-2.65e-10	0.01005	-1.02e-10	-9.88e-11	-7.87e-11	-7.87e-11	-1.05e-10	-1.14e-10	-9.72e-11	-9.72e-11	-9.57e-11	0.01005	-3.29e-10	-3.4e-10	-3.46e-10	-3.24e-10	-3.73e-10	-3.29e-10	-3.4e-10	-3.64e-10	-3.29e-10	0.01005	-1.0812e-11	3.08037e-12	-2.9323e-11	-6.17257e-12	-2.77757e-11	-3.08572e-11	-3.09276e-12	-3.70354e-11	-9.25914e-12
0.011055	-2.00621e-11	1.07912e-11	-1.69761e-11	-2.31538e-11	-2.62369e-11	-1.38918e-11	-1.54368e-11	-1.07985e-11	-7.71529e-12	0.011055	-1.85e-10	-1.96e-10	-2.24e-10	-2.35e-10	-2.25e-10	-2.58e-10	-2.44e-10	-2.39e-10	-2.67e-10	0.011055	-9.11e-11	-1e-10	-8.8e-11	-9.41e-11	-1.05e-10	-1.13e-10	-1e-10	-9.88e-11	-1.02e-10	0.011055	-3.43e-10	-3.3e-10	-3.41e-10	-3.35e-10	-3.77e-10	-3.24e-10	-3.21e-10	-3.63e-10	-3.33e-10	0.011055	-2.3147e-11	-4.62366e-12	-2.31504e-11	-4.62929e-12	-1.08075e-11	-2.16099e-11	-6.16807e-12	-2.77808e-11	-1.38896e-11
0.01206	-1.85171e-11	-3.08319e-12	-2.77712e-11	-3.39511e-11	-2.62381e-11	-1.2344e-11	-1.85132e-11	-6.17651e-12	-1.2344e-11	0.01206	-1.87e-10	-1.84e-10	-2.25e-10	-2.31e-10	-2.11e-10	-2.44e-10	-2.42e-10	-2.36e-10	-2.53e-10	0.01206	-9.26e-11	-1.08e-10	-8.18e-11	-7.72e-11	-9.57e-11	-1.13e-10	-1.1e-10	-1.03e-10	-9.11e-11	0.01206	-3.38e-10	-3.26e-10	-3.44e-10	-3.38e-10	-3.8e-10	-3.16e-10	-3.16e-10	-3.73e-10	-3.44e-10	0.01206	-2.93139e-11	4.6276e-12	-2.00644e-11	-1.5461e-12	-6.17257e-12	-2.31476e-11	4.62872e-12	-2.31487e-11	-1.85183e-11
0.013065	-1.08024e-11	-7.71304e-12	-1.69846e-11	-4.16625e-11	-3.2409e-11	-4.63267e-12	-4.63379e-12	-1.08024e-11	-1.08007e-11	0.013065	-1.85e-10	-1.81e-10	-2.21e-10	-2.33e-10	-2.16e-10	-2.44e-10	-2.59e-10	-2.38e-10	-2.47e-10	0.013065	-8.95e-11	-1.03e-10	-9.41e-11	-7.72e-11	-9.11e-11	-1.1e-10	-1.14e-10	-1e-10	-9.11e-11	0.013065	-3.52e-10	-3.13e-10	-3.63e-10	-3.35e-10	-3.61e-10	-3.32e-10	-3.13e-10	-3.66e-10	-3.49e-10	0.013065	-1.23508e-11	7.71754e-12	-2.1602e-11	-6.16807e-12	0	-2.00649e-11	1.23429e-11	-1.69756e-11	-2.0061e-11
0.01407	-1.54722e-12	-3.08826e-12	-2.93196e-11	-3.24095e-11	-3.8572e-11	-4.62704e-12	-1.54441e-12	-1.38901e-11	-3.09276e-12	0.01407	-1.87e-10	-1.77e-10	-2.15e-10	-2.33e-10	-2.07e-10	-2.31e-10	-2.48e-10	-2.3e-10	-2.44e-10	0.01407	-8.49e-11	-1.02e-10	-1.08e-10	-7.72e-11	-8.8e-11	-1.2e-10	-1.16e-10	-1.06e-10	-9.72e-11	0.01407	-3.53e-10	-3.09e-10	-3.64e-10	-3.4e-10	-3.56e-10	-3.44e-10	-3.18e-10	-3.72e-10	-3.6e-10	0.01407	-7.71585e-12	1.3889e-11	-1.23451e-11	3.0815e-12	6.17088e-12	-2.31447e-11	1.08058e-11	-9.26477e-12	-1.69722e-11
0.015075	-3.08431e-12	-3.0922e-12	-3.39472e-11	-2.46959e-11	-1.69857e-11	3.0815e-12	-1.53934e-12	-1.85177e-11	-1.23474e-11	0.015075	-1.96e-10	-1.71e-10	-2.08e-10	-2.24e-10	-2.05e-10	-2.33e-10	-2.56e-10	-2.24e-10	-2.33e-10	0.015075	-7.87e-11	-9.26e-11	-1.06e-10	-8.18e-11	-8.49e-11	-1.02e-10	-1.16e-10	-1.19e-10	-1.02e-10	0.015075	-3.44e-10	-3.13e-10	-3.7e-10	-3.4e-10	-3.4e-10	-3.41e-10	-3.21e-10	-3.6e-10	-3.49e-10	0.015075	-1.54554e-12	1.8516e-11	-7.8824e-15	-1.54216e-12	6.17257e-12	-1.38896e-11	1.69722e-11	-1.54238e-11	-3.09726e-12
0.01608	1.54328e-12	-1.8516e-11	-2.4697e-11	-2.62291e-11	-2.16015e-11	-3.08375e-12	9.25069e-12	-1.85222e-11	-2.46908e-11	0.01608	-1.88e-10	-1.71e-10	-2.07e-10	-2.18e-10	-2.04e-10	-2.22e-10	-2.56e-10	-2.38e-10	-2.24e-10	0.01608	-7.72e-11	-8.8e-11	-1.13e-10	-8.33e-11	-8.33e-11	-8.33e-11	-1.16e-10	-1.2e-10	-1.1e-10	0.01608	-3.55e-10	-3.23e-10	-3.61e-10	-3.43e-10	-3.32e-10	-3.56e-10	-3.21e-10	-3.53e-10	-3.63e-10	0.01608	-1.54385e-12	1.38896e-11	-9.25351e-12	-3.09051e-12	4.63098e-12	-4.62985e-12	1.2348e-11	3.08206e-12	-1.85171e-11
0.017085	6.17088e-12	-2.46886e-11	-2.77774e-11	-9.26364e-12	-1.38901e-11	-1.54441e-12	-4.62591e-12	-2.62381e-11	-3.24033e-11	0.017085	-1.99e-10	-1.74e-10	-1.96e-10	-2.19e-10	-1.96e-10	-2.22e-10	-2.62e-10	-2.36e-10	-2.21e-10	0.017085	-6.95e-11	-8.8e-11	-1.06e-10	-8.95e-11	-7.41e-11	-8.95e-11	-1.14e-10	-1.19e-10	-1.14e-10	0.017085	-3.43e-10	-3.19e-10	-3.61e-10	-3.5e-10	-3.38e-10	-3.44e-10	-3.21e-10	-3.58e-10	-3.64e-10	0.017085	-3.07868e-12	9.2642e-12	-1.54159e-12	-1.54266e-11	6.17201e-12	4.62478e-12	1.23412e-11	9.25914e-12	-2.77707e-11
0.01809	4.6321e-12	-2.00666e-11	-2.62336e-11	-3.08431e-12	-7.71642e-12	-3.08319e-12	-7.71248e-12	-4.01164e-11	-2.47027e-11	0.01809	-1.98e-10	-1.71e-10	-1.84e-10	-2.11e-10	-2.07e-10	-2.21e-10	-2.45e-10	-2.42e-10	-2.16e-10	0.01809	-6.94e-11	-7.41e-11	-1.03e-10	-1.1e-10	-8.18e-11	-8.8e-11	-1.06e-10	-1.22e-10	-1.11e-10	0.01809	-3.49e-10	-3.24e-10	-3.5e-10	-3.56e-10	-3.24e-10	-3.66e-10	-3.35e-10	-3.47e-10	-3.77e-10	0.01809	1.69671e-11	1.69711e-11	1.07974e-11	-1.08097e-11	4.63041e-12	2.25211e-15	-1.53822e-12	1.38845e-11	-1.38957e-11
0.019095	9.25407e-12	-2.6233e-11	-1.85217e-11	9.25126e-12	-1.5461e-12	4.62084e-12	-2.81514e-15	-2.93275e-11	-4.4744e-11	0.019095	-1.91e-10	-1.77e-10	-1.79e-10	-2.07e-10	-1.98e-10	-2.11e-10	-2.38e-10	-2.45e-10	-2.19e-10	0.019095	-6.64e-11	-6.79e-11	-1.11e-10	-1.05e-10	-8.8e-11	-8.8e-11	-1.1e-10	-1.17e-10	-1.1e-10	0.019095	-3.29e-10	-3.21e-10	-3.4e-10	-3.55e-10	-3.4e-10	-3.66e-10	-3.35e-10	-3.46e-10	-3.83e-10	0.019095	1.23496e-11	1.08002e-11	7.72036e-12	-2.46858e-11	4.62985e-12	1.54779e-12	-1.54554e-12	4.63604e-12	-1.69716e-11
0.0201	-1.54216e-12	-2.46965e-11	-1.69767e-11	-1.53822e-12	-3.08319e-12	-1.23384e-11	-4.50423e-15	-3.24061e-11	-3.39567e-11	0.0201	-1.91e-10	-1.74e-10	-1.74e-10	-1.99e-10	-2.11e-10	-2.19e-10	-2.35e-10	-2.44e-10	-2.21e-10	0.0201	-6.94e-11	-7.25e-11	-1e-10	-1e-10	-9.11e-11	-8.03e-11	-1.03e-10	-1.22e-10	-1.19e-10	0.0201	-3.33e-10	-3.3e-10	-3.32e-10	-3.56e-10	-3.44e-10	-3.63e-10	-3.27e-10	-3.38e-10	-3.89e-10	0.0201	1.69739e-11	-3.08094e-12	1.54295e-11	-2.00621e-11	4.62535e-12	1.54272e-11	-7.71248e-12	1.23412e-11	-7.71867e-12
0.021105	-9.25576e-12	-3.39415e-11	-1.69733e-11	1.54385e-12	4.62591e-12	-7.72148e-12	-1.23429e-11	-2.77814e-11	-3.54938e-11	0.021105	-1.85e-10	-1.79e-10	-1.71e-10	-1.99e-10	-2.1e-10	-2.16e-10	-2.31e-10	-2.53e-10	-2.22e-10	0.021105	-6.33e-11	-6.33e-11	-9.26e-11	-1.05e-10	-8.95e-11	-7.1e-11	-1.02e-10	-1.08e-10	-1.27e-10	0.021105	-3.29e-10	-3.4e-10	-3.32e-10	-3.47e-10	-3.27e-10	-3.69e-10	-3.49e-10	-3.29e-10	-3.72e-10	0.021105	1.5434e-11	-1.5461e-12	1.38912e-11	-1.38946e-11	-7.71248e-12	1.38912e-11	-3.0922e-12	6.17595e-12	-4.63323e-12
0.02211	-6.17708e-12	-1.38991e-11	-9.25745e-12	6.16919e-12	1.55004e-12	-1.6975e-11	-1.54334e-11	-2.93196e-11	-3.24073e-11	0.02211	-1.76e-10	-1.87e-10	-1.74e-10	-1.85e-10	-2.13e-10	-2.19e-10	-2.22e-10	-2.45e-10	-2.3e-10	0.02211	-6.64e-11	-7.1e-11	-9.26e-11	-1.1e-10	-1e-10	-8.64e-11	-9.72e-11	-1.19e-10	-1.28e-10	0.02211	-2.98e-10	-3.58e-10	-3.32e-10	-3.46e-10	-3.36e-10	-3.61e-10	-3.67e-10	-3.09e-10	-3.69e-10	0.02211	1.6975e-11	-7.71529e-12	1.69722e-11	-2.15992e-11	-9.25689e-12	1.69772e-11	-1.38828e-11	7.71642e-12	-1.0794e-11
0.023115	-1.3889e-11	-2.00621e-11	4.62309e-12	1.12606e-15	1.69609e-11	-2.31464e-11	-2.00632e-11	-2.31498e-11	-2.46948e-11	0.023115	-1.65e-10	-1.94e-10	-1.71e-10	-1.93e-10	-2.16e-10	-2.18e-10	-2.21e-10	-2.36e-10	-2.21e-10	0.023115	-7.25e-11	-6.02e-11	-8.8e-11	-1.11e-10	-9.88e-11	-8.8e-11	-8.18e-11	-1.05e-10	-1.25e-10	0.023115	-3.07e-10	-3.46e-10	-3.09e-10	-3.41e-10	-3.43e-10	-3.41e-10	-3.69e-10	-3.21e-10	-3.57e-10	0.023115	1.54357e-11	-1.0803e-11	9.2642e-12	-1.08092e-11	-3.09389e-12	2.31447e-11	-6.17708e-12	9.2597e-12	7.70854e-12
0.02412	-2.0061e-11	-2.46841e-11	5.06726e-15	-3.086e-12	-9.25013e-12	-2.16077e-11	-2.62324e-11	-1.85155e-11	-2.31476e-11	0.02412	-1.65e-10	-1.87e-10	-1.71e-10	-1.87e-10	-2.28e-10	-2.24e-10	-2.16e-10	-2.41e-10	-2.21e-10	0.02412	-7.25e-11	-7.1e-11	-8.02e-11	-1.08e-10	-1.06e-10	-8.95e-11	-8.64e-11	-1e-10	-1.14e-10	0.02412	-3.02e-10	-3.55e-10	-3.06e-10	-3.32e-10	-3.43e-10	-3.23e-10	-3.61e-10	-3.27e-10	-3.6e-10	0.02412	2.15981e-11	-1.38884e-11	1.38884e-11	-1.69677e-11	-1.69694e-11	1.69767e-11	-9.25576e-12	1.08007e-11	4.6321e-12
0.025125	-2.16099e-11	-6.18102e-12	9.25745e-12	-4.6276e-12	-9.26083e-12	-2.46925e-11	-2.31509e-11	-3.09389e-12	-1.69716e-11	0.025125	-1.64e-10	-1.87e-10	-1.73e-10	-1.87e-10	-2.15e-10	-2.24e-10	-2.15e-10	-2.33e-10	-2.31e-10	0.025125	-7.72e-11	-6.79e-11	-6.95e-11	-1e-10	-1.03e-10	-9.11e-11	-9.1e-11	-9.88e-11	-1.23e-10	0.025125	-3.06e-10	-3.55e-10	-3.12e-10	-3.27e-10	-3.46e-10	-3.3e-10	-3.78e-10	-3.23e-10	-3.53e-10	0.025125	6.17989e-12	-1.38862e-11	1.54283e-11	-5.63029e-15	-1.23496e-11	1.23485e-11	-1.54666e-12	6.16976e-12	7.71811e-12
0.02613	-3.39415e-11	-9.25576e-12	1.23423e-11	-3.9412e-15	-1.23446e-11	-2.7778e-11	-2.46965e-11	-7.71022e-12	1.53202e-12	0.02613	-1.51e-10	-1.88e-10	-1.71e-10	-1.94e-10	-2.11e-10	-2.28e-10	-2.11e-10	-2.38e-10	-2.27e-10	0.02613	-9.11e-11	-8.33e-11	-7.41e-11	-8.64e-11	-1.14e-10	-1.03e-10	-8.49e-11	-8.8e-11	-1.08e-10	0.02613	-3.1e-10	-3.49e-10	-3.29e-10	-3.19e-10	-3.61e-10	-3.35e-10	-3.61e-10	-3.24e-10	-3.46e-10	0.02613	9.25745e-12	-4.63492e-12	4.63154e-12	1.54159e-12	-1.69694e-11	1.38907e-11	-3.08319e-12	-7.71079e-12	1.543e-11
0.027135	-1.69863e-11	-1.54441e-12	4.63379e-12	-6.17032e-12	-1.08064e-11	-2.77802e-11	-3.70332e-11	4.62591e-12	-1.07945e-11	0.027135	-1.51e-10	-1.88e-10	-1.81e-10	-1.9e-10	-2.13e-10	-2.3e-10	-2.08e-10	-2.22e-10	-2.28e-10	0.027135	-9.88e-11	-9.41e-11	-7.56e-11	-9.1e-11	-1.13e-10	-1.02e-10	-1.06e-10	-8.03e-11	-1.05e-10	0.027135	-3.32e-10	-3.5e-10	-3.12e-10	-3.16e-10	-3.61e-10	-3.16e-10	-3.61e-10	-3.36e-10	-3.41e-10	0.027135	6.17426e-12	-9.25689e-12	-1.53991e-12	-1.54103e-12	-3.09107e-12	1.85177e-11	4.62872e-12	-6.17539e-12	1.5434e-11
0.02814	-2.77712e-11	3.08488e-12	7.71304e-12	-4.63548e-12	-1.85188e-11	-3.08578e-11	-3.39489e-11	6.17201e-12	-2.25211e-15	0.02814	-1.45e-10	-1.79e-10	-1.79e-10	-1.9e-10	-2.07e-10	-2.35e-10	-2.04e-10	-2.16e-10	-2.31e-10	0.02814	-9.88e-11	-8.95e-11	-7.25e-11	-8.49e-11	-1.14e-10	-1.08e-10	-9.11e-11	-9.57e-11	-9.57e-11	0.02814	-3.13e-10	-3.26e-10	-3.23e-10	-3.23e-10	-3.64e-10	-3.06e-10	-3.53e-10	-3.46e-10	-3.29e-10	0.02814	6.17201e-12	-6.17032e-12	1.53765e-12	1.54722e-12	-1.54385e-12	1.85138e-11	9.26026e-12	-1.08013e-11	1.8516e-11
0.029145	-1.69806e-11	3.08431e-12	1.54272e-12	-1.85138e-11	-2.46869e-11	-1.23542e-11	-2.1611e-11	4.62872e-12	4.62647e-12	0.029145	-1.57e-10	-1.77e-10	-1.87e-10	-1.82e-10	-2.02e-10	-2.22e-10	-2.08e-10	-2.18e-10	-2.36e-10	0.029145	-9.11e-11	-9.72e-11	-7.41e-11	-8.03e-11	-1.14e-10	-1.1e-10	-8.8e-11	-8.33e-11	-9.41e-11	0.029145	-3.16e-10	-3.41e-10	-3.27e-10	-3.19e-10	-3.72e-10	-3.13e-10	-3.47e-10	-3.43e-10	-3.43e-10	0.029145	3.086e-12	4.6276e-12	-1.07996e-11	1.54244e-11	-1.53878e-12	3.09051e-12	1.54328e-11	-1.0799e-11	1.23457e-11
0.03015	-1.85188e-11	-3.08037e-12	-6.16976e-12	-1.6975e-11	-1.54418e-11	-1.543e-11	-2.31464e-11	3.37817e-15	1.12606e-15	0.03015	-1.48e-10	-1.73e-10	-1.85e-10	-1.96e-10	-1.88e-10	-2.22e-10	-2.05e-10	-2.05e-10	-2.25e-10	0.03015	-1.06e-10	-9.26e-11	-8.02e-11	-8.33e-11	-1e-10	-1.17e-10	-9.72e-11	-8.95e-11	-8.64e-11	0.03015	-3.33e-10	-3.35e-10	-3.41e-10	-3.04e-10	-3.72e-10	-3.15e-10	-3.46e-10	-3.53e-10	-3.44e-10	0.03015	-1.54159e-12	9.26083e-12	-1.38873e-11	6.18045e-12	1.08013e-11	-1.54216e-12	2.16009e-11	-7.8824e-15	4.63267e-12
0.031155	-1.85166e-11	7.70854e-12	-4.63435e-12	-1.23508e-11	-3.08589e-11	-1.08024e-11	-1.69761e-11	4.62309e-12	-1.54385e-12	0.031155	-1.51e-10	-1.62e-10	-1.98e-10	-1.98e-10	-1.81e-10	-2.15e-10	-2.08e-10	-2.08e-10	-2.28e-10	0.031155	-9.72e-11	-1.03e-10	-8.18e-11	-7.56e-11	-9.72e-11	-1.13e-10	-1.11e-10	-1.02e-10	-9.41e-11	0.031155	-3.35e-10	-3.29e-10	-3.27e-10	-3.3e-10	-3.67e-10	-3.21e-10	-3.24e-10	-3.52e-10	-3.26e-10	0.031155	-1.54666e-12	1.6975e-11	-1.08007e-11	1.69677e-11	1.85155e-11	-3.08826e-12	1.38935e-11	-1.07974e-11	4.62816e-12
0.03216	-1.0803e-11	-3.07981e-12	-1.54317e-11	-2.00621e-11	-2.77819e-11	-4.63323e-12	-1.0803e-11	-9.25632e-12	-4.62816e-12	0.03216	-1.57e-10	-1.61e-10	-1.85e-10	-1.99e-10	-1.79e-10	-2.04e-10	-2.21e-10	-1.98e-10	-2.16e-10	0.03216	-8.95e-11	-9.41e-11	-9.1e-11	-7.72e-11	-9.41e-11	-1.1e-10	-1.23e-10	-9.88e-11	-8.8e-11	0.03216	-3.46e-10	-3.13e-10	-3.52e-10	-3.35e-10	-3.73e-10	-3.35e-10	-3.29e-10	-3.64e-10	-3.43e-10	0.03216	-1.07957e-11	2.16032e-11	-1.54497e-12	4.63773e-12	1.5434e-11	-9.25914e-12	1.69772e-11	-6.17539e-12	5.63029e-16
0.033165	-3.08657e-12	4.62028e-12	-2.31498e-11	-2.62324e-11	-3.24033e-11	-7.71304e-12	-4.6321e-12	-1.38896e-11	-3.08938e-12	0.033165	-1.61e-10	-1.59e-10	-1.85e-10	-1.99e-10	-1.85e-10	-2.07e-10	-2.21e-10	-1.99e-10	-2.16e-10	0.033165	-8.49e-11	-1.02e-10	-8.8e-11	-8.18e-11	-9.41e-11	-1.06e-10	-1.13e-10	-9.57e-11	-9.72e-11	0.033165	-3.53e-10	-3.24e-10	-3.55e-10	-3.3e-10	-3.66e-10	-3.4e-10	-3.29e-10	-3.69e-10	-3.41e-10	0.033165	-4.50423e-15	1.85228e-11	3.08319e-12	1.38834e-11	1.54323e-11	-1.38862e-11	2.31487e-11	-7.71079e-12	-3.08826e-12
0.03417	4.62422e-12	-1.38811e-11	-3.24033e-11	-2.31476e-11	-2.1606e-11	-1.54047e-12	-4.6321e-12	-1.85166e-11	-9.25689e-12	0.03417	-1.62e-10	-1.48e-10	-1.88e-10	-1.98e-10	-1.73e-10	-1.98e-10	-2.19e-10	-2.08e-10	-1.98e-10	0.03417	-8.03e-11	-8.8e-11	-9.72e-11	-8.18e-11	-8.64e-11	-1.05e-10	-1.19e-10	-1.05e-10	-9.41e-11	0.03417	-3.64e-10	-3.21e-10	-3.66e-10	-3.32e-10	-3.6e-10	-3.33e-10	-3.24e-10	-3.81e-10	-3.53e-10	0.03417	-1.53596e-12	2.46886e-11	-1.54103e-12	6.17539e-12	1.38941e-11	-9.26083e-12	2.77729e-11	6.16807e-12	-1.07985e-11
0.035175	-3.07812e-12	-9.26533e-12	-2.62403e-11	-1.54373e-11	-1.08114e-11	1.23356e-11	-1.07934e-11	-1.5439e-11	-7.72205e-12	0.035175	-1.64e-10	-1.51e-10	-1.71e-10	-1.98e-10	-1.64e-10	-1.93e-10	-2.28e-10	-2.04e-10	-1.94e-10	0.035175	-8.02e-11	-9.41e-11	-1.06e-10	-7.56e-11	-8.18e-11	-9.72e-11	-1.19e-10	-1.14e-10	-1e-10	0.035175	-3.72e-10	-3.18e-10	-3.55e-10	-3.35e-10	-3.52e-10	-3.53e-10	-3.23e-10	-3.63e-10	-3.61e-10	0.035175	1.69649e-11	2.00644e-11	2.81514e-15	4.62647e-12	2.46852e-11	-7.71304e-12	1.54402e-11	6.17651e-12	-6.17651e-12
0.03618	1.23401e-11	-2.00582e-11	-3.24028e-11	-2.00599e-11	-2.31391e-11	-3.07981e-12	9.25126e-12	-2.93145e-11	-2.16015e-11	0.03618	-1.65e-10	-1.57e-10	-1.65e-10	-1.96e-10	-1.81e-10	-1.84e-10	-2.24e-10	-2.08e-10	-1.91e-10	0.03618	-7.72e-11	-8.64e-11	-9.72e-11	-8.95e-11	-8.03e-11	-9.41e-11	-1.19e-10	-1.1e-10	-1.06e-10	0.03618	-3.55e-10	-3.16e-10	-3.56e-10	-3.47e-10	-3.46e-10	-3.43e-10	-3.15e-10	-3.49e-10	-3.7e-10	0.03618	4.63661e-12	2.0061e-11	9.25745e-12	-6.17313e-12	1.54368e-11	3.08375e-12	2.31436e-11	1.54255e-11	-1.08024e-11
0.037185	1.0803e-11	-1.85177e-11	-2.1615e-11	-1.69722e-11	-7.72261e-12	-5.63029e-16	6.1737e-12	-2.16116e-11	-2.31504e-11	0.037185	-1.7e-10	-1.47e-10	-1.71e-10	-1.99e-10	-1.7e-10	-1.88e-10	-2.24e-10	-2.15e-10	-1.99e-10	0.037185	-7.1e-11	-7.25e-11	-1.08e-10	-8.95e-11	-8.18e-11	-8.03e-11	-1.14e-10	-1.16e-10	-1.13e-10	0.037185	-3.64e-10	-3.29e-10	-3.6e-10	-3.6e-10	-3.41e-10	-3.47e-10	-3.33e-10	-3.55e-10	-3.84e-10	0.037185	1.08024e-11	1.54351e-11	1.23474e-11	-1.69722e-11	1.69761e-11	6.17144e-12	1.54351e-11	4.63717e-12	-1.38873e-11
0.03819	9.2597e-12	-1.23519e-11	-3.54814e-11	-3.08882e-12	-9.25632e-12	1.53991e-12	4.62816e-12	-2.93213e-11	-2.77774e-11	0.03819	-1.7e-10	-1.4e-10	-1.62e-10	-1.9e-10	-1.79e-10	-1.84e-10	-2.24e-10	-2.16e-10	-1.81e-10	0.03819	-7.25e-11	-8.02e-11	-1.03e-10	-1.02e-10	-7.72e-11	-8.18e-11	-1.11e-10	-1.11e-10	-1.13e-10	0.03819	-3.56e-10	-3.33e-10	-3.41e-10	-3.55e-10	-3.36e-10	-3.55e-10	-3.36e-10	-3.53e-10	-3.8e-10	0.03819	1.54334e-11	1.69756e-11	1.85171e-11	-1.69767e-11	1.85177e-11	4.63323e-12	1.38879e-11	1.38867e-11	-1.0799e-11
0.039195	7.7136e-12	-2.16065e-11	-1.08154e-11	4.62535e-12	-1.54497e-12	-6.17201e-12	-1.54159e-12	-3.395e-11	-2.77797e-11	0.039195	-1.57e-10	-1.6e-10	-1.64e-10	-1.82e-10	-1.76e-10	-1.84e-10	-2.22e-10	-2.21e-10	-1.81e-10	0.039195	-6.02e-11	-7.56e-11	-1.08e-10	-1.08e-10	-7.72e-11	-8.8e-11	-1.11e-10	-1.19e-10	-1.1e-10	0.039195	-3.33e-10	-3.38e-10	-3.38e-10	-3.52e-10	-3.46e-10	-3.63e-10	-3.36e-10	-3.38e-10	-3.78e-10	0.039195	2.1606e-11	1.69716e-11	1.85222e-11	-1.85166e-11	1.54334e-11	1.23457e-11	7.7198e-12	1.54334e-11	3.07756e-12
0.0402	-1.54441e-12	-3.23999e-11	-2.00559e-11	0	1.54385e-12	-1.08019e-11	-3.08826e-12	-3.24067e-11	-2.93213e-11	0.0402	-1.68e-10	-1.61e-10	-1.56e-10	-1.74e-10	-1.79e-10	-1.82e-10	-2.1e-10	-2.21e-10	-1.93e-10	0.0402	-6.17e-11	-6.48e-11	-1e-10	-1e-10	-8.49e-11	-8.8e-11	-9.88e-11	-1.11e-10	-1.31e-10	0.0402	-3.23e-10	-3.43e-10	-3.43e-10	-3.49e-10	-3.23e-10	-3.49e-10	-3.49e-10	-3.41e-10	-3.66e-10	0.0402	2.77763e-11	4.63435e-12	2.62336e-11	-1.23496e-11	1.38839e-11	1.852e-11	1.0799e-11	1.85188e-11	-7.70966e-12
0.041205	-1.38839e-11	-1.85273e-11	-1.08047e-11	-4.62478e-12	6.17144e-12	-1.23485e-11	-9.25857e-12	-2.46965e-11	-2.77785e-11	0.041205	-1.54e-10	-1.7e-10	-1.44e-10	-1.7e-10	-1.82e-10	-1.87e-10	-2.07e-10	-2.22e-10	-1.91e-10	0.041205	-6.02e-11	-6.48e-11	-9.88e-11	-1.1e-10	-7.87e-11	-7.72e-11	-9.57e-11	-1.14e-10	-1.2e-10	0.041205	-3.09e-10	-3.5e-10	-3.32e-10	-3.49e-10	-3.29e-10	-3.6e-10	-3.52e-10	-3.4e-10	-3.77e-10	0.041205	2.6233e-11	4.62872e-12	2.7778e-11	-1.5434e-11	-3.07981e-12	2.62313e-11	3.086e-12	2.00604e-11	-2.25211e-15
0.04221	-1.08052e-11	-2.62324e-11	-6.16976e-12	4.62704e-12	6.17313e-12	-2.00621e-11	-1.23485e-11	-2.7774e-11	-2.46903e-11	0.04221	-1.51e-10	-1.68e-10	-1.48e-10	-1.74e-10	-1.87e-10	-1.85e-10	-1.99e-10	-2.24e-10	-1.87e-10	0.04221	-6.33e-11	-7.25e-11	-9.72e-11	-1.06e-10	-9.41e-11	-8.18e-11	-9.11e-11	-1.06e-10	-1.22e-10	0.04221	-3.16e-10	-3.47e-10	-3.35e-10	-3.29e-10	-3.32e-10	-3.47e-10	-3.67e-10	-3.4e-10	-3.61e-10	0.04221	1.69812e-11	1.54272e-12	2.62353e-11	-2.15992e-11	-1.54385e-12	2.16088e-11	-6.1675e-12	1.54357e-11	1.54441e-12
0.043215	-1.38929e-11	-2.4692e-11	7.70797e-12	6.17088e-12	6.17088e-12	-2.6233e-11	-2.16043e-11	-1.69784e-11	-1.54379e-11	0.043215	-1.47e-10	-1.7e-10	-1.54e-10	-1.64e-10	-1.88e-10	-1.88e-10	-1.96e-10	-2.35e-10	-1.91e-10	0.043215	-7.41e-11	-7.87e-11	-8.18e-11	-1.1e-10	-9.88e-11	-8.64e-11	-9.11e-11	-1.03e-10	-1.22e-10	0.043215	-3.12e-10	-3.49e-10	-3.24e-10	-3.38e-10	-3.26e-10	-3.47e-10	-3.61e-10	-3.29e-10	-3.5e-10	0.043215	2.16048e-11	-3.08713e-12	2.31481e-11	-9.26533e-12	-1.54666e-12	2.46886e-11	-4.50423e-15	1.85149e-11	6.17482e-12
0.04422	-2.62296e-11	-2.16026e-11	-1.53709e-12	1.54497e-12	-2.81514e-15	-2.4697e-11	-2.62336e-11	-1.23423e-11	-2.00576e-11	0.04422	-1.39e-10	-1.74e-10	-1.47e-10	-1.67e-10	-1.93e-10	-1.96e-10	-1.91e-10	-2.21e-10	-2.05e-10	0.04422	-8.18e-11	-8.18e-11	-8.33e-11	-1.11e-10	-1.06e-10	-9.26e-11	-8.33e-11	-9.26e-11	-1.16e-10	0.04422	-3.01e-10	-3.6e-10	-3.4e-10	-3.3e-10	-3.32e-10	-3.58e-10	-3.57e-10	-3.36e-10	-3.55e-10	0.04422	2.31487e-11	-9.25689e-12	1.69772e-11	-1.23412e-11	-1.08035e-11	1.69806e-11	-6.17088e-12	9.26477e-12	1.54295e-11
0.045225	-2.16088e-11	-9.26364e-12	6.17201e-12	1.54216e-12	-1.38839e-11	-3.54888e-11	-2.46965e-11	3.07643e-12	-1.08069e-11	0.045225	-1.33e-10	-1.7e-10	-1.5e-10	-1.62e-10	-1.91e-10	-1.99e-10	-1.79e-10	-2.16e-10	-2.04e-10	0.045225	-8.64e-11	-6.79e-11	-6.64e-11	-9.57e-11	-1e-10	-9.41e-11	-8.33e-11	-9.88e-11	-1.1e-10	0.045225	-3.09e-10	-3.61e-10	-3.47e-10	-3.16e-10	-3.4e-10	-3.36e-10	-3.56e-10	-3.35e-10	-3.52e-10	0.045225	2.31436e-11	-7.7136e-12	1.38918e-11	-1.54722e-12	-2.16003e-11	2.15992e-11	-6.16863e-12	1.38822e-11	1.543e-11
0.04623	-2.46914e-11	-7.71698e-12	1.07974e-11	-1.54554e-12	-1.23446e-11	-2.77819e-11	-3.39522e-11	-9.249e-12	-1.23418e-11	0.04623	-1.33e-10	-1.68e-10	-1.5e-10	-1.7e-10	-1.88e-10	-1.94e-10	-1.85e-10	-2.07e-10	-2.02e-10	0.04623	-9.26e-11	-8.49e-11	-7.41e-11	-9.57e-11	-1.08e-10	-9.88e-11	-8.49e-11	-8.18e-11	-1.1e-10	0.04623	-3.1e-10	-3.44e-10	-3.36e-10	-3.1e-10	-3.49e-10	-3.24e-10	-3.53e-10	-3.44e-10	-3.4e-10	0.04623	7.72205e-12	1.54159e-12	1.69744e-11	-1.54047e-12	-1.69739e-11	7.72205e-12	6.17088e-12	-1.53765e-12	7.72148e-12
0.047235	-2.46925e-11	-7.7136e-12	4.50423e-15	-1.08013e-11	-6.18158e-12	-2.77785e-11	-4.32074e-11	7.70797e-12	-1.54891e-12	0.047235	-1.25e-10	-1.77e-10	-1.48e-10	-1.61e-10	-1.91e-10	-2.07e-10	-1.88e-10	-2.01e-10	-2.05e-10	0.047235	-8.8e-11	-8.95e-11	-7.41e-11	-9.72e-11	-1.17e-10	-1.06e-10	-8.18e-11	-8.95e-11	-9.88e-11	0.047235	-3.02e-10	-3.43e-10	-3.46e-10	-3.09e-10	-3.7e-10	-3.24e-10	-3.49e-10	-3.29e-10	-3.27e-10	0.047235	7.71585e-12	6.17032e-12	1.54311e-11	6.17201e-12	-6.1737e-12	9.25914e-12	1.23429e-11	-1.54103e-12	1.38879e-11
0.04824	-2.46903e-11	-2.25211e-15	1.54272e-12	-1.54311e-11	-2.31431e-11	-2.62313e-11	-4.01237e-11	1.54554e-12	-6.17201e-12	0.04824	-1.2e-10	-1.61e-10	-1.6e-10	-1.7e-10	-1.88e-10	-2.05e-10	-1.9e-10	-1.93e-10	-2.15e-10	0.04824	-9.41e-11	-9.57e-11	-7.72e-11	-8.8e-11	-1.14e-10	-1.02e-10	-8.18e-11	-7.72e-11	-9.11e-11	0.04824	-3.13e-10	-3.32e-10	-3.4e-10	-3.06e-10	-3.63e-10	-3.16e-10	-3.49e-10	-3.43e-10	-3.32e-10	0.04824	6.17088e-12	3.0922e-12	9.26026e-12	1.07996e-11	3.08488e-12	9.25689e-12	9.26477e-12	4.6214e-12	1.54317e-11
0.049245	-1.85211e-11	1.54385e-12	1.54159e-12	-1.54362e-11	-2.31493e-11	-1.23513e-11	-3.24084e-11	1.53991e-12	-7.71473e-12	0.049245	-1.25e-10	-1.64e-10	-1.59e-10	-1.67e-10	-1.68e-10	-1.99e-10	-1.81e-10	-1.88e-10	-2.08e-10	0.049245	-9.41e-11	-8.95e-11	-8.18e-11	-8.03e-11	-1.13e-10	-1.13e-10	-9.1e-11	-9.57e-11	-9.26e-11	0.049245	-3.18e-10	-3.35e-10	-3.44e-10	-3.1e-10	-3.67e-10	-3.23e-10	-3.49e-10	-3.44e-10	-3.38e-10	0.049245	-1.53991e-12	1.54283e-11	4.6276e-12	6.16919e-12	7.71585e-12	1.5461e-12	2.00571e-11	-1.23361e-11	1.38907e-11
0.05025	-1.69756e-11	4.63098e-12	-3.08769e-12	-2.46875e-11	-2.31515e-11	-1.23446e-11	-2.31481e-11	-7.71135e-12	-4.62816e-12	0.05025	-1.4e-10	-1.51e-10	-1.62e-10	-1.73e-10	-1.71e-10	-1.99e-10	-1.88e-10	-1.94e-10	-2.11e-10	0.05025	-9.72e-11	-9.41e-11	-8.03e-11	-7.25e-11	-9.72e-11	-1.19e-10	-8.95e-11	-8.95e-11	-9.88e-11	0.05025	-3.33e-10	-3.21e-10	-3.58e-10	-3.16e-10	-3.67e-10	-3.19e-10	-3.35e-10	-3.52e-10	-3.5e-10	0.05025	-3.9412e-15	1.54345e-11	-6.17088e-12	-9.25407e-12	1.08007e-11	1.54328e-12	1.54362e-11	-1.5461e-12	1.54306e-11
0.051255	-1.38901e-11	1.07957e-11	-1.08035e-11	-2.00655e-11	-2.93173e-11	-7.71585e-12	-1.08092e-11	-3.0922e-12	3.08375e-12	0.051255	-1.27e-10	-1.47e-10	-1.71e-10	-1.82e-10	-1.77e-10	-1.93e-10	-1.84e-10	-1.91e-10	-1.98e-10	0.051255	-9.26e-11	-1.1e-10	-8.64e-11	-8.33e-11	-9.88e-11	-1.17e-10	-9.57e-11	-9.57e-11	-9.11e-11	0.051255	-3.35e-10	-3.18e-10	-3.58e-10	-3.13e-10	-3.72e-10	-3.1e-10	-3.27e-10	-3.58e-10	-3.44e-10	0.051255	-9.25407e-12	2.00604e-11	-1.07974e-11	-9.25914e-12	7.72374e-12	1.53991e-12	2.00638e-11	1.54103e-12	1.08002e-11
0.05226	-1.23451e-11	-3.07756e-12	-2.00616e-11	-2.31481e-11	-2.16127e-11	-1.54666e-12	-1.54255e-11	-1.38828e-11	3.08431e-12	0.05226	-1.36e-10	-1.45e-10	-1.68e-10	-1.77e-10	-1.61e-10	-1.77e-10	-1.99e-10	-1.79e-10	-1.96e-10	0.05226	-9.41e-11	-1.05e-10	-8.49e-11	-7.25e-11	-9.57e-11	-1.16e-10	-9.88e-11	-8.8e-11	-9.88e-11	0.05226	-3.53e-10	-3.13e-10	-3.61e-10	-3.23e-10	-3.78e-10	-3.24e-10	-3.24e-10	-3.61e-10	-3.49e-10	0.05226	-3.08769e-12	1.85194e-11	-2.25211e-15	-7.71585e-12	2.46835e-11	-7.71417e-12	2.7778e-11	-1.54216e-12	-1.53934e-12
0.053265	-7.7136e-12	7.7091e-12	-2.62313e-11	-2.31476e-11	-3.24016e-11	-4.62704e-12	-6.19332e-15	-6.1782e-12	-3.08769e-12	0.053265	-1.37e-10	-1.33e-10	-1.64e-10	-1.99e-10	-1.64e-10	-1.87e-10	-2.08e-10	-1.81e-10	-1.87e-10	0.053265	-8.03e-11	-1.06e-10	-9.11e-11	-6.48e-11	-8.64e-11	-1.08e-10	-1.16e-10	-9.57e-11	-9.88e-11	0.053265	-3.49e-10	-3.09e-10	-3.72e-10	-3.24e-10	-3.64e-10	-3.38e-10	-3.19e-10	-3.53e-10	-3.5e-10	0.053265	-2.25211e-15	1.69801e-11	4.62647e-12	-4.62647e-12	1.69801e-11	-1.07985e-11	3.24045e-11	-1.54159e-12	-3.08544e-12
0.05427	4.62197e-12	-1.54216e-12	-2.00694e-11	-1.85211e-11	-2.31504e-11	-1.68909e-15	-1.54666e-12	-1.23485e-11	-1.23463e-11	0.05427	-1.4e-10	-1.42e-10	-1.65e-10	-1.94e-10	-1.5e-10	-1.76e-10	-2.05e-10	-1.88e-10	-1.84e-10	0.05427	-8.33e-11	-9.88e-11	-9.88e-11	-7.72e-11	-8.49e-11	-1.08e-10	-1.13e-10	-1.1e-10	-9.26e-11	0.05427	-3.52e-10	-3.12e-10	-3.63e-10	-3.15e-10	-3.47e-10	-3.24e-10	-3.32e-10	-3.63e-10	-3.53e-10	0.05427	-3.0815e-12	2.62319e-11	3.9412e-15	7.71191e-12	2.00593e-11	-1.54441e-12	2.4697e-11	3.08657e-12	-1.54554e-12
0.055275	-4.62084e-12	-7.71811e-12	-3.24022e-11	-1.85166e-11	-1.69756e-11	1.68909e-15	-1.23356e-11	-2.46875e-11	-2.16026e-11	0.055275	-1.48e-10	-1.34e-10	-1.64e-10	-1.91e-10	-1.56e-10	-1.68e-10	-2.04e-10	-1.82e-10	-1.87e-10	0.055275	-7.72e-11	-9.41e-11	-1e-10	-8.64e-11	-9.41e-11	-9.88e-11	-1.19e-10	-1.06e-10	-1.02e-10	0.055275	-3.58e-10	-3.16e-10	-3.86e-10	-3.43e-10	-3.41e-10	-3.44e-10	-3.19e-10	-3.72e-10	-3.63e-10	0.055275	7.71304e-12	2.46931e-11	6.17088e-12	7.71022e-12	1.38929e-11	4.62422e-12	2.93196e-11	7.71698e-12	-6.17257e-12
0.05628	1.07957e-11	-1.8516e-11	-2.62381e-11	-1.08081e-11	-9.26026e-12	4.62816e-12	6.16469e-12	-2.31504e-11	-2.16065e-11	0.05628	-1.5e-10	-1.3e-10	-1.56e-10	-1.84e-10	-1.54e-10	-1.67e-10	-2.08e-10	-1.82e-10	-1.81e-10	0.05628	-7.41e-11	-8.18e-11	-1.03e-10	-8.64e-11	-8.03e-11	-8.95e-11	-1.25e-10	-1.13e-10	-1.08e-10	0.05628	-3.61e-10	-3.1e-10	-3.73e-10	-3.33e-10	-3.47e-10	-3.46e-10	-3.46e-10	-3.55e-10	-3.77e-10	0.05628	9.26026e-12	2.46931e-11	6.17539e-12	-9.25238e-12	1.69744e-11	-4.62253e-12	2.6233e-11	1.3889e-11	-9.25857e-12
0.057285	6.17595e-12	-2.00644e-11	-2.6233e-11	-1.69688e-11	-3.08657e-12	4.62647e-12	1.5461e-12	-2.46942e-11	-2.31521e-11	0.057285	-1.5e-10	-1.34e-10	-1.47e-10	-1.9e-10	-1.62e-10	-1.71e-10	-2.13e-10	-2.01e-10	-1.76e-10	0.057285	-7.56e-11	-8.02e-11	-1.08e-10	-8.49e-11	-9.1e-11	-9.26e-11	-1.16e-10	-1.2e-10	-9.88e-11	0.057285	-3.47e-10	-3.12e-10	-3.63e-10	-3.53e-10	-3.23e-10	-3.46e-10	-3.4e-10	-3.47e-10	-3.58e-10	0.057285	1.23446e-11	2.62341e-11	1.23463e-11	-6.17313e-12	1.54323e-11	6.17539e-12	1.54323e-11	1.852e-11	-9.26195e-12
0.05829	9.2552e-12	-2.62353e-11	-1.85217e-11	-3.08713e-12	3.08094e-12	-4.62535e-12	4.62309e-12	-3.08662e-11	-3.2405e-11	0.05829	-1.47e-10	-1.34e-10	-1.42e-10	-1.73e-10	-1.61e-10	-1.7e-10	-2.01e-10	-1.98e-10	-1.7e-10	0.05829	-7.25e-11	-6.95e-11	-1.02e-10	-1.06e-10	-8.33e-11	-8.8e-11	-1.16e-10	-1.19e-10	-1.13e-10	0.05829	-3.36e-10	-3.27e-10	-3.46e-10	-3.52e-10	-3.19e-10	-3.66e-10	-3.38e-10	-3.5e-10	-3.77e-10	0.05829	1.08097e-11	2.31487e-11	1.85183e-11	-3.08938e-12	1.23474e-11	2.31391e-11	3.08938e-12	2.46903e-11	-1.54272e-11
0.059295	5.06726e-15	-3.08662e-11	-1.69767e-11	9.25182e-12	-6.16863e-12	-1.54891e-12	-1.07945e-11	-3.85748e-11	-3.08668e-11	0.059295	-1.59e-10	-1.4e-10	-1.37e-10	-1.71e-10	-1.59e-10	-1.68e-10	-1.98e-10	-1.98e-10	-1.67e-10	0.059295	-6.48e-11	-7.41e-11	-1.08e-10	-1.03e-10	-7.87e-11	-8.03e-11	-1.03e-10	-1.19e-10	-1.17e-10	0.059295	-3.4e-10	-3.24e-10	-3.61e-10	-3.49e-10	-3.23e-10	-3.6e-10	-3.44e-10	-3.41e-10	-3.72e-10	0.059295	2.77718e-11	1.85171e-11	2.16054e-11	-7.71135e-12	1.23423e-11	1.23513e-11	-1.53934e-12	2.46903e-11	-6.17539e-12
0.0603	4.62591e-12	-3.70343e-11	-1.69727e-11	3.37817e-15	-3.08826e-12	-1.38856e-11	-3.08938e-12	-2.62403e-11	-3.2405e-11	0.0603	-1.48e-10	-1.4e-10	-1.34e-10	-1.61e-10	-1.67e-10	-1.64e-10	-1.88e-10	-2.01e-10	-1.71e-10	0.0603	-5.71e-11	-6.95e-11	-9.11e-11	-9.88e-11	-8.64e-11	-7.41e-11	-1.13e-10	-1.14e-10	-1.22e-10	0.0603	-3.35e-10	-3.38e-10	-3.49e-10	-3.43e-10	-3.24e-10	-3.64e-10	-3.49e-10	-3.44e-10	-3.92e-10	0.0603	2.46942e-11	7.7198e-12	2.31464e-11	1.53315e-12	1.54835e-12	1.54334e-11	4.62535e-12	1.85205e-11	-3.08488e-12
0.061305	-1.54385e-12	-3.08668e-11	-7.71754e-12	2.25211e-15	-4.62535e-12	-1.5434e-11	-3.08938e-12	-2.62302e-11	-2.31515e-11	0.061305	-1.42e-10	-1.45e-10	-1.37e-10	-1.62e-10	-1.65e-10	-1.74e-10	-1.84e-10	-1.99e-10	-1.7e-10	0.061305	-5.86e-11	-7.25e-11	-9.72e-11	-1.13e-10	-8.8e-11	-8.64e-11	-9.41e-11	-1.08e-10	-1.34e-10	0.061305	-3.23e-10	-3.52e-10	-3.36e-10	-3.33e-10	-3.15e-10	-3.63e-10	-3.56e-10	-3.36e-10	-3.69e-10	0.061305	2.62347e-11	6.17088e-12	1.69801e-11	-1.69649e-11	4.62366e-12	2.00627e-11	-1.54216e-12	1.54334e-11	4.62929e-12
0.06231	-9.25857e-12	-2.77785e-11	-1.54385e-12	6.17144e-12	6.16356e-12	-2.00616e-11	-1.08047e-11	-1.08142e-11	-2.00632e-11	0.06231	-1.34e-10	-1.44e-10	-1.39e-10	-1.51e-10	-1.81e-10	-1.76e-10	-1.81e-10	-2.01e-10	-1.76e-10	0.06231	-6.94e-11	-6.79e-11	-8.8e-11	-1.05e-10	-9.41e-11	-7.41e-11	-8.8e-11	-1.1e-10	-1.27e-10	0.06231	-3.12e-10	-3.53e-10	-3.24e-10	-3.41e-10	-3.23e-10	-3.43e-10	-3.41e-10	-3.33e-10	-3.57e-10	0.06231	2.46908e-11	-1.54103e-12	2.16043e-11	-4.6321e-12	-9.25689e-12	2.46875e-11	-4.62647e-12	1.38929e-11	1.08007e-11
0.063315	-1.38912e-11	-2.31509e-11	3.08263e-12	7.71248e-12	-9.25013e-12	-2.16048e-11	-2.31481e-11	-2.62279e-11	-1.85177e-11	0.063315	-1.23e-10	-1.48e-10	-1.27e-10	-1.57e-10	-1.79e-10	-1.73e-10	-1.84e-10	-2.01e-10	-1.74e-10	0.063315	-7.56e-11	-7.1e-11	-8.03e-11	-1.08e-10	-1.11e-10	-8.64e-11	-9.11e-11	-9.72e-11	-1.19e-10	0.063315	-3.01e-10	-3.53e-10	-3.35e-10	-3.27e-10	-3.27e-10	-3.44e-10	-3.73e-10	-3.23e-10	-3.63e-10	0.063315	1.85239e-11	-3.08769e-12	2.16026e-11	1.53765e-12	-1.54323e-11	1.54396e-11	1.53765e-12	2.16015e-11	1.08024e-11
0.06432	-2.31453e-11	-2.31436e-11	-3.08037e-12	-1.53653e-12	1.53822e-12	-2.00706e-11	-3.24022e-11	-2.00587e-11	-1.23508e-11	0.06432	-1.27e-10	-1.59e-10	-1.39e-10	-1.47e-10	-1.81e-10	-1.81e-10	-1.7e-10	-1.98e-10	-1.81e-10	0.06432	-8.49e-11	-7.56e-11	-7.25e-11	-9.88e-11	-1.1e-10	-8.33e-11	-8.49e-11	-1.06e-10	-1.2e-10	0.06432	-3.13e-10	-3.58e-10	-3.36e-10	-3.12e-10	-3.29e-10	-3.38e-10	-3.55e-10	-3.24e-10	-3.43e-10	0.06432	2.46914e-11	-7.71529e-12	1.23508e-11	-7.70854e-12	-2.00576e-11	2.46875e-11	-7.71417e-12	1.69744e-11	9.26364e-12
0.065325	-2.16122e-11	-7.72317e-12	7.71135e-12	7.7091e-12	-1.54722e-12	-4.0113e-11	-2.31554e-11	-3.09332e-12	-1.85138e-11	0.065325	-1.33e-10	-1.57e-10	-1.27e-10	-1.51e-10	-1.82e-10	-1.85e-10	-1.68e-10	-1.82e-10	-1.87e-10	0.065325	-8.8e-11	-8.03e-11	-7.56e-11	-1e-10	-1.1e-10	-9.11e-11	-7.87e-11	-8.95e-11	-1.2e-10	0.065325	-3.15e-10	-3.47e-10	-3.43e-10	-3.19e-10	-3.41e-10	-3.24e-10	-3.69e-10	-3.21e-10	-3.41e-10	0.065325	2.77718e-11	-9.2552e-12	1.54289e-11	4.62366e-12	-1.08064e-11	2.00672e-11	-1.07968e-11	7.71417e-12	1.8516e-11
0.06633	-3.70281e-11	-1.0799e-11	4.63267e-12	-3.08375e-12	-1.543e-11	-2.62403e-11	-3.08634e-11	-4.63098e-12	-9.26083e-12	0.06633	-1.17e-10	-1.62e-10	-1.37e-10	-1.59e-10	-1.76e-10	-1.87e-10	-1.62e-10	-1.87e-10	-1.87e-10	0.06633	-1.03e-10	-8.33e-11	-8.8e-11	-9.41e-11	-1.08e-10	-9.88e-11	-8.03e-11	-8.95e-11	-1.08e-10	0.06633	-3.13e-10	-3.43e-10	-3.35e-10	-3.16e-10	-3.38e-10	-3.15e-10	-3.67e-10	-3.21e-10	-3.47e-10	0.06633	1.08075e-11	1.53596e-12	7.71867e-12	2.81514e-15	-1.08035e-11	2.77707e-11	3.08094e-12	-7.7091e-12	1.85194e-11
0.067335	-2.31543e-11	-3.08713e-12	9.25576e-12	-6.1737e-12	-2.16026e-11	-2.46914e-11	-3.24061e-11	-9.25069e-12	-3.08769e-12	0.067335	-1.14e-10	-1.5e-10	-1.37e-10	-1.5e-10	-1.73e-10	-1.85e-10	-1.67e-10	-1.76e-10	-1.94e-10	0.067335	-9.26e-11	-9.88e-11	-7.72e-11	-8.95e-11	-1.14e-10	-1.1e-10	-8.64e-11	-8.8e-11	-9.88e-11	0.067335	-3.13e-10	-3.46e-10	-3.36e-10	-3.27e-10	-3.49e-10	-3.3e-10	-3.6e-10	-3.23e-10	-3.46e-10	0.067335	6.17426e-12	-7.70741e-12	6.17313e-12	3.08882e-12	-1.23429e-11	1.23525e-11	1.54779e-12	-3.08882e-12	1.85188e-11
0.06834	-2.31464e-11	3.08319e-12	3.08488e-12	-1.08052e-11	-1.85239e-11	-2.00666e-11	-2.62364e-11	1.07917e-11	1.12606e-15	0.06834	-1.17e-10	-1.53e-10	-1.48e-10	-1.57e-10	-1.7e-10	-1.93e-10	-1.62e-10	-1.73e-10	-1.88e-10	0.06834	-1.08e-10	-1.02e-10	-8.02e-11	-7.72e-11	-1.14e-10	-1.08e-10	-8.49e-11	-8.18e-11	-1e-10	0.06834	-3.24e-10	-3.3e-10	-3.43e-10	-3.3e-10	-3.36e-10	-3.32e-10	-3.5e-10	-3.26e-10	-3.46e-10	0.06834	4.6276e-12	7.70966e-12	4.6276e-12	1.23418e-11	-4.63267e-12	1.38879e-11	1.23435e-11	-4.63323e-12	1.69739e-11
0.069345	-1.54362e-11	4.50423e-15	-7.71079e-12	-2.15992e-11	-2.77723e-11	-2.62313e-11	-2.1606e-11	-5.63029e-16	6.16807e-12	0.069345	-1.16e-10	-1.5e-10	-1.5e-10	-1.65e-10	-1.62e-10	-1.84e-10	-1.67e-10	-1.71e-10	-1.93e-10	0.069345	-1.05e-10	-9.88e-11	-7.56e-11	-7.87e-11	-1.08e-10	-1.17e-10	-7.72e-11	-8.18e-11	-9.11e-11	0.069345	-3.27e-10	-3.41e-10	-3.36e-10	-3.29e-10	-3.52e-10	-3.19e-10	-3.44e-10	-3.43e-10	-3.58e-10	0.069345	-3.08488e-12	4.63379e-12	-3.08657e-12	9.25857e-12	-4.62478e-12	1.0799e-11	1.54351e-11	-1.54238e-11	9.26308e-12
0.07035	-1.69756e-11	9.25407e-12	-3.09107e-12	-1.38941e-11	-1.85256e-11	-2.00616e-11	-1.69767e-11	-1.23361e-11	-1.53822e-12	0.07035	-1.23e-10	-1.39e-10	-1.56e-10	-1.62e-10	-1.67e-10	-1.85e-10	-1.74e-10	-1.74e-10	-1.82e-10	0.07035	-1.05e-10	-8.95e-11	-7.72e-11	-7.1e-11	-1e-10	-1.11e-10	-1e-10	-9.41e-11	-1.02e-10	0.07035	-3.32e-10	-3.23e-10	-3.36e-10	-3.21e-10	-3.58e-10	-3.13e-10	-3.35e-10	-3.49e-10	-3.56e-10	0.07035	-6.17313e-12	1.23463e-11	-1.08002e-11	3.09614e-12	9.25689e-12	-3.08094e-12	2.46875e-11	-1.5506e-12	1.07996e-11
0.071355	-1.69705e-11	3.08769e-12	-1.08007e-11	-1.85211e-11	-2.62353e-11	-1.0803e-11	-1.38879e-11	3.07868e-12	4.62478e-12	0.071355	-1.2e-10	-1.36e-10	-1.54e-10	-1.68e-10	-1.65e-10	-1.79e-10	-1.68e-10	-1.7e-10	-1.87e-10	0.071355	-1e-10	-1.05e-10	-8.03e-11	-7.87e-11	-9.88e-11	-1.19e-10	-1.1e-10	-9.11e-11	-9.41e-11	0.071355	-3.52e-10	-3.12e-10	-3.49e-10	-3.3e-10	-3.61e-10	-3.29e-10	-3.35e-10	-3.56e-10	-3.41e-10	0.071355	-9.25801e-12	2.00593e-11	-1.08007e-11	2.3138e-11	1.54295e-11	-1.5461e-12	2.00678e-11	-7.71642e-12	3.09051e-12
0.07236	-1.55173e-12	0	-1.23485e-11	-2.77752e-11	-3.24039e-11	-1.54835e-12	-6.17651e-12	-3.08657e-12	-3.08319e-12	0.07236	-1.23e-10	-1.23e-10	-1.59e-10	-1.65e-10	-1.56e-10	-1.73e-10	-1.79e-10	-1.73e-10	-1.74e-10	0.07236	-8.49e-11	-1.06e-10	-9.26e-11	-7.56e-11	-1e-10	-1.13e-10	-1.06e-10	-9.11e-11	-9.11e-11	0.07236	-3.44e-10	-3.19e-10	-3.49e-10	-3.29e-10	-3.43e-10	-3.18e-10	-3.13e-10	-3.66e-10	-3.46e-10	0.07236	-7.71642e-12	1.85222e-11	-4.62985e-12	1.23508e-11	1.23502e-11	-7.71248e-12	2.93184e-11	-1.38845e-11	6.17032e-12
0.073365	-9.25069e-12	-3.08769e-12	-2.00593e-11	-2.6233e-11	-2.4697e-11	-6.16638e-12	-7.71473e-12	-9.2597e-12	-1.54666e-12	0.073365	-1.34e-10	-1.27e-10	-1.54e-10	-1.74e-10	-1.47e-10	-1.67e-10	-1.81e-10	-1.61e-10	-1.77e-10	0.073365	-8.49e-11	-1e-10	-8.95e-11	-6.64e-11	-8.49e-11	-1.06e-10	-1.17e-10	-1.02e-10	-9.26e-11	0.073365	-3.52e-10	-3.07e-10	-3.53e-10	-3.41e-10	-3.43e-10	-3.27e-10	-3.21e-10	-3.6e-10	-3.55e-10	0.073365	-6.17257e-12	2.46903e-11	1.53991e-12	1.38856e-11	2.00587e-11	-3.08769e-12	2.77769e-11	-6.17426e-12	1.54216e-12
0.07437	7.70685e-12	-9.25914e-12	-1.85267e-11	-1.69823e-11	-2.93139e-11	7.70966e-12	-4.62929e-12	-1.54311e-11	-9.26026e-12	0.07437	-1.36e-10	-1.22e-10	-1.47e-10	-1.81e-10	-1.48e-10	-1.65e-10	-1.87e-10	-1.68e-10	-1.68e-10	0.07437	-7.72e-11	-9.57e-11	-1e-10	-7.25e-11	-7.72e-11	-9.88e-11	-1.19e-10	-1.13e-10	-9.26e-11	0.07437	-3.53e-10	-3.07e-10	-3.72e-10	-3.43e-10	-3.43e-10	-3.3e-10	-3.09e-10	-3.58e-10	-3.53e-10	0.07437	-3.08094e-12	2.46903e-11	-1.54159e-12	4.62985e-12	1.69767e-11	-1.54441e-12	2.00672e-11	-1.54047e-12	-6.17201e-12
0.075375	-1.53653e-12	-1.38867e-11	-3.70259e-11	-2.46858e-11	-1.08097e-11	3.08657e-12	0	-1.69801e-11	-1.85166e-11	0.075375	-1.34e-10	-1.19e-10	-1.54e-10	-1.79e-10	-1.44e-10	-1.62e-10	-1.85e-10	-1.71e-10	-1.59e-10	0.075375	-8.02e-11	-8.95e-11	-1.03e-10	-6.95e-11	-8.8e-11	-9.41e-11	-1.19e-10	-1.13e-10	-1e-10	0.075375	-3.47e-10	-3.12e-10	-3.7e-10	-3.38e-10	-3.32e-10	-3.43e-10	-3.24e-10	-3.7e-10	-3.69e-10	0.075375	1.54255e-11	1.85262e-11	5.06726e-15	-4.62535e-12	1.54328e-11	-3.086e-12	2.4692e-11	1.08002e-11	-1.08019e-11
0.07638	7.7136e-12	-1.08092e-11	-2.00689e-11	-1.38935e-11	-1.08035e-11	-1.54497e-12	4.62309e-12	-2.93156e-11	-2.00655e-11	0.07638	-1.42e-10	-1.17e-10	-1.44e-10	-1.76e-10	-1.44e-10	-1.62e-10	-1.88e-10	-1.73e-10	-1.54e-10	0.07638	-7.72e-11	-8.33e-11	-1.02e-10	-8.18e-11	-8.03e-11	-8.95e-11	-1.19e-10	-1.23e-10	-1.06e-10	0.07638	-3.46e-10	-3.19e-10	-3.57e-10	-3.41e-10	-3.26e-10	-3.6e-10	-3.12e-10	-3.6e-10	-3.7e-10	0.07638	1.38918e-11	3.08589e-11	1.5425e-11	-1.5506e-12	1.38912e-11	-3.08037e-12	2.7774e-11	1.54328e-11	-1.23423e-11
0.077385	9.2552e-12	-2.46869e-11	-2.00672e-11	-1.38834e-11	-1.23418e-11	-1.0799e-11	-9.25463e-12	-2.31543e-11	-2.93179e-11	0.077385	-1.42e-10	-1.25e-10	-1.47e-10	-1.79e-10	-1.47e-10	-1.64e-10	-1.9e-10	-1.79e-10	-1.53e-10	0.077385	-6.64e-11	-7.1e-11	-1.11e-10	-9.41e-11	-8.18e-11	-8.33e-11	-1.13e-10	-1.28e-10	-1.06e-10	0.077385	-3.46e-10	-3.3e-10	-3.46e-10	-3.56e-10	-3.23e-10	-3.47e-10	-3.19e-10	-3.52e-10	-3.75e-10	0.077385	1.85171e-11	2.46908e-11	9.26646e-12	-1.85065e-11	1.69733e-11	1.38822e-11	1.69784e-11	2.00627e-11	-3.09389e-12
0.07839	-1.53822e-12	-2.31509e-11	-3.23999e-11	3.07812e-12	-1.54666e-12	-9.26195e-12	-9.25407e-12	-3.08634e-11	-2.62375e-11	0.07839	-1.37e-10	-1.22e-10	-1.27e-10	-1.59e-10	-1.44e-10	-1.53e-10	-1.94e-10	-1.93e-10	-1.59e-10	0.07839	-6.64e-11	-7.72e-11	-1.11e-10	-9.26e-11	-8.18e-11	-8.49e-11	-1.19e-10	-1.19e-10	-1.22e-10	0.07839	-3.33e-10	-3.23e-10	-3.47e-10	-3.69e-10	-3.4e-10	-3.67e-10	-3.3e-10	-3.44e-10	-3.77e-10	0.07839	1.69761e-11	1.38957e-11	2.1602e-11	-1.63278e-14	1.23485e-11	1.08064e-11	1.23451e-11	2.46875e-11	-1.38845e-11
0.079395	1.54272e-12	-2.62381e-11	-2.00672e-11	-3.08375e-12	2.81514e-15	-1.38822e-11	6.16018e-12	-3.24056e-11	-2.77769e-11	0.079395	-1.44e-10	-1.25e-10	-1.25e-10	-1.67e-10	-1.48e-10	-1.59e-10	-1.85e-10	-1.87e-10	-1.54e-10	0.079395	-5.71e-11	-8.02e-11	-9.72e-11	-1e-10	-7.72e-11	-8.18e-11	-1.02e-10	-1.13e-10	-1.1e-10	0.079395	-3.36e-10	-3.21e-10	-3.49e-10	-3.66e-10	-3.38e-10	-3.55e-10	-3.3e-10	-3.4e-10	-3.77e-10	0.079395	1.54402e-11	2.00565e-11	2.3147e-11	-2.62217e-11	1.38817e-11	1.69739e-11	4.63323e-12	1.54396e-11	-1.08002e-11
0.0804	3.08263e-12	-3.54899e-11	-2.00587e-11	-1.54103e-12	9.25238e-12	1.53146e-12	-1.38817e-11	-2.46959e-11	-2.31487e-11	0.0804	-1.33e-10	-1.23e-10	-1.22e-10	-1.47e-10	-1.57e-10	-1.57e-10	-1.87e-10	-1.88e-10	-1.56e-10	0.0804	-6.64e-11	-6.95e-11	-1.02e-10	-1.03e-10	-8.49e-11	-8.03e-11	-9.72e-11	-1.22e-10	-1.16e-10	0.0804	-3.07e-10	-3.38e-10	-3.4e-10	-3.58e-10	-3.19e-10	-3.56e-10	-3.47e-10	-3.4e-10	-3.78e-10	0.0804	3.3941e-11	9.26026e-12	1.85222e-11	-1.38924e-11	-6.16356e-12	1.69778e-11	6.16919e-12	2.46886e-11	-3.9412e-15
0.081405	-6.17201e-12	-2.93241e-11	-9.26083e-12	6.17032e-12	-1.53934e-12	-1.54306e-11	-1.2353e-11	-2.62353e-11	-1.69806e-11	0.081405	-1.23e-10	-1.3e-10	-1.31e-10	-1.34e-10	-1.65e-10	-1.61e-10	-1.64e-10	-1.88e-10	-1.57e-10	0.081405	-6.94e-11	-7.72e-11	-9.57e-11	-1e-10	-8.64e-11	-8.03e-11	-9.57e-11	-1.08e-10	-1.23e-10	0.081405	-2.95e-10	-3.46e-10	-3.36e-10	-3.44e-10	-3.19e-10	-3.6e-10	-3.44e-10	-3.4e-10	-3.81e-10	0.081405	2.1611e-11	3.37817e-15	2.1606e-11	-9.26083e-12	-2.81514e-15	2.1606e-11	-3.08319e-12	2.31447e-11	6.19332e-15
0.08241	-1.23468e-11	-2.77785e-11	-1.54554e-12	6.1737e-12	-1.54047e-12	-2.62285e-11	-2.93128e-11	-2.6233e-11	-2.31453e-11	0.08241	-1.2e-10	-1.31e-10	-1.2e-10	-1.37e-10	-1.65e-10	-1.61e-10	-1.76e-10	-1.81e-10	-1.62e-10	0.08241	-6.79e-11	-6.79e-11	-8.64e-11	-1.05e-10	-9.26e-11	-8.64e-11	-9.11e-11	-1.11e-10	-1.27e-10	0.08241	-2.99e-10	-3.56e-10	-3.15e-10	-3.24e-10	-3.32e-10	-3.49e-10	-3.6e-10	-3.33e-10	-3.69e-10	0.08241	2.31487e-11	1.68909e-15	2.46897e-11	-7.7136e-12	-1.54216e-12	2.62319e-11	-3.08657e-12	9.26589e-12	1.69705e-11
0.083415	-2.00616e-11	-2.46897e-11	1.12606e-15	7.71191e-12	6.17032e-12	-1.69857e-11	-2.00655e-11	-1.85194e-11	-1.85211e-11	0.083415	-1.23e-10	-1.36e-10	-1.22e-10	-1.44e-10	-1.65e-10	-1.67e-10	-1.59e-10	-1.85e-10	-1.64e-10	0.083415	-7.1e-11	-6.64e-11	-8.33e-11	-1.11e-10	-9.88e-11	-8.33e-11	-8.49e-11	-1.02e-10	-1.22e-10	0.083415	-3.01e-10	-3.46e-10	-3.24e-10	-3.36e-10	-3.33e-10	-3.35e-10	-3.63e-10	-3.33e-10	-3.49e-10	0.083415	2.31493e-11	4.62647e-12	2.00627e-11	1.54047e-12	-3.9412e-15	2.00644e-11	-3.08882e-12	1.23429e-11	1.8516e-11
0.08442	-2.46908e-11	-1.38929e-11	4.62704e-12	-3.08431e-12	6.17201e-12	-3.39444e-11	-1.85267e-11	-1.08047e-11	-1.85188e-11	0.08442	-1.14e-10	-1.44e-10	-1.16e-10	-1.3e-10	-1.71e-10	-1.85e-10	-1.64e-10	-1.88e-10	-1.7e-10	0.08442	-7.72e-11	-7.87e-11	-7.41e-11	-1.08e-10	-1.08e-10	-9.26e-11	-8.64e-11	-8.95e-11	-1.03e-10	0.08442	-3.01e-10	-3.44e-10	-3.26e-10	-3.4e-10	-3.47e-10	-3.33e-10	-3.64e-10	-3.19e-10	-3.61e-10	0.08442	2.31476e-11	1.68909e-15	1.54311e-11	3.08544e-12	-9.25745e-12	1.85211e-11	-9.25857e-12	6.17595e-12	1.08086e-11
0.085425	-2.46948e-11	-1.23435e-11	1.54441e-12	-7.71473e-12	3.08319e-12	-2.93241e-11	-3.70309e-11	-7.71585e-12	-1.69767e-11	0.085425	-1.14e-10	-1.44e-10	-1.25e-10	-1.37e-10	-1.62e-10	-1.71e-10	-1.59e-10	-1.79e-10	-1.79e-10	0.085425	-8.03e-11	-8.03e-11	-6.79e-11	-1.08e-10	-1.11e-10	-9.57e-11	-6.95e-11	-8.8e-11	-1.08e-10	0.085425	-3.04e-10	-3.49e-10	-3.24e-10	-3.19e-10	-3.32e-10	-3.29e-10	-3.53e-10	-3.18e-10	-3.46e-10	0.085425	1.85188e-11	-5.06726e-15	6.1782e-12	1.54948e-12	-1.23412e-11	2.16071e-11	-1.23401e-11	7.71417e-12	1.85166e-11
0.08643	-3.08623e-11	-3.08826e-12	1.54328e-12	-7.71473e-12	-9.26252e-12	-2.93235e-11	-3.39517e-11	-3.08826e-12	-1.69722e-11	0.08643	-1.14e-10	-1.44e-10	-1.3e-10	-1.37e-10	-1.71e-10	-1.9e-10	-1.68e-10	-1.74e-10	-1.71e-10	0.08643	-8.95e-11	-8.8e-11	-6.02e-11	-8.95e-11	-1.16e-10	-8.95e-11	-8.33e-11	-8.95e-11	-1.06e-10	0.08643	-3.06e-10	-3.58e-10	-3.24e-10	-3.23e-10	-3.41e-10	-3.16e-10	-3.58e-10	-3.23e-10	-3.44e-10	0.08643	1.23468e-11	-1.38777e-11	1.08002e-11	1.69694e-11	-1.54835e-12	2.77712e-11	1.53934e-12	3.08319e-12	1.85222e-11
0.087435	-2.77785e-11	1.54216e-12	1.54272e-12	-3.09276e-12	-2.93106e-11	-3.24022e-11	-2.93269e-11	-3.08544e-12	-6.17539e-12	0.087435	-1.05e-10	-1.42e-10	-1.34e-10	-1.4e-10	-1.59e-10	-1.82e-10	-1.64e-10	-1.64e-10	-1.76e-10	0.087435	-8.95e-11	-9.11e-11	-7.56e-11	-8.95e-11	-1.03e-10	-9.88e-11	-8.03e-11	-8.49e-11	-1.06e-10	0.087435	-3.09e-10	-3.41e-10	-3.23e-10	-3.16e-10	-3.4e-10	-3.15e-10	-3.49e-10	-3.4e-10	-3.44e-10	0.087435	7.7136e-12	4.62309e-12	7.71529e-12	1.3889e-11	-4.6321e-12	1.23519e-11	4.63098e-12	-1.07968e-11	2.62262e-11
0.08844	-2.31515e-11	3.08713e-12	0	-1.54295e-11	-1.69806e-11	-1.69795e-11	-3.70309e-11	-1.68909e-15	-1.54385e-12	0.08844	-1.1e-10	-1.36e-10	-1.4e-10	-1.45e-10	-1.56e-10	-1.79e-10	-1.59e-10	-1.62e-10	-1.76e-10	0.08844	-9.88e-11	-8.95e-11	-7.1e-11	-8.64e-11	-1.05e-10	-1.06e-10	-8.49e-11	-8.95e-11	-9.11e-11	0.08844	-3.12e-10	-3.4e-10	-3.23e-10	-3.18e-10	-3.44e-10	-3.15e-10	-3.36e-10	-3.32e-10	-3.3e-10	0.08844	-4.6214e-12	4.62929e-12	1.54385e-12	9.26139e-12	-1.388e-11	1.23412e-11	1.0803e-11	-7.72036e-12	7.72599e-12
0.089445	-2.46897e-11	6.1675e-12	-1.54497e-12	-1.85183e-11	-1.69784e-11	-1.08069e-11	-2.31532e-11	-1.54779e-12	1.54272e-12	0.089445	-9.88e-11	-1.37e-10	-1.44e-10	-1.53e-10	-1.5e-10	-1.87e-10	-1.65e-10	-1.51e-10	-1.76e-10	0.089445	-1.05e-10	-1.02e-10	-7.56e-11	-8.33e-11	-1.08e-10	-1.1e-10	-8.49e-11	-8.8e-11	-9.41e-11	0.089445	-3.23e-10	-3.24e-10	-3.43e-10	-3.21e-10	-3.56e-10	-3.16e-10	-3.47e-10	-3.46e-10	-3.32e-10	0.089445	6.16581e-12	3.09163e-12	-3.08769e-12	9.26308e-12	3.0815e-12	-1.53653e-12	1.69727e-11	-1.54266e-11	1.54283e-11
0.09045	-1.85183e-11	-6.16525e-12	-7.71473e-12	-1.852e-11	-2.31532e-11	-1.54311e-11	-2.00632e-11	-1.5425e-11	3.08431e-12	0.09045	-1.06e-10	-1.33e-10	-1.39e-10	-1.54e-10	-1.48e-10	-1.82e-10	-1.65e-10	-1.57e-10	-1.73e-10	0.09045	-9.26e-11	-1.05e-10	-7.87e-11	-8.03e-11	-1.03e-10	-1.17e-10	-1.06e-10	-9.11e-11	-9.41e-11	0.09045	-3.3e-10	-3.21e-10	-3.36e-10	-3.33e-10	-3.46e-10	-3.1e-10	-3.3e-10	-3.58e-10	-3.5e-10	0.09045	-3.08319e-12	1.543e-11	-1.07979e-11	1.85138e-11	6.17595e-12	3.07643e-12	1.38946e-11	-6.17933e-12	1.08019e-11
0.091455	-9.26195e-12	3.0815e-12	-9.26252e-12	-2.00621e-11	-4.01119e-11	-1.54306e-11	-1.85171e-11	-7.71642e-12	-1.54159e-12	0.091455	-1.14e-10	-1.17e-10	-1.53e-10	-1.54e-10	-1.5e-10	-1.73e-10	-1.7e-10	-1.51e-10	-1.67e-10	0.091455	-9.72e-11	-1.03e-10	-9.1e-11	-7.87e-11	-1.03e-10	-1.13e-10	-9.88e-11	-9.57e-11	-8.64e-11	0.091455	-3.33e-10	-3.15e-10	-3.66e-10	-3.18e-10	-3.52e-10	-3.09e-10	-3.3e-10	-3.53e-10	-3.33e-10	0.091455	-3.08488e-12	2.00638e-11	-4.63548e-12	1.23536e-11	1.69705e-11	-2.00503e-11	2.46858e-11	-1.38817e-11	3.08995e-12
0.09246	-6.17144e-12	-1.54047e-12	-1.85155e-11	-2.00644e-11	-2.00739e-11	-9.26083e-12	-1.08041e-11	-7.31937e-15	-1.54497e-12	0.09246	-1.22e-10	-1.14e-10	-1.57e-10	-1.54e-10	-1.39e-10	-1.67e-10	-1.73e-10	-1.54e-10	-1.65e-10	0.09246	-9.41e-11	-1e-10	-8.95e-11	-7.41e-11	-8.8e-11	-1.17e-10	-1e-10	-8.49e-11	-9.11e-11	0.09246	-3.35e-10	-3.09e-10	-3.43e-10	-3.15e-10	-3.53e-10	-3.23e-10	-3.24e-10	-3.46e-10	-3.43e-10	0.09246	1.54159e-12	2.77735e-11	-1.38817e-11	2.62268e-11	1.23513e-11	-9.26252e-12	1.69812e-11	-5.63029e-15	4.62591e-12
0.093465	1.53822e-12	1.53765e-12	-1.69772e-11	-2.46869e-11	-3.08567e-11	-6.17201e-12	-6.17426e-12	-1.23401e-11	-6.17144e-12	0.093465	-1.19e-10	-1.17e-10	-1.53e-10	-1.57e-10	-1.42e-10	-1.65e-10	-1.74e-10	-1.47e-10	-1.64e-10	0.093465	-9.26e-11	-9.72e-11	-8.49e-11	-8.33e-11	-8.8e-11	-1.08e-10	-1.08e-10	-1.06e-10	-9.57e-11	0.093465	-3.26e-10	-3.15e-10	-3.63e-10	-3.13e-10	-3.46e-10	-3.18e-10	-3.21e-10	-3.52e-10	-3.36e-10	0.093465	1.54441e-12	2.00655e-11	-1.5506e-12	1.54362e-11	2.16015e-11	-6.17032e-12	2.3147e-11	-1.53991e-12	-4.62816e-12
0.09447	-4.62535e-12	-1.07968e-11	-1.852e-11	-1.38946e-11	-1.69834e-11	-5.63029e-16	-4.6276e-12	-7.72543e-12	-6.17482e-12	0.09447	-1.19e-10	-1.1e-10	-1.51e-10	-1.59e-10	-1.4e-10	-1.48e-10	-1.76e-10	-1.6e-10	-1.45e-10	0.09447	-7.41e-11	-1e-10	-9.26e-11	-7.87e-11	-8.33e-11	-1.16e-10	-1.2e-10	-1.06e-10	-9.88e-11	0.09447	-3.49e-10	-3.12e-10	-3.61e-10	-3.33e-10	-3.33e-10	-3.38e-10	-3.15e-10	-3.6e-10	-3.58e-10	0.09447	4.62985e-12	2.00627e-11	-9.24844e-12	1.38884e-11	1.85239e-11	4.62197e-12	2.31504e-11	6.17257e-12	-9.25576e-12
0.095475	1.54047e-12	-6.17708e-12	-2.1606e-11	-1.6975e-11	-2.31453e-11	4.6276e-12	3.08094e-12	-2.77695e-11	-1.08047e-11	0.095475	-1.25e-10	-1.13e-10	-1.44e-10	-1.56e-10	-1.42e-10	-1.45e-10	-1.88e-10	-1.59e-10	-1.45e-10	0.095475	-8.33e-11	-9.72e-11	-1.1e-10	-7.87e-11	-8.49e-11	-9.41e-11	-1.19e-10	-1.13e-10	-1e-10	0.095475	-3.4e-10	-3.27e-10	-3.55e-10	-3.53e-10	-3.35e-10	-3.5e-10	-3.27e-10	-3.63e-10	-3.63e-10	0.095475	7.71642e-12	2.00599e-11	1.38817e-11	9.26083e-12	2.77712e-11	-6.16694e-12	2.62319e-11	1.23463e-11	-3.08995e-12
0.09648	-5.63029e-16	-1.23468e-11	-2.46886e-11	-1.69727e-11	-1.85177e-11	3.08544e-12	-4.62422e-12	-2.16082e-11	-2.00638e-11	0.09648	-1.37e-10	-1.22e-10	-1.31e-10	-1.64e-10	-1.44e-10	-1.51e-10	-1.87e-10	-1.57e-10	-1.5e-10	0.09648	-6.95e-11	-8.64e-11	-9.88e-11	-8.18e-11	-7.56e-11	-8.95e-11	-1.1e-10	-1.1e-10	-9.57e-11	0.09648	-3.35e-10	-3.09e-10	-3.72e-10	-3.36e-10	-3.33e-10	-3.36e-10	-3.23e-10	-3.69e-10	-3.69e-10	0.09648	1.08019e-11	1.23513e-11	1.54328e-11	7.71417e-12	1.54385e-11	-1.12606e-15	1.852e-11	1.85143e-11	-6.17088e-12
0.097485	-3.08206e-12	-2.00599e-11	-1.69823e-11	-7.71867e-12	-9.26364e-12	-1.53878e-12	3.07812e-12	-2.16082e-11	-3.23999e-11	0.097485	-1.42e-10	-1.19e-10	-1.3e-10	-1.54e-10	-1.39e-10	-1.48e-10	-1.88e-10	-1.71e-10	-1.4e-10	0.097485	-6.94e-11	-7.87e-11	-1.14e-10	-8.8e-11	-7.87e-11	-8.64e-11	-1.16e-10	-1.1e-10	-1.05e-10	0.097485	-3.36e-10	-3.23e-10	-3.29e-10	-3.67e-10	-3.36e-10	-3.46e-10	-3.36e-10	-3.53e-10	-3.72e-10	0.097485	1.08041e-11	1.85149e-11	1.69778e-11	3.37817e-15	1.85155e-11	3.08769e-12	1.23502e-11	1.08109e-11	-3.09051e-12
0.09849	6.1675e-12	-2.00678e-11	-2.62308e-11	-4.62816e-12	-1.07985e-11	6.16807e-12	-1.23384e-11	-2.77774e-11	-2.00745e-11	0.09849	-1.36e-10	-1.13e-10	-1.37e-10	-1.47e-10	-1.4e-10	-1.45e-10	-1.79e-10	-1.67e-10	-1.42e-10	0.09849	-6.02e-11	-7.56e-11	-1.08e-10	-9.57e-11	-7.87e-11	-7.1e-11	-1.13e-10	-1.22e-10	-1.16e-10	0.09849	-3.24e-10	-3.27e-10	-3.52e-10	-3.63e-10	-3.15e-10	-3.53e-10	-3.35e-10	-3.56e-10	-3.7e-10	0.09849	1.38896e-11	1.2348e-11	2.31453e-11	1.53934e-12	1.08047e-11	9.25801e-12	1.69677e-11	2.46858e-11	-1.07996e-11
0.099495	-5.63029e-16	-3.3946e-11	-2.16026e-11	3.08263e-12	-7.31937e-15	-1.68909e-15	-6.17708e-12	-2.9323e-11	-4.01197e-11	0.099495	-1.33e-10	-1.16e-10	-1.2e-10	-1.44e-10	-1.48e-10	-1.48e-10	-1.74e-10	-1.73e-10	-1.4e-10	0.099495	-6.33e-11	-7.1e-11	-1.02e-10	-1.02e-10	-8.64e-11	-8.02e-11	-1.08e-10	-1.17e-10	-1.2e-10	0.099495	-3.19e-10	-3.26e-10	-3.41e-10	-3.55e-10	-3.15e-10	-3.55e-10	-3.27e-10	-3.36e-10	-3.63e-10	0.099495	1.6975e-11	1.08035e-11	1.85217e-11	-7.71191e-12	7.71867e-12	1.08058e-11	-1.53596e-12	2.00638e-11	-9.26026e-12
0.1005	-7.71642e-12	-3.08645e-11	-7.72092e-12	1.12606e-15	-9.25351e-12	-1.08019e-11	-1.08024e-11	-3.24078e-11	-4.47518e-11	0.1005	-1.31e-10	-1.22e-10	-1.16e-10	-1.44e-10	-1.5e-10	-1.51e-10	-1.7e-10	-1.79e-10	-1.4e-10	0.1005	-6.33e-11	-6.02e-11	-9.26e-11	-1.05e-10	-8.18e-11	-7.72e-11	-9.26e-11	-9.72e-11	-1.25e-10	0.1005	-3.16e-10	-3.43e-10	-3.33e-10	-3.38e-10	-3.15e-10	-3.44e-10	-3.49e-10	-3.23e-10	-3.67e-10	0.1005	1.69795e-11	1.07979e-11	2.00638e-11	-4.62985e-12	1.07979e-11	2.00587e-11	-3.37817e-15	1.85222e-11	-9.25463e-12
0.101505	-1.54283e-11	-2.46937e-11	-6.17144e-12	-5.63029e-16	-1.54216e-12	-1.85177e-11	-1.3889e-11	-3.24073e-11	-4.01226e-11	0.101505	-1.2e-10	-1.25e-10	-1.2e-10	-1.36e-10	-1.57e-10	-1.56e-10	-1.61e-10	-1.81e-10	-1.54e-10	0.101505	-7.56e-11	-6.33e-11	-9.57e-11	-1.02e-10	-8.95e-11	-8.18e-11	-8.95e-11	-1.13e-10	-1.19e-10	0.101505	-3.15e-10	-3.52e-10	-3.3e-10	-3.29e-10	-3.1e-10	-3.49e-10	-3.55e-10	-3.23e-10	-3.56e-10	0.101505	2.62291e-11	-3.07925e-12	2.46903e-11	-1.54441e-12	3.37817e-15	1.85228e-11	-7.71473e-12	2.46863e-11	4.61915e-12
0.10251	-1.08064e-11	-2.1606e-11	-2.25211e-15	-1.54047e-12	9.25126e-12	-2.1606e-11	-1.54351e-11	-2.77752e-11	-2.77785e-11	0.10251	-1.14e-10	-1.19e-10	-1.2e-10	-1.33e-10	-1.59e-10	-1.48e-10	-1.64e-10	-1.74e-10	-1.5e-10	0.10251	-6.48e-11	-7.41e-11	-8.64e-11	-1.02e-10	-9.57e-11	-8.33e-11	-8.64e-11	-1.06e-10	-1.16e-10	0.10251	-2.96e-10	-3.47e-10	-3.13e-10	-3.4e-10	-3.16e-10	-3.44e-10	-3.44e-10	-3.23e-10	-3.46e-10	0.10251	1.69812e-11	3.08037e-12	2.31493e-11	-1.54328e-12	-1.54385e-12	2.62313e-11	-1.08002e-11	1.38918e-11	-1.079e-11
0.103515	-1.54311e-11	-1.85211e-11	-5.63029e-16	4.62478e-12	-3.08094e-12	-2.46914e-11	-2.3147e-11	-1.23508e-11	-1.38969e-11	0.103515	-1.17e-10	-1.37e-10	-1.22e-10	-1.23e-10	-1.64e-10	-1.59e-10	-1.54e-10	-1.79e-10	-1.51e-10	0.103515	-8.02e-11	-7.25e-11	-8.33e-11	-1.13e-10	-1.08e-10	-8.03e-11	-8.64e-11	-9.72e-11	-1.19e-10	0.103515	-2.93e-10	-3.53e-10	-3.04e-10	-3.35e-10	-3.16e-10	-3.44e-10	-3.53e-10	-3.27e-10	-3.5e-10	0.103515	2.16026e-11	-7.71473e-12	2.16026e-11	-1.53878e-12	-4.63379e-12	2.1606e-11	-6.17482e-12	9.26195e-12	9.25182e-12
0.10452	-1.54368e-11	-2.00576e-11	-1.54216e-12	-3.08319e-12	5.63029e-16	-2.46959e-11	-2.46931e-11	-9.26026e-12	-2.00565e-11	0.10452	-1.11e-10	-1.37e-10	-1.27e-10	-1.17e-10	-1.71e-10	-1.62e-10	-1.51e-10	-1.68e-10	-1.61e-10	0.10452	-7.72e-11	-6.48e-11	-7.25e-11	-1.08e-10	-1.06e-10	-9.41e-11	-7.72e-11	-9.26e-11	-1.17e-10	0.10452	-2.96e-10	-3.52e-10	-3.01e-10	-3.32e-10	-3.36e-10	-3.21e-10	-3.44e-10	-3.3e-10	-3.4e-10	0.10452	1.69767e-11	-1.38856e-11	1.08086e-11	1.07979e-11	-1.85098e-11	1.69806e-11	-6.16863e-12	1.08002e-11	7.71811e-12
0.105525	-2.62341e-11	-7.71754e-12	-5.63029e-16	-1.54385e-12	4.62647e-12	-3.39466e-11	-2.77791e-11	-7.71473e-12	-9.26364e-12	0.105525	-1.05e-10	-1.4e-10	-1.19e-10	-1.27e-10	-1.59e-10	-1.64e-10	-1.47e-10	-1.64e-10	-1.65e-10	0.105525	-8.64e-11	-7.56e-11	-7.72e-11	-8.95e-11	-1.1e-10	-8.95e-11	-8.49e-11	-9.11e-11	-1.08e-10	0.105525	-2.98e-10	-3.58e-10	-3.19e-10	-3.3e-10	-3.55e-10	-3.32e-10	-3.53e-10	-3.38e-10	-3.41e-10	0.105525	1.38901e-11	-9.26308e-12	1.54295e-11	9.26083e-12	-6.17989e-12	2.46875e-11	6.16807e-12	4.62985e-12	1.08035e-11
0.10653	-3.24056e-11	1.53653e-12	1.12606e-15	-1.54554e-12	-5.06726e-15	-2.77808e-11	-3.08645e-11	-1.54497e-12	-9.25632e-12	0.10653	-1.05e-10	-1.37e-10	-1.27e-10	-1.36e-10	-1.64e-10	-1.7e-10	-1.44e-10	-1.67e-10	-1.59e-10	0.10653	-8.18e-11	-8.18e-11	-7.1e-11	-9.41e-11	-1.22e-10	-1e-10	-8.33e-11	-8.95e-11	-1.16e-10	0.10653	-3.01e-10	-3.44e-10	-3.19e-10	-3.32e-10	-3.56e-10	-3.27e-10	-3.56e-10	-3.3e-10	-3.49e-10	0.10653	1.23457e-11	-1.38822e-11	1.07996e-11	1.08069e-11	-1.23423e-11	1.85183e-11	4.63041e-12	-1.54272e-12	1.54306e-11
0.107535	-2.93196e-11	-7.71022e-12	3.08431e-12	-7.71698e-12	-1.85104e-11	-2.62347e-11	-3.08645e-11	5.63029e-16	-1.12606e-15	0.107535	-9.88e-11	-1.33e-10	-1.34e-10	-1.22e-10	-1.65e-10	-1.73e-10	-1.5e-10	-1.5e-10	-1.73e-10	0.107535	-8.8e-11	-8.95e-11	-6.79e-11	-9.57e-11	-1.14e-10	-1.02e-10	-8.64e-11	-8.49e-11	-9.88e-11	0.107535	-3.15e-10	-3.38e-10	-3.15e-10	-3.23e-10	-3.49e-10	-3.13e-10	-3.55e-10	-3.21e-10	-3.3e-10	0.107535	9.26026e-12	1.53991e-12	-3.08263e-12	2.31459e-11	-7.71529e-12	9.26252e-12	4.63323e-12	-6.17201e-12	1.38901e-11
0.10854	-1.85245e-11	-5.63029e-16	0	-1.5434e-11	-1.23508e-11	-2.16054e-11	-2.77825e-11	3.08431e-12	6.16976e-12	0.10854	-1.02e-10	-1.3e-10	-1.42e-10	-1.34e-10	-1.44e-10	-1.74e-10	-1.42e-10	-1.5e-10	-1.68e-10	0.10854	-9.41e-11	-8.95e-11	-6.64e-11	-8.49e-11	-1.1e-10	-1.1e-10	-8.95e-11	-8.49e-11	-9.41e-11	0.10854	-3.21e-10	-3.35e-10	-3.21e-10	-3.3e-10	-3.53e-10	-3.12e-10	-3.41e-10	-3.29e-10	-3.4e-10	0.10854	7.7136e-12	7.71417e-12	-6.17144e-12	2.62319e-11	-5.63029e-16	7.71417e-12	1.38873e-11	-7.71754e-12	1.38901e-11
0.109545	-2.16037e-11	6.16863e-12	-3.08544e-12	-2.62324e-11	-1.85188e-11	-1.54357e-11	-3.3946e-11	-2.81514e-15	3.08544e-12	0.109545	-1.08e-10	-1.27e-10	-1.44e-10	-1.4e-10	-1.57e-10	-1.7e-10	-1.44e-10	-1.4e-10	-1.7e-10	0.109545	-1.03e-10	-9.57e-11	-8.18e-11	-8.49e-11	-1.08e-10	-1.11e-10	-9.11e-11	-9.57e-11	-9.57e-11	0.109545	-3.19e-10	-3.23e-10	-3.4e-10	-3.33e-10	-3.64e-10	-3.07e-10	-3.27e-10	-3.4e-10	-3.24e-10	0.109545	-1.54047e-12	7.71642e-12	-4.63379e-12	1.85239e-11	6.17144e-12	3.37817e-15	1.69744e-11	-1.23435e-11	1.54311e-11
0.11055	-1.85149e-11	2.25211e-15	-3.09051e-12	-2.77769e-11	-2.31476e-11	-1.69722e-11	-2.31509e-11	-1.07974e-11	-3.086e-12	0.11055	-1.1e-10	-1.23e-10	-1.39e-10	-1.36e-10	-1.44e-10	-1.73e-10	-1.48e-10	-1.45e-10	-1.84e-10	0.11055	-1.02e-10	-9.88e-11	-8.33e-11	-8.64e-11	-1.02e-10	-1.16e-10	-8.34e-11	-9.57e-11	-8.49e-11	0.11055	-3.33e-10	-3.21e-10	-3.38e-10	-3.26e-10	-3.66e-10	-3.18e-10	-3.38e-10	-3.41e-10	-3.29e-10	0.11055	-3.08769e-12	7.72036e-12	-1.3885e-11	2.31464e-11	7.71867e-12	1.54272e-12	1.54357e-11	-9.26139e-12	1.23429e-11
0.111555	-3.09501e-12	0	-1.38856e-11	-2.31521e-11	-2.31498e-11	-7.71698e-12	-1.69744e-11	-6.17257e-12	-7.7136e-12	0.111555	-1.06e-10	-1.08e-10	-1.44e-10	-1.48e-10	-1.37e-10	-1.62e-10	-1.64e-10	-1.4e-10	-1.65e-10	0.111555	-9.41e-11	-1.06e-10	-8.49e-11	-8.18e-11	-1.02e-10	-1.11e-10	-1.13e-10	-8.8e-11	-8.95e-11	0.111555	-3.41e-10	-3.21e-10	-3.35e-10	-3.24e-10	-3.77e-10	-3.19e-10	-3.27e-10	-3.41e-10	-3.3e-10	0.111555	-7.71191e-12	1.85171e-11	-1.0803e-11	2.00638e-11	1.54306e-11	1.54216e-12	2.16065e-11	-1.08013e-11	2.81514e-15
0.11256	-1.07979e-11	-2.25211e-15	-1.38912e-11	-2.62347e-11	-2.46931e-11	-1.68909e-15	-6.17426e-12	-4.50423e-15	-4.63267e-12	0.11256	-1.17e-10	-1.05e-10	-1.51e-10	-1.44e-10	-1.27e-10	-1.59e-10	-1.65e-10	-1.39e-10	-1.62e-10	0.11256	-9.41e-11	-9.41e-11	-8.95e-11	-7.56e-11	-9.57e-11	-1.16e-10	-1.05e-10	-9.72e-11	-8.64e-11	0.11256	-3.41e-10	-3.15e-10	-3.55e-10	-3.1e-10	-3.66e-10	-3.19e-10	-3.33e-10	-3.53e-10	-3.36e-10	0.11256	-2.81514e-15	2.31464e-11	-7.71473e-12	2.00621e-11	1.69778e-11	-1.54385e-12	2.9319e-11	-7.71473e-12	-4.62704e-12
0.113565	-4.62872e-12	-6.16919e-12	-1.85222e-11	-2.62353e-11	-2.77774e-11	3.08431e-12	1.53934e-12	-6.17651e-12	-9.26139e-12	0.113565	-1.17e-10	-1.1e-10	-1.48e-10	-1.5e-10	-1.31e-10	-1.57e-10	-1.59e-10	-1.53e-10	-1.59e-10	0.113565	-8.33e-11	-9.72e-11	-9.72e-11	-7.56e-11	-8.18e-11	-1.08e-10	-1.16e-10	-1.02e-10	-1.02e-10	0.113565	-3.47e-10	-3.13e-10	-3.46e-10	-3.38e-10	-3.5e-10	-3.18e-10	-3.36e-10	-3.64e-10	-3.38e-10	0.113565	-5.63029e-16	2.00649e-11	-3.9412e-15	1.85188e-11	2.31453e-11	-6.17595e-12	2.77769e-11	0	-1.54441e-12
0.11457	4.62816e-12	-1.54835e-12	-3.08589e-11	-2.46897e-11	-2.62347e-11	5.63029e-16	-1.54385e-12	-2.15998e-11	-1.85171e-11	0.11457	-1.2e-10	-9.88e-11	-1.34e-10	-1.54e-10	-1.3e-10	-1.45e-10	-1.79e-10	-1.42e-10	-1.44e-10	0.11457	-7.56e-11	-9.26e-11	-8.64e-11	-8.49e-11	-7.87e-11	-9.88e-11	-9.88e-11	-1.06e-10	-1.13e-10	0.11457	-3.47e-10	-3.18e-10	-3.56e-10	-3.52e-10	-3.56e-10	-3.3e-10	-3.16e-10	-3.63e-10	-3.49e-10	0.11457	-1.54216e-12	2.31476e-11	-3.08431e-12	1.54317e-11	1.85222e-11	-1.85104e-11	2.00627e-11	7.71304e-12	-1.54835e-12
0.115575	9.25632e-12	-1.08019e-11	-2.46965e-11	-1.54362e-11	-2.16054e-11	-1.54103e-12	-6.16694e-12	-2.00672e-11	-2.16037e-11	0.115575	-1.13e-10	-9.72e-11	-1.36e-10	-1.64e-10	-1.4e-10	-1.44e-10	-1.85e-10	-1.47e-10	-1.45e-10	0.115575	-7.1e-11	-8.33e-11	-9.57e-11	-8.64e-11	-8.18e-11	-9.88e-11	-1.17e-10	-1.08e-10	-9.88e-11	0.115575	-3.66e-10	-3.12e-10	-3.58e-10	-3.72e-10	-3.55e-10	-3.32e-10	-3.27e-10	-3.6e-10	-3.63e-10	0.115575	-5.63029e-16	2.16065e-11	2.81514e-15	9.25914e-12	2.16037e-11	-6.17313e-12	1.23519e-11	6.17539e-12	-1.54272e-11
0.11658	4.6321e-12	-1.69789e-11	-2.93162e-11	-1.54311e-11	-1.54323e-11	3.08657e-12	6.16638e-12	-3.08584e-11	-1.85233e-11	0.11658	-1.25e-10	-1.06e-10	-1.37e-10	-1.56e-10	-1.27e-10	-1.47e-10	-1.68e-10	-1.56e-10	-1.37e-10	0.11658	-6.79e-11	-8.64e-11	-1e-10	-8.8e-11	-8.95e-11	-8.03e-11	-1.06e-10	-1.13e-10	-1.03e-10	0.11658	-3.46e-10	-3.1e-10	-3.55e-10	-3.55e-10	-3.35e-10	-3.44e-10	-3.35e-10	-3.56e-10	-3.6e-10	0.11658	2.81514e-15	2.1606e-11	1.08035e-11	1.54835e-12	1.85171e-11	6.17144e-12	2.00582e-11	1.0803e-11	-1.38867e-11
0.117585	6.1737e-12	-3.08561e-11	-1.69823e-11	-1.0803e-11	-7.72036e-12	7.71417e-12	2.81514e-15	-2.16116e-11	-2.62336e-11	0.117585	-1.28e-10	-1.06e-10	-1.36e-10	-1.48e-10	-1.39e-10	-1.23e-10	-1.71e-10	-1.64e-10	-1.36e-10	0.117585	-6.02e-11	-7.72e-11	-1.02e-10	-9.57e-11	-8.18e-11	-8.33e-11	-1.13e-10	-1.27e-10	-1.14e-10	0.117585	-3.4e-10	-3.18e-10	-3.6e-10	-3.6e-10	-3.29e-10	-3.53e-10	-3.21e-10	-3.47e-10	-3.77e-10	0.117585	7.71867e-12	2.16032e-11	2.31397e-11	7.71135e-12	9.26477e-12	1.38867e-11	1.54323e-11	1.54311e-11	-4.63492e-12
0.11859	9.25238e-12	-1.85278e-11	-2.1602e-11	-6.17144e-12	-1.07985e-11	6.16694e-12	1.54047e-12	-2.7778e-11	-2.77808e-11	0.11859	-1.2e-10	-1.1e-10	-1.17e-10	-1.42e-10	-1.37e-10	-1.36e-10	-1.76e-10	-1.61e-10	-1.44e-10	0.11859	-5.86e-11	-7.56e-11	-1.03e-10	-1.08e-10	-7.72e-11	-8.18e-11	-9.88e-11	-1.17e-10	-1.13e-10	0.11859	-3.32e-10	-3.24e-10	-3.4e-10	-3.64e-10	-3.29e-10	-3.64e-10	-3.44e-10	-3.38e-10	-3.78e-10	0.11859	2.15975e-11	1.38918e-11	9.26477e-12	5.63029e-16	1.38873e-11	1.38935e-11	9.25914e-12	1.54334e-11	-9.25745e-12
0.119595	-7.70797e-12	-2.93201e-11	-1.54334e-11	3.08206e-12	-1.54385e-12	-1.23361e-11	-4.62929e-12	-3.08645e-11	-3.39472e-11	0.119595	-1.25e-10	-1.11e-10	-1.23e-10	-1.34e-10	-1.45e-10	-1.33e-10	-1.67e-10	-1.65e-10	-1.4e-10	0.119595	-5.86e-11	-7.1e-11	-1.11e-10	-9.88e-11	-8.33e-11	-9.41e-11	-1e-10	-1.13e-10	-1.25e-10	0.119595	-3.29e-10	-3.3e-10	-3.3e-10	-3.49e-10	-3.04e-10	-3.55e-10	-3.44e-10	-3.3e-10	-3.84e-10	0.119595	1.23547e-11	1.2344e-11	9.26252e-12	-6.17088e-12	1.23412e-11	2.46824e-11	1.54272e-12	1.69772e-11	-7.71473e-12
0.1206	-1.5461e-12	-3.395e-11	-1.08041e-11	3.9412e-15	6.16919e-12	-3.0967e-12	-9.25857e-12	-3.08634e-11	-2.62398e-11	0.1206	-1.22e-10	-1.13e-10	-1.16e-10	-1.34e-10	-1.39e-10	-1.4e-10	-1.59e-10	-1.64e-10	-1.37e-10	0.1206	-5.71e-11	-6.64e-11	-9.88e-11	-1.02e-10	-9.26e-11	-8.03e-11	-9.57e-11	-1.16e-10	-1.25e-10	0.1206	-3.09e-10	-3.4e-10	-3.18e-10	-3.6e-10	-3.19e-10	-3.47e-10	-3.46e-10	-3.26e-10	-3.77e-10	0.1206	2.62313e-11	4.63041e-12	1.69694e-11	-6.17313e-12	-3.08375e-12	7.72599e-12	-7.71135e-12	2.16037e-11	-1.54328e-12
0.121605	-3.08938e-12	-3.24061e-11	-9.2597e-12	7.7136e-12	3.08657e-12	-2.15992e-11	-1.08007e-11	-2.46925e-11	-2.93196e-11	0.121605	-1.2e-10	-1.22e-10	-1.19e-10	-1.31e-10	-1.51e-10	-1.5e-10	-1.54e-10	-1.71e-10	-1.48e-10	0.121605	-6.17e-11	-6.64e-11	-9.41e-11	-1.08e-10	-1e-10	-8.03e-11	-9.41e-11	-1.16e-10	-1.23e-10	0.121605	-3.07e-10	-3.4e-10	-3.21e-10	-3.49e-10	-3.32e-10	-3.47e-10	-3.47e-10	-3.19e-10	-3.8e-10	0.121605	2.77774e-11	-1.53934e-12	6.18045e-12	-6.16919e-12	-1.07962e-11	1.69727e-11	-3.09051e-12	2.00616e-11	4.62929e-12
0.12261	-1.23457e-11	-2.31515e-11	-7.71135e-12	7.71811e-12	5.63029e-16	-2.16099e-11	-6.18045e-12	-1.85228e-11	-2.46937e-11	0.12261	-1.17e-10	-1.2e-10	-1.14e-10	-1.27e-10	-1.51e-10	-1.47e-10	-1.51e-10	-1.65e-10	-1.51e-10	0.12261	-6.64e-11	-6.95e-11	-8.49e-11	-1.13e-10	-9.57e-11	-8.18e-11	-9.11e-11	-1.05e-10	-1.2e-10	0.12261	-3.02e-10	-3.49e-10	-3.21e-10	-3.33e-10	-3.24e-10	-3.3e-10	-3.66e-10	-3.29e-10	-3.78e-10	0.12261	2.46937e-11	3.08263e-12	1.54289e-11	4.62366e-12	-7.8824e-15	1.69795e-11	-9.25801e-12	1.54351e-11	9.26139e-12
0.123615	-2.00593e-11	-2.0061e-11	7.71079e-12	1.23412e-11	-1.54159e-12	-3.24073e-11	-2.16015e-11	-2.16032e-11	-2.31464e-11	0.123615	-1.02e-10	-1.23e-10	-1.11e-10	-1.27e-10	-1.64e-10	-1.59e-10	-1.48e-10	-1.62e-10	-1.39e-10	0.123615	-7.25e-11	-7.87e-11	-7.1e-11	-1.08e-10	-1.14e-10	-7.72e-11	-8.64e-11	-1e-10	-1.19e-10	0.123615	-2.99e-10	-3.58e-10	-3.12e-10	-3.5e-10	-3.38e-10	-3.4e-10	-3.89e-10	-3.24e-10	-3.56e-10	0.123615	2.46914e-11	-3.086e-12	1.38907e-11	-1.53822e-12	-1.07985e-11	2.62308e-11	-1.08013e-11	1.69699e-11	1.85132e-11
0.12462	-1.852e-11	-1.23513e-11	7.71585e-12	3.08713e-12	1.53991e-12	-3.85804e-11	-2.46942e-11	-1.69705e-11	-1.38918e-11	0.12462	-9.41e-11	-1.36e-10	-1.2e-10	-1.22e-10	-1.62e-10	-1.56e-10	-1.39e-10	-1.57e-10	-1.53e-10	0.12462	-8.64e-11	-8.03e-11	-7.72e-11	-1.13e-10	-1e-10	-8.95e-11	-8.49e-11	-9.88e-11	-1.08e-10	0.12462	-2.99e-10	-3.6e-10	-3.26e-10	-3.24e-10	-3.4e-10	-3.35e-10	-3.81e-10	-3.26e-10	-3.36e-10	0.12462	2.16048e-11	-7.71135e-12	1.54306e-11	6.1737e-12	-9.26083e-12	2.16071e-11	-7.71529e-12	1.54948e-12	1.08092e-11
0.125625	-1.85228e-11	-1.85132e-11	6.17313e-12	-4.6276e-12	-4.62985e-12	-4.01231e-11	-3.24056e-11	3.07756e-12	-1.0803e-11	0.125625	-9.88e-11	-1.27e-10	-1.22e-10	-1.31e-10	-1.65e-10	-1.59e-10	-1.47e-10	-1.51e-10	-1.7e-10	0.125625	-8.18e-11	-8.8e-11	-6.95e-11	-9.72e-11	-1.06e-10	-8.8e-11	-9.57e-11	-8.8e-11	-9.88e-11	0.125625	-2.87e-10	-3.46e-10	-3.15e-10	-3.32e-10	-3.47e-10	-3.19e-10	-3.61e-10	-3.09e-10	-3.47e-10	0.125625	1.54357e-11	1.53822e-12	1.08041e-11	1.54317e-11	-1.08035e-11	2.00616e-11	-1.54272e-12	3.08431e-12	2.00554e-11
0.12663	-2.77774e-11	-7.71529e-12	4.63098e-12	-6.17482e-12	-1.08013e-11	-3.5491e-11	-3.08629e-11	-1.54103e-12	-7.71585e-12	0.12663	-1.05e-10	-1.31e-10	-1.19e-10	-1.23e-10	-1.59e-10	-1.59e-10	-1.48e-10	-1.53e-10	-1.64e-10	0.12663	-8.18e-11	-8.33e-11	-6.94e-11	-9.88e-11	-1.19e-10	-9.88e-11	-8.33e-11	-8.95e-11	-1.02e-10	0.12663	-3.09e-10	-3.46e-10	-2.96e-10	-3.03e-10	-3.4e-10	-3.12e-10	-3.61e-10	-3.29e-10	-3.33e-10	0.12663	1.69744e-11	-3.08319e-12	9.25801e-12	2.16043e-11	-1.38879e-11	1.54328e-11	6.16807e-12	-1.54103e-12	9.26139e-12
0.127635	-3.24028e-11	6.16807e-12	6.16807e-12	-1.23451e-11	-1.23491e-11	-1.85273e-11	-2.16093e-11	2.25211e-15	-3.08657e-12	0.127635	-9.88e-11	-1.22e-10	-1.22e-10	-1.27e-10	-1.47e-10	-1.57e-10	-1.54e-10	-1.44e-10	-1.64e-10	0.127635	-8.64e-11	-9.26e-11	-6.79e-11	-8.95e-11	-1.16e-10	-9.88e-11	-8.95e-11	-8.33e-11	-9.57e-11	0.127635	-3.04e-10	-3.41e-10	-3.09e-10	-3.23e-10	-3.44e-10	-3.12e-10	-3.43e-10	-3.33e-10	-3.38e-10	0.127635	1.3885e-11	1.54216e-12	3.09107e-12	2.31487e-11	-1.23446e-11	1.08019e-11	6.75634e-15	-6.75634e-15	3.09163e-12
0.12864	-2.00666e-11	6.17201e-12	-6.16919e-12	-1.54357e-11	-2.16054e-11	-2.31459e-11	-2.16043e-11	7.71248e-12	1.54047e-12	0.12864	-9.88e-11	-1.22e-10	-1.22e-10	-1.28e-10	-1.39e-10	-1.62e-10	-1.5e-10	-1.44e-10	-1.76e-10	0.12864	-9.88e-11	-1e-10	-7.41e-11	-8.33e-11	-1e-10	-1.1e-10	-8.64e-11	-8.03e-11	-9.57e-11	0.12864	-3.04e-10	-3.41e-10	-3.12e-10	-3.24e-10	-3.53e-10	-3.16e-10	-3.44e-10	-3.35e-10	-3.4e-10	0.12864	-1.53709e-12	3.08882e-12	9.25182e-12	2.3147e-11	-6.17144e-12	3.09163e-12	1.23406e-11	-1.69694e-11	1.08002e-11
0.129645	-1.852e-11	3.08995e-12	-7.71417e-12	-2.62274e-11	-2.93168e-11	-1.852e-11	-1.69778e-11	4.62985e-12	-1.53991e-12	0.129645	-1.02e-10	-1.11e-10	-1.5e-10	-1.37e-10	-1.39e-10	-1.62e-10	-1.47e-10	-1.31e-10	-1.7e-10	0.129645	-8.33e-11	-8.95e-11	-7.41e-11	-9.1e-11	-1.13e-10	-1.13e-10	-8.95e-11	-8.33e-11	-7.72e-11	0.129645	-3.15e-10	-3.27e-10	-3.33e-10	-3.16e-10	-3.72e-10	-3.21e-10	-3.35e-10	-3.49e-10	-3.32e-10	0.129645	-5.63029e-16	1.08013e-11	-6.16413e-12	1.69795e-11	4.62929e-12	9.2552e-12	9.26195e-12	-1.54311e-11	1.08024e-11
0.13065	-1.85183e-11	9.25632e-12	-3.09276e-12	-1.38974e-11	-2.16161e-11	-1.54306e-11	-1.69761e-11	1.54441e-12	4.62647e-12	0.13065	-1.05e-10	-1.19e-10	-1.4e-10	-1.42e-10	-1.37e-10	-1.62e-10	-1.48e-10	-1.37e-10	-1.64e-10	0.13065	-8.64e-11	-1.08e-10	-7.25e-11	-8.18e-11	-1.02e-10	-1.02e-10	-9.41e-11	-8.95e-11	-8.8e-11	0.13065	-3.12e-10	-3.18e-10	-3.43e-10	-3.19e-10	-3.72e-10	-3.18e-10	-3.41e-10	-3.64e-10	-3.43e-10	0.13065	-1.68909e-15	1.38912e-11	3.08037e-12	2.00604e-11	1.38884e-11	3.08488e-12	1.23519e-11	-9.26308e-12	9.25914e-12
0.131655	-1.54289e-11	6.17144e-12	-1.54306e-11	-2.31459e-11	-4.16546e-11	-6.17539e-12	-1.69711e-11	1.53934e-12	1.54497e-12	0.131655	-1.05e-10	-1.13e-10	-1.51e-10	-1.47e-10	-1.33e-10	-1.53e-10	-1.59e-10	-1.42e-10	-1.62e-10	0.131655	-8.8e-11	-1.06e-10	-8.49e-11	-7.72e-11	-1.05e-10	-1.13e-10	-1.02e-10	-9.41e-11	-9.26e-11	0.131655	-3.38e-10	-3.02e-10	-3.44e-10	-3.27e-10	-3.66e-10	-3.13e-10	-3.29e-10	-3.58e-10	-3.56e-10	0.131655	-4.6276e-12	2.16003e-11	-4.6276e-12	1.69772e-11	2.00582e-11	-7.71529e-12	3.08561e-11	-1.23418e-11	6.1737e-12
0.13266	-1.5461e-12	-1.53991e-12	-2.16065e-11	-2.31493e-11	-2.31554e-11	-3.08657e-12	-3.09276e-12	-9.25801e-12	3.08094e-12	0.13266	-1.16e-10	-9.72e-11	-1.4e-10	-1.53e-10	-1.22e-10	-1.56e-10	-1.61e-10	-1.27e-10	-1.51e-10	0.13266	-8.64e-11	-9.26e-11	-8.64e-11	-7.41e-11	-9.41e-11	-1.17e-10	-1.13e-10	-9.11e-11	-9.72e-11	0.13266	-3.41e-10	-3.09e-10	-3.47e-10	-3.36e-10	-3.55e-10	-3.19e-10	-3.24e-10	-3.7e-10	-3.46e-10	0.13266	-3.08826e-12	1.38946e-11	-6.17313e-12	1.69756e-11	1.38941e-11	-1.54255e-11	2.31526e-11	-3.09107e-12	4.62591e-12
0.133665	4.62704e-12	-3.9412e-15	-2.93168e-11	-2.3147e-11	-2.16077e-11	3.37817e-15	-6.17144e-12	-1.54328e-11	-1.08007e-11	0.133665	-1.06e-10	-9.41e-11	-1.42e-10	-1.53e-10	-1.25e-10	-1.4e-10	-1.68e-10	-1.39e-10	-1.5e-10	0.133665	-8.18e-11	-9.88e-11	-9.11e-11	-8.33e-11	-8.18e-11	-1.06e-10	-1.02e-10	-1.06e-10	-9.72e-11	0.133665	-3.56e-10	-3.07e-10	-3.41e-10	-3.44e-10	-3.47e-10	-3.32e-10	-3.21e-10	-3.63e-10	-3.4e-10	0.133665	-6.16976e-12	2.00627e-11	-7.71079e-12	1.54323e-11	2.00593e-11	-3.08882e-12	2.4692e-11	-6.16919e-12	-7.71191e-12
0.13467	3.08713e-12	-9.2552e-12	-2.1611e-11	-1.69778e-11	-2.46863e-11	1.23356e-11	-4.62816e-12	-2.16043e-11	-1.85171e-11	0.13467	-1.16e-10	-1.03e-10	-1.44e-10	-1.6e-10	-1.33e-10	-1.4e-10	-1.57e-10	-1.25e-10	-1.47e-10	0.13467	-8.49e-11	-9.26e-11	-9.41e-11	-7.1e-11	-8.64e-11	-9.57e-11	-1.22e-10	-1.13e-10	-8.8e-11	0.13467	-3.36e-10	-3.13e-10	-3.47e-10	-3.63e-10	-3.55e-10	-3.27e-10	-3.13e-10	-3.64e-10	-3.5e-10	0.13467	-3.37817e-15	2.62313e-11	6.16525e-12	1.23463e-11	1.69806e-11	3.08206e-12	2.46892e-11	1.53991e-12	-7.71867e-12
0.135675	3.08713e-12	-6.17708e-12	-2.7778e-11	-1.54328e-11	-1.08092e-11	-4.6214e-12	1.54047e-12	-2.31521e-11	-2.00649e-11	0.135675	-1.3e-10	-9.88e-11	-1.37e-10	-1.39e-10	-1.25e-10	-1.37e-10	-1.7e-10	-1.4e-10	-1.37e-10	0.135675	-7.41e-11	-1e-10	-9.88e-11	-8.8e-11	-8.33e-11	-1.02e-10	-1.16e-10	-1.16e-10	-9.88e-11	0.135675	-3.46e-10	-3.09e-10	-3.47e-10	-3.52e-10	-3.49e-10	-3.32e-10	-3.18e-10	-3.61e-10	-3.53e-10	0.135675	-3.08319e-12	2.00627e-11	-1.53596e-12	9.25463e-12	2.62319e-11	-3.08206e-12	1.54345e-11	9.57149e-15	-1.38901e-11
0.13668	4.62647e-12	-1.38873e-11	-3.08645e-11	-1.38901e-11	-1.38867e-11	1.53934e-12	1.68909e-15	-3.2405e-11	-2.77763e-11	0.13668	-1.23e-10	-1.03e-10	-1.27e-10	-1.54e-10	-1.27e-10	-1.27e-10	-1.62e-10	-1.39e-10	-1.33e-10	0.13668	-6.94e-11	-8.03e-11	-1.02e-10	-8.95e-11	-7.25e-11	-8.33e-11	-1.19e-10	-1.17e-10	-9.57e-11	0.13668	-3.33e-10	-3.12e-10	-3.44e-10	-3.7e-10	-3.55e-10	-3.41e-10	-3.19e-10	-3.52e-10	-3.55e-10	0.13668	3.08713e-12	1.38929e-11	1.07968e-11	-7.70854e-12	2.46937e-11	3.08938e-12	1.08013e-11	2.46796e-11	-2.15964e-11
0.137685	-3.08319e-12	-1.54345e-11	-3.08617e-11	-1.38856e-11	-9.25914e-12	-3.08488e-12	3.08544e-12	-3.08657e-11	-2.77791e-11	0.137685	-1.33e-10	-9.26e-11	-1.19e-10	-1.37e-10	-1.25e-10	-1.36e-10	-1.65e-10	-1.44e-10	-1.27e-10	0.137685	-6.94e-11	-7.25e-11	-1.06e-10	-8.95e-11	-7.56e-11	-8.49e-11	-1.16e-10	-1.16e-10	-1.05e-10	0.137685	-3.53e-10	-3.27e-10	-3.3e-10	-3.77e-10	-3.4e-10	-3.41e-10	-3.24e-10	-3.52e-10	-3.63e-10	0.137685	1.08064e-11	1.69756e-11	6.17876e-12	-3.0922e-12	2.62319e-11	1.69699e-11	1.55004e-12	1.38935e-11	-3.09501e-12
0.13869	-1.54441e-12	-2.16048e-11	-2.00655e-11	-3.08769e-12	-3.08938e-12	-3.08938e-12	3.086e-12	-2.9323e-11	-2.77791e-11	0.13869	-1.31e-10	-1e-10	-1.19e-10	-1.37e-10	-1.2e-10	-1.34e-10	-1.65e-10	-1.54e-10	-1.33e-10	0.13869	-6.02e-11	-7.41e-11	-1.05e-10	-1.02e-10	-7.72e-11	-7.72e-11	-1.16e-10	-1.27e-10	-1.13e-10	0.13869	-3.27e-10	-3.32e-10	-3.47e-10	-3.73e-10	-3.19e-10	-3.56e-10	-3.24e-10	-3.44e-10	-3.73e-10	0.13869	2.77701e-11	1.85149e-11	1.69739e-11	-1.38817e-11	1.69767e-11	1.38935e-11	1.07996e-11	1.3889e-11	-7.71529e-12
0.139695	-3.08488e-12	-2.46903e-11	-1.6975e-11	4.62309e-12	-4.62704e-12	-1.08019e-11	1.54328e-12	-2.93213e-11	-2.77797e-11	0.139695	-1.22e-10	-1.02e-10	-1.1e-10	-1.36e-10	-1.34e-10	-1.31e-10	-1.59e-10	-1.57e-10	-1.34e-10	0.139695	-6.79e-11	-6.33e-11	-9.26e-11	-1e-10	-8.33e-11	-7.1e-11	-1.05e-10	-1.2e-10	-1.19e-10	0.139695	-3.16e-10	-3.36e-10	-3.19e-10	-3.55e-10	-3.36e-10	-3.46e-10	-3.38e-10	-3.41e-10	-3.78e-10	0.139695	2.00649e-11	7.71867e-12	2.16009e-11	-3.0967e-12	9.26026e-12	2.16043e-11	1.07985e-11	1.23485e-11	-9.25576e-12
0.1407	-5.63029e-15	-2.16077e-11	-1.08052e-11	-6.16694e-12	1.54328e-12	-1.54328e-11	-1.68909e-15	-2.62341e-11	-2.93179e-11	0.1407	-1.23e-10	-9.57e-11	-1.17e-10	-1.33e-10	-1.42e-10	-1.23e-10	-1.6e-10	-1.57e-10	-1.34e-10	0.1407	-6.02e-11	-7.56e-11	-9.88e-11	-1.14e-10	-9.72e-11	-8.02e-11	-9.72e-11	-1.08e-10	-1.23e-10	0.1407	-3.19e-10	-3.55e-10	-3.24e-10	-3.55e-10	-3.27e-10	-3.6e-10	-3.44e-10	-3.21e-10	-3.81e-10	0.1407	1.85222e-11	3.08826e-12	1.23513e-11	-2.00509e-11	3.08713e-12	2.46908e-11	-1.54047e-12	1.69744e-11	5.63029e-16
0.141705	-1.2344e-11	-2.31521e-11	-1.08002e-11	-1.12606e-15	7.71417e-12	-2.00621e-11	-6.17651e-12	-1.85222e-11	-1.85256e-11	0.141705	-1.14e-10	-1.17e-10	-1.14e-10	-1.22e-10	-1.44e-10	-1.44e-10	-1.45e-10	-1.62e-10	-1.47e-10	0.141705	-6.64e-11	-6.95e-11	-9.26e-11	-1.06e-10	-9.11e-11	-7.56e-11	-9.72e-11	-1.03e-10	-1.27e-10	0.141705	-3.02e-10	-3.47e-10	-3.26e-10	-3.5e-10	-3.12e-10	-3.47e-10	-3.6e-10	-3.27e-10	-3.58e-10	0.141705	2.46886e-11	3.086e-12	1.69756e-11	-4.63661e-12	-1.54047e-12	2.31509e-11	-6.17201e-12	1.69744e-11	1.07985e-11
0.14271	-1.85166e-11	-3.23999e-11	-3.08826e-12	3.0815e-12	7.7136e-12	-2.31487e-11	-2.15998e-11	-1.852e-11	-2.46897e-11	0.14271	-1.06e-10	-1.22e-10	-1.03e-10	-1.16e-10	-1.51e-10	-1.39e-10	-1.44e-10	-1.67e-10	-1.39e-10	0.14271	-7.87e-11	-6.94e-11	-8.49e-11	-1.08e-10	-9.41e-11	-7.72e-11	-9.57e-11	-1.11e-10	-1.2e-10	0.14271	-3.13e-10	-3.53e-10	-3.07e-10	-3.41e-10	-3.21e-10	-3.41e-10	-3.47e-10	-3.38e-10	-3.53e-10	0.14271	2.00655e-11	1.54103e-12	2.0061e-11	-7.71022e-12	1.53765e-12	2.62291e-11	-7.71698e-12	1.2348e-11	9.26139e-12
0.143715	-1.69812e-11	-1.69806e-11	1.68909e-15	-7.70797e-12	1.68909e-15	-2.4692e-11	-2.00672e-11	-2.00604e-11	-2.3147e-11	0.143715	-1.03e-10	-1.25e-10	-1.11e-10	-1.16e-10	-1.45e-10	-1.5e-10	-1.36e-10	-1.65e-10	-1.4e-10	0.143715	-6.95e-11	-7.25e-11	-7.41e-11	-1.16e-10	-1e-10	-8.8e-11	-8.64e-11	-9.72e-11	-1.2e-10	0.143715	-2.99e-10	-3.58e-10	-3.07e-10	-3.44e-10	-3.27e-10	-3.23e-10	-3.6e-10	-3.24e-10	-3.47e-10	0.143715	2.31487e-11	-6.16976e-12	1.85183e-11	6.16694e-12	-1.07974e-11	1.08109e-11	-1.08041e-11	1.23451e-11	1.23457e-11
0.14472	-2.93145e-11	-1.38924e-11	7.71135e-12	4.62309e-12	-3.08713e-12	-2.46942e-11	-3.08617e-11	-1.54317e-11	-1.54351e-11	0.14472	-9.41e-11	-1.3e-10	-1.16e-10	-1.19e-10	-1.5e-10	-1.51e-10	-1.37e-10	-1.54e-10	-1.5e-10	0.14472	-7.72e-11	-8.02e-11	-7.72e-11	-1.06e-10	-1.06e-10	-8.95e-11	-8.18e-11	-9.72e-11	-1.13e-10	0.14472	-3.12e-10	-3.64e-10	-3.09e-10	-3.35e-10	-3.33e-10	-3.33e-10	-3.61e-10	-3.23e-10	-3.41e-10	0.14472	2.46886e-11	-4.63098e-12	1.38912e-11	3.08995e-12	-7.71867e-12	1.69767e-11	-1.69722e-11	9.25745e-12	1.3889e-11
0.145725	-2.00706e-11	-1.85132e-11	1.54441e-12	-1.54272e-12	-7.71698e-12	-2.93201e-11	-3.08668e-11	-7.71754e-12	-1.38862e-11	0.145725	-1e-10	-1.3e-10	-1.11e-10	-1.22e-10	-1.44e-10	-1.62e-10	-1.33e-10	-1.57e-10	-1.51e-10	0.145725	-8.33e-11	-8.33e-11	-7.72e-11	-9.72e-11	-1.19e-10	-9.41e-11	-8.18e-11	-8.49e-11	-1.06e-10	0.145725	-3.06e-10	-3.56e-10	-3.12e-10	-3.24e-10	-3.32e-10	-3.24e-10	-3.46e-10	-3.21e-10	-3.4e-10	0.145725	1.54323e-11	-6.17144e-12	1.38867e-11	9.25914e-12	-1.08007e-11	2.46858e-11	-1.23423e-11	3.37817e-15	1.38879e-11
0.14673	-3.24022e-11	-6.17595e-12	-1.53991e-12	-6.17539e-12	-1.38907e-11	-2.77774e-11	-3.395e-11	-3.08713e-12	-3.09163e-12	0.14673	-8.8e-11	-1.31e-10	-1.13e-10	-1.17e-10	-1.4e-10	-1.62e-10	-1.42e-10	-1.45e-10	-1.54e-10	0.14673	-8.64e-11	-7.72e-11	-7.1e-11	-9.11e-11	-1.13e-10	-9.72e-11	-7.87e-11	-8.95e-11	-9.72e-11	0.14673	-3.07e-10	-3.44e-10	-3.06e-10	-3.3e-10	-3.38e-10	-3.19e-10	-3.6e-10	-3.21e-10	-3.4e-10	0.14673	4.63435e-12	-3.08544e-12	6.17032e-12	1.38907e-11	-7.71417e-12	1.38907e-11	3.08206e-12	-5.63029e-16	9.26477e-12
0.147735	-2.62353e-11	-1.54779e-12	4.62704e-12	-1.69722e-11	-2.31459e-11	-2.16133e-11	-3.08634e-11	-2.81514e-15	-6.17032e-12	0.147735	-8.33e-11	-1.19e-10	-1.19e-10	-1.3e-10	-1.37e-10	-1.64e-10	-1.39e-10	-1.4e-10	-1.57e-10	0.147735	-9.41e-11	-9.26e-11	-7.41e-11	-9.11e-11	-1.08e-10	-9.72e-11	-8.03e-11	-9.11e-11	-9.88e-11	0.147735	-3.13e-10	-3.6e-10	-3.18e-10	-3.24e-10	-3.49e-10	-3.13e-10	-3.46e-10	-3.35e-10	-3.4e-10	0.147735	6.16976e-12	3.086e-12	-9.249e-12	2.16026e-11	1.53878e-12	6.17539e-12	6.1737e-12	-1.54497e-12	1.85138e-11
0.14874	-1.8525e-11	-9.25463e-12	3.086e-12	-1.69761e-11	-2.31476e-11	-3.54865e-11	-2.16088e-11	-4.6276e-12	-1.54385e-12	0.14874	-8.95e-11	-1.06e-10	-1.22e-10	-1.31e-10	-1.37e-10	-1.68e-10	-1.39e-10	-1.25e-10	-1.57e-10	0.14874	-1.02e-10	-8.8e-11	-6.95e-11	-8.18e-11	-1.11e-10	-1.06e-10	-8.18e-11	-9.72e-11	-9.72e-11	0.14874	-3.01e-10	-3.29e-10	-3.21e-10	-3.24e-10	-3.41e-10	-3.07e-10	-3.58e-10	-3.46e-10	-3.47e-10	0.14874	-1.53822e-12	7.71473e-12	4.62309e-12	2.00638e-11	-1.54328e-12	4.62929e-12	1.08024e-11	-7.71585e-12	1.23474e-11
0.149745	-2.62291e-11	-3.086e-12	-5.63029e-15	-1.69812e-11	-1.85256e-11	-2.46908e-11	-2.00632e-11	-3.08657e-12	1.54159e-12	0.149745	-9.88e-11	-1.14e-10	-1.25e-10	-1.33e-10	-1.33e-10	-1.62e-10	-1.37e-10	-1.42e-10	-1.6e-10	0.149745	-1.05e-10	-9.57e-11	-7.56e-11	-8.18e-11	-1.11e-10	-1.16e-10	-9.57e-11	-8.64e-11	-9.11e-11	0.149745	-3.12e-10	-3.23e-10	-3.32e-10	-3.29e-10	-3.58e-10	-3.02e-10	-3.32e-10	-3.43e-10	-3.33e-10	0.149745	4.62478e-12	7.71698e-12	1.68909e-15	2.16071e-11	-4.62478e-12	1.54441e-12	1.38896e-11	-1.23451e-11	9.26083e-12
0.15075	-1.54362e-11	4.62704e-12	-1.85121e-11	-3.08612e-11	-3.0864e-11	-9.26477e-12	-2.00616e-11	-1.54666e-12	-5.63029e-16	0.15075	-9.88e-11	-1.11e-10	-1.34e-10	-1.28e-10	-1.22e-10	-1.45e-10	-1.34e-10	-1.36e-10	-1.5e-10	0.15075	-8.33e-11	-1e-10	-7.25e-11	-7.56e-11	-1.02e-10	-1.03e-10	-9.88e-11	-9.11e-11	-1.02e-10	0.15075	-3.21e-10	-3.21e-10	-3.46e-10	-3.36e-10	-3.47e-10	-3.07e-10	-3.29e-10	-3.4e-10	-3.43e-10	0.15075	-3.0815e-12	9.26026e-12	-5.63029e-16	2.62302e-11	6.17482e-12	1.54385e-12	1.69778e-11	-1.38867e-11	9.25576e-12
0.151755	-1.38856e-11	4.62816e-12	-1.69784e-11	-3.24101e-11	-3.85765e-11	-7.71642e-12	-1.69733e-11	-9.25463e-12	-3.08544e-12	0.151755	-1.02e-10	-1.13e-10	-1.36e-10	-1.34e-10	-1.22e-10	-1.51e-10	-1.4e-10	-1.27e-10	-1.47e-10	0.151755	-8.64e-11	-9.88e-11	-8.49e-11	-6.95e-11	-8.8e-11	-1.13e-10	-1e-10	-9.26e-11	-8.33e-11	0.151755	-3.3e-10	-3.06e-10	-3.47e-10	-3.43e-10	-3.44e-10	-3.23e-10	-3.26e-10	-3.47e-10	-3.41e-10	0.151755	3.08263e-12	1.23451e-11	-1.54047e-12	1.5439e-11	2.15998e-11	3.08544e-12	2.4688e-11	-7.71698e-12	-1.53709e-12
0.15276	-1.5461e-12	5.63029e-16	-2.16077e-11	-3.7032e-11	-3.08707e-11	-6.17257e-12	-6.17482e-12	-3.09389e-12	-3.08769e-12	0.15276	-1.1e-10	-9.88e-11	-1.42e-10	-1.45e-10	-1.13e-10	-1.4e-10	-1.48e-10	-1.22e-10	-1.44e-10	0.15276	-8.64e-11	-1.05e-10	-9.57e-11	-7.1e-11	-8.8e-11	-1.13e-10	-1.02e-10	-9.11e-11	-9.72e-11	0.15276	-3.4e-10	-3.21e-10	-3.49e-10	-3.3e-10	-3.5e-10	-3.1e-10	-3.18e-10	-3.61e-10	-3.49e-10	0.15276	-1.54047e-12	1.23485e-11	4.62478e-12	2.1602e-11	2.00638e-11	1.54272e-12	2.00638e-11	-3.08713e-12	4.6276e-12
0.153765	3.08488e-12	-3.08882e-12	-3.08612e-11	-2.31554e-11	-3.70315e-11	-3.08544e-12	-2.25211e-15	-1.69733e-11	-6.17201e-12	0.153765	-1.08e-10	-9.72e-11	-1.36e-10	-1.5e-10	-1.11e-10	-1.34e-10	-1.54e-10	-1.23e-10	-1.37e-10	0.153765	-8.03e-11	-9.41e-11	-9.57e-11	-7.72e-11	-8.49e-11	-1.02e-10	-9.88e-11	-1.06e-10	-1e-10	0.153765	-3.49e-10	-3.04e-10	-3.58e-10	-3.43e-10	-3.55e-10	-3.3e-10	-3.24e-10	-3.55e-10	-3.63e-10	0.153765	1.54216e-12	1.85171e-11	-3.0815e-12	1.69767e-11	2.16037e-11	-1.5461e-12	1.85183e-11	1.68909e-15	4.62422e-12
0.15477	3.08657e-12	-1.23423e-11	-2.77802e-11	-2.62302e-11	-2.31532e-11	3.08544e-12	-1.12606e-15	-2.31504e-11	-6.17482e-12	0.15477	-1.2e-10	-9.57e-11	-1.31e-10	-1.45e-10	-1.22e-10	-1.33e-10	-1.59e-10	-1.33e-10	-1.34e-10	0.15477	-7.25e-11	-8.95e-11	-1.05e-10	-8.03e-11	-8.95e-11	-1.08e-10	-1.13e-10	-1.11e-10	-9.41e-11	0.15477	-3.58e-10	-3.19e-10	-3.52e-10	-3.55e-10	-3.4e-10	-3.27e-10	-3.29e-10	-3.61e-10	-3.41e-10	0.15477	1.5461e-12	1.85171e-11	3.08319e-12	1.38862e-11	1.69778e-11	-1.23384e-11	1.38918e-11	7.71529e-12	-1.07962e-11
0.155775	3.086e-12	-1.08064e-11	-2.7778e-11	-1.38941e-11	-2.0061e-11	6.16919e-12	-3.08544e-12	-3.24084e-11	-1.08058e-11	0.155775	-1.17e-10	-8.8e-11	-1.28e-10	-1.54e-10	-1.19e-10	-1.36e-10	-1.61e-10	-1.4e-10	-1.34e-10	0.155775	-7.1e-11	-8.8e-11	-1.14e-10	-8.33e-11	-8.18e-11	-9.72e-11	-1.11e-10	-1.17e-10	-9.26e-11	0.155775	-3.53e-10	-3.13e-10	-3.53e-10	-3.5e-10	-3.15e-10	-3.41e-10	-3.27e-10	-3.67e-10	-3.66e-10	0.155775	9.25914e-12	1.23525e-11	5.06726e-15	1.5461e-12	1.69761e-11	-1.54891e-12	1.54328e-11	1.23468e-11	-7.71811e-12
0.15678	1.54441e-12	-1.852e-11	-2.46954e-11	-1.38862e-11	-1.2348e-11	-1.53991e-12	-3.08544e-12	-4.01197e-11	-2.31447e-11	0.15678	-1.19e-10	-9.72e-11	-1.25e-10	-1.48e-10	-1.28e-10	-1.34e-10	-1.61e-10	-1.47e-10	-1.34e-10	0.15678	-7.25e-11	-8.33e-11	-1.05e-10	-9.11e-11	-6.79e-11	-9.57e-11	-1.08e-10	-1.05e-10	-1.05e-10	0.15678	-3.43e-10	-3.16e-10	-3.4e-10	-3.64e-10	-3.15e-10	-3.46e-10	-3.26e-10	-3.53e-10	-3.55e-10	0.15678	1.54283e-11	2.31414e-11	1.07996e-11	-3.08431e-12	1.69733e-11	-6.16638e-12	1.6975e-11	1.8516e-11	-9.25857e-12
0.157785	3.08488e-12	-2.77746e-11	-2.93168e-11	-4.63435e-12	-9.26083e-12	-5.63029e-15	5.63029e-16	-3.24101e-11	-2.31498e-11	0.157785	-1.19e-10	-9.41e-11	-1.17e-10	-1.51e-10	-1.19e-10	-1.33e-10	-1.59e-10	-1.5e-10	-1.2e-10	0.157785	-5.4e-11	-7.41e-11	-1.02e-10	-9.72e-11	-8.02e-11	-8.03e-11	-1.11e-10	-1.23e-10	-1.06e-10	0.157785	-3.47e-10	-3.23e-10	-3.4e-10	-3.58e-10	-3.16e-10	-3.43e-10	-3.24e-10	-3.41e-10	-3.78e-10	0.157785	9.26083e-12	1.23513e-11	1.2344e-11	-1.54835e-12	9.26195e-12	7.71585e-12	1.54311e-11	1.54357e-11	-7.71754e-12
0.15879	-5.63029e-16	-2.46942e-11	-1.85233e-11	-7.71529e-12	-9.25407e-12	-1.38862e-11	4.62535e-12	-2.77819e-11	-2.46954e-11	0.15879	-1.19e-10	-1.03e-10	-1.08e-10	-1.36e-10	-1.22e-10	-1.36e-10	-1.62e-10	-1.6e-10	-1.19e-10	0.15879	-6.48e-11	-6.79e-11	-1.02e-10	-9.41e-11	-8.03e-11	-7.56e-11	-1.02e-10	-1.27e-10	-1.13e-10	0.15879	-3.29e-10	-3.24e-10	-3.3e-10	-3.63e-10	-3.16e-10	-3.53e-10	-3.27e-10	-3.33e-10	-3.73e-10	0.15879	6.17933e-12	1.54283e-11	7.72205e-12	-1.38834e-11	7.71754e-12	2.00576e-11	9.26026e-12	2.00638e-11	-9.25463e-12
0.159795	-4.62985e-12	-2.62369e-11	-1.85166e-11	-7.71529e-12	6.16863e-12	-1.85166e-11	-3.086e-12	-3.086e-11	-3.39477e-11	0.159795	-1.05e-10	-1.1e-10	-1.1e-10	-1.44e-10	-1.3e-10	-1.25e-10	-1.54e-10	-1.57e-10	-1.2e-10	0.159795	-5.4e-11	-7.41e-11	-1.06e-10	-1e-10	-8.18e-11	-8.49e-11	-1e-10	-1.16e-10	-1.23e-10	0.159795	-3.27e-10	-3.33e-10	-3.19e-10	-3.41e-10	-3.12e-10	-3.52e-10	-3.53e-10	-3.43e-10	-3.58e-10	0.159795	2.00559e-11	6.17595e-12	1.8516e-11	-9.2597e-12	9.25576e-12	1.85194e-11	4.63548e-12	2.77723e-11	3.08094e-12
0.1608	-9.25801e-12	-3.08617e-11	-1.08024e-11	-4.62591e-12	9.25857e-12	-1.54368e-11	-9.2597e-12	-1.85262e-11	-3.08629e-11	0.1608	-1.11e-10	-1.11e-10	-1e-10	-1.25e-10	-1.27e-10	-1.25e-10	-1.53e-10	-1.5e-10	-1.25e-10	0.1608	-7.1e-11	-7.1e-11	-9.72e-11	-1.02e-10	-8.18e-11	-8.64e-11	-9.26e-11	-1.06e-10	-1.22e-10	0.1608	-3.19e-10	-3.36e-10	-3.3e-10	-3.53e-10	-3.12e-10	-3.61e-10	-3.53e-10	-3.29e-10	-3.61e-10	0.1608	1.54373e-11	4.62647e-12	2.00599e-11	-4.62872e-12	3.37817e-15	1.69795e-11	1.54233e-11	1.69812e-11	1.12606e-15
0.161805	-9.26252e-12	-2.46976e-11	-1.5461e-12	9.25126e-12	9.25914e-12	-2.31481e-11	-1.54311e-11	-2.46908e-11	-2.00672e-11	0.161805	-1.05e-10	-1.19e-10	-1.1e-10	-1.22e-10	-1.42e-10	-1.36e-10	-1.5e-10	-1.64e-10	-1.25e-10	0.161805	-6.95e-11	-6.94e-11	-9.57e-11	-1.02e-10	-8.8e-11	-8.18e-11	-8.33e-11	-1.13e-10	-1.19e-10	0.161805	-3.04e-10	-3.36e-10	-3.15e-10	-3.46e-10	-3.18e-10	-3.53e-10	-3.55e-10	-3.27e-10	-3.49e-10	0.161805	2.31464e-11	-6.16525e-12	1.38924e-11	3.0815e-12	1.68909e-15	2.46892e-11	5.06726e-15	2.00593e-11	7.31937e-15
0.16281	-1.69733e-11	-3.23999e-11	5.63029e-16	3.9412e-15	7.7136e-12	-2.77757e-11	-1.69767e-11	-2.62319e-11	-2.16048e-11	0.16281	-9.57e-11	-1.25e-10	-1.02e-10	-1.22e-10	-1.37e-10	-1.33e-10	-1.47e-10	-1.59e-10	-1.39e-10	0.16281	-7.56e-11	-5.87e-11	-8.33e-11	-1.1e-10	-9.11e-11	-8.33e-11	-8.95e-11	-9.72e-11	-1.23e-10	0.16281	-3.09e-10	-3.43e-10	-3.04e-10	-3.44e-10	-3.19e-10	-3.4e-10	-3.47e-10	-3.27e-10	-3.73e-10	0.16281	2.31476e-11	4.62422e-12	1.54334e-11	-3.08094e-12	4.62366e-12	2.31509e-11	-1.54497e-12	1.38912e-11	2.00542e-11
0.163815	-1.69784e-11	-1.5439e-11	3.08488e-12	1.54103e-12	-1.54047e-12	-2.3156e-11	-2.0061e-11	-1.69778e-11	-2.0061e-11	0.163815	-1.05e-10	-1.23e-10	-1.13e-10	-1.2e-10	-1.42e-10	-1.39e-10	-1.3e-10	-1.71e-10	-1.34e-10	0.163815	-7.1e-11	-7.1e-11	-8.18e-11	-1.08e-10	-9.88e-11	-7.72e-11	-8.49e-11	-9.57e-11	-1.17e-10	0.163815	-3.09e-10	-3.61e-10	-3.23e-10	-3.29e-10	-3.24e-10	-3.36e-10	-3.63e-10	-3.33e-10	-3.49e-10	0.163815	1.85188e-11	-5.63029e-16	1.85149e-11	6.17088e-12	-7.7136e-12	2.62319e-11	-7.71473e-12	1.23474e-11	1.69772e-11
0.16482	-2.31481e-11	-1.54306e-11	1.54441e-12	-3.08826e-12	-3.08826e-12	-3.70264e-11	-1.85228e-11	-1.23457e-11	-1.38912e-11	0.16482	-9.41e-11	-1.23e-10	-1.02e-10	-1.2e-10	-1.44e-10	-1.51e-10	-1.36e-10	-1.51e-10	-1.37e-10	0.16482	-7.72e-11	-8.49e-11	-8.33e-11	-1.05e-10	-1.1e-10	-9.88e-11	-8.49e-11	-8.95e-11	-1.16e-10	0.16482	-3.06e-10	-3.55e-10	-3.21e-10	-3.29e-10	-3.38e-10	-3.21e-10	-3.66e-10	-3.46e-10	-3.41e-10	0.16482	1.23502e-11	-6.17032e-12	9.26252e-12	9.2597e-12	-1.23406e-11	1.85211e-11	-9.25689e-12	1.3885e-11	1.69733e-11
0.165825	-2.62386e-11	-9.25689e-12	3.086e-12	-1.23406e-11	-9.25745e-12	-1.69857e-11	-2.62364e-11	-6.17539e-12	-1.23451e-11	0.165825	-8.95e-11	-1.22e-10	-1.08e-10	-1.22e-10	-1.42e-10	-1.54e-10	-1.31e-10	-1.54e-10	-1.39e-10	0.165825	-8.64e-11	-8.03e-11	-7.72e-11	-9.41e-11	-1.1e-10	-8.49e-11	-8.18e-11	-9.11e-11	-1.11e-10	0.165825	-3.02e-10	-3.44e-10	-3.3e-10	-3.23e-10	-3.47e-10	-3.21e-10	-3.57e-10	-3.38e-10	-3.32e-10	0.165825	1.69739e-11	-4.63323e-12	7.71529e-12	1.23474e-11	-1.55173e-12	1.54323e-11	-3.08657e-12	3.08882e-12	9.26871e-12
0.16683	-3.70309e-11	4.62309e-12	3.08769e-12	-6.17708e-12	-9.26364e-12	-2.31487e-11	-3.54893e-11	-6.16919e-12	-7.71867e-12	0.16683	-9.11e-11	-1.19e-10	-9.88e-11	-1.2e-10	-1.47e-10	-1.6e-10	-1.3e-10	-1.48e-10	-1.47e-10	0.16683	-9.11e-11	-8.49e-11	-7.1e-11	-8.64e-11	-1.13e-10	-1.02e-10	-7.56e-11	-8.49e-11	-1.06e-10	0.16683	-3.07e-10	-3.55e-10	-3.26e-10	-3.12e-10	-3.43e-10	-3.13e-10	-3.55e-10	-3.46e-10	-3.36e-10	0.16683	1.54323e-11	-1.23389e-11	3.08882e-12	1.85177e-11	-1.38817e-11	1.0803e-11	3.086e-12	-1.53934e-12	2.62274e-11
0.167835	-2.62398e-11	2.25211e-15	6.16581e-12	-1.08035e-11	-2.00587e-11	-2.77785e-11	-2.77836e-11	4.62253e-12	-9.2552e-12	0.167835	-8.95e-11	-1.27e-10	-1.14e-10	-1.2e-10	-1.37e-10	-1.59e-10	-1.23e-10	-1.37e-10	-1.51e-10	0.167835	-9.11e-11	-9.11e-11	-6.48e-11	-9.41e-11	-1.13e-10	-1.11e-10	-8.64e-11	-8.64e-11	-8.8e-11	0.167835	-3.13e-10	-3.4e-10	-3.09e-10	-2.93e-10	-3.49e-10	-3.16e-10	-3.43e-10	-3.44e-10	-3.29e-10	0.167835	1.2344e-11	-2.81514e-15	4.6276e-12	2.00644e-11	-4.6321e-12	6.17708e-12	7.71811e-12	4.62253e-12	2.00644e-11
0.16884	-2.62319e-11	1.54272e-12	-1.07929e-11	-1.69756e-11	-2.0061e-11	-3.08589e-11	-3.24033e-11	-4.62647e-12	1.54047e-12	0.16884	-9.26e-11	-1.06e-10	-1.22e-10	-1.28e-10	-1.39e-10	-1.47e-10	-1.27e-10	-1.23e-10	-1.62e-10	0.16884	-9.57e-11	-8.8e-11	-7.1e-11	-7.56e-11	-1.06e-10	-1.13e-10	-8.18e-11	-8.8e-11	-1.08e-10	0.16884	-3.24e-10	-3.3e-10	-3.23e-10	-3.06e-10	-3.47e-10	-3.23e-10	-3.35e-10	-3.47e-10	-3.44e-10	0.16884	3.08995e-12	4.63041e-12	-1.68909e-15	2.6233e-11	-1.54216e-12	1.23395e-11	1.69722e-11	-9.25294e-12	1.85177e-11
0.169845	-1.54379e-11	1.54216e-12	-9.00846e-15	-2.16065e-11	-1.5439e-11	-1.54368e-11	-2.16105e-11	-4.63154e-12	4.62591e-12	0.169845	-8.49e-11	-1.11e-10	-1.28e-10	-1.27e-10	-1.31e-10	-1.5e-10	-1.4e-10	-1.31e-10	-1.53e-10	0.169845	-9.72e-11	-1.02e-10	-8.18e-11	-8.02e-11	-1e-10	-1.16e-10	-8.64e-11	-8.8e-11	-8.8e-11	0.169845	-3.13e-10	-3.32e-10	-3.38e-10	-3.18e-10	-3.61e-10	-3.26e-10	-3.4e-10	-3.6e-10	-3.32e-10	0.169845	3.08544e-12	1.08019e-11	-9.25632e-12	2.4692e-11	4.62647e-12	3.9412e-15	1.54362e-11	-4.6321e-12	1.23463e-11
0.17085	-1.85149e-11	-1.54385e-12	-1.38845e-11	-2.77769e-11	-2.7778e-11	-1.08041e-11	-2.31459e-11	-9.25745e-12	-3.08375e-12	0.17085	-9.26e-11	-9.88e-11	-1.28e-10	-1.4e-10	-1.31e-10	-1.45e-10	-1.36e-10	-1.25e-10	-1.5e-10	0.17085	-9.72e-11	-1e-10	-7.87e-11	-8.02e-11	-9.41e-11	-1.13e-10	-9.72e-11	-9.11e-11	-8.33e-11	0.17085	-3.29e-10	-3.12e-10	-3.35e-10	-3.1e-10	-3.73e-10	-3.15e-10	-3.33e-10	-3.5e-10	-3.58e-10	0.17085	0	1.38918e-11	-9.25801e-12	2.16082e-11	1.54722e-12	-1.54497e-12	2.31436e-11	-6.17144e-12	6.1737e-12
0.171855	-9.26533e-12	-6.16863e-12	-1.38918e-11	-2.77757e-11	-3.7032e-11	-9.25745e-12	-1.54311e-11	-7.71867e-12	-3.08826e-12	0.171855	-9.88e-11	-1.02e-10	-1.34e-10	-1.39e-10	-1.25e-10	-1.47e-10	-1.44e-10	-1.34e-10	-1.36e-10	0.171855	-9.72e-11	-1.1e-10	-8.8e-11	-7.56e-11	-9.26e-11	-1.08e-10	-1.02e-10	-9.41e-11	-8.33e-11	0.171855	-3.5e-10	-3.13e-10	-3.43e-10	-3.12e-10	-3.55e-10	-3.19e-10	-3.24e-10	-3.47e-10	-3.47e-10	0.171855	-3.086e-12	2.31464e-11	-4.6321e-12	2.46892e-11	9.2597e-12	-7.71473e-12	1.54368e-11	-3.086e-12	1.54216e-12
0.17286	-1.54227e-11	1.53765e-12	-2.00621e-11	-1.85267e-11	-2.77808e-11	-1.5461e-12	-3.0967e-12	-1.23468e-11	-7.7136e-12	0.17286	-9.72e-11	-1e-10	-1.28e-10	-1.36e-10	-1.2e-10	-1.37e-10	-1.47e-10	-1.25e-10	-1.42e-10	0.17286	-9.11e-11	-1e-10	-8.49e-11	-6.48e-11	-9.26e-11	-1.05e-10	-1.02e-10	-9.11e-11	-8.64e-11	0.17286	-3.4e-10	-3.15e-10	-3.35e-10	-3.33e-10	-3.49e-10	-3.32e-10	-3.3e-10	-3.58e-10	-3.55e-10	0.17286	-4.63041e-12	2.46914e-11	-6.17651e-12	1.85217e-11	1.69772e-11	-9.25632e-12	1.85183e-11	1.54103e-12	-6.17088e-12
0.173865	6.16356e-12	-6.1737e-12	-2.46897e-11	-2.93196e-11	-2.31493e-11	-1.54328e-12	-1.8507e-11	-1.85166e-11	-4.63492e-12	0.173865	-9.72e-11	-9.57e-11	-1.36e-10	-1.4e-10	-1.14e-10	-1.37e-10	-1.57e-10	-1.25e-10	-1.33e-10	0.173865	-7.72e-11	-9.57e-11	-1.02e-10	-7.56e-11	-8.33e-11	-1.06e-10	-1.05e-10	-9.41e-11	-9.26e-11	0.173865	-3.38e-10	-3.12e-10	-3.43e-10	-3.21e-10	-3.46e-10	-3.19e-10	-3.12e-10	-3.53e-10	-3.53e-10	0.173865	-7.71304e-12	2.31509e-11	-1.69716e-11	1.85194e-11	2.77695e-11	-1.54722e-12	1.85188e-11	3.37817e-15	-7.71754e-12
0.17487	1.5461e-12	-1.54289e-11	-2.1611e-11	-3.2405e-11	-1.85222e-11	-1.54385e-12	-5.06726e-15	-1.69823e-11	-1.543e-11	0.17487	-1.05e-10	-9.26e-11	-1.31e-10	-1.45e-10	-1.22e-10	-1.33e-10	-1.62e-10	-1.33e-10	-1.25e-10	0.17487	-6.79e-11	-9.72e-11	-9.88e-11	-8.33e-11	-8.8e-11	-1.08e-10	-1.14e-10	-1.06e-10	-9.26e-11	0.17487	-3.52e-10	-3.02e-10	-3.49e-10	-3.36e-10	-3.36e-10	-3.33e-10	-3.13e-10	-3.49e-10	-3.61e-10	0.17487	-1.54216e-12	2.62319e-11	-1.54233e-11	1.85166e-11	1.23536e-11	-4.62929e-12	1.69761e-11	7.71754e-12	-1.23457e-11
0.175875	4.62872e-12	-1.38918e-11	-3.24016e-11	-2.46908e-11	-2.15998e-11	-3.08544e-12	4.62929e-12	-3.23999e-11	-1.85171e-11	0.175875	-1.05e-10	-9.11e-11	-1.2e-10	-1.4e-10	-1.16e-10	-1.25e-10	-1.64e-10	-1.36e-10	-1.16e-10	0.175875	-7.1e-11	-8.03e-11	-9.88e-11	-7.72e-11	-8.18e-11	-9.72e-11	-1.23e-10	-1.17e-10	-9.88e-11	0.175875	-3.38e-10	-3.12e-10	-3.58e-10	-3.53e-10	-3.21e-10	-3.43e-10	-3.23e-10	-3.61e-10	-3.55e-10	0.175875	7.71642e-12	1.85233e-11	1.23361e-11	1.08052e-11	1.69739e-11	-6.16976e-12	1.54328e-11	1.85143e-11	-1.54323e-11
0.17688	4.63154e-12	-1.85205e-11	-2.3156e-11	-1.23502e-11	-7.71698e-12	-1.54441e-12	7.71135e-12	-2.31538e-11	-1.5439e-11	0.17688	-1.08e-10	-9.41e-11	-1.3e-10	-1.39e-10	-1.14e-10	-1.28e-10	-1.65e-10	-1.36e-10	-1.22e-10	0.17688	-6.64e-11	-8.02e-11	-1.02e-10	-8.95e-11	-9.1e-11	-9.11e-11	-1.13e-10	-1.23e-10	-1e-10	0.17688	-3.35e-10	-3.15e-10	-3.41e-10	-3.64e-10	-3.18e-10	-3.44e-10	-3.12e-10	-3.46e-10	-3.63e-10	0.17688	1.69716e-11	2.16043e-11	1.23446e-11	9.25689e-12	1.5434e-11	1.54328e-12	1.38884e-11	1.54345e-11	-1.69739e-11
0.177885	9.25407e-12	-2.62347e-11	-3.24016e-11	-1.08019e-11	4.6214e-12	-3.08657e-12	-3.08263e-12	-2.62364e-11	-2.9319e-11	0.177885	-1.17e-10	-1.03e-10	-1.14e-10	-1.42e-10	-1.1e-10	-1.22e-10	-1.59e-10	-1.37e-10	-1.23e-10	0.177885	-6.33e-11	-7.72e-11	-1.11e-10	-8.8e-11	-8.49e-11	-9.11e-11	-1.14e-10	-1.13e-10	-1.17e-10	0.177885	-3.35e-10	-3.27e-10	-3.4e-10	-3.72e-10	-2.99e-10	-3.55e-10	-3.27e-10	-3.43e-10	-3.7e-10	0.177885	1.38929e-11	2.00621e-11	7.72261e-12	2.25211e-15	1.6975e-11	9.25801e-12	9.26026e-12	1.69733e-11	-1.23474e-11
0.17889	-1.54159e-12	-3.0864e-11	-2.16093e-11	-6.17144e-12	-6.16413e-12	-4.62929e-12	-3.08769e-12	-3.08668e-11	-3.39539e-11	0.17889	-1.2e-10	-9.41e-11	-1.08e-10	-1.34e-10	-1.25e-10	-1.17e-10	-1.57e-10	-1.59e-10	-1.22e-10	0.17889	-6.02e-11	-8.49e-11	-9.88e-11	-9.88e-11	-8.49e-11	-8.8e-11	-1e-10	-1.27e-10	-1.2e-10	0.17889	-3.27e-10	-3.26e-10	-3.3e-10	-3.78e-10	-3.12e-10	-3.49e-10	-3.53e-10	-3.55e-10	-3.7e-10	0.17889	2.00621e-11	1.69761e-11	2.00559e-11	-3.08544e-12	1.543e-11	1.23463e-11	6.17257e-12	1.08109e-11	-1.0803e-11
0.179895	-7.71079e-12	-3.08645e-11	-2.00616e-11	3.08375e-12	7.71135e-12	-4.6321e-12	-6.17539e-12	-3.85753e-11	-4.32046e-11	0.179895	-1.13e-10	-1.08e-10	-1.02e-10	-1.27e-10	-1.28e-10	-1.33e-10	-1.59e-10	-1.47e-10	-1.14e-10	0.179895	-6.48e-11	-6.95e-11	-9.72e-11	-1e-10	-8.49e-11	-8.33e-11	-9.88e-11	-1.22e-10	-1.13e-10	0.179895	-3.32e-10	-3.33e-10	-3.26e-10	-3.66e-10	-3.04e-10	-3.44e-10	-3.38e-10	-3.44e-10	-3.67e-10	0.179895	2.46886e-11	1.38884e-11	1.38969e-11	-3.08882e-12	6.17651e-12	1.54317e-11	1.54328e-12	2.62285e-11	-9.25801e-12
0.1809	1.53596e-12	-2.77797e-11	-1.54317e-11	4.62816e-12	7.71304e-12	-1.08035e-11	-1.54278e-11	-2.77819e-11	-3.24118e-11	0.1809	-1.02e-10	-1.02e-10	-1.02e-10	-1.17e-10	-1.34e-10	-1.23e-10	-1.5e-10	-1.56e-10	-1.13e-10	0.1809	-7.1e-11	-8.02e-11	-9.57e-11	-1.14e-10	-8.95e-11	-8.8e-11	-9.72e-11	-1.1e-10	-1.2e-10	0.1809	-3.16e-10	-3.32e-10	-3.1e-10	-3.61e-10	-2.99e-10	-3.46e-10	-3.46e-10	-3.33e-10	-3.69e-10	0.1809	1.85222e-11	7.71698e-12	2.77701e-11	-9.2552e-12	6.17201e-12	1.54368e-11	-3.08544e-12	2.16048e-11	-3.08657e-12
0.181905	-9.25857e-12	-2.62358e-11	-7.71473e-12	1.54497e-12	-1.53991e-12	-1.85171e-11	-1.08086e-11	-2.46937e-11	-2.93235e-11	0.181905	-1.06e-10	-1.02e-10	-9.41e-11	-1.17e-10	-1.33e-10	-1.27e-10	-1.4e-10	-1.5e-10	-1.2e-10	0.181905	-6.94e-11	-6.79e-11	-9.1e-11	-1.14e-10	-1e-10	-8.33e-11	-8.64e-11	-1.06e-10	-1.19e-10	0.181905	-3.04e-10	-3.33e-10	-3.07e-10	-3.46e-10	-3.19e-10	-3.5e-10	-3.44e-10	-3.23e-10	-3.56e-10	0.181905	2.00621e-11	3.08657e-12	1.69795e-11	-3.08769e-12	3.086e-12	2.62285e-11	-4.63154e-12	1.38974e-11	3.08544e-12
0.18291	-1.69744e-11	-2.46931e-11	4.62478e-12	3.08713e-12	-1.54272e-12	-2.00644e-11	-2.1602e-11	-2.46886e-11	-2.9319e-11	0.18291	-9.57e-11	-1.14e-10	-9.88e-11	-1.08e-10	-1.34e-10	-1.27e-10	-1.36e-10	-1.62e-10	-1.25e-10	0.18291	-5.71e-11	-6.64e-11	-7.56e-11	-1.08e-10	-9.11e-11	-8.64e-11	-8.49e-11	-1e-10	-1.27e-10	0.18291	-3.06e-10	-3.43e-10	-2.95e-10	-3.3e-10	-3.18e-10	-3.46e-10	-3.64e-10	-3.18e-10	-3.46e-10	0.18291	2.00621e-11	-1.54441e-12	1.54357e-11	-1.68909e-15	-1.54441e-12	1.69812e-11	-1.07979e-11	2.77707e-11	6.17144e-12
0.183915	-2.00638e-11	-2.46892e-11	3.08713e-12	6.16919e-12	-1.68909e-15	-2.62336e-11	-2.1611e-11	-1.38912e-11	-2.00678e-11	0.183915	-9.41e-11	-1.19e-10	-9.72e-11	-1.14e-10	-1.44e-10	-1.36e-10	-1.34e-10	-1.56e-10	-1.33e-10	0.183915	-7.1e-11	-7.72e-11	-7.1e-11	-1.1e-10	-1.02e-10	-8.64e-11	-7.41e-11	-1.02e-10	-1.17e-10	0.183915	-3.04e-10	-3.41e-10	-2.9e-10	-3.36e-10	-3.15e-10	-3.36e-10	-3.73e-10	-3.24e-10	-3.49e-10	0.183915	1.85211e-11	-9.25745e-12	2.1602e-11	-1.54216e-12	-9.25463e-12	2.16032e-11	-3.08938e-12	1.85205e-11	4.63435e-12
0.18492	-2.62324e-11	-1.54334e-11	3.08657e-12	-1.54328e-12	-3.08882e-12	-2.62409e-11	-3.54876e-11	-7.71867e-12	-2.46869e-11	0.18492	-8.49e-11	-1.17e-10	-1.11e-10	-1.14e-10	-1.42e-10	-1.45e-10	-1.2e-10	-1.51e-10	-1.39e-10	0.18492	-8.03e-11	-7.41e-11	-8.02e-11	-9.88e-11	-1.02e-10	-9.41e-11	-8.49e-11	-8.8e-11	-1.06e-10	0.18492	-3.07e-10	-3.56e-10	-2.95e-10	-3.13e-10	-3.27e-10	-3.3e-10	-3.64e-10	-3.16e-10	-3.46e-10	0.18492	2.16009e-11	-1.0803e-11	1.69739e-11	4.50423e-15	-3.09051e-12	1.85205e-11	-3.0815e-12	1.23457e-11	1.54283e-11
0.185925	-2.31509e-11	-7.71867e-12	3.08713e-12	-9.25463e-12	-1.23451e-11	-4.01181e-11	-2.77819e-11	-7.71529e-12	-1.38924e-11	0.185925	-8.64e-11	-1.23e-10	-1.03e-10	-1.13e-10	-1.48e-10	-1.34e-10	-1.23e-10	-1.56e-10	-1.34e-10	0.185925	-8.8e-11	-7.72e-11	-8.02e-11	-9.88e-11	-1.13e-10	-8.95e-11	-8.33e-11	-8.64e-11	-1.13e-10	0.185925	-2.92e-10	-3.53e-10	-2.93e-10	-3.15e-10	-3.23e-10	-3.26e-10	-3.6e-10	-3.36e-10	-3.41e-10	0.185925	1.08109e-11	-1.23429e-11	6.17482e-12	1.38822e-11	-7.71754e-12	1.85166e-11	1.07985e-11	4.62816e-12	1.38884e-11
0.18693	-2.46914e-11	-6.17088e-12	4.62929e-12	-3.09107e-12	-1.85166e-11	-3.39539e-11	-2.77802e-11	-4.62985e-12	-1.0799e-11	0.18693	-8.03e-11	-1.25e-10	-1.16e-10	-1.22e-10	-1.25e-10	-1.51e-10	-1.27e-10	-1.39e-10	-1.42e-10	0.18693	-8.49e-11	-8.03e-11	-7.25e-11	-9.57e-11	-1.19e-10	-1.06e-10	-8.18e-11	-8.95e-11	-8.8e-11	0.18693	-2.96e-10	-3.41e-10	-3.07e-10	-3.12e-10	-3.43e-10	-3.12e-10	-3.61e-10	-3.33e-10	-3.29e-10	0.18693	2.15936e-11	-4.63098e-12	1.68909e-15	7.72261e-12	-1.54244e-11	1.08052e-11	1.23457e-11	-7.70966e-12	9.2642e-12
0.187935	-2.31498e-11	1.54103e-12	4.62872e-12	-9.26139e-12	-1.69795e-11	-3.24056e-11	-3.08645e-11	-1.54497e-12	3.07812e-12	0.187935	-8.64e-11	-1.11e-10	-1.22e-10	-1.19e-10	-1.39e-10	-1.45e-10	-1.23e-10	-1.39e-10	-1.45e-10	0.187935	-9.57e-11	-9.26e-11	-6.48e-11	-8.33e-11	-1.13e-10	-1.17e-10	-7.41e-11	-8.33e-11	-9.88e-11	0.187935	-3.04e-10	-3.35e-10	-3.1e-10	-3.16e-10	-3.43e-10	-3.29e-10	-3.47e-10	-3.24e-10	-3.47e-10	0.187935	-1.53371e-12	1.12606e-15	-1.54272e-12	1.85143e-11	-5.63029e-15	9.2552e-12	1.23496e-11	-1.54385e-12	1.69744e-11
0.18894	-2.31442e-11	3.08713e-12	1.54159e-12	-2.00582e-11	-2.46875e-11	-2.16105e-11	-3.08634e-11	-3.086e-12	-6.17088e-12	0.18894	-8.95e-11	-1.08e-10	-1.25e-10	-1.17e-10	-1.37e-10	-1.53e-10	-1.36e-10	-1.3e-10	-1.45e-10	0.18894	-9.41e-11	-8.8e-11	-6.79e-11	-8.18e-11	-1.02e-10	-1.06e-10	-8.49e-11	-8.8e-11	-8.49e-11	0.18894	-2.99e-10	-3.35e-10	-3.24e-10	-3.16e-10	-3.64e-10	-3.13e-10	-3.44e-10	-3.36e-10	-3.27e-10	0.18894	1.54441e-12	7.71304e-12	-1.54497e-12	1.54345e-11	2.25211e-15	-4.62309e-12	2.16048e-11	3.07756e-12	2.00582e-11
0.189945	-9.26871e-12	6.1675e-12	-6.17088e-12	-1.85211e-11	-1.85239e-11	-2.31447e-11	-2.46965e-11	-3.08657e-12	-9.2552e-12	0.189945	-8.49e-11	-1.08e-10	-1.25e-10	-1.19e-10	-1.22e-10	-1.45e-10	-1.3e-10	-1.33e-10	-1.4e-10	0.189945	-8.95e-11	-1e-10	-8.49e-11	-8.02e-11	-1.03e-10	-1.2e-10	-9.72e-11	-9.26e-11	-9.41e-11	0.189945	-3.21e-10	-3.26e-10	-3.3e-10	-3.27e-10	-3.69e-10	-3.24e-10	-3.38e-10	-3.52e-10	-3.3e-10	0.189945	7.71248e-12	6.17933e-12	-6.17257e-12	1.69784e-11	6.17144e-12	-2.81514e-15	2.77707e-11	-1.69649e-11	1.08052e-11
0.19095	-2.00526e-11	-6.16919e-12	-7.71698e-12	-2.16071e-11	-2.46925e-11	-1.2348e-11	-2.93145e-11	-3.08826e-12	-5.63029e-15	0.19095	-8.95e-11	-1e-10	-1.25e-10	-1.37e-10	-1.16e-10	-1.45e-10	-1.31e-10	-1.25e-10	-1.51e-10	0.19095	-8.95e-11	-1.02e-10	-8.03e-11	-6.64e-11	-1.08e-10	-1.1e-10	-9.41e-11	-9.41e-11	-8.8e-11	0.19095	-3.35e-10	-3.27e-10	-3.24e-10	-3.09e-10	-3.49e-10	-3.23e-10	-3.36e-10	-3.58e-10	-3.38e-10	0.19095	3.08657e-12	2.15986e-11	-9.25745e-12	2.46892e-11	7.71754e-12	-3.08206e-12	1.0812e-11	-6.17989e-12	7.71754e-12
0.191955	-3.09501e-12	-7.71698e-12	-1.08052e-11	-2.77791e-11	-3.08606e-11	-6.1737e-12	-1.23513e-11	-7.71304e-12	-6.17032e-12	0.191955	-9.41e-11	-9.72e-11	-1.3e-10	-1.33e-10	-1.11e-10	-1.39e-10	-1.36e-10	-1.14e-10	-1.4e-10	0.191955	-8.49e-11	-1e-10	-8.03e-11	-6.94e-11	-9.57e-11	-1.05e-10	-1.03e-10	-9.41e-11	-9.72e-11	0.191955	-3.49e-10	-3.12e-10	-3.4e-10	-3.23e-10	-3.5e-10	-3.27e-10	-3.29e-10	-3.67e-10	-3.35e-10	0.191955	-1.54159e-12	1.69789e-11	-6.17651e-12	2.31498e-11	1.23468e-11	6.16694e-12	1.85183e-11	-1.38817e-11	7.71248e-12
0.19296	-9.25294e-12	-1.08007e-11	-2.00582e-11	-3.39477e-11	-2.31538e-11	-1.54497e-12	-9.25914e-12	-3.09051e-12	-4.63492e-12	0.19296	-9.88e-11	-9.57e-11	-1.3e-10	-1.34e-10	-1.19e-10	-1.23e-10	-1.37e-10	-1.28e-10	-1.31e-10	0.19296	-8.33e-11	-1e-10	-8.33e-11	-6.95e-11	-1.02e-10	-1.1e-10	-1.06e-10	-1e-10	-9.26e-11	0.19296	-3.38e-10	-3.1e-10	-3.56e-10	-3.21e-10	-3.46e-10	-3.3e-10	-3.13e-10	-3.7e-10	-3.43e-10	0.19296	-1.54103e-12	2.00638e-11	-1.23423e-11	2.31459e-11	1.85166e-11	-1.54047e-12	2.31442e-11	-3.37817e-15	-3.08206e-12
0.193965	3.08375e-12	-7.71923e-12	-1.69778e-11	-2.77791e-11	-2.77735e-11	-1.54047e-12	-4.62872e-12	-9.2597e-12	-1.69722e-11	0.193965	-1.03e-10	-8.03e-11	-1.23e-10	-1.37e-10	-1.11e-10	-1.22e-10	-1.54e-10	-1.27e-10	-1.33e-10	0.193965	-8.18e-11	-9.57e-11	-9.41e-11	-7.56e-11	-8.18e-11	-1.06e-10	-1.13e-10	-9.88e-11	-1e-10	0.193965	-3.55e-10	-3.13e-10	-3.49e-10	-3.35e-10	-3.38e-10	-3.24e-10	-3.15e-10	-3.69e-10	-3.47e-10	0.193965	4.6276e-12	2.62336e-11	-7.7136e-12	1.38912e-11	1.69756e-11	-1.54328e-12	1.38929e-11	4.62985e-12	-1.54497e-12
0.19497	7.71248e-12	-1.23457e-11	-1.85239e-11	-2.1606e-11	-1.69778e-11	6.16919e-12	3.08544e-12	-1.54368e-11	-1.85211e-11	0.19497	-1e-10	-8.64e-11	-1.27e-10	-1.36e-10	-1e-10	-1.25e-10	-1.59e-10	-1.34e-10	-1.23e-10	0.19497	-7.41e-11	-9.88e-11	-9.11e-11	-7.41e-11	-8.64e-11	-9.57e-11	-1.1e-10	-1e-10	-9.57e-11	0.19497	-3.44e-10	-3.06e-10	-3.41e-10	-3.44e-10	-3.33e-10	-3.24e-10	-3.24e-10	-3.8e-10	-3.52e-10	0.19497	4.63041e-12	2.62336e-11	4.62591e-12	9.26026e-12	1.38918e-11	-1.54272e-12	1.38884e-11	9.2597e-12	-4.62985e-12
0.195975	1.54722e-12	-1.54328e-11	-3.24016e-11	-1.54351e-11	-1.08047e-11	3.08938e-12	7.70966e-12	-3.24022e-11	-2.46886e-11	0.195975	-1.02e-10	-8.95e-11	-1.23e-10	-1.42e-10	-1.1e-10	-1.16e-10	-1.64e-10	-1.22e-10	-1.2e-10	0.195975	-6.79e-11	-9.11e-11	-1e-10	-8.49e-11	-8.49e-11	-9.88e-11	-1.13e-10	-1.06e-10	-9.88e-11	0.195975	-3.5e-10	-3.02e-10	-3.46e-10	-3.49e-10	-3.3e-10	-3.36e-10	-3.26e-10	-3.64e-10	-3.72e-10	0.195975	6.17032e-12	2.00655e-11	6.17482e-12	6.1737e-12	1.69761e-11	1.12606e-15	1.08092e-11	1.38879e-11	-7.7136e-12
0.19698	6.17313e-12	-1.85188e-11	-2.62347e-11	-1.54311e-11	-9.25801e-12	7.71135e-12	-6.16807e-12	-3.0864e-11	-2.00689e-11	0.19698	-1.23e-10	-8.49e-11	-1.16e-10	-1.37e-10	-1.1e-10	-1.2e-10	-1.53e-10	-1.37e-10	-1.22e-10	0.19698	-7.25e-11	-7.41e-11	-1.16e-10	-9.88e-11	-6.95e-11	-9.11e-11	-1.17e-10	-1.23e-10	-1e-10	0.19698	-3.4e-10	-3.1e-10	-3.53e-10	-3.49e-10	-3.24e-10	-3.44e-10	-3.18e-10	-3.58e-10	-3.64e-10	0.19698	6.75634e-15	2.16032e-11	1.23435e-11	4.63041e-12	2.00593e-11	4.62929e-12	2.46818e-11	1.38912e-11	-3.09332e-12
0.197985	1.07974e-11	-2.00644e-11	-1.69817e-11	-1.07996e-11	-3.08713e-12	-1.54159e-12	-6.17144e-12	-2.46999e-11	-3.24045e-11	0.197985	-1.11e-10	-8.8e-11	-1.02e-10	-1.47e-10	-1.1e-10	-1.16e-10	-1.47e-10	-1.34e-10	-1.19e-10	0.197985	-6.64e-11	-6.94e-11	-9.88e-11	-8.95e-11	-8.18e-11	-7.72e-11	-1.08e-10	-1.16e-10	-1.23e-10	0.197985	-3.32e-10	-3.13e-10	-3.33e-10	-3.6e-10	-3.29e-10	-3.44e-10	-3.4e-10	-3.7e-10	-3.7e-10	0.197985	1.2344e-11	1.54368e-11	1.08047e-11	4.6276e-12	1.38907e-11	7.71811e-12	9.26308e-12	1.85177e-11	-1.69671e-11
0.19899	1.68909e-15	-2.6233e-11	-2.31419e-11	3.07981e-12	1.53991e-12	-6.17426e-12	-1.5461e-12	-3.85736e-11	-3.2409e-11	0.19899	-1.06e-10	-8.8e-11	-1.06e-10	-1.25e-10	-1.13e-10	-1.17e-10	-1.57e-10	-1.42e-10	-1.17e-10	0.19899	-5.56e-11	-6.94e-11	-1.06e-10	-9.72e-11	-8.33e-11	-7.25e-11	-1.1e-10	-1.14e-10	-1.17e-10	0.19899	-3.19e-10	-3.21e-10	-3.21e-10	-3.61e-10	-3.27e-10	-3.5e-10	-3.26e-10	-3.58e-10	-3.7e-10	0.19899	1.85194e-11	2.00565e-11	1.38935e-11	-1.54385e-12	1.08013e-11	1.54323e-11	3.08544e-12	1.85217e-11	-6.1782e-12
0.199995	-6.17201e-12	-2.46965e-11	-9.26252e-12	-1.53934e-12	-3.08263e-12	-1.38873e-11	-4.63267e-12	-2.93246e-11	-3.2409e-11	0.199995	-1.08e-10	-9.88e-11	-9.57e-11	-1.14e-10	-1.2e-10	-1.22e-10	-1.44e-10	-1.56e-10	-1.23e-10	0.199995	-6.48e-11	-6.79e-11	-1.06e-10	-9.41e-11	-8.49e-11	-8.8e-11	-9.26e-11	-1.11e-10	-1.16e-10	0.199995	-3.12e-10	-3.24e-10	-3.27e-10	-3.58e-10	-3.16e-10	-3.63e-10	-3.38e-10	-3.35e-10	-3.7e-10	0.199995	2.46892e-11	7.71585e-12	2.77707e-11	-9.25407e-12	3.08713e-12	2.16043e-11	-6.16919e-12	2.46897e-11	-9.25914e-12
0.201	-9.2597e-12	-3.39325e-11	-3.06348e-12	4.6687e-12	3.13499e-12	-1.53675e-11	-1.53484e-11	-2.61362e-11	-3.22958e-11	0.201	-1.06e-10	-1.08e-10	-9.87e-11	-1.2e-10	-1.25e-10	-1.26e-10	-1.39e-10	-1.49e-10	-1.14e-10	0.201	-7.72e-11	-6.33e-11	-9.72e-11	-9.87e-11	-8.48e-11	-8.02e-11	-8.47e-11	-1.11e-10	-1.23e-10	0.201	-3.1e-10	-3.36e-10	-3.24e-10	-3.47e-10	-3.1e-10	-3.55e-10	-3.48e-10	-3.37e-10	-3.67e-10	0.201	2.16093e-11	-6.15174e-12	1.85532e-11	-1.50331e-12	-3.02351e-12	2.32315e-11	-4.53019e-12	2.32759e-11	-1.06329e-11
0.202005	-1.23468e-11	1.07861e-11	6.63325e-11	1.17239e-10	1.41922e-10	1.61965e-10	2.05157e-10	2.49889e-10	2.77655e-10	0.202005	-9.72e-11	-8.03e-11	-2.32e-11	1.38e-11	4.78e-11	1.59e-10	2.84e-10	4.43e-10	7.27e-10	0.202005	-5.56e-11	-4.94e-11	-4.32e-11	-2.94e-11	4.93e-11	1.56e-10	3.32e-10	5.99e-10	1.1e-09	0.202005	-3.07e-10	-2.98e-10	-2.04e-10	-1.3e-10	5.23e-11	2.82e-10	6.34e-10	1.11e-09	1.75e-09	0.202005	2.77735e-11	3.85629e-11	1.01825e-10	1.157e-10	1.63519e-10	2.49916e-10	2.69966e-10	3.68709e-10	4.53559e-10
0.20301	-1.69756e-11	9.26026e-12	5.71015e-11	9.25998e-11	1.17292e-10	1.21926e-10	1.52796e-10	1.88299e-10	2.16075e-10	0.20301	-9.72e-11	-8.33e-11	-3.24e-11	-3.08e-12	3.86e-11	1.34e-10	2.72e-10	4.41e-10	7.33e-10	0.20301	-6.79e-11	-5.71e-11	-4.32e-11	-4.94e-11	1.85e-11	1.77e-10	4.44e-10	9.17e-10	1.68e-09	0.20301	-3.02e-10	-3.41e-10	-2.67e-10	-2.1e-10	4.64e-12	3.24e-10	8.12e-10	1.56e-09	2.52e-09	0.20301	1.85239e-11	3.08629e-11	9.72212e-11	1.04943e-10	1.40439e-10	2.14524e-10	2.48469e-10	3.41074e-10	4.62994e-10
0.204015	-2.00632e-11	9.25857e-12	4.78474e-11	7.56215e-11	1.00315e-10	1.00318e-10	1.31186e-10	1.77482e-10	1.96004e-10	0.204015	-8.95e-11	-8.64e-11	-3.55e-11	-1.54e-12	2.93e-11	1.31e-10	2.76e-10	4.55e-10	7.44e-10	0.204015	-7.56e-11	-6.17e-11	-4.48e-11	-6.48e-11	9.26e-12	1.93e-10	5.57e-10	1.16e-09	2.12e-09	0.204015	-3.15e-10	-3.5e-10	-2.96e-10	-2.25e-10	-1.08e-11	3.58e-10	9.6e-10	1.87e-09	3.06e-09	0.204015	2.16048e-11	1.54379e-11	7.71709e-11	9.2601e-11	1.17296e-10	1.99086e-10	2.28413e-10	3.36436e-10	4.96942e-10
0.20502	-2.4692e-11	6.17651e-12	5.40155e-11	6.01954e-11	8.79705e-11	9.25981e-11	1.28084e-10	1.77472e-10	1.95994e-10	0.20502	-8.33e-11	-9.41e-11	-3.86e-11	-3.09e-12	1.85e-11	1.28e-10	2.86e-10	4.61e-10	7.48e-10	0.20502	-7.41e-11	-6.17e-11	-5.4e-11	-6.48e-11	3.08e-12	2.01e-10	6.31e-10	1.35e-09	2.47e-09	0.20502	-2.99e-10	-3.52e-10	-3.1e-10	-2.41e-10	-2.47e-11	3.92e-10	1.06e-09	2.09e-09	3.44e-09	0.20502	2.1606e-11	1.38912e-11	7.56181e-11	9.10565e-11	1.1266e-10	1.89824e-10	2.26865e-10	3.31813e-10	5.44771e-10
0.206025	-2.77797e-11	1.23457e-11	6.1724e-11	6.48134e-11	8.48767e-11	8.79672e-11	1.01863e-10	1.62046e-10	1.86737e-10	0.206025	-8.8e-11	-9.88e-11	-4.78e-11	-3.09e-12	2.31e-11	1.27e-10	2.78e-10	4.61e-10	7.62e-10	0.206025	-8.03e-11	-6.64e-11	-5.25e-11	-5.4e-11	-1.23e-11	2.19e-10	6.99e-10	1.5e-09	2.75e-09	0.206025	-3.13e-10	-3.53e-10	-3.24e-10	-2.5e-10	-4.48e-11	4.14e-10	1.14e-09	2.27e-09	3.73e-09	0.206025	2.16026e-11	1.69756e-11	6.63606e-11	9.72218e-11	1.0957e-10	1.82106e-10	2.31487e-10	3.47233e-10	5.69477e-10
0.20703	-3.24028e-11	1.69727e-11	4.93879e-11	5.71004e-11	7.09922e-11	8.33379e-11	9.26032e-11	1.49709e-10	1.75938e-10	0.20703	-8.18e-11	-9.41e-11	-5.25e-11	-1.23e-11	1.7e-11	1.1e-10	2.86e-10	4.82e-10	7.72e-10	0.20703	-8.49e-11	-7.41e-11	-4.94e-11	-6.48e-11	-1.08e-11	2.24e-10	7.47e-10	1.61e-09	3.02e-09	0.20703	-3.02e-10	-3.64e-10	-3.24e-10	-2.48e-10	-5.09e-11	4.32e-10	1.19e-09	2.38e-09	3.91e-09	0.20703	1.23485e-11	1.85188e-11	5.55571e-11	8.9511e-11	9.87746e-11	1.69762e-10	2.22244e-10	3.47248e-10	6.09602e-10
0.208035	-2.00683e-11	1.2353e-11	4.47547e-11	4.62985e-11	6.01892e-11	8.0253e-11	1.00311e-10	1.65125e-10	1.74394e-10	0.208035	-8.03e-11	-9.41e-11	-6.33e-11	-1.23e-11	2.78e-11	1.11e-10	2.87e-10	5.11e-10	7.78e-10	0.208035	-9.88e-11	-8.03e-11	-6.17e-11	-6.02e-11	-9.26e-12	2.38e-10	8.01e-10	1.74e-09	3.23e-09	0.208035	-3.07e-10	-3.55e-10	-3.36e-10	-2.56e-10	-5.86e-11	4.48e-10	1.22e-09	2.47e-09	4.07e-09	0.208035	9.25463e-12	1.85239e-11	4.16754e-11	8.33418e-11	1.00314e-10	1.60507e-10	2.43832e-10	3.71927e-10	6.63609e-10
0.20904	-2.31464e-11	2.62291e-11	3.85798e-11	3.55006e-11	5.24739e-11	8.33379e-11	1.00316e-10	1.62044e-10	1.80559e-10	0.20904	-8.18e-11	-8.8e-11	-6.94e-11	-1.23e-11	3.86e-11	1.19e-10	2.93e-10	5.11e-10	7.9e-10	0.20904	-9.57e-11	-8.49e-11	-5.25e-11	-5.71e-11	-1.7e-11	2.52e-10	8.49e-10	1.85e-09	3.44e-09	0.20904	-3.07e-10	-3.55e-10	-3.38e-10	-2.59e-10	-6.64e-11	4.57e-10	1.25e-09	2.52e-09	4.18e-09	0.20904	-7.70459e-12	3.08634e-11	4.62946e-11	8.95088e-11	1.03397e-10	1.66667e-10	2.46927e-10	3.84282e-10	7.08365e-10
0.210045	-1.85205e-11	2.16105e-11	2.62398e-11	3.85793e-11	5.09284e-11	8.7966e-11	1.06482e-10	1.57415e-10	1.72853e-10	0.210045	-8.64e-11	-8.8e-11	-6.33e-11	-2.01e-11	3.55e-11	1.23e-10	2.9e-10	5.2e-10	7.96e-10	0.210045	-9.72e-11	-8.33e-11	-5.86e-11	-5.25e-11	-1.85e-11	2.53e-10	8.83e-10	1.92e-09	3.58e-09	0.210045	-3.13e-10	-3.49e-10	-3.43e-10	-2.67e-10	-6.64e-11	4.52e-10	1.28e-09	2.54e-09	4.25e-09	0.210045	7.70797e-12	3.70343e-11	4.01254e-11	9.10509e-11	9.72336e-11	1.52791e-10	2.54641e-10	4.08965e-10	7.48495e-10
0.21105	-1.69727e-11	2.93128e-11	2.46931e-11	3.39517e-11	4.93851e-11	8.95093e-11	1.00315e-10	1.52783e-10	1.80558e-10	0.21105	-8.64e-11	-7.25e-11	-7.56e-11	-3.39e-11	3.4e-11	1.28e-10	2.87e-10	5.23e-10	8.1e-10	0.21105	-9.57e-11	-8.64e-11	-6.02e-11	-4.94e-11	1.54e-12	2.56e-10	8.95e-10	2.01e-09	3.72e-09	0.21105	-3.21e-10	-3.38e-10	-3.63e-10	-2.7e-10	-8.02e-11	4.61e-10	1.3e-09	2.6e-09	4.31e-09	0.21105	0	3.08702e-11	3.39528e-11	8.48829e-11	1.09572e-10	1.55864e-10	2.60816e-10	4.19777e-10	7.96334e-10
0.212055	-6.17539e-12	1.08097e-11	2.46892e-11	2.77774e-11	4.78407e-11	8.79711e-11	9.87735e-11	1.41983e-10	1.71306e-10	0.212055	-8.49e-11	-7.1e-11	-7.1e-11	-3.86e-11	3.86e-11	1.27e-10	2.87e-10	5.37e-10	8.35e-10	0.212055	-9.26e-11	-9.41e-11	-6.64e-11	-5.25e-11	1.55e-12	2.62e-10	9.21e-10	2.08e-09	3.86e-09	0.212055	-3.4e-10	-3.32e-10	-3.64e-10	-2.67e-10	-8.33e-11	4.55e-10	1.32e-09	2.62e-09	4.34e-09	0.212055	-7.7136e-12	3.70382e-11	2.93235e-11	8.4875e-11	1.18829e-10	1.38906e-10	2.70074e-10	4.41379e-10	8.44173e-10
0.21306	-1.54554e-12	1.08035e-11	1.54357e-11	1.69846e-11	4.32159e-11	9.72235e-11	1.0649e-10	1.32726e-10	1.6513e-10	0.21306	-8.8e-11	-7.25e-11	-8.18e-11	-4.63e-11	4.94e-11	1.31e-10	2.96e-10	5.32e-10	8.46e-10	0.21306	-8.03e-11	-8.95e-11	-7.25e-11	-4.32e-11	1.08e-11	2.64e-10	9.37e-10	2.13e-09	3.97e-09	0.21306	-3.38e-10	-3.38e-10	-3.64e-10	-2.73e-10	-7.72e-11	4.6e-10	1.32e-09	2.64e-09	4.36e-09	0.21306	-7.71698e-12	4.16658e-11	2.77797e-11	6.94573e-11	1.17288e-10	1.49693e-10	2.77788e-10	4.62988e-10	8.82758e-10
0.214065	-3.08375e-12	1.23446e-11	1.38867e-11	2.93162e-11	4.93845e-11	9.7228e-11	1.23453e-10	1.32721e-10	1.54333e-10	0.214065	-1.08e-10	-6.79e-11	-7.72e-11	-4.48e-11	4.48e-11	1.45e-10	2.81e-10	5.36e-10	8.57e-10	0.214065	-8.49e-11	-7.87e-11	-8.03e-11	-5.25e-11	1.54e-11	2.7e-10	9.6e-10	2.2e-09	4.06e-09	0.214065	-3.55e-10	-3.35e-10	-3.69e-10	-2.75e-10	-6.79e-11	4.51e-10	1.32e-09	2.63e-09	4.36e-09	0.214065	-9.25238e-12	3.85849e-11	2.77814e-11	8.02434e-11	1.1266e-10	1.45069e-10	2.77793e-10	4.92302e-10	9.21341e-10
0.21507	3.08431e-12	9.25857e-12	4.63604e-12	2.4697e-11	5.40132e-11	1.00312e-10	1.14208e-10	1.28095e-10	1.57413e-10	0.21507	-9.57e-11	-6.17e-11	-7.25e-11	-3.86e-11	4.94e-11	1.36e-10	2.87e-10	5.39e-10	8.63e-10	0.21507	-5.87e-11	-8.18e-11	-8.64e-11	-5.71e-11	1.08e-11	2.69e-10	9.77e-10	2.23e-09	4.15e-09	0.21507	-3.47e-10	-3.27e-10	-3.66e-10	-2.82e-10	-6.64e-11	4.51e-10	1.34e-09	2.65e-09	4.38e-09	0.21507	9.24957e-12	4.3208e-11	3.39517e-11	7.09927e-11	1.09575e-10	1.41986e-10	2.82426e-10	5.06202e-10	9.63008e-10
0.216075	3.086e-12	3.08826e-12	1.23435e-11	3.24101e-11	5.40183e-11	9.87701e-11	1.1883e-10	1.29632e-10	1.55867e-10	0.216075	-1.14e-10	-6.94e-11	-6.33e-11	-4.01e-11	4.94e-11	1.45e-10	2.87e-10	5.45e-10	8.77e-10	0.216075	-7.41e-11	-7.87e-11	-9.88e-11	-5.71e-11	1.23e-11	2.84e-10	9.86e-10	2.3e-09	4.23e-09	0.216075	-3.5e-10	-3.23e-10	-3.64e-10	-2.95e-10	-5.25e-11	4.48e-10	1.35e-09	2.66e-09	4.39e-09	0.216075	9.57149e-15	3.70433e-11	3.85832e-11	6.63595e-11	1.11111e-10	1.49699e-10	3.00932e-10	5.33974e-10	1.00314e-09
0.21708	1.54385e-12	1.53991e-12	1.23496e-11	4.32052e-11	6.32735e-11	9.72235e-11	1.15744e-10	1.20375e-10	1.41991e-10	0.21708	-1.17e-10	-7.41e-11	-6.64e-11	-4.17e-11	5.25e-11	1.51e-10	2.84e-10	5.45e-10	8.75e-10	0.21708	-6.17e-11	-6.48e-11	-1e-10	-6.48e-11	1.54e-11	2.95e-10	1.01e-09	2.32e-09	4.31e-09	0.21708	-3.41e-10	-3.27e-10	-3.67e-10	-2.96e-10	-4.78e-11	4.51e-10	1.36e-09	2.65e-09	4.38e-09	0.21708	1.69682e-11	4.32063e-11	4.62946e-11	5.71026e-11	9.87786e-11	1.58954e-10	2.97853e-10	5.57129e-10	1.05097e-09
0.218085	1.54103e-12	-9.2552e-12	2.1602e-11	3.55028e-11	6.94461e-11	8.64289e-11	1.06492e-10	1.08038e-10	1.52774e-10	0.218085	-1.16e-10	-6.79e-11	-5.56e-11	-4.17e-11	4.94e-11	1.5e-10	2.89e-10	5.34e-10	8.94e-10	0.218085	-6.17e-11	-6.64e-11	-8.64e-11	-7.87e-11	1.54e-11	2.99e-10	1.03e-09	2.35e-09	4.34e-09	0.218085	-3.24e-10	-3.27e-10	-3.58e-10	-2.99e-10	-5.56e-11	4.34e-10	1.35e-09	2.67e-09	4.4e-09	0.218085	1.23508e-11	3.39522e-11	4.3217e-11	5.09261e-11	1.09564e-10	1.55876e-10	2.91686e-10	5.91077e-10	1.09264e-09
0.21909	-4.62478e-12	-7.71811e-12	2.00644e-11	4.78395e-11	7.09922e-11	8.95059e-11	1.11112e-10	1.17284e-10	1.32732e-10	0.21909	-1.14e-10	-7.25e-11	-5.56e-11	-4.01e-11	3.55e-11	1.5e-10	2.87e-10	5.39e-10	9.03e-10	0.21909	-6.02e-11	-6.33e-11	-8.95e-11	-7.41e-11	9.26e-12	3.02e-10	1.03e-09	2.38e-09	4.39e-09	0.21909	-3.41e-10	-3.35e-10	-3.6e-10	-2.99e-10	-4.94e-11	4.41e-10	1.35e-09	2.68e-09	4.4e-09	0.21909	2.00576e-11	2.46959e-11	5.4007e-11	3.85872e-11	9.56875e-11	1.6359e-10	3.00937e-10	6.23484e-10	1.13432e-09
0.220095	3.08319e-12	-1.08035e-11	2.31487e-11	5.40099e-11	7.56203e-11	8.02519e-11	1.03404e-10	1.12661e-10	1.3889e-10	0.220095	-1.14e-10	-7.56e-11	-5.09e-11	-3.09e-11	2.62e-11	1.47e-10	2.89e-10	5.36e-10	9.01e-10	0.220095	-6.64e-11	-6.33e-11	-9.26e-11	-8.03e-11	1.7e-11	3.12e-10	1.05e-09	2.42e-09	4.44e-09	0.220095	-3.29e-10	-3.52e-10	-3.49e-10	-2.99e-10	-4.01e-11	4.32e-10	1.35e-09	2.68e-09	4.41e-09	0.220095	1.38963e-11	2.46925e-11	4.32198e-11	4.01259e-11	9.26004e-11	1.77471e-10	3.00943e-10	6.48172e-10	1.1837e-09
0.2211	1.54216e-12	-1.543e-11	2.46959e-11	4.63053e-11	7.87075e-11	7.4077e-11	1.06483e-10	1.11121e-10	1.29643e-10	0.2211	-1.06e-10	-8.64e-11	-5.09e-11	-1.54e-11	2.31e-11	1.54e-10	3.07e-10	5.39e-10	9.07e-10	0.2211	-6.33e-11	-5.71e-11	-7.56e-11	-8.64e-11	6.17e-12	3.13e-10	1.07e-09	2.45e-09	4.5e-09	0.2211	-3.1e-10	-3.52e-10	-3.36e-10	-2.95e-10	-4.17e-11	4.32e-10	1.34e-09	2.69e-09	4.41e-09	0.2211	2.62308e-11	2.46886e-11	5.40104e-11	4.32136e-11	9.87639e-11	1.74394e-10	3.08654e-10	6.54363e-10	1.22537e-09
0.222105	-3.09332e-12	-1.23429e-11	3.54916e-11	5.7097e-11	8.17884e-11	6.63657e-11	9.87696e-11	1.21915e-10	1.40434e-10	0.222105	-9.72e-11	-1.02e-10	-4.01e-11	-1.39e-11	1.85e-11	1.37e-10	3.09e-10	5.43e-10	9.07e-10	0.222105	-6.79e-11	-6.33e-11	-7.72e-11	-8.18e-11	-5.63e-16	3.02e-10	1.07e-09	2.47e-09	4.53e-09	0.222105	-3.1e-10	-3.69e-10	-3.36e-10	-2.9e-10	-4.63e-11	4.32e-10	1.33e-09	2.69e-09	4.41e-09	0.222105	2.46925e-11	1.38918e-11	5.24733e-11	5.09233e-11	8.79683e-11	1.80564e-10	3.10204e-10	6.91386e-10	1.27784e-09
0.22311	-2.62262e-11	-1.12606e-15	3.54961e-11	5.55593e-11	6.94528e-11	7.09871e-11	8.95121e-11	1.21922e-10	1.37357e-10	0.22311	-9.57e-11	-1.02e-10	-4.94e-11	-2.93e-11	2.16e-11	1.33e-10	3.16e-10	5.51e-10	9.17e-10	0.22311	-7.56e-11	-6.48e-11	-6.79e-11	-8.33e-11	-7.71e-12	3.06e-10	1.08e-09	2.49e-09	4.57e-09	0.22311	-3.09e-10	-3.72e-10	-3.41e-10	-2.9e-10	-4.48e-11	4.46e-10	1.33e-09	2.69e-09	4.4e-09	0.22311	2.31464e-11	9.26195e-12	5.55543e-11	4.47614e-11	8.0253e-11	1.85193e-10	3.22547e-10	7.14535e-10	1.32569e-09
0.224115	-2.31493e-11	9.25632e-12	3.70405e-11	5.70992e-11	7.09882e-11	6.48179e-11	8.4884e-11	1.28091e-10	1.48154e-10	0.224115	-8.95e-11	-1.03e-10	-5.56e-11	-1.85e-11	1.85e-11	1.33e-10	3.18e-10	5.52e-10	9.07e-10	0.224115	-7.56e-11	-6.17e-11	-6.48e-11	-9.11e-11	-7.72e-12	3.06e-10	1.1e-09	2.5e-09	4.63e-09	0.224115	-2.95e-10	-3.73e-10	-3.35e-10	-2.72e-10	-4.78e-11	4.44e-10	1.32e-09	2.7e-09	4.41e-09	0.224115	1.38969e-11	1.0803e-11	4.78435e-11	5.5552e-11	7.87069e-11	1.86735e-10	3.37975e-10	7.23806e-10	1.39357e-09
0.22512	-2.00649e-11	9.26026e-12	4.3208e-11	5.24722e-11	6.48179e-11	5.86487e-11	8.95048e-11	1.29635e-10	1.54329e-10	0.22512	-8.33e-11	-1.03e-10	-5.09e-11	-1.7e-11	1.39e-11	1.3e-10	3.24e-10	5.63e-10	9e-10	0.22512	-7.87e-11	-7.41e-11	-5.71e-11	-9.41e-11	-1.39e-11	3.04e-10	1.11e-09	2.54e-09	4.67e-09	0.22512	-2.96e-10	-3.66e-10	-3.4e-10	-2.62e-10	-4.17e-11	4.54e-10	1.34e-09	2.69e-09	4.41e-09	0.22512	2.46841e-11	1.23435e-11	4.47558e-11	4.93907e-11	7.56231e-11	1.82111e-10	3.42609e-10	7.48487e-10	1.42909e-09
0.226125	-2.31493e-11	1.08058e-11	3.85821e-11	4.93868e-11	5.86487e-11	6.32735e-11	7.87148e-11	1.2964e-10	1.63586e-10	0.226125	-8.33e-11	-1.06e-10	-5.09e-11	-1.39e-11	1.7e-11	1.3e-10	3.26e-10	5.62e-10	9.01e-10	0.226125	-8.64e-11	-7.1e-11	-5.86e-11	-8.49e-11	-1.7e-11	3.09e-10	1.11e-09	2.56e-09	4.7e-09	0.226125	-2.96e-10	-3.66e-10	-3.49e-10	-2.61e-10	-6.02e-11	4.63e-10	1.33e-09	2.69e-09	4.43e-09	0.226125	1.23491e-11	6.17708e-12	4.32086e-11	5.86448e-11	7.87058e-11	1.86734e-10	3.47239e-10	7.59297e-10	1.48001e-09
0.22713	-2.62347e-11	2.00593e-11	3.39556e-11	5.0925e-11	6.32701e-11	6.48157e-11	8.79559e-11	1.40434e-10	1.66675e-10	0.22713	-7.72e-11	-9.57e-11	-6.48e-11	-1.85e-11	1.54e-11	1.31e-10	3.23e-10	5.69e-10	9.09e-10	0.22713	-8.03e-11	-7.25e-11	-5.86e-11	-6.95e-11	-1.39e-11	2.95e-10	1.12e-09	2.57e-09	4.72e-09	0.22713	-2.96e-10	-3.53e-10	-3.41e-10	-2.61e-10	-5.56e-11	4.6e-10	1.33e-09	2.71e-09	4.45e-09	0.22713	7.71811e-12	1.0803e-11	3.24101e-11	6.79005e-11	7.71676e-11	1.82107e-10	3.51871e-10	7.7473e-10	1.54173e-09
0.228135	-2.62336e-11	2.00644e-11	3.85765e-11	4.32119e-11	5.55588e-11	6.01909e-11	6.63753e-11	1.38897e-10	1.71303e-10	0.228135	-8.33e-11	-1.05e-10	-6.33e-11	-2.01e-11	2.31e-11	1.33e-10	3.29e-10	5.76e-10	9.06e-10	0.228135	-8.95e-11	-8.64e-11	-6.02e-11	-7.1e-11	-2.16e-11	2.98e-10	1.12e-09	2.6e-09	4.75e-09	0.228135	-3.01e-10	-3.52e-10	-3.38e-10	-2.55e-10	-6.48e-11	4.6e-10	1.34e-09	2.72e-09	4.46e-09	0.228135	7.7136e-12	1.5434e-11	2.46959e-11	6.63606e-11	8.48772e-11	1.77477e-10	3.64217e-10	7.94792e-10	1.58033e-09
0.22914	-2.00666e-11	2.4688e-11	2.7783e-11	3.54983e-11	4.93873e-11	6.32814e-11	8.33334e-11	1.40436e-10	1.71306e-10	0.22914	-8.18e-11	-1.02e-10	-7.41e-11	-2.62e-11	2.32e-11	1.28e-10	3.27e-10	5.9e-10	9.11e-10	0.22914	-9.57e-11	-8.64e-11	-6.79e-11	-6.17e-11	-1.85e-11	2.89e-10	1.12e-09	2.59e-09	4.78e-09	0.22914	-3.09e-10	-3.46e-10	-3.47e-10	-2.67e-10	-7.25e-11	4.71e-10	1.35e-09	2.7e-09	4.46e-09	0.22914	5.06726e-15	2.31487e-11	2.62347e-11	6.32729e-11	8.33401e-11	1.71307e-10	3.8119e-10	8.17936e-10	1.62971e-09
0.230145	-2.46869e-11	1.69795e-11	2.77763e-11	3.54966e-11	4.93817e-11	8.48722e-11	8.95082e-11	1.34272e-10	1.75933e-10	0.230145	-8.33e-11	-8.95e-11	-7.1e-11	-2.47e-11	4.01e-11	1.22e-10	3.26e-10	5.83e-10	9.12e-10	0.230145	-9.57e-11	-9.11e-11	-5.87e-11	-5.56e-11	-1.23e-11	2.84e-10	1.13e-09	2.63e-09	4.82e-09	0.230145	-3.12e-10	-3.44e-10	-3.55e-10	-2.61e-10	-8.18e-11	4.71e-10	1.34e-09	2.69e-09	4.46e-09	0.230145	6.16807e-12	2.93201e-11	2.46908e-11	5.55661e-11	8.95127e-11	1.72847e-10	3.96621e-10	8.30287e-10	1.67754e-09
0.23115	-1.38935e-11	1.85177e-11	2.00638e-11	3.85781e-11	4.01316e-11	8.33384e-11	8.95138e-11	1.45061e-10	1.75935e-10	0.23115	-8.8e-11	-8.33e-11	-8.49e-11	-3.86e-11	4.32e-11	1.34e-10	3.23e-10	5.91e-10	9.11e-10	0.23115	-9.11e-11	-9.57e-11	-6.94e-11	-6.17e-11	-1.55e-12	2.79e-10	1.13e-09	2.63e-09	4.85e-09	0.23115	-3.38e-10	-3.18e-10	-3.72e-10	-2.65e-10	-8.49e-11	4.77e-10	1.35e-09	2.7e-09	4.46e-09	0.23115	-1.54385e-12	2.9323e-11	1.85245e-11	6.94416e-11	1.01851e-10	1.72847e-10	4.04343e-10	8.44176e-10	1.7115e-09
0.232155	-1.38856e-11	1.54317e-11	1.54368e-11	3.08645e-11	4.78407e-11	8.48806e-11	9.87696e-11	1.34268e-10	1.79014e-10	0.232155	-8.95e-11	-8.18e-11	-8.18e-11	-4.63e-11	3.7e-11	1.4e-10	3.16e-10	5.94e-10	9.32e-10	0.232155	-9.26e-11	-9.88e-11	-7.56e-11	-6.17e-11	1.54e-12	2.86e-10	1.11e-09	2.62e-09	4.85e-09	0.232155	-3.35e-10	-3.29e-10	-3.57e-10	-2.65e-10	-7.72e-11	4.61e-10	1.35e-09	2.68e-09	4.45e-09	0.232155	-1.07968e-11	3.08674e-11	2.62308e-11	6.63612e-11	9.7228e-11	1.71302e-10	4.18226e-10	8.56526e-10	1.75008e-09
0.23316	-3.086e-12	9.26139e-12	2.15992e-11	2.00689e-11	5.2466e-11	8.64239e-11	1.06485e-10	1.2964e-10	1.62052e-10	0.23316	-9.57e-11	-7.1e-11	-7.41e-11	-5.25e-11	4.48e-11	1.45e-10	3.15e-10	5.99e-10	9.38e-10	0.23316	-7.87e-11	-9.26e-11	-8.03e-11	-5.86e-11	3.09e-12	2.9e-10	1.11e-09	2.61e-09	4.9e-09	0.23316	-3.36e-10	-3.32e-10	-3.66e-10	-2.72e-10	-6.48e-11	4.6e-10	1.36e-09	2.67e-09	4.47e-09	0.23316	-3.08769e-12	3.70349e-11	2.00678e-11	6.32763e-11	9.5687e-11	1.63594e-10	4.21319e-10	8.7813e-10	1.77324e-09
0.234165	9.25463e-12	7.71585e-12	9.26589e-12	2.62375e-11	4.16737e-11	8.79672e-11	1.09571e-10	1.35799e-10	1.65129e-10	0.234165	-9.57e-11	-8.02e-11	-7.56e-11	-5.71e-11	4.78e-11	1.5e-10	3.04e-10	6.1e-10	9.37e-10	0.234165	-8.02e-11	-8.33e-11	-8.33e-11	-5.4e-11	4.63e-12	2.9e-10	1.12e-09	2.63e-09	4.9e-09	0.234165	-3.52e-10	-3.16e-10	-3.6e-10	-2.9e-10	-6.17e-11	4.6e-10	1.36e-09	2.69e-09	4.47e-09	0.234165	1.54328e-12	3.2414e-11	2.7778e-11	6.48128e-11	1.03397e-10	1.71301e-10	4.30574e-10	9.04357e-10	1.82878e-09
0.23517	7.71585e-12	4.63154e-12	1.3885e-11	3.70332e-11	4.47609e-11	8.95121e-11	1.0803e-10	1.14213e-10	1.62044e-10	0.23517	-9.72e-11	-7.41e-11	-8.33e-11	-5.86e-11	4.32e-11	1.6e-10	3.01e-10	6.08e-10	9.38e-10	0.23517	-7.56e-11	-8.18e-11	-8.33e-11	-6.48e-11	1.54e-11	3.04e-10	1.12e-09	2.65e-09	4.91e-09	0.23517	-3.44e-10	-3.21e-10	-3.77e-10	-2.84e-10	-5.56e-11	4.61e-10	1.35e-09	2.66e-09	4.46e-09	0.23517	6.17201e-12	4.1663e-11	3.24061e-11	5.24745e-11	1.03397e-10	1.69762e-10	4.35209e-10	9.12092e-10	1.85657e-09
0.236175	4.6321e-12	6.1675e-12	6.17651e-12	3.24129e-11	6.32673e-11	9.56802e-11	1.06491e-10	1.2037e-10	1.55872e-10	0.236175	-1.16e-10	-7.56e-11	-7.1e-11	-4.78e-11	4.17e-11	1.48e-10	3.04e-10	5.99e-10	9.61e-10	0.236175	-7.25e-11	-7.72e-11	-8.64e-11	-5.71e-11	1.7e-11	3.12e-10	1.13e-09	2.66e-09	4.92e-09	0.236175	-3.41e-10	-3.24e-10	-3.72e-10	-2.93e-10	-4.32e-11	4.48e-10	1.37e-09	2.66e-09	4.46e-09	0.236175	7.7136e-12	3.54938e-11	2.93275e-11	4.78401e-11	9.56881e-11	1.71312e-10	4.47549e-10	9.50655e-10	1.88127e-09
0.23718	7.71417e-12	-7.71417e-12	7.71642e-12	3.85827e-11	6.1733e-11	9.25948e-11	1.15742e-10	1.09576e-10	1.497e-10	0.23718	-1.14e-10	-7.41e-11	-7.72e-11	-4.78e-11	4.01e-11	1.6e-10	3.02e-10	5.97e-10	9.48e-10	0.23718	-6.48e-11	-7.56e-11	-1e-10	-6.33e-11	1.39e-11	3.18e-10	1.13e-09	2.66e-09	4.93e-09	0.23718	-3.32e-10	-3.24e-10	-3.67e-10	-2.99e-10	-5.25e-11	4.43e-10	1.37e-09	2.69e-09	4.47e-09	0.23718	1.55173e-12	2.46965e-11	4.01226e-11	3.85877e-11	1.0031e-10	1.94442e-10	4.5064e-10	9.67642e-10	1.92293e-09
0.238185	4.62929e-12	-1.54278e-11	9.26364e-12	4.62968e-11	6.4819e-11	8.33435e-11	1.12663e-10	1.06486e-10	1.48155e-10	0.238185	-1.14e-10	-8.18e-11	-6.95e-11	-3.7e-11	3.55e-11	1.54e-10	3.09e-10	5.97e-10	9.6e-10	0.238185	-6.33e-11	-6.48e-11	-1e-10	-7.1e-11	1.54e-11	3.18e-10	1.14e-09	2.67e-09	4.95e-09	0.238185	-3.32e-10	-3.3e-10	-3.46e-10	-3.13e-10	-5.25e-11	4.48e-10	1.36e-09	2.68e-09	4.44e-09	0.238185	1.85166e-11	2.46942e-11	4.32102e-11	4.47479e-11	9.5687e-11	1.85201e-10	4.5681e-10	9.93875e-10	1.94917e-09
0.23919	3.37817e-15	-9.26026e-12	2.16043e-11	4.93839e-11	7.0991e-11	9.1047e-11	1.17284e-10	1.01861e-10	1.46609e-10	0.23919	-1.03e-10	-8.03e-11	-6.79e-11	-4.17e-11	3.4e-11	1.48e-10	3.24e-10	5.91e-10	9.78e-10	0.23919	-6.17e-11	-6.33e-11	-8.49e-11	-7.1e-11	1.08e-11	3.19e-10	1.13e-09	2.69e-09	4.98e-09	0.23919	-3.27e-10	-3.33e-10	-3.36e-10	-2.98e-10	-4.94e-11	4.32e-10	1.35e-09	2.67e-09	4.44e-09	0.23919	2.77729e-11	2.93168e-11	4.1672e-11	3.08719e-11	1.00305e-10	1.95995e-10	4.58355e-10	1.02165e-09	1.99238e-09
0.240195	4.62591e-12	-4.63435e-12	2.93213e-11	4.93856e-11	7.71625e-11	8.02547e-11	1.0649e-10	1.09571e-10	1.37357e-10	0.240195	-1.16e-10	-8.8e-11	-6.02e-11	-2.93e-11	3.24e-11	1.6e-10	3.18e-10	5.88e-10	9.85e-10	0.240195	-6.33e-11	-6.64e-11	-8.8e-11	-8.03e-11	4.63e-12	3.36e-10	1.15e-09	2.68e-09	4.98e-09	0.240195	-3.12e-10	-3.4e-10	-3.47e-10	-2.9e-10	-3.09e-11	4.31e-10	1.35e-09	2.7e-09	4.43e-09	0.240195	2.00683e-11	1.85211e-11	4.93839e-11	3.39545e-11	8.18019e-11	2.00626e-10	4.599e-10	1.02629e-09	2.0433e-09
0.2412	-1.54328e-12	-1.23423e-11	3.39511e-11	5.09317e-11	7.87069e-11	8.02462e-11	1.04939e-10	1.11118e-10	1.40442e-10	0.2412	-1.05e-10	-8.95e-11	-5.56e-11	-3.24e-11	2.32e-11	1.53e-10	3.24e-10	5.85e-10	9.78e-10	0.2412	-6.17e-11	-5.71e-11	-7.41e-11	-8.8e-11	6.17e-12	3.16e-10	1.15e-09	2.7e-09	4.97e-09	0.2412	-2.96e-10	-3.43e-10	-3.35e-10	-2.95e-10	-4.01e-11	4.44e-10	1.35e-09	2.7e-09	4.46e-09	0.2412	2.77746e-11	1.23496e-11	5.40132e-11	4.32086e-11	8.48817e-11	2.03716e-10	4.66068e-10	1.04172e-09	2.08343e-09
0.242205	-7.71754e-12	-9.2597e-12	3.54938e-11	6.17251e-11	7.87052e-11	6.79101e-11	9.10582e-11	1.17289e-10	1.51237e-10	0.242205	-1.08e-10	-1e-10	-4.94e-11	-3.24e-11	2.32e-11	1.51e-10	3.36e-10	5.74e-10	9.91e-10	0.242205	-6.48e-11	-6.33e-11	-6.94e-11	-8.95e-11	6.17e-12	3.23e-10	1.15e-09	2.72e-09	4.99e-09	0.242205	-3.13e-10	-3.56e-10	-3.24e-10	-3.04e-10	-4.48e-11	4.41e-10	1.34e-09	2.7e-09	4.46e-09	0.242205	2.31498e-11	1.543e-11	5.40104e-11	4.32108e-11	9.10425e-11	2.12967e-10	4.62988e-10	1.0664e-09	2.12048e-09
0.24321	-1.69739e-11	-6.17088e-12	3.24135e-11	5.55582e-11	7.25343e-11	7.09888e-11	8.95099e-11	1.21921e-10	1.497e-10	0.24321	-9.57e-11	-1.05e-10	-6.17e-11	-2.47e-11	2.62e-11	1.5e-10	3.33e-10	6e-10	9.82e-10	0.24321	-6.48e-11	-6.17e-11	-6.02e-11	-8.33e-11	3.08e-12	3.23e-10	1.17e-09	2.71e-09	5.03e-09	0.24321	-3.02e-10	-3.69e-10	-3.3e-10	-2.82e-10	-4.48e-11	4.38e-10	1.34e-09	2.7e-09	4.45e-09	0.24321	2.00672e-11	1.08002e-11	4.16748e-11	4.01282e-11	6.6368e-11	2.06803e-10	4.69156e-10	1.07876e-09	2.16831e-09
0.244215	-2.00616e-11	3.08431e-12	4.1663e-11	4.93879e-11	6.6364e-11	6.79011e-11	8.64261e-11	1.31178e-10	1.51249e-10	0.244215	-8.49e-11	-1.03e-10	-6.48e-11	-2.01e-11	1.24e-11	1.44e-10	3.35e-10	5.9e-10	9.83e-10	0.244215	-7.72e-11	-6.48e-11	-6.64e-11	-7.72e-11	-1.08e-11	3.15e-10	1.17e-09	2.71e-09	5.03e-09	0.244215	-2.95e-10	-3.53e-10	-3.3e-10	-2.82e-10	-4.32e-11	4.37e-10	1.32e-09	2.69e-09	4.42e-09	0.244215	2.93162e-11	-1.53653e-12	4.62923e-11	4.47569e-11	6.01926e-11	2.08345e-10	4.69162e-10	1.0911e-09	2.20072e-09
0.24522	-2.00666e-11	6.17482e-12	3.54983e-11	5.09272e-11	6.79017e-11	5.55633e-11	8.95054e-11	1.37352e-10	1.71298e-10	0.24522	-7.72e-11	-1.1e-10	-6.64e-11	-2.93e-11	2.01e-11	1.33e-10	3.49e-10	6.07e-10	9.89e-10	0.24522	-8.8e-11	-6.79e-11	-6.48e-11	-7.1e-11	-9.26e-12	3.18e-10	1.17e-09	2.73e-09	5.05e-09	0.24522	-2.93e-10	-3.69e-10	-3.36e-10	-2.79e-10	-4.94e-11	4.37e-10	1.33e-09	2.7e-09	4.43e-09	0.24522	2.16099e-11	4.63041e-12	3.39562e-11	5.4011e-11	6.63573e-11	2.14512e-10	4.79963e-10	1.09882e-09	2.23622e-09
0.246225	-3.08589e-11	1.38879e-11	3.70405e-11	4.93862e-11	6.17319e-11	5.71015e-11	7.87108e-11	1.4198e-10	1.74385e-10	0.246225	-8.03e-11	-9.72e-11	-6.64e-11	-2.01e-11	2.01e-11	1.28e-10	3.43e-10	6.07e-10	9.89e-10	0.246225	-8.18e-11	-7.1e-11	-6.48e-11	-7.56e-11	-1.08e-11	3.15e-10	1.17e-09	2.72e-09	5.06e-09	0.246225	-3.02e-10	-3.63e-10	-3.3e-10	-2.73e-10	-6.02e-11	4.52e-10	1.33e-09	2.7e-09	4.44e-09	0.246225	2.46835e-11	1.23446e-11	3.24056e-11	5.24705e-11	6.17364e-11	2.08344e-10	4.95392e-10	1.11888e-09	2.27479e-09
0.24723	-2.31532e-11	1.69727e-11	4.32074e-11	5.09216e-11	5.71043e-11	5.86487e-11	7.71653e-11	1.40442e-10	1.62055e-10	0.24723	-8.49e-11	-1.08e-10	-6.33e-11	-3.55e-11	1.24e-11	1.28e-10	3.43e-10	6.16e-10	9.77e-10	0.24723	-9.41e-11	-8.64e-11	-6.33e-11	-7.72e-11	-1.7e-11	3.07e-10	1.2e-09	2.76e-09	5.07e-09	0.24723	-3.02e-10	-3.64e-10	-3.36e-10	-2.65e-10	-6.64e-11	4.58e-10	1.34e-09	2.7e-09	4.45e-09	0.24723	3.09726e-12	1.54317e-11	2.16133e-11	4.78457e-11	7.09882e-11	2.05256e-10	5.04654e-10	1.12814e-09	2.2995e-09
0.248235	-2.62308e-11	1.08092e-11	3.70411e-11	3.39629e-11	6.0183e-11	7.09877e-11	7.87091e-11	1.48153e-10	1.77471e-10	0.248235	-7.56e-11	-1e-10	-8.02e-11	-2.47e-11	1.7e-11	1.25e-10	3.44e-10	6.08e-10	9.77e-10	0.248235	-1e-10	-8.8e-11	-5.09e-11	-6.94e-11	-2.78e-11	3.15e-10	1.19e-09	2.75e-09	5.1e-09	0.248235	-3.1e-10	-3.49e-10	-3.33e-10	-2.69e-10	-6.94e-11	4.6e-10	1.33e-09	2.71e-09	4.48e-09	0.248235	1.07968e-11	1.54311e-11	3.08617e-11	5.40161e-11	7.25366e-11	2.00628e-10	5.15456e-10	1.1374e-09	2.33345e-09
0.24924	-1.54396e-11	2.16026e-11	3.70377e-11	4.62884e-11	4.93868e-11	7.4072e-11	8.48772e-11	1.49697e-10	1.74394e-10	0.24924	-9.31e-11	-9.04e-11	-7.25e-11	-5.1e-11	3.07e-11	1.47e-10	3.42e-10	6.16e-10	9.8e-10	0.24924	-9.41e-11	-9.41e-11	-6.48e-11	-6.02e-11	-1.54e-11	3.09e-10	1.19e-09	2.79e-09	5.11e-09	0.24924	-3.19e-10	-3.47e-10	-3.41e-10	-2.59e-10	-7.1e-11	4.69e-10	1.35e-09	2.7e-09	4.5e-09	0.24924	1.54891e-12	1.08092e-11	2.93184e-11	6.32701e-11	8.02468e-11	1.99086e-10	5.23174e-10	1.159e-09	2.37511e-09
0.250245	-2.31408e-11	2.31453e-11	3.39517e-11	3.08685e-11	4.32136e-11	6.17426e-11	8.17974e-11	1.48152e-10	1.79018e-10	0.250245	-9.68e-11	-8.74e-11	-7.85e-11	-4e-11	2.8e-11	1.42e-10	3.37e-10	6.18e-10	9.73e-10	0.250245	-9.57e-11	-9.41e-11	-5.56e-11	-5.71e-11	-1.08e-11	2.99e-10	1.19e-09	2.77e-09	5.11e-09	0.250245	-3.29e-10	-3.4e-10	-3.49e-10	-2.73e-10	-8.33e-11	4.6e-10	1.34e-09	2.69e-09	4.5e-09	0.250245	7.70741e-12	2.31459e-11	1.69806e-11	6.01858e-11	7.71692e-11	2.03711e-10	5.33973e-10	1.16519e-09	2.40444e-09
0.25125	-7.72599e-12	1.38941e-11	2.93207e-11	2.31509e-11	4.16709e-11	8.02479e-11	8.79683e-11	1.38898e-10	1.74394e-10	0.25125	-9.61e-11	-8.77e-11	-7.91e-11	-3.68e-11	2.24e-11	1.44e-10	3.26e-10	6.31e-10	9.85e-10	0.25125	-9.41e-11	-9.88e-11	-6.64e-11	-5.71e-11	-7.71e-12	2.96e-10	1.19e-09	2.79e-09	5.14e-09	0.25125	-3.4e-10	-3.13e-10	-3.63e-10	-2.69e-10	-8.8e-11	4.68e-10	1.35e-09	2.7e-09	4.52e-09	0.25125	-1.07962e-11	2.62364e-11	1.69756e-11	5.09334e-11	8.79649e-11	2.00627e-10	5.37065e-10	1.18987e-09	2.43376e-09
0.252255	-1.85115e-11	1.69739e-11	2.00649e-11	2.00632e-11	4.62979e-11	9.10487e-11	9.72235e-11	1.37351e-10	1.79018e-10	0.252255	-8.56e-11	-9.52e-11	-7.2e-11	-2.96e-11	3.87e-11	1.51e-10	3.44e-10	6.2e-10	9.99e-10	0.252255	-8.49e-11	-9.41e-11	-8.18e-11	-4.94e-11	-3.94e-15	2.98e-10	1.18e-09	2.76e-09	5.14e-09	0.252255	-3.47e-10	-3.29e-10	-3.67e-10	-2.76e-10	-6.95e-11	4.61e-10	1.36e-09	2.72e-09	4.5e-09	0.252255	-1.08013e-11	3.08668e-11	1.54351e-11	5.55537e-11	9.2597e-11	1.99084e-10	5.46321e-10	1.20685e-09	2.46771e-09
0.25326	-7.71585e-12	1.38879e-11	1.69756e-11	1.85211e-11	4.93834e-11	8.79722e-11	9.72291e-11	1.32723e-10	1.75932e-10	0.25326	-9.61e-11	-9.26e-11	-6.97e-11	-3.89e-11	3.99e-11	1.48e-10	3.37e-10	6.25e-10	9.91e-10	0.25326	-8.64e-11	-9.41e-11	-7.87e-11	-5.56e-11	-3.08e-12	2.99e-10	1.18e-09	2.77e-09	5.13e-09	0.25326	-3.38e-10	-3.32e-10	-3.84e-10	-2.73e-10	-6.94e-11	4.61e-10	1.35e-09	2.69e-09	4.52e-09	0.25326	-6.1737e-12	3.85832e-11	2.0061e-11	4.78446e-11	9.72224e-11	1.99081e-10	5.50952e-10	1.22691e-09	2.49086e-09
0.254265	4.62309e-12	6.1782e-12	1.2348e-11	2.16077e-11	4.78424e-11	9.87645e-11	1.034e-10	1.29634e-10	1.66679e-10	0.254265	-8.66e-11	-9.06e-11	-7.82e-11	-3.72e-11	4.04e-11	1.45e-10	3.43e-10	6.28e-10	9.97e-10	0.254265	-8.02e-11	-9.11e-11	-8.03e-11	-5.56e-11	7.72e-12	3.07e-10	1.18e-09	2.79e-09	5.13e-09	0.254265	-3.47e-10	-3.38e-10	-3.66e-10	-2.73e-10	-6.33e-11	4.66e-10	1.36e-09	2.7e-09	4.5e-09	0.254265	-3.08544e-12	4.93761e-11	2.00655e-11	4.78395e-11	8.95161e-11	1.92917e-10	5.55585e-10	1.25314e-09	2.52481e-09
0.25527	-1.53822e-12	1.23406e-11	1.23463e-11	2.93224e-11	4.78457e-11	9.41386e-11	1.09571e-10	1.20381e-10	1.69758e-10	0.25527	-8.84e-11	-8.9e-11	-6.82e-11	-3.73e-11	3.71e-11	1.48e-10	3.41e-10	6.37e-10	9.93e-10	0.25527	-6.64e-11	-8.49e-11	-8.33e-11	-6.64e-11	1.7e-11	3.15e-10	1.17e-09	2.79e-09	5.17e-09	0.25527	-3.47e-10	-3.3e-10	-3.67e-10	-2.92e-10	-6.48e-11	4.51e-10	1.38e-09	2.69e-09	4.5e-09	0.25527	3.08431e-12	3.54989e-11	2.77763e-11	4.16698e-11	9.72201e-11	2.03709e-10	5.67928e-10	1.2655e-09	2.55414e-09
0.256275	6.17088e-12	3.08431e-12	1.23451e-11	3.70371e-11	5.86397e-11	8.48879e-11	1.11115e-10	1.25002e-10	1.63588e-10	0.256275	-9.84e-11	-9.65e-11	-6.91e-11	-3.47e-11	3.48e-11	1.42e-10	3.3e-10	6.34e-10	9.98e-10	0.256275	-7.1e-11	-7.41e-11	-9.57e-11	-6.17e-11	2.01e-11	3.29e-10	1.18e-09	2.77e-09	5.18e-09	0.256275	-3.55e-10	-3.36e-10	-3.61e-10	-2.96e-10	-6.33e-11	4.6e-10	1.36e-09	2.69e-09	4.5e-09	0.256275	3.09276e-12	3.08668e-11	2.77814e-11	3.85832e-11	8.64329e-11	2.03717e-10	5.8027e-10	1.29636e-09	2.58654e-09
0.25728	7.71473e-12	-1.23384e-11	9.2597e-12	4.01259e-11	5.55638e-11	9.56757e-11	1.09574e-10	1.18829e-10	1.57419e-10	0.25728	-9.27e-11	-9.47e-11	-6.63e-11	-3.87e-11	3.19e-11	1.46e-10	3.42e-10	6.34e-10	9.95e-10	0.25728	-6.48e-11	-6.64e-11	-9.88e-11	-6.48e-11	1.39e-11	3.32e-10	1.18e-09	2.77e-09	5.2e-09	0.25728	-3.46e-10	-3.32e-10	-3.61e-10	-2.98e-10	-4.94e-11	4.55e-10	1.38e-09	2.69e-09	4.47e-09	0.25728	2.00554e-11	2.9323e-11	3.39505e-11	3.85765e-11	1.00304e-10	2.14516e-10	5.80272e-10	1.32413e-09	2.61125e-09
0.258285	4.62929e-12	-6.17482e-12	6.17933e-12	4.47563e-11	6.79005e-11	8.48817e-11	1.09575e-10	1.03408e-10	1.63584e-10	0.258285	-9.36e-11	-9.32e-11	-6.86e-11	-4.26e-11	3.72e-11	1.44e-10	3.35e-10	6.28e-10	1e-09	0.258285	-6.94e-11	-6.33e-11	-8.95e-11	-7.1e-11	3.09e-12	3.38e-10	1.18e-09	2.74e-09	5.19e-09	0.258285	-3.35e-10	-3.41e-10	-3.46e-10	-2.99e-10	-3.7e-11	4.43e-10	1.37e-09	2.68e-09	4.46e-09	0.258285	1.69784e-11	2.93201e-11	3.54966e-11	2.31571e-11	8.79722e-11	2.23771e-10	5.74106e-10	1.33649e-09	2.66678e-09
0.25929	1.12606e-15	-4.63323e-12	2.00576e-11	5.24683e-11	6.94478e-11	7.71709e-11	1.15742e-10	1.09572e-10	1.57416e-10	0.25929	-8.44e-11	-8.8e-11	-7.23e-11	-4.15e-11	3.37e-11	1.49e-10	3.31e-10	6.22e-10	1e-09	0.25929	-6.33e-11	-5.4e-11	-8.49e-11	-9.41e-11	1.08e-11	3.41e-10	1.18e-09	2.75e-09	5.19e-09	0.25929	-3.3e-10	-3.43e-10	-3.49e-10	-2.95e-10	-4.63e-11	4.41e-10	1.37e-09	2.67e-09	4.46e-09	0.25929	2.00644e-11	2.31504e-11	4.01265e-11	2.9319e-11	8.95082e-11	2.19151e-10	5.80275e-10	1.36117e-09	2.67761e-09
0.260295	-1.54272e-12	-1.23451e-11	2.00649e-11	5.09295e-11	7.09922e-11	8.7957e-11	1.09574e-10	1.12658e-10	1.54328e-10	0.260295	-9.67e-11	-8.7e-11	-7.51e-11	-3.81e-11	3.51e-11	1.53e-10	3.42e-10	6.32e-10	1.01e-09	0.260295	-6.33e-11	-5.71e-11	-8.64e-11	-7.56e-11	1.08e-11	3.32e-10	1.19e-09	2.75e-09	5.2e-09	0.260295	-3.24e-10	-3.44e-10	-3.38e-10	-2.95e-10	-4.32e-11	4.41e-10	1.35e-09	2.68e-09	4.45e-09	0.260295	2.77752e-11	2.0061e-11	4.78384e-11	2.62364e-11	8.48772e-11	2.28403e-10	5.86445e-10	1.37352e-09	2.71772e-09
0.2613	-1.54666e-12	-1.69727e-11	2.62375e-11	5.24739e-11	7.56203e-11	7.09978e-11	1.06485e-10	1.11124e-10	1.49704e-10	0.2613	-8.73e-11	-8.42e-11	-7.53e-11	-3.52e-11	3.63e-11	1.49e-10	3.47e-10	6.23e-10	1e-09	0.2613	-6.79e-11	-6.02e-11	-8.49e-11	-9.41e-11	3.09e-12	3.3e-10	1.2e-09	2.76e-09	5.19e-09	0.2613	-3.1e-10	-3.49e-10	-3.18e-10	-2.93e-10	-5.09e-11	4.44e-10	1.36e-09	2.69e-09	4.45e-09	0.2613	2.46948e-11	1.2348e-11	4.62946e-11	2.46959e-11	7.09967e-11	2.28408e-10	5.86444e-10	1.38895e-09	2.74859e-09
0.262305	-1.08019e-11	-1.23468e-11	3.70309e-11	6.01858e-11	7.87058e-11	7.25354e-11	9.87701e-11	1.2963e-10	1.58957e-10	0.262305	-8.6e-11	-9.09e-11	-8.03e-11	-4.1e-11	2.65e-11	1.43e-10	3.49e-10	6.18e-10	1.01e-09	0.262305	-6.02e-11	-5.4e-11	-7.56e-11	-9.11e-11	-1.55e-12	3.3e-10	1.2e-09	2.79e-09	5.18e-09	0.262305	-3.06e-10	-3.63e-10	-3.35e-10	-2.81e-10	-4.63e-11	4.41e-10	1.35e-09	2.71e-09	4.48e-09	0.262305	2.7774e-11	9.25914e-12	3.39601e-11	3.24056e-11	7.25332e-11	2.33033e-10	5.77194e-10	1.40131e-09	2.78254e-09
0.26331	-1.69761e-11	-9.25632e-12	2.62437e-11	6.17319e-11	7.71597e-11	7.71557e-11	9.1056e-11	1.32721e-10	1.63591e-10	0.26331	-8.81e-11	-9.29e-11	-7.75e-11	-4.41e-11	2.23e-11	1.53e-10	3.42e-10	6.09e-10	1.01e-09	0.26331	-6.02e-11	-5.86e-11	-7.1e-11	-9.26e-11	-1.23e-11	3.27e-10	1.22e-09	2.81e-09	5.21e-09	0.26331	-2.95e-10	-3.53e-10	-3.3e-10	-2.82e-10	-4.63e-11	4.51e-10	1.34e-09	2.71e-09	4.47e-09	0.26331	1.69789e-11	4.63041e-12	4.32063e-11	3.08685e-11	7.09905e-11	2.29955e-10	5.83361e-10	1.42444e-09	2.80415e-09
0.264315	-2.31476e-11	3.08488e-12	3.70332e-11	6.48095e-11	6.32802e-11	5.86504e-11	8.95088e-11	1.31181e-10	1.75931e-10	0.264315	-8.11e-11	-9.21e-11	-8.38e-11	-4.56e-11	3.11e-11	1.45e-10	3.42e-10	6.2e-10	1.02e-09	0.264315	-6.02e-11	-6.33e-11	-7.1e-11	-8.95e-11	-1.23e-11	3.36e-10	1.21e-09	2.83e-09	5.2e-09	0.264315	-2.92e-10	-3.58e-10	-3.18e-10	-2.64e-10	-4.01e-11	4.51e-10	1.33e-09	2.72e-09	4.45e-09	0.264315	1.38924e-11	1.54835e-12	3.70405e-11	3.70371e-11	6.79045e-11	2.43833e-10	5.89534e-10	1.43062e-09	2.84735e-09
0.26532	-2.46931e-11	1.08002e-11	3.24112e-11	4.47642e-11	6.48179e-11	5.5561e-11	8.3339e-11	1.35811e-10	1.7902e-10	0.26532	-8.9e-11	-9.93e-11	-7.2e-11	-4.24e-11	2.51e-11	1.59e-10	3.35e-10	6.28e-10	1.01e-09	0.26532	-7.87e-11	-6.64e-11	-6.17e-11	-8.03e-11	-1.39e-11	3.32e-10	1.22e-09	2.84e-09	5.21e-09	0.26532	-2.92e-10	-3.78e-10	-3.18e-10	-2.67e-10	-5.09e-11	4.58e-10	1.36e-09	2.72e-09	4.47e-09	0.26532	1.85155e-11	1.23401e-11	3.54921e-11	3.85843e-11	6.48179e-11	2.42294e-10	5.94168e-10	1.4368e-09	2.87205e-09
0.266325	-2.77763e-11	1.08041e-11	3.39528e-11	4.93806e-11	6.63578e-11	6.01864e-11	8.17951e-11	1.46606e-10	1.79023e-10	0.266325	-9.39e-11	-9.29e-11	-7.76e-11	-4.49e-11	2.29e-11	1.47e-10	3.44e-10	6.25e-10	1.02e-09	0.266325	-8.33e-11	-8.02e-11	-6.94e-11	-8.02e-11	-1.85e-11	3.29e-10	1.21e-09	2.87e-09	5.22e-09	0.266325	-3.02e-10	-3.64e-10	-3.23e-10	-2.67e-10	-6.02e-11	4.52e-10	1.33e-09	2.72e-09	4.45e-09	0.266325	1.23485e-11	6.17539e-12	2.46976e-11	4.62929e-11	6.17342e-11	2.36125e-10	6.08048e-10	1.46457e-09	2.89829e-09
0.26733	-2.31526e-11	1.38901e-11	3.70382e-11	4.16681e-11	5.86453e-11	6.0192e-11	8.33373e-11	1.41985e-10	1.83649e-10	0.26733	-9.13e-11	-9.42e-11	-8.08e-11	-4.56e-11	1.68e-11	1.42e-10	3.42e-10	6.25e-10	1.02e-09	0.26733	-9.41e-11	-8.8e-11	-6.64e-11	-7.72e-11	-1.54e-11	3.18e-10	1.22e-09	2.86e-09	5.24e-09	0.26733	-3.02e-10	-3.58e-10	-3.32e-10	-2.62e-10	-5.86e-11	4.6e-10	1.35e-09	2.72e-09	4.48e-09	0.26733	1.23446e-11	6.17708e-12	2.77774e-11	3.85877e-11	6.63623e-11	2.3612e-10	6.04978e-10	1.47384e-09	2.92298e-09
0.268335	-2.77769e-11	1.85183e-11	3.8581e-11	3.24123e-11	5.2475e-11	7.09905e-11	8.48817e-11	1.46611e-10	1.83651e-10	0.268335	-9.62e-11	-8.89e-11	-8.18e-11	-4.47e-11	3e-11	1.54e-10	3.41e-10	6.34e-10	1.01e-09	0.268335	-9.57e-11	-8.33e-11	-6.48e-11	-6.79e-11	-1.23e-11	3.23e-10	1.22e-09	2.88e-09	5.27e-09	0.268335	-2.99e-10	-3.5e-10	-3.27e-10	-2.64e-10	-6.79e-11	4.61e-10	1.36e-09	2.73e-09	4.46e-09	0.268335	7.71304e-12	1.69727e-11	2.62336e-11	4.62974e-11	7.40725e-11	2.29954e-10	6.31195e-10	1.48156e-09	2.96311e-09
0.26934	-2.62308e-11	2.00632e-11	3.70343e-11	3.24095e-11	5.55531e-11	8.02485e-11	8.95099e-11	1.48152e-10	1.85196e-10	0.26934	-8.45e-11	-9.86e-11	-8.44e-11	-4.57e-11	3.01e-11	1.49e-10	3.5e-10	6.36e-10	1.03e-09	0.26934	-9.11e-11	-8.49e-11	-6.17e-11	-6.33e-11	-1.7e-11	3.18e-10	1.22e-09	2.88e-09	5.27e-09	0.26934	-3.1e-10	-3.55e-10	-3.36e-10	-2.62e-10	-6.79e-11	4.66e-10	1.36e-09	2.72e-09	4.5e-09	0.26934	-6.16469e-12	1.85188e-11	1.85183e-11	5.09284e-11	6.79062e-11	2.3766e-10	6.34291e-10	1.49852e-09	3.01094e-09
0.270345	-1.08064e-11	2.31447e-11	2.31554e-11	3.395e-11	4.47614e-11	8.33334e-11	9.25965e-11	1.41985e-10	1.92906e-10	0.270345	-9.59e-11	-8.82e-11	-7.56e-11	-4.44e-11	2.84e-11	1.44e-10	3.48e-10	6.4e-10	1.03e-09	0.270345	-1.03e-10	-8.95e-11	-6.48e-11	-5.56e-11	-1.7e-11	3.15e-10	1.2e-09	2.88e-09	5.29e-09	0.270345	-3.16e-10	-3.47e-10	-3.55e-10	-2.55e-10	-8.18e-11	4.72e-10	1.36e-09	2.71e-09	4.49e-09	0.270345	3.08206e-12	1.85228e-11	7.72261e-12	5.5556e-11	6.63668e-11	2.29951e-10	6.42004e-10	1.50625e-09	3.04644e-09
0.27135	-4.63379e-12	1.38957e-11	2.62296e-11	2.93241e-11	5.09216e-11	7.56288e-11	9.41442e-11	1.45068e-10	1.89824e-10	0.27135	-9.35e-11	-9.45e-11	-7.73e-11	-4.76e-11	3.46e-11	1.51e-10	3.49e-10	6.41e-10	1.03e-09	0.27135	-8.95e-11	-8.18e-11	-7.25e-11	-4.78e-11	-3.09e-12	3.04e-10	1.2e-09	2.9e-09	5.31e-09	0.27135	-3.13e-10	-3.35e-10	-3.56e-10	-2.58e-10	-7.56e-11	4.68e-10	1.37e-09	2.71e-09	4.48e-09	0.27135	-5.63029e-16	2.77718e-11	1.38867e-11	5.40144e-11	8.02474e-11	2.26861e-10	6.45094e-10	1.52168e-09	3.07268e-09
0.272355	-9.25407e-12	2.15986e-11	1.23496e-11	2.9323e-11	3.85917e-11	8.95009e-11	1.06483e-10	1.45068e-10	1.86737e-10	0.272355	-8.59e-11	-8.39e-11	-7.86e-11	-3.75e-11	3.18e-11	1.56e-10	3.47e-10	6.43e-10	1.02e-09	0.272355	-8.95e-11	-8.33e-11	-6.48e-11	-5.25e-11	-9.25e-12	3.18e-10	1.21e-09	2.89e-09	5.31e-09	0.272355	-3.27e-10	-3.38e-10	-3.57e-10	-2.65e-10	-7.56e-11	4.72e-10	1.38e-09	2.72e-09	4.49e-09	0.272355	-4.62872e-12	1.6984e-11	1.23457e-11	5.09306e-11	8.48817e-11	2.19151e-10	6.51265e-10	1.55099e-09	3.09891e-09
0.27336	1.53991e-12	9.26364e-12	7.72148e-12	3.08651e-11	5.2466e-11	7.71749e-11	1.09572e-10	1.4198e-10	1.8211e-10	0.27336	-9.33e-11	-9.57e-11	-7.54e-11	-4.25e-11	3.89e-11	1.55e-10	3.48e-10	6.51e-10	1.03e-09	0.27336	-8.49e-11	-9.41e-11	-8.18e-11	-5.86e-11	1.54e-11	3.26e-10	1.21e-09	2.88e-09	5.32e-09	0.27336	-3.27e-10	-3.21e-10	-3.64e-10	-2.69e-10	-7.1e-11	4.68e-10	1.37e-09	2.71e-09	4.5e-09	0.27336	-6.17144e-12	2.77785e-11	9.26308e-12	5.40104e-11	9.25919e-11	2.23773e-10	6.55897e-10	1.55563e-09	3.12206e-09
0.274365	3.08206e-12	7.71698e-12	1.69682e-11	3.08657e-11	5.09295e-11	9.41347e-11	1.09573e-10	1.34266e-10	1.83646e-10	0.274365	-9.3e-11	-9.68e-11	-7.69e-11	-4.57e-11	3.46e-11	1.56e-10	3.51e-10	6.45e-10	1.04e-09	0.274365	-8.33e-11	-9.57e-11	-8.03e-11	-5.25e-11	1.23e-11	3.23e-10	1.2e-09	2.87e-09	5.33e-09	0.274365	-3.49e-10	-3.36e-10	-3.69e-10	-2.84e-10	-6.48e-11	4.63e-10	1.38e-09	2.72e-09	4.5e-09	0.274365	-3.08544e-12	3.70343e-11	1.54345e-11	4.47558e-11	8.64284e-11	2.2069e-10	6.65156e-10	1.56952e-09	3.13441e-09
0.27537	-7.70403e-12	7.71585e-12	4.63604e-12	3.08662e-11	5.24722e-11	9.56836e-11	1.08031e-10	1.26551e-10	1.72852e-10	0.27537	-8.86e-11	-1.03e-10	-7.2e-11	-4.43e-11	3.27e-11	1.52e-10	3.44e-10	6.48e-10	1.02e-09	0.27537	-7.25e-11	-8.18e-11	-9.57e-11	-6.48e-11	1.54e-11	3.15e-10	1.19e-09	2.88e-09	5.34e-09	0.27537	-3.53e-10	-3.23e-10	-3.67e-10	-2.86e-10	-5.56e-11	4.6e-10	1.37e-09	2.72e-09	4.49e-09	0.27537	3.08657e-12	3.39545e-11	2.62296e-11	3.70411e-11	9.25942e-11	2.19152e-10	6.7595e-10	1.5865e-09	3.16065e-09
0.276375	1.54188e-11	6.16919e-12	9.25745e-12	3.24095e-11	5.55576e-11	9.72207e-11	1.09573e-10	1.25005e-10	1.72848e-10	0.276375	-9.93e-11	-9.46e-11	-7.3e-11	-3.57e-11	3.51e-11	1.47e-10	3.44e-10	6.56e-10	1.03e-09	0.276375	-6.48e-11	-6.64e-11	-8.95e-11	-6.64e-11	1.39e-11	3.24e-10	1.2e-09	2.89e-09	5.34e-09	0.276375	-3.43e-10	-3.35e-10	-3.8e-10	-2.84e-10	-5.4e-11	4.61e-10	1.38e-09	2.7e-09	4.5e-09	0.276375	9.26083e-12	3.7036e-11	2.00683e-11	3.54938e-11	9.10543e-11	2.34575e-10	6.65161e-10	1.60964e-09	3.19151e-09
0.27738	5.63029e-15	-6.16638e-12	7.71923e-12	3.54983e-11	5.71037e-11	8.18013e-11	1.11115e-10	1.20373e-10	1.74389e-10	0.27738	-9.2e-11	-9.02e-11	-7.18e-11	-4.44e-11	2.91e-11	1.55e-10	3.45e-10	6.65e-10	1.04e-09	0.27738	-6.33e-11	-6.79e-11	-8.8e-11	-6.48e-11	1.39e-11	3.29e-10	1.21e-09	2.9e-09	5.35e-09	0.27738	-3.36e-10	-3.27e-10	-3.63e-10	-2.98e-10	-5.4e-11	4.52e-10	1.39e-09	2.69e-09	4.49e-09	0.27738	1.85138e-11	3.24078e-11	2.93196e-11	2.93252e-11	9.10498e-11	2.3767e-10	6.71324e-10	1.61891e-09	3.22391e-09
0.278385	0	-5.63029e-15	1.38901e-11	4.62974e-11	6.48185e-11	8.64222e-11	1.08029e-10	1.06496e-10	1.69758e-10	0.278385	-1.02e-10	-9.84e-11	-7.67e-11	-3.61e-11	2.87e-11	1.51e-10	3.45e-10	6.5e-10	1.04e-09	0.278385	-6.33e-11	-6.64e-11	-8.8e-11	-8.02e-11	2.01e-11	3.43e-10	1.21e-09	2.87e-09	5.34e-09	0.278385	-3.29e-10	-3.38e-10	-3.53e-10	-2.99e-10	-4.63e-11	4.48e-10	1.37e-09	2.69e-09	4.47e-09	0.278385	1.23491e-11	2.4692e-11	3.08685e-11	3.08645e-11	8.02564e-11	2.51548e-10	6.66703e-10	1.64051e-09	3.22239e-09
0.27939	2.25211e-15	-9.25689e-12	2.16037e-11	5.40104e-11	7.40725e-11	8.64222e-11	1.01861e-10	1.1729e-10	1.57423e-10	0.27939	-9e-11	-9.46e-11	-7.37e-11	-3.99e-11	3.02e-11	1.46e-10	3.48e-10	6.43e-10	1.04e-09	0.27939	-6.17e-11	-6.33e-11	-8.95e-11	-7.72e-11	1.08e-11	3.36e-10	1.21e-09	2.87e-09	5.33e-09	0.27939	-3.15e-10	-3.32e-10	-3.46e-10	-3.07e-10	-4.78e-11	4.52e-10	1.39e-09	2.68e-09	4.46e-09	0.27939	1.38907e-11	1.54373e-11	4.01231e-11	2.93218e-11	8.48767e-11	2.45385e-10	6.74415e-10	1.65286e-09	3.26559e-09
0.280395	6.16413e-12	-1.08019e-11	2.31493e-11	4.93862e-11	6.94483e-11	8.17935e-11	1.08024e-10	1.29626e-10	1.66669e-10	0.280395	-8.7e-11	-8.74e-11	-7.76e-11	-4.25e-11	3.04e-11	1.61e-10	3.47e-10	6.46e-10	1.04e-09	0.280395	-5.56e-11	-6.17e-11	-8.8e-11	-7.56e-11	1.08e-11	3.35e-10	1.22e-09	2.85e-09	5.31e-09	0.280395	-3.09e-10	-3.4e-10	-3.4e-10	-3.07e-10	-4.17e-11	4.44e-10	1.37e-09	2.71e-09	4.47e-09	0.280395	1.852e-11	1.8516e-11	4.32086e-11	2.62347e-11	7.8708e-11	2.48471e-10	6.83672e-10	1.66984e-09	3.3057e-09
0.2814	-1.23401e-11	-9.25576e-12	2.46937e-11	4.78457e-11	6.6368e-11	7.56186e-11	9.87758e-11	1.15756e-10	1.60502e-10	0.2814	-8.84e-11	-8.78e-11	-7.57e-11	-4.37e-11	3.05e-11	1.54e-10	3.56e-10	6.46e-10	1.04e-09	0.2814	-6.48e-11	-5.71e-11	-7.56e-11	-8.49e-11	4.5e-15	3.4e-10	1.24e-09	2.86e-09	5.32e-09	0.2814	-3.02e-10	-3.49e-10	-3.38e-10	-2.9e-10	-4.48e-11	4.32e-10	1.36e-09	2.7e-09	4.47e-09	0.2814	2.46886e-11	1.23468e-11	3.70416e-11	2.00644e-11	7.40754e-11	2.59268e-10	6.86757e-10	1.69606e-09	3.3196e-09
0.282405	-1.38924e-11	3.07868e-12	2.93241e-11	5.70975e-11	8.17861e-11	6.32797e-11	1.04934e-10	1.29629e-10	1.55881e-10	0.282405	-8.89e-11	-9.14e-11	-8.46e-11	-4.13e-11	2.26e-11	1.54e-10	3.55e-10	6.52e-10	1.04e-09	0.282405	-6.94e-11	-5.86e-11	-7.56e-11	-9.41e-11	1.54e-12	3.36e-10	1.23e-09	2.87e-09	5.32e-09	0.282405	-3.04e-10	-3.56e-10	-3.38e-10	-2.89e-10	-4.48e-11	4.51e-10	1.35e-09	2.71e-09	4.46e-09	0.282405	2.00655e-11	7.71811e-12	3.85804e-11	1.85228e-11	6.32786e-11	2.60814e-10	6.77513e-10	1.70687e-09	3.33658e-09
0.28341	-2.31419e-11	-6.16581e-12	3.85804e-11	5.55571e-11	7.56198e-11	6.48173e-11	8.64312e-11	1.23469e-10	1.77469e-10	0.28341	-9.41e-11	-8.65e-11	-8.71e-11	-4.7e-11	3.1e-11	1.54e-10	3.5e-10	6.5e-10	1.04e-09	0.28341	-7.56e-11	-6.17e-11	-6.94e-11	-9.26e-11	-9.26e-12	3.4e-10	1.24e-09	2.88e-09	5.33e-09	0.28341	-3.02e-10	-3.58e-10	-3.29e-10	-2.81e-10	-4.17e-11	4.48e-10	1.36e-09	2.69e-09	4.46e-09	0.28341	2.31481e-11	7.71698e-12	3.54966e-11	2.62347e-11	6.32701e-11	2.59274e-10	6.99098e-10	1.71767e-09	3.36282e-09
0.284415	-1.23513e-11	4.6276e-12	4.3208e-11	5.09312e-11	6.63646e-11	6.48134e-11	8.79649e-11	1.34266e-10	1.74394e-10	0.284415	-9.29e-11	-9.6e-11	-8.06e-11	-4.2e-11	2.9e-11	1.58e-10	3.59e-10	6.43e-10	1.05e-09	0.284415	-8.02e-11	-7.1e-11	-6.33e-11	-8.49e-11	-9.26e-12	3.29e-10	1.25e-09	2.9e-09	5.38e-09	0.284415	-2.92e-10	-3.55e-10	-3.18e-10	-2.76e-10	-4.94e-11	4.54e-10	1.35e-09	2.72e-09	4.47e-09	0.284415	2.31464e-11	9.25801e-12	3.54933e-11	3.08623e-11	5.09351e-11	2.63902e-10	6.94484e-10	1.72693e-09	3.39831e-09
0.28542	-1.54362e-11	9.26026e-12	3.70422e-11	5.40115e-11	6.63606e-11	5.24778e-11	8.33384e-11	1.4506e-10	1.79021e-10	0.28542	-8.82e-11	-9.62e-11	-7.92e-11	-5.37e-11	2.61e-11	1.57e-10	3.53e-10	6.64e-10	1.05e-09	0.28542	-8.18e-11	-6.94e-11	-6.94e-11	-8.03e-11	-1.54e-11	3.27e-10	1.25e-09	2.92e-09	5.37e-09	0.28542	-3.04e-10	-3.55e-10	-3.27e-10	-2.7e-10	-5.25e-11	4.58e-10	1.35e-09	2.73e-09	4.48e-09	0.28542	1.54357e-11	6.17144e-12	2.93252e-11	2.62398e-11	5.70981e-11	2.70066e-10	7.0682e-10	1.73619e-09	3.43072e-09
0.286425	-2.77769e-11	1.543e-11	4.01203e-11	4.7844e-11	6.48168e-11	5.71015e-11	8.17963e-11	1.32732e-10	1.83647e-10	0.286425	-9.76e-11	-1.02e-10	-7.7e-11	-4.35e-11	1.77e-11	1.54e-10	3.61e-10	6.5e-10	1.05e-09	0.286425	-8.8e-11	-6.95e-11	-5.09e-11	-7.72e-11	-1.85e-11	3.16e-10	1.24e-09	2.92e-09	5.39e-09	0.286425	-3.01e-10	-3.56e-10	-3.26e-10	-2.73e-10	-5.71e-11	4.65e-10	1.34e-09	2.71e-09	4.48e-09	0.286425	1.54306e-11	-1.53596e-12	3.08629e-11	3.24106e-11	5.40183e-11	2.51565e-10	7.08373e-10	1.73312e-09	3.46312e-09
0.28743	-3.3946e-11	1.38924e-11	2.93291e-11	4.78362e-11	6.01864e-11	6.17302e-11	8.64216e-11	1.46609e-10	1.77483e-10	0.28743	-1.01e-10	-9.42e-11	-7.42e-11	-5.33e-11	2.99e-11	1.59e-10	3.56e-10	6.55e-10	1.04e-09	0.28743	-8.18e-11	-8.18e-11	-6.17e-11	-6.48e-11	-1.7e-11	3.13e-10	1.25e-09	2.93e-09	5.41e-09	0.28743	-2.95e-10	-3.47e-10	-3.32e-10	-2.64e-10	-6.48e-11	4.66e-10	1.36e-09	2.72e-09	4.48e-09	0.28743	9.26139e-12	1.08035e-11	2.4692e-11	4.32091e-11	6.01869e-11	2.59269e-10	7.26876e-10	1.75162e-09	3.48166e-09
0.288435	-2.31538e-11	2.00599e-11	3.70354e-11	3.24163e-11	5.09312e-11	6.32791e-11	8.48829e-11	1.52778e-10	1.86733e-10	0.288435	-8.85e-11	-8.61e-11	-7.91e-11	-3.86e-11	3.33e-11	1.49e-10	3.57e-10	6.6e-10	1.05e-09	0.288435	-9.57e-11	-8.49e-11	-6.17e-11	-6.79e-11	-1.23e-11	3.1e-10	1.24e-09	2.94e-09	5.41e-09	0.288435	-3.06e-10	-3.58e-10	-3.4e-10	-2.64e-10	-6.33e-11	4.69e-10	1.35e-09	2.7e-09	4.5e-09	0.288435	7.71642e-12	2.46858e-11	1.69817e-11	4.62974e-11	6.32718e-11	2.59269e-10	7.17636e-10	1.75934e-09	3.52948e-09
0.28944	-2.4688e-11	1.852e-11	3.5495e-11	3.70332e-11	4.93845e-11	7.7158e-11	8.95059e-11	1.38903e-10	1.85196e-10	0.28944	-9.8e-11	-9.15e-11	-7.79e-11	-4.91e-11	2.09e-11	1.6e-10	3.54e-10	6.64e-10	1.05e-09	0.28944	-8.95e-11	-7.72e-11	-6.79e-11	-6.48e-11	-1.54e-11	3.1e-10	1.25e-09	2.94e-09	5.45e-09	0.28944	-3.02e-10	-3.43e-10	-3.44e-10	-2.67e-10	-6.94e-11	4.8e-10	1.36e-09	2.73e-09	4.52e-09	0.28944	6.17201e-12	2.00672e-11	2.46858e-11	4.62991e-11	5.86532e-11	2.53101e-10	7.34599e-10	1.76552e-09	3.54338e-09
0.290445	-1.38935e-11	1.85222e-11	3.24056e-11	2.62398e-11	4.62985e-11	7.40799e-11	8.18042e-11	1.46607e-10	1.88279e-10	0.290445	-9.37e-11	-8.97e-11	-7.28e-11	-4.8e-11	2.99e-11	1.65e-10	3.57e-10	6.61e-10	1.06e-09	0.290445	-9.26e-11	-8.95e-11	-6.17e-11	-5.25e-11	-1.39e-11	3.13e-10	1.25e-09	2.95e-09	5.44e-09	0.290445	-3.12e-10	-3.33e-10	-3.55e-10	-2.64e-10	-8.02e-11	4.63e-10	1.36e-09	2.71e-09	4.52e-09	0.290445	1.54441e-12	2.77769e-11	1.38912e-11	4.78395e-11	7.71574e-11	2.53095e-10	7.40778e-10	1.78403e-09	3.56807e-09
0.29145	-1.3885e-11	2.62296e-11	2.00689e-11	2.62308e-11	4.32102e-11	7.71664e-11	1.01852e-10	1.40443e-10	1.86739e-10	0.29145	-9.44e-11	-9.13e-11	-8.11e-11	-4.55e-11	3.42e-11	1.47e-10	3.54e-10	6.61e-10	1.06e-09	0.29145	-9.41e-11	-9.72e-11	-6.64e-11	-6.02e-11	-9.26e-12	3.12e-10	1.26e-09	2.96e-09	5.43e-09	0.29145	-3.26e-10	-3.36e-10	-3.46e-10	-2.62e-10	-7.87e-11	4.8e-10	1.37e-09	2.71e-09	4.52e-09	0.29145	1.12606e-15	2.93162e-11	7.7198e-12	4.32131e-11	7.71664e-11	2.43841e-10	7.51578e-10	1.79175e-09	3.59431e-09
0.292455	-1.54779e-12	1.69772e-11	2.46863e-11	1.23581e-11	3.54983e-11	8.64267e-11	1.09569e-10	1.45064e-10	1.8982e-10	0.292455	-9.28e-11	-9.71e-11	-8.43e-11	-3.76e-11	3.27e-11	1.58e-10	3.54e-10	6.68e-10	1.05e-09	0.292455	-8.8e-11	-9.11e-11	-7.1e-11	-5.25e-11	4.63e-12	3.07e-10	1.24e-09	2.94e-09	5.43e-09	0.292455	-3.35e-10	-3.32e-10	-3.55e-10	-2.7e-10	-7.1e-11	4.68e-10	1.37e-09	2.69e-09	4.53e-09	0.292455	1.54216e-12	1.39008e-11	1.08052e-11	4.16698e-11	8.33356e-11	2.40754e-10	7.59295e-10	1.79022e-09	3.62209e-09
0.29346	-1.54216e-12	1.08052e-11	1.2348e-11	3.08578e-11	3.55028e-11	1.03393e-10	1.06489e-10	1.37352e-10	1.8365e-10	0.29346	-1e-10	-8.71e-11	-7.8e-11	-5.06e-11	3.35e-11	1.63e-10	3.54e-10	6.73e-10	1.06e-09	0.29346	-8.8e-11	-9.26e-11	-8.18e-11	-5.25e-11	6.17e-12	3.07e-10	1.24e-09	2.95e-09	5.43e-09	0.29346	-3.3e-10	-3.26e-10	-3.61e-10	-2.84e-10	-7.1e-11	4.71e-10	1.37e-09	2.69e-09	4.52e-09	0.29346	2.25211e-15	2.9319e-11	2.00576e-11	4.32097e-11	8.48795e-11	2.4384e-10	7.65466e-10	1.82415e-09	3.6514e-09
0.294465	1.54272e-12	1.08019e-11	4.63379e-12	2.77819e-11	5.55492e-11	1.01858e-10	1.11116e-10	1.28094e-10	1.75939e-10	0.294465	-9.04e-11	-8.42e-11	-7.95e-11	-4.33e-11	3.07e-11	1.57e-10	3.63e-10	6.69e-10	1.07e-09	0.294465	-7.56e-11	-8.18e-11	-7.41e-11	-5.56e-11	1.08e-11	3.18e-10	1.23e-09	2.94e-09	5.43e-09	0.294465	-3.49e-10	-3.27e-10	-3.61e-10	-2.79e-10	-6.64e-11	4.65e-10	1.37e-09	2.68e-09	4.52e-09	0.294465	4.6276e-12	3.54899e-11	1.54357e-11	3.85832e-11	8.33362e-11	2.51553e-10	7.65471e-10	1.83805e-09	3.66222e-09
0.29547	3.08826e-12	7.71585e-12	7.71642e-12	3.24084e-11	5.09317e-11	1.03394e-10	1.15742e-10	1.23468e-10	1.80559e-10	0.29547	-9.52e-11	-9.22e-11	-7.92e-11	-4.55e-11	3.05e-11	1.54e-10	3.63e-10	6.84e-10	1.07e-09	0.29547	-6.94e-11	-7.72e-11	-8.18e-11	-6.02e-11	9.26e-12	3.21e-10	1.22e-09	2.93e-09	5.43e-09	0.29547	-3.4e-10	-3.18e-10	-3.57e-10	-2.82e-10	-5.4e-11	4.63e-10	1.39e-09	2.69e-09	4.52e-09	0.29547	3.08826e-12	2.62409e-11	1.85205e-11	3.70343e-11	7.87114e-11	2.53101e-10	7.73185e-10	1.85194e-09	3.68382e-09
0.296475	9.25632e-12	3.08769e-12	1.0803e-11	3.54961e-11	5.55616e-11	8.95138e-11	1.09576e-10	1.32716e-10	1.71307e-10	0.296475	-9.21e-11	-9.23e-11	-7.84e-11	-4.16e-11	2.67e-11	1.52e-10	3.58e-10	6.8e-10	1.05e-09	0.296475	-6.79e-11	-7.1e-11	-9.11e-11	-6.17e-11	9.26e-12	3.23e-10	1.23e-09	2.93e-09	5.45e-09	0.296475	-3.43e-10	-3.35e-10	-3.56e-10	-2.93e-10	-5.25e-11	4.52e-10	1.39e-09	2.7e-09	4.5e-09	0.296475	6.1782e-12	3.08651e-11	2.46886e-11	2.31554e-11	8.48772e-11	2.62354e-10	7.80899e-10	1.86428e-09	3.69925e-09
0.29748	6.17482e-12	1.53934e-12	1.38896e-11	4.01276e-11	6.94438e-11	8.48834e-11	1.11116e-10	1.25006e-10	1.6976e-10	0.29748	-1e-10	-9.39e-11	-7.07e-11	-3.66e-11	2.57e-11	1.59e-10	3.56e-10	6.79e-10	1.06e-09	0.29748	-6.64e-11	-6.64e-11	-9.26e-11	-6.02e-11	1.54e-11	3.38e-10	1.22e-09	2.94e-09	5.45e-09	0.29748	-3.4e-10	-3.29e-10	-3.53e-10	-2.96e-10	-4.48e-11	4.51e-10	1.4e-09	2.71e-09	4.5e-09	0.29748	2.31419e-11	3.39489e-11	2.00706e-11	2.62308e-11	8.17957e-11	2.59277e-10	7.80904e-10	1.86892e-09	3.7008e-09
0.298485	7.71417e-12	-1.07996e-11	1.69761e-11	5.09233e-11	7.25349e-11	8.79627e-11	1.12658e-10	1.17291e-10	1.65131e-10	0.298485	-9.67e-11	-8.37e-11	-8.77e-11	-5.29e-11	2.7e-11	1.56e-10	3.56e-10	6.69e-10	1.07e-09	0.298485	-7.41e-11	-6.02e-11	-9.11e-11	-8.02e-11	4.64e-12	3.43e-10	1.21e-09	2.94e-09	5.45e-09	0.298485	-3.33e-10	-3.29e-10	-3.55e-10	-3.07e-10	-4.17e-11	4.41e-10	1.39e-09	2.71e-09	4.5e-09	0.298485	2.00632e-11	2.77774e-11	3.70309e-11	1.5434e-11	8.33334e-11	2.70068e-10	7.8707e-10	1.89361e-09	3.72086e-09
0.29949	3.08826e-12	-1.38907e-11	2.0061e-11	4.78457e-11	7.71597e-11	7.87125e-11	1.09573e-10	1.14206e-10	1.60505e-10	0.29949	-9.31e-11	-9.1e-11	-7.49e-11	-5.27e-11	3.03e-11	1.54e-10	3.54e-10	6.76e-10	1.07e-09	0.29949	-6.79e-11	-6.02e-11	-9.72e-11	-7.87e-11	1.23e-11	3.33e-10	1.23e-09	2.94e-09	5.46e-09	0.29949	-3.23e-10	-3.26e-10	-3.49e-10	-3.06e-10	-4.32e-11	4.37e-10	1.36e-09	2.71e-09	4.5e-09	0.29949	1.85256e-11	1.69795e-11	3.24112e-11	7.72374e-12	7.4081e-11	2.6391e-10	7.80907e-10	1.91829e-09	3.75172e-09
0.300495	3.08094e-12	-2.00582e-11	1.85256e-11	5.5556e-11	6.9454e-11	8.33339e-11	1.06489e-10	1.20374e-10	1.65129e-10	0.300495	-9.78e-11	-9.71e-11	-7.87e-11	-3.81e-11	3.37e-11	1.53e-10	3.59e-10	6.72e-10	1.07e-09	0.300495	-6.94e-11	-5.86e-11	-9.41e-11	-8.8e-11	4.63e-12	3.35e-10	1.23e-09	2.95e-09	5.46e-09	0.300495	-3.15e-10	-3.46e-10	-3.36e-10	-3.04e-10	-4.48e-11	4.46e-10	1.37e-09	2.71e-09	4.52e-09	0.300495	3.39427e-11	1.54317e-11	3.39551e-11	2.00559e-11	7.40765e-11	2.80873e-10	7.88616e-10	1.92293e-09	3.7795e-09
0.3015	-1.23401e-11	-1.38907e-11	3.39472e-11	5.70992e-11	7.87018e-11	7.87063e-11	1.09567e-10	1.21924e-10	1.63591e-10	0.3015	-8.77e-11	-8.76e-11	-7.22e-11	-4.83e-11	2.62e-11	1.61e-10	3.7e-10	6.64e-10	1.07e-09	0.3015	-6.33e-11	-5.71e-11	-7.72e-11	-9.26e-11	3.09e-12	3.32e-10	1.25e-09	2.94e-09	5.44e-09	0.3015	-3.06e-10	-3.36e-10	-3.32e-10	-2.89e-10	-3.86e-11	4.32e-10	1.37e-09	2.73e-09	4.52e-09	0.3015	2.31549e-11	1.08064e-11	4.32063e-11	1.38929e-11	7.09882e-11	2.8396e-10	7.91703e-10	1.93219e-09	3.81036e-09
0.302505	-1.08069e-11	-1.0803e-11	3.54961e-11	5.24716e-11	7.2536e-11	7.09922e-11	9.56898e-11	1.358e-10	1.69759e-10	0.302505	-9.12e-11	-8.64e-11	-8.28e-11	-5.3e-11	3.68e-11	1.65e-10	3.66e-10	6.65e-10	1.08e-09	0.302505	-6.17e-11	-7.1e-11	-6.95e-11	-8.95e-11	4.62e-12	3.47e-10	1.24e-09	2.96e-09	5.46e-09	0.302505	-3.04e-10	-3.47e-10	-3.35e-10	-2.89e-10	-3.86e-11	4.48e-10	1.36e-09	2.73e-09	4.5e-09	0.302505	2.7778e-11	1.54289e-11	3.70422e-11	1.69795e-11	6.01903e-11	2.76252e-10	7.90166e-10	1.94916e-09	3.82735e-09
0.30351	-2.00593e-11	-7.71417e-12	3.85849e-11	4.78446e-11	7.09939e-11	6.63629e-11	9.87651e-11	1.26554e-10	1.71307e-10	0.30351	-9.34e-11	-8.58e-11	-8.1e-11	-4.76e-11	2.05e-11	1.55e-10	3.59e-10	6.6e-10	1.08e-09	0.30351	-6.79e-11	-6.17e-11	-7.41e-11	-9.41e-11	-1.08e-11	3.41e-10	1.25e-09	2.98e-09	5.47e-09	0.30351	-2.99e-10	-3.6e-10	-3.32e-10	-2.86e-10	-4.48e-11	4.57e-10	1.36e-09	2.73e-09	4.51e-09	0.30351	2.93207e-11	9.2597e-12	4.01237e-11	2.93156e-11	5.5556e-11	2.79333e-10	8.00962e-10	1.95689e-09	3.86592e-09
0.304515	-2.00632e-11	1.53991e-12	4.93766e-11	5.093e-11	7.71591e-11	6.63601e-11	8.79683e-11	1.31182e-10	1.80561e-10	0.304515	-8.62e-11	-8.74e-11	-8.83e-11	-4.41e-11	2.64e-11	1.59e-10	3.62e-10	6.54e-10	1.07e-09	0.304515	-7.72e-11	-6.94e-11	-7.56e-11	-8.49e-11	-1.23e-11	3.32e-10	1.27e-09	3e-09	5.48e-09	0.304515	-2.99e-10	-3.6e-10	-3.36e-10	-2.75e-10	-4.78e-11	4.49e-10	1.35e-09	2.74e-09	4.48e-09	0.304515	2.62369e-11	3.08938e-12	3.8581e-11	2.31521e-11	4.47625e-11	2.79331e-10	8.05593e-10	1.96923e-09	3.87827e-09
0.30552	-2.16065e-11	1.54835e-12	3.70439e-11	5.86375e-11	6.94494e-11	6.32757e-11	8.02564e-11	1.45064e-10	1.80567e-10	0.30552	-9.37e-11	-9.55e-11	-8.35e-11	-4.52e-11	2.67e-11	1.57e-10	3.61e-10	6.58e-10	1.08e-09	0.30552	-8.49e-11	-6.95e-11	-5.71e-11	-7.56e-11	-1.85e-11	3.3e-10	1.25e-09	3e-09	5.5e-09	0.30552	-3.02e-10	-3.58e-10	-3.3e-10	-2.55e-10	-4.94e-11	4.57e-10	1.36e-09	2.74e-09	4.5e-09	0.30552	2.62319e-11	4.62985e-12	3.39522e-11	2.46987e-11	5.40132e-11	2.70082e-10	8.07138e-10	1.99391e-09	3.89525e-09
0.306525	-2.46903e-11	1.54306e-11	3.85798e-11	4.63002e-11	6.63606e-11	6.32763e-11	8.79643e-11	1.45068e-10	1.88279e-10	0.306525	-9.22e-11	-9.59e-11	-7.81e-11	-5.05e-11	1.97e-11	1.51e-10	3.63e-10	6.54e-10	1.07e-09	0.306525	-7.56e-11	-7.72e-11	-6.48e-11	-7.72e-11	-2.16e-11	3.23e-10	1.26e-09	2.98e-09	5.49e-09	0.306525	-3.09e-10	-3.58e-10	-3.15e-10	-2.65e-10	-6.02e-11	4.69e-10	1.37e-09	2.75e-09	4.49e-09	0.306525	1.54357e-11	6.17539e-12	2.93235e-11	4.32035e-11	5.86414e-11	2.80873e-10	8.10225e-10	1.99084e-09	3.91994e-09
0.30753	-2.16077e-11	2.31442e-11	3.39517e-11	3.85832e-11	6.17313e-11	6.79005e-11	8.7966e-11	1.41985e-10	1.91365e-10	0.30753	-8.78e-11	-9.57e-11	-7.55e-11	-4.22e-11	2.71e-11	1.57e-10	3.68e-10	6.68e-10	1.09e-09	0.30753	-8.64e-11	-8.49e-11	-6.33e-11	-7.41e-11	-2.47e-11	3.27e-10	1.26e-09	2.98e-09	5.52e-09	0.30753	-3.02e-10	-3.52e-10	-3.23e-10	-2.61e-10	-6.17e-11	4.69e-10	1.36e-09	2.74e-09	4.5e-09	0.30753	1.23435e-11	1.38873e-11	2.77785e-11	3.85832e-11	5.40177e-11	2.79336e-10	8.17941e-10	1.98776e-09	3.94617e-09
0.308535	-2.31487e-11	1.69823e-11	2.77842e-11	3.39534e-11	5.70975e-11	6.17347e-11	8.48817e-11	1.48152e-10	1.89827e-10	0.308535	-9.41e-11	-8.7e-11	-8.18e-11	-5.08e-11	3.5e-11	1.58e-10	3.58e-10	6.69e-10	1.08e-09	0.308535	-1e-10	-8.18e-11	-6.64e-11	-6.94e-11	-1.54e-11	3.26e-10	1.26e-09	2.98e-09	5.54e-09	0.308535	-3.06e-10	-3.47e-10	-3.41e-10	-2.64e-10	-7.1e-11	4.75e-10	1.35e-09	2.73e-09	4.52e-09	0.308535	1.54948e-12	1.54317e-11	2.46897e-11	3.70411e-11	5.71026e-11	2.82416e-10	8.28742e-10	2.00626e-09	3.95853e-09
0.30954	-2.31487e-11	2.77718e-11	3.54888e-11	3.24073e-11	4.16754e-11	6.48202e-11	8.48834e-11	1.4507e-10	1.97537e-10	0.30954	-9.83e-11	-8.48e-11	-8.07e-11	-4.45e-11	3.61e-11	1.64e-10	3.6e-10	6.79e-10	1.07e-09	0.30954	-1e-10	-8.95e-11	-6.94e-11	-6.48e-11	-1.39e-11	3.09e-10	1.26e-09	2.99e-09	5.56e-09	0.30954	-3.13e-10	-3.44e-10	-3.47e-10	-2.62e-10	-7.56e-11	4.8e-10	1.37e-09	2.73e-09	4.54e-09	0.30954	7.71135e-12	1.38918e-11	1.38907e-11	4.16698e-11	6.32735e-11	2.71622e-10	8.36458e-10	2.00319e-09	4.00172e-09
0.310545	-2.16037e-11	1.85222e-11	2.46925e-11	2.62386e-11	4.4753e-11	7.4077e-11	9.25953e-11	1.4661e-10	1.95997e-10	0.310545	-9.34e-11	-9.25e-11	-8.32e-11	-5.6e-11	2.94e-11	1.63e-10	3.65e-10	6.8e-10	1.08e-09	0.310545	-1e-10	-9.57e-11	-7.25e-11	-5.56e-11	-1.08e-11	3.13e-10	1.27e-09	3e-09	5.53e-09	0.310545	-3.12e-10	-3.41e-10	-3.58e-10	-2.67e-10	-7.25e-11	4.74e-10	1.38e-09	2.73e-09	4.56e-09	0.310545	0	1.85217e-11	6.1782e-12	4.93806e-11	6.63634e-11	2.71616e-10	8.39547e-10	2.01707e-09	4.00021e-09
0.31155	-1.38929e-11	1.69772e-11	1.38929e-11	2.77757e-11	4.16715e-11	8.17935e-11	9.56836e-11	1.41983e-10	1.94455e-10	0.31155	-9.81e-11	-9.84e-11	-8.37e-11	-5.18e-11	2.44e-11	1.54e-10	3.7e-10	6.78e-10	1.08e-09	0.31155	-9.11e-11	-9.11e-11	-7.41e-11	-6.17e-11	-1.54e-12	3.12e-10	1.25e-09	2.98e-09	5.54e-09	0.31155	-3.32e-10	-3.29e-10	-3.56e-10	-2.61e-10	-7.1e-11	4.81e-10	1.38e-09	2.72e-09	4.55e-09	0.31155	-7.70966e-12	2.93201e-11	1.23423e-11	4.47547e-11	7.56186e-11	2.66989e-10	8.44179e-10	2.02479e-09	4.0403e-09
0.312555	-1.54278e-11	1.85149e-11	1.23463e-11	2.00689e-11	4.62985e-11	8.79638e-11	9.87713e-11	1.4044e-10	1.95997e-10	0.312555	-9.15e-11	-8.61e-11	-8.71e-11	-3.77e-11	2.47e-11	1.6e-10	3.64e-10	6.98e-10	1.08e-09	0.312555	-8.49e-11	-9.26e-11	-6.64e-11	-6.33e-11	3.09e-12	3.18e-10	1.24e-09	2.99e-09	5.53e-09	0.312555	-3.41e-10	-3.33e-10	-3.5e-10	-2.7e-10	-6.94e-11	4.69e-10	1.39e-09	2.71e-09	4.54e-09	0.312555	3.08094e-12	3.395e-11	7.72148e-12	3.85838e-11	7.87063e-11	2.65447e-10	8.5806e-10	2.04176e-09	4.04341e-09
0.31356	-3.09276e-12	7.71811e-12	1.08052e-11	2.93173e-11	5.09272e-11	8.48845e-11	1.04943e-10	1.4352e-10	1.97536e-10	0.31356	-8.96e-11	-8.73e-11	-8.4e-11	-4.2e-11	3.94e-11	1.57e-10	3.58e-10	6.78e-10	1.09e-09	0.31356	-8.49e-11	-9.11e-11	-6.95e-11	-5.71e-11	7.72e-12	3.21e-10	1.24e-09	2.99e-09	5.54e-09	0.31356	-3.36e-10	-3.21e-10	-3.7e-10	-2.84e-10	-6.79e-11	4.72e-10	1.37e-09	2.7e-09	4.53e-09	0.31356	-1.54216e-12	3.24112e-11	1.69756e-11	3.70394e-11	7.87091e-11	2.7007e-10	8.56523e-10	2.04794e-09	4.07734e-09
0.314565	-7.71248e-12	1.54441e-12	1.54295e-11	2.46948e-11	5.24699e-11	9.25965e-11	1.09571e-10	1.32722e-10	1.86737e-10	0.314565	-8.8e-11	-8.9e-11	-8.55e-11	-3.82e-11	2.73e-11	1.59e-10	3.61e-10	6.86e-10	1.08e-09	0.314565	-7.72e-11	-8.64e-11	-8.33e-11	-6.02e-11	1.23e-11	3.18e-10	1.25e-09	2.98e-09	5.54e-09	0.314565	-3.56e-10	-3.33e-10	-3.67e-10	-2.81e-10	-6.48e-11	4.6e-10	1.37e-09	2.71e-09	4.52e-09	0.314565	-3.08488e-12	3.70337e-11	2.46897e-11	3.7036e-11	8.33356e-11	2.62362e-10	8.56527e-10	2.06491e-09	4.08199e-09
0.31557	-1.54272e-12	-1.54328e-12	1.08047e-11	2.62398e-11	4.93918e-11	9.87656e-11	1.08033e-10	1.21924e-10	1.75942e-10	0.31557	-8.58e-11	-9.83e-11	-8.37e-11	-4.06e-11	2.87e-11	1.58e-10	3.61e-10	6.92e-10	1.08e-09	0.31557	-7.72e-11	-8.49e-11	-8.49e-11	-6.79e-11	1.08e-11	3.26e-10	1.24e-09	2.99e-09	5.55e-09	0.31557	-3.47e-10	-3.38e-10	-3.69e-10	-2.84e-10	-6.02e-11	4.55e-10	1.37e-09	2.71e-09	4.52e-09	0.31557	1.68909e-15	2.77808e-11	2.46931e-11	2.93218e-11	8.33339e-11	2.63903e-10	8.68865e-10	2.06492e-09	4.10513e-09
0.316575	6.1675e-12	-4.62929e-12	1.0803e-11	3.85798e-11	6.48095e-11	9.25987e-11	1.15742e-10	1.25005e-10	1.86732e-10	0.316575	-9.67e-11	-9.07e-11	-7.86e-11	-4.6e-11	3.58e-11	1.57e-10	3.62e-10	6.81e-10	1.1e-09	0.316575	-6.94e-11	-7.56e-11	-9.26e-11	-7.56e-11	1.54e-11	3.35e-10	1.24e-09	3.02e-09	5.58e-09	0.316575	-3.44e-10	-3.29e-10	-3.75e-10	-2.87e-10	-4.78e-11	4.6e-10	1.39e-09	2.73e-09	4.52e-09	0.316575	7.71698e-12	2.31549e-11	2.62375e-11	2.00661e-11	7.40832e-11	2.70076e-10	8.70409e-10	2.08651e-09	4.10823e-09
0.31758	-1.54272e-12	-6.17201e-12	1.08052e-11	4.47541e-11	5.71099e-11	9.10565e-11	1.12661e-10	1.25003e-10	1.8365e-10	0.31758	-8.91e-11	-9.11e-11	-7.28e-11	-3.92e-11	3.15e-11	1.61e-10	3.68e-10	6.86e-10	1.08e-09	0.31758	-5.56e-11	-6.48e-11	-9.41e-11	-7.25e-11	7.72e-12	3.33e-10	1.23e-09	3e-09	5.58e-09	0.31758	-3.35e-10	-3.38e-10	-3.63e-10	-3.02e-10	-4.94e-11	4.54e-10	1.38e-09	2.71e-09	4.53e-09	0.31758	1.6975e-11	3.39455e-11	3.24106e-11	2.00604e-11	8.02479e-11	2.7933e-10	8.64245e-10	2.08961e-09	4.12366e-09
0.318585	-7.71248e-12	-4.63492e-12	1.69744e-11	4.78418e-11	7.2527e-11	9.72167e-11	1.12657e-10	1.15747e-10	1.77476e-10	0.318585	-8.73e-11	-9.91e-11	-7.94e-11	-3.69e-11	3.43e-11	1.66e-10	3.69e-10	6.81e-10	1.09e-09	0.318585	-6.17e-11	-6.17e-11	-8.8e-11	-8.02e-11	1.39e-11	3.35e-10	1.24e-09	2.99e-09	5.59e-09	0.318585	-3.18e-10	-3.36e-10	-3.52e-10	-3.06e-10	-4.17e-11	4.41e-10	1.38e-09	2.72e-09	4.51e-09	0.318585	2.31459e-11	2.62347e-11	4.32069e-11	1.38907e-11	7.87063e-11	2.77796e-10	8.75035e-10	2.1035e-09	4.14371e-09
0.31959	-3.08544e-12	-1.69688e-11	1.852e-11	5.09272e-11	6.79084e-11	7.56338e-11	1.06488e-10	1.08038e-10	1.66676e-10	0.31959	-9.68e-11	-8.46e-11	-8.38e-11	-5.36e-11	2.85e-11	1.53e-10	3.71e-10	6.85e-10	1.1e-09	0.31959	-6.02e-11	-5.09e-11	-8.8e-11	-8.49e-11	7.72e-12	3.5e-10	1.26e-09	2.99e-09	5.57e-09	0.31959	-3.15e-10	-3.41e-10	-3.47e-10	-3.02e-10	-4.17e-11	4.46e-10	1.37e-09	2.72e-09	4.51e-09	0.31959	2.00644e-11	1.54351e-11	4.01254e-11	1.08024e-11	7.40782e-11	2.90137e-10	8.67328e-10	2.12664e-09	4.15298e-09
0.320595	4.62309e-12	-9.2597e-12	2.16071e-11	5.09295e-11	7.40793e-11	8.95014e-11	1.04943e-10	1.21915e-10	1.60503e-10	0.320595	-9.06e-11	-8.97e-11	-7.97e-11	-3.7e-11	2.75e-11	1.62e-10	3.77e-10	6.84e-10	1.09e-09	0.320595	-6.33e-11	-5.09e-11	-8.18e-11	-9.26e-11	1.08e-11	3.53e-10	1.25e-09	3e-09	5.58e-09	0.320595	-3.13e-10	-3.49e-10	-3.32e-10	-3.01e-10	-4.48e-11	4.38e-10	1.37e-09	2.72e-09	4.52e-09	0.320595	2.16065e-11	1.08052e-11	3.70416e-11	6.17764e-12	7.09905e-11	3.00935e-10	8.65784e-10	2.13282e-09	4.1715e-09
0.3216	-6.16863e-12	-1.54891e-12	2.7778e-11	5.40166e-11	8.48738e-11	7.87103e-11	1.01854e-10	1.25007e-10	1.57417e-10	0.3216	-9.56e-11	-9.27e-11	-8.83e-11	-4.38e-11	2.79e-11	1.56e-10	3.73e-10	6.84e-10	1.09e-09	0.3216	-5.25e-11	-6.33e-11	-8.64e-11	-1.06e-10	1.54e-12	3.5e-10	1.26e-09	3e-09	5.56e-09	0.3216	-3.1e-10	-3.47e-10	-3.32e-10	-2.89e-10	-4.01e-11	4.49e-10	1.37e-09	2.72e-09	4.51e-09	0.3216	2.46908e-11	1.2348e-11	4.16675e-11	1.3889e-11	6.63595e-11	2.97857e-10	8.70406e-10	2.14516e-09	4.19155e-09
0.322605	-4.63379e-12	-9.25576e-12	3.08662e-11	6.1724e-11	7.71653e-11	7.56175e-11	9.25976e-11	1.31177e-10	1.58964e-10	0.322605	-8.99e-11	-9.88e-11	-8.29e-11	-5.12e-11	2.5e-11	1.64e-10	3.74e-10	6.83e-10	1.1e-09	0.322605	-6.79e-11	-6.17e-11	-7.72e-11	-9.57e-11	-7.71e-12	3.5e-10	1.27e-09	3.02e-09	5.59e-09	0.322605	-2.95e-10	-3.43e-10	-3.15e-10	-2.89e-10	-4.17e-11	4.44e-10	1.38e-09	2.72e-09	4.51e-09	0.322605	2.31498e-11	1.85115e-11	4.32102e-11	2.00576e-11	5.71066e-11	3.02481e-10	8.59613e-10	2.15443e-09	4.20082e-09
0.32361	-1.3889e-11	-6.17088e-12	3.54961e-11	4.93907e-11	7.25366e-11	6.32791e-11	8.48829e-11	1.3118e-10	1.75927e-10	0.32361	-8.89e-11	-9.16e-11	-8.41e-11	-4.83e-11	2.88e-11	1.59e-10	3.72e-10	6.84e-10	1.1e-09	0.32361	-7.1e-11	-5.86e-11	-6.02e-11	-8.64e-11	-6.17e-12	3.35e-10	1.26e-09	3.02e-09	5.6e-09	0.32361	-2.98e-10	-3.56e-10	-3.27e-10	-2.79e-10	-3.55e-11	4.57e-10	1.36e-09	2.74e-09	4.5e-09	0.32361	2.31504e-11	3.09107e-12	4.01276e-11	1.23525e-11	6.17257e-11	3.0094e-10	8.61156e-10	2.1714e-09	4.21934e-09
0.324615	-2.16054e-11	3.08375e-12	4.16664e-11	5.24683e-11	7.40754e-11	6.32757e-11	8.33379e-11	1.34269e-10	1.72853e-10	0.324615	-9.23e-11	-9.45e-11	-8.97e-11	-4.89e-11	3.01e-11	1.6e-10	3.78e-10	6.78e-10	1.1e-09	0.324615	-7.41e-11	-6.64e-11	-6.64e-11	-8.64e-11	-3.09e-12	3.47e-10	1.26e-09	3.04e-09	5.58e-09	0.324615	-2.82e-10	-3.69e-10	-3.24e-10	-2.75e-10	-4.63e-11	4.55e-10	1.36e-09	2.74e-09	4.52e-09	0.324615	2.62347e-11	2.25211e-15	4.3208e-11	2.16032e-11	5.09323e-11	2.97858e-10	8.73496e-10	2.17912e-09	4.2394e-09
0.32562	-2.77769e-11	4.63154e-12	4.16703e-11	4.62996e-11	6.94461e-11	6.63589e-11	8.33356e-11	1.46606e-10	1.83651e-10	0.32562	-8.87e-11	-8.99e-11	-8.17e-11	-4.35e-11	2.42e-11	1.61e-10	3.72e-10	6.83e-10	1.09e-09	0.32562	-8.49e-11	-6.33e-11	-5.25e-11	-8.64e-11	-9.26e-12	3.44e-10	1.27e-09	3.06e-09	5.59e-09	0.32562	-2.78e-10	-3.66e-10	-3.24e-10	-2.75e-10	-4.78e-11	4.63e-10	1.35e-09	2.73e-09	4.51e-09	0.32562	2.62324e-11	3.08713e-12	3.54961e-11	2.31515e-11	5.09295e-11	3.05564e-10	8.78125e-10	2.18683e-09	4.25483e-09
0.326625	-2.77791e-11	1.08013e-11	4.62946e-11	4.32108e-11	6.01909e-11	6.32746e-11	7.8712e-11	1.43529e-10	1.95993e-10	0.326625	-9.02e-11	-8.98e-11	-9.44e-11	-4.89e-11	2.93e-11	1.58e-10	3.6e-10	6.83e-10	1.1e-09	0.326625	-9.11e-11	-7.41e-11	-6.17e-11	-7.72e-11	-2.31e-11	3.36e-10	1.27e-09	3.05e-09	5.58e-09	0.326625	-2.95e-10	-3.6e-10	-3.29e-10	-2.61e-10	-6.17e-11	4.6e-10	1.35e-09	2.73e-09	4.52e-09	0.326625	1.69795e-11	7.71754e-12	2.93201e-11	3.08645e-11	5.40138e-11	2.96314e-10	8.75048e-10	2.18684e-09	4.27336e-09
0.32763	-2.77808e-11	1.23474e-11	4.01259e-11	3.70427e-11	5.8642e-11	6.01914e-11	8.64222e-11	1.51238e-10	1.97542e-10	0.32763	-8.88e-11	-9.41e-11	-8.64e-11	-4.66e-11	2.42e-11	1.6e-10	3.6e-10	6.83e-10	1.11e-09	0.32763	-9.11e-11	-8.18e-11	-6.17e-11	-7.72e-11	-1.54e-11	3.32e-10	1.26e-09	3.08e-09	5.59e-09	0.32763	-3.13e-10	-3.53e-10	-3.32e-10	-2.59e-10	-6.17e-11	4.74e-10	1.36e-09	2.74e-09	4.51e-09	0.32763	1.69727e-11	1.54328e-11	1.69817e-11	3.54938e-11	5.40149e-11	2.96307e-10	8.88928e-10	2.20381e-09	4.3073e-09
0.328635	-3.24039e-11	1.69772e-11	3.54961e-11	4.16647e-11	4.93856e-11	6.63595e-11	8.95071e-11	1.49702e-10	2.03711e-10	0.328635	-9.79e-11	-9.66e-11	-7.6e-11	-4.77e-11	2.76e-11	1.58e-10	3.68e-10	6.92e-10	1.12e-09	0.328635	-9.11e-11	-7.72e-11	-6.33e-11	-6.17e-11	-2.47e-11	3.27e-10	1.26e-09	3.07e-09	5.6e-09	0.328635	-3.07e-10	-3.4e-10	-3.32e-10	-2.59e-10	-6.02e-11	4.77e-10	1.36e-09	2.74e-09	4.54e-09	0.328635	7.71698e-12	2.31431e-11	2.00599e-11	3.54978e-11	5.40177e-11	2.87054e-10	8.93566e-10	2.21461e-09	4.32119e-09
0.32964	-2.31493e-11	2.46886e-11	3.24061e-11	3.54978e-11	4.16715e-11	6.79073e-11	8.33429e-11	1.5895e-10	2.0217e-10	0.32964	-8.99e-11	-9.22e-11	-8.58e-11	-4.94e-11	3.33e-11	1.58e-10	3.76e-10	6.78e-10	1.1e-09	0.32964	-9.88e-11	-8.49e-11	-5.86e-11	-6.33e-11	-1.24e-11	3.27e-10	1.27e-09	3.07e-09	5.6e-09	0.32964	-3.19e-10	-3.41e-10	-3.43e-10	-2.59e-10	-7.1e-11	4.88e-10	1.36e-09	2.73e-09	4.53e-09	0.32964	1.68909e-15	1.38974e-11	1.54328e-11	4.16647e-11	6.17297e-11	2.87052e-10	9.12072e-10	2.20845e-09	4.32892e-09
0.330645	-1.38946e-11	2.16082e-11	2.16088e-11	3.54882e-11	4.16675e-11	7.71614e-11	9.25936e-11	1.46616e-10	2.00627e-10	0.330645	-8.86e-11	-9.09e-11	-8.71e-11	-5.05e-11	3.56e-11	1.6e-10	3.74e-10	6.89e-10	1.1e-09	0.330645	-9.57e-11	-9.88e-11	-5.56e-11	-5.25e-11	-1.08e-11	3.32e-10	1.26e-09	3.08e-09	5.6e-09	0.330645	-3.06e-10	-3.3e-10	-3.49e-10	-2.67e-10	-8.02e-11	4.72e-10	1.37e-09	2.73e-09	4.55e-09	0.330645	-3.08826e-12	2.62324e-11	1.08069e-11	3.70411e-11	6.48185e-11	2.90136e-10	9.07457e-10	2.23004e-09	4.35669e-09
0.33165	-1.85132e-11	2.46886e-11	1.852e-11	1.54424e-11	3.8586e-11	7.87103e-11	9.26004e-11	1.45069e-10	2.00625e-10	0.33165	-8.77e-11	-8.82e-11	-9.38e-11	-4.72e-11	3.8e-11	1.63e-10	3.72e-10	6.92e-10	1.11e-09	0.33165	-9.57e-11	-9.11e-11	-6.79e-11	-6.33e-11	-4.63e-12	3.36e-10	1.27e-09	3.08e-09	5.6e-09	0.33165	-3.3e-10	-3.41e-10	-3.49e-10	-2.62e-10	-7.25e-11	4.8e-10	1.37e-09	2.73e-09	4.55e-09	0.33165	-1.07945e-11	2.93218e-11	1.69778e-11	3.85787e-11	6.94461e-11	2.8859e-10	9.21337e-10	2.22696e-09	4.37366e-09
0.332655	-6.17595e-12	1.69767e-11	1.69756e-11	2.16032e-11	4.62934e-11	8.79643e-11	1.01857e-10	1.45065e-10	1.94454e-10	0.332655	-7.87e-11	-9e-11	-8.76e-11	-4.75e-11	3.78e-11	1.62e-10	3.65e-10	6.99e-10	1.12e-09	0.332655	-8.64e-11	-8.8e-11	-6.79e-11	-4.94e-11	-6.17e-12	3.23e-10	1.28e-09	3.09e-09	5.63e-09	0.332655	-3.35e-10	-3.29e-10	-3.63e-10	-2.73e-10	-7.41e-11	4.77e-10	1.38e-09	2.73e-09	4.53e-09	0.332655	4.62253e-12	3.08645e-11	2.77718e-11	3.08674e-11	6.945e-11	2.76256e-10	9.27515e-10	2.23777e-09	4.38602e-09
0.33366	-1.54666e-12	1.08069e-11	1.38901e-11	2.00666e-11	4.01327e-11	8.95116e-11	1.11114e-10	1.34268e-10	1.88281e-10	0.33366	-8.35e-11	-8.81e-11	-8.72e-11	-5.17e-11	3.23e-11	1.71e-10	3.8e-10	6.98e-10	1.11e-09	0.33366	-8.8e-11	-9.57e-11	-8.33e-11	-5.86e-11	3.09e-12	3.3e-10	1.29e-09	3.07e-09	5.65e-09	0.33366	-3.33e-10	-3.36e-10	-3.73e-10	-2.76e-10	-6.79e-11	4.77e-10	1.38e-09	2.72e-09	4.52e-09	0.33366	3.9412e-15	2.93258e-11	1.85239e-11	2.77814e-11	7.5622e-11	2.85504e-10	9.3831e-10	2.26553e-09	4.40762e-09
0.334665	-6.16976e-12	1.54289e-11	1.23446e-11	2.93184e-11	5.40115e-11	9.41375e-11	1.142e-10	1.31181e-10	1.82111e-10	0.334665	-8.8e-11	-9.42e-11	-8.6e-11	-4.65e-11	3.71e-11	1.56e-10	3.71e-10	7.03e-10	1.11e-09	0.334665	-7.87e-11	-8.8e-11	-8.18e-11	-5.71e-11	1.08e-11	3.27e-10	1.27e-09	3.08e-09	5.66e-09	0.334665	-3.41e-10	-3.32e-10	-3.72e-10	-2.81e-10	-6.48e-11	4.72e-10	1.38e-09	2.71e-09	4.53e-09	0.334665	6.16807e-12	3.70354e-11	2.16082e-11	3.08645e-11	8.48789e-11	2.83967e-10	9.30609e-10	2.264e-09	4.42151e-09
0.33567	-1.54272e-12	9.25801e-12	6.17482e-12	2.7783e-11	5.8642e-11	9.10532e-11	1.09578e-10	1.3426e-10	1.85192e-10	0.33567	-7.95e-11	-1e-10	-8.63e-11	-4.89e-11	3.24e-11	1.64e-10	3.69e-10	6.96e-10	1.11e-09	0.33567	-7.41e-11	-7.1e-11	-8.49e-11	-6.64e-11	1.39e-11	3.33e-10	1.29e-09	3.04e-09	5.66e-09	0.33567	-3.46e-10	-3.3e-10	-3.64e-10	-2.86e-10	-6.33e-11	4.66e-10	1.38e-09	2.71e-09	4.53e-09	0.33567	-1.53596e-12	3.54944e-11	3.08617e-11	3.08606e-11	8.95042e-11	2.90132e-10	9.49111e-10	2.27943e-09	4.43231e-09
0.336675	4.62816e-12	-1.53765e-12	4.63717e-12	3.70343e-11	5.5565e-11	8.64295e-11	1.17285e-10	1.21919e-10	1.82107e-10	0.336675	-9.67e-11	-8.92e-11	-7.99e-11	-4.98e-11	3.36e-11	1.58e-10	3.79e-10	6.99e-10	1.11e-09	0.336675	-6.94e-11	-7.25e-11	-8.33e-11	-7.56e-11	1.23e-11	3.47e-10	1.29e-09	3.05e-09	5.67e-09	0.336675	-3.36e-10	-3.29e-10	-3.67e-10	-2.93e-10	-6.02e-11	4.58e-10	1.39e-09	2.71e-09	4.53e-09	0.336675	1.08013e-11	3.08679e-11	2.93246e-11	1.69812e-11	7.71692e-11	2.82428e-10	9.46031e-10	2.28869e-09	4.44003e-09
0.33768	6.17257e-12	3.0815e-12	2.3138e-11	3.39567e-11	7.09865e-11	9.72195e-11	1.1266e-10	1.08037e-10	1.79021e-10	0.33768	-8.46e-11	-8.81e-11	-7.73e-11	-4.6e-11	2.96e-11	1.65e-10	3.65e-10	7e-10	1.12e-09	0.33768	-5.71e-11	-6.64e-11	-9.57e-11	-7.56e-11	1.08e-11	3.33e-10	1.29e-09	3.06e-09	5.65e-09	0.33768	-3.32e-10	-3.27e-10	-3.46e-10	-2.99e-10	-4.32e-11	4.58e-10	1.39e-09	2.71e-09	4.53e-09	0.33768	1.85149e-11	3.24056e-11	3.39494e-11	1.69756e-11	7.87063e-11	2.94764e-10	9.38325e-10	2.30875e-09	4.45237e-09
0.338685	6.17257e-12	-6.17144e-12	1.08097e-11	4.32108e-11	7.40759e-11	8.79688e-11	1.09571e-10	1.14204e-10	1.75933e-10	0.338685	-8.32e-11	-9.61e-11	-8.38e-11	-4.36e-11	2.97e-11	1.63e-10	3.67e-10	6.98e-10	1.11e-09	0.338685	-6.48e-11	-6.02e-11	-1.03e-10	-7.56e-11	4.63e-12	3.49e-10	1.31e-09	3.07e-09	5.66e-09	0.338685	-3.29e-10	-3.23e-10	-3.52e-10	-2.95e-10	-3.7e-11	4.49e-10	1.38e-09	2.71e-09	4.52e-09	0.338685	1.38941e-11	2.4692e-11	3.08691e-11	1.54317e-11	7.71619e-11	2.97858e-10	9.53742e-10	2.31956e-09	4.46009e-09
0.33969	4.63041e-12	-1.07996e-11	1.69772e-11	4.93879e-11	7.25366e-11	8.33379e-11	1.00322e-10	1.23459e-10	1.6822e-10	0.33969	-8.3e-11	-9.66e-11	-7.76e-11	-4.97e-11	3.03e-11	1.64e-10	3.79e-10	6.91e-10	1.12e-09	0.33969	-6.17e-11	-5.71e-11	-8.95e-11	-7.72e-11	7.72e-12	3.5e-10	1.31e-09	3.07e-09	5.65e-09	0.33969	-3.23e-10	-3.36e-10	-3.46e-10	-2.98e-10	-3.86e-11	4.54e-10	1.39e-09	2.72e-09	4.51e-09	0.33969	2.16037e-11	1.5434e-11	3.70377e-11	1.08035e-11	6.94511e-11	3.11734e-10	9.4912e-10	2.34116e-09	4.47244e-09
0.340695	4.62535e-12	-6.17539e-12	2.62341e-11	6.32667e-11	7.71636e-11	8.02496e-11	1.14195e-10	1.23464e-10	1.65134e-10	0.340695	-7.98e-11	-8.75e-11	-7.82e-11	-4.69e-11	2.21e-11	1.63e-10	3.8e-10	6.92e-10	1.12e-09	0.340695	-5.56e-11	-6.33e-11	-8.49e-11	-9.41e-11	1.08e-11	3.53e-10	1.29e-09	3.07e-09	5.67e-09	0.340695	-3.23e-10	-3.35e-10	-3.41e-10	-2.99e-10	-4.32e-11	4.51e-10	1.38e-09	2.73e-09	4.53e-09	0.340695	2.31481e-11	9.2642e-12	4.01248e-11	7.71923e-12	7.09877e-11	3.00946e-10	9.47579e-10	2.34888e-09	4.48324e-09
0.3417	-7.7136e-12	-7.71698e-12	3.08645e-11	5.5561e-11	8.02462e-11	7.40742e-11	1.04944e-10	1.28091e-10	1.69763e-10	0.3417	-8.38e-11	-9.36e-11	-8.35e-11	-4.72e-11	2.89e-11	1.6e-10	3.76e-10	6.81e-10	1.12e-09	0.3417	-6.79e-11	-6.17e-11	-7.41e-11	-9.57e-11	-6.16e-12	3.6e-10	1.28e-09	3.07e-09	5.65e-09	0.3417	-3.12e-10	-3.49e-10	-3.38e-10	-2.96e-10	-3.7e-11	4.48e-10	1.38e-09	2.73e-09	4.53e-09	0.3417	2.16093e-11	1.54306e-11	4.1667e-11	1.23423e-11	6.32729e-11	3.07113e-10	9.53746e-10	2.35968e-09	4.50947e-09
0.342705	-1.23474e-11	-1.07979e-11	3.24084e-11	5.55571e-11	7.09922e-11	5.86555e-11	9.72285e-11	1.28093e-10	1.80562e-10	0.342705	-8.07e-11	-8.31e-11	-9.32e-11	-4.39e-11	3.67e-11	1.64e-10	3.76e-10	6.88e-10	1.13e-09	0.342705	-7.1e-11	-6.17e-11	-7.25e-11	-8.95e-11	1.53e-12	3.52e-10	1.31e-09	3.08e-09	5.66e-09	0.342705	-3.07e-10	-3.55e-10	-3.29e-10	-2.89e-10	-4.17e-11	4.58e-10	1.37e-09	2.73e-09	4.54e-09	0.342705	2.93134e-11	1.54295e-11	3.85843e-11	6.17708e-12	5.09306e-11	3.11746e-10	9.52205e-10	2.36123e-09	4.51873e-09
0.34371	-2.00604e-11	-5.63029e-16	3.24146e-11	5.24739e-11	6.48207e-11	7.25248e-11	9.4142e-11	1.29636e-10	1.85196e-10	0.34371	-7.96e-11	-9.19e-11	-8.26e-11	-4.43e-11	2.51e-11	1.64e-10	3.75e-10	6.89e-10	1.12e-09	0.34371	-7.1e-11	-6.64e-11	-6.79e-11	-8.8e-11	-1.39e-11	3.47e-10	1.3e-09	3.09e-09	5.67e-09	0.34371	-3.06e-10	-3.63e-10	-3.26e-10	-2.81e-10	-3.7e-11	4.6e-10	1.37e-09	2.73e-09	4.51e-09	0.34371	1.2353e-11	6.17482e-12	4.16653e-11	1.08035e-11	4.47586e-11	3.22541e-10	9.49122e-10	2.36894e-09	4.52183e-09
0.344715	-2.1606e-11	9.25632e-12	4.78328e-11	5.55554e-11	6.63601e-11	6.01897e-11	9.56768e-11	1.32725e-10	1.95993e-10	0.344715	-7.53e-11	-1.01e-10	-8.48e-11	-5.1e-11	3.1e-11	1.68e-10	3.81e-10	6.98e-10	1.1e-09	0.344715	-8.33e-11	-6.64e-11	-6.33e-11	-8.95e-11	-9.27e-12	3.47e-10	1.31e-09	3.11e-09	5.69e-09	0.344715	-3.07e-10	-3.61e-10	-3.27e-10	-2.59e-10	-5.09e-11	4.68e-10	1.36e-09	2.72e-09	4.52e-09	0.344715	1.38896e-11	1.54948e-12	3.5495e-11	1.69744e-11	4.78418e-11	3.17918e-10	9.52208e-10	2.37974e-09	4.56194e-09
0.34572	-2.31481e-11	9.26139e-12	3.85832e-11	5.09272e-11	6.48196e-11	5.24784e-11	7.87165e-11	1.43521e-10	1.95998e-10	0.34572	-9.15e-11	-8.69e-11	-8.58e-11	-4.83e-11	2.49e-11	1.65e-10	3.76e-10	6.89e-10	1.12e-09	0.34572	-7.56e-11	-5.87e-11	-5.4e-11	-9.1e-11	-2.31e-11	3.4e-10	1.31e-09	3.09e-09	5.67e-09	0.34572	-3.12e-10	-3.52e-10	-3.24e-10	-2.69e-10	-4.94e-11	4.63e-10	1.37e-09	2.73e-09	4.52e-09	0.34572	1.54323e-11	1.38845e-11	2.77808e-11	1.85233e-11	5.09261e-11	3.17913e-10	9.61462e-10	2.39363e-09	4.58355e-09
0.346725	-2.16065e-11	1.38884e-11	3.24129e-11	4.32148e-11	6.78983e-11	6.32696e-11	8.64199e-11	1.41987e-10	1.97548e-10	0.346725	-7.73e-11	-1.02e-10	-7.83e-11	-5.64e-11	2.84e-11	1.6e-10	3.76e-10	6.83e-10	1.12e-09	0.346725	-8.95e-11	-7.41e-11	-5.71e-11	-7.56e-11	-2.01e-11	3.35e-10	1.32e-09	3.09e-09	5.69e-09	0.346725	-3.09e-10	-3.61e-10	-3.27e-10	-2.62e-10	-6.02e-11	4.65e-10	1.37e-09	2.76e-09	4.55e-09	0.346725	1.54323e-11	1.23463e-11	2.4692e-11	3.08617e-11	4.78446e-11	3.08662e-10	9.61467e-10	2.39672e-09	4.5959e-09
0.34773	-2.16071e-11	1.54357e-11	3.70354e-11	4.3208e-11	5.40211e-11	6.0192e-11	8.33396e-11	1.52779e-10	2.19132e-10	0.34773	-7.91e-11	-9.84e-11	-7.98e-11	-4.75e-11	2.61e-11	1.63e-10	3.71e-10	6.9e-10	1.13e-09	0.34773	-9.72e-11	-8.03e-11	-5.71e-11	-7.56e-11	-2.01e-11	3.33e-10	1.3e-09	3.1e-09	5.68e-09	0.34773	-3.07e-10	-3.43e-10	-3.23e-10	-2.69e-10	-6.64e-11	4.72e-10	1.36e-09	2.76e-09	4.54e-09	0.34773	1.3889e-11	1.08019e-11	2.00644e-11	3.24101e-11	5.24716e-11	3.13284e-10	9.66098e-10	2.40135e-09	4.60979e-09
0.348735	-2.46903e-11	2.46903e-11	3.24084e-11	3.24129e-11	5.70953e-11	6.79011e-11	8.64216e-11	1.46614e-10	2.00635e-10	0.348735	-8.67e-11	-9e-11	-8.88e-11	-5e-11	3.06e-11	1.68e-10	3.86e-10	6.89e-10	1.13e-09	0.348735	-9.41e-11	-9.26e-11	-5.86e-11	-5.87e-11	-1.85e-11	3.35e-10	1.31e-09	3.11e-09	5.7e-09	0.348735	-2.99e-10	-3.43e-10	-3.46e-10	-2.65e-10	-6.94e-11	4.61e-10	1.37e-09	2.75e-09	4.56e-09	0.348735	1.08002e-11	6.1782e-12	2.0061e-11	3.70377e-11	5.71015e-11	3.10197e-10	9.76898e-10	2.39827e-09	4.64065e-09
0.34974	-2.16071e-11	2.77729e-11	2.62369e-11	3.2405e-11	4.32164e-11	6.63663e-11	8.33435e-11	1.45068e-10	2.03715e-10	0.34974	-9.08e-11	-8.63e-11	-8.43e-11	-4.86e-11	4.05e-11	1.62e-10	3.77e-10	7.02e-10	1.13e-09	0.34974	-1e-10	-8.95e-11	-6.48e-11	-6.02e-11	-1.54e-11	3.32e-10	1.3e-09	3.13e-09	5.73e-09	0.34974	-3.1e-10	-3.27e-10	-3.56e-10	-2.69e-10	-6.94e-11	4.81e-10	1.37e-09	2.75e-09	4.53e-09	0.34974	-2.25211e-15	1.54328e-11	1.54351e-11	3.85804e-11	6.17302e-11	2.99403e-10	9.87699e-10	2.40906e-09	4.6638e-09
0.350745	-2.16026e-11	1.38969e-11	2.31487e-11	2.16122e-11	4.1667e-11	7.87041e-11	9.72218e-11	1.40441e-10	2.09883e-10	0.350745	-8.59e-11	-8.68e-11	-8.4e-11	-5.44e-11	3.33e-11	1.63e-10	3.74e-10	7.03e-10	1.12e-09	0.350745	-8.64e-11	-9.11e-11	-6.64e-11	-6.17e-11	-1.7e-11	3.29e-10	1.3e-09	3.15e-09	5.73e-09	0.350745	-3.21e-10	-3.19e-10	-3.5e-10	-2.64e-10	-6.94e-11	4.74e-10	1.38e-09	2.74e-09	4.54e-09	0.350745	-1.69649e-11	2.46925e-11	1.6975e-11	3.54933e-11	6.32774e-11	3.05566e-10	9.92332e-10	2.41524e-09	4.67924e-09
0.35175	-1.23491e-11	2.00593e-11	1.85177e-11	2.77746e-11	3.55034e-11	8.17963e-11	9.72347e-11	1.4198e-10	2.06795e-10	0.35175	-8.49e-11	-8.59e-11	-8.05e-11	-5.7e-11	2.95e-11	1.55e-10	3.75e-10	7.05e-10	1.12e-09	0.35175	-9.26e-11	-9.57e-11	-8.02e-11	-6.02e-11	-1.69e-15	3.3e-10	1.29e-09	3.13e-09	5.73e-09	0.35175	-3.29e-10	-3.13e-10	-3.61e-10	-2.79e-10	-7.1e-11	4.75e-10	1.38e-09	2.72e-09	4.56e-09	0.35175	-3.0922e-12	3.3946e-11	1.54334e-11	2.62414e-11	7.25321e-11	3.00938e-10	1.00005e-09	2.41216e-09	4.69313e-09
0.352755	-1.08002e-11	1.69789e-11	9.26477e-12	2.16088e-11	5.0921e-11	9.10487e-11	1.18823e-10	1.37356e-10	1.91376e-10	0.352755	-8.48e-11	-9.08e-11	-8.43e-11	-5.26e-11	3.24e-11	1.64e-10	3.73e-10	6.93e-10	1.13e-09	0.352755	-8.33e-11	-9.57e-11	-8.49e-11	-6.02e-11	1.23e-11	3.38e-10	1.29e-09	3.13e-09	5.75e-09	0.352755	-3.35e-10	-3.19e-10	-3.53e-10	-2.73e-10	-6.79e-11	4.85e-10	1.37e-09	2.73e-09	4.57e-09	0.352755	-4.63098e-12	2.62409e-11	1.54311e-11	3.24056e-11	7.56186e-11	2.90145e-10	1.00468e-09	2.41987e-09	4.71318e-09
0.35376	-1.54722e-12	2.15981e-11	1.38867e-11	2.31487e-11	4.6303e-11	8.64301e-11	1.12659e-10	1.41977e-10	2.00622e-10	0.35376	-9.05e-11	-9.33e-11	-9.01e-11	-4.78e-11	3.47e-11	1.66e-10	3.77e-10	7.05e-10	1.14e-09	0.35376	-7.56e-11	-8.49e-11	-8.64e-11	-6.33e-11	7.72e-12	3.3e-10	1.29e-09	3.14e-09	5.77e-09	0.35376	-3.29e-10	-3.21e-10	-3.73e-10	-2.79e-10	-5.56e-11	4.75e-10	1.39e-09	2.72e-09	4.58e-09	0.35376	-9.25407e-12	3.24084e-11	1.08075e-11	2.9319e-11	7.25383e-11	2.99393e-10	1.01394e-09	2.43684e-09	4.71011e-09
0.354765	-3.08488e-12	4.6383e-12	1.08052e-11	2.31504e-11	5.40127e-11	9.87617e-11	1.04951e-10	1.32723e-10	1.96e-10	0.354765	-8.44e-11	-9.6e-11	-8.72e-11	-5.53e-11	3.04e-11	1.7e-10	3.77e-10	7.05e-10	1.13e-09	0.354765	-6.48e-11	-7.72e-11	-8.95e-11	-5.56e-11	1.08e-11	3.36e-10	1.28e-09	3.13e-09	5.75e-09	0.354765	-3.38e-10	-3.29e-10	-3.81e-10	-2.79e-10	-5.86e-11	4.78e-10	1.38e-09	2.72e-09	4.57e-09	0.354765	1.53934e-12	3.70388e-11	1.8516e-11	1.69817e-11	8.02451e-11	2.97854e-10	1.02319e-09	2.45228e-09	4.73479e-09
0.35577	5.63029e-16	1.08002e-11	1.38839e-11	2.62381e-11	5.55588e-11	8.797e-11	1.17283e-10	1.25011e-10	1.99079e-10	0.35577	-8.38e-11	-9.11e-11	-7.74e-11	-4.57e-11	3.35e-11	1.63e-10	3.75e-10	7.05e-10	1.14e-09	0.35577	-6.48e-11	-7.56e-11	-9.57e-11	-6.17e-11	1.39e-11	3.44e-10	1.29e-09	3.14e-09	5.77e-09	0.35577	-3.26e-10	-3.36e-10	-3.72e-10	-2.89e-10	-6.17e-11	4.61e-10	1.37e-09	2.71e-09	4.56e-09	0.35577	1.54554e-12	4.16619e-11	1.69829e-11	2.00604e-11	7.25377e-11	2.97855e-10	1.02165e-09	2.46771e-09	4.7348e-09
0.356775	4.6276e-12	9.25407e-12	1.55342e-12	3.54933e-11	5.86448e-11	8.48829e-11	1.12662e-10	1.31174e-10	1.89821e-10	0.356775	-8.14e-11	-1e-10	-8.37e-11	-4.72e-11	2.72e-11	1.64e-10	3.83e-10	7.05e-10	1.14e-09	0.356775	-6.94e-11	-6.94e-11	-1.03e-10	-6.94e-11	1.23e-11	3.47e-10	1.29e-09	3.14e-09	5.78e-09	0.356775	-3.24e-10	-3.36e-10	-3.67e-10	-2.92e-10	-3.86e-11	4.57e-10	1.38e-09	2.72e-09	4.55e-09	0.356775	7.71529e-12	2.77864e-11	3.39455e-11	1.69756e-11	7.40787e-11	3.00944e-10	1.02166e-09	2.46926e-09	4.74868e-09
0.35778	3.08488e-12	-7.70854e-12	1.69705e-11	3.85872e-11	6.17313e-11	8.79649e-11	1.14199e-10	1.23463e-10	1.72858e-10	0.35778	-8.05e-11	-8.91e-11	-7.64e-11	-5.3e-11	2.52e-11	1.6e-10	3.76e-10	7.08e-10	1.14e-09	0.35778	-6.33e-11	-6.17e-11	-9.72e-11	-7.1e-11	1.54e-11	3.52e-10	1.29e-09	3.13e-09	5.77e-09	0.35778	-3.23e-10	-3.3e-10	-3.67e-10	-3.01e-10	-4.78e-11	4.48e-10	1.39e-09	2.71e-09	4.56e-09	0.35778	1.08047e-11	3.395e-11	3.24118e-11	1.23463e-11	7.8703e-11	3.13284e-10	1.02782e-09	2.49086e-09	4.75486e-09
0.358785	-3.08375e-12	-3.09163e-12	1.69795e-11	5.55515e-11	6.4819e-11	8.48795e-11	1.04951e-10	1.15747e-10	1.83643e-10	0.358785	-8.72e-11	-9.55e-11	-7.86e-11	-4.31e-11	3e-11	1.59e-10	3.73e-10	7.11e-10	1.13e-09	0.358785	-6.17e-11	-6.17e-11	-9.41e-11	-8.8e-11	9.26e-12	3.52e-10	1.3e-09	3.13e-09	5.78e-09	0.358785	-3.1e-10	-3.4e-10	-3.58e-10	-2.96e-10	-4.78e-11	4.49e-10	1.39e-09	2.72e-09	4.54e-09	0.358785	1.852e-11	3.395e-11	3.8581e-11	7.71585e-12	7.09916e-11	3.19455e-10	1.02012e-09	2.50629e-09	4.75949e-09
0.35979	-1.54328e-12	-1.23451e-11	2.62313e-11	5.40172e-11	7.09905e-11	7.87097e-11	1.15738e-10	1.09578e-10	1.72854e-10	0.35979	-7.83e-11	-9.45e-11	-8.16e-11	-5.4e-11	2.93e-11	1.59e-10	3.83e-10	7.05e-10	1.14e-09	0.35979	-6.02e-11	-6.48e-11	-9.41e-11	-8.18e-11	1.23e-11	3.55e-10	1.31e-09	3.15e-09	5.76e-09	0.35979	-3.09e-10	-3.55e-10	-3.49e-10	-2.93e-10	-2.78e-11	4.44e-10	1.39e-09	2.74e-09	4.57e-09	0.35979	2.77735e-11	2.77763e-11	4.16658e-11	1.54722e-12	6.48173e-11	3.13293e-10	1.02937e-09	2.51555e-09	4.78726e-09
0.360795	-3.9412e-15	-1.85115e-11	2.31538e-11	5.86391e-11	7.56198e-11	7.87063e-11	1.03403e-10	1.15743e-10	1.79018e-10	0.360795	-8.16e-11	-9.58e-11	-8.33e-11	-4.67e-11	2.72e-11	1.64e-10	3.82e-10	7.04e-10	1.14e-09	0.360795	-6.33e-11	-6.79e-11	-8.18e-11	-7.72e-11	1.08e-11	3.6e-10	1.31e-09	3.14e-09	5.75e-09	0.360795	-2.95e-10	-3.5e-10	-3.4e-10	-2.98e-10	-4.01e-11	4.41e-10	1.38e-09	2.74e-09	4.57e-09	0.360795	2.16105e-11	1.38946e-11	3.70405e-11	6.17032e-12	5.71032e-11	3.25631e-10	1.02628e-09	2.53098e-09	4.79807e-09
0.3618	-9.25632e-12	-3.0922e-12	3.24073e-11	4.7848e-11	7.71625e-11	7.56198e-11	9.87735e-11	1.14206e-10	1.77478e-10	0.3618	-8.11e-11	-9.56e-11	-8.37e-11	-4.84e-11	3.71e-11	1.57e-10	3.84e-10	6.94e-10	1.14e-09	0.3618	-6.33e-11	-6.64e-11	-7.56e-11	-9.1e-11	-1.54e-12	3.63e-10	1.31e-09	3.14e-09	5.75e-09	0.3618	-2.93e-10	-3.55e-10	-3.27e-10	-2.87e-10	-3.86e-11	4.48e-10	1.38e-09	2.74e-09	4.55e-09	0.3618	2.77763e-11	1.38896e-11	3.70382e-11	3.09051e-12	5.40161e-11	3.31802e-10	1.01703e-09	2.52945e-09	4.80425e-09
0.362805	-9.26083e-12	-3.086e-12	3.70377e-11	5.4011e-11	7.40793e-11	6.94478e-11	1.03392e-10	1.21918e-10	1.75939e-10	0.362805	-7.98e-11	-9.22e-11	-8.85e-11	-4.04e-11	2.94e-11	1.61e-10	3.8e-10	7.02e-10	1.15e-09	0.362805	-6.94e-11	-6.33e-11	-6.79e-11	-8.95e-11	-4.5e-15	3.6e-10	1.31e-09	3.14e-09	5.74e-09	0.362805	-2.93e-10	-3.47e-10	-3.3e-10	-2.79e-10	-4.17e-11	4.51e-10	1.38e-09	2.75e-09	4.56e-09	0.362805	2.6233e-11	1.38884e-11	3.54972e-11	1.08002e-11	5.40149e-11	3.2718e-10	1.02628e-09	2.54179e-09	4.82122e-09
0.36381	-1.23474e-11	-1.53878e-12	3.8586e-11	4.9389e-11	7.56198e-11	6.3278e-11	8.48857e-11	1.26551e-10	1.88276e-10	0.36381	-8e-11	-9.16e-11	-8.71e-11	-4.68e-11	3.46e-11	1.61e-10	3.78e-10	6.96e-10	1.15e-09	0.36381	-7.41e-11	-6.33e-11	-7.56e-11	-8.64e-11	-1.08e-11	3.64e-10	1.31e-09	3.13e-09	5.75e-09	0.36381	-2.81e-10	-3.63e-10	-3.4e-10	-2.86e-10	-4.78e-11	4.57e-10	1.37e-09	2.76e-09	4.55e-09	0.36381	1.69812e-11	1.08047e-11	3.8581e-11	1.08041e-11	5.40138e-11	3.33346e-10	1.03554e-09	2.55567e-09	4.83357e-09
0.364815	-1.852e-11	1.23401e-11	5.09244e-11	5.55571e-11	7.40759e-11	6.63601e-11	8.02536e-11	1.37351e-10	1.86738e-10	0.364815	-7.68e-11	-9.59e-11	-8.74e-11	-4.86e-11	2.66e-11	1.65e-10	3.79e-10	7.04e-10	1.13e-09	0.364815	-7.56e-11	-6.64e-11	-6.79e-11	-8.95e-11	-6.18e-12	3.53e-10	1.32e-09	3.12e-09	5.77e-09	0.364815	-2.79e-10	-3.69e-10	-3.43e-10	-2.76e-10	-4.78e-11	4.66e-10	1.37e-09	2.75e-09	4.55e-09	0.364815	2.16043e-11	1.23451e-11	3.85793e-11	1.38918e-11	5.09278e-11	3.31806e-10	1.02629e-09	2.55722e-09	4.85517e-09
0.36582	-2.62319e-11	9.26308e-12	5.24649e-11	5.86397e-11	6.79039e-11	6.63612e-11	8.33351e-11	1.45062e-10	1.86743e-10	0.36582	-8.49e-11	-9.26e-11	-8.35e-11	-5.17e-11	2.19e-11	1.67e-10	3.83e-10	7.03e-10	1.15e-09	0.36582	-8.18e-11	-7.25e-11	-6.33e-11	-8.95e-11	-2.01e-11	3.52e-10	1.32e-09	3.13e-09	5.77e-09	0.36582	-2.86e-10	-3.52e-10	-3.43e-10	-2.72e-10	-5.09e-11	4.75e-10	1.37e-09	2.77e-09	4.54e-09	0.36582	2.1602e-11	1.08007e-11	3.08645e-11	2.31504e-11	4.62996e-11	3.31806e-10	1.03709e-09	2.56339e-09	4.87369e-09
0.366825	-2.31498e-11	1.54311e-11	3.55028e-11	4.78435e-11	6.01886e-11	6.63584e-11	8.02513e-11	1.34276e-10	2.0216e-10	0.366825	-8.24e-11	-9e-11	-8.21e-11	-5.76e-11	2.69e-11	1.59e-10	3.87e-10	7e-10	1.15e-09	0.366825	-8.33e-11	-7.41e-11	-5.09e-11	-8.95e-11	-9.27e-12	3.41e-10	1.33e-09	3.14e-09	5.75e-09	0.366825	-2.89e-10	-3.58e-10	-3.35e-10	-2.62e-10	-5.71e-11	4.69e-10	1.35e-09	2.77e-09	4.54e-09	0.366825	1.08086e-11	3.09445e-12	2.00655e-11	3.54888e-11	4.47575e-11	3.33346e-10	1.04634e-09	2.55877e-09	4.90146e-09
0.36783	-2.16093e-11	1.69778e-11	3.85776e-11	4.16692e-11	5.40144e-11	5.86493e-11	7.87103e-11	1.52776e-10	1.89832e-10	0.36783	-8.01e-11	-1.01e-10	-8.19e-11	-5.14e-11	2.61e-11	1.57e-10	3.81e-10	7.04e-10	1.15e-09	0.36783	-9.41e-11	-8.95e-11	-6.48e-11	-8.03e-11	-1.7e-11	3.46e-10	1.33e-09	3.12e-09	5.74e-09	0.36783	-2.93e-10	-3.5e-10	-3.53e-10	-2.67e-10	-5.25e-11	4.75e-10	1.37e-09	2.76e-09	4.55e-09	0.36783	1.54283e-11	1.69705e-11	1.69806e-11	2.93269e-11	4.93856e-11	3.25636e-10	1.04172e-09	2.57265e-09	4.91073e-09
0.368835	-2.93162e-11	2.31487e-11	2.93258e-11	3.70366e-11	4.63008e-11	6.32786e-11	8.48812e-11	1.46619e-10	2.00627e-10	0.368835	-8.26e-11	-9.54e-11	-8.03e-11	-5.34e-11	2.89e-11	1.64e-10	3.86e-10	7.09e-10	1.15e-09	0.368835	-9.57e-11	-9.26e-11	-6.02e-11	-6.95e-11	-2.16e-11	3.43e-10	1.32e-09	3.13e-09	5.75e-09	0.368835	-2.93e-10	-3.41e-10	-3.49e-10	-2.69e-10	-5.56e-11	4.75e-10	1.38e-09	2.77e-09	4.57e-09	0.368835	7.71811e-12	1.54334e-11	2.62268e-11	3.54933e-11	5.55554e-11	3.25631e-10	1.04172e-09	2.57111e-09	4.92154e-09
0.36984	-2.00627e-11	2.77723e-11	2.93218e-11	2.62409e-11	4.47535e-11	7.8703e-11	9.25925e-11	1.58949e-10	2.12967e-10	0.36984	-7.75e-11	-8.76e-11	-7.5e-11	-4.56e-11	2.51e-11	1.6e-10	3.87e-10	7.01e-10	1.15e-09	0.36984	-8.95e-11	-8.64e-11	-6.33e-11	-6.48e-11	-1.54e-11	3.32e-10	1.33e-09	3.11e-09	5.8e-09	0.36984	-3.16e-10	-3.35e-10	-3.41e-10	-2.61e-10	-6.64e-11	4.86e-10	1.38e-09	2.76e-09	4.57e-09	0.36984	4.62591e-12	1.54351e-11	1.08086e-11	3.5495e-11	5.40177e-11	3.19462e-10	1.05252e-09	2.57111e-09	4.94468e-09
0.370845	-1.08047e-11	1.38974e-11	2.77785e-11	2.93207e-11	3.85866e-11	8.17985e-11	8.79734e-11	1.45073e-10	2.09884e-10	0.370845	-8.19e-11	-9.26e-11	-9e-11	-5e-11	3.33e-11	1.62e-10	3.79e-10	7.18e-10	1.16e-09	0.370845	-9.41e-11	-9.11e-11	-6.64e-11	-6.17e-11	-9.26e-12	3.27e-10	1.32e-09	3.13e-09	5.8e-09	0.370845	-3.19e-10	-3.23e-10	-3.52e-10	-2.58e-10	-7.87e-11	4.88e-10	1.38e-09	2.77e-09	4.58e-09	0.370845	-9.25463e-12	2.16065e-11	1.08041e-11	3.39539e-11	6.01869e-11	3.20998e-10	1.05407e-09	2.58191e-09	4.97245e-09
0.37185	-6.17539e-12	2.16037e-11	2.46914e-11	2.77797e-11	4.47535e-11	9.72195e-11	1.00311e-10	1.41985e-10	1.99088e-10	0.37185	-7.93e-11	-8.69e-11	-8.37e-11	-5.13e-11	3.09e-11	1.66e-10	3.91e-10	7.08e-10	1.15e-09	0.37185	-9.11e-11	-9.88e-11	-6.64e-11	-6.17e-11	-7.71e-12	3.3e-10	1.33e-09	3.14e-09	5.79e-09	0.37185	-3.41e-10	-3.27e-10	-3.49e-10	-2.72e-10	-6.33e-11	4.72e-10	1.38e-09	2.75e-09	4.58e-09	0.37185	-9.25801e-12	2.93184e-11	1.38884e-11	3.70382e-11	6.32757e-11	3.08665e-10	1.07103e-09	2.58191e-09	4.96629e-09
0.372855	-7.71079e-12	2.3147e-11	1.85194e-11	2.77808e-11	4.62963e-11	9.2597e-11	1.04946e-10	1.48149e-10	2.00625e-10	0.372855	-9.42e-11	-9.76e-11	-8.64e-11	-5.03e-11	3.22e-11	1.66e-10	3.84e-10	7.17e-10	1.16e-09	0.372855	-8.49e-11	-8.64e-11	-7.25e-11	-5.25e-11	7.71e-12	3.32e-10	1.32e-09	3.13e-09	5.81e-09	0.372855	-3.29e-10	-3.24e-10	-3.6e-10	-2.62e-10	-7.25e-11	4.85e-10	1.39e-09	2.74e-09	4.57e-09	0.372855	-4.63492e-12	2.62381e-11	1.38896e-11	3.85798e-11	6.94489e-11	3.17912e-10	1.06641e-09	2.585e-09	4.98172e-09
0.37386	6.1675e-12	1.85166e-11	1.23496e-11	3.24045e-11	4.16737e-11	8.79717e-11	1.17282e-10	1.37355e-10	1.97541e-10	0.37386	-7.54e-11	-8.91e-11	-8.26e-11	-4.75e-11	2.68e-11	1.57e-10	3.77e-10	7.11e-10	1.15e-09	0.37386	-7.56e-11	-8.95e-11	-8.33e-11	-5.71e-11	3.09e-12	3.27e-10	1.3e-09	3.13e-09	5.82e-09	0.37386	-3.53e-10	-3.29e-10	-3.73e-10	-2.67e-10	-6.94e-11	4.88e-10	1.4e-09	2.73e-09	4.59e-09	0.37386	-1.38822e-11	2.9323e-11	1.38929e-11	3.39494e-11	7.87018e-11	3.14833e-10	1.07258e-09	2.58501e-09	4.9987e-09
0.374865	4.63041e-12	6.17539e-12	1.54266e-11	2.46982e-11	5.09289e-11	9.56813e-11	1.08035e-10	1.34263e-10	1.9754e-10	0.374865	-8.95e-11	-1.01e-10	-8.07e-11	-5.22e-11	2.71e-11	1.7e-10	3.81e-10	7.15e-10	1.15e-09	0.374865	-6.17e-11	-7.56e-11	-8.49e-11	-6.02e-11	1.39e-11	3.4e-10	1.3e-09	3.15e-09	5.81e-09	0.374865	-3.55e-10	-3.4e-10	-3.64e-10	-2.84e-10	-5.71e-11	4.83e-10	1.4e-09	2.75e-09	4.57e-09	0.374865	-3.08938e-12	3.39472e-11	2.31464e-11	2.16093e-11	7.25383e-11	3.20996e-10	1.07567e-09	2.60506e-09	5.01875e-09
0.37587	4.6321e-12	0	1.5506e-12	3.24056e-11	6.17274e-11	9.72235e-11	1.12661e-10	1.2501e-10	1.97537e-10	0.37587	-7.67e-11	-9.69e-11	-8.59e-11	-5.35e-11	3.19e-11	1.63e-10	3.75e-10	7.16e-10	1.16e-09	0.37587	-6.94e-11	-7.41e-11	-8.8e-11	-7.41e-11	1.23e-11	3.43e-10	1.31e-09	3.15e-09	5.79e-09	0.37587	-3.27e-10	-3.27e-10	-3.61e-10	-2.99e-10	-5.25e-11	4.72e-10	1.4e-09	2.75e-09	4.57e-09	0.37587	5.63029e-16	2.46976e-11	2.46903e-11	1.852e-11	7.71597e-11	3.07124e-10	1.07567e-09	2.61587e-09	5.01876e-09
0.376875	1.08013e-11	-6.16694e-12	7.71698e-12	3.08702e-11	6.17353e-11	8.95121e-11	1.2191e-10	1.26548e-10	1.88283e-10	0.376875	-8.09e-11	-9.04e-11	-8.56e-11	-5.95e-11	3.61e-11	1.61e-10	3.76e-10	7.11e-10	1.16e-09	0.376875	-6.94e-11	-7.72e-11	-9.41e-11	-7.25e-11	1.23e-11	3.46e-10	1.31e-09	3.17e-09	5.8e-09	0.376875	-3.41e-10	-3.24e-10	-3.66e-10	-2.93e-10	-5.09e-11	4.63e-10	1.4e-09	2.74e-09	4.58e-09	0.376875	4.63379e-12	2.9319e-11	2.00706e-11	1.69772e-11	6.94517e-11	3.21001e-10	1.08184e-09	2.63747e-09	5.02031e-09
0.37788	1.2344e-11	4.6214e-12	1.54278e-11	4.16675e-11	7.25298e-11	8.6425e-11	1.06496e-10	1.25005e-10	1.85193e-10	0.37788	-7.58e-11	-9.34e-11	-8.58e-11	-4.54e-11	2.48e-11	1.59e-10	3.83e-10	7.14e-10	1.16e-09	0.37788	-5.87e-11	-6.94e-11	-9.41e-11	-8.03e-11	1.54e-11	3.58e-10	1.3e-09	3.16e-09	5.82e-09	0.37788	-3.36e-10	-3.3e-10	-3.58e-10	-3.19e-10	-4.48e-11	4.55e-10	1.39e-09	2.75e-09	4.57e-09	0.37788	2.00571e-11	2.46959e-11	3.70326e-11	1.85166e-11	7.25321e-11	3.28718e-10	1.07875e-09	2.6421e-09	5.03727e-09
0.378885	7.71473e-12	-7.7136e-12	9.26758e-12	4.93845e-11	7.09922e-11	8.64211e-11	1.15741e-10	1.21923e-10	1.80566e-10	0.378885	-8.56e-11	-9.63e-11	-7.83e-11	-4.36e-11	2.05e-11	1.59e-10	3.79e-10	7.06e-10	1.16e-09	0.378885	-6.48e-11	-6.02e-11	-9.88e-11	-8.8e-11	1.23e-11	3.58e-10	1.31e-09	3.15e-09	5.83e-09	0.378885	-3.23e-10	-3.33e-10	-3.44e-10	-3.04e-10	-4.01e-11	4.43e-10	1.39e-09	2.75e-09	4.57e-09	0.378885	2.00621e-11	2.93151e-11	3.70399e-11	1.23463e-11	6.94472e-11	3.31806e-10	1.07413e-09	2.65291e-09	5.03111e-09
0.37989	-1.53822e-12	-1.23457e-11	2.46858e-11	5.55537e-11	7.25338e-11	7.87103e-11	1.09575e-10	1.2809e-10	1.80562e-10	0.37989	-8.17e-11	-9.38e-11	-8.12e-11	-4.86e-11	2.77e-11	1.64e-10	3.85e-10	7.19e-10	1.16e-09	0.37989	-6.94e-11	-6.64e-11	-8.64e-11	-8.18e-11	7.72e-12	3.53e-10	1.31e-09	3.13e-09	5.81e-09	0.37989	-3.24e-10	-3.43e-10	-3.46e-10	-2.98e-10	-4.78e-11	4.54e-10	1.38e-09	2.76e-09	4.59e-09	0.37989	1.85217e-11	1.38957e-11	4.01248e-11	6.17539e-12	6.48179e-11	3.3489e-10	1.07566e-09	2.66679e-09	5.03111e-09
0.380895	3.07981e-12	-1.54289e-11	2.16099e-11	4.9389e-11	7.25354e-11	7.87069e-11	1.08026e-10	1.26547e-10	1.74394e-10	0.380895	-8.96e-11	-9.38e-11	-8.14e-11	-4.47e-11	3.48e-11	1.6e-10	3.87e-10	7.15e-10	1.17e-09	0.380895	-6.64e-11	-5.56e-11	-9.26e-11	-9.57e-11	7.71e-12	3.56e-10	1.31e-09	3.13e-09	5.8e-09	0.380895	-3.18e-10	-3.44e-10	-3.41e-10	-3.04e-10	-3.86e-11	4.48e-10	1.38e-09	2.74e-09	4.59e-09	0.380895	2.31481e-11	1.54289e-11	4.1667e-11	6.17482e-12	6.01892e-11	3.30271e-10	1.06487e-09	2.67143e-09	5.05888e-09
0.3819	-1.07996e-11	-7.71811e-12	2.93218e-11	5.40149e-11	7.56215e-11	7.71614e-11	9.72325e-11	1.18838e-10	1.77476e-10	0.3819	-7.53e-11	-9.83e-11	-8.5e-11	-4.35e-11	2.63e-11	1.69e-10	3.9e-10	7.14e-10	1.18e-09	0.3819	-6.94e-11	-6.64e-11	-7.87e-11	-9.41e-11	-7.71e-12	3.6e-10	1.33e-09	3.14e-09	5.79e-09	0.3819	-3.1e-10	-3.46e-10	-3.32e-10	-2.92e-10	-4.01e-11	4.58e-10	1.38e-09	2.74e-09	4.59e-09	0.3819	2.46903e-11	6.17482e-12	3.85815e-11	1.08013e-11	5.86431e-11	3.47228e-10	1.07412e-09	2.68377e-09	5.08049e-09
0.382905	-1.5434e-11	-4.62816e-12	3.54899e-11	5.86403e-11	8.02462e-11	6.79067e-11	1.01848e-10	1.26547e-10	1.75941e-10	0.382905	-7.44e-11	-9.07e-11	-9.57e-11	-5.38e-11	3.57e-11	1.7e-10	3.85e-10	7.09e-10	1.15e-09	0.382905	-6.79e-11	-5.25e-11	-6.64e-11	-9.26e-11	-7.72e-12	3.55e-10	1.33e-09	3.15e-09	5.81e-09	0.382905	-3.1e-10	-3.61e-10	-3.29e-10	-2.82e-10	-4.17e-11	4.49e-10	1.37e-09	2.75e-09	4.6e-09	0.382905	2.00632e-11	1.54497e-12	3.39551e-11	1.08035e-11	5.24694e-11	3.33359e-10	1.07567e-09	2.69148e-09	5.09284e-09
0.38391	-2.31459e-11	3.08488e-12	2.62448e-11	5.09306e-11	7.25343e-11	6.4819e-11	8.33463e-11	1.28099e-10	1.92906e-10	0.38391	-7.5e-11	-8.74e-11	-8.95e-11	-5.03e-11	2.41e-11	1.65e-10	3.95e-10	7.01e-10	1.17e-09	0.38391	-7.87e-11	-6.02e-11	-6.79e-11	-1.02e-10	-1.08e-11	3.53e-10	1.32e-09	3.16e-09	5.81e-09	0.38391	-2.93e-10	-3.67e-10	-3.29e-10	-2.75e-10	-4.32e-11	4.49e-10	1.37e-09	2.76e-09	4.59e-09	0.38391	1.69778e-11	1.54497e-12	3.7036e-11	1.2348e-11	4.01316e-11	3.45688e-10	1.07721e-09	2.69457e-09	5.11907e-09
0.384915	-2.1606e-11	6.17201e-12	4.16596e-11	4.93868e-11	6.4823e-11	6.48151e-11	8.95042e-11	1.4815e-10	1.9754e-10	0.384915	-8.4e-11	-9.72e-11	-8.08e-11	-5.16e-11	1.93e-11	1.59e-10	3.86e-10	6.99e-10	1.16e-09	0.384915	-7.72e-11	-5.86e-11	-6.79e-11	-9.72e-11	-1.23e-11	3.52e-10	1.35e-09	3.17e-09	5.83e-09	0.384915	-3.04e-10	-3.69e-10	-3.29e-10	-2.73e-10	-6.02e-11	4.72e-10	1.37e-09	2.76e-09	4.6e-09	0.384915	1.85177e-11	6.17144e-12	3.24118e-11	1.85171e-11	4.47535e-11	3.36444e-10	1.08029e-09	2.68841e-09	5.13297e-09
0.38592	-2.00649e-11	6.17933e-12	3.24146e-11	5.24699e-11	7.09826e-11	5.7106e-11	7.87137e-11	1.52783e-10	2.00627e-10	0.38592	-8.1e-11	-9.59e-11	-8.19e-11	-6.19e-11	2.25e-11	1.65e-10	3.87e-10	7.04e-10	1.17e-09	0.38592	-8.18e-11	-7.1e-11	-5.86e-11	-8.33e-11	-1.08e-11	3.5e-10	1.35e-09	3.17e-09	5.83e-09	0.38592	-2.99e-10	-3.72e-10	-3.27e-10	-2.69e-10	-4.63e-11	4.58e-10	1.36e-09	2.76e-09	4.58e-09	0.38592	1.54357e-11	6.17313e-12	3.54905e-11	1.85217e-11	4.47563e-11	3.48774e-10	1.07259e-09	2.70383e-09	5.16073e-09
0.386925	-2.46931e-11	2.31402e-11	3.85765e-11	5.09255e-11	5.40206e-11	6.17313e-11	8.48767e-11	1.51246e-10	2.05257e-10	0.386925	-8.59e-11	-9.81e-11	-9.28e-11	-5.36e-11	2.58e-11	1.64e-10	3.79e-10	7.12e-10	1.18e-09	0.386925	-8.8e-11	-8.02e-11	-5.71e-11	-8.49e-11	-1.23e-11	3.29e-10	1.33e-09	3.17e-09	5.85e-09	0.386925	-3.1e-10	-3.53e-10	-3.35e-10	-2.65e-10	-6.33e-11	4.74e-10	1.36e-09	2.76e-09	4.58e-09	0.386925	2.00571e-11	6.17482e-12	2.46942e-11	2.46925e-11	4.78407e-11	3.37984e-10	1.08339e-09	2.71001e-09	5.17308e-09
0.38793	-3.0864e-11	1.54385e-11	2.93269e-11	4.16709e-11	5.24688e-11	6.63629e-11	8.02541e-11	1.60496e-10	2.09886e-10	0.38793	-7.57e-11	-9.18e-11	-8.63e-11	-5.35e-11	3.1e-11	1.62e-10	3.87e-10	7.24e-10	1.17e-09	0.38793	-8.95e-11	-7.25e-11	-6.02e-11	-7.56e-11	-2.01e-11	3.33e-10	1.33e-09	3.18e-09	5.89e-09	0.38793	-3.09e-10	-3.5e-10	-3.32e-10	-2.65e-10	-5.56e-11	4.71e-10	1.36e-09	2.76e-09	4.55e-09	0.38793	9.25914e-12	1.08064e-11	1.85205e-11	3.08634e-11	4.7844e-11	3.41063e-10	1.09418e-09	2.7208e-09	5.18081e-09
0.388935	-3.24045e-11	2.31442e-11	3.24067e-11	3.85793e-11	4.32181e-11	7.56158e-11	8.48845e-11	1.54331e-10	2.12971e-10	0.388935	-8.26e-11	-9.01e-11	-8.47e-11	-5.24e-11	3.2e-11	1.63e-10	3.91e-10	7.18e-10	1.17e-09	0.388935	-1e-10	-8.02e-11	-6.17e-11	-6.95e-11	-2.16e-11	3.46e-10	1.33e-09	3.19e-09	5.9e-09	0.388935	-3.18e-10	-3.53e-10	-3.3e-10	-2.62e-10	-7.1e-11	4.8e-10	1.37e-09	2.75e-09	4.59e-09	0.388935	-3.08206e-12	2.46858e-11	1.5434e-11	3.08662e-11	5.40115e-11	3.37978e-10	1.09265e-09	2.71618e-09	5.19933e-09
0.38994	-2.16088e-11	1.69829e-11	2.93218e-11	2.77847e-11	5.09199e-11	7.09961e-11	1.00308e-10	1.55871e-10	2.11432e-10	0.38994	-7.72e-11	-7.97e-11	-8.54e-11	-5.38e-11	2.19e-11	1.62e-10	3.9e-10	7.13e-10	1.18e-09	0.38994	-9.72e-11	-8.33e-11	-6.33e-11	-7.1e-11	-1.7e-11	3.3e-10	1.34e-09	3.18e-09	5.91e-09	0.38994	-3.21e-10	-3.58e-10	-3.35e-10	-2.69e-10	-7.56e-11	4.75e-10	1.36e-09	2.75e-09	4.59e-09	0.38994	-3.08995e-12	2.00644e-11	1.54317e-11	3.24095e-11	5.09345e-11	3.31809e-10	1.09419e-09	2.72389e-09	5.22864e-09
0.390945	-1.852e-11	2.93162e-11	2.46948e-11	3.24022e-11	3.55073e-11	8.02513e-11	1.00313e-10	1.54327e-10	2.16055e-10	0.390945	-7.55e-11	-8.65e-11	-8.86e-11	-5.64e-11	2.55e-11	1.72e-10	3.9e-10	7.14e-10	1.16e-09	0.390945	-8.95e-11	-9.72e-11	-6.48e-11	-6.79e-11	-6.17e-12	3.29e-10	1.34e-09	3.19e-09	5.92e-09	0.390945	-3.19e-10	-3.29e-10	-3.46e-10	-2.67e-10	-8.18e-11	4.88e-10	1.39e-09	2.76e-09	4.6e-09	0.390945	-1.23412e-11	2.00678e-11	1.23429e-11	3.54921e-11	6.48128e-11	3.33348e-10	1.10807e-09	2.72852e-09	5.23482e-09
0.39195	-1.69705e-11	2.46954e-11	2.62313e-11	1.85284e-11	5.24638e-11	9.10503e-11	9.87741e-11	1.48159e-10	2.08348e-10	0.39195	-7.89e-11	-8.69e-11	-8.37e-11	-5.63e-11	3.54e-11	1.67e-10	3.84e-10	7.16e-10	1.17e-09	0.39195	-8.8e-11	-8.18e-11	-7.1e-11	-5.71e-11	-3.94e-15	3.35e-10	1.33e-09	3.19e-09	5.95e-09	0.39195	-3.38e-10	-3.27e-10	-3.47e-10	-2.7e-10	-7.72e-11	4.71e-10	1.38e-09	2.75e-09	4.6e-09	0.39195	-7.71585e-12	3.3946e-11	8.44543e-15	2.93252e-11	6.48207e-11	3.30261e-10	1.10962e-09	2.73161e-09	5.24099e-09
0.392955	-2.81514e-15	2.77746e-11	1.54368e-11	2.93173e-11	4.78401e-11	9.25931e-11	1.08026e-10	1.51234e-10	2.12969e-10	0.392955	-7.72e-11	-9.43e-11	-8.36e-11	-5.11e-11	3.5e-11	1.6e-10	3.79e-10	7.2e-10	1.18e-09	0.392955	-9.1e-11	-8.49e-11	-6.95e-11	-5.71e-11	-4.62e-12	3.33e-10	1.33e-09	3.17e-09	5.95e-09	0.392955	-3.4e-10	-3.24e-10	-3.55e-10	-2.81e-10	-6.95e-11	4.66e-10	1.39e-09	2.74e-09	4.58e-09	0.392955	-1.54779e-12	3.08679e-11	1.07974e-11	3.08629e-11	7.25332e-11	3.22547e-10	1.10962e-09	2.73316e-09	5.25488e-09
0.39396	9.25069e-12	1.85171e-11	1.54317e-11	2.62409e-11	3.85905e-11	8.33435e-11	1.08028e-10	1.32729e-10	2.06799e-10	0.39396	-7.57e-11	-9.43e-11	-7.89e-11	-6.07e-11	4e-11	1.66e-10	3.86e-10	7.16e-10	1.17e-09	0.39396	-6.95e-11	-8.64e-11	-7.87e-11	-6.64e-11	1.08e-11	3.27e-10	1.34e-09	3.18e-09	5.96e-09	0.39396	-3.56e-10	-3.24e-10	-3.56e-10	-2.82e-10	-6.79e-11	4.68e-10	1.37e-09	2.75e-09	4.61e-09	0.39396	-7.7091e-12	3.39505e-11	6.18158e-12	2.46948e-11	7.71591e-11	3.17919e-10	1.1158e-09	2.75784e-09	5.27031e-09
0.394965	-6.163e-12	3.0922e-12	1.23474e-11	3.7032e-11	5.2466e-11	9.10526e-11	1.01863e-10	1.3272e-10	1.97543e-10	0.394965	-8.2e-11	-9.47e-11	-8.18e-11	-5.18e-11	3.4e-11	1.65e-10	3.89e-10	7.32e-10	1.17e-09	0.394965	-7.1e-11	-6.79e-11	-8.64e-11	-6.64e-11	7.72e-12	3.46e-10	1.33e-09	3.16e-09	5.95e-09	0.394965	-3.36e-10	-3.24e-10	-3.6e-10	-2.89e-10	-4.94e-11	4.74e-10	1.39e-09	2.75e-09	4.59e-09	0.394965	6.16807e-12	3.24112e-11	2.46847e-11	2.46886e-11	6.79129e-11	3.21005e-10	1.12659e-09	2.76402e-09	5.2734e-09
0.39597	6.17032e-12	3.08094e-12	1.23446e-11	2.93291e-11	5.09323e-11	9.5678e-11	1.12657e-10	1.26551e-10	1.95996e-10	0.39597	-7.55e-11	-9.81e-11	-7.66e-11	-5.08e-11	3.25e-11	1.75e-10	3.81e-10	7.21e-10	1.17e-09	0.39597	-6.94e-11	-7.41e-11	-8.64e-11	-6.94e-11	2.16e-11	3.52e-10	1.33e-09	3.18e-09	5.94e-09	0.39597	-3.43e-10	-3.3e-10	-3.66e-10	-2.99e-10	-5.56e-11	4.61e-10	1.39e-09	2.74e-09	4.59e-09	0.39597	6.1737e-12	3.70337e-11	2.16127e-11	1.38929e-11	8.17861e-11	3.3026e-10	1.12351e-09	2.76866e-09	5.27494e-09
0.396975	1.0799e-11	-1.23406e-11	7.7198e-12	4.01226e-11	6.01875e-11	8.48868e-11	1.15742e-10	1.25007e-10	1.9291e-10	0.396975	-7.65e-11	-9.99e-11	-8.13e-11	-5.89e-11	2.32e-11	1.6e-10	3.77e-10	7.24e-10	1.18e-09	0.396975	-6.64e-11	-7.1e-11	-9.26e-11	-6.48e-11	1.39e-11	3.56e-10	1.32e-09	3.17e-09	5.93e-09	0.396975	-3.38e-10	-3.29e-10	-3.58e-10	-2.96e-10	-4.63e-11	4.6e-10	1.39e-09	2.75e-09	4.58e-09	0.396975	7.71698e-12	2.77853e-11	3.70315e-11	1.23474e-11	7.4077e-11	3.3335e-10	1.13122e-09	2.79025e-09	5.27032e-09
0.39798	4.63154e-12	-1.23451e-11	1.23457e-11	4.32108e-11	6.78988e-11	9.10475e-11	1.08036e-10	1.25005e-10	1.89823e-10	0.39798	-7.59e-11	-8.99e-11	-7.84e-11	-4.54e-11	2.75e-11	1.68e-10	3.79e-10	7.29e-10	1.18e-09	0.39798	-5.86e-11	-6.94e-11	-1.02e-10	-8.33e-11	1.08e-11	3.57e-10	1.32e-09	3.18e-09	5.96e-09	0.39798	-3.44e-10	-3.43e-10	-3.46e-10	-3.04e-10	-4.48e-11	4.49e-10	1.4e-09	2.75e-09	4.57e-09	0.39798	1.08058e-11	3.54888e-11	3.24129e-11	1.38867e-11	6.48224e-11	3.37979e-10	1.12659e-09	2.78255e-09	5.28266e-09
0.398985	3.08319e-12	-9.26195e-12	1.54362e-11	4.32108e-11	6.01971e-11	8.02575e-11	1.17285e-10	1.21923e-10	1.85194e-10	0.398985	-7.51e-11	-8.85e-11	-8.9e-11	-5e-11	2.82e-11	1.63e-10	3.89e-10	7.2e-10	1.19e-09	0.398985	-5.86e-11	-6.17e-11	-9.26e-11	-8.03e-11	9.26e-12	3.63e-10	1.33e-09	3.18e-09	5.94e-09	0.398985	-3.35e-10	-3.41e-10	-3.49e-10	-3.04e-10	-3.7e-11	4.57e-10	1.4e-09	2.75e-09	4.57e-09	0.398985	2.16026e-11	2.46954e-11	3.8577e-11	7.71529e-12	6.79022e-11	3.42608e-10	1.1158e-09	2.79951e-09	5.28729e-09
0.39999	-7.70966e-12	-1.23457e-11	2.77752e-11	4.01304e-11	7.71557e-11	8.79598e-11	1.14201e-10	1.2809e-10	1.80564e-10	0.39999	-8.03e-11	-8.48e-11	-7.87e-11	-5.49e-11	3.08e-11	1.59e-10	3.96e-10	7.31e-10	1.18e-09	0.39999	-5.86e-11	-6.17e-11	-9.11e-11	-8.18e-11	6.17e-12	3.69e-10	1.33e-09	3.16e-09	5.93e-09	0.39999	-3.15e-10	-3.53e-10	-3.55e-10	-3.16e-10	-3.55e-11	4.46e-10	1.39e-09	2.76e-09	4.58e-09	0.39999	2.31453e-11	2.16043e-11	3.08702e-11	-1.53765e-12	6.48157e-11	3.44157e-10	1.12814e-09	2.80569e-09	5.29501e-09
0.400995	-6.19332e-15	-1.38884e-11	2.93224e-11	5.09239e-11	7.09961e-11	7.56282e-11	1.04946e-10	1.2809e-10	1.7594e-10	0.400995	-7.44e-11	-1.02e-10	-8.45e-11	-4.45e-11	2.44e-11	1.72e-10	3.9e-10	7.14e-10	1.19e-09	0.400995	-5.25e-11	-5.4e-11	-8.64e-11	-9.26e-11	6.17e-12	3.63e-10	1.34e-09	3.17e-09	5.94e-09	0.400995	-3.09e-10	-3.46e-10	-3.5e-10	-2.95e-10	-4.63e-11	4.51e-10	1.4e-09	2.78e-09	4.58e-09	0.400995	1.38952e-11	1.38957e-11	3.54955e-11	4.62704e-12	5.55599e-11	3.58036e-10	1.13893e-09	2.81803e-09	5.3089e-09
0.402	-9.25745e-12	-1.23423e-11	3.08662e-11	4.93901e-11	7.87018e-11	8.333e-11	1.03396e-10	1.21922e-10	1.86732e-10	0.402	-7.72e-11	-9.8e-11	-7.67e-11	-5.99e-11	3.16e-11	1.7e-10	3.9e-10	7.19e-10	1.18e-09	0.402	-6.64e-11	-6.33e-11	-8.33e-11	-8.64e-11	1.54e-12	3.63e-10	1.34e-09	3.16e-09	5.95e-09	0.402	-3.12e-10	-3.52e-10	-3.44e-10	-2.93e-10	-4.78e-11	4.46e-10	1.38e-09	2.77e-09	4.56e-09	0.402	2.0061e-11	2.31436e-11	4.01226e-11	3.09051e-12	5.09306e-11	3.56501e-10	1.1266e-09	2.81958e-09	5.33049e-09
0.403005	-1.23525e-11	-5.63029e-15	3.39511e-11	6.17257e-11	7.0995e-11	7.09922e-11	9.10577e-11	1.23468e-10	1.8211e-10	0.403005	-7.57e-11	-1.02e-10	-8.89e-11	-5.12e-11	2.88e-11	1.7e-10	3.96e-10	7.15e-10	1.2e-09	0.403005	-6.94e-11	-5.86e-11	-6.48e-11	-8.8e-11	-9.26e-12	3.57e-10	1.34e-09	3.18e-09	5.94e-09	0.403005	-2.9e-10	-3.57e-10	-3.21e-10	-2.95e-10	-4.01e-11	4.52e-10	1.38e-09	2.77e-09	4.59e-09	0.403005	2.16077e-11	1.69739e-11	3.70377e-11	1.23406e-11	5.2466e-11	3.62667e-10	1.11889e-09	2.82421e-09	5.33359e-09
0.40401	-3.23999e-11	-3.08263e-12	3.39539e-11	5.86431e-11	7.40742e-11	6.17336e-11	8.95138e-11	1.38892e-10	1.83655e-10	0.40401	-7.89e-11	-8.93e-11	-7.96e-11	-5.36e-11	3.57e-11	1.71e-10	3.93e-10	7.16e-10	1.19e-09	0.40401	-7.72e-11	-6.48e-11	-6.48e-11	-9.72e-11	-1.7e-11	3.7e-10	1.36e-09	3.18e-09	5.96e-09	0.40401	-2.98e-10	-3.66e-10	-3.23e-10	-2.79e-10	-4.01e-11	4.54e-10	1.37e-09	2.77e-09	4.59e-09	0.40401	2.77729e-11	4.6321e-12	3.08702e-11	6.17989e-12	3.85872e-11	3.54957e-10	1.1266e-09	2.83809e-09	5.35519e-09
0.405015	-2.77808e-11	4.62872e-12	3.85821e-11	5.09289e-11	6.79039e-11	5.86465e-11	9.72162e-11	1.45067e-10	1.95994e-10	0.405015	-7.69e-11	-9.93e-11	-7.99e-11	-5.3e-11	2.61e-11	1.59e-10	3.91e-10	7.24e-10	1.18e-09	0.405015	-8.33e-11	-6.48e-11	-6.48e-11	-8.95e-11	-2.01e-11	3.61e-10	1.38e-09	3.21e-09	5.95e-09	0.405015	-3.06e-10	-3.58e-10	-3.24e-10	-2.78e-10	-4.63e-11	4.65e-10	1.37e-09	2.79e-09	4.61e-09	0.405015	1.69789e-11	-1.53878e-12	3.70292e-11	1.85166e-11	3.85849e-11	3.53412e-10	1.12968e-09	2.83347e-09	5.3552e-09
0.40602	-2.77774e-11	9.26195e-12	4.32086e-11	4.47569e-11	6.01892e-11	6.01903e-11	7.56327e-11	1.46611e-10	2.00626e-10	0.40602	-7.12e-11	-9.85e-11	-7.78e-11	-5.39e-11	2.75e-11	1.64e-10	3.88e-10	7.24e-10	1.19e-09	0.40602	-8.8e-11	-6.95e-11	-6.48e-11	-8.64e-11	-2.16e-11	3.61e-10	1.36e-09	3.2e-09	5.95e-09	0.40602	-3.04e-10	-3.63e-10	-3.29e-10	-2.59e-10	-4.79e-11	4.75e-10	1.36e-09	2.78e-09	4.6e-09	0.40602	1.38918e-11	4.62816e-12	1.69846e-11	2.31493e-11	4.62957e-11	3.51868e-10	1.13585e-09	2.84582e-09	5.3768e-09
0.407025	-2.31526e-11	2.00587e-11	3.85821e-11	4.32136e-11	5.55599e-11	6.78977e-11	8.64216e-11	1.45072e-10	2.03715e-10	0.407025	-8.11e-11	-9.54e-11	-7.96e-11	-5.79e-11	2.45e-11	1.64e-10	3.9e-10	7.38e-10	1.18e-09	0.407025	-8.8e-11	-8.95e-11	-6.79e-11	-8.64e-11	-2.31e-11	3.63e-10	1.37e-09	3.22e-09	5.93e-09	0.407025	-3.07e-10	-3.64e-10	-3.29e-10	-2.65e-10	-7.41e-11	4.69e-10	1.36e-09	2.79e-09	4.6e-09	0.407025	1.69699e-11	6.17539e-12	2.00599e-11	2.77769e-11	4.62974e-11	3.48781e-10	1.13586e-09	2.86278e-09	5.39378e-09
0.40803	-2.7778e-11	2.00661e-11	3.39539e-11	4.6294e-11	5.55593e-11	5.71116e-11	9.10492e-11	1.52783e-10	2.09884e-10	0.40803	-8.59e-11	-9.86e-11	-8.85e-11	-5.58e-11	2.35e-11	1.7e-10	3.9e-10	7.21e-10	1.19e-09	0.40803	-9.57e-11	-8.33e-11	-6.02e-11	-7.1e-11	-1.24e-11	3.56e-10	1.36e-09	3.22e-09	5.96e-09	0.40803	-3.21e-10	-3.43e-10	-3.36e-10	-2.55e-10	-6.17e-11	4.71e-10	1.37e-09	2.78e-09	4.61e-09	0.40803	3.09051e-12	1.38879e-11	1.54323e-11	2.62392e-11	4.32181e-11	3.42614e-10	1.13431e-09	2.86125e-09	5.42155e-09
0.409035	-2.93162e-11	2.93128e-11	3.39517e-11	3.70382e-11	5.86397e-11	7.40754e-11	8.33429e-11	1.5587e-10	2.09886e-10	0.409035	-8.16e-11	-9.01e-11	-8.39e-11	-5.15e-11	2.46e-11	1.64e-10	3.89e-10	7.31e-10	1.18e-09	0.409035	-9.41e-11	-9.11e-11	-5.86e-11	-5.56e-11	-1.7e-11	3.46e-10	1.36e-09	3.22e-09	5.94e-09	0.409035	-3.19e-10	-3.41e-10	-3.47e-10	-2.64e-10	-7.87e-11	4.8e-10	1.37e-09	2.78e-09	4.62e-09	0.409035	0	1.69733e-11	9.26364e-12	3.39505e-11	5.70936e-11	3.50317e-10	1.13586e-09	2.86279e-09	5.42465e-09
0.41004	-1.38946e-11	1.23542e-11	3.24039e-11	2.62409e-11	4.78418e-11	8.48722e-11	9.10509e-11	1.54327e-10	2.08342e-10	0.41004	-8.37e-11	-9.17e-11	-8.01e-11	-5.13e-11	3.42e-11	1.65e-10	3.91e-10	7.29e-10	1.19e-09	0.41004	-9.26e-11	-9.41e-11	-6.79e-11	-6.79e-11	-1.08e-11	3.43e-10	1.37e-09	3.23e-09	5.96e-09	0.41004	-3.15e-10	-3.36e-10	-3.55e-10	-2.72e-10	-7.25e-11	4.82e-10	1.37e-09	2.78e-09	4.62e-09	0.41004	-3.08544e-12	1.23513e-11	1.38879e-11	3.70399e-11	4.93924e-11	3.34899e-10	1.15437e-09	2.85508e-09	5.44778e-09
0.411045	-1.23457e-11	1.69722e-11	1.69795e-11	2.9319e-11	3.70433e-11	7.25456e-11	9.10599e-11	1.48154e-10	2.02175e-10	0.411045	-7.73e-11	-9.36e-11	-8.5e-11	-6.02e-11	4.19e-11	1.71e-10	3.85e-10	7.35e-10	1.2e-09	0.411045	-9.26e-11	-1e-10	-7.25e-11	-6.02e-11	-6.17e-12	3.32e-10	1.38e-09	3.23e-09	5.97e-09	0.411045	-3.09e-10	-3.15e-10	-3.64e-10	-2.67e-10	-7.1e-11	4.77e-10	1.39e-09	2.77e-09	4.63e-09	0.411045	-3.08826e-12	2.16054e-11	1.38884e-11	4.32069e-11	6.17302e-11	3.37975e-10	1.15438e-09	2.86742e-09	5.44779e-09
0.41205	-9.25745e-12	1.08075e-11	1.08064e-11	2.31515e-11	3.85815e-11	9.10442e-11	1.08023e-10	1.37357e-10	2.09883e-10	0.41205	-8.08e-11	-9.39e-11	-8.47e-11	-5.26e-11	2.7e-11	1.69e-10	3.83e-10	7.34e-10	1.2e-09	0.41205	-8.33e-11	-8.64e-11	-5.87e-11	-6.94e-11	4.63e-12	3.33e-10	1.37e-09	3.2e-09	5.97e-09	0.41205	-3.23e-10	-3.21e-10	-3.58e-10	-2.79e-10	-7.1e-11	4.72e-10	1.4e-09	2.78e-09	4.65e-09	0.41205	-7.71417e-12	2.93168e-11	1.08058e-11	3.5495e-11	7.09854e-11	3.30266e-10	1.15592e-09	2.86742e-09	5.45705e-09
0.413055	-5.06726e-15	1.69711e-11	1.38879e-11	2.31493e-11	3.85855e-11	8.33424e-11	1.06487e-10	1.40439e-10	2.06799e-10	0.413055	-8.23e-11	-8.6e-11	-8.66e-11	-5.07e-11	2.51e-11	1.69e-10	3.88e-10	7.32e-10	1.19e-09	0.413055	-7.72e-11	-8.64e-11	-6.95e-11	-6.33e-11	9.26e-12	3.38e-10	1.37e-09	3.21e-09	5.99e-09	0.413055	-3.29e-10	-3.09e-10	-3.64e-10	-2.7e-10	-7.1e-11	4.83e-10	1.38e-09	2.75e-09	4.64e-09	0.413055	-6.1737e-12	2.16127e-11	1.54317e-11	2.62375e-11	6.48213e-11	3.31804e-10	1.16209e-09	2.87205e-09	5.46939e-09
0.41406	-4.62366e-12	9.26308e-12	1.23418e-11	2.31538e-11	4.78395e-11	8.95133e-11	1.06488e-10	1.45061e-10	2.00628e-10	0.41406	-8.24e-11	-9.56e-11	-9.18e-11	-4.86e-11	2.73e-11	1.71e-10	3.89e-10	7.29e-10	1.21e-09	0.41406	-8.18e-11	-8.33e-11	-8.64e-11	-6.64e-11	7.72e-12	3.44e-10	1.37e-09	3.17e-09	5.99e-09	0.41406	-3.43e-10	-3.19e-10	-3.61e-10	-2.82e-10	-7.1e-11	4.72e-10	1.39e-09	2.74e-09	4.61e-09	0.41406	-6.16976e-12	3.24056e-11	1.69784e-11	2.16082e-11	6.79056e-11	3.27178e-10	1.17289e-09	2.88131e-09	5.47094e-09
0.415065	7.71304e-12	1.0799e-11	-1.53371e-12	3.54899e-11	5.09295e-11	1.03394e-10	1.11118e-10	1.29641e-10	1.97538e-10	0.415065	-8.44e-11	-9.88e-11	-8.27e-11	-5.55e-11	3.08e-11	1.6e-10	3.9e-10	7.32e-10	1.19e-09	0.415065	-6.48e-11	-7.72e-11	-8.95e-11	-6.17e-11	9.26e-12	3.49e-10	1.36e-09	3.19e-09	6.01e-09	0.415065	-3.35e-10	-3.12e-10	-3.63e-10	-2.93e-10	-6.79e-11	4.72e-10	1.4e-09	2.76e-09	4.62e-09	0.415065	3.08263e-12	3.395e-11	2.4688e-11	2.31453e-11	7.40748e-11	3.28722e-10	1.17598e-09	2.89211e-09	5.47403e-09
0.41607	1.08013e-11	1.54497e-12	1.07979e-11	3.2414e-11	5.71037e-11	1.0031e-10	1.18829e-10	1.28092e-10	1.88282e-10	0.41607	-8.43e-11	-9.74e-11	-8.52e-11	-5.44e-11	2.49e-11	1.72e-10	3.87e-10	7.3e-10	1.2e-09	0.41607	-6.94e-11	-7.1e-11	-8.95e-11	-6.48e-11	-1.53e-12	3.53e-10	1.36e-09	3.23e-09	6.01e-09	0.41607	-3.36e-10	-3.3e-10	-3.53e-10	-2.89e-10	-5.71e-11	4.66e-10	1.41e-09	2.77e-09	4.61e-09	0.41607	1.54554e-12	2.93246e-11	2.00683e-11	1.38867e-11	7.25332e-11	3.37975e-10	1.17598e-09	2.90137e-09	5.49562e-09
0.417075	9.26083e-12	-3.08375e-12	9.2642e-12	4.32074e-11	6.94404e-11	8.79728e-11	1.15743e-10	1.25005e-10	1.83652e-10	0.417075	-8.24e-11	-9.9e-11	-8.07e-11	-5.95e-11	2.79e-11	1.74e-10	3.88e-10	7.33e-10	1.2e-09	0.417075	-6.17e-11	-7.1e-11	-8.33e-11	-6.95e-11	1.23e-11	3.61e-10	1.34e-09	3.22e-09	6.01e-09	0.417075	-3.38e-10	-3.32e-10	-3.69e-10	-2.98e-10	-4.63e-11	4.6e-10	1.41e-09	2.75e-09	4.6e-09	0.417075	6.17482e-12	3.08629e-11	3.08634e-11	-3.07756e-12	6.79056e-11	3.36437e-10	1.17752e-09	2.91371e-09	5.49255e-09
0.41808	1.08002e-11	-4.50423e-15	2.00565e-11	4.16765e-11	6.1737e-11	9.10492e-11	1.04949e-10	1.20378e-10	1.82107e-10	0.41808	-8.36e-11	-1.02e-10	-8.73e-11	-5.2e-11	2.46e-11	1.6e-10	3.91e-10	7.34e-10	1.19e-09	0.41808	-5.71e-11	-6.02e-11	-9.26e-11	-8.02e-11	1.54e-11	3.61e-10	1.36e-09	3.22e-09	6.01e-09	0.41808	-3.27e-10	-3.35e-10	-3.6e-10	-2.99e-10	-5.09e-11	4.44e-10	1.41e-09	2.75e-09	4.58e-09	0.41808	1.5434e-11	2.46914e-11	3.54933e-11	4.62478e-12	6.63612e-11	3.37984e-10	1.17444e-09	2.91218e-09	5.50026e-09
0.419085	4.62985e-12	-9.25632e-12	1.38974e-11	6.17195e-11	6.94461e-11	8.17951e-11	1.11116e-10	1.21917e-10	1.79019e-10	0.419085	-8.86e-11	-9.22e-11	-8.43e-11	-5.03e-11	2.06e-11	1.69e-10	3.92e-10	7.34e-10	1.2e-09	0.419085	-6.33e-11	-5.56e-11	-8.18e-11	-8.18e-11	3.09e-12	3.69e-10	1.36e-09	3.22e-09	5.99e-09	0.419085	-3.27e-10	-3.29e-10	-3.43e-10	-3.04e-10	-4.94e-11	4.51e-10	1.41e-09	2.75e-09	4.6e-09	0.419085	2.77735e-11	1.54373e-11	3.39579e-11	-1.54103e-12	6.48173e-11	3.53405e-10	1.18061e-09	2.93224e-09	5.50181e-09
0.42009	-1.54497e-12	-9.26026e-12	2.93168e-11	4.93924e-11	7.25304e-11	7.5626e-11	1.15742e-10	1.17293e-10	1.69766e-10	0.42009	-8.66e-11	-1.03e-10	-8.82e-11	-5.37e-11	3.26e-11	1.63e-10	4.02e-10	7.27e-10	1.21e-09	0.42009	-6.17e-11	-6.33e-11	-8.49e-11	-8.49e-11	1.55e-12	3.64e-10	1.36e-09	3.23e-09	5.99e-09	0.42009	-3.15e-10	-3.36e-10	-3.49e-10	-3.04e-10	-4.78e-11	4.52e-10	1.42e-09	2.76e-09	4.59e-09	0.42009	2.46942e-11	1.85155e-11	4.78378e-11	-1.54272e-12	6.17325e-11	3.48788e-10	1.17753e-09	2.94612e-09	5.51106e-09
0.421095	-1.23418e-11	-1.0803e-11	2.93213e-11	5.7097e-11	6.48247e-11	8.33334e-11	1.09569e-10	1.21919e-10	1.72848e-10	0.421095	-7.49e-11	-9.96e-11	-7.88e-11	-4.79e-11	2e-11	1.7e-10	3.9e-10	7.28e-10	1.2e-09	0.421095	-6.17e-11	-5.09e-11	-7.56e-11	-9.26e-11	7.71e-12	3.64e-10	1.37e-09	3.24e-09	5.97e-09	0.421095	-3.16e-10	-3.49e-10	-3.32e-10	-2.99e-10	-4.17e-11	4.35e-10	1.39e-09	2.76e-09	4.6e-09	0.421095	2.62341e-11	1.08064e-11	5.09272e-11	1.68909e-15	6.17251e-11	3.61122e-10	1.17598e-09	2.94459e-09	5.5157e-09
0.4221	-1.08041e-11	-1.2344e-11	2.62398e-11	5.24767e-11	7.56186e-11	8.02491e-11	9.10627e-11	1.26551e-10	1.75934e-10	0.4221	-8.13e-11	-9.5e-11	-8.37e-11	-4.19e-11	3.02e-11	1.7e-10	3.97e-10	7.15e-10	1.21e-09	0.4221	-6.48e-11	-5.71e-11	-8.49e-11	-9.11e-11	-3.08e-12	3.73e-10	1.37e-09	3.23e-09	5.97e-09	0.4221	-3.06e-10	-3.64e-10	-3.21e-10	-3.02e-10	-3.7e-11	4.49e-10	1.39e-09	2.76e-09	4.6e-09	0.4221	2.31532e-11	1.23451e-11	5.09233e-11	6.16976e-12	4.47642e-11	3.56502e-10	1.1729e-09	2.96001e-09	5.51879e-09
0.423105	-1.2348e-11	-7.71529e-12	3.395e-11	6.17246e-11	8.02468e-11	7.25343e-11	9.72235e-11	1.35804e-10	1.7748e-10	0.423105	-7.27e-11	-9.91e-11	-8.68e-11	-5.03e-11	2.9e-11	1.66e-10	3.99e-10	7.31e-10	1.21e-09	0.423105	-6.79e-11	-5.71e-11	-6.95e-11	-9.11e-11	-3.09e-12	3.67e-10	1.38e-09	3.23e-09	5.97e-09	0.423105	-3.18e-10	-3.64e-10	-3.24e-10	-2.89e-10	-5.09e-11	4.54e-10	1.37e-09	2.75e-09	4.59e-09	0.423105	3.08612e-11	1.08007e-11	3.70439e-11	3.08826e-12	5.24638e-11	3.61127e-10	1.17135e-09	2.96774e-09	5.54501e-09
0.42411	-1.85205e-11	1.68909e-15	3.54966e-11	5.2475e-11	7.4077e-11	6.4823e-11	9.41369e-11	1.31187e-10	1.85192e-10	0.42411	-8.38e-11	-9.14e-11	-8.52e-11	-4.81e-11	1.9e-11	1.7e-10	3.89e-10	7.3e-10	1.2e-09	0.42411	-8.02e-11	-5.4e-11	-7.1e-11	-9.88e-11	-1.85e-11	3.7e-10	1.37e-09	3.24e-09	5.96e-09	0.42411	-3.16e-10	-3.7e-10	-3.16e-10	-2.96e-10	-4.94e-11	4.68e-10	1.37e-09	2.77e-09	4.59e-09	0.42411	2.62364e-11	3.08995e-12	3.70371e-11	4.62929e-12	3.8586e-11	3.61126e-10	1.16518e-09	2.97853e-09	5.54965e-09
0.425115	-2.77752e-11	1.23435e-11	4.01248e-11	5.24694e-11	6.63606e-11	7.09843e-11	8.17968e-11	1.48146e-10	1.88283e-10	0.425115	-8.17e-11	-1.07e-10	-7.63e-11	-5.65e-11	2.49e-11	1.73e-10	3.97e-10	7.27e-10	1.21e-09	0.425115	-8.33e-11	-6.17e-11	-7.72e-11	-8.33e-11	-2.16e-11	3.6e-10	1.37e-09	3.25e-09	5.96e-09	0.425115	-2.96e-10	-3.55e-10	-3.15e-10	-2.69e-10	-5.09e-11	4.66e-10	1.36e-09	2.77e-09	4.59e-09	0.425115	2.31464e-11	4.62535e-12	3.24101e-11	4.63267e-12	3.54995e-11	3.5496e-10	1.17135e-09	2.96003e-09	5.55891e-09
0.42612	-2.62341e-11	1.69733e-11	4.32114e-11	4.62991e-11	5.71077e-11	5.86487e-11	7.7167e-11	1.40444e-10	1.99081e-10	0.42612	-7.86e-11	-9.26e-11	-7.44e-11	-5.55e-11	2.77e-11	1.73e-10	3.99e-10	7.35e-10	1.21e-09	0.42612	-8.33e-11	-6.79e-11	-6.33e-11	-7.72e-11	-2.62e-11	3.52e-10	1.37e-09	3.27e-09	5.95e-09	0.42612	-3.1e-10	-3.5e-10	-3.32e-10	-2.72e-10	-5.09e-11	4.65e-10	1.37e-09	2.77e-09	4.6e-09	0.42612	1.23502e-11	-6.16413e-12	3.08657e-11	1.23485e-11	4.32119e-11	3.61123e-10	1.17598e-09	2.97391e-09	5.5728e-09
0.427125	-2.00661e-11	1.38901e-11	4.47518e-11	4.16703e-11	6.48095e-11	5.7106e-11	8.02536e-11	1.46613e-10	2.02167e-10	0.427125	-7.9e-11	-1.05e-10	-7.78e-11	-5.9e-11	2.75e-11	1.64e-10	3.93e-10	7.27e-10	1.2e-09	0.427125	-8.64e-11	-8.64e-11	-6.17e-11	-8.33e-11	-1.39e-11	3.53e-10	1.37e-09	3.27e-09	5.96e-09	0.427125	-3.07e-10	-3.58e-10	-3.36e-10	-2.73e-10	-6.02e-11	4.71e-10	1.37e-09	2.78e-09	4.61e-09	0.427125	1.23457e-11	7.71022e-12	2.93184e-11	2.62324e-11	5.09255e-11	3.53418e-10	1.18215e-09	2.98779e-09	5.58822e-09
0.42813	-2.31476e-11	1.23508e-11	3.70366e-11	4.16647e-11	4.93901e-11	6.79005e-11	9.10475e-11	1.55868e-10	1.96005e-10	0.42813	-8.08e-11	-9.08e-11	-9.26e-11	-5.21e-11	2.63e-11	1.69e-10	3.91e-10	7.32e-10	1.21e-09	0.42813	-9.88e-11	-7.1e-11	-6.17e-11	-7.41e-11	-1.85e-11	3.55e-10	1.36e-09	3.27e-09	5.97e-09	0.42813	-2.99e-10	-3.5e-10	-3.26e-10	-2.67e-10	-7.41e-11	4.69e-10	1.38e-09	2.77e-09	4.61e-09	0.42813	1.07985e-11	4.63492e-12	1.69829e-11	3.08629e-11	5.09289e-11	3.62664e-10	1.17753e-09	2.98934e-09	5.58824e-09
0.429135	-2.16054e-11	2.31431e-11	2.31583e-11	3.08691e-11	4.78424e-11	6.79056e-11	8.4884e-11	1.55872e-10	2.11423e-10	0.429135	-7.51e-11	-9.03e-11	-8.72e-11	-6.43e-11	2.87e-11	1.71e-10	3.89e-10	7.31e-10	1.21e-09	0.429135	-9.11e-11	-9.1e-11	-6.94e-11	-6.94e-11	-1.39e-11	3.46e-10	1.37e-09	3.28e-09	5.99e-09	0.429135	-3.18e-10	-3.41e-10	-3.41e-10	-2.55e-10	-8.02e-11	4.8e-10	1.38e-09	2.78e-09	4.62e-09	0.429135	-3.07981e-12	1.543e-11	2.31408e-11	2.77853e-11	5.24728e-11	3.51871e-10	1.18678e-09	2.98626e-09	5.616e-09
0.43014	-1.85171e-11	1.69823e-11	3.3946e-11	2.93224e-11	4.78407e-11	7.09922e-11	8.79717e-11	1.55871e-10	2.06803e-10	0.43014	-7.87e-11	-9.53e-11	-8.29e-11	-4.99e-11	2.9e-11	1.66e-10	3.87e-10	7.32e-10	1.21e-09	0.43014	-9.41e-11	-9.26e-11	-6.95e-11	-5.56e-11	-1.08e-11	3.38e-10	1.36e-09	3.27e-09	6e-09	0.43014	-3.27e-10	-3.36e-10	-3.49e-10	-2.69e-10	-7.72e-11	4.75e-10	1.39e-09	2.75e-09	4.62e-09	0.43014	1.53822e-12	1.85183e-11	6.18327e-12	4.16591e-11	5.70975e-11	3.48781e-10	1.19296e-09	2.99551e-09	5.6299e-09
0.431145	-9.26364e-12	2.77707e-11	2.77791e-11	2.77814e-11	4.47569e-11	7.71647e-11	1.03395e-10	1.52786e-10	2.09883e-10	0.431145	-7.94e-11	-9.86e-11	-9.04e-11	-5.58e-11	3.53e-11	1.7e-10	3.94e-10	7.31e-10	1.21e-09	0.431145	-8.49e-11	-8.8e-11	-7.72e-11	-6.64e-11	-9.26e-12	3.32e-10	1.36e-09	3.28e-09	6e-09	0.431145	-3.26e-10	-3.16e-10	-3.46e-10	-2.7e-10	-7.72e-11	4.77e-10	1.39e-09	2.78e-09	4.62e-09	0.431145	-7.71022e-12	1.85233e-11	1.69705e-11	2.9328e-11	5.09362e-11	3.42612e-10	1.20838e-09	3.00013e-09	5.65458e-09
0.43215	-1.07968e-11	1.54373e-11	2.1606e-11	3.24011e-11	4.62968e-11	8.48812e-11	1.04942e-10	1.51241e-10	2.03718e-10	0.43215	-7.63e-11	-9.69e-11	-8.23e-11	-5.9e-11	2.8e-11	1.74e-10	3.85e-10	7.36e-10	1.21e-09	0.43215	-8.03e-11	-9.11e-11	-7.1e-11	-5.71e-11	-3.09e-12	3.33e-10	1.36e-09	3.27e-09	6.02e-09	0.43215	-3.26e-10	-3.38e-10	-3.61e-10	-2.72e-10	-8.02e-11	4.8e-10	1.38e-09	2.75e-09	4.61e-09	0.43215	-3.9412e-15	2.93213e-11	1.23491e-11	3.24073e-11	6.63561e-11	3.44149e-10	1.20685e-09	2.98164e-09	5.6623e-09
0.433155	4.62366e-12	1.54306e-11	1.54334e-11	1.54396e-11	4.32159e-11	9.41358e-11	1.03402e-10	1.48155e-10	2.09878e-10	0.433155	-7.75e-11	-9.17e-11	-7.92e-11	-5.41e-11	2.77e-11	1.74e-10	3.97e-10	7.42e-10	1.22e-09	0.433155	-8.02e-11	-9.11e-11	-8.02e-11	-6.48e-11	3.09e-12	3.43e-10	1.35e-09	3.28e-09	6.03e-09	0.433155	-3.3e-10	-3.21e-10	-3.63e-10	-2.75e-10	-7.1e-11	4.78e-10	1.4e-09	2.75e-09	4.61e-09	0.433155	-3.08375e-12	3.7032e-11	1.54306e-11	3.08651e-11	6.79039e-11	3.36441e-10	1.21765e-09	2.99397e-09	5.65923e-09
0.43416	3.086e-12	9.26364e-12	1.08019e-11	1.69795e-11	5.09233e-11	9.10588e-11	1.06484e-10	1.43525e-10	1.92916e-10	0.43416	-8.03e-11	-9.16e-11	-7.78e-11	-6.13e-11	3.61e-11	1.69e-10	3.92e-10	7.39e-10	1.21e-09	0.43416	-7.56e-11	-9.41e-11	-8.49e-11	-5.56e-11	9.26e-12	3.49e-10	1.34e-09	3.25e-09	6.03e-09	0.43416	-3.43e-10	-3.29e-10	-3.7e-10	-2.82e-10	-6.02e-11	4.75e-10	1.4e-09	2.75e-09	4.63e-09	0.43416	1.54047e-12	2.6242e-11	1.23491e-11	2.77763e-11	6.79039e-11	3.42606e-10	1.22228e-09	3.00632e-09	5.67774e-09
0.435165	5.63029e-15	1.38845e-11	3.08882e-12	2.77774e-11	4.47637e-11	1.01852e-10	1.03405e-10	1.37351e-10	1.91365e-10	0.435165	-7.15e-11	-8.87e-11	-8.24e-11	-5.59e-11	2.43e-11	1.73e-10	3.92e-10	7.47e-10	1.22e-09	0.435165	-6.02e-11	-7.56e-11	-8.95e-11	-6.64e-11	1.08e-11	3.47e-10	1.34e-09	3.26e-09	6.04e-09	0.435165	-3.6e-10	-3.24e-10	-3.61e-10	-2.81e-10	-6.48e-11	4.71e-10	1.4e-09	2.75e-09	4.62e-09	0.435165	-1.53934e-12	3.2405e-11	1.69789e-11	1.69756e-11	6.63646e-11	3.41065e-10	1.22382e-09	3.01712e-09	5.68237e-09
0.43617	1.23384e-11	4.63098e-12	1.54722e-12	3.39539e-11	6.1724e-11	1.00311e-10	1.12658e-10	1.28097e-10	1.85193e-10	0.43617	-7.47e-11	-9.35e-11	-8.05e-11	-4.95e-11	2.17e-11	1.73e-10	3.96e-10	7.42e-10	1.21e-09	0.43617	-7.41e-11	-7.41e-11	-9.26e-11	-7.1e-11	2.16e-11	3.5e-10	1.35e-09	3.26e-09	6.04e-09	0.43617	-3.36e-10	-3.3e-10	-3.7e-10	-2.87e-10	-4.94e-11	4.58e-10	1.4e-09	2.75e-09	4.62e-09	0.43617	6.17201e-12	2.77802e-11	2.93162e-11	4.63604e-12	7.40742e-11	3.36441e-10	1.2192e-09	3.02792e-09	5.68854e-09
0.437175	3.08826e-12	-1.54328e-12	1.08007e-11	4.47547e-11	5.86476e-11	9.25998e-11	1.17288e-10	1.31175e-10	1.7594e-10	0.437175	-8.35e-11	-9.63e-11	-8.53e-11	-5.24e-11	2.35e-11	1.66e-10	3.93e-10	7.42e-10	1.22e-09	0.437175	-5.4e-11	-7.41e-11	-8.8e-11	-7.56e-11	1.54e-11	3.56e-10	1.35e-09	3.26e-09	6.04e-09	0.437175	-3.55e-10	-3.35e-10	-3.7e-10	-2.98e-10	-4.63e-11	4.61e-10	1.4e-09	2.75e-09	4.62e-09	0.437175	1.08007e-11	2.62358e-11	2.46959e-11	9.25632e-12	7.25338e-11	3.45693e-10	1.22074e-09	3.03718e-09	5.68546e-09
0.43818	-1.53991e-12	-7.71191e-12	1.38879e-11	5.40121e-11	6.32718e-11	9.25936e-11	1.17288e-10	1.23464e-10	1.82101e-10	0.43818	-7.52e-11	-1.01e-10	-8.56e-11	-4.73e-11	2.5e-11	1.69e-10	3.93e-10	7.46e-10	1.22e-09	0.43818	-6.17e-11	-6.02e-11	-9.26e-11	-8.8e-11	1.08e-11	3.63e-10	1.34e-09	3.24e-09	6.03e-09	0.43818	-3.41e-10	-3.23e-10	-3.63e-10	-2.95e-10	-4.94e-11	4.55e-10	1.4e-09	2.77e-09	4.63e-09	0.43818	9.26308e-12	2.46914e-11	2.93207e-11	4.63323e-12	6.94455e-11	3.47239e-10	1.22999e-09	3.04336e-09	5.68855e-09
0.439185	3.08375e-12	-1.5461e-12	1.23496e-11	5.55571e-11	6.01943e-11	8.33407e-11	1.14202e-10	1.18839e-10	1.69767e-10	0.439185	-8.5e-11	-8.87e-11	-8.72e-11	-5.67e-11	3.03e-11	1.75e-10	3.93e-10	7.34e-10	1.22e-09	0.439185	-5.71e-11	-6.79e-11	-9.11e-11	-8.64e-11	1.54e-11	3.7e-10	1.36e-09	3.25e-09	6.03e-09	0.439185	-3.23e-10	-3.41e-10	-3.44e-10	-3.04e-10	-4.17e-11	4.61e-10	1.4e-09	2.75e-09	4.63e-09	0.439185	1.69744e-11	2.00666e-11	2.93258e-11	9.25632e-12	6.01892e-11	3.50325e-10	1.21766e-09	3.05107e-09	5.70242e-09
0.44019	-3.37817e-15	-3.08826e-12	2.00627e-11	5.40138e-11	7.40731e-11	8.33311e-11	1.09572e-10	1.31174e-10	1.7439e-10	0.44019	-7.84e-11	-8.57e-11	-8.81e-11	-5.4e-11	3.15e-11	1.74e-10	3.99e-10	7.36e-10	1.21e-09	0.44019	-6.17e-11	-5.56e-11	-8.49e-11	-7.72e-11	6.18e-12	3.72e-10	1.37e-09	3.23e-09	5.99e-09	0.44019	-3.12e-10	-3.41e-10	-3.43e-10	-3.02e-10	-3.86e-11	4.52e-10	1.39e-09	2.77e-09	4.61e-09	0.44019	2.00627e-11	2.62279e-11	3.85759e-11	4.63435e-12	5.40177e-11	3.51871e-10	1.21919e-09	3.06341e-09	5.69164e-09
0.441195	-1.23395e-11	-9.25463e-12	2.77791e-11	4.93885e-11	7.56198e-11	6.63663e-11	1.01858e-10	1.29635e-10	1.77476e-10	0.441195	-7.6e-11	-9.18e-11	-9.08e-11	-5.13e-11	2.36e-11	1.7e-10	3.93e-10	7.43e-10	1.22e-09	0.441195	-6.33e-11	-4.63e-11	-7.41e-11	-1e-10	6.17e-12	3.63e-10	1.37e-09	3.24e-09	5.97e-09	0.441195	-3.13e-10	-3.35e-10	-3.24e-10	-3.04e-10	-3.4e-11	4.48e-10	1.4e-09	2.77e-09	4.62e-09	0.441195	2.31515e-11	1.08081e-11	3.08696e-11	1.23395e-11	5.55543e-11	3.59583e-10	1.21919e-09	3.06496e-09	5.7086e-09
0.4422	-6.1782e-12	-1.54554e-12	3.54933e-11	5.40149e-11	7.4077e-11	6.32757e-11	9.87673e-11	1.26554e-10	1.77476e-10	0.4422	-8.06e-11	-9.17e-11	-8.01e-11	-5.56e-11	3.06e-11	1.71e-10	3.96e-10	7.29e-10	1.22e-09	0.4422	-6.48e-11	-4.78e-11	-7.1e-11	-9.41e-11	3.08e-12	3.69e-10	1.38e-09	3.25e-09	5.99e-09	0.4422	-3.06e-10	-3.49e-10	-3.24e-10	-2.84e-10	-4.01e-11	4.55e-10	1.39e-09	2.78e-09	4.63e-09	0.4422	3.23999e-11	9.26139e-12	3.39528e-11	1.55004e-12	4.63013e-11	3.6267e-10	1.21765e-09	3.07268e-09	5.71323e-09
0.443205	-1.38879e-11	-5.63029e-16	3.70422e-11	5.8642e-11	7.09922e-11	6.32763e-11	8.797e-11	1.37348e-10	1.74397e-10	0.443205	-7.64e-11	-8.48e-11	-8.66e-11	-5.87e-11	2.17e-11	1.75e-10	3.9e-10	7.32e-10	1.22e-09	0.443205	-6.64e-11	-5.56e-11	-7.1e-11	-1.06e-10	-6.17e-12	3.69e-10	1.39e-09	3.28e-09	5.98e-09	0.443205	-2.98e-10	-3.67e-10	-3.33e-10	-2.86e-10	-4.32e-11	4.54e-10	1.38e-09	2.79e-09	4.62e-09	0.443205	1.69829e-11	1.23423e-11	3.85787e-11	9.26026e-12	4.47541e-11	3.62673e-10	1.21148e-09	3.08965e-09	5.7009e-09
0.44421	-1.69756e-11	1.12606e-15	4.78333e-11	5.55588e-11	7.0991e-11	6.78994e-11	8.48845e-11	1.37356e-10	1.86733e-10	0.44421	-7.53e-11	-8.94e-11	-8.52e-11	-5.73e-11	2.1e-11	1.73e-10	3.97e-10	7.36e-10	1.22e-09	0.44421	-7.87e-11	-6.64e-11	-6.48e-11	-8.95e-11	-9.26e-12	3.72e-10	1.38e-09	3.3e-09	5.99e-09	0.44421	-3.07e-10	-3.7e-10	-3.23e-10	-2.81e-10	-4.48e-11	4.61e-10	1.38e-09	2.78e-09	4.64e-09	0.44421	2.0061e-11	4.63548e-12	3.39539e-11	1.85188e-11	4.01304e-11	3.65759e-10	1.21765e-09	3.09891e-09	5.72404e-09
0.445215	-1.85217e-11	3.08995e-12	3.55045e-11	5.4011e-11	7.09877e-11	5.86487e-11	9.25903e-11	1.48153e-10	1.88285e-10	0.445215	-7.38e-11	-8.99e-11	-7.65e-11	-6.5e-11	2.06e-11	1.78e-10	4.02e-10	7.39e-10	1.23e-09	0.445215	-8.03e-11	-6.33e-11	-6.79e-11	-8.33e-11	-1.85e-11	3.7e-10	1.4e-09	3.31e-09	6.02e-09	0.445215	-2.99e-10	-3.7e-10	-3.19e-10	-2.7e-10	-5.71e-11	4.68e-10	1.37e-09	2.76e-09	4.64e-09	0.445215	1.85183e-11	1.23435e-11	3.395e-11	2.62336e-11	4.93834e-11	3.70385e-10	1.21149e-09	3.08811e-09	5.73793e-09
0.44622	-2.62302e-11	1.54283e-11	4.7835e-11	4.16765e-11	6.17342e-11	6.01892e-11	8.17997e-11	1.52788e-10	2.00621e-10	0.44622	-8.33e-11	-9.47e-11	-8.81e-11	-6.34e-11	2.48e-11	1.69e-10	4.05e-10	7.41e-10	1.21e-09	0.44622	-8.49e-11	-6.95e-11	-6.02e-11	-8.03e-11	-2.16e-11	3.67e-10	1.41e-09	3.31e-09	6.01e-09	0.44622	-3.07e-10	-3.66e-10	-3.4e-10	-2.7e-10	-5.86e-11	4.66e-10	1.37e-09	2.79e-09	4.62e-09	0.44622	1.38918e-11	1.23474e-11	2.7778e-11	2.77785e-11	5.40121e-11	3.65762e-10	1.22845e-09	3.08966e-09	5.76107e-09
0.447225	-1.85239e-11	1.54334e-11	4.16692e-11	5.09233e-11	6.01864e-11	6.48162e-11	8.64228e-11	1.66666e-10	1.96e-10	0.447225	-8.34e-11	-9.58e-11	-8.65e-11	-6.19e-11	1.7e-11	1.64e-10	3.94e-10	7.38e-10	1.22e-09	0.447225	-8.33e-11	-8.33e-11	-6.02e-11	-7.56e-11	-2.16e-11	3.55e-10	1.4e-09	3.3e-09	5.98e-09	0.447225	-3.07e-10	-3.58e-10	-3.23e-10	-2.64e-10	-6.02e-11	4.72e-10	1.37e-09	2.78e-09	4.63e-09	0.447225	1.54278e-11	1.54306e-11	1.85222e-11	2.77814e-11	5.09289e-11	3.70383e-10	1.22537e-09	3.09891e-09	5.77496e-09
0.44823	-2.31487e-11	1.69795e-11	3.70399e-11	4.62963e-11	5.40161e-11	6.48213e-11	8.79649e-11	1.57417e-10	1.99084e-10	0.44823	-8.5e-11	-9.82e-11	-8.16e-11	-5.35e-11	3.1e-11	1.62e-10	3.98e-10	7.44e-10	1.22e-09	0.44823	-9.57e-11	-8.18e-11	-6.48e-11	-7.41e-11	-2.16e-11	3.69e-10	1.4e-09	3.31e-09	6.02e-09	0.44823	-3.13e-10	-3.46e-10	-3.27e-10	-2.53e-10	-6.48e-11	4.66e-10	1.4e-09	2.78e-09	4.61e-09	0.44823	3.08995e-12	1.23502e-11	1.6975e-11	3.39477e-11	4.93856e-11	3.6113e-10	1.22383e-09	3.09583e-09	5.78269e-09
0.449235	-2.62313e-11	2.77735e-11	3.54938e-11	3.54989e-11	5.09289e-11	7.40754e-11	8.33429e-11	1.52787e-10	2.02168e-10	0.449235	-7.47e-11	-8.61e-11	-8.61e-11	-5.23e-11	2.85e-11	1.75e-10	3.92e-10	7.41e-10	1.22e-09	0.449235	-8.8e-11	-8.64e-11	-7.1e-11	-6.17e-11	-1.24e-11	3.46e-10	1.4e-09	3.32e-09	6.01e-09	0.449235	-3.09e-10	-3.49e-10	-3.32e-10	-2.67e-10	-6.02e-11	4.75e-10	1.39e-09	2.78e-09	4.63e-09	0.449235	3.37817e-15	2.00604e-11	1.2348e-11	2.77842e-11	4.93845e-11	3.56499e-10	1.23617e-09	3.0912e-09	5.8012e-09
0.45024	-1.69772e-11	2.31509e-11	2.93235e-11	3.39511e-11	4.93839e-11	7.71653e-11	9.4138e-11	1.54328e-10	1.99085e-10	0.45024	-8.14e-11	-9.55e-11	-9.12e-11	-5.99e-11	2.71e-11	1.69e-10	3.96e-10	7.47e-10	1.22e-09	0.45024	-9.57e-11	-9.88e-11	-7.1e-11	-7.1e-11	-1.39e-11	3.47e-10	1.39e-09	3.32e-09	6e-09	0.45024	-3.09e-10	-3.43e-10	-3.52e-10	-2.62e-10	-7.41e-11	4.83e-10	1.39e-09	2.78e-09	4.64e-09	0.45024	6.16863e-12	2.16093e-11	1.23406e-11	3.54893e-11	4.78457e-11	3.53412e-10	1.24234e-09	3.08657e-09	5.80738e-09
0.451245	-1.08064e-11	2.31493e-11	2.62364e-11	2.93235e-11	4.47558e-11	8.33384e-11	9.87656e-11	1.5433e-10	2.00629e-10	0.451245	-7.18e-11	-8.81e-11	-9.17e-11	-4.93e-11	2.72e-11	1.75e-10	4.03e-10	7.47e-10	1.23e-09	0.451245	-9.11e-11	-9.57e-11	-7.72e-11	-6.79e-11	-9.26e-12	3.46e-10	1.4e-09	3.31e-09	6.03e-09	0.451245	-3.13e-10	-3.24e-10	-3.46e-10	-2.65e-10	-7.72e-11	4.82e-10	1.4e-09	2.79e-09	4.64e-09	0.451245	0	3.24056e-11	-3.07812e-12	2.62398e-11	5.71026e-11	3.5187e-10	1.25314e-09	3.09428e-09	5.82127e-09
0.45225	-1.38856e-11	2.31464e-11	2.46903e-11	2.77774e-11	4.16703e-11	9.25919e-11	9.1065e-11	1.58957e-10	2.08337e-10	0.45225	-8.28e-11	-9.15e-11	-9.46e-11	-4.87e-11	2.61e-11	1.78e-10	3.98e-10	7.53e-10	1.23e-09	0.45225	-8.33e-11	-9.26e-11	-7.72e-11	-6.02e-11	-3.09e-12	3.46e-10	1.41e-09	3.3e-09	6.05e-09	0.45225	-3.19e-10	-3.26e-10	-3.61e-10	-2.73e-10	-7.87e-11	4.82e-10	1.42e-09	2.78e-09	4.63e-09	0.45225	-6.16863e-12	3.39517e-11	4.63041e-12	2.77791e-11	6.94404e-11	3.54953e-10	1.25006e-09	3.102e-09	5.84441e-09
0.453255	-6.1737e-12	1.54334e-11	1.69767e-11	2.16122e-11	4.32097e-11	8.79722e-11	1.14194e-10	1.58954e-10	1.97544e-10	0.453255	-7.93e-11	-9.26e-11	-8.52e-11	-5.97e-11	2.73e-11	1.69e-10	3.88e-10	7.47e-10	1.22e-09	0.453255	-8.03e-11	-8.8e-11	-7.72e-11	-6.02e-11	-6.16e-12	3.5e-10	1.4e-09	3.3e-09	6.05e-09	0.453255	-3.4e-10	-3.16e-10	-3.67e-10	-2.79e-10	-7.1e-11	4.75e-10	1.39e-09	2.76e-09	4.63e-09	0.453255	-3.9412e-15	3.39522e-11	1.38845e-11	2.93196e-11	6.17358e-11	3.51873e-10	1.24853e-09	3.10663e-09	5.84287e-09
0.45426	-2.25211e-15	9.25801e-12	1.08081e-11	3.2405e-11	3.85888e-11	9.72212e-11	1.12659e-10	1.48155e-10	1.9754e-10	0.45426	-7.46e-11	-9.25e-11	-8.36e-11	-5.5e-11	3.26e-11	1.81e-10	3.95e-10	7.46e-10	1.23e-09	0.45426	-8.64e-11	-7.56e-11	-8.95e-11	-6.64e-11	1.39e-11	3.6e-10	1.4e-09	3.27e-09	6.05e-09	0.45426	-3.4e-10	-3.3e-10	-3.66e-10	-2.81e-10	-6.79e-11	4.77e-10	1.4e-09	2.76e-09	4.62e-09	0.45426	-4.62647e-12	3.39511e-11	9.26364e-12	2.31504e-11	6.63595e-11	3.59579e-10	1.27166e-09	3.10817e-09	5.84287e-09
0.455265	1.68909e-15	-1.54159e-12	1.85126e-11	3.24129e-11	5.24671e-11	9.10577e-11	1.09579e-10	1.35815e-10	1.95995e-10	0.455265	-7.52e-11	-9.72e-11	-8.21e-11	-6.52e-11	2.7e-11	1.7e-10	3.93e-10	7.45e-10	1.22e-09	0.455265	-7.72e-11	-7.72e-11	-8.64e-11	-6.02e-11	1.85e-11	3.5e-10	1.39e-09	3.3e-09	6.07e-09	0.455265	-3.43e-10	-3.16e-10	-3.78e-10	-2.86e-10	-5.25e-11	4.68e-10	1.39e-09	2.77e-09	4.62e-09	0.455265	0	3.08662e-11	1.54334e-11	2.00632e-11	6.63623e-11	3.50329e-10	1.26704e-09	3.10817e-09	5.84596e-09
0.45627	4.63098e-12	-7.70966e-12	7.72036e-12	4.32102e-11	5.40144e-11	9.56808e-11	1.23455e-10	1.38889e-10	1.89823e-10	0.45627	-7.07e-11	-9.85e-11	-9.09e-11	-5.39e-11	1.98e-11	1.6e-10	3.93e-10	7.47e-10	1.22e-09	0.45627	-7.72e-11	-6.95e-11	-9.41e-11	-6.79e-11	9.26e-12	3.63e-10	1.38e-09	3.29e-09	6.07e-09	0.45627	-3.41e-10	-3.19e-10	-3.73e-10	-2.86e-10	-5.71e-11	4.63e-10	1.4e-09	2.74e-09	4.62e-09	0.45627	4.63098e-12	2.93241e-11	2.31521e-11	1.85149e-11	6.94461e-11	3.51869e-10	1.26704e-09	3.11281e-09	5.84905e-09
0.457275	1.23429e-11	4.62309e-12	7.71867e-12	4.93856e-11	5.40211e-11	9.25993e-11	1.1575e-10	1.23469e-10	1.80573e-10	0.457275	-7.52e-11	-9.99e-11	-8.79e-11	-6.4e-11	2.47e-11	1.72e-10	3.94e-10	7.53e-10	1.22e-09	0.457275	-6.64e-11	-6.94e-11	-9.41e-11	-8.64e-11	1.39e-11	3.69e-10	1.39e-09	3.28e-09	6.09e-09	0.457275	-3.32e-10	-3.23e-10	-3.57e-10	-2.98e-10	-5.86e-11	4.6e-10	1.41e-09	2.76e-09	4.61e-09	0.457275	1.23451e-11	3.24095e-11	3.85748e-11	4.63773e-12	6.79028e-11	3.54956e-10	1.27321e-09	3.13286e-09	5.85522e-09
0.45828	1.08002e-11	-1.54441e-12	1.38896e-11	5.70981e-11	7.09882e-11	9.56791e-11	1.18832e-10	1.25005e-10	1.94442e-10	0.45828	-8.08e-11	-9.1e-11	-7.94e-11	-5.52e-11	2.94e-11	1.68e-10	3.91e-10	7.45e-10	1.24e-09	0.45828	-6.48e-11	-6.02e-11	-9.57e-11	-7.72e-11	9.26e-12	3.69e-10	1.39e-09	3.29e-09	6.11e-09	0.45828	-3.36e-10	-3.24e-10	-3.49e-10	-3.1e-10	-4.48e-11	4.57e-10	1.4e-09	2.75e-09	4.63e-09	0.45828	1.69744e-11	3.70298e-11	3.39567e-11	1.23401e-11	6.17336e-11	3.61126e-10	1.27012e-09	3.14213e-09	5.86293e-09
0.459285	1.5461e-12	-1.07957e-11	2.00616e-11	5.55565e-11	8.02423e-11	8.64284e-11	1.18829e-10	1.23463e-10	1.77484e-10	0.459285	-7.39e-11	-9.65e-11	-9.06e-11	-5.36e-11	3.47e-11	1.74e-10	3.96e-10	7.42e-10	1.25e-09	0.459285	-6.33e-11	-5.71e-11	-9.72e-11	-8.33e-11	6.17e-12	3.77e-10	1.4e-09	3.31e-09	6.13e-09	0.459285	-3.29e-10	-3.27e-10	-3.47e-10	-2.98e-10	-3.86e-11	4.48e-10	1.41e-09	2.76e-09	4.63e-09	0.459285	1.69778e-11	1.69851e-11	4.1663e-11	3.08769e-12	6.17313e-11	3.59589e-10	1.26858e-09	3.15756e-09	5.85985e-09
0.46029	-2.81514e-15	-9.57149e-15	2.31493e-11	4.93896e-11	6.63708e-11	8.95054e-11	1.08034e-10	1.23464e-10	1.77479e-10	0.46029	-7.63e-11	-9.2e-11	-8.26e-11	-5.99e-11	2.83e-11	1.76e-10	4.1e-10	7.41e-10	1.24e-09	0.46029	-6.33e-11	-5.71e-11	-8.49e-11	-8.33e-11	4.63e-12	3.75e-10	1.39e-09	3.29e-09	6.1e-09	0.46029	-3.13e-10	-3.35e-10	-3.3e-10	-3.02e-10	-4.48e-11	4.49e-10	1.4e-09	2.76e-09	4.62e-09	0.46029	2.16054e-11	2.16054e-11	3.39579e-11	-3.07981e-12	6.17268e-11	3.68843e-10	1.27012e-09	3.16681e-09	5.87682e-09
0.461295	-9.25689e-12	-1.5421e-11	2.62369e-11	5.55576e-11	7.87018e-11	7.8708e-11	1.08027e-10	1.28089e-10	1.82105e-10	0.461295	-7.67e-11	-9.06e-11	-8.44e-11	-5.68e-11	2.37e-11	1.72e-10	4.04e-10	7.43e-10	1.23e-09	0.461295	-5.86e-11	-6.79e-11	-8.18e-11	-9.11e-11	7.71e-12	3.78e-10	1.4e-09	3.31e-09	6.09e-09	0.461295	-2.99e-10	-3.64e-10	-3.32e-10	-2.96e-10	-4.01e-11	4.54e-10	1.39e-09	2.77e-09	4.61e-09	0.461295	2.46914e-11	2.46875e-11	4.16664e-11	9.25407e-12	4.93918e-11	3.71931e-10	1.27629e-09	3.16373e-09	5.88145e-09
0.4623	-1.08064e-11	1.53653e-12	3.24078e-11	6.01875e-11	7.56209e-11	6.94472e-11	1.00316e-10	1.2347e-10	1.79021e-10	0.4623	-6.73e-11	-9.09e-11	-9.21e-11	-5.48e-11	2.79e-11	1.76e-10	3.99e-10	7.39e-10	1.22e-09	0.4623	-6.79e-11	-6.48e-11	-8.33e-11	-9.41e-11	-7.71e-12	3.75e-10	1.38e-09	3.3e-09	6.09e-09	0.4623	-3.09e-10	-3.58e-10	-3.3e-10	-2.89e-10	-4.48e-11	4.57e-10	1.39e-09	2.77e-09	4.62e-09	0.4623	2.46925e-11	1.38901e-11	4.32074e-11	6.17595e-12	5.55526e-11	3.73473e-10	1.27012e-09	3.16991e-09	5.87991e-09
0.463305	-2.15998e-11	1.12606e-15	3.54966e-11	6.32724e-11	7.25366e-11	5.8651e-11	9.87668e-11	1.38892e-10	1.77481e-10	0.463305	-6.64e-11	-8.44e-11	-9.19e-11	-5.79e-11	1.76e-11	1.67e-10	4.02e-10	7.38e-10	1.24e-09	0.463305	-6.48e-11	-5.4e-11	-7.87e-11	-9.41e-11	-4.63e-12	3.73e-10	1.41e-09	3.3e-09	6.1e-09	0.463305	-2.96e-10	-3.53e-10	-3.35e-10	-2.86e-10	-4.48e-11	4.6e-10	1.37e-09	2.77e-09	4.63e-09	0.463305	2.46908e-11	4.63154e-12	3.24135e-11	1.08019e-11	4.62991e-11	3.7039e-10	1.26858e-09	3.17762e-09	5.89072e-09
0.46431	-1.54357e-11	1.54328e-12	4.16642e-11	6.01875e-11	7.5617e-11	6.48134e-11	8.79705e-11	1.43525e-10	1.85192e-10	0.46431	-7.58e-11	-1.03e-10	-9.46e-11	-5.2e-11	1.4e-11	1.7e-10	3.98e-10	7.47e-10	1.24e-09	0.46431	-6.94e-11	-5.56e-11	-6.95e-11	-9.11e-11	-7.71e-12	3.75e-10	1.4e-09	3.29e-09	6.1e-09	0.46431	-2.86e-10	-3.75e-10	-3.23e-10	-2.78e-10	-4.48e-11	4.65e-10	1.37e-09	2.78e-09	4.62e-09	0.46431	2.00627e-11	2.81514e-15	3.39494e-11	1.23468e-11	3.85866e-11	3.73477e-10	1.26704e-09	3.19459e-09	5.91231e-09
0.465315	-1.6984e-11	3.08826e-12	3.54995e-11	5.55576e-11	6.79039e-11	5.86476e-11	8.64239e-11	1.48154e-10	1.88282e-10	0.465315	-6.92e-11	-9.05e-11	-8.84e-11	-5.41e-11	2.74e-11	1.72e-10	3.98e-10	7.48e-10	1.24e-09	0.465315	-7.56e-11	-7.72e-11	-7.56e-11	-8.49e-11	-6.18e-12	3.77e-10	1.41e-09	3.31e-09	6.11e-09	0.465315	-3.01e-10	-3.7e-10	-3.33e-10	-2.72e-10	-5.4e-11	4.65e-10	1.39e-09	2.78e-09	4.64e-09	0.465315	1.54334e-11	3.08488e-12	2.77797e-11	1.54351e-11	4.32102e-11	3.82726e-10	1.27166e-09	3.19614e-09	5.91387e-09
0.46632	-4.0113e-11	9.25632e-12	4.01209e-11	4.93823e-11	5.86504e-11	6.01914e-11	8.488e-11	1.48156e-10	1.94455e-10	0.46632	-7.98e-11	-9.14e-11	-8.44e-11	-6.21e-11	2.85e-11	1.71e-10	4e-10	7.42e-10	1.24e-09	0.46632	-8.18e-11	-6.79e-11	-6.33e-11	-8.33e-11	-2.16e-11	3.6e-10	1.4e-09	3.32e-09	6.11e-09	0.46632	-2.9e-10	-3.53e-10	-3.38e-10	-2.7e-10	-5.4e-11	4.8e-10	1.39e-09	2.79e-09	4.63e-09	0.46632	1.23463e-11	1.5461e-12	2.31498e-11	2.46903e-11	4.32086e-11	3.70393e-10	1.27167e-09	3.1946e-09	5.93238e-09
0.467325	-2.93252e-11	6.17764e-12	3.24135e-11	3.55023e-11	6.48117e-11	7.09837e-11	8.17968e-11	1.49701e-10	2.05251e-10	0.467325	-7.06e-11	-9.66e-11	-8.58e-11	-5.94e-11	2.04e-11	1.71e-10	3.9e-10	7.48e-10	1.23e-09	0.467325	-7.72e-11	-7.87e-11	-5.4e-11	-7.72e-11	-2.01e-11	3.58e-10	1.39e-09	3.31e-09	6.14e-09	0.467325	-2.93e-10	-3.58e-10	-3.4e-10	-2.64e-10	-5.56e-11	4.71e-10	1.38e-09	2.8e-09	4.63e-09	0.467325	9.25914e-12	7.71079e-12	2.00621e-11	2.77797e-11	3.39624e-11	3.70385e-10	1.27629e-09	3.18843e-09	5.93548e-09
0.46833	-2.62392e-11	1.54334e-11	3.70382e-11	4.0122e-11	5.40177e-11	6.17392e-11	8.64216e-11	1.58953e-10	2.00626e-10	0.46833	-7.54e-11	-9.11e-11	-8.41e-11	-5.27e-11	2.21e-11	1.64e-10	3.99e-10	7.57e-10	1.23e-09	0.46833	-8.95e-11	-7.72e-11	-6.02e-11	-6.17e-11	-2.01e-11	3.55e-10	1.4e-09	3.31e-09	6.16e-09	0.46833	-3.04e-10	-3.49e-10	-3.46e-10	-2.56e-10	-6.94e-11	4.8e-10	1.36e-09	2.79e-09	4.63e-09	0.46833	4.62985e-12	-1.53428e-12	1.54362e-11	3.24067e-11	5.24671e-11	3.61135e-10	1.27167e-09	3.19767e-09	5.96016e-09
0.469335	-3.24022e-11	2.62279e-11	4.01203e-11	3.54966e-11	5.09289e-11	7.40754e-11	8.48851e-11	1.52789e-10	1.94458e-10	0.469335	-8.15e-11	-9.28e-11	-8.56e-11	-5.3e-11	3.33e-11	1.75e-10	3.94e-10	7.49e-10	1.24e-09	0.469335	-1.03e-10	-7.87e-11	-6.02e-11	-6.79e-11	-1.7e-11	3.44e-10	1.4e-09	3.32e-09	6.16e-09	0.469335	-3.15e-10	-3.47e-10	-3.4e-10	-2.62e-10	-7.41e-11	4.74e-10	1.37e-09	2.79e-09	4.67e-09	0.469335	-1.12606e-15	1.38884e-11	2.00576e-11	3.08657e-11	5.86397e-11	3.68839e-10	1.2763e-09	3.18072e-09	5.98639e-09
0.47034	-2.00632e-11	1.54373e-11	2.93241e-11	3.39522e-11	4.93834e-11	8.02507e-11	9.56785e-11	1.57409e-10	2.00629e-10	0.47034	-7.11e-11	-8.98e-11	-8.32e-11	-5.15e-11	2.55e-11	1.68e-10	4.01e-10	7.5e-10	1.26e-09	0.47034	-9.26e-11	-8.64e-11	-6.33e-11	-6.02e-11	-1.7e-11	3.55e-10	1.39e-09	3.33e-09	6.15e-09	0.47034	-3.12e-10	-3.36e-10	-3.44e-10	-2.65e-10	-7.72e-11	4.72e-10	1.39e-09	2.78e-09	4.67e-09	0.47034	-7.71529e-12	2.62313e-11	1.08075e-11	2.93224e-11	5.0934e-11	3.61133e-10	1.28864e-09	3.19151e-09	5.99875e-09
0.471345	-9.26026e-12	1.69744e-11	2.31521e-11	3.24061e-11	4.32136e-11	8.64228e-11	9.2601e-11	1.45078e-10	2.11425e-10	0.471345	-7.07e-11	-9e-11	-9.2e-11	-5.46e-11	2.54e-11	1.8e-10	4e-10	7.56e-10	1.24e-09	0.471345	-8.95e-11	-8.64e-11	-7.1e-11	-5.71e-11	-7.72e-12	3.61e-10	1.4e-09	3.31e-09	6.17e-09	0.471345	-3.23e-10	-3.3e-10	-3.63e-10	-2.61e-10	-8.18e-11	4.77e-10	1.4e-09	2.77e-09	4.68e-09	0.471345	-1.23412e-11	2.62386e-11	1.38867e-11	2.77808e-11	5.86448e-11	3.67295e-10	1.2871e-09	3.18842e-09	6.01726e-09
0.47235	-6.75634e-15	1.38907e-11	2.4688e-11	2.3156e-11	4.16709e-11	8.95082e-11	1.00312e-10	1.58949e-10	2.0834e-10	0.47235	-6.96e-11	-8.1e-11	-8.43e-11	-5.82e-11	2.11e-11	1.72e-10	3.93e-10	7.58e-10	1.25e-09	0.47235	-8.8e-11	-8.8e-11	-7.72e-11	-5.86e-11	-3.09e-12	3.53e-10	1.39e-09	3.31e-09	6.18e-09	0.47235	-3.24e-10	-3.27e-10	-3.6e-10	-2.72e-10	-7.25e-11	4.88e-10	1.4e-09	2.78e-09	4.69e-09	0.47235	-3.08995e-12	3.39511e-11	9.26252e-12	3.08612e-11	6.63601e-11	3.54959e-10	1.29328e-09	3.18534e-09	6.0219e-09
0.473355	-9.25069e-12	1.38856e-11	1.38924e-11	3.24033e-11	4.62963e-11	8.64267e-11	1.03401e-10	1.46612e-10	1.95999e-10	0.473355	-6.97e-11	-8.98e-11	-8.32e-11	-5.05e-11	2.7e-11	1.7e-10	3.88e-10	7.54e-10	1.25e-09	0.473355	-8.49e-11	-7.87e-11	-7.72e-11	-5.71e-11	-1.54e-12	3.55e-10	1.38e-09	3.33e-09	6.17e-09	0.473355	-3.29e-10	-3.36e-10	-3.63e-10	-2.72e-10	-6.94e-11	4.74e-10	1.41e-09	2.77e-09	4.65e-09	0.473355	-3.08544e-12	3.85776e-11	1.23502e-11	2.16122e-11	7.09871e-11	3.53411e-10	1.31024e-09	3.18843e-09	6.03732e-09
0.47436	6.16581e-12	3.08882e-12	1.08047e-11	2.62392e-11	4.47597e-11	9.10549e-11	1.0957e-10	1.35815e-10	1.89822e-10	0.47436	-7.44e-11	-9.11e-11	-7.73e-11	-6.39e-11	2.3e-11	1.72e-10	3.98e-10	7.56e-10	1.24e-09	0.47436	-8.33e-11	-7.72e-11	-7.87e-11	-6.02e-11	7.71e-12	3.69e-10	1.37e-09	3.31e-09	6.17e-09	0.47436	-3.35e-10	-3.3e-10	-3.66e-10	-2.86e-10	-6.79e-11	4.75e-10	1.41e-09	2.79e-09	4.68e-09	0.47436	-3.37817e-15	3.08685e-11	2.62268e-11	2.93156e-11	6.48196e-11	3.48787e-10	1.30716e-09	3.19768e-09	6.03886e-09
0.475365	1.54497e-12	-1.54385e-12	1.23463e-11	2.93258e-11	5.55548e-11	9.87679e-11	1.08033e-10	1.40436e-10	1.79027e-10	0.475365	-6.76e-11	-9.25e-11	-8.19e-11	-5.85e-11	2.36e-11	1.65e-10	3.93e-10	7.49e-10	1.24e-09	0.475365	-6.64e-11	-7.41e-11	-8.8e-11	-5.56e-11	6.17e-12	3.63e-10	1.36e-09	3.31e-09	6.17e-09	0.475365	-3.53e-10	-3.29e-10	-3.84e-10	-2.87e-10	-5.86e-11	4.71e-10	1.4e-09	2.76e-09	4.66e-09	0.475365	-6.16638e-12	3.08668e-11	1.54402e-11	1.85222e-11	6.32769e-11	3.58036e-10	1.31179e-09	3.19306e-09	6.03116e-09
0.47637	1.54328e-12	-7.71022e-12	1.3889e-11	4.1663e-11	5.71054e-11	1.00309e-10	1.14202e-10	1.37351e-10	1.8519e-10	0.47637	-7.69e-11	-9.23e-11	-7.99e-11	-5.04e-11	1.8e-11	1.66e-10	3.93e-10	7.63e-10	1.24e-09	0.47637	-6.17e-11	-7.41e-11	-9.11e-11	-6.48e-11	9.26e-12	3.7e-10	1.36e-09	3.33e-09	6.19e-09	0.47637	-3.35e-10	-3.19e-10	-3.72e-10	-2.87e-10	-5.56e-11	4.69e-10	1.41e-09	2.77e-09	4.66e-09	0.47637	6.16919e-12	3.39505e-11	2.46942e-11	1.54334e-11	6.79028e-11	3.51874e-10	1.32567e-09	3.21157e-09	6.03578e-09
0.477375	1.54103e-12	3.08037e-12	1.38907e-11	3.85866e-11	6.94433e-11	9.10571e-11	1.17286e-10	1.31178e-10	1.80564e-10	0.477375	-7.94e-11	-8.91e-11	-8.31e-11	-5.15e-11	2.61e-11	1.64e-10	4.02e-10	7.49e-10	1.25e-09	0.477375	-7.1e-11	-6.33e-11	-9.88e-11	-7.25e-11	1.39e-11	3.73e-10	1.36e-09	3.31e-09	6.16e-09	0.477375	-3.29e-10	-3.29e-10	-3.58e-10	-3.04e-10	-6.17e-11	4.66e-10	1.41e-09	2.76e-09	4.66e-09	0.477375	7.72092e-12	3.24067e-11	3.85748e-11	1.38879e-11	6.79062e-11	3.61126e-10	1.32259e-09	3.22392e-09	6.04504e-09
0.47838	-4.62704e-12	-3.08938e-12	1.6975e-11	4.78395e-11	6.94506e-11	9.10509e-11	1.11119e-10	1.2192e-10	1.74392e-10	0.47838	-7.57e-11	-8.5e-11	-8.03e-11	-6.12e-11	2.16e-11	1.73e-10	3.96e-10	7.56e-10	1.25e-09	0.47838	-6.17e-11	-6.17e-11	-9.26e-11	-8.33e-11	9.26e-12	3.78e-10	1.39e-09	3.31e-09	6.16e-09	0.47838	-3.32e-10	-3.35e-10	-3.44e-10	-3.04e-10	-4.48e-11	4.54e-10	1.4e-09	2.76e-09	4.64e-09	0.47838	2.16026e-11	2.46976e-11	3.24106e-11	7.71698e-12	7.25287e-11	3.62673e-10	1.30717e-09	3.22855e-09	6.05121e-09
0.479385	-3.086e-12	-1.69705e-11	1.69756e-11	5.09267e-11	7.71608e-11	8.33379e-11	1.12657e-10	1.1421e-10	1.69765e-10	0.479385	-7.66e-11	-8.3e-11	-8.49e-11	-5.63e-11	2.56e-11	1.72e-10	4.04e-10	7.59e-10	1.25e-09	0.479385	-6.17e-11	-6.02e-11	-9.41e-11	-8.64e-11	7.72e-12	3.83e-10	1.39e-09	3.32e-09	6.15e-09	0.479385	-3.26e-10	-3.35e-10	-3.4e-10	-2.99e-10	-3.86e-11	4.48e-10	1.41e-09	2.77e-09	4.65e-09	0.479385	2.6233e-11	3.08595e-11	3.08719e-11	3.08995e-12	6.17319e-11	3.68846e-10	1.31179e-09	3.24089e-09	6.04042e-09
0.48039	-5.63029e-15	-1.54334e-11	1.54385e-11	4.93913e-11	7.56215e-11	7.71653e-11	1.0649e-10	1.25003e-10	1.75934e-10	0.48039	-7.88e-11	-9.54e-11	-8.1e-11	-5.34e-11	2.85e-11	1.7e-10	4.01e-10	7.62e-10	1.25e-09	0.48039	-6.48e-11	-5.71e-11	-8.64e-11	-8.64e-11	4.63e-12	3.77e-10	1.38e-09	3.31e-09	6.14e-09	0.48039	-3.18e-10	-3.29e-10	-3.29e-10	-3.04e-10	-4.32e-11	4.46e-10	1.39e-09	2.78e-09	4.64e-09	0.48039	2.31532e-11	2.00661e-11	4.62889e-11	7.7136e-12	5.24756e-11	3.79644e-10	1.30717e-09	3.24245e-09	6.05738e-09
0.481395	-1.23412e-11	-1.54306e-11	2.9319e-11	6.48078e-11	7.56203e-11	7.40782e-11	1.09568e-10	1.26549e-10	1.82104e-10	0.481395	-7.17e-11	-9.34e-11	-8.82e-11	-6.57e-11	2.54e-11	1.7e-10	4e-10	7.49e-10	1.25e-09	0.481395	-6.17e-11	-6.33e-11	-8.03e-11	-9.41e-11	-1.54e-12	3.89e-10	1.38e-09	3.3e-09	6.15e-09	0.481395	-3.07e-10	-3.47e-10	-3.4e-10	-2.98e-10	-4.01e-11	4.58e-10	1.38e-09	2.79e-09	4.64e-09	0.481395	3.08623e-11	1.8516e-11	3.55028e-11	4.63098e-12	5.40132e-11	3.7965e-10	1.31641e-09	3.26712e-09	6.05276e-09
0.4824	-1.08064e-11	-9.2597e-12	3.39539e-11	5.24778e-11	7.40787e-11	7.25304e-11	9.8769e-11	1.28094e-10	1.79024e-10	0.4824	-7.17e-11	-8.42e-11	-8.76e-11	-4.97e-11	2.5e-11	1.71e-10	3.99e-10	7.57e-10	1.25e-09	0.4824	-6.48e-11	-6.33e-11	-8.02e-11	-9.88e-11	-1.54e-12	3.86e-10	1.38e-09	3.32e-09	6.13e-09	0.4824	-2.98e-10	-3.33e-10	-3.3e-10	-2.98e-10	-4.01e-11	4.52e-10	1.39e-09	2.78e-09	4.64e-09	0.4824	2.93196e-11	7.71811e-12	4.47496e-11	4.63379e-12	5.09278e-11	3.85816e-10	1.29945e-09	3.26713e-09	6.06202e-09
0.483405	-1.85149e-11	-3.08995e-12	4.3208e-11	5.70992e-11	7.56181e-11	6.01943e-11	8.4884e-11	1.34265e-10	1.85194e-10	0.483405	-6.91e-11	-8.81e-11	-8.27e-11	-6.37e-11	2.68e-11	1.69e-10	4.04e-10	7.64e-10	1.25e-09	0.483405	-6.64e-11	-6.02e-11	-6.94e-11	-8.33e-11	-1.55e-12	3.75e-10	1.4e-09	3.33e-09	6.15e-09	0.483405	-3.01e-10	-3.6e-10	-3.32e-10	-2.92e-10	-4.48e-11	4.58e-10	1.39e-09	2.78e-09	4.65e-09	0.483405	2.00649e-11	1.5461e-12	3.85821e-11	1.54261e-11	4.62968e-11	3.78108e-10	1.29944e-09	3.27176e-09	6.08053e-09
0.48441	-1.38907e-11	-6.16638e-12	4.16675e-11	5.55554e-11	6.94528e-11	6.48162e-11	8.02581e-11	1.37356e-10	1.91368e-10	0.48441	-7.55e-11	-9.62e-11	-8.11e-11	-5.32e-11	1.7e-11	1.65e-10	4.06e-10	7.54e-10	1.26e-09	0.48441	-6.64e-11	-5.71e-11	-5.25e-11	-9.57e-11	-1.23e-11	3.81e-10	1.4e-09	3.33e-09	6.14e-09	0.48441	-2.84e-10	-3.58e-10	-3.3e-10	-2.78e-10	-4.63e-11	4.63e-10	1.39e-09	2.81e-09	4.65e-09	0.48441	1.69801e-11	3.08938e-12	3.24106e-11	7.72148e-12	3.7045e-11	3.79651e-10	1.2979e-09	3.28564e-09	6.09288e-09
0.485415	-1.23513e-11	9.25689e-12	3.70427e-11	4.6303e-11	7.71563e-11	6.4819e-11	9.56734e-11	1.5124e-10	1.99086e-10	0.485415	-7.5e-11	-8.35e-11	-9.19e-11	-5.99e-11	3.18e-11	1.8e-10	4.02e-10	7.55e-10	1.25e-09	0.485415	-8.49e-11	-6.64e-11	-6.33e-11	-8.95e-11	-1.85e-11	3.73e-10	1.41e-09	3.35e-09	6.16e-09	0.485415	-2.9e-10	-3.61e-10	-3.33e-10	-2.67e-10	-4.48e-11	4.69e-10	1.4e-09	2.78e-09	4.65e-09	0.485415	2.46875e-11	1.23395e-11	3.08629e-11	1.38884e-11	4.47547e-11	3.88902e-10	1.30562e-09	3.27948e-09	6.09906e-09
0.48642	-2.46875e-11	1.69756e-11	4.32091e-11	4.93806e-11	6.32802e-11	6.79022e-11	8.33413e-11	1.60496e-10	2.12967e-10	0.48642	-7.51e-11	-8.49e-11	-8.76e-11	-6.18e-11	2.05e-11	1.69e-10	3.97e-10	7.63e-10	1.25e-09	0.48642	-8.18e-11	-7.56e-11	-5.09e-11	-8.64e-11	-2.16e-11	3.72e-10	1.42e-09	3.36e-09	6.13e-09	0.48642	-2.99e-10	-3.55e-10	-3.27e-10	-2.64e-10	-5.56e-11	4.71e-10	1.38e-09	2.8e-09	4.65e-09	0.48642	1.85171e-11	3.09332e-12	2.1611e-11	1.69823e-11	5.09244e-11	3.84275e-10	1.31642e-09	3.28257e-09	6.12683e-09
0.487425	-2.31481e-11	2.31453e-11	4.16675e-11	4.01282e-11	6.48145e-11	6.48224e-11	8.17946e-11	1.55875e-10	2.11433e-10	0.487425	-7.24e-11	-8.85e-11	-8.6e-11	-5.17e-11	2.79e-11	1.69e-10	4.04e-10	7.64e-10	1.24e-09	0.487425	-8.95e-11	-8.64e-11	-5.86e-11	-8.02e-11	-3.24e-11	3.66e-10	1.43e-09	3.34e-09	6.15e-09	0.487425	-3.07e-10	-3.55e-10	-3.46e-10	-2.65e-10	-6.94e-11	4.77e-10	1.39e-09	2.79e-09	4.65e-09	0.487425	6.17708e-12	1.23446e-11	2.62296e-11	3.70259e-11	4.63036e-11	3.7194e-10	1.31334e-09	3.29028e-09	6.12839e-09
0.48843	-1.85233e-11	1.85205e-11	3.70394e-11	3.85804e-11	5.70992e-11	7.40765e-11	8.17951e-11	1.60499e-10	2.17597e-10	0.48843	-7.14e-11	-9.12e-11	-8.59e-11	-5.91e-11	2.48e-11	1.69e-10	4.01e-10	7.65e-10	1.25e-09	0.48843	-9.72e-11	-8.33e-11	-6.79e-11	-7.1e-11	-2.31e-11	3.55e-10	1.43e-09	3.35e-09	6.16e-09	0.48843	-2.95e-10	-3.46e-10	-3.24e-10	-2.61e-10	-6.64e-11	4.82e-10	1.39e-09	2.79e-09	4.64e-09	0.48843	4.63098e-12	1.69744e-11	1.38935e-11	2.16167e-11	5.55515e-11	3.82724e-10	1.31334e-09	3.28565e-09	6.15307e-09
0.489435	-2.46869e-11	1.69801e-11	3.39505e-11	3.24084e-11	4.32198e-11	8.0244e-11	8.48851e-11	1.57415e-10	2.08351e-10	0.489435	-7.33e-11	-9.48e-11	-9.06e-11	-5.94e-11	2.84e-11	1.69e-10	4e-10	7.62e-10	1.25e-09	0.489435	-1e-10	-8.18e-11	-6.79e-11	-7.41e-11	-1.54e-11	3.49e-10	1.43e-09	3.33e-09	6.17e-09	0.489435	-3.12e-10	-3.43e-10	-3.38e-10	-2.65e-10	-6.64e-11	4.82e-10	1.38e-09	2.8e-09	4.66e-09	0.489435	6.17257e-12	1.69795e-11	1.23485e-11	3.54882e-11	4.63024e-11	3.65764e-10	1.31796e-09	3.27485e-09	6.17004e-09
0.49044	-1.54362e-11	2.62324e-11	2.62347e-11	2.46982e-11	5.09233e-11	6.79146e-11	1.00307e-10	1.54331e-10	2.19137e-10	0.49044	-7.54e-11	-8.82e-11	-9e-11	-5.77e-11	2.24e-11	1.72e-10	3.95e-10	7.63e-10	1.26e-09	0.49044	-9.57e-11	-9.26e-11	-6.33e-11	-6.79e-11	-9.26e-12	3.44e-10	1.42e-09	3.35e-09	6.15e-09	0.49044	-3.12e-10	-3.33e-10	-3.49e-10	-2.73e-10	-7.87e-11	4.88e-10	1.4e-09	2.78e-09	4.65e-09	0.49044	6.16863e-12	2.62353e-11	1.69716e-11	2.93252e-11	4.78463e-11	3.6576e-10	1.3226e-09	3.27177e-09	6.17777e-09
0.491445	-1.54306e-11	2.62324e-11	1.54351e-11	3.24033e-11	4.4758e-11	8.33334e-11	9.87713e-11	1.58957e-10	2.05263e-10	0.491445	-7.91e-11	-8.99e-11	-8.55e-11	-5.92e-11	3.92e-11	1.74e-10	4e-10	7.71e-10	1.25e-09	0.491445	-8.8e-11	-9.41e-11	-6.64e-11	-6.17e-11	-6.17e-12	3.43e-10	1.4e-09	3.36e-09	6.15e-09	0.491445	-3.18e-10	-3.33e-10	-3.55e-10	-2.72e-10	-8.02e-11	4.82e-10	1.39e-09	2.78e-09	4.65e-09	0.491445	-6.16863e-12	3.39483e-11	9.26308e-12	3.08634e-11	6.17246e-11	3.70381e-10	1.33185e-09	3.28873e-09	6.19782e-09
0.49245	-9.26083e-12	1.69778e-11	1.08086e-11	2.46954e-11	4.62979e-11	8.79666e-11	1.0032e-10	1.60496e-10	2.08343e-10	0.49245	-7.58e-11	-8.39e-11	-9.52e-11	-5.52e-11	2.86e-11	1.68e-10	3.99e-10	7.69e-10	1.26e-09	0.49245	-8.33e-11	-8.8e-11	-7.41e-11	-6.33e-11	3.08e-12	3.52e-10	1.4e-09	3.36e-09	6.15e-09	0.49245	-3.38e-10	-3.23e-10	-3.63e-10	-2.7e-10	-7.56e-11	4.77e-10	1.41e-09	2.78e-09	4.67e-09	0.49245	-6.16976e-12	3.08691e-11	1.0803e-11	2.62375e-11	5.71094e-11	3.54963e-10	1.31952e-09	3.28103e-09	6.1932e-09
0.493455	-6.17257e-12	1.2344e-11	2.16009e-11	2.46931e-11	4.62985e-11	9.10537e-11	1.18823e-10	1.48159e-10	2.11423e-10	0.493455	-7.1e-11	-9.09e-11	-8.34e-11	-6.89e-11	3.29e-11	1.68e-10	3.97e-10	7.73e-10	1.25e-09	0.493455	-8.18e-11	-8.8e-11	-8.95e-11	-6.17e-11	0	3.61e-10	1.41e-09	3.34e-09	6.15e-09	0.493455	-3.29e-10	-3.16e-10	-3.69e-10	-2.78e-10	-7.72e-11	4.8e-10	1.41e-09	2.78e-09	4.67e-09	0.493455	3.08037e-12	3.70337e-11	1.23468e-11	2.62341e-11	7.40703e-11	3.59584e-10	1.34265e-09	3.29028e-09	6.19937e-09
0.49446	-1.54554e-12	1.54948e-12	1.85155e-11	2.62353e-11	4.63019e-11	9.41403e-11	1.0958e-10	1.46611e-10	1.94462e-10	0.49446	-7.11e-11	-8.17e-11	-7.65e-11	-5.6e-11	2.44e-11	1.73e-10	4.06e-10	7.71e-10	1.26e-09	0.49446	-7.56e-11	-8.64e-11	-8.8e-11	-6.64e-11	-3.08e-12	3.52e-10	1.4e-09	3.32e-09	6.16e-09	0.49446	-3.33e-10	-3.07e-10	-3.7e-10	-2.86e-10	-6.79e-11	4.77e-10	1.41e-09	2.77e-09	4.66e-09	0.49446	-4.62478e-12	2.93269e-11	1.54311e-11	2.16048e-11	7.0991e-11	3.61126e-10	1.33649e-09	3.29336e-09	6.19475e-09
0.495465	-3.0815e-12	7.7136e-12	4.6383e-12	2.62369e-11	5.55593e-11	9.72274e-11	1.20371e-10	1.41983e-10	1.99081e-10	0.495465	-7.17e-11	-8.51e-11	-8.77e-11	-6.47e-11	2.05e-11	1.73e-10	3.96e-10	7.66e-10	1.25e-09	0.495465	-6.64e-11	-8.64e-11	-8.95e-11	-6.17e-11	1.39e-11	3.63e-10	1.39e-09	3.33e-09	6.16e-09	0.495465	-3.52e-10	-3.21e-10	-3.69e-10	-2.96e-10	-5.71e-11	4.74e-10	1.42e-09	2.77e-09	4.68e-09	0.495465	1.54272e-12	3.39505e-11	1.38941e-11	1.38918e-11	6.79067e-11	3.56505e-10	1.34728e-09	3.29028e-09	6.21017e-09
0.49647	9.25294e-12	6.17088e-12	1.38856e-11	2.93235e-11	6.78977e-11	1.01854e-10	1.17288e-10	1.40435e-10	1.95994e-10	0.49647	-7.48e-11	-9.14e-11	-8.73e-11	-6.25e-11	2.58e-11	1.75e-10	3.96e-10	7.66e-10	1.26e-09	0.49647	-6.64e-11	-6.64e-11	-9.88e-11	-6.64e-11	1.39e-11	3.72e-10	1.39e-09	3.31e-09	6.18e-09	0.49647	-3.46e-10	-3.21e-10	-3.58e-10	-3.02e-10	-4.94e-11	4.63e-10	1.42e-09	2.75e-09	4.66e-09	0.49647	6.17313e-12	3.395e-11	2.46908e-11	1.23451e-11	7.09871e-11	3.68838e-10	1.3442e-09	3.29799e-09	6.20555e-09
0.497475	3.08488e-12	-1.54216e-12	1.2348e-11	3.54966e-11	6.17381e-11	1.00311e-10	1.09578e-10	1.29642e-10	1.85199e-10	0.497475	-8.18e-11	-9.58e-11	-8.13e-11	-5.72e-11	2.47e-11	1.69e-10	3.97e-10	7.75e-10	1.26e-09	0.497475	-6.64e-11	-6.48e-11	-9.41e-11	-7.41e-11	1.54e-11	3.7e-10	1.38e-09	3.29e-09	6.18e-09	0.497475	-3.46e-10	-3.33e-10	-3.56e-10	-3.06e-10	-5.25e-11	4.65e-10	1.42e-09	2.78e-09	4.65e-09	0.497475	1.08035e-11	2.77797e-11	3.08662e-11	7.71754e-12	6.32769e-11	3.62677e-10	1.34883e-09	3.29183e-09	6.22251e-09
0.49848	-7.7091e-12	-6.17144e-12	1.54323e-11	4.47552e-11	7.40731e-11	9.1056e-11	1.15741e-10	1.35804e-10	1.88277e-10	0.49848	-7.95e-11	-8.95e-11	-8.77e-11	-5.64e-11	2.95e-11	1.75e-10	4.05e-10	7.73e-10	1.25e-09	0.49848	-6.33e-11	-6.79e-11	-9.41e-11	-8.33e-11	9.26e-12	3.8e-10	1.38e-09	3.31e-09	6.19e-09	0.49848	-3.29e-10	-3.41e-10	-3.47e-10	-3.07e-10	-4.48e-11	4.57e-10	1.41e-09	2.78e-09	4.66e-09	0.49848	1.69761e-11	2.31526e-11	3.85798e-11	6.1737e-12	6.17325e-11	3.7193e-10	1.3442e-09	3.30725e-09	6.21326e-09
0.499485	1.53878e-12	-6.17482e-12	1.69789e-11	5.40082e-11	7.40799e-11	8.79677e-11	1.06492e-10	1.2964e-10	1.82109e-10	0.499485	-7.43e-11	-8.87e-11	-9.94e-11	-5.64e-11	2.12e-11	1.67e-10	4.06e-10	7.71e-10	1.26e-09	0.499485	-6.17e-11	-4.79e-11	-9.57e-11	-8.33e-11	-1.54e-12	3.81e-10	1.38e-09	3.31e-09	6.17e-09	0.499485	-3.19e-10	-3.47e-10	-3.44e-10	-3.12e-10	-3.7e-11	4.57e-10	1.42e-09	2.79e-09	4.65e-09	0.499485	2.3147e-11	2.77769e-11	4.01226e-11	6.17032e-12	6.32718e-11	3.76561e-10	1.3442e-09	3.31189e-09	6.20247e-09
0.50049	-1.54441e-12	-1.08019e-11	2.62324e-11	4.47659e-11	8.02462e-11	8.64205e-11	1.12656e-10	1.34261e-10	1.79025e-10	0.50049	-7.25e-11	-8.72e-11	-8.42e-11	-4.92e-11	2.44e-11	1.71e-10	4.01e-10	7.65e-10	1.26e-09	0.50049	-6.48e-11	-5.71e-11	-8.95e-11	-8.49e-11	4.63e-12	3.9e-10	1.39e-09	3.3e-09	6.16e-09	0.50049	-3.09e-10	-3.43e-10	-3.32e-10	-2.96e-10	-3.7e-11	4.49e-10	1.41e-09	2.77e-09	4.64e-09	0.50049	2.31459e-11	2.62324e-11	3.39567e-11	-1.53878e-12	5.71026e-11	3.81193e-10	1.34111e-09	3.32269e-09	6.2333e-09
0.501495	-7.71642e-12	-1.23423e-11	2.62403e-11	6.48089e-11	7.40787e-11	7.56215e-11	1.08025e-10	1.26553e-10	1.86737e-10	0.501495	-7.64e-11	-8.86e-11	-8.96e-11	-5.73e-11	3.05e-11	1.69e-10	4.12e-10	7.69e-10	1.27e-09	0.501495	-6.02e-11	-5.86e-11	-7.72e-11	-8.8e-11	1.54e-12	3.89e-10	1.39e-09	3.31e-09	6.15e-09	0.501495	-3.16e-10	-3.58e-10	-3.35e-10	-2.99e-10	-4.78e-11	4.49e-10	1.4e-09	2.78e-09	4.65e-09	0.501495	1.39008e-11	1.54345e-11	4.01203e-11	3.086e-12	5.40144e-11	3.91993e-10	1.33494e-09	3.33349e-09	6.20864e-09
0.5025	-1.38873e-11	-3.09163e-12	3.85748e-11	6.01886e-11	7.09927e-11	6.63646e-11	8.95183e-11	1.29639e-10	1.94448e-10	0.5025	-6.88e-11	-9.47e-11	-8.45e-11	-4.78e-11	2.69e-11	1.71e-10	4.06e-10	7.65e-10	1.25e-09	0.5025	-6.94e-11	-5.71e-11	-6.64e-11	-9.72e-11	-1.54e-12	3.86e-10	1.4e-09	3.32e-09	6.17e-09	0.5025	-2.86e-10	-3.49e-10	-3.23e-10	-2.95e-10	-4.48e-11	4.55e-10	1.39e-09	2.79e-09	4.65e-09	0.5025	3.54803e-11	9.26252e-12	3.24129e-11	6.17313e-12	4.93834e-11	3.99705e-10	1.32415e-09	3.33812e-09	6.22251e-09
0.503505	-1.38912e-11	-7.71079e-12	3.08679e-11	5.71015e-11	7.2536e-11	6.63601e-11	9.25953e-11	1.40438e-10	1.85201e-10	0.503505	-6.66e-11	-8.86e-11	-8.87e-11	-5.74e-11	3.03e-11	1.76e-10	4.16e-10	7.69e-10	1.27e-09	0.503505	-7.41e-11	-6.48e-11	-6.33e-11	-9.41e-11	-3.09e-12	3.8e-10	1.41e-09	3.32e-09	6.15e-09	0.503505	-3.01e-10	-3.63e-10	-3.23e-10	-2.96e-10	-4.78e-11	4.78e-10	1.4e-09	2.8e-09	4.67e-09	0.503505	1.5443e-11	1.08019e-11	3.54938e-11	9.2597e-12	4.01299e-11	3.91997e-10	1.33494e-09	3.33966e-09	6.22561e-09
0.50451	-1.85194e-11	3.086e-12	2.93263e-11	5.40166e-11	7.86996e-11	6.32774e-11	9.10532e-11	1.48155e-10	1.95995e-10	0.50451	-6.74e-11	-9.18e-11	-8.82e-11	-6.82e-11	2.02e-11	1.73e-10	4.12e-10	7.79e-10	1.25e-09	0.50451	-7.25e-11	-7.1e-11	-6.94e-11	-8.18e-11	-2.16e-11	3.81e-10	1.42e-09	3.36e-09	6.19e-09	0.50451	-2.81e-10	-3.7e-10	-3.3e-10	-2.82e-10	-4.48e-11	4.66e-10	1.38e-09	2.8e-09	4.67e-09	0.50451	2.3147e-11	9.26083e-12	3.39489e-11	1.23435e-11	4.32108e-11	3.91992e-10	1.33186e-09	3.33041e-09	6.23795e-09
0.505515	-2.31509e-11	1.2344e-11	3.85815e-11	5.55543e-11	6.32786e-11	6.78988e-11	8.7966e-11	1.55868e-10	2.00625e-10	0.505515	-6.75e-11	-8.17e-11	-9.11e-11	-5.73e-11	2.72e-11	1.75e-10	4.07e-10	7.77e-10	1.25e-09	0.505515	-8.8e-11	-6.95e-11	-4.79e-11	-9.26e-11	-1.7e-11	3.78e-10	1.43e-09	3.36e-09	6.18e-09	0.505515	-3.01e-10	-3.63e-10	-3.3e-10	-2.86e-10	-5.09e-11	4.72e-10	1.39e-09	2.8e-09	4.67e-09	0.505515	2.46908e-11	1.0799e-11	2.31549e-11	7.72261e-12	4.32102e-11	3.87366e-10	1.33802e-09	3.34584e-09	6.25647e-09
0.50652	-3.24011e-11	1.54311e-11	4.62918e-11	4.63036e-11	5.86476e-11	5.71105e-11	8.17997e-11	1.54326e-10	1.99086e-10	0.50652	-7.23e-11	-9.57e-11	-8.84e-11	-6.2e-11	2.51e-11	1.74e-10	4.17e-10	7.74e-10	1.26e-09	0.50652	-8.95e-11	-7.87e-11	-6.02e-11	-8.8e-11	-2.31e-11	3.7e-10	1.42e-09	3.37e-09	6.17e-09	0.50652	-3.04e-10	-3.69e-10	-3.32e-10	-2.67e-10	-5.4e-11	4.77e-10	1.36e-09	2.82e-09	4.69e-09	0.50652	2.16043e-11	1.54891e-12	2.7774e-11	2.0061e-11	3.85849e-11	3.87361e-10	1.33802e-09	3.35817e-09	6.26111e-09
0.507525	-2.00689e-11	1.38929e-11	3.55023e-11	5.09199e-11	6.17235e-11	7.0986e-11	9.10481e-11	1.46619e-10	2.05258e-10	0.507525	-6.5e-11	-8.62e-11	-9.15e-11	-5.32e-11	2.47e-11	1.76e-10	4.01e-10	7.75e-10	1.26e-09	0.507525	-9.57e-11	-8.03e-11	-7.1e-11	-7.72e-11	-2.31e-11	3.66e-10	1.43e-09	3.38e-09	6.19e-09	0.507525	-2.98e-10	-3.64e-10	-3.23e-10	-2.67e-10	-6.02e-11	4.75e-10	1.39e-09	2.81e-09	4.67e-09	0.507525	1.38862e-11	7.7198e-12	1.85217e-11	2.77763e-11	4.16692e-11	3.7811e-10	1.33032e-09	3.34275e-09	6.28733e-09
0.50853	-2.46942e-11	2.16009e-11	4.32052e-11	3.24146e-11	4.3226e-11	7.09955e-11	8.48845e-11	1.58951e-10	2.14511e-10	0.50853	-8.63e-11	-9.21e-11	-8.52e-11	-5.72e-11	2.62e-11	1.74e-10	4.08e-10	7.74e-10	1.26e-09	0.50853	-9.72e-11	-8.49e-11	-6.64e-11	-6.94e-11	-2.01e-11	3.63e-10	1.43e-09	3.37e-09	6.18e-09	0.50853	-3.04e-10	-3.53e-10	-3.29e-10	-2.67e-10	-6.02e-11	4.74e-10	1.38e-09	2.81e-09	4.68e-09	0.50853	-3.08037e-12	2.31442e-11	1.54328e-11	2.77802e-11	4.62991e-11	3.82731e-10	1.34111e-09	3.32887e-09	6.29814e-09
0.509535	-3.39415e-11	1.54368e-11	3.24106e-11	2.93241e-11	6.32611e-11	8.33322e-11	8.95116e-11	1.52787e-10	2.0835e-10	0.509535	-6.59e-11	-9.29e-11	-8.13e-11	-5.11e-11	3.43e-11	1.74e-10	4.05e-10	7.86e-10	1.26e-09	0.509535	-9.72e-11	-8.8e-11	-7.56e-11	-6.64e-11	-1.85e-11	3.52e-10	1.42e-09	3.36e-09	6.19e-09	0.509535	-3.13e-10	-3.52e-10	-3.29e-10	-2.75e-10	-7.87e-11	4.8e-10	1.39e-09	2.81e-09	4.67e-09	0.509535	-3.08713e-12	2.46886e-11	1.23451e-11	3.08617e-11	5.24699e-11	3.78103e-10	1.35037e-09	3.33349e-09	6.29969e-09
0.51054	-1.38969e-11	2.00599e-11	2.62369e-11	3.08629e-11	4.63024e-11	8.17963e-11	9.72257e-11	1.52784e-10	2.20679e-10	0.51054	-7.23e-11	-9.01e-11	-8.43e-11	-6.32e-11	2.35e-11	1.77e-10	4.11e-10	7.82e-10	1.27e-09	0.51054	-8.95e-11	-9.11e-11	-6.95e-11	-5.25e-11	-2.16e-11	3.5e-10	1.42e-09	3.36e-09	6.2e-09	0.51054	-3.09e-10	-3.38e-10	-3.49e-10	-2.7e-10	-7.56e-11	4.77e-10	1.39e-09	2.8e-09	4.65e-09	0.51054	-4.63041e-12	1.54385e-11	6.17876e-12	2.31538e-11	5.40183e-11	3.68849e-10	1.35654e-09	3.32732e-09	6.3074e-09
0.511545	-1.38873e-11	1.69784e-11	2.31487e-11	2.46982e-11	4.01304e-11	8.64222e-11	1.01857e-10	1.51242e-10	2.05261e-10	0.511545	-7.12e-11	-8.74e-11	-8.53e-11	-5.83e-11	2.2e-11	1.72e-10	4.03e-10	7.84e-10	1.27e-09	0.511545	-1.02e-10	-9.57e-11	-6.94e-11	-6.02e-11	-6.18e-12	3.5e-10	1.42e-09	3.36e-09	6.19e-09	0.511545	-3.16e-10	-3.27e-10	-3.6e-10	-2.72e-10	-7.25e-11	4.77e-10	1.4e-09	2.81e-09	4.68e-09	0.511545	-7.71135e-12	2.16037e-11	1.5425e-11	2.77763e-11	6.48111e-11	3.71932e-10	1.35809e-09	3.33503e-09	6.31203e-09
0.51255	-7.71585e-12	2.00616e-11	1.85171e-11	3.39449e-11	4.78418e-11	8.64261e-11	1.08027e-10	1.49695e-10	2.0063e-10	0.51255	-6.48e-11	-9.21e-11	-8.57e-11	-5.72e-11	3.16e-11	1.73e-10	4.04e-10	7.8e-10	1.26e-09	0.51255	-8.49e-11	-8.49e-11	-7.25e-11	-5.86e-11	-6.17e-12	3.49e-10	1.42e-09	3.38e-09	6.2e-09	0.51255	-3.29e-10	-3.19e-10	-3.64e-10	-2.62e-10	-8.33e-11	4.82e-10	1.39e-09	2.78e-09	4.68e-09	0.51255	3.08206e-12	2.16077e-11	3.09445e-12	2.46948e-11	5.71077e-11	3.78097e-10	1.37197e-09	3.33041e-09	6.329e-09
0.513555	0	2.00576e-11	7.72205e-12	2.3156e-11	5.55554e-11	9.25959e-11	1.0649e-10	1.38898e-10	2.03713e-10	0.513555	-7.35e-11	-8.98e-11	-8.35e-11	-6.33e-11	2.21e-11	1.82e-10	4.03e-10	7.82e-10	1.26e-09	0.513555	-7.56e-11	-8.64e-11	-8.8e-11	-6.33e-11	1.54e-12	3.5e-10	1.42e-09	3.38e-09	6.2e-09	0.513555	-3.33e-10	-3.32e-10	-3.7e-10	-2.7e-10	-6.17e-11	4.82e-10	1.4e-09	2.78e-09	4.69e-09	0.513555	1.54103e-12	2.62392e-11	1.23435e-11	2.77752e-11	6.63556e-11	3.6268e-10	1.36581e-09	3.33658e-09	6.31976e-09
0.51456	7.71304e-12	6.1782e-12	1.23457e-11	3.08612e-11	5.55571e-11	9.56802e-11	1.14201e-10	1.34266e-10	2.06792e-10	0.51456	-7.74e-11	-9.7e-11	-7.95e-11	-5.83e-11	3.37e-11	1.74e-10	4.05e-10	7.8e-10	1.27e-09	0.51456	-7.41e-11	-8.18e-11	-8.64e-11	-6.79e-11	1.69e-15	3.61e-10	1.42e-09	3.4e-09	6.2e-09	0.51456	-3.49e-10	-3.32e-10	-3.66e-10	-2.92e-10	-7.1e-11	4.85e-10	1.41e-09	2.78e-09	4.68e-09	0.51456	-6.16469e-12	4.01197e-11	1.38941e-11	2.00621e-11	6.01937e-11	3.70384e-10	1.37043e-09	3.34275e-09	6.3398e-09
0.515565	6.17088e-12	6.16976e-12	1.54289e-11	2.62409e-11	5.24756e-11	8.95155e-11	1.15744e-10	1.31181e-10	1.88287e-10	0.515565	-7.13e-11	-8.62e-11	-9.14e-11	-5.96e-11	2.2e-11	1.72e-10	4e-10	7.72e-10	1.26e-09	0.515565	-6.94e-11	-7.1e-11	-8.64e-11	-7.1e-11	3.08e-12	3.55e-10	1.42e-09	3.37e-09	6.21e-09	0.515565	-3.46e-10	-3.21e-10	-3.7e-10	-2.93e-10	-6.48e-11	4.61e-10	1.4e-09	2.79e-09	4.66e-09	0.515565	9.25294e-12	3.85787e-11	2.77707e-11	1.08064e-11	6.94427e-11	3.67304e-10	1.37198e-09	3.34893e-09	6.33363e-09
0.51657	-1.53878e-12	-3.0815e-12	7.72036e-12	3.54966e-11	6.01864e-11	9.72235e-11	1.1112e-10	1.3272e-10	1.88279e-10	0.51657	-6.97e-11	-9.54e-11	-8.16e-11	-5.03e-11	2.58e-11	1.75e-10	4.06e-10	7.74e-10	1.26e-09	0.51657	-5.71e-11	-7.25e-11	-9.57e-11	-7.1e-11	-1.54e-12	3.69e-10	1.42e-09	3.36e-09	6.21e-09	0.51657	-3.36e-10	-3.35e-10	-3.61e-10	-2.84e-10	-5.71e-11	4.72e-10	1.41e-09	2.79e-09	4.65e-09	0.51657	6.18045e-12	2.77847e-11	1.8529e-11	1.08035e-11	6.48207e-11	3.71931e-10	1.36581e-09	3.3551e-09	6.32284e-09
0.517575	3.08375e-12	1.53653e-12	1.0803e-11	4.78378e-11	6.32735e-11	9.56813e-11	1.15743e-10	1.26549e-10	1.83652e-10	0.517575	-7.86e-11	-9.36e-11	-9.51e-11	-5.78e-11	2.47e-11	1.76e-10	4.05e-10	7.69e-10	1.28e-09	0.517575	-6.79e-11	-6.64e-11	-9.41e-11	-8.33e-11	1.54e-11	3.66e-10	1.41e-09	3.36e-09	6.21e-09	0.517575	-3.36e-10	-3.36e-10	-3.53e-10	-3.07e-10	-4.48e-11	4.75e-10	1.41e-09	2.79e-09	4.65e-09	0.517575	2.31442e-11	3.24056e-11	3.54921e-11	1.23446e-11	6.79005e-11	3.75015e-10	1.36426e-09	3.35973e-09	6.33055e-09
0.51858	2.25211e-15	-1.23406e-11	1.38873e-11	4.93845e-11	6.32774e-11	8.79694e-11	1.1266e-10	1.20377e-10	1.83647e-10	0.51858	-7.37e-11	-8.78e-11	-8.39e-11	-5.41e-11	2.65e-11	1.82e-10	3.99e-10	7.69e-10	1.26e-09	0.51858	-5.87e-11	-5.86e-11	-9.88e-11	-8.33e-11	7.72e-12	3.73e-10	1.41e-09	3.33e-09	6.2e-09	0.51858	-3.18e-10	-3.41e-10	-3.47e-10	-2.92e-10	-4.63e-11	4.55e-10	1.41e-09	2.78e-09	4.65e-09	0.51858	2.62313e-11	2.77791e-11	4.32046e-11	9.2552e-12	6.01897e-11	3.70395e-10	1.36426e-09	3.36899e-09	6.3398e-09
0.519585	3.08319e-12	-1.08041e-11	1.08114e-11	4.93856e-11	7.09905e-11	8.64222e-11	1.11113e-10	1.15749e-10	1.74397e-10	0.519585	-7.52e-11	-9.32e-11	-8.94e-11	-5.29e-11	3.36e-11	1.72e-10	4.13e-10	7.74e-10	1.27e-09	0.519585	-7.56e-11	-5.71e-11	-9.26e-11	-9.11e-11	6.17e-12	3.69e-10	1.41e-09	3.34e-09	6.2e-09	0.519585	-3.19e-10	-3.41e-10	-3.38e-10	-3.1e-10	-4.78e-11	4.51e-10	1.41e-09	2.79e-09	4.67e-09	0.519585	1.69812e-11	2.31493e-11	3.0873e-11	-6.16244e-12	5.71021e-11	3.84275e-10	1.36735e-09	3.38596e-09	6.3213e-09
0.52059	-3.08826e-12	-1.23451e-11	3.08544e-11	5.09295e-11	7.71597e-11	8.02513e-11	1.00319e-10	1.18835e-10	1.80561e-10	0.52059	-6.9e-11	-9.62e-11	-8.33e-11	-5.03e-11	2.73e-11	1.74e-10	4.15e-10	7.69e-10	1.28e-09	0.52059	-6.94e-11	-6.64e-11	-8.95e-11	-9.11e-11	1.54e-12	3.75e-10	1.43e-09	3.36e-09	6.21e-09	0.52059	-3.13e-10	-3.41e-10	-3.3e-10	-2.99e-10	-4.63e-11	4.51e-10	1.41e-09	2.81e-09	4.67e-09	0.52059	2.1606e-11	1.85183e-11	3.85793e-11	7.70966e-12	5.5556e-11	3.91992e-10	1.35964e-09	3.39522e-09	6.33826e-09
0.521595	-1.3885e-11	-1.08002e-11	2.007e-11	5.55565e-11	7.09933e-11	7.56192e-11	1.04937e-10	1.28091e-10	1.77479e-10	0.521595	-7.5e-11	-8.83e-11	-9.62e-11	-4.93e-11	2.43e-11	1.76e-10	4.09e-10	7.68e-10	1.26e-09	0.521595	-6.17e-11	-5.86e-11	-8.18e-11	-9.26e-11	-1.54e-12	3.73e-10	1.43e-09	3.37e-09	6.22e-09	0.521595	-2.95e-10	-3.46e-10	-3.29e-10	-2.98e-10	-4.48e-11	4.52e-10	1.39e-09	2.8e-09	4.7e-09	0.521595	2.62341e-11	1.08064e-11	3.85804e-11	3.09163e-12	4.78446e-11	3.95078e-10	1.3658e-09	3.39831e-09	6.35061e-09
0.5226	-1.23491e-11	-1.54779e-12	2.93218e-11	5.5561e-11	7.09922e-11	6.6364e-11	9.10588e-11	1.34261e-10	1.79025e-10	0.5226	-6.5e-11	-8.42e-11	-8.16e-11	-5.5e-11	2.69e-11	1.79e-10	4.08e-10	7.71e-10	1.27e-09	0.5226	-7.41e-11	-6.33e-11	-7.72e-11	-1e-10	-5.07e-15	3.84e-10	1.43e-09	3.37e-09	6.22e-09	0.5226	-2.99e-10	-3.55e-10	-3.38e-10	-2.96e-10	-4.48e-11	4.6e-10	1.4e-09	2.8e-09	4.68e-09	0.5226	2.62375e-11	1.23446e-11	3.39551e-11	1.23435e-11	4.7844e-11	3.91997e-10	1.35347e-09	3.39677e-09	6.3645e-09
0.523605	-1.85183e-11	-4.62478e-12	3.7036e-11	6.32662e-11	7.40737e-11	6.48207e-11	9.10532e-11	1.26559e-10	1.92908e-10	0.523605	-7.52e-11	-8.84e-11	-8.44e-11	-5.94e-11	2.72e-11	1.77e-10	4.18e-10	7.79e-10	1.27e-09	0.523605	-7.1e-11	-4.94e-11	-8.33e-11	-9.41e-11	-1.23e-11	3.8e-10	1.42e-09	3.34e-09	6.22e-09	0.523605	-2.92e-10	-3.58e-10	-3.21e-10	-2.81e-10	-3.24e-11	4.57e-10	1.39e-09	2.81e-09	4.67e-09	0.523605	3.08606e-11	9.26139e-12	3.70382e-11	1.3885e-11	5.40076e-11	3.98164e-10	1.36271e-09	3.40448e-09	6.37067e-09
0.52461	-2.16037e-11	6.16863e-12	3.70394e-11	4.78485e-11	6.63629e-11	7.0986e-11	8.95076e-11	1.45062e-10	1.99082e-10	0.52461	-7.12e-11	-1.03e-10	-1.02e-10	-5.01e-11	2.49e-11	1.75e-10	4.13e-10	7.88e-10	1.28e-09	0.52461	-7.56e-11	-6.02e-11	-6.02e-11	-9.88e-11	-9.26e-12	3.72e-10	1.44e-09	3.34e-09	6.2e-09	0.52461	-2.99e-10	-3.61e-10	-3.24e-10	-2.75e-10	-4.63e-11	4.75e-10	1.39e-09	2.8e-09	4.67e-09	0.52461	2.16071e-11	1.08041e-11	3.85804e-11	3.08995e-12	4.01299e-11	3.95083e-10	1.34729e-09	3.39677e-09	6.37839e-09
0.525615	-1.85211e-11	4.63492e-12	3.85815e-11	5.09261e-11	6.32763e-11	6.32774e-11	8.02536e-11	1.4507e-10	2.02171e-10	0.525615	-7.11e-11	-9.75e-11	-9.28e-11	-5.31e-11	2.73e-11	1.73e-10	4.07e-10	7.76e-10	1.27e-09	0.525615	-7.72e-11	-7.41e-11	-5.71e-11	-9.41e-11	-1.85e-11	3.67e-10	1.45e-09	3.36e-09	6.23e-09	0.525615	-2.93e-10	-3.7e-10	-3.29e-10	-2.76e-10	-4.94e-11	4.78e-10	1.38e-09	2.82e-09	4.68e-09	0.525615	1.54373e-11	1.54283e-11	3.5495e-11	1.54948e-12	3.85832e-11	3.99708e-10	1.355e-09	3.40756e-09	6.39383e-09
0.52662	-2.00649e-11	1.69722e-11	3.85821e-11	4.78395e-11	6.48128e-11	6.32763e-11	7.87125e-11	1.48156e-10	2.06798e-10	0.52662	-8.33e-11	-9.04e-11	-9.2e-11	-5.77e-11	2.97e-11	1.67e-10	4.08e-10	7.81e-10	1.27e-09	0.52662	-9.26e-11	-7.41e-11	-6.02e-11	-8.8e-11	-2.01e-11	3.64e-10	1.44e-09	3.38e-09	6.21e-09	0.52662	-2.86e-10	-3.72e-10	-3.36e-10	-2.67e-10	-5.56e-11	4.75e-10	1.39e-09	2.83e-09	4.69e-09	0.52662	2.15986e-11	7.7243e-12	3.08623e-11	1.69727e-11	4.01254e-11	3.96621e-10	1.36272e-09	3.39678e-09	6.41234e-09
0.527625	-2.7774e-11	1.85155e-11	3.85798e-11	3.85877e-11	5.2475e-11	6.79039e-11	9.10453e-11	1.52783e-10	2.05258e-10	0.527625	-7.68e-11	-9.1e-11	-8.62e-11	-6.06e-11	3.08e-11	1.68e-10	4.1e-10	7.87e-10	1.28e-09	0.527625	-8.33e-11	-7.72e-11	-6.33e-11	-8.33e-11	-1.85e-11	3.53e-10	1.45e-09	3.38e-09	6.23e-09	0.527625	-2.96e-10	-3.52e-10	-3.38e-10	-2.7e-10	-6.48e-11	4.83e-10	1.39e-09	2.81e-09	4.67e-09	0.527625	7.72036e-12	2.16015e-11	1.69812e-11	2.3147e-11	4.16703e-11	3.85825e-10	1.36117e-09	3.40911e-09	6.42314e-09
0.52863	-2.16065e-11	9.26646e-12	3.24123e-11	4.47502e-11	4.93873e-11	7.09944e-11	8.02558e-11	1.51244e-10	2.08341e-10	0.52863	-7.37e-11	-8.9e-11	-9.29e-11	-5.63e-11	2.44e-11	1.77e-10	4.05e-10	7.88e-10	1.27e-09	0.52863	-1.05e-10	-8.33e-11	-6.64e-11	-7.41e-11	-1.85e-11	3.67e-10	1.44e-09	3.39e-09	6.24e-09	0.52863	-2.98e-10	-3.55e-10	-3.24e-10	-2.69e-10	-6.17e-11	4.77e-10	1.38e-09	2.82e-09	4.7e-09	0.52863	4.62872e-12	2.31481e-11	1.69744e-11	2.31509e-11	4.78429e-11	3.8582e-10	1.35501e-09	3.4014e-09	6.43087e-09
0.529635	-1.69772e-11	1.85183e-11	3.54921e-11	3.70394e-11	5.24683e-11	8.33328e-11	8.33396e-11	1.55867e-10	2.05261e-10	0.529635	-7.66e-11	-8.74e-11	-8.61e-11	-6.65e-11	2.35e-11	1.7e-10	4.12e-10	7.81e-10	1.27e-09	0.529635	-9.57e-11	-9.26e-11	-7.41e-11	-6.17e-11	-1.54e-11	3.52e-10	1.44e-09	3.41e-09	6.25e-09	0.529635	-3.06e-10	-3.41e-10	-3.4e-10	-2.72e-10	-6.94e-11	4.82e-10	1.4e-09	2.81e-09	4.67e-09	0.529635	-1.54272e-12	2.16054e-11	1.23468e-11	2.77774e-11	5.7097e-11	3.82734e-10	1.37198e-09	3.39985e-09	6.44629e-09
0.53064	-1.5434e-11	2.46841e-11	2.93235e-11	3.08657e-11	4.63002e-11	8.33407e-11	9.25959e-11	1.48157e-10	2.1451e-10	0.53064	-8.09e-11	-8.47e-11	-8.91e-11	-5.81e-11	3.59e-11	1.75e-10	4.11e-10	7.88e-10	1.27e-09	0.53064	-9.26e-11	-8.64e-11	-6.48e-11	-6.02e-11	-1.7e-11	3.6e-10	1.43e-09	3.39e-09	6.26e-09	0.53064	-3.06e-10	-3.27e-10	-3.49e-10	-2.72e-10	-8.02e-11	4.85e-10	1.39e-09	2.8e-09	4.7e-09	0.53064	-6.17257e-12	1.85245e-11	9.26195e-12	2.77819e-11	5.40183e-11	3.79647e-10	1.37815e-09	3.40139e-09	6.45093e-09
0.531645	-1.69682e-11	7.72768e-12	2.62336e-11	2.46959e-11	4.47547e-11	9.25942e-11	9.8769e-11	1.45068e-10	2.06805e-10	0.531645	-7.2e-11	-8.53e-11	-9.22e-11	-5.94e-11	3.72e-11	1.79e-10	4.01e-10	7.84e-10	1.28e-09	0.531645	-8.95e-11	-8.95e-11	-8.33e-11	-6.02e-11	-1.55e-12	3.52e-10	1.43e-09	3.41e-09	6.27e-09	0.531645	-3.21e-10	-3.32e-10	-3.6e-10	-2.69e-10	-7.56e-11	4.86e-10	1.39e-09	2.8e-09	4.72e-09	0.531645	-9.25745e-12	2.93218e-11	1.23451e-11	3.54899e-11	6.01886e-11	3.73479e-10	1.37353e-09	3.39676e-09	6.46327e-09
0.53265	3.07587e-12	2.16015e-11	1.69801e-11	2.77785e-11	4.16709e-11	9.41386e-11	1.01856e-10	1.40441e-10	2.11426e-10	0.53265	-7.33e-11	-8.85e-11	-8.66e-11	-5.71e-11	3.13e-11	1.77e-10	4.05e-10	7.89e-10	1.28e-09	0.53265	-8.33e-11	-8.8e-11	-8.49e-11	-6.64e-11	1.54e-12	3.58e-10	1.42e-09	3.41e-09	6.26e-09	0.53265	-3.29e-10	-3.38e-10	-3.7e-10	-2.79e-10	-6.64e-11	5e-10	1.39e-09	2.81e-09	4.69e-09	0.53265	-6.1737e-12	3.85793e-11	1.23451e-11	2.77797e-11	6.78994e-11	3.79642e-10	1.38432e-09	3.38597e-09	6.47098e-09
0.533655	-6.16469e-12	2.31436e-11	1.8516e-11	2.93224e-11	4.47586e-11	9.10571e-11	1.03401e-10	1.41981e-10	2.06801e-10	0.533655	-8.33e-11	-8.19e-11	-9.33e-11	-6.19e-11	2.95e-11	1.7e-10	4.06e-10	7.83e-10	1.28e-09	0.533655	-7.72e-11	-8.33e-11	-8.33e-11	-5.71e-11	2.25e-15	3.66e-10	1.42e-09	3.39e-09	6.29e-09	0.533655	-3.21e-10	-3.24e-10	-3.77e-10	-2.78e-10	-6.48e-11	4.75e-10	1.41e-09	2.8e-09	4.71e-09	0.533655	-4.63267e-12	4.01248e-11	9.26364e-12	2.1606e-11	6.17392e-11	3.6885e-10	1.39358e-09	3.39984e-09	6.46636e-09
0.53466	7.71135e-12	9.26477e-12	1.08052e-11	3.08668e-11	5.70964e-11	9.72229e-11	1.08032e-10	1.40437e-10	2.05257e-10	0.53466	-8.11e-11	-9.23e-11	-8.91e-11	-5.9e-11	3.04e-11	1.68e-10	4.02e-10	7.86e-10	1.29e-09	0.53466	-6.79e-11	-7.72e-11	-8.49e-11	-6.94e-11	4.63e-12	3.7e-10	1.41e-09	3.4e-09	6.25e-09	0.53466	-3.46e-10	-3.21e-10	-3.72e-10	-2.95e-10	-6.64e-11	4.78e-10	1.41e-09	2.78e-09	4.71e-09	0.53466	-1.07968e-11	4.01226e-11	1.69767e-11	1.54345e-11	7.71574e-11	3.71928e-10	1.38588e-09	3.38906e-09	6.48024e-09
0.535665	7.71417e-12	9.25576e-12	9.2597e-12	3.54944e-11	5.55605e-11	9.25976e-11	1.17288e-10	1.32721e-10	2.0525e-10	0.535665	-7.38e-11	-8.72e-11	-8.63e-11	-5.03e-11	2.5e-11	1.74e-10	4.04e-10	7.91e-10	1.28e-09	0.535665	-6.02e-11	-7.56e-11	-1e-10	-6.48e-11	9.26e-12	3.69e-10	1.41e-09	3.41e-09	6.27e-09	0.535665	-3.35e-10	-3.29e-10	-3.73e-10	-2.9e-10	-5.25e-11	4.78e-10	1.42e-09	2.79e-09	4.68e-09	0.535665	-3.37817e-15	3.24135e-11	2.62319e-11	1.38879e-11	7.40776e-11	3.65762e-10	1.4013e-09	3.39985e-09	6.48641e-09
0.53667	1.54385e-12	-1.53934e-12	7.71754e-12	3.70388e-11	6.01881e-11	8.9511e-11	1.21914e-10	1.21922e-10	1.86747e-10	0.53667	-7.41e-11	-8.55e-11	-8.26e-11	-5.4e-11	3.8e-11	1.7e-10	4e-10	7.93e-10	1.28e-09	0.53667	-6.48e-11	-6.79e-11	-1.02e-10	-6.79e-11	6.17e-12	3.75e-10	1.42e-09	3.41e-09	6.27e-09	0.53667	-3.35e-10	-3.35e-10	-3.77e-10	-3.02e-10	-5.09e-11	4.72e-10	1.42e-09	2.8e-09	4.68e-09	0.53667	1.54441e-12	3.70343e-11	2.46954e-11	7.71698e-12	7.09899e-11	3.68847e-10	1.41055e-09	3.40757e-09	6.47408e-09
0.537675	-3.08319e-12	-1.54666e-12	9.26083e-12	3.8586e-11	6.48157e-11	8.79672e-11	1.12666e-10	1.17293e-10	1.95989e-10	0.537675	-7.73e-11	-9.56e-11	-8.56e-11	-6.35e-11	2.31e-11	1.75e-10	4.12e-10	7.82e-10	1.28e-09	0.537675	-6.79e-11	-7.1e-11	-9.57e-11	-8.18e-11	4.63e-12	3.7e-10	1.42e-09	3.39e-09	6.27e-09	0.537675	-3.32e-10	-3.18e-10	-3.67e-10	-3.02e-10	-4.48e-11	4.55e-10	1.42e-09	2.8e-09	4.7e-09	0.537675	6.17426e-12	2.9323e-11	3.08645e-11	3.08826e-12	6.48202e-11	3.78103e-10	1.39976e-09	3.40912e-09	6.48487e-09
0.53868	1.53934e-12	-1.07979e-11	1.38896e-11	5.09239e-11	6.32786e-11	8.64205e-11	1.20367e-10	1.21918e-10	1.82111e-10	0.53868	-7.3e-11	-8.75e-11	-8.82e-11	-5.39e-11	2.66e-11	1.63e-10	4.1e-10	7.83e-10	1.28e-09	0.53868	-5.86e-11	-6.79e-11	-9.26e-11	-8.49e-11	-1.54e-12	3.8e-10	1.41e-09	3.38e-09	6.27e-09	0.53868	-3.36e-10	-3.36e-10	-3.58e-10	-2.98e-10	-4.48e-11	4.57e-10	1.41e-09	2.81e-09	4.72e-09	0.53868	1.38867e-11	2.31504e-11	3.39534e-11	3.08431e-12	6.48157e-11	3.82733e-10	1.3905e-09	3.42146e-09	6.47254e-09
0.539685	-4.62704e-12	-6.17708e-12	1.852e-11	5.09306e-11	7.25321e-11	7.5626e-11	1.03406e-10	1.23462e-10	1.79021e-10	0.539685	-7.95e-11	-8.93e-11	-9.03e-11	-5.59e-11	2.32e-11	1.78e-10	4.26e-10	7.89e-10	1.28e-09	0.539685	-5.71e-11	-6.48e-11	-8.49e-11	-8.49e-11	9.25e-12	3.87e-10	1.43e-09	3.38e-09	6.26e-09	0.539685	-2.99e-10	-3.32e-10	-3.5e-10	-2.95e-10	-4.01e-11	4.58e-10	1.42e-09	2.82e-09	4.69e-09	0.539685	1.38918e-11	2.00649e-11	4.01197e-11	-3.08375e-12	5.86453e-11	3.84282e-10	1.38896e-09	3.43226e-09	6.48178e-09
0.54069	-3.09163e-12	-1.23412e-11	2.46931e-11	5.71009e-11	7.56186e-11	7.87063e-11	1.01858e-10	1.21922e-10	1.77482e-10	0.54069	-7.2e-11	-8.6e-11	-8.69e-11	-5.95e-11	2.79e-11	1.74e-10	4.03e-10	7.83e-10	1.28e-09	0.54069	-6.48e-11	-5.86e-11	-8.18e-11	-8.64e-11	0	3.86e-10	1.41e-09	3.38e-09	6.26e-09	0.54069	-3.16e-10	-3.44e-10	-3.33e-10	-3.04e-10	-4.17e-11	4.68e-10	1.4e-09	2.82e-09	4.71e-09	0.54069	2.00571e-11	2.31447e-11	3.08758e-11	-1.54103e-12	5.40138e-11	3.96614e-10	1.38896e-09	3.42918e-09	6.47562e-09
0.541695	-1.54278e-11	-4.63267e-12	3.24078e-11	6.17268e-11	7.25354e-11	7.87018e-11	1.03395e-10	1.26546e-10	1.88275e-10	0.541695	-6.61e-11	-8.57e-11	-8.72e-11	-5.49e-11	2.34e-11	1.74e-10	4.11e-10	7.81e-10	1.29e-09	0.541695	-6.17e-11	-6.33e-11	-7.72e-11	-9.88e-11	-9.25e-12	3.84e-10	1.42e-09	3.39e-09	6.26e-09	0.541695	-2.9e-10	-3.61e-10	-3.4e-10	-2.92e-10	-3.7e-11	4.52e-10	1.41e-09	2.82e-09	4.69e-09	0.541695	1.08058e-11	1.38929e-11	4.93732e-11	6.16694e-12	4.63002e-11	3.82743e-10	1.38896e-09	3.43381e-09	6.47871e-09
0.5427	-1.38952e-11	-4.63041e-12	3.70354e-11	5.40177e-11	7.25354e-11	6.32842e-11	9.10599e-11	1.23469e-10	1.83657e-10	0.5427	-7.31e-11	-8.89e-11	-9.36e-11	-6.19e-11	2.46e-11	1.75e-10	4.21e-10	7.82e-10	1.29e-09	0.5427	-6.94e-11	-5.86e-11	-7.56e-11	-8.8e-11	-4.64e-12	3.9e-10	1.44e-09	3.37e-09	6.22e-09	0.5427	-2.99e-10	-3.4e-10	-3.36e-10	-2.92e-10	-4.63e-11	4.63e-10	1.41e-09	2.82e-09	4.7e-09	0.5427	9.26308e-12	1.38884e-11	3.55017e-11	-3.08319e-12	4.32125e-11	3.91993e-10	1.3905e-09	3.44923e-09	6.48642e-09
0.543705	-2.77712e-11	-6.16976e-12	3.24129e-11	5.40177e-11	7.56186e-11	7.40692e-11	9.56825e-11	1.3889e-10	1.97537e-10	0.543705	-7.67e-11	-8.78e-11	-8.96e-11	-5.98e-11	3.26e-11	1.74e-10	4.06e-10	7.82e-10	1.28e-09	0.543705	-7.56e-11	-6.02e-11	-7.1e-11	-9.11e-11	-1.85e-11	3.89e-10	1.46e-09	3.39e-09	6.23e-09	0.543705	-3.01e-10	-3.67e-10	-3.32e-10	-2.93e-10	-4.78e-11	4.61e-10	1.4e-09	2.83e-09	4.69e-09	0.543705	1.69744e-11	1.08041e-11	3.8581e-11	-3.08094e-12	4.16658e-11	3.99708e-10	1.39204e-09	3.44924e-09	6.49568e-09
0.54471	-2.00666e-11	1.54328e-12	3.8581e-11	6.17263e-11	7.25338e-11	6.17364e-11	9.72207e-11	1.38898e-10	2.02171e-10	0.54471	-6.63e-11	-8.41e-11	-9.5e-11	-6.08e-11	2.69e-11	1.77e-10	4.16e-10	7.85e-10	1.29e-09	0.54471	-8.49e-11	-6.17e-11	-6.64e-11	-9.1e-11	-1.7e-11	3.77e-10	1.46e-09	3.39e-09	6.25e-09	0.54471	-2.9e-10	-3.7e-10	-3.15e-10	-2.7e-10	-5.4e-11	4.66e-10	1.38e-09	2.82e-09	4.69e-09	0.54471	2.00576e-11	1.08002e-11	3.85793e-11	1.23412e-11	3.24157e-11	4.01251e-10	1.38587e-09	3.46621e-09	6.49877e-09
0.545715	-2.31515e-11	9.25914e-12	4.16675e-11	5.55599e-11	6.79062e-11	6.32741e-11	8.17997e-11	1.45069e-10	2.09882e-10	0.545715	-6.62e-11	-8.32e-11	-8.56e-11	-5.43e-11	3.06e-11	1.74e-10	4.13e-10	7.86e-10	1.29e-09	0.545715	-7.41e-11	-7.1e-11	-6.64e-11	-8.03e-11	-2.47e-11	3.72e-10	1.45e-09	3.39e-09	6.26e-09	0.545715	-3.09e-10	-3.73e-10	-3.21e-10	-2.79e-10	-5.56e-11	4.81e-10	1.38e-09	2.84e-09	4.7e-09	0.545715	9.2642e-12	3.0922e-12	3.08679e-11	1.38901e-11	4.16658e-11	3.96624e-10	1.3797e-09	3.46159e-09	6.5034e-09
0.54672	-3.24061e-11	1.54289e-11	4.16653e-11	5.40138e-11	6.78994e-11	6.32735e-11	8.17968e-11	1.51241e-10	2.05262e-10	0.54672	-6.62e-11	-9.28e-11	-8.66e-11	-5.56e-11	2.51e-11	1.79e-10	4.11e-10	7.85e-10	1.29e-09	0.54672	-9.26e-11	-7.72e-11	-6.33e-11	-8.03e-11	-2.16e-11	3.64e-10	1.44e-09	3.41e-09	6.23e-09	0.54672	-3.06e-10	-3.57e-10	-3.19e-10	-2.7e-10	-5.25e-11	4.82e-10	1.38e-09	2.84e-09	4.69e-09	0.54672	1.08013e-11	1.07996e-11	2.9319e-11	1.69795e-11	4.32114e-11	3.93539e-10	1.38432e-09	3.46159e-09	6.50495e-09
0.547725	-3.39483e-11	1.08092e-11	3.24157e-11	4.93817e-11	5.40189e-11	6.01971e-11	8.95065e-11	1.55869e-10	2.14512e-10	0.547725	-7.06e-11	-8.65e-11	-7.98e-11	-6.6e-11	3.06e-11	1.66e-10	4.07e-10	7.82e-10	1.29e-09	0.547725	-8.18e-11	-7.1e-11	-6.33e-11	-8.95e-11	-2.31e-11	3.67e-10	1.45e-09	3.44e-09	6.26e-09	0.547725	-3.09e-10	-3.52e-10	-3.24e-10	-2.69e-10	-5.86e-11	4.77e-10	1.4e-09	2.84e-09	4.67e-09	0.547725	7.71585e-12	9.26252e-12	1.85217e-11	2.93196e-11	4.32153e-11	3.95077e-10	1.38124e-09	3.46929e-09	6.52654e-09
0.54873	-2.46937e-11	2.31453e-11	4.16596e-11	3.55006e-11	5.09295e-11	8.17839e-11	8.64239e-11	1.52786e-10	2.12974e-10	0.54873	-6.26e-11	-8.39e-11	-8.98e-11	-6.29e-11	3.03e-11	1.75e-10	4.08e-10	7.86e-10	1.3e-09	0.54873	-9.88e-11	-8.33e-11	-6.33e-11	-6.95e-11	-1.54e-11	3.61e-10	1.45e-09	3.42e-09	6.26e-09	0.54873	-3.09e-10	-3.44e-10	-3.36e-10	-2.72e-10	-6.64e-11	4.83e-10	1.4e-09	2.83e-09	4.68e-09	0.54873	3.08657e-12	1.54306e-11	1.38907e-11	3.39472e-11	5.2466e-11	3.87364e-10	1.38896e-09	3.45388e-09	6.52964e-09
0.549735	-1.85205e-11	2.4692e-11	2.62426e-11	3.5495e-11	5.0925e-11	7.56243e-11	8.33424e-11	1.52784e-10	2.12975e-10	0.549735	-7.58e-11	-9.27e-11	-9.08e-11	-6.1e-11	2.91e-11	1.8e-10	4.14e-10	7.88e-10	1.29e-09	0.549735	-9.57e-11	-8.33e-11	-6.79e-11	-7.41e-11	-1.7e-11	3.47e-10	1.44e-09	3.42e-09	6.29e-09	0.549735	-3.15e-10	-3.46e-10	-3.41e-10	-2.67e-10	-7.1e-11	4.85e-10	1.39e-09	2.83e-09	4.68e-09	0.549735	-1.54497e-12	1.54385e-11	1.2344e-11	2.46993e-11	4.6307e-11	3.79653e-10	1.39821e-09	3.46004e-09	6.54043e-09
0.55074	-1.54306e-11	2.46863e-11	2.93168e-11	3.395e-11	4.16737e-11	7.87108e-11	9.41352e-11	1.49699e-10	2.19143e-10	0.55074	-7.17e-11	-8.2e-11	-8.91e-11	-5.9e-11	3.05e-11	1.74e-10	4.11e-10	7.97e-10	1.29e-09	0.55074	-9.41e-11	-8.64e-11	-7.72e-11	-6.48e-11	-1.23e-11	3.52e-10	1.44e-09	3.43e-09	6.28e-09	0.55074	-3.29e-10	-3.46e-10	-3.53e-10	-2.69e-10	-7.56e-11	4.85e-10	1.4e-09	2.82e-09	4.7e-09	0.55074	-1.07968e-11	3.08595e-11	4.63435e-12	3.39472e-11	6.32667e-11	3.85815e-10	1.40285e-09	3.46004e-09	6.54661e-09
0.551745	-6.17876e-12	7.72599e-12	1.69795e-11	2.62364e-11	4.62968e-11	9.10515e-11	9.1061e-11	1.48153e-10	2.17599e-10	0.551745	-7.13e-11	-8.42e-11	-1e-10	-5.76e-11	2.59e-11	1.77e-10	4.18e-10	7.97e-10	1.31e-09	0.551745	-9.11e-11	-8.33e-11	-8.18e-11	-6.48e-11	-1.23e-11	3.55e-10	1.42e-09	3.44e-09	6.29e-09	0.551745	-3.35e-10	-3.24e-10	-3.56e-10	-2.7e-10	-6.64e-11	4.88e-10	1.4e-09	2.79e-09	4.72e-09	0.551745	-3.08769e-12	2.93241e-11	9.25689e-12	2.93201e-11	5.86476e-11	3.75023e-10	1.41364e-09	3.46621e-09	6.55741e-09
0.55275	-1.23401e-11	1.69716e-11	1.38901e-11	2.00683e-11	4.62979e-11	9.72218e-11	1.08025e-10	1.40442e-10	2.05267e-10	0.55275	-6.58e-11	-9.17e-11	-9.12e-11	-6e-11	2.94e-11	1.83e-10	4.11e-10	7.9e-10	1.3e-09	0.55275	-9.1e-11	-8.8e-11	-8.18e-11	-6.48e-11	-5.07e-15	3.5e-10	1.43e-09	3.41e-09	6.28e-09	0.55275	-3.36e-10	-3.21e-10	-3.55e-10	-2.75e-10	-7.1e-11	4.83e-10	1.41e-09	2.81e-09	4.73e-09	0.55275	1.53878e-12	3.24118e-11	6.17539e-12	1.85267e-11	6.17302e-11	3.78102e-10	1.41056e-09	3.46467e-09	6.57438e-09
0.553755	-1.54835e-12	1.38907e-11	1.23451e-11	2.9319e-11	4.4758e-11	8.95144e-11	1.11115e-10	1.40437e-10	2.20679e-10	0.553755	-7.1e-11	-8.61e-11	-9.29e-11	-6.21e-11	2.92e-11	1.78e-10	4.07e-10	7.75e-10	1.3e-09	0.553755	-7.72e-11	-8.8e-11	-8.49e-11	-6.33e-11	-1.54e-12	3.46e-10	1.41e-09	3.41e-09	6.31e-09	0.553755	-3.4e-10	-3.21e-10	-3.73e-10	-2.75e-10	-7.1e-11	4.82e-10	1.41e-09	2.79e-09	4.71e-09	0.553755	-6.16919e-12	4.32057e-11	9.26364e-12	2.7774e-11	6.17325e-11	3.75014e-10	1.41056e-09	3.45696e-09	6.57747e-09
0.55476	-4.62366e-12	1.38884e-11	7.71417e-12	2.93246e-11	5.093e-11	9.25981e-11	1.09575e-10	1.34265e-10	2.06807e-10	0.55476	-7.04e-11	-9.16e-11	-9.67e-11	-6.09e-11	2.87e-11	1.7e-10	4.11e-10	7.88e-10	1.29e-09	0.55476	-7.41e-11	-7.56e-11	-9.88e-11	-6.64e-11	1.08e-11	3.52e-10	1.43e-09	3.4e-09	6.33e-09	0.55476	-3.46e-10	-3.13e-10	-3.63e-10	-2.87e-10	-6.17e-11	4.72e-10	1.41e-09	2.81e-09	4.73e-09	0.55476	-3.08544e-12	3.70416e-11	2.31442e-11	2.31476e-11	6.48168e-11	3.6114e-10	1.41982e-09	3.46313e-09	6.57902e-09
0.555765	9.25463e-12	1.0799e-11	-3.07587e-12	3.54966e-11	6.1724e-11	9.87645e-11	1.12658e-10	1.2501e-10	2.11422e-10	0.555765	-6.78e-11	-8.79e-11	-9.36e-11	-5.99e-11	2.81e-11	1.79e-10	4.08e-10	7.82e-10	1.3e-09	0.555765	-7.1e-11	-7.72e-11	-8.33e-11	-7.41e-11	1.23e-11	3.73e-10	1.42e-09	3.41e-09	6.3e-09	0.555765	-3.44e-10	-3.24e-10	-3.55e-10	-2.93e-10	-5.71e-11	4.8e-10	1.41e-09	2.79e-09	4.71e-09	0.555765	3.08882e-12	3.8581e-11	2.31504e-11	1.38935e-11	6.48162e-11	3.78097e-10	1.42136e-09	3.47238e-09	6.57593e-09
0.55677	9.2597e-12	-3.07756e-12	1.54266e-11	4.47485e-11	5.24806e-11	8.95149e-11	1.11116e-10	1.26546e-10	1.94462e-10	0.55677	-6.81e-11	-9.2e-11	-9.12e-11	-6.04e-11	2.89e-11	1.75e-10	4.14e-10	7.93e-10	1.3e-09	0.55677	-5.87e-11	-7.56e-11	-9.72e-11	-8.18e-11	9.26e-12	3.67e-10	1.42e-09	3.39e-09	6.33e-09	0.55677	-3.32e-10	-3.18e-10	-3.58e-10	-3.04e-10	-5.56e-11	4.66e-10	1.41e-09	2.8e-09	4.71e-09	0.55677	1.54283e-11	3.70382e-11	2.62386e-11	1.54306e-11	6.01897e-11	3.75022e-10	1.41828e-09	3.47239e-09	6.56359e-09
0.557775	9.25576e-12	7.70685e-12	1.69744e-11	3.55017e-11	6.79011e-11	9.25925e-11	1.09575e-10	1.2038e-10	2.00623e-10	0.557775	-6.26e-11	-8.09e-11	-7.89e-11	-5.91e-11	3.11e-11	1.72e-10	4.17e-10	7.92e-10	1.31e-09	0.557775	-6.17e-11	-6.48e-11	-9.88e-11	-8.49e-11	1.08e-11	3.72e-10	1.42e-09	3.39e-09	6.33e-09	0.557775	-3.23e-10	-3.19e-10	-3.5e-10	-3.09e-10	-5.09e-11	4.71e-10	1.42e-09	2.8e-09	4.7e-09	0.557775	1.54362e-11	3.39539e-11	3.7036e-11	1.08041e-11	6.01886e-11	3.82732e-10	1.42291e-09	3.4909e-09	6.57284e-09
0.55878	-1.53934e-12	-7.71135e-12	1.38918e-11	4.32142e-11	7.40731e-11	8.33424e-11	1.142e-10	1.25001e-10	1.95996e-10	0.55878	-6.5e-11	-8.73e-11	-8.68e-11	-5.45e-11	2.38e-11	1.77e-10	4.14e-10	7.85e-10	1.3e-09	0.55878	-6.48e-11	-6.17e-11	-9.72e-11	-7.41e-11	-1.53e-12	3.75e-10	1.44e-09	3.38e-09	6.3e-09	0.55878	-3.27e-10	-3.36e-10	-3.53e-10	-3.02e-10	-3.4e-11	4.61e-10	1.41e-09	2.8e-09	4.71e-09	0.55878	2.46863e-11	3.54938e-11	4.01259e-11	9.25407e-12	6.17291e-11	3.84279e-10	1.42291e-09	3.49863e-09	6.56512e-09
0.559785	-1.54272e-12	-9.25914e-12	1.69789e-11	5.7093e-11	6.79112e-11	8.79632e-11	1.09573e-10	1.17293e-10	1.89825e-10	0.559785	-7.18e-11	-9.83e-11	-8.94e-11	-5.66e-11	2.66e-11	1.74e-10	4.18e-10	7.89e-10	1.3e-09	0.559785	-5.56e-11	-6.79e-11	-9.72e-11	-8.95e-11	9.25e-12	3.83e-10	1.44e-09	3.39e-09	6.31e-09	0.559785	-3.26e-10	-3.52e-10	-3.41e-10	-3.06e-10	-3.86e-11	4.6e-10	1.41e-09	2.8e-09	4.71e-09	0.559785	1.69817e-11	3.24084e-11	4.47513e-11	-7.70741e-12	5.71026e-11	3.88904e-10	1.41828e-09	3.51559e-09	6.54354e-09
0.56079	-1.12606e-15	-9.25689e-12	2.77763e-11	4.78474e-11	8.02479e-11	8.17929e-11	1.03399e-10	1.18834e-10	1.86742e-10	0.56079	-6.47e-11	-9.45e-11	-9.83e-11	-6.31e-11	2.06e-11	1.8e-10	4.12e-10	7.83e-10	1.3e-09	0.56079	-5.86e-11	-5.87e-11	-8.8e-11	-8.95e-11	4.63e-12	3.87e-10	1.44e-09	3.4e-09	6.31e-09	0.56079	-3.21e-10	-3.61e-10	-3.29e-10	-3.12e-10	-4.17e-11	4.51e-10	1.41e-09	2.79e-09	4.73e-09	0.56079	2.4688e-11	2.77763e-11	3.85838e-11	-2.81514e-15	5.55588e-11	3.84283e-10	1.41211e-09	3.51252e-09	6.5682e-09
0.561795	-1.54891e-12	-1.55004e-12	3.08645e-11	5.40144e-11	8.48744e-11	7.25366e-11	9.56864e-11	1.23462e-10	1.95991e-10	0.561795	-6.95e-11	-9.25e-11	-8.78e-11	-5.54e-11	2.23e-11	1.78e-10	4.22e-10	7.79e-10	1.3e-09	0.561795	-6.33e-11	-6.48e-11	-7.41e-11	-1.02e-10	4.63e-12	3.84e-10	1.44e-09	3.39e-09	6.31e-09	0.561795	-3.01e-10	-3.46e-10	-3.24e-10	-2.95e-10	-3.24e-11	4.54e-10	1.4e-09	2.82e-09	4.72e-09	0.561795	2.00649e-11	1.54379e-11	3.70371e-11	-5.63029e-16	5.55531e-11	3.93537e-10	1.40902e-09	3.52177e-09	6.54662e-09
0.5628	-1.85143e-11	-1.23406e-11	3.08679e-11	5.86414e-11	7.25377e-11	6.94506e-11	9.56819e-11	1.26551e-10	1.89828e-10	0.5628	-6.57e-11	-8.22e-11	-8.99e-11	-5.78e-11	3.11e-11	1.72e-10	4.13e-10	7.91e-10	1.31e-09	0.5628	-6.94e-11	-6.02e-11	-7.41e-11	-9.88e-11	-6.17e-12	3.83e-10	1.45e-09	3.39e-09	6.3e-09	0.5628	-3.04e-10	-3.46e-10	-3.3e-10	-2.89e-10	-4.01e-11	4.55e-10	1.41e-09	2.83e-09	4.71e-09	0.5628	2.16026e-11	1.69733e-11	3.0873e-11	-1.54103e-12	4.16754e-11	4.02794e-10	1.40747e-09	3.52023e-09	6.56666e-09
0.563805	-2.16003e-11	-7.71248e-12	3.70382e-11	5.40183e-11	6.94506e-11	7.40708e-11	9.10526e-11	1.34262e-10	1.94457e-10	0.563805	-6.81e-11	-8.78e-11	-9.35e-11	-6.32e-11	1.74e-11	1.73e-10	4.23e-10	7.85e-10	1.32e-09	0.563805	-7.25e-11	-6.48e-11	-6.94e-11	-9.26e-11	-1.23e-11	3.77e-10	1.45e-09	3.39e-09	6.29e-09	0.563805	-2.93e-10	-3.55e-10	-3.3e-10	-2.82e-10	-4.94e-11	4.57e-10	1.39e-09	2.82e-09	4.69e-09	0.563805	1.38952e-11	1.08064e-11	4.4749e-11	3.08769e-12	4.62974e-11	4.04337e-10	1.40594e-09	3.53257e-09	6.56821e-09
0.56481	-9.27096e-12	7.71304e-12	4.1667e-11	5.86397e-11	7.40714e-11	6.01943e-11	8.33407e-11	1.3273e-10	2.08337e-10	0.56481	-7.88e-11	-8.57e-11	-9.13e-11	-5.64e-11	1.96e-11	1.75e-10	4.16e-10	8e-10	1.3e-09	0.56481	-7.1e-11	-6.48e-11	-6.48e-11	-9.26e-11	-1.39e-11	3.78e-10	1.45e-09	3.41e-09	6.3e-09	0.56481	-2.84e-10	-3.7e-10	-3.24e-10	-2.81e-10	-5.25e-11	4.61e-10	1.41e-09	2.81e-09	4.7e-09	0.56481	2.15998e-11	1.38873e-11	4.16642e-11	1.07985e-11	4.7839e-11	3.96625e-10	1.41673e-09	3.53412e-09	6.56976e-09
0.565815	-2.77723e-11	1.38867e-11	4.16653e-11	4.93862e-11	6.17347e-11	6.32741e-11	8.48789e-11	1.52775e-10	2.05263e-10	0.565815	-6.12e-11	-8.09e-11	-8.51e-11	-6.05e-11	2.33e-11	1.8e-10	4.16e-10	7.97e-10	1.3e-09	0.565815	-8.49e-11	-6.48e-11	-6.02e-11	-7.87e-11	-1.7e-11	3.73e-10	1.44e-09	3.41e-09	6.29e-09	0.565815	-2.96e-10	-3.6e-10	-3.24e-10	-2.7e-10	-5.09e-11	4.63e-10	1.4e-09	2.82e-09	4.69e-09	0.565815	1.23502e-11	1.08007e-11	2.62381e-11	6.18158e-12	4.16703e-11	3.91997e-10	1.41057e-09	3.52949e-09	6.57902e-09
0.56682	-2.77774e-11	1.2348e-11	3.24146e-11	4.32153e-11	5.86448e-11	6.48157e-11	8.17963e-11	1.45072e-10	2.19138e-10	0.56682	-7.62e-11	-9.09e-11	-9.2e-11	-5.67e-11	1.93e-11	1.77e-10	4.18e-10	7.9e-10	1.3e-09	0.56682	-8.33e-11	-7.87e-11	-6.79e-11	-8.33e-11	-2.16e-11	3.7e-10	1.45e-09	3.41e-09	6.29e-09	0.56682	-2.86e-10	-3.53e-10	-3.33e-10	-2.76e-10	-6.17e-11	4.75e-10	1.4e-09	2.82e-09	4.69e-09	0.56682	1.38884e-11	1.54948e-12	1.69789e-11	2.46852e-11	4.01282e-11	3.9662e-10	1.41673e-09	3.53875e-09	6.59753e-09
0.567825	-2.31504e-11	1.54351e-11	3.85781e-11	4.6294e-11	5.55571e-11	6.01926e-11	8.48812e-11	1.46611e-10	2.11433e-10	0.567825	-7.53e-11	-9.37e-11	-9.66e-11	-5.79e-11	2.93e-11	1.75e-10	4.04e-10	7.89e-10	1.29e-09	0.567825	-9.41e-11	-7.72e-11	-7.25e-11	-6.64e-11	-2.31e-11	3.67e-10	1.44e-09	3.42e-09	6.3e-09	0.567825	-2.93e-10	-3.49e-10	-3.46e-10	-2.7e-10	-6.48e-11	4.91e-10	1.4e-09	2.82e-09	4.7e-09	0.567825	1.23451e-11	9.26195e-12	1.54328e-11	2.31515e-11	4.62963e-11	3.91996e-10	1.41211e-09	3.54029e-09	6.6068e-09
0.56883	-2.16054e-11	2.4688e-11	3.39539e-11	3.70394e-11	4.93885e-11	6.7905e-11	8.95133e-11	1.45069e-10	2.12973e-10	0.56883	-7.15e-11	-8.49e-11	-9.47e-11	-5.66e-11	2.56e-11	1.75e-10	4.14e-10	7.92e-10	1.31e-09	0.56883	-1.02e-10	-8.03e-11	-6.94e-11	-6.79e-11	-2.16e-11	3.61e-10	1.44e-09	3.42e-09	6.31e-09	0.56883	-2.98e-10	-3.52e-10	-3.4e-10	-2.65e-10	-6.64e-11	4.78e-10	1.41e-09	2.84e-09	4.72e-09	0.56883	7.71529e-12	2.31453e-11	1.38924e-11	2.7778e-11	4.63008e-11	3.93536e-10	1.41673e-09	3.53258e-09	6.62686e-09
0.569835	-1.85166e-11	2.16054e-11	3.39477e-11	2.93269e-11	5.24666e-11	7.71625e-11	1.01848e-10	1.45067e-10	2.14514e-10	0.569835	-7.22e-11	-8.16e-11	-8.8e-11	-6.23e-11	3.34e-11	1.68e-10	4.05e-10	7.91e-10	1.31e-09	0.569835	-8.64e-11	-8.49e-11	-6.02e-11	-6.79e-11	-3.1e-12	3.6e-10	1.43e-09	3.41e-09	6.31e-09	0.569835	-3.04e-10	-3.35e-10	-3.41e-10	-2.73e-10	-8.33e-11	4.75e-10	1.41e-09	2.82e-09	4.74e-09	0.569835	5.63029e-16	2.62358e-11	2.00576e-11	2.93235e-11	5.24711e-11	3.91992e-10	1.41982e-09	3.53412e-09	6.64383e-09
0.57084	-7.72374e-12	1.69789e-11	2.16116e-11	3.39466e-11	4.16743e-11	8.17963e-11	8.95183e-11	1.40442e-10	2.08346e-10	0.57084	-6.72e-11	-7.75e-11	-9.39e-11	-5.43e-11	2.53e-11	1.8e-10	4.11e-10	7.93e-10	1.31e-09	0.57084	-1e-10	-8.64e-11	-7.56e-11	-6.79e-11	-1.23e-11	3.63e-10	1.43e-09	3.44e-09	6.31e-09	0.57084	-3.21e-10	-3.38e-10	-3.61e-10	-2.73e-10	-6.95e-11	4.74e-10	1.43e-09	2.82e-09	4.76e-09	0.57084	-6.17201e-12	2.9323e-11	1.23508e-11	3.3946e-11	5.71015e-11	3.85819e-10	1.42907e-09	3.52486e-09	6.65309e-09
0.571845	-1.69665e-11	2.00599e-11	2.4688e-11	2.31538e-11	4.62974e-11	9.25897e-11	9.87701e-11	1.4507e-10	2.09885e-10	0.571845	-6.45e-11	-8.55e-11	-9.39e-11	-6.64e-11	2.52e-11	1.74e-10	4.13e-10	7.97e-10	1.32e-09	0.571845	-8.18e-11	-8.64e-11	-7.41e-11	-5.71e-11	-3.09e-12	3.55e-10	1.43e-09	3.43e-09	6.3e-09	0.571845	-3.33e-10	-3.04e-10	-3.63e-10	-2.69e-10	-6.94e-11	4.94e-10	1.41e-09	2.83e-09	4.73e-09	0.571845	-9.25632e-12	3.395e-11	1.69711e-11	2.16099e-11	6.17291e-11	3.73482e-10	1.42137e-09	3.52332e-09	6.65464e-09
0.57285	-4.50423e-15	1.54373e-11	1.54373e-11	2.46914e-11	4.78424e-11	8.33429e-11	1.08027e-10	1.52779e-10	2.08344e-10	0.57285	-6.6e-11	-8.51e-11	-9.82e-11	-6.09e-11	2.71e-11	1.83e-10	4.13e-10	7.82e-10	1.3e-09	0.57285	-8.33e-11	-8.49e-11	-8.18e-11	-6.94e-11	3.08e-12	3.49e-10	1.43e-09	3.42e-09	6.31e-09	0.57285	-3.26e-10	-3.18e-10	-3.52e-10	-2.7e-10	-6.64e-11	4.83e-10	1.42e-09	2.83e-09	4.73e-09	0.57285	-3.08657e-12	3.24073e-11	7.72148e-12	2.00632e-11	6.01903e-11	3.81185e-10	1.44142e-09	3.53565e-09	6.65772e-09
0.573855	4.6276e-12	2.31425e-11	1.85155e-11	2.31509e-11	5.09272e-11	8.95088e-11	1.09574e-10	1.43526e-10	2.08335e-10	0.573855	-7.17e-11	-8.53e-11	-9.98e-11	-6.44e-11	3.45e-11	1.68e-10	4.15e-10	7.95e-10	1.31e-09	0.573855	-8.64e-11	-8.49e-11	-8.49e-11	-6.79e-11	3.09e-12	3.55e-10	1.44e-09	3.43e-09	6.34e-09	0.573855	-3.41e-10	-3.1e-10	-3.6e-10	-2.82e-10	-7.41e-11	4.75e-10	1.43e-09	2.83e-09	4.73e-09	0.573855	3.08263e-12	2.62431e-11	1.23457e-11	2.00616e-11	6.48134e-11	3.71939e-10	1.44297e-09	3.5264e-09	6.65464e-09
0.57486	3.08769e-12	1.23496e-11	1.08047e-11	2.62369e-11	5.09278e-11	9.10543e-11	1.14204e-10	1.35808e-10	1.86747e-10	0.57486	-7.3e-11	-8.28e-11	-1.01e-10	-5.57e-11	2.78e-11	1.77e-10	4.1e-10	7.94e-10	1.3e-09	0.57486	-7.41e-11	-7.72e-11	-9.11e-11	-6.48e-11	1.23e-11	3.64e-10	1.42e-09	3.44e-09	6.34e-09	0.57486	-3.43e-10	-3.18e-10	-3.73e-10	-2.89e-10	-7.1e-11	4.78e-10	1.4e-09	2.83e-09	4.76e-09	0.57486	-1.54103e-12	4.01186e-11	1.54345e-11	1.69772e-11	5.71082e-11	3.84271e-10	1.43526e-09	3.52178e-09	6.66543e-09
0.575865	4.63098e-12	1.07985e-11	7.71811e-12	3.24095e-11	4.93913e-11	9.41397e-11	1.21915e-10	1.25012e-10	1.92907e-10	0.575865	-7.2e-11	-8.95e-11	-9.6e-11	-5.51e-11	2.73e-11	1.78e-10	3.97e-10	7.91e-10	1.31e-09	0.575865	-5.86e-11	-7.25e-11	-9.72e-11	-7.87e-11	6.76e-15	3.7e-10	1.43e-09	3.44e-09	6.31e-09	0.575865	-3.56e-10	-3.26e-10	-3.53e-10	-2.99e-10	-5.86e-11	4.72e-10	1.41e-09	2.81e-09	4.74e-09	0.575865	5.63029e-16	3.5495e-11	2.31464e-11	1.69711e-11	6.79e-11	3.78107e-10	1.44142e-09	3.53257e-09	6.65773e-09
0.57687	9.25182e-12	-3.08431e-12	9.26026e-12	4.01203e-11	6.48123e-11	9.56802e-11	1.17289e-10	1.31173e-10	1.89823e-10	0.57687	-6.48e-11	-8.09e-11	-8.95e-11	-5.75e-11	2.69e-11	1.75e-10	4.1e-10	7.98e-10	1.31e-09	0.57687	-5.71e-11	-6.48e-11	-9.41e-11	-8.18e-11	6.17e-12	3.77e-10	1.44e-09	3.43e-09	6.34e-09	0.57687	-3.5e-10	-3.23e-10	-3.72e-10	-3.06e-10	-5.71e-11	4.68e-10	1.41e-09	2.82e-09	4.73e-09	0.57687	3.08826e-12	2.93269e-11	2.31521e-11	3.09445e-12	6.63612e-11	3.78106e-10	1.43526e-09	3.53412e-09	6.6531e-09
0.577875	-7.70291e-12	-1.0799e-11	1.23446e-11	3.39596e-11	6.48179e-11	8.79711e-11	1.11119e-10	1.21922e-10	1.83656e-10	0.577875	-7.44e-11	-9.22e-11	-8.85e-11	-5.5e-11	2.02e-11	1.78e-10	4.15e-10	7.98e-10	1.3e-09	0.577875	-5.86e-11	-6.17e-11	-9.72e-11	-7.41e-11	3.09e-12	3.87e-10	1.44e-09	3.41e-09	6.31e-09	0.577875	-3.46e-10	-3.3e-10	-3.66e-10	-3.06e-10	-3.71e-11	4.6e-10	1.41e-09	2.8e-09	4.74e-09	0.577875	1.08007e-11	3.5491e-11	3.08662e-11	1.07979e-11	6.48157e-11	3.82733e-10	1.44913e-09	3.53875e-09	6.66081e-09
0.57888	1.23305e-11	-7.71923e-12	1.08064e-11	4.78378e-11	6.48196e-11	9.10481e-11	1.1266e-10	1.20377e-10	1.91361e-10	0.57888	-7.17e-11	-8.85e-11	-8.43e-11	-6.71e-11	2.25e-11	1.77e-10	4.11e-10	7.93e-10	1.31e-09	0.57888	-6.02e-11	-6.48e-11	-9.41e-11	-8.95e-11	7.71e-12	3.86e-10	1.44e-09	3.39e-09	6.29e-09	0.57888	-3.24e-10	-3.38e-10	-3.46e-10	-3.02e-10	-4.94e-11	4.54e-10	1.41e-09	2.81e-09	4.72e-09	0.57888	1.23485e-11	2.93207e-11	4.01203e-11	4.62985e-12	5.71021e-11	3.82738e-10	1.43988e-09	3.53567e-09	6.66235e-09
0.579885	-1.07889e-11	-1.23423e-11	1.85188e-11	5.09278e-11	6.945e-11	7.87125e-11	1.14199e-10	1.21921e-10	1.82114e-10	0.579885	-7.51e-11	-8.25e-11	-9.04e-11	-6.72e-11	2.4e-11	1.72e-10	4.19e-10	7.86e-10	1.32e-09	0.579885	-7.1e-11	-6.17e-11	-9.41e-11	-8.64e-11	3.09e-12	3.87e-10	1.43e-09	3.4e-09	6.29e-09	0.579885	-3.16e-10	-3.32e-10	-3.32e-10	-3.07e-10	-3.86e-11	4.46e-10	1.42e-09	2.82e-09	4.73e-09	0.579885	2.00599e-11	1.85228e-11	3.55e-11	-1.54159e-12	5.093e-11	3.93533e-10	1.426e-09	3.56343e-09	6.6531e-09
0.58089	4.61746e-12	-6.17595e-12	2.46925e-11	5.24756e-11	8.0244e-11	8.02457e-11	1.04943e-10	1.26548e-10	1.89821e-10	0.58089	-7.51e-11	-8.56e-11	-9.08e-11	-4.78e-11	2.74e-11	1.78e-10	4.26e-10	7.92e-10	1.31e-09	0.58089	-6.64e-11	-6.17e-11	-8.8e-11	-9.88e-11	9.26e-12	4.01e-10	1.43e-09	3.4e-09	6.28e-09	0.58089	-3.15e-10	-3.35e-10	-3.33e-10	-2.99e-10	-4.01e-11	4.51e-10	1.41e-09	2.82e-09	4.71e-09	0.58089	2.00616e-11	1.6975e-11	4.32086e-11	-3.08431e-12	4.93851e-11	3.93541e-10	1.43987e-09	3.56499e-09	6.66543e-09
0.581895	-1.38845e-11	-7.71585e-12	3.08691e-11	6.48106e-11	7.25377e-11	6.79095e-11	9.41454e-11	1.26551e-10	1.89824e-10	0.581895	-6.73e-11	-9.15e-11	-9.42e-11	-5.59e-11	2.3e-11	1.76e-10	4.22e-10	7.96e-10	1.32e-09	0.581895	-6.33e-11	-6.17e-11	-8.18e-11	-1e-10	4.63e-12	3.86e-10	1.43e-09	3.41e-09	6.29e-09	0.581895	-2.99e-10	-3.36e-10	-3.3e-10	-2.93e-10	-4.17e-11	4.57e-10	1.42e-09	2.82e-09	4.72e-09	0.581895	1.69795e-11	1.23451e-11	4.1667e-11	1.54272e-12	4.78401e-11	4.04337e-10	1.41983e-09	3.57733e-09	6.65002e-09
0.5829	-1.85177e-11	-7.71417e-12	4.62901e-11	5.71032e-11	7.40754e-11	6.94489e-11	9.72207e-11	1.31179e-10	1.89827e-10	0.5829	-6.66e-11	-8.88e-11	-9.46e-11	-6.12e-11	2.87e-11	1.79e-10	4.22e-10	7.86e-10	1.31e-09	0.5829	-6.64e-11	-5.86e-11	-7.87e-11	-9.11e-11	-7.72e-12	3.87e-10	1.43e-09	3.41e-09	6.28e-09	0.5829	-2.93e-10	-3.49e-10	-3.32e-10	-2.9e-10	-4.17e-11	4.52e-10	1.4e-09	2.83e-09	4.73e-09	0.5829	2.31481e-11	4.63379e-12	3.54983e-11	4.63154e-12	4.16698e-11	4.07425e-10	1.4337e-09	3.5835e-09	6.65773e-09
0.583905	-1.85205e-11	-1.54554e-12	3.8586e-11	5.40161e-11	6.94506e-11	7.40731e-11	8.33435e-11	1.35807e-10	1.97538e-10	0.583905	-7.06e-11	-8.4e-11	-8.28e-11	-5.9e-11	2.57e-11	1.78e-10	4.22e-10	7.9e-10	1.31e-09	0.583905	-6.94e-11	-6.17e-11	-6.33e-11	-8.49e-11	-2.01e-11	3.89e-10	1.44e-09	3.42e-09	6.28e-09	0.583905	-2.79e-10	-3.53e-10	-3.27e-10	-2.79e-10	-4.78e-11	4.57e-10	1.4e-09	2.82e-09	4.71e-09	0.583905	2.62308e-11	7.7136e-12	3.70371e-11	1.23435e-11	3.8581e-11	4.0434e-10	1.43062e-09	3.56654e-09	6.66852e-09
0.58491	-2.16071e-11	-1.54159e-12	4.16642e-11	5.40161e-11	7.25321e-11	6.63646e-11	8.64261e-11	1.34271e-10	1.99086e-10	0.58491	-6.78e-11	-8.5e-11	-9.14e-11	-7.49e-11	2.15e-11	1.81e-10	4.16e-10	8.05e-10	1.32e-09	0.58491	-6.79e-11	-6.48e-11	-7.72e-11	-9.41e-11	-1.85e-11	3.83e-10	1.45e-09	3.41e-09	6.3e-09	0.58491	-2.87e-10	-3.64e-10	-3.23e-10	-2.79e-10	-5.25e-11	4.69e-10	1.4e-09	2.83e-09	4.72e-09	0.58491	1.54357e-11	3.08882e-12	3.39534e-11	1.2348e-11	3.24146e-11	4.01257e-10	1.41983e-09	3.57887e-09	6.66853e-09
0.585915	-2.77785e-11	3.08882e-12	3.24135e-11	5.70964e-11	6.94438e-11	6.79e-11	9.5674e-11	1.46607e-10	2.06797e-10	0.585915	-7.19e-11	-9.25e-11	-8.77e-11	-6.45e-11	2.51e-11	1.77e-10	4.2e-10	7.94e-10	1.31e-09	0.585915	-8.95e-11	-6.64e-11	-7.87e-11	-8.18e-11	-2.31e-11	3.67e-10	1.44e-09	3.42e-09	6.29e-09	0.585915	-2.89e-10	-3.64e-10	-3.24e-10	-2.81e-10	-5.25e-11	4.72e-10	1.39e-09	2.83e-09	4.73e-09	0.585915	1.23485e-11	4.63098e-12	3.39522e-11	1.6975e-11	4.16619e-11	4.07423e-10	1.42291e-09	3.57734e-09	6.67778e-09
0.58692	-3.2405e-11	1.38884e-11	3.5495e-11	4.63008e-11	5.55616e-11	5.71071e-11	7.87165e-11	1.46613e-10	2.05261e-10	0.58692	-6.85e-11	-9.03e-11	-1.01e-10	-6.06e-11	2.7e-11	1.75e-10	4.28e-10	7.96e-10	1.32e-09	0.58692	-8.64e-11	-8.18e-11	-6.64e-11	-8.95e-11	-2.47e-11	3.7e-10	1.46e-09	3.42e-09	6.28e-09	0.58692	-2.99e-10	-3.72e-10	-3.24e-10	-2.72e-10	-6.17e-11	4.61e-10	1.39e-09	2.81e-09	4.71e-09	0.58692	1.54283e-11	9.25914e-12	3.39477e-11	1.85222e-11	3.24163e-11	4.02799e-10	1.43833e-09	3.59121e-09	6.67779e-09
0.587925	-2.62336e-11	2.15998e-11	3.70416e-11	4.16658e-11	5.09284e-11	6.17319e-11	8.64216e-11	1.49699e-10	2.14512e-10	0.587925	-6.83e-11	-8.19e-11	-9e-11	-5.87e-11	2.6e-11	1.69e-10	4.2e-10	7.88e-10	1.31e-09	0.587925	-9.72e-11	-7.72e-11	-5.87e-11	-7.1e-11	-2.62e-11	3.75e-10	1.45e-09	3.44e-09	6.29e-09	0.587925	-3.02e-10	-3.58e-10	-3.27e-10	-2.69e-10	-6.64e-11	4.77e-10	1.4e-09	2.82e-09	4.73e-09	0.587925	6.17201e-12	1.2344e-11	2.16116e-11	2.77746e-11	4.32091e-11	4.04337e-10	1.426e-09	3.58042e-09	6.69167e-09
0.58893	-1.38969e-11	1.23553e-11	4.62878e-11	2.9328e-11	4.63019e-11	6.79033e-11	8.79643e-11	1.54324e-10	2.11434e-10	0.58893	-7.83e-11	-8.59e-11	-8.97e-11	-5.45e-11	2.53e-11	1.82e-10	4.22e-10	8e-10	1.31e-09	0.58893	-9.72e-11	-8.33e-11	-7.25e-11	-7.25e-11	-1.39e-11	3.5e-10	1.46e-09	3.41e-09	6.31e-09	0.58893	-3.07e-10	-3.36e-10	-3.3e-10	-2.62e-10	-6.64e-11	4.8e-10	1.41e-09	2.84e-09	4.72e-09	0.58893	-6.16694e-12	9.26364e-12	2.4688e-11	2.46937e-11	4.62979e-11	3.96626e-10	1.44142e-09	3.58504e-09	6.69477e-09
0.589935	-2.16026e-11	2.77712e-11	2.62398e-11	3.24084e-11	5.09244e-11	7.09933e-11	8.18008e-11	1.48159e-10	2.19142e-10	0.589935	-6.69e-11	-9.6e-11	-8.26e-11	-6.2e-11	2.84e-11	1.74e-10	4.11e-10	7.95e-10	1.32e-09	0.589935	-8.95e-11	-9.72e-11	-6.95e-11	-7.41e-11	-1.85e-11	3.63e-10	1.45e-09	3.42e-09	6.31e-09	0.589935	-3.01e-10	-3.21e-10	-3.49e-10	-2.73e-10	-8.02e-11	4.82e-10	1.4e-09	2.85e-09	4.75e-09	0.589935	-1.55004e-12	1.69778e-11	1.54323e-11	2.46914e-11	4.78446e-11	3.93538e-10	1.43835e-09	3.56654e-09	6.71482e-09
0.59094	-2.00565e-11	2.16088e-11	1.69806e-11	3.39483e-11	4.47586e-11	8.02502e-11	9.4138e-11	1.52778e-10	2.1606e-10	0.59094	-6.21e-11	-8.7e-11	-8.89e-11	-6.17e-11	3.72e-11	1.81e-10	4.12e-10	7.99e-10	1.31e-09	0.59094	-9.41e-11	-9.41e-11	-8.18e-11	-7.25e-11	-7.72e-12	3.58e-10	1.44e-09	3.45e-09	6.32e-09	0.59094	-3.12e-10	-3.24e-10	-3.47e-10	-2.79e-10	-7.56e-11	4.77e-10	1.41e-09	2.83e-09	4.75e-09	0.59094	-1.5425e-11	2.93173e-11	4.63435e-12	2.16077e-11	5.70981e-11	3.91992e-10	1.45223e-09	3.58041e-09	6.71638e-09
0.591945	-1.54891e-12	2.31459e-11	2.00599e-11	2.46954e-11	4.78367e-11	8.79655e-11	1.0031e-10	1.37358e-10	2.14514e-10	0.591945	-6.71e-11	-8.73e-11	-9.28e-11	-6.02e-11	2.3e-11	1.72e-10	4.04e-10	7.92e-10	1.31e-09	0.591945	-9.11e-11	-8.33e-11	-8.03e-11	-6.79e-11	-6.17e-12	3.63e-10	1.44e-09	3.43e-09	6.33e-09	0.591945	-3.27e-10	-3.21e-10	-3.66e-10	-2.86e-10	-7.56e-11	4.86e-10	1.41e-09	2.84e-09	4.72e-09	0.591945	-7.71754e-12	2.77802e-11	6.17201e-12	2.31493e-11	5.71026e-11	3.84277e-10	1.45532e-09	3.58659e-09	6.74259e-09
0.59295	1.54159e-12	1.5434e-11	1.54328e-11	2.31515e-11	3.70456e-11	9.1052e-11	9.72331e-11	1.38894e-10	2.06803e-10	0.59295	-7.41e-11	-9.44e-11	-9.02e-11	-6.13e-11	2.05e-11	1.83e-10	4.16e-10	7.96e-10	1.32e-09	0.59295	-8.95e-11	-8.64e-11	-8.8e-11	-6.17e-11	3.08e-12	3.64e-10	1.44e-09	3.43e-09	6.34e-09	0.59295	-3.27e-10	-3.4e-10	-3.53e-10	-2.78e-10	-7.72e-11	4.83e-10	1.42e-09	2.82e-09	4.73e-09	0.59295	-3.08769e-12	2.93258e-11	4.63267e-12	2.46892e-11	6.01886e-11	3.75022e-10	1.45994e-09	3.58505e-09	6.73643e-09
0.593955	4.50423e-15	1.08064e-11	1.08064e-11	2.77723e-11	4.47558e-11	8.95149e-11	1.1111e-10	1.35808e-10	2.08341e-10	0.593955	-6.85e-11	-7.77e-11	-8.83e-11	-6.2e-11	2.35e-11	1.86e-10	4.22e-10	7.89e-10	1.31e-09	0.593955	-8.03e-11	-8.8e-11	-8.8e-11	-7.41e-11	3.94e-15	3.63e-10	1.44e-09	3.41e-09	6.34e-09	0.593955	-3.4e-10	-3.23e-10	-3.61e-10	-2.87e-10	-7.25e-11	4.75e-10	1.41e-09	2.81e-09	4.75e-09	0.593955	-1.54554e-12	4.01169e-11	1.08035e-11	1.69829e-11	6.48151e-11	3.78106e-10	1.45378e-09	3.58351e-09	6.73644e-09
0.59496	1.07974e-11	1.5425e-11	1.54278e-11	1.39019e-11	5.40127e-11	1.00307e-10	1.08033e-10	1.31179e-10	2.03716e-10	0.59496	-6.67e-11	-9.24e-11	-8.98e-11	-6.26e-11	1.88e-11	1.76e-10	4.14e-10	8.03e-10	1.32e-09	0.59496	-6.95e-11	-8.03e-11	-8.64e-11	-6.64e-11	7.71e-12	3.67e-10	1.43e-09	3.42e-09	6.33e-09	0.59496	-3.38e-10	-3.15e-10	-3.64e-10	-2.98e-10	-6.48e-11	4.74e-10	1.42e-09	2.81e-09	4.74e-09	0.59496	-6.1675e-12	2.77875e-11	1.8516e-11	2.77701e-11	6.17342e-11	3.85818e-10	1.4692e-09	3.59121e-09	6.74877e-09
0.595965	6.17651e-12	-1.53709e-12	6.17708e-12	3.39449e-11	5.71026e-11	9.41414e-11	1.14202e-10	1.26551e-10	2.06795e-10	0.595965	-6.89e-11	-8.96e-11	-9.43e-11	-7.08e-11	2.62e-11	1.78e-10	4.09e-10	8.02e-10	1.32e-09	0.595965	-6.64e-11	-7.72e-11	-9.26e-11	-7.72e-11	1.55e-12	3.75e-10	1.43e-09	3.42e-09	6.33e-09	0.595965	-3.32e-10	-3.15e-10	-3.55e-10	-2.96e-10	-4.79e-11	4.71e-10	1.42e-09	2.83e-09	4.73e-09	0.595965	4.62985e-12	3.85748e-11	1.69823e-11	1.38901e-11	6.63589e-11	3.85821e-10	1.4692e-09	3.58197e-09	6.74878e-09
0.59697	1.07979e-11	-1.54216e-12	7.7198e-12	3.39551e-11	6.32735e-11	9.10537e-11	1.17286e-10	1.2809e-10	1.96002e-10	0.59697	-6.91e-11	-8.26e-11	-8.53e-11	-6.95e-11	1.97e-11	1.76e-10	4.19e-10	7.96e-10	1.32e-09	0.59697	-7.1e-11	-6.48e-11	-1e-10	-7.87e-11	1.39e-11	3.72e-10	1.45e-09	3.42e-09	6.33e-09	0.59697	-3.32e-10	-3.16e-10	-3.55e-10	-3.04e-10	-5.71e-11	4.6e-10	1.42e-09	2.82e-09	4.75e-09	0.59697	1.54283e-11	2.9328e-11	3.24067e-11	1.54948e-12	6.48162e-11	3.85821e-10	1.46612e-09	3.59122e-09	6.74723e-09
0.597975	1.54891e-12	1.53765e-12	1.85166e-11	4.16703e-11	6.63634e-11	8.797e-11	1.0958e-10	1.21921e-10	1.99082e-10	0.597975	-6.63e-11	-8.06e-11	-8.89e-11	-6.36e-11	2.69e-11	1.77e-10	4.12e-10	7.93e-10	1.32e-09	0.597975	-6.48e-11	-6.48e-11	-9.41e-11	-8.95e-11	1.08e-11	3.75e-10	1.44e-09	3.41e-09	6.31e-09	0.597975	-3.3e-10	-3.24e-10	-3.38e-10	-3.07e-10	-4.94e-11	4.55e-10	1.42e-09	2.83e-09	4.73e-09	0.597975	1.38896e-11	3.54888e-11	4.16625e-11	6.16976e-12	5.86465e-11	3.85821e-10	1.46149e-09	3.58968e-09	6.73797e-09
0.59898	7.71079e-12	-1.07974e-11	2.16037e-11	5.40115e-11	7.56136e-11	9.25942e-11	1.20368e-10	1.20374e-10	1.9908e-10	0.59898	-6.83e-11	-8.66e-11	-8.91e-11	-5.75e-11	2.9e-11	1.75e-10	4.19e-10	7.96e-10	1.31e-09	0.59898	-5.25e-11	-6.33e-11	-9.26e-11	-8.64e-11	1.55e-12	3.8e-10	1.44e-09	3.42e-09	6.32e-09	0.59898	-3.12e-10	-3.24e-10	-3.49e-10	-3.09e-10	-4.63e-11	4.48e-10	1.42e-09	2.83e-09	4.73e-09	0.59898	1.23508e-11	2.31526e-11	3.39596e-11	1.54385e-12	5.70998e-11	3.85825e-10	1.45532e-09	3.58814e-09	6.71792e-09
0.599985	-1.54216e-12	-7.71867e-12	1.85211e-11	5.71021e-11	6.48252e-11	8.95054e-11	1.09574e-10	1.12667e-10	1.89827e-10	0.599985	-6.58e-11	-9.41e-11	-9.02e-11	-6.27e-11	2.12e-11	1.77e-10	4.28e-10	8.03e-10	1.31e-09	0.599985	-6.17e-11	-5.25e-11	-9.11e-11	-8.64e-11	4.63e-12	3.87e-10	1.45e-09	3.41e-09	6.29e-09	0.599985	-3.09e-10	-3.41e-10	-3.41e-10	-2.99e-10	-4.48e-11	4.58e-10	1.43e-09	2.84e-09	4.72e-09	0.599985	2.31419e-11	2.00599e-11	4.62895e-11	-1.54272e-12	5.09317e-11	3.9662e-10	1.4584e-09	3.61282e-09	6.73026e-09
0.60099	-7.71529e-12	-1.07996e-11	2.00655e-11	6.17285e-11	7.40776e-11	7.25411e-11	1.0186e-10	1.25003e-10	1.88282e-10	0.60099	-6.63e-11	-8.74e-11	-8.45e-11	-6.02e-11	2.45e-11	1.85e-10	4.25e-10	8e-10	1.32e-09	0.60099	-4.79e-11	-5.56e-11	-8.64e-11	-9.41e-11	9.25e-12	3.83e-10	1.45e-09	3.42e-09	6.29e-09	0.60099	-3.09e-10	-3.3e-10	-3.29e-10	-3.09e-10	-4.94e-11	4.57e-10	1.41e-09	2.84e-09	4.72e-09	0.60099	1.38969e-11	9.2642e-12	3.39596e-11	-3.08938e-12	5.40132e-11	3.98168e-10	1.45532e-09	3.6082e-09	6.7318e-09
0.601995	-1.08075e-11	-4.63154e-12	2.9319e-11	5.86459e-11	8.333e-11	7.40754e-11	1.03399e-10	1.29634e-10	1.89827e-10	0.601995	-6.62e-11	-9.43e-11	-9.11e-11	-6.49e-11	2.46e-11	1.75e-10	4.26e-10	7.9e-10	1.33e-09	0.601995	-7.1e-11	-6.02e-11	-8.64e-11	-9.72e-11	-7.71e-12	3.8e-10	1.45e-09	3.44e-09	6.3e-09	0.601995	-2.92e-10	-3.41e-10	-3.3e-10	-3.02e-10	-4.32e-11	4.49e-10	1.41e-09	2.84e-09	4.73e-09	0.601995	2.4688e-11	1.08035e-11	4.16647e-11	-1.23384e-11	5.24722e-11	4.01255e-10	1.45069e-09	3.62208e-09	6.73489e-09
0.603	-2.62262e-11	-3.08713e-12	2.93286e-11	5.86437e-11	7.25377e-11	6.94511e-11	1.03393e-10	1.28095e-10	1.99084e-10	0.603	-6.39e-11	-9.45e-11	-9e-11	-6.09e-11	2.25e-11	1.79e-10	4.2e-10	7.97e-10	1.32e-09	0.603	-7.25e-11	-5.86e-11	-6.79e-11	-9.72e-11	-1.54e-11	3.92e-10	1.47e-09	3.42e-09	6.32e-09	0.603	-2.98e-10	-3.4e-10	-3.29e-10	-2.84e-10	-4.78e-11	4.54e-10	1.4e-09	2.85e-09	4.73e-09	0.603	2.31498e-11	1.3885e-11	3.85843e-11	-3.37817e-15	5.24683e-11	4.07425e-10	1.45069e-09	3.62517e-09	6.74569e-09
0.604005	-1.54402e-11	-3.08375e-12	4.62906e-11	5.55582e-11	7.09899e-11	7.40697e-11	8.33463e-11	1.3272e-10	2.09881e-10	0.604005	-6.32e-11	-8.48e-11	-8.14e-11	-6.2e-11	2.73e-11	1.81e-10	4.28e-10	7.9e-10	1.31e-09	0.604005	-8.18e-11	-5.4e-11	-6.64e-11	-9.57e-11	-1.55e-12	3.84e-10	1.45e-09	3.42e-09	6.32e-09	0.604005	-3.01e-10	-3.49e-10	-3.3e-10	-2.82e-10	-5.09e-11	4.66e-10	1.39e-09	2.84e-09	4.73e-09	0.604005	2.31464e-11	4.63435e-12	4.16636e-11	3.09107e-12	4.32131e-11	4.08968e-10	1.45994e-09	3.63289e-09	6.74261e-09
0.60501	-2.46903e-11	4.62647e-12	4.16692e-11	5.24711e-11	6.6364e-11	5.71116e-11	8.79649e-11	1.31186e-10	2.05258e-10	0.60501	-6.81e-11	-8.42e-11	-9.74e-11	-6.6e-11	2.29e-11	1.72e-10	4.26e-10	7.94e-10	1.33e-09	0.60501	-8.18e-11	-6.48e-11	-6.64e-11	-9.72e-11	-1.39e-11	3.78e-10	1.44e-09	3.44e-09	6.34e-09	0.60501	-2.92e-10	-3.56e-10	-3.3e-10	-2.73e-10	-4.63e-11	4.61e-10	1.4e-09	2.84e-09	4.73e-09	0.60501	1.54357e-11	7.71754e-12	3.08702e-11	1.85132e-11	3.70433e-11	4.05886e-10	1.44761e-09	3.63289e-09	6.75032e-09
0.606015	-2.77757e-11	3.0922e-12	3.8581e-11	4.78401e-11	6.94421e-11	6.79017e-11	8.64261e-11	1.48152e-10	2.0526e-10	0.606015	-7.78e-11	-8.4e-11	-9.03e-11	-6.22e-11	2.48e-11	1.86e-10	4.2e-10	7.93e-10	1.32e-09	0.606015	-8.95e-11	-6.17e-11	-6.64e-11	-8.64e-11	-2.62e-11	3.64e-10	1.46e-09	3.45e-09	6.35e-09	0.606015	-2.98e-10	-3.61e-10	-3.29e-10	-2.69e-10	-5.86e-11	4.75e-10	1.4e-09	2.85e-09	4.73e-09	0.606015	1.54317e-11	1.38817e-11	3.24033e-11	1.69795e-11	4.32097e-11	4.08969e-10	1.45377e-09	3.63444e-09	6.74725e-09
0.60702	-2.16088e-11	1.69727e-11	3.2418e-11	3.85877e-11	5.71037e-11	7.09865e-11	9.10475e-11	1.57407e-10	2.14515e-10	0.60702	-6.32e-11	-9.11e-11	-7.82e-11	-5.86e-11	2.82e-11	1.79e-10	4.21e-10	8e-10	1.32e-09	0.60702	-8.8e-11	-6.79e-11	-6.48e-11	-8.49e-11	-1.85e-11	3.67e-10	1.46e-09	3.43e-09	6.35e-09	0.60702	-3.09e-10	-3.63e-10	-3.3e-10	-2.81e-10	-5.86e-11	4.71e-10	1.39e-09	2.86e-09	4.71e-09	0.60702	1.23446e-11	-1.53371e-12	1.85239e-11	2.46897e-11	4.32114e-11	4.08968e-10	1.44452e-09	3.64523e-09	6.78581e-09
0.608025	-2.31487e-11	2.16048e-11	5.09143e-11	4.47513e-11	5.09306e-11	6.17398e-11	7.87159e-11	1.45076e-10	2.19147e-10	0.608025	-6.61e-11	-9.25e-11	-9.19e-11	-6.59e-11	3.62e-11	1.75e-10	4.21e-10	7.98e-10	1.33e-09	0.608025	-9.72e-11	-8.64e-11	-6.33e-11	-8.49e-11	-2.01e-11	3.64e-10	1.46e-09	3.45e-09	6.37e-09	0.608025	-2.99e-10	-3.44e-10	-3.41e-10	-2.72e-10	-7.25e-11	4.88e-10	1.4e-09	2.85e-09	4.74e-09	0.608025	4.6321e-12	9.2552e-12	1.69772e-11	2.46892e-11	4.16675e-11	4.04339e-10	1.4476e-09	3.64831e-09	6.7997e-09
0.60903	-2.31436e-11	2.3147e-11	3.08724e-11	4.01231e-11	5.09272e-11	7.56186e-11	8.95071e-11	1.52782e-10	2.25318e-10	0.60903	-7.91e-11	-8.53e-11	-8.84e-11	-7.18e-11	2.47e-11	1.79e-10	4.14e-10	8.03e-10	1.33e-09	0.60903	-8.18e-11	-7.72e-11	-6.02e-11	-7.41e-11	-2.16e-11	3.67e-10	1.46e-09	3.45e-09	6.35e-09	0.60903	-3.13e-10	-3.32e-10	-3.38e-10	-2.7e-10	-6.02e-11	4.83e-10	1.4e-09	2.85e-09	4.75e-09	0.60903	3.08713e-12	7.71867e-12	1.85155e-11	1.54418e-11	3.70478e-11	3.96626e-10	1.45532e-09	3.62826e-09	6.79817e-09
0.610035	-7.72543e-12	1.85228e-11	2.93218e-11	2.93269e-11	4.78356e-11	8.33334e-11	9.1056e-11	1.52784e-10	2.28404e-10	0.610035	-6.89e-11	-8.55e-11	-9e-11	-5.89e-11	2.48e-11	1.79e-10	4.21e-10	8.1e-10	1.32e-09	0.610035	-9.11e-11	-8.95e-11	-6.33e-11	-7.1e-11	-1.39e-11	3.58e-10	1.46e-09	3.46e-09	6.34e-09	0.610035	-3.21e-10	-3.4e-10	-3.35e-10	-2.65e-10	-8.02e-11	4.98e-10	1.4e-09	2.84e-09	4.75e-09	0.610035	3.08263e-12	1.23496e-11	9.26477e-12	3.08617e-11	5.70942e-11	3.93536e-10	1.46457e-09	3.62055e-09	6.81976e-09
0.61104	-1.69682e-11	2.31453e-11	2.62291e-11	3.08629e-11	2.77921e-11	8.02519e-11	9.87685e-11	1.51238e-10	2.2686e-10	0.61104	-7.15e-11	-8.75e-11	-8.95e-11	-6.16e-11	2.62e-11	1.77e-10	4.19e-10	8.02e-10	1.33e-09	0.61104	-9.26e-11	-9.26e-11	-7.87e-11	-6.64e-11	-9.26e-12	3.69e-10	1.45e-09	3.46e-09	6.34e-09	0.61104	-3.27e-10	-3.41e-10	-3.49e-10	-2.73e-10	-7.56e-11	4.94e-10	1.4e-09	2.84e-09	4.74e-09	0.61104	-7.71585e-12	2.62285e-11	1.38884e-11	3.54893e-11	5.71009e-11	3.85824e-10	1.46612e-09	3.619e-09	6.82594e-09
0.612045	-4.63267e-12	1.69795e-11	4.64224e-12	2.46954e-11	4.32069e-11	8.02536e-11	1.01857e-10	1.40442e-10	2.17606e-10	0.612045	-7.15e-11	-9.23e-11	-9.43e-11	-6.31e-11	2.47e-11	1.82e-10	4.29e-10	7.97e-10	1.32e-09	0.612045	-8.64e-11	-9.26e-11	-7.56e-11	-6.17e-11	-1.54e-11	3.61e-10	1.44e-09	3.46e-09	6.38e-09	0.612045	-3.29e-10	-3.33e-10	-3.58e-10	-2.7e-10	-8.33e-11	4.83e-10	1.41e-09	2.83e-09	4.76e-09	0.612045	-1.69711e-11	2.00689e-11	1.543e-11	2.31577e-11	5.55644e-11	3.85819e-10	1.46767e-09	3.619e-09	6.82441e-09
0.61305	0	2.00587e-11	1.69711e-11	2.62364e-11	4.47547e-11	8.79672e-11	1.06488e-10	1.38891e-10	2.16058e-10	0.61305	-6.66e-11	-9.04e-11	-8.57e-11	-6.4e-11	2.67e-11	1.82e-10	4.24e-10	8.05e-10	1.34e-09	0.61305	-7.87e-11	-8.33e-11	-8.02e-11	-7.1e-11	-3.09e-12	3.69e-10	1.45e-09	3.46e-09	6.35e-09	0.61305	-3.53e-10	-3.29e-10	-3.63e-10	-2.82e-10	-7.1e-11	4.82e-10	1.41e-09	2.82e-09	4.76e-09	0.61305	-1.23446e-11	3.08617e-11	9.26477e-12	3.39438e-11	7.09798e-11	3.81196e-10	1.47846e-09	3.62363e-09	6.84137e-09
0.614055	4.62872e-12	1.23474e-11	1.543e-11	2.93213e-11	4.47569e-11	9.56825e-11	1.15742e-10	1.25014e-10	2.0989e-10	0.614055	-6.78e-11	-8.89e-11	-9.27e-11	-5.7e-11	2.07e-11	1.85e-10	4.21e-10	8.04e-10	1.33e-09	0.614055	-7.1e-11	-8.64e-11	-7.72e-11	-6.94e-11	6.17e-12	3.8e-10	1.43e-09	3.46e-09	6.38e-09	0.614055	-3.41e-10	-3.29e-10	-3.57e-10	-2.86e-10	-5.87e-11	4.8e-10	1.42e-09	2.82e-09	4.75e-09	0.614055	-3.08657e-12	3.08674e-11	1.69784e-11	2.16082e-11	5.5565e-11	3.88903e-10	1.48618e-09	3.62826e-09	6.83829e-09
0.61506	6.17313e-12	7.71529e-12	6.1782e-12	2.93258e-11	4.93879e-11	1.00308e-10	1.12663e-10	1.34261e-10	2.12967e-10	0.61506	-6.65e-11	-8.64e-11	-9.5e-11	-6.24e-11	2.37e-11	1.77e-10	4.19e-10	8.08e-10	1.33e-09	0.61506	-6.79e-11	-7.41e-11	-8.03e-11	-6.79e-11	4.63e-12	3.75e-10	1.42e-09	3.44e-09	6.38e-09	0.61506	-3.46e-10	-3.26e-10	-3.73e-10	-2.92e-10	-6.33e-11	4.78e-10	1.42e-09	2.83e-09	4.75e-09	0.61506	6.17088e-12	3.54944e-11	3.08589e-11	1.54351e-11	5.86448e-11	3.85821e-10	1.49235e-09	3.62826e-09	6.82441e-09
0.616065	7.71417e-12	2.25211e-15	1.08002e-11	3.85793e-11	6.17291e-11	8.95172e-11	1.18828e-10	1.3118e-10	1.99089e-10	0.616065	-7.36e-11	-9.45e-11	-8.95e-11	-5.41e-11	2.49e-11	1.78e-10	4.23e-10	8.08e-10	1.33e-09	0.616065	-6.79e-11	-7.41e-11	-9.72e-11	-7.56e-11	3.09e-12	3.67e-10	1.42e-09	3.44e-09	6.37e-09	0.616065	-3.49e-10	-3.33e-10	-3.58e-10	-2.99e-10	-6.33e-11	4.71e-10	1.41e-09	2.83e-09	4.73e-09	0.616065	9.25857e-12	3.70366e-11	2.62369e-11	1.54295e-11	6.17308e-11	3.82737e-10	1.4939e-09	3.6298e-09	6.82748e-09
0.61707	3.08769e-12	-1.54385e-12	7.71867e-12	4.01259e-11	6.79022e-11	9.72212e-11	1.11119e-10	1.29631e-10	1.99085e-10	0.61707	-7.71e-11	-8.87e-11	-9.25e-11	-6.26e-11	2.16e-11	1.84e-10	4.24e-10	8.12e-10	1.33e-09	0.61707	-7.25e-11	-7.1e-11	-9.72e-11	-8.33e-11	1.55e-12	3.67e-10	1.44e-09	3.42e-09	6.36e-09	0.61707	-3.41e-10	-3.19e-10	-3.64e-10	-3.04e-10	-5.09e-11	4.74e-10	1.41e-09	2.81e-09	4.74e-09	0.61707	9.26477e-12	3.2409e-11	2.46959e-11	6.17876e-12	6.32769e-11	3.87366e-10	1.49236e-09	3.63289e-09	6.81978e-09
0.618075	1.54722e-12	-4.63098e-12	1.08035e-11	4.32131e-11	6.79039e-11	8.95138e-11	1.11119e-10	1.14211e-10	2.0371e-10	0.618075	-6.53e-11	-9.82e-11	-8.54e-11	-5.99e-11	3.18e-11	1.73e-10	4.2e-10	8.07e-10	1.34e-09	0.618075	-6.94e-11	-6.33e-11	-8.64e-11	-8.03e-11	7.71e-12	3.78e-10	1.42e-09	3.42e-09	6.36e-09	0.618075	-3.38e-10	-3.3e-10	-3.58e-10	-3.1e-10	-4.94e-11	4.65e-10	1.42e-09	2.84e-09	4.72e-09	0.618075	2.31442e-11	2.77791e-11	3.24095e-11	1.23429e-11	7.09798e-11	3.96623e-10	1.49698e-09	3.64832e-09	6.83211e-09
0.61908	1.07934e-11	-1.07979e-11	1.5434e-11	4.93828e-11	6.63612e-11	9.10481e-11	1.17282e-10	1.20375e-10	1.99082e-10	0.61908	-7.07e-11	-8.96e-11	-8.46e-11	-5.98e-11	2.01e-11	1.79e-10	4.19e-10	8.14e-10	1.32e-09	0.61908	-6.33e-11	-6.48e-11	-9.41e-11	-8.03e-11	4.63e-12	3.83e-10	1.42e-09	3.41e-09	6.36e-09	0.61908	-3.21e-10	-3.36e-10	-3.6e-10	-3.07e-10	-5.09e-11	4.55e-10	1.42e-09	2.82e-09	4.74e-09	0.61908	2.31487e-11	2.31521e-11	4.16642e-11	9.25689e-12	4.78502e-11	4.04336e-10	1.48002e-09	3.64679e-09	6.82749e-09
0.620085	-6.16807e-12	-3.09051e-12	2.31453e-11	4.93873e-11	6.48247e-11	7.71709e-11	1.01863e-10	1.23462e-10	1.89829e-10	0.620085	-6.98e-11	-8.23e-11	-9.23e-11	-6.47e-11	2.3e-11	1.78e-10	4.2e-10	8.17e-10	1.34e-09	0.620085	-6.17e-11	-5.71e-11	-8.95e-11	-9.11e-11	6.17e-12	3.86e-10	1.44e-09	3.42e-09	6.35e-09	0.620085	-3.24e-10	-3.4e-10	-3.5e-10	-3.06e-10	-4.48e-11	4.54e-10	1.43e-09	2.82e-09	4.73e-09	0.620085	2.16054e-11	2.62279e-11	3.85872e-11	-1.54103e-12	4.78401e-11	4.01256e-10	1.48155e-09	3.66529e-09	6.82903e-09
0.62109	-9.25857e-12	-6.17426e-12	2.00689e-11	5.55605e-11	8.17856e-11	8.17873e-11	1.04942e-10	1.25005e-10	1.95996e-10	0.62109	-8.07e-11	-8.56e-11	-9.11e-11	-6.19e-11	3.08e-11	1.86e-10	4.31e-10	8.02e-10	1.33e-09	0.62109	-6.33e-11	-5.4e-11	-8.8e-11	-1e-10	6.17e-12	3.9e-10	1.45e-09	3.4e-09	6.33e-09	0.62109	-3.12e-10	-3.55e-10	-3.33e-10	-3.02e-10	-3.86e-11	4.55e-10	1.43e-09	2.83e-09	4.7e-09	0.62109	1.85233e-11	7.72655e-12	4.93828e-11	-6.17144e-12	4.32153e-11	4.04341e-10	1.48926e-09	3.6653e-09	6.82131e-09
0.622095	-9.2642e-12	-1.23418e-11	3.39472e-11	6.78983e-11	7.5622e-11	6.7909e-11	1.03395e-10	1.25009e-10	2.00622e-10	0.622095	-6.51e-11	-9.17e-11	-9.31e-11	-6.02e-11	2.31e-11	1.8e-10	4.31e-10	8.01e-10	1.32e-09	0.622095	-6.94e-11	-5.86e-11	-8.02e-11	-9.72e-11	-9.25e-12	3.95e-10	1.44e-09	3.4e-09	6.33e-09	0.622095	-3.04e-10	-3.61e-10	-3.32e-10	-2.87e-10	-2.62e-11	4.57e-10	1.41e-09	2.84e-09	4.71e-09	0.622095	2.62324e-11	1.69716e-11	5.40087e-11	-6.17032e-12	4.78362e-11	4.08966e-10	1.47539e-09	3.66222e-09	6.81669e-09
0.6231	-2.16015e-11	-6.17257e-12	3.39522e-11	6.32746e-11	7.25338e-11	6.63618e-11	8.95149e-11	1.32721e-10	1.91374e-10	0.6231	-6.59e-11	-8.75e-11	-9.5e-11	-6.07e-11	2.71e-11	1.77e-10	4.32e-10	8.08e-10	1.34e-09	0.6231	-7.56e-11	-5.09e-11	-6.79e-11	-1.02e-10	-6.18e-12	3.77e-10	1.45e-09	3.41e-09	6.34e-09	0.6231	-3.09e-10	-3.55e-10	-3.27e-10	-2.9e-10	-3.55e-11	4.58e-10	1.41e-09	2.83e-09	4.73e-09	0.6231	2.46954e-11	1.38862e-11	4.16709e-11	1.54497e-12	3.70422e-11	4.02799e-10	1.48155e-09	3.68227e-09	6.8244e-09
0.624105	-2.1606e-11	1.54103e-12	3.39517e-11	5.8647e-11	6.79073e-11	6.63601e-11	8.79688e-11	1.37352e-10	2.02167e-10	0.624105	-6.97e-11	-9.21e-11	-9.22e-11	-6.6e-11	2.39e-11	1.85e-10	4.34e-10	8.07e-10	1.33e-09	0.624105	-8.8e-11	-6.64e-11	-6.17e-11	-9.88e-11	-1.7e-11	3.83e-10	1.45e-09	3.43e-09	6.34e-09	0.624105	-2.86e-10	-3.7e-10	-3.24e-10	-2.81e-10	-5.71e-11	4.69e-10	1.4e-09	2.84e-09	4.71e-09	0.624105	3.08567e-11	1.54666e-12	3.54961e-11	1.38828e-11	3.54972e-11	4.01257e-10	1.48001e-09	3.68536e-09	6.83829e-09
0.62511	-2.16077e-11	3.08769e-12	3.24101e-11	6.0183e-11	7.09865e-11	6.32741e-11	9.10492e-11	1.41985e-10	2.05257e-10	0.62511	-5.63e-11	-9.29e-11	-9.56e-11	-7.12e-11	2.87e-11	1.8e-10	4.26e-10	8.14e-10	1.33e-09	0.62511	-8.49e-11	-6.17e-11	-6.64e-11	-8.95e-11	-2.01e-11	3.8e-10	1.46e-09	3.44e-09	6.34e-09	0.62511	-2.72e-10	-3.61e-10	-3.3e-10	-2.78e-10	-5.56e-11	4.72e-10	1.41e-09	2.84e-09	4.75e-09	0.62511	1.2353e-11	-1.54103e-12	3.08685e-11	7.72317e-12	3.85804e-11	4.08968e-10	1.48001e-09	3.68073e-09	6.84292e-09
0.626115	-2.6233e-11	7.71811e-12	3.39534e-11	4.78429e-11	6.17353e-11	5.86504e-11	8.17957e-11	1.55866e-10	2.08346e-10	0.626115	-6.38e-11	-9.03e-11	-8.88e-11	-5.95e-11	2.89e-11	1.8e-10	4.27e-10	8.1e-10	1.33e-09	0.626115	-8.95e-11	-6.94e-11	-5.86e-11	-8.64e-11	-1.85e-11	3.78e-10	1.46e-09	3.44e-09	6.31e-09	0.626115	-2.99e-10	-3.53e-10	-3.38e-10	-2.7e-10	-6.02e-11	4.77e-10	1.41e-09	2.83e-09	4.77e-09	0.626115	1.2348e-11	1.54385e-12	3.39477e-11	2.00576e-11	3.70405e-11	4.10512e-10	1.47847e-09	3.67765e-09	6.85217e-09
0.62712	-2.31493e-11	1.69739e-11	3.85804e-11	3.85855e-11	6.32712e-11	6.94416e-11	7.71692e-11	1.54331e-10	2.19142e-10	0.62712	-7.24e-11	-8.54e-11	-9.95e-11	-5.9e-11	2.46e-11	1.77e-10	4.22e-10	8.13e-10	1.33e-09	0.62712	-8.33e-11	-8.18e-11	-6.48e-11	-7.25e-11	-1.39e-11	3.67e-10	1.46e-09	3.48e-09	6.35e-09	0.62712	-2.99e-10	-3.64e-10	-3.35e-10	-2.72e-10	-5.56e-11	4.77e-10	1.41e-09	2.84e-09	4.76e-09	0.62712	1.69711e-11	6.17257e-12	2.46942e-11	1.85217e-11	4.01259e-11	4.08968e-10	1.47538e-09	3.6869e-09	6.85064e-09
0.628125	-2.00649e-11	2.00644e-11	3.85804e-11	3.85838e-11	5.55576e-11	6.32802e-11	8.64194e-11	1.58955e-10	2.19147e-10	0.628125	-6.84e-11	-8.69e-11	-8.21e-11	-6.63e-11	2.97e-11	1.83e-10	4.26e-10	8.13e-10	1.32e-09	0.628125	-9.26e-11	-9.1e-11	-6.64e-11	-7.72e-11	-2.47e-11	3.69e-10	1.47e-09	3.48e-09	6.36e-09	0.628125	-3.02e-10	-3.44e-10	-3.43e-10	-2.64e-10	-6.17e-11	4.74e-10	1.42e-09	2.85e-09	4.76e-09	0.628125	7.71923e-12	9.26026e-12	2.00627e-11	2.31436e-11	4.47541e-11	4.01256e-10	1.4723e-09	3.68073e-09	6.86452e-09
0.62913	-2.31453e-11	2.77729e-11	3.39528e-11	4.32057e-11	4.63047e-11	7.25321e-11	8.33413e-11	1.55873e-10	2.20688e-10	0.62913	-6.75e-11	-8.16e-11	-9.3e-11	-6.34e-11	2e-11	1.71e-10	4.22e-10	8.06e-10	1.33e-09	0.62913	-8.8e-11	-8.64e-11	-7.1e-11	-6.79e-11	-1.7e-11	3.64e-10	1.46e-09	3.46e-09	6.39e-09	0.62913	-3.02e-10	-3.29e-10	-3.44e-10	-2.73e-10	-6.79e-11	4.72e-10	1.42e-09	2.84e-09	4.75e-09	0.62913	6.1737e-12	1.38884e-11	1.5434e-11	1.2353e-11	4.62996e-11	3.99709e-10	1.48618e-09	3.67919e-09	6.8707e-09
0.630135	-1.5439e-11	1.85228e-11	3.08623e-11	3.08707e-11	5.40099e-11	7.56226e-11	9.10543e-11	1.57409e-10	2.19149e-10	0.630135	-6.81e-11	-8.79e-11	-8.72e-11	-6.92e-11	3.25e-11	1.79e-10	4.29e-10	8.08e-10	1.32e-09	0.630135	-8.95e-11	-9.57e-11	-6.79e-11	-7.25e-11	-1.08e-11	3.52e-10	1.46e-09	3.48e-09	6.38e-09	0.630135	-3.15e-10	-3.24e-10	-3.6e-10	-2.82e-10	-7.25e-11	4.83e-10	1.42e-09	2.84e-09	4.75e-09	0.630135	6.17144e-12	1.54345e-11	1.3889e-11	2.00616e-11	5.09278e-11	3.9354e-10	1.48464e-09	3.67919e-09	6.87688e-09
0.63114	-2.46841e-11	1.85194e-11	1.85222e-11	3.24056e-11	4.78435e-11	8.33351e-11	1.00309e-10	1.41991e-10	2.25315e-10	0.63114	-6.58e-11	-9.4e-11	-8.69e-11	-6.28e-11	2.93e-11	1.81e-10	4.23e-10	8.18e-10	1.34e-09	0.63114	-8.8e-11	-8.8e-11	-7.25e-11	-6.17e-11	-2.01e-11	3.55e-10	1.46e-09	3.49e-09	6.38e-09	0.63114	-3.23e-10	-3.32e-10	-3.55e-10	-2.79e-10	-8.02e-11	4.88e-10	1.43e-09	2.84e-09	4.77e-09	0.63114	1.54554e-12	2.16071e-11	1.08052e-11	2.46908e-11	5.40149e-11	3.93534e-10	1.49081e-09	3.67919e-09	6.8923e-09
0.632145	-1.08052e-11	1.85188e-11	1.38941e-11	2.46982e-11	4.63019e-11	8.48812e-11	9.72319e-11	1.51237e-10	2.20688e-10	0.632145	-6.87e-11	-8.92e-11	-8.4e-11	-6.77e-11	3.23e-11	1.77e-10	4.23e-10	8.14e-10	1.33e-09	0.632145	-8.33e-11	-8.49e-11	-7.1e-11	-6.79e-11	-1.23e-11	3.58e-10	1.46e-09	3.5e-09	6.38e-09	0.632145	-3.27e-10	-3.32e-10	-3.63e-10	-2.62e-10	-8.18e-11	4.85e-10	1.43e-09	2.84e-09	4.76e-09	0.632145	3.086e-12	3.08617e-11	1.38862e-11	2.46903e-11	5.71037e-11	3.85824e-10	1.49081e-09	3.67302e-09	6.90464e-09
0.63315	-3.08882e-12	1.69756e-11	2.15992e-11	3.24073e-11	5.40093e-11	8.79672e-11	1.08026e-10	1.48154e-10	2.12974e-10	0.63315	-6.64e-11	-9.01e-11	-8.08e-11	-6.72e-11	2.37e-11	1.83e-10	4.24e-10	8.1e-10	1.34e-09	0.63315	-7.87e-11	-8.49e-11	-8.18e-11	-6.33e-11	-2.25e-15	3.57e-10	1.46e-09	3.47e-09	6.4e-09	0.63315	-3.27e-10	-3.13e-10	-3.52e-10	-2.72e-10	-7.1e-11	4.82e-10	1.44e-09	2.84e-09	4.76e-09	0.63315	3.08713e-12	2.93246e-11	7.7198e-12	1.85194e-11	6.63567e-11	3.8582e-10	1.49236e-09	3.6761e-09	6.89539e-09
0.634155	-1.54272e-12	1.38896e-11	1.08086e-11	3.54927e-11	4.63047e-11	9.10532e-11	1.09576e-10	1.40435e-10	2.06801e-10	0.634155	-6.41e-11	-8.71e-11	-8.93e-11	-6.94e-11	1.78e-11	1.78e-10	4.27e-10	8.21e-10	1.33e-09	0.634155	-8.33e-11	-8.33e-11	-7.72e-11	-6.94e-11	6.17e-12	3.61e-10	1.45e-09	3.46e-09	6.4e-09	0.634155	-3.36e-10	-3.13e-10	-3.63e-10	-2.86e-10	-6.17e-11	4.82e-10	1.44e-09	2.84e-09	4.75e-09	0.634155	4.62872e-12	3.39522e-11	1.08047e-11	1.23491e-11	6.32769e-11	3.84278e-10	1.50316e-09	3.68073e-09	6.89694e-09
0.63516	1.54497e-12	1.08024e-11	1.54261e-11	3.08679e-11	5.55554e-11	9.25965e-11	1.1883e-10	1.21928e-10	2.02171e-10	0.63516	-6.71e-11	-8.59e-11	-8e-11	-6.4e-11	2.55e-11	1.77e-10	4.26e-10	8.17e-10	1.34e-09	0.63516	-6.95e-11	-6.95e-11	-8.95e-11	-6.33e-11	4.63e-12	3.63e-10	1.44e-09	3.46e-09	6.4e-09	0.63516	-3.38e-10	-3.29e-10	-3.63e-10	-2.9e-10	-6.02e-11	4.81e-10	1.44e-09	2.84e-09	4.76e-09	0.63516	3.08713e-12	3.85781e-11	1.85222e-11	1.38867e-11	6.63578e-11	3.84282e-10	1.50933e-09	3.69153e-09	6.9139e-09
0.636165	9.25632e-12	6.1737e-12	1.55342e-12	3.24118e-11	5.71026e-11	9.25981e-11	1.20372e-10	1.26549e-10	2.00625e-10	0.636165	-6.04e-11	-8.64e-11	-9.13e-11	-5.59e-11	1.77e-11	1.78e-10	4.28e-10	8.2e-10	1.34e-09	0.636165	-6.94e-11	-7.25e-11	-9.72e-11	-7.56e-11	9.26e-12	3.75e-10	1.44e-09	3.46e-09	6.4e-09	0.636165	-3.46e-10	-3.3e-10	-3.73e-10	-3.07e-10	-6.33e-11	4.68e-10	1.44e-09	2.81e-09	4.76e-09	0.636165	3.08882e-12	3.24084e-11	3.39449e-11	7.71754e-12	6.0192e-11	3.96618e-10	1.5155e-09	3.68536e-09	6.90927e-09
[truncated: 265 more rows]
[truncated: 10 more columns]

## Sheet: Fig. 6 E,F
Current densities (in pA/pF) for the indicated hTMEM206 mutants, transfected into TMEM206 KO cells at indicated pH values. Replicates are from individual cells. Values for pH7.4 and pH5 within one row (same mutant) are from the same cell.
WT		V80C		A81C		R87C		L310C		A321C
[truncated: 16 more rows]
