# Supplementary material for: Identification of TMEM206 proteins as pore of PAORAC/ASOR acid-sensitive chloride channels
Source: eLife. 2019 Jul 18;8:e49187. doi: 10.7554/eLife.49187 (PMC6663466; doi:10.7554/eLife.49187)
Supplement: Figure 7—source data 1. [file elife-49187-fig7-data1.xlsx]

## Sheet: Fig. 7A-D
Currents (in nA) as a function of voltage with the indicated extracellular solutions and intracellular NMDG-Cl, and for indicated hTMEM206 mutants, transfected into TMEM206 KO cells at pH5 (except bg control)
	WT			L84C			I307W			L315D
Voltage (V)	NaCl	Na2SO4	NaI	NaCl	Na2SO4	NaI	NaCl	Na2SO4	NaI	NaCl	Na2SO4	NaI
-59.75	-0.861	-0.0463	-0.89	-0.816	-0.105	-0.493	-0.531	-0.154	-0.205	-1.46	-0.0751	-0.482
-59.5	-0.872	-0.0401	-0.886	-0.826	-0.113	-0.483	-0.534	-0.159	-0.208	-1.46	-0.0721	-0.414
-59.16	-0.875	-0.0324	-0.887	-0.829	-0.111	-0.47	-0.556	-0.147	-0.21	-1.45	-0.0763	-0.448
-58.75	-0.883	-0.0401	-0.901	-0.841	-0.116	-0.47	-0.56	-0.16	-0.204	-1.45	-0.0661	-0.455
-58.53	-0.897	-0.0324	-0.898	-0.829	-0.114	-0.462	-0.549	-0.167	-0.205	-1.43	-0.0706	-0.454
-58.12	-0.903	-0.0324	-0.883	-0.836	-0.113	-0.468	-0.569	-0.174	-0.201	-1.41	-0.0694	-0.436
-57.94	-0.906	-0.037	-0.897	-0.841	-0.116	-0.469	-0.551	-0.185	-0.199	-1.4	-0.0683	-0.437
-57.56	-0.92	-0.0278	-0.892	-0.832	-0.114	-0.471	-0.562	-0.161	-0.194	-1.39	-0.0594	-0.448
-57.25	-0.911	-0.0324	-0.887	-0.843	-0.116	-0.465	-0.563	-0.168	-0.174	-1.39	-0.0608	-0.452
-56.94	-0.934	-0.0386	-0.886	-0.846	-0.119	-0.464	-0.56	-0.181	-0.181	-1.39	-0.0752	-0.444
-56.5	-0.935	-0.037	-0.894	-0.838	-0.114	-0.455	-0.58	-0.17	-0.187	-1.39	-0.0639	-0.436
-56.22	-0.946	-0.0463	-0.883	-0.832	-0.113	-0.465	-0.593	-0.162	-0.188	-1.38	-0.0746	-0.451
-55.97	-0.928	-0.0525	-0.886	-0.832	-0.113	-0.457	-0.59	-0.174	-0.199	-1.38	-0.0657	-0.448
-55.62	-0.932	-0.0602	-0.894	-0.835	-0.111	-0.464	-0.579	-0.174	-0.196	-1.38	-0.0589	-0.428
-55.34	-0.931	-0.0586	-0.889	-0.838	-0.113	-0.46	-0.58	-0.171	-0.181	-1.36	-0.0576	-0.421
-54.99	-0.929	-0.0478	-0.898	-0.833	-0.116	-0.451	-0.576	-0.165	-0.207	-1.35	-0.0603	-0.431
-54.65	-0.937	-0.0463	-0.907	-0.83	-0.105	-0.441	-0.568	-0.168	-0.198	-1.33	-0.0675	-0.441
-54.27	-0.946	-0.054	-0.911	-0.85	-0.1	-0.445	-0.546	-0.159	-0.199	-1.33	-0.0672	-0.429
-54.02	-0.948	-0.0478	-0.911	-0.841	-0.105	-0.441	-0.565	-0.157	-0.194	-1.32	-0.0735	-0.403
-53.71	-0.952	-0.034	-0.911	-0.844	-0.108	-0.44	-0.56	-0.156	-0.198	-1.32	-0.0622	-0.409
-53.3	-0.957	-0.0401	-0.918	-0.841	-0.0957	-0.426	-0.568	-0.167	-0.204	-1.29	-0.0719	-0.414
-52.99	-0.957	-0.0293	-0.924	-0.858	-0.102	-0.427	-0.566	-0.161	-0.201	-1.29	-0.0657	-0.414
-52.71	-0.968	-0.0293	-0.924	-0.861	-0.105	-0.41	-0.573	-0.156	-0.205	-1.3	-0.0623	-0.389
-52.43	-0.994	-0.0278	-0.923	-0.864	-0.0957	-0.417	-0.566	-0.151	-0.207	-1.29	-0.0598	-0.392
-52.08	-0.999	-0.0262	-0.909	-0.87	-0.111	-0.413	-0.577	-0.159	-0.194	-1.29	-0.0628	-0.393
-51.68	-1	-0.0293	-0.915	-0.881	-0.108	-0.416	-0.571	-0.168	-0.196	-1.27	-0.0571	-0.367
-51.43	-1.02	-0.0278	-0.906	-0.875	-0.113	-0.414	-0.569	-0.17	-0.199	-1.25	-0.0499	-0.376
-51.11	-1.02	-0.017	-0.892	-0.875	-0.111	-0.411	-0.576	-0.17	-0.194	-1.24	-0.0504	-0.393
-50.71	-1.03	-0.0262	-0.904	-0.881	-0.105	-0.422	-0.577	-0.176	-0.182	-1.24	-0.061	-0.392
-50.46	-1.03	-0.037	-0.897	-0.875	-0.114	-0.423	-0.58	-0.17	-0.182	-1.24	-0.063	-0.433
-50.08	-1.04	-0.0417	-0.887	-0.867	-0.113	-0.406	-0.579	-0.17	-0.177	-1.22	-0.0656	-0.37
-49.8	-1.05	-0.0417	-0.884	-0.874	-0.108	-0.405	-0.6	-0.159	-0.177	-1.22	-0.0593	-0.39
-49.49	-1.05	-0.0401	-0.88	-0.883	-0.105	-0.397	-0.597	-0.176	-0.173	-1.21	-0.0504	-0.372
-49.17	-1.04	-0.0525	-0.877	-0.883	-0.0988	-0.393	-0.59	-0.168	-0.177	-1.21	-0.0559	-0.361
-48.83	-1.04	-0.0432	-0.881	-0.884	-0.102	-0.407	-0.579	-0.168	-0.181	-1.22	-0.0514	-0.359
-48.52	-1.05	-0.0432	-0.884	-0.878	-0.108	-0.382	-0.573	-0.168	-0.193	-1.19	-0.051	-0.375
-48.23	-1.06	-0.0417	-0.892	-0.878	-0.106	-0.396	-0.58	-0.165	-0.181	-1.18	-0.0443	-0.372
-47.86	-1.06	-0.0432	-0.89	-0.884	-0.0988	-0.381	-0.574	-0.161	-0.187	-1.18	-0.0456	-0.367
-47.55	-1.07	-0.0324	-0.897	-0.889	-0.0957	-0.378	-0.568	-0.164	-0.191	-1.18	-0.0627	-0.343
-47.26	-1.08	-0.0309	-0.887	-0.89	-0.0911	-0.38	-0.574	-0.147	-0.198	-1.17	-0.0544	-0.363
-46.92	-1.07	-0.0355	-0.884	-0.903	-0.0941	-0.366	-0.58	-0.156	-0.196	-1.16	-0.0518	-0.359
-46.61	-1.07	-0.0293	-0.897	-0.884	-0.0911	-0.352	-0.582	-0.16	-0.188	-1.15	-0.0518	-0.336
-46.26	-1.1	-0.0216	-0.895	-0.89	-0.0895	-0.347	-0.582	-0.148	-0.193	-1.15	-0.0545	-0.332
-45.92	-1.1	-0.0185	-0.886	-0.9	-0.0941	-0.354	-0.583	-0.168	-0.191	-1.14	-0.0552	-0.328
-45.57	-1.11	-0.0185	-0.901	-0.906	-0.0972	-0.349	-0.579	-0.167	-0.187	-1.12	-0.0489	-0.313
-45.29	-1.11	-0.0201	-0.883	-0.892	-0.0957	-0.341	-0.566	-0.165	-0.182	-1.11	-0.0447	-0.303
-44.95	-1.12	-0.0247	-0.892	-0.901	-0.0957	-0.34	-0.594	-0.164	-0.168	-1.1	-0.0422	-0.324
-44.67	-1.13	-0.0154	-0.88	-0.903	-0.105	-0.344	-0.59	-0.154	-0.177	-1.09	-0.0457	-0.333
-44.38	-1.13	-0.0247	-0.874	-0.912	-0.102	-0.346	-0.585	-0.165	-0.173	-1.09	-0.0424	-0.327
-44.07	-1.13	-0.0262	-0.877	-0.903	-0.1	-0.347	-0.603	-0.161	-0.168	-1.08	-0.0507	-0.325
-43.7	-1.13	-0.0278	-0.86	-0.9	-0.102	-0.341	-0.607	-0.162	-0.161	-1.07	-0.0517	-0.314
-43.35	-1.14	-0.0262	-0.877	-0.9	-0.108	-0.343	-0.631	-0.161	-0.153	-1.08	-0.0593	-0.32
-43.01	-1.14	-0.0401	-0.861	-0.907	-0.0972	-0.345	-0.625	-0.161	-0.173	-1.07	-0.0381	-0.318
-42.72	-1.14	-0.0448	-0.852	-0.895	-0.105	-0.336	-0.63	-0.162	-0.162	-1.07	-0.0405	-0.302
-42.41	-1.11	-0.0463	-0.855	-0.89	-0.102	-0.344	-0.622	-0.165	-0.159	-1.08	-0.0422	-0.309
-42.13	-1.13	-0.0448	-0.855	-0.897	-0.1	-0.325	-0.611	-0.162	-0.156	-1.05	-0.0418	-0.324
-41.72	-1.13	-0.034	-0.852	-0.894	-0.0957	-0.322	-0.611	-0.151	-0.154	-1.04	-0.0474	-0.321
-41.47	-1.13	-0.0386	-0.86	-0.898	-0.0864	-0.325	-0.605	-0.154	-0.162	-1.04	-0.0424	-0.297
-41.13	-1.12	-0.0247	-0.863	-0.898	-0.088	-0.315	-0.6	-0.16	-0.171	-1.02	-0.0503	-0.298
-40.75	-1.13	-0.0293	-0.863	-0.907	-0.0895	-0.311	-0.603	-0.15	-0.174	-1.02	-0.0497	-0.308
-40.5	-1.14	-0.0293	-0.858	-0.9	-0.088	-0.301	-0.603	-0.153	-0.182	-1.01	-0.0424	-0.276
-40.13	-1.13	-0.0154	-0.872	-0.904	-0.0911	-0.293	-0.597	-0.154	-0.17	-1	-0.0425	-0.271
-39.81	-1.14	-0.0154	-0.855	-0.907	-0.088	-0.291	-0.599	-0.139	-0.174	-1.01	-0.0391	-0.271
-39.5	-1.15	-0.00772	-0.853	-0.914	-0.0833	-0.282	-0.607	-0.154	-0.17	-1.02	-0.0382	-0.273
-39.13	-1.17	-0.0201	-0.836	-0.915	-0.0957	-0.275	-0.596	-0.159	-0.168	-0.996	-0.0505	-0.274
-38.88	-1.18	-0.0123	-0.827	-0.914	-0.0941	-0.269	-0.61	-0.154	-0.162	-0.987	-0.0416	-0.253
-38.56	-1.19	-0.0108	-0.827	-0.914	-0.0911	-0.263	-0.605	-0.162	-0.151	-0.985	-0.0299	-0.258
-38.19	-1.2	-0.0185	-0.823	-0.915	-0.0911	-0.274	-0.603	-0.156	-0.147	-0.964	-0.0365	-0.276
-37.9	-1.22	-0.0154	-0.812	-0.911	-0.0941	-0.262	-0.627	-0.165	-0.151	-0.974	-0.0425	-0.277
-37.53	-1.2	-0.0247	-0.813	-0.915	-0.0864	-0.263	-0.617	-0.159	-0.15	-0.969	-0.0445	-0.263
-37.25	-1.21	-0.0293	-0.81	-0.917	-0.0911	-0.265	-0.653	-0.165	-0.145	-0.957	-0.0471	-0.257
-36.93	-1.21	-0.037	-0.798	-0.914	-0.0957	-0.286	-0.648	-0.161	-0.136	-0.948	-0.0439	-0.249
-36.59	-1.22	-0.0355	-0.795	-0.914	-0.0864	-0.27	-0.631	-0.17	-0.147	-0.946	-0.0304	-0.256
-36.25	-1.22	-0.0386	-0.787	-0.907	-0.0849	-0.248	-0.648	-0.176	-0.142	-0.909	-0.0297	-0.247
-36	-1.21	-0.037	-0.784	-0.9	-0.0941	-0.264	-0.627	-0.171	-0.142	-0.951	-0.0299	-0.248
-35.62	-1.21	-0.0417	-0.779	-0.904	-0.0988	-0.245	-0.627	-0.17	-0.14	-0.883	-0.0326	-0.259
-35.34	-1.2	-0.0401	-0.781	-0.897	-0.0864	-0.239	-0.613	-0.164	-0.14	-0.922	-0.0428	-0.258
-34.96	-1.2	-0.0278	-0.775	-0.892	-0.0895	-0.249	-0.613	-0.162	-0.157	-0.898	-0.0362	-0.236
-34.65	-1.21	-0.0278	-0.77	-0.904	-0.0833	-0.237	-0.613	-0.161	-0.147	-0.903	-0.0394	-0.214
-34.31	-1.21	-0.017	-0.77	-0.904	-0.0849	-0.226	-0.614	-0.159	-0.147	-0.91	-0.0435	-0.236
-33.99	-1.22	-0.0247	-0.775	-0.906	-0.0818	-0.23	-0.625	-0.171	-0.144	-0.886	-0.0362	-0.225
-33.68	-1.22	-0.0124	-0.767	-0.914	-0.0833	-0.209	-0.62	-0.165	-0.147	-0.89	-0.0285	-0.218
-33.43	-1.22	-0.0139	-0.767	-0.906	-0.0941	-0.21	-0.622	-0.17	-0.148	-0.882	-0.0267	-0.211
-33.02	-1.22	-0.0108	-0.764	-0.903	-0.0895	-0.214	-0.625	-0.165	-0.147	-0.878	-0.0336	-0.228
-32.74	-1.24	-0.0123	-0.752	-0.914	-0.0833	-0.204	-0.628	-0.167	-0.133	-0.859	-0.0319	-0.219
-32.43	-1.23	-0.0139	-0.752	-0.907	-0.088	-0.2	-0.64	-0.168	-0.136	-0.863	-0.0216	-0.2
-32.08	-1.22	-0.00926	-0.741	-0.909	-0.0895	-0.188	-0.651	-0.17	-0.144	-0.844	-0.0284	-0.204
-31.77	-1.24	-0.00464	-0.725	-0.92	-0.088	-0.192	-0.64	-0.171	-0.119	-0.874	-0.0257	-0.225
-31.46	-1.25	-0.017	-0.719	-0.906	-0.0895	-0.182	-0.633	-0.168	-0.125	-0.871	-0.0317	-0.259
-31.11	-1.25	-0.00927	-0.699	-0.915	-0.0926	-0.19	-0.661	-0.162	-0.125	-0.821	-0.0246	-0.242
-30.77	-1.25	-0.0247	-0.694	-0.895	-0.0926	-0.2	-0.64	-0.168	-0.113	-0.824	-0.0302	-0.23
-30.49	-1.25	-0.017	-0.688	-0.9	-0.0895	-0.181	-0.653	-0.167	-0.113	-0.822	-0.0224	-0.199
-30.14	-1.25	-0.0355	-0.673	-0.903	-0.0911	-0.173	-0.647	-0.17	-0.12	-0.814	-0.0212	-0.216
-29.86	-1.24	-0.0262	-0.668	-0.889	-0.0911	-0.196	-0.656	-0.184	-0.12	-0.821	-0.0236	-0.187
-29.58	-1.24	-0.0309	-0.674	-0.886	-0.0864	-0.181	-0.636	-0.174	-0.108	-0.824	-0.0314	-0.2
-29.2	-1.23	-0.0309	-0.653	-0.897	-0.0864	-0.181	-0.645	-0.167	-0.11	-0.801	-0.0201	-0.211
-28.86	-1.22	-0.0324	-0.65	-0.883	-0.088	-0.161	-0.616	-0.171	-0.122	-0.806	-0.0211	-0.21
-28.55	-1.22	-0.037	-0.662	-0.875	-0.0818	-0.157	-0.619	-0.162	-0.12	-0.737	-0.0253	-0.197
-28.17	-1.22	-0.0216	-0.648	-0.881	-0.0772	-0.147	-0.628	-0.168	-0.111	-0.778	-0.0285	-0.176
-27.92	-1.22	-0.017	-0.645	-0.88	-0.0833	-0.14	-0.619	-0.167	-0.127	-0.793	-0.031	-0.187
-27.61	-1.22	-0.0139	-0.639	-0.866	-0.0772	-0.138	-0.636	-0.167	-0.119	-0.777	-0.0283	-0.186
-27.23	-1.23	-0.00926	-0.644	-0.877	-0.0772	-0.12	-0.627	-0.168	-0.117	-0.778	-0.0253	-0.19
-26.92	-1.23	-0.00309	-0.636	-0.878	-0.0802	-0.143	-0.64	-0.162	-0.119	-0.773	-0.0342	-0.158
-26.64	-1.23	-0.00617	-0.63	-0.878	-0.0772	-0.121	-0.633	-0.174	-0.108	-0.766	-0.0241	-0.172
-26.23	-1.23	-0.00926	-0.628	-0.88	-0.0802	-0.123	-0.628	-0.181	-0.102	-0.748	-0.0257	-0.171
-25.98	-1.23	-0.00463	-0.608	-0.883	-0.0803	-0.117	-0.627	-0.182	-0.0941	-0.737	-0.0108	-0.156
-25.67	-1.24	-0.00617	-0.594	-0.886	-0.0787	-0.113	-0.636	-0.179	-0.0864	-0.736	-0.0192	-0.155
-25.32	-1.23	-6.26e-06	-0.588	-0.872	-0.0833	-0.102	-0.645	-0.165	-0.0803	-0.734	-0.0197	-0.185
-24.98	-1.23	-0.0108	-0.571	-0.878	-0.0787	-0.102	-0.637	-0.167	-0.0818	-0.729	-0.0288	-0.179
-24.73	-1.23	-0.00618	-0.559	-0.877	-0.0818	-0.105	-0.642	-0.168	-0.0818	-0.706	-0.0309	-0.157
-24.35	-1.23	-0.00926	-0.549	-0.872	-0.0772	-0.099	-0.648	-0.171	-0.0725	-0.711	-0.0303	-0.157
-24.01	-1.22	-0.017	-0.534	-0.863	-0.0818	-0.0892	-0.648	-0.185	-0.0648	-0.719	-0.0194	-0.155
-23.73	-1.22	-0.0278	-0.526	-0.852	-0.0895	-0.0832	-0.645	-0.182	-0.0679	-0.706	-0.0166	-0.163
-23.32	-1.21	-0.0278	-0.532	-0.849	-0.0741	-0.0812	-0.64	-0.181	-0.0772	-0.718	-0.0114	-0.188
-23.04	-1.2	-0.0262	-0.509	-0.84	-0.088	-0.074	-0.634	-0.182	-0.0679	-0.671	-0.0253	-0.147
-22.76	-1.19	-0.0262	-0.495	-0.827	-0.0818	-0.0774	-0.636	-0.177	-0.0602	-0.688	-0.014	-0.173
-22.38	-1.17	-0.0154	-0.495	-0.821	-0.0818	-0.0593	-0.613	-0.177	-0.0725	-0.646	-0.0149	-0.173
-22.13	-1.17	-0.0139	-0.489	-0.824	-0.071	-0.0615	-0.62	-0.177	-0.0556	-0.687	-0.016	-0.155
-21.79	-1.16	-0.0201	-0.475	-0.821	-0.0772	-0.0535	-0.614	-0.174	-0.0679	-0.671	-0.0208	-0.142
-21.47	-1.16	-0.00926	-0.46	-0.809	-0.071	-0.0569	-0.607	-0.167	-0.0633	-0.679	-0.0233	-0.15
-21.13	-1.16	-5.69e-06	-0.471	-0.812	-0.0679	-0.0396	-0.616	-0.171	-0.0648	-0.659	-0.0221	-0.123
-20.85	-1.14	-0.00617	-0.465	-0.799	-0.0679	-0.0341	-0.61	-0.165	-0.0679	-0.672	-0.0191	-0.138
-20.47	-1.14	-0.00154	-0.455	-0.792	-0.0756	-0.0263	-0.61	-0.168	-0.0525	-0.666	-0.0142	-0.127
-20.22	-1.15	0.00463	-0.438	-0.801	-0.0802	-0.0161	-0.605	-0.173	-0.0448	-0.645	-0.0195	-0.132
-19.84	-1.15	0.00617	-0.432	-0.792	-0.0756	-0.0187	-0.596	-0.181	-0.0355	-0.637	-0.00715	-0.135
-19.44	-1.15	0.00463	-0.411	-0.79	-0.0679	-0.0107	-0.597	-0.188	-0.0324	-0.642	-0.00616	-0.0931
-19.16	-1.14	0.00617	-0.404	-0.799	-0.0648	-0.0103	-0.61	-0.181	-0.0216	-0.65	-0.013	-0.134
-18.87	-1.14	-0.00617	-0.384	-0.796	-0.0741	-0.00335	-0.603	-0.19	-0.0139	-0.615	-0.0119	-0.139
-18.53	-1.13	-0.00617	-0.367	-0.789	-0.0679	0.0164	-0.593	-0.184	-0.0123	-0.616	-0.0134	-0.148
-18.28	-1.13	0.00308	-0.358	-0.781	-0.0802	0.0106	-0.591	-0.191	-0.00309	-0.611	-0.0247	-0.125
-17.87	-1.13	-0.00925	-0.336	-0.772	-0.0864	0.00278	-0.608	-0.196	-0.00309	-0.603	-0.0211	-0.121
-17.53	-1.11	-0.00772	-0.327	-0.765	-0.0756	0.0251	-0.608	-0.193	1.71e-06	-0.613	-0.0102	-0.144
-17.28	-1.1	-0.017	-0.323	-0.756	-0.0802	0.0265	-0.602	-0.198	0.00771	-0.6	-0.00586	-0.124
-16.96	-1.09	-0.0201	-0.302	-0.747	-0.071	0.0363	-0.588	-0.21	0.00927	-0.598	-0.00364	-0.111
-16.59	-1.08	-0.0124	-0.287	-0.73	-0.071	0.0297	-0.582	-0.199	0.0278	-0.597	-0.00678	-0.109
-16.28	-1.06	-0.017	-0.273	-0.716	-0.0772	0.0371	-0.577	-0.196	0.0216	-0.577	-0.00786	-0.123
-15.99	-1.05	-0.0108	-0.264	-0.707	-0.071	0.0445	-0.569	-0.201	0.0185	-0.592	-0.00415	-0.115
-15.62	-1.04	-0.0139	-0.25	-0.715	-0.0664	0.0546	-0.552	-0.198	0.0262	-0.572	-0.00373	-0.105
-15.4	-1.02	-0.00464	-0.247	-0.699	-0.0741	0.0548	-0.542	-0.187	0.0216	-0.564	-0.00232	-0.105
-15.06	-1.01	-0.0108	-0.233	-0.694	-0.071	0.059	-0.531	-0.184	0.017	-0.571	-0.00329	-0.0934
-14.77	-1	-1.71e-06	-0.235	-0.679	-0.0694	0.0731	-0.556	-0.187	0.0231	-0.565	-0.0114	-0.111
-14.43	-0.995	0.00617	-0.221	-0.661	-0.0694	0.0785	-0.534	-0.188	0.0262	-0.549	-0.0253	-0.0849
-14.05	-0.992	0.00154	-0.205	-0.667	-0.0679	0.0953	-0.536	-0.187	0.037	-0.554	-0.00329	-0.0985
-13.8	-0.982	1.71e-06	-0.196	-0.671	-0.071	0.0869	-0.529	-0.191	0.0432	-0.545	-0.00706	-0.1
-13.49	-0.985	0.00309	-0.176	-0.662	-0.071	0.101	-0.52	-0.194	0.054	-0.565	-0.00394	-0.0904
-13.05	-0.971	0.0123	-0.157	-0.664	-0.0679	0.109	-0.522	-0.201	0.0602	-0.559	-0.00136	-0.0747
-12.77	-0.965	0.00926	-0.145	-0.662	-0.0725	0.111	-0.522	-0.211	0.0756	-0.52	0.00103	-0.0918
-12.46	-0.955	0.0123	-0.123	-0.65	-0.0679	0.121	-0.528	-0.194	0.0787	-0.528	-0.00407	-0.1
-12.18	-0.937	0.00617	-0.108	-0.645	-0.0679	0.132	-0.526	-0.193	0.091	-0.526	-0.00553	-0.1
-11.8	-0.932	0.00463	-0.088	-0.636	-0.0679	0.131	-0.505	-0.205	0.0926	-0.503	-0.0046	-0.112
-11.42	-0.914	0.00154	-0.0679	-0.633	-0.0725	0.149	-0.511	-0.204	0.106	-0.499	-0.00569	-0.0958
-11.14	-0.897	-0.0123	-0.0586	-0.607	-0.071	0.147	-0.506	-0.196	0.113	-0.509	-0.00101	-0.0955
-10.89	-0.886	-0.0108	-0.0309	-0.602	-0.071	0.154	-0.489	-0.208	0.117	-0.498	0.00172	-0.0866
-10.55	-0.867	-0.017	-0.0262	-0.585	-0.0695	0.151	-0.492	-0.21	0.122	-0.503	0.007	-0.0817
-10.17	-0.849	-0.0154	-0.0108	-0.576	-0.0756	0.158	-0.472	-0.204	0.133	-0.471	0.00846	-0.0595
-9.89	-0.836	-0.00618	0.00926	-0.556	-0.0679	0.17	-0.469	-0.207	0.131	-0.48	0.00429	-0.0969
-9.61	-0.812	-0.0139	0.0216	-0.545	-0.071	0.176	-0.457	-0.215	0.139	-0.472	-0.00428	-0.0922
-9.23	-0.807	-4.55e-06	0.0417	-0.532	-0.0617	0.168	-0.452	-0.205	0.139	-0.466	0.00392	-0.0715
-8.89	-0.787	0.00154	0.0463	-0.52	-0.0664	0.19	-0.435	-0.21	0.142	-0.467	-0.00382	-0.0578
-8.61	-0.77	0.00617	0.0694	-0.515	-0.0617	0.206	-0.421	-0.205	0.159	-0.469	-0.00621	-0.0738
-8.2	-0.745	7.96e-06	0.0787	-0.503	-0.0664	0.211	-0.417	-0.208	0.15	-0.46	-0.00194	-0.062
-7.95	-0.727	0.0154	0.088	-0.489	-0.0648	0.21	-0.409	-0.211	0.161	-0.455	-0.0127	-0.0654
-7.67	-0.715	0.017	0.103	-0.483	-0.0648	0.225	-0.401	-0.205	0.167	-0.451	-0.00611	-0.0558
-7.32	-0.699	0.0123	0.12	-0.48	-0.0694	0.219	-0.394	-0.213	0.182	-0.439	0.0086	-0.0622
-7.01	-0.702	0.0123	0.136	-0.471	-0.0679	0.246	-0.375	-0.21	0.193	-0.432	0.0101	-0.0598
-6.67	-0.678	0.00926	0.164	-0.457	-0.0664	0.246	-0.375	-0.222	0.208	-0.431	0.00641	-0.0347
-6.39	-0.665	0.0123	0.174	-0.466	-0.0633	0.255	-0.353	-0.228	0.21	-0.439	-0.00356	-0.0456
-6.01	-0.653	0.0216	0.204	-0.46	-0.0617	0.262	-0.356	-0.228	0.227	-0.415	0.00517	-0.06
-5.7	-0.628	0.0108	0.222	-0.444	-0.0679	0.279	-0.353	-0.219	0.235	-0.408	-0.000972	-0.0844
-5.41	-0.627	0.00926	0.239	-0.44	-0.071	0.28	-0.335	-0.228	0.248	-0.402	0.00453	-0.0774
-5.04	-0.603	0.00463	0.275	-0.42	-0.0725	0.292	-0.344	-0.235	0.25	-0.398	-0.00431	-0.0413
-4.79	-0.585	0.00308	0.287	-0.398	-0.0648	0.294	-0.329	-0.227	0.261	-0.417	0.00191	-0.061
-4.41	-0.566	-0.00926	0.31	-0.39	-0.0664	0.299	-0.31	-0.225	0.272	-0.408	0.0231	-0.0475
-4.07	-0.549	-0.0108	0.324	-0.372	-0.071	0.305	-0.306	-0.238	0.282	-0.393	0.00371	-0.0366
-3.76	-0.517	-0.00926	0.341	-0.355	-0.0664	0.313	-0.29	-0.241	0.296	-0.403	0.00987	-0.0406
-3.44	-0.508	-0.00617	0.363	-0.335	-0.0602	0.316	-0.272	-0.239	0.301	-0.396	0.0104	-0.0581
-3.07	-0.477	-1.14e-06	0.38	-0.316	-0.0679	0.336	-0.262	-0.236	0.312	-0.383	0.00495	-0.0551
-2.79	-0.457	0.00309	0.406	-0.289	-0.0648	0.335	-0.241	-0.228	0.313	-0.379	0.0147	-0.0392
-2.41	-0.431	0.00463	0.412	-0.278	-0.0571	0.341	-0.218	-0.216	0.327	-0.365	0.00855	-0.0332
-2.13	-0.403	5.12e-06	0.435	-0.261	-0.0509	0.35	-0.208	-0.225	0.326	-0.372	0.0031	-0.0201
-1.82	-0.384	0.00926	0.446	-0.244	-0.0617	0.361	-0.191	-0.224	0.335	-0.355	0.00432	-0.0346
-1.5	-0.366	0.0139	0.466	-0.238	-0.0525	0.375	-0.182	-0.23	0.35	-0.365	-0.00485	-0.0334
-1.19	-0.356	0.0154	0.494	-0.216	-0.0617	0.382	-0.173	-0.23	0.355	-0.365	0.00636	-0.0207
-0.87641	-0.329	0.0185	0.491	-0.213	-0.0602	0.389	-0.151	-0.228	0.378	-0.35	0.0118	-0.0225
-0.50081	-0.318	0.0154	0.52	-0.207	-0.0602	0.404	-0.134	-0.245	0.392	-0.342	0.0149	-0.02
-0.1878	-0.289	0.0201	0.542	-0.193	-0.0633	0.406	-0.119	-0.247	0.407	-0.326	0.00966	-0.00102
0.125201	-0.285	0.0231	0.569	-0.182	-0.0664	0.417	-0.108	-0.25	0.42	-0.341	0.0166	-0.0102
0.375604	-0.253	0.0185	0.591	-0.187	-0.0617	0.431	-0.0957	-0.256	0.438	-0.327	0.0144	-0.0383
0.719908	-0.244	0.0154	0.608	-0.164	-0.0602	0.439	-0.0833	-0.261	0.451	-0.333	0.000547	-0.0348
0.970311	-0.219	0.0139	0.636	-0.151	-0.0679	0.444	-0.0679	-0.265	0.468	-0.319	0.0168	-0.0217
1.35	-0.202	0.017	0.665	-0.123	-0.0679	0.452	-0.0648	-0.27	0.483	-0.298	0.0187	-0.0271
1.72	-0.176	0.00463	0.691	-0.111	-0.0633	0.473	-0.0432	-0.264	0.485	-0.314	0.00479	0.00102
2.03	-0.147	0.00308	0.71	-0.0957	-0.0602	0.475	-0.0278	-0.264	0.506	-0.307	0.0321	-0.0102
2.35	-0.123	-0.00771	0.73	-0.0725	-0.0633	0.482	-0.00309	-0.261	0.523	-0.301	0.0159	-0.00849
2.72	-0.0957	0.00308	0.762	-0.0463	-0.0633	0.49	0.0108	-0.264	0.536	-0.305	0.0189	-0.000232
2.94	-0.0633	0.00308	0.779	-0.0278	-0.0602	0.496	0.034	-0.258	0.549	-0.253	0.0103	-0.0178
3.29	-0.037	-0.00462	0.81	-0.00772	-0.0694	0.502	0.0556	-0.259	0.551	-0.296	0.0142	-0.0149
3.63	-6.26e-06	0.00463	0.83	0.0154	-0.0556	0.513	0.071	-0.259	0.563	-0.282	0.0164	-0.00675
3.98	0.0201	0.00155	0.844	0.0401	-0.0494	0.521	0.0911	-0.245	0.579	-0.28	0.0164	0.000621
4.23	0.0417	0.0154	0.861	0.0648	-0.0494	0.523	0.116	-0.258	0.593	-0.273	0.0172	-0.000109
4.57	0.0802	0.0139	0.877	0.0926	-0.0494	0.542	0.14	-0.265	0.599	-0.269	0.0153	-0.00697
4.91	0.105	0.0201	0.894	0.106	-0.0525	0.547	0.162	-0.267	0.605	-0.27	0.0153	-0.0088
5.23	0.128	0.0124	0.928	0.117	-0.0525	0.56	0.177	-0.265	0.63	-0.268	0.0173	0.00546
5.51	0.14	0.0247	0.94	0.125	-0.0571	0.573	0.198	-0.282	0.628	-0.259	0.015	0.000628
5.92	0.174	0.0185	0.968	0.14	-0.0602	0.589	0.222	-0.279	0.657	-0.25	0.0196	0.0139
6.2	0.194	0.0278	1	0.148	-0.0586	0.605	0.248	-0.287	0.678	-0.231	0.0205	0.0344
6.51	0.224	0.0278	1.01	0.157	-0.0509	0.61	0.264	-0.292	0.696	-0.231	0.0305	0.0114
6.85	0.235	0.0185	1.04	0.168	-0.0586	0.628	0.276	-0.281	0.719	-0.237	0.0221	0.00483
7.14	0.269	0.0247	1.08	0.187	-0.0586	0.641	0.299	-0.292	0.73	-0.226	0.0189	-0.0132
7.51	0.289	0.0216	1.1	0.199	-0.0509	0.645	0.318	-0.299	0.75	-0.217	0.0136	0.00922
7.83	0.312	0.0124	1.13	0.23	-0.0494	0.651	0.326	-0.307	0.773	-0.206	0.017	0.0331
8.2	0.343	0.017	1.16	0.25	-0.0556	0.66	0.353	-0.296	0.79	-0.226	0.0155	0.0256
8.45	0.367	0.00309	1.19	0.27	-0.0525	0.676	0.372	-0.31	0.798	-0.221	0.0244	0.0145
8.73	0.398	0.00771	1.21	0.304	-0.0525	0.675	0.4	-0.304	0.818	-0.227	0.0252	0.0239
9.14	0.434	0.00617	1.25	0.338	-0.0432	0.7	0.424	-0.302	0.847	-0.229	0.0267	0.0338
9.39	0.474	0.00617	1.26	0.355	-0.0556	0.685	0.46	-0.309	0.857	-0.207	0.0273	0.0131
9.7	0.506	0.00617	1.29	0.403	-0.0525	0.721	0.478	-0.31	0.887	-0.212	0.0327	0.013
10.11	0.534	0.00618	1.32	0.404	-0.0509	0.717	0.514	-0.304	0.892	-0.177	0.0194	0.0258
10.45	0.568	0.0123	1.34	0.446	-0.0509	0.724	0.539	-0.309	0.901	-0.179	0.0226	0.0439
10.7	0.599	0.0185	1.36	0.475	-0.0432	0.755	0.568	-0.299	0.917	-0.182	0.0233	0.0339
10.99	0.63	0.0278	1.38	0.494	-0.0417	0.764	0.588	-0.298	0.932	-0.176	0.0246	0.0331
11.3	0.653	0.0201	1.41	0.528	-0.0417	0.774	0.62	-0.299	0.931	-0.181	0.0231	0.0681
11.64	0.682	0.0231	1.42	0.529	-0.0478	0.777	0.647	-0.299	0.96	-0.175	0.0327	0.0714
11.99	0.715	0.0278	1.46	0.54	-0.0448	0.787	0.674	-0.319	0.995	-0.164	0.0289	0.0418
12.33	0.741	0.0355	1.49	0.562	-0.0448	0.816	0.699	-0.316	1.02	-0.158	0.0227	0.0412
12.65	0.772	0.034	1.52	0.571	-0.0417	0.821	0.718	-0.33	1.01	-0.162	0.0267	0.0619
12.96	0.792	0.0324	1.54	0.59	-0.0494	0.829	0.756	-0.332	1.04	-0.151	0.0259	0.0452
13.37	0.824	0.0262	1.56	0.605	-0.0448	0.846	0.772	-0.327	1.08	-0.141	0.0468	0.0388
13.55	0.843	0.0262	1.6	0.62	-0.0463	0.863	0.804	-0.33	1.09	-0.142	0.0236	0.0179
13.96	0.881	0.0293	1.63	0.654	-0.0494	0.879	0.84	-0.332	1.12	-0.122	0.0275	0.0436
14.18	0.911	0.0247	1.67	0.668	-0.0509	0.89	0.852	-0.338	1.14	-0.115	0.0248	0.0613
14.52	0.948	0.0216	1.69	0.701	-0.0463	0.903	0.875	-0.35	1.16	-0.134	0.0232	0.0648
14.9	0.991	0.0108	1.73	0.724	-0.0478	0.915	0.892	-0.346	1.18	-0.118	0.0291	0.0536
15.21	1.02	0.00309	1.75	0.762	-0.0509	0.924	0.924	-0.356	1.19	-0.129	0.0329	0.066
15.59	1.06	-0.00154	1.79	0.793	-0.0525	0.917	0.963	-0.369	1.23	-0.129	0.0391	0.0665
15.87	1.1	0.00926	1.82	0.827	-0.0494	0.943	1	-0.367	1.25	-0.0757	0.0334	0.0519
16.21	1.13	0.0185	1.84	0.867	-0.0386	0.955	1.02	-0.36	1.27	-0.0909	0.0342	0.0455
16.43	1.16	0.0123	1.87	0.88	-0.0417	0.958	1.06	-0.355	1.28	-0.0886	0.0302	0.0689
16.84	1.21	0.0108	1.88	0.924	-0.0417	0.97	1.1	-0.343	1.3	-0.0842	0.0318	0.0899
17.18	1.25	0.0278	1.92	0.96	-0.0247	0.989	1.14	-0.341	1.33	-0.0851	0.0357	0.0627
17.4	1.27	0.0247	1.93	0.985	-0.037	1	1.17	-0.336	1.34	-0.0847	0.0307	0.0697
17.75	1.3	0.0355	1.97	1.01	-0.0401	1.04	1.2	-0.352	1.36	-0.0801	0.0246	0.0631
18.12	1.34	0.0278	2	1.04	-0.0355	1.04	1.24	-0.355	1.38	-0.0803	0.0358	0.082
18.37	1.38	0.0324	2.02	1.06	-0.034	1.05	1.27	-0.364	1.4	-0.0687	0.0397	0.0741
18.72	1.4	0.0355	2.05	1.07	-0.0401	1.07	1.29	-0.372	1.43	-0.0476	0.0304	0.066
19.09	1.43	0.0386	2.08	1.09	-0.037	1.07	1.33	-0.377	1.46	-0.0341	0.036	0.0929
19.31	1.47	0.0417	2.11	1.09	-0.0401	1.1	1.36	-0.381	1.49	-0.0389	0.0352	0.0763
19.78	1.5	0.0355	2.16	1.13	-0.0278	1.11	1.38	-0.372	1.52	-0.0388	0.0346	0.0638
20.09	1.52	0.0355	2.2	1.14	-0.0324	1.13	1.41	-0.378	1.55	-0.069	0.0283	0.0721
20.31	1.56	0.0339	2.24	1.17	-0.0309	1.14	1.45	-0.395	1.58	-0.032	0.0307	0.0638
20.69	1.59	0.0247	2.27	1.2	-0.037	1.15	1.48	-0.387	1.61	-0.0275	0.0418	0.0862
21.03	1.63	0.0201	2.29	1.23	-0.0355	1.18	1.51	-0.39	1.63	-0.0452	0.0371	0.0942
21.38	1.67	0.0216	2.33	1.26	-0.0386	1.19	1.53	-0.389	1.65	-0.03	0.0413	0.0815
21.66	1.71	0.0123	2.37	1.29	-0.0417	1.18	1.57	-0.415	1.68	-0.00573	0.0451	0.0923
21.97	1.74	0.0108	2.4	1.33	-0.0355	1.2	1.61	-0.406	1.72	-0.0135	0.0481	0.0943
22.25	1.8	0.0201	2.42	1.38	-0.0309	1.21	1.64	-0.417	1.75	-0.0138	0.0379	0.0796
22.6	1.83	0.0231	2.45	1.41	-0.0386	1.23	1.68	-0.404	1.75	-0.00525	0.0433	0.0701
22.94	1.88	0.0201	2.49	1.44	-0.034	1.24	1.72	-0.403	1.78	0.00169	0.0393	0.0888
23.26	1.92	0.0216	2.52	1.48	-0.0278	1.25	1.76	-0.394	1.81	0.0119	0.0287	0.119
23.57	1.95	0.0232	2.54	1.53	-0.0386	1.28	1.81	-0.404	1.84	0.00157	0.0419	0.107
23.85	1.99	0.0309	2.56	1.56	-0.0278	1.28	1.84	-0.409	1.86	0.00941	0.0431	0.116
24.26	2.03	0.0339	2.61	1.58	-0.0262	1.3	1.88	-0.407	1.89	0.0213	0.0278	0.0952
24.54	2.08	0.0293	2.63	1.61	-0.0401	1.33	1.92	-0.411	1.93	0.0189	0.0391	0.126
24.85	2.1	0.0386	2.65	1.63	-0.0324	1.34	1.96	-0.421	1.96	0.0422	0.0384	0.135
25.2	2.14	0.0386	2.69	1.64	-0.0262	1.35	2	-0.427	1.98	0.0218	0.0445	0.107
25.48	2.18	0.0494	2.72	1.67	-0.0216	1.39	2.04	-0.427	2.02	0.0454	0.0439	0.128
25.85	2.2	0.0417	2.76	1.69	-0.0339	1.39	2.07	-0.432	2.04	0.0293	0.0461	0.116
26.23	2.24	0.0386	2.79	1.71	-0.0324	1.42	2.1	-0.431	2.06	0.0548	0.0423	0.104
26.48	2.28	0.0355	2.83	1.72	-0.034	1.43	2.14	-0.437	2.09	0.0519	0.0406	0.0893
26.76	2.31	0.0324	2.87	1.77	-0.0324	1.45	2.17	-0.446	2.11	0.0697	0.0321	0.11
27.11	2.35	0.037	2.9	1.79	-0.0278	1.46	2.22	-0.44	2.15	0.0815	0.0432	0.11
27.48	2.4	0.0232	2.93	1.83	-0.0386	1.49	2.25	-0.44	2.19	0.0603	0.0355	0.133
27.76	2.44	0.0247	2.98	1.86	-0.037	1.49	2.28	-0.435	2.22	0.0692	0.0397	0.122
28.11	2.48	0.0247	3.02	1.9	-0.034	1.51	2.32	-0.44	2.27	0.0754	0.0512	0.128
28.39	2.53	0.0185	3.05	1.94	-0.0401	1.53	2.36	-0.457	2.31	0.067	0.0466	0.123
28.77	2.58	0.0247	3.09	1.99	-0.0324	1.53	2.4	-0.446	2.33	0.0842	0.0456	0.111
29.08	2.61	0.0293	3.13	2.04	-0.0309	1.55	2.45	-0.454	2.36	0.0823	0.0479	0.112
29.45	2.66	0.0309	3.15	2.07	-0.0262	1.55	2.48	-0.454	2.4	0.121	0.0486	0.132
29.67	2.7	0.0309	3.18	2.13	-0.0278	1.57	2.52	-0.441	2.41	0.113	0.0364	0.127
30.05	2.75	0.037	3.22	2.15	-0.0309	1.58	2.57	-0.449	2.43	0.113	0.0388	0.126
30.36	2.79	0.0355	3.25	2.19	-0.0185	1.61	2.61	-0.451	2.45	0.0956	0.0447	0.135
30.64	2.83	0.0463	3.28	2.23	-0.0262	1.61	2.67	-0.448	2.47	0.115	0.0479	0.121
30.99	2.87	0.0463	3.32	2.25	-0.0232	1.64	2.7	-0.446	2.5	0.118	0.0498	0.155
31.24	2.91	0.0432	3.34	2.27	-0.0262	1.65	2.74	-0.454	2.53	0.129	0.0476	0.14
31.68	2.95	0.0494	3.37	2.31	-0.0247	1.68	2.79	-0.463	2.58	0.139	0.0506	0.135
31.93	2.98	0.0525	3.42	2.32	-0.0201	1.71	2.83	-0.472	2.63	0.151	0.0546	0.156
32.3	3.02	0.0448	3.45	2.34	-0.0201	1.71	2.88	-0.46	2.66	0.154	0.0491	0.144
32.65	3.05	0.0478	3.49	2.36	-0.0201	1.75	2.92	-0.469	2.69	0.147	0.0454	0.139
32.93	3.1	0.0525	3.52	2.38	-0.0262	1.77	2.96	-0.471	2.73	0.151	0.0438	0.131
33.24	3.14	0.0478	3.56	2.42	-0.0216	1.79	2.99	-0.472	2.76	0.161	0.0476	0.151
33.52	3.17	0.0386	3.61	2.45	-0.0401	1.79	3.03	-0.492	2.8	0.173	0.0417	0.162
33.93	3.21	0.037	3.66	2.49	-0.0262	1.81	3.08	-0.485	2.82	0.158	0.0463	0.164
34.18	3.26	0.0293	3.68	2.53	-0.0232	1.83	3.11	-0.489	2.85	0.177	0.0552	0.147
34.52	3.31	0.0293	3.72	2.57	-0.0309	1.83	3.16	-0.5	2.87	0.181	0.0497	0.158
34.9	3.35	0.0339	3.76	2.63	-0.0232	1.87	3.21	-0.488	2.94	0.17	0.0482	0.144
35.15	3.41	0.0262	3.79	2.67	-0.0278	1.86	3.24	-0.491	2.98	0.179	0.0564	0.148
35.49	3.44	0.0278	3.84	2.73	-0.017	1.89	3.28	-0.486	3	0.175	0.048	0.149
35.78	3.49	0.0355	3.87	2.77	-0.0231	1.9	3.34	-0.482	3.04	0.193	0.064	0.157
36.09	3.53	0.0324	3.91	2.81	-0.0154	1.91	3.39	-0.474	3.06	0.206	0.0517	0.165
36.5	3.58	0.0401	3.94	2.85	-0.0216	1.93	3.43	-0.469	3.1	0.201	0.0449	0.155
36.72	3.62	0.037	3.98	2.9	-0.0185	1.95	3.48	-0.472	3.13	0.199	0.0523	0.186
37.06	3.67	0.0448	4	2.94	-0.0139	1.99	3.52	-0.468	3.16	0.21	0.057	0.167
37.44	3.71	0.0494	4.04	2.96	-0.0108	2.01	3.58	-0.461	3.18	0.212	0.0605	0.18
37.69	3.76	0.0509	4.09	3.01	-0.0154	2.03	3.61	-0.478	3.21	0.221	0.0614	0.172
38.09	3.79	0.054	4.11	3.02	-0.017	2.07	3.67	-0.471	3.26	0.188	0.0552	0.172
38.41	3.83	0.0494	4.15	3.04	-0.0154	2.09	3.72	-0.488	3.3	0.25	0.0546	0.194
38.66	3.88	0.054	4.18	3.07	-0.00618	2.1	3.76	-0.478	3.34	0.239	0.0584	0.188
39.06	3.9	0.054	4.24	3.09	-0.0139	2.13	3.8	-0.483	3.37	0.251	0.0624	0.179
39.38	3.94	0.0571	4.27	3.13	-0.0201	2.15	3.84	-0.495	3.41	0.248	0.0516	0.169
39.69	3.99	0.0478	4.31	3.15	-0.00618	2.17	3.88	-0.498	3.45	0.26	0.0523	0.189
40	4.04	0.0401	4.36	3.17	-0.0185	2.18	3.93	-0.497	3.49	0.28	0.0588	0.193
40.31	4.09	0.0494	4.41	3.23	-0.0154	2.21	3.97	-0.502	3.54	0.26	0.0464	0.203
40.69	4.13	0.0309	4.45	3.27	-0.0123	2.23	4	-0.502	3.59	0.256	0.0538	0.199
41	4.17	0.0293	4.48	3.33	-0.0154	2.24	4.06	-0.503	3.61	0.267	0.0637	0.19
41.29	4.23	0.0262	4.53	3.38	-0.0154	2.26	4.09	-0.509	3.65	0.253	0.056	0.194
41.6	4.28	0.0309	4.56	3.43	-0.0123	2.28	4.16	-0.506	3.7	0.302	0.0658	0.178
41.88	4.32	0.0324	4.59	3.46	-0.0123	2.29	4.2	-0.502	3.72	0.292	0.0588	0.185
42.22	4.37	0.0355	4.64	3.52	-0.00772	2.3	4.25	-0.494	3.76	0.301	0.0609	0.193
42.63	4.43	0.0417	4.68	3.57	-0.00309	2.31	4.31	-0.494	3.8	0.311	0.0533	0.237
42.88	4.47	0.0602	4.7	3.62	-0.00925	2.34	4.36	-0.488	3.82	0.317	0.0602	0.194
43.19	4.52	0.0617	4.75	3.67	-0.00154	2.38	4.39	-0.483	3.87	0.31	0.0553	0.2
43.57	4.56	0.0463	4.78	3.7	0.00309	2.39	4.44	-0.482	3.9	0.312	0.057	0.21
43.79	4.61	0.0648	4.82	3.75	0.00463	2.42	4.48	-0.471	3.94	0.319	0.0635	0.206
44.16	4.65	0.0664	4.84	3.77	0.00308	2.43	4.53	-0.478	3.96	0.335	0.0582	0.211
44.54	4.69	0.054	4.9	3.78	-0.00308	2.46	4.59	-0.486	4.01	0.346	0.0659	0.207
44.88	4.73	0.0633	4.94	3.83	-0.00154	2.49	4.65	-0.472	4.04	0.342	0.0607	0.236
45.17	4.77	0.0664	5	3.86	-0.00309	2.5	4.7	-0.475	4.08	0.354	0.0631	0.221
45.42	4.81	0.0648	5.03	3.88	-0.00463	2.55	4.75	-0.465	4.13	0.35	0.0686	0.216
45.79	4.86	0.0571	5.08	3.92	-1.14e-06	2.57	4.8	-0.471	4.16	0.336	0.0516	0.186
46.11	4.89	0.0509	5.12	3.96	0.00154	2.6	4.84	-0.471	4.21	0.356	0.0647	0.224
46.45	4.95	0.0509	5.17	3.99	-0.00308	2.59	4.87	-0.474	4.25	0.382	0.065	0.236
46.79	5	0.054	5.2	4.03	-0.00308	2.64	4.92	-0.475	4.29	0.361	0.0619	0.241
47.17	5.05	0.037	5.25	4.08	0.00154	2.65	4.97	-0.483	4.33	0.38	0.0738	0.226
47.42	5.1	0.037	5.3	4.12	0.00154	2.67	5.01	-0.489	4.39	0.37	0.0713	0.211
47.76	5.15	0.0401	5.33	4.18	0.00154	2.68	5.08	-0.475	4.44	0.381	0.0728	0.242
48.05	5.2	0.037	5.39	4.23	-0.00308	2.69	5.14	-0.488	4.47	0.396	0.0718	0.229
48.39	5.26	0.0417	5.44	4.28	-0.00308	2.71	5.18	-0.471	4.51	0.406	0.0633	0.225
48.67	5.29	0.0494	5.47	4.33	0.00617	2.74	5.23	-0.465	4.52	0.419	0.0624	0.253
49.02	5.36	0.0463	5.51	4.4	0.00309	2.76	5.29	-0.448	4.59	0.413	0.0549	0.246
49.27	5.41	0.054	5.54	4.43	0.0123	2.78	5.35	-0.448	4.61	0.41	0.065	0.24
49.64	5.46	0.0571	5.58	4.48	0.0201	2.8	5.38	-0.434	4.66	0.417	0.0648	0.277
49.96	5.51	0.0586	5.61	4.51	0.0108	2.81	5.44	-0.427	4.7	0.439	0.0664	0.235
50.24	5.56	0.0556	5.66	4.55	0.017	2.86	5.47	-0.409	4.74	0.433	0.073	0.244
50.61	5.6	0.0633	5.69	4.59	0.0108	2.87	5.53	-0.411	4.77	0.414	0.0615	0.264
50.93	5.64	0.071	5.73	4.63	0.0154	2.91	5.58	-0.397	4.81	0.452	0.0738	0.252
51.3	5.7	0.0679	5.78	4.65	0.0139	2.94	5.63	-0.403	4.85	0.425	0.0731	0.285
51.58	5.74	0.0617	5.82	4.67	0.00618	2.96	5.71	-0.395	4.9	0.467	0.0784	0.25
51.9	5.77	0.0679	5.86	4.7	0.0123	3	5.73	-0.378	4.95	0.477	0.0793	0.255
52.27	5.82	0.0602	5.9	4.74	0.0123	3.03	5.79	-0.381	4.99	0.454	0.0684	0.253
52.52	5.86	0.0586	5.97	4.76	0.0108	3.06	5.84	-0.369	5.03	0.48	0.0753	0.268
52.93	5.91	0.0494	6	4.81	0.0123	3.08	5.87	-0.37	5.06	0.506	0.0663	0.257
53.21	5.96	0.0448	6.05	4.85	0.0139	3.11	5.93	-0.369	5.14	0.479	0.0709	0.283
53.49	6.02	0.0525	6.11	4.9	0.0185	3.12	5.97	-0.372	5.18	0.488	0.0798	0.272
53.84	6.06	0.0494	6.14	4.96	0.00464	3.15	6.03	-0.367	5.22	0.483	0.0728	0.279
54.18	6.11	0.0417	6.2	5.02	0.0154	3.17	6.1	-0.375	5.27	0.476	0.0759	0.276
54.53	6.17	0.0448	6.24	5.09	0.017	3.19	6.15	-0.358	5.3	0.542	0.075	0.267
54.78	6.24	0.0494	6.29	5.13	0.0123	3.21	6.2	-0.355	5.35	0.544	0.0805	0.267
55.15	6.28	0.0494	6.33	5.18	0.0154	3.23	6.25	-0.341	5.39	0.524	0.078	0.285
55.5	6.33	0.054	6.36	5.24	0.0262	3.24	6.32	-0.324	5.44	0.539	0.0812	0.312
55.81	6.38	0.0617	6.4	5.3	0.0154	3.27	6.37	-0.319	5.48	0.537	0.0682	0.301
56.12	6.43	0.0617	6.44	5.34	0.0293	3.3	6.42	-0.295	5.51	0.542	0.0695	0.292
56.43	6.5	0.0694	6.48	5.4	0.0293	3.33	6.48	-0.273	5.57	0.549	0.0727	0.296
56.78	6.53	0.0617	6.53	5.43	0.0293	3.35	6.53	-0.255	5.6	0.564	0.0715	0.301
57.09	6.59	0.0664	6.57	5.48	0.0232	3.38	6.59	-0.244	5.62	0.564	0.0801	0.3
57.4	6.62	0.0664	6.61	5.49	0.0355	3.41	6.63	-0.23	5.67	0.582	0.0769	0.308
57.72	6.67	0.0741	6.66	5.54	0.0278	3.43	6.71	-0.224	5.72	0.591	0.0778	0.323
58.03	6.72	0.0725	6.7	5.57	0.0247	3.46	6.76	-0.21	5.76	0.585	0.0723	0.318
58.31	6.77	0.071	6.75	5.59	0.0293	3.5	6.79	-0.196	5.82	0.598	0.0778	0.304
58.69	6.81	0.0725	6.79	5.63	0.0278	3.52	6.86	-0.174	5.87	0.603	0.073	0.293
59	6.87	0.0725	6.84	5.66	0.0247	3.54	6.91	-0.174	5.92	0.603	0.0815	0.322
59.35	6.9	0.0571	6.87	5.7	0.0278	3.57	6.95	-0.159	5.95	0.619	0.0755	0.323
59.72	6.96	0.0525	6.95	5.75	0.0262	3.61	6.98	-0.159	6.01	0.596	0.0801	0.328
60	7.03	0.0494	6.99	5.81	0.0324	3.64	7.06	-0.159	6.08	0.615	0.0751	0.328
60.25	7.07	0.0463	7.03	5.86	0.0355	3.64	7.11	-0.15	6.12	0.621	0.0773	0.334
60.66	7.13	0.0509	7.09	5.93	0.0309	3.67	7.15	-0.142	6.19	0.621	0.0943	0.339
60.94	7.18	0.054	7.14	6	0.0386	3.67	7.2	-0.128	6.22	0.644	0.0733	0.315
61.29	7.24	0.0602	7.17	6.05	0.0232	3.69	7.27	-0.125	6.29	0.649	0.0788	0.321
61.57	7.29	0.0556	7.22	6.11	0.0432	3.73	7.33	-0.0972	6.32	0.672	0.0842	0.338
61.82	7.34	0.0509	7.27	6.16	0.037	3.75	7.38	-0.0756	6.34	0.664	0.0797	0.355
62.23	7.4	0.0679	7.3	6.22	0.0463	3.78	7.44	-0.0571	6.38	0.677	0.0728	0.321
62.54	7.46	0.0679	7.33	6.27	0.0494	3.8	7.49	-0.0309	6.44	0.674	0.0803	0.33
62.82	7.5	0.0772	7.37	6.31	0.0417	3.83	7.55	-0.00772	6.48	0.687	0.0743	0.334
63.2	7.56	0.0679	7.42	6.36	0.054	3.87	7.61	0.0154	6.5	0.694	0.0886	0.343
63.48	7.6	0.0833	7.47	6.4	0.0509	3.9	7.66	0.0448	6.53	0.706	0.0878	0.352
63.76	7.66	0.0741	7.51	6.43	0.0617	3.94	7.72	0.0602	6.62	0.711	0.0831	0.347
64.17	7.7	0.0787	7.56	6.47	0.0478	3.96	7.78	0.0849	6.65	0.736	0.0763	0.382
64.51	7.75	0.0849	7.61	6.48	0.0556	3.99	7.85	0.106	6.71	0.728	0.0831	0.362
64.79	7.79	0.0833	7.65	6.53	0.0494	4.04	7.9	0.128	6.76	0.732	0.0778	0.366
65.14	7.84	0.0802	7.72	6.57	0.0478	4.07	7.96	0.134	6.81	0.731	0.0808	0.35
65.42	7.89	0.0725	7.76	6.61	0.0556	4.1	8	0.144	6.83	0.743	0.0784	0.368
65.67	7.94	0.0725	7.81	6.66	0.0617	4.11	8.05	0.165	6.85	0.754	0.091	0.372
66.11	7.99	0.0679	7.87	6.72	0.0556	4.16	8.1	0.173	6.92	0.75	0.0801	0.381
66.45	8.04	0.0571	7.9	6.76	0.0494	4.16	8.16	0.19	6.97	0.763	0.0843	0.37
66.73	8.09	0.0586	7.96	6.81	0.054	4.2	8.22	0.194	7	0.758	0.0835	0.381
67.01	8.16	0.0525	8.01	6.88	0.0525	4.21	8.28	0.205	7.07	0.768	0.085	0.386
67.33	8.22	0.0494	8.05	6.94	0.0525	4.23	8.34	0.222	7.13	0.772	0.0872	0.368
67.7	8.28	0.0664	8.11	7	0.0617	4.27	8.38	0.236	7.17	0.781	0.0773	0.37
68.02	8.33	0.0617	8.14	7.07	0.0571	4.28	8.47	0.272	7.22	0.825	0.0949	0.392
68.36	8.38	0.0664	8.18	7.12	0.0664	4.3	8.52	0.295	7.29	0.814	0.0812	0.391
68.7	8.43	0.0741	8.23	7.19	0.0633	4.33	8.57	0.327	7.33	0.811	0.0744	0.388
68.95	8.49	0.0802	8.27	7.25	0.0725	4.36	8.63	0.353	7.36	0.821	0.0865	0.421
69.36	8.54	0.0818	8.32	7.29	0.0741	4.4	8.69	0.39	7.43	0.836	0.0866	0.397
69.67	8.6	0.0833	8.35	7.34	0.0802	4.44	8.74	0.412	7.46	0.847	0.0947	0.44
69.92	8.65	0.0818	8.4	7.36	0.0772	4.45	8.81	0.449	7.5	0.845	0.0863	0.404
70.3	8.7	0.0864	8.45	7.4	0.0818	4.49	8.86	0.491	7.57	0.859	0.0862	0.408
70.64	8.75	0.0864	8.51	7.44	0.0772	4.52	8.92	0.509	7.62	0.872	0.0902	0.429
70.83	8.8	0.0833	8.55	7.47	0.091	4.57	8.98	0.542	7.64	0.874	0.0985	0.41
71.21	8.84	0.0818	8.6	7.49	0.0818	4.61	9.03	0.568	7.7	0.893	0.0931	0.406
71.52	8.9	0.0818	8.64	7.53	0.0849	4.66	9.09	0.588	7.75	0.876	0.0791	0.407
71.93	8.94	0.0787	8.71	7.57	0.0864	4.69	9.15	0.617	7.78	0.887	0.0861	0.444
72.18	8.99	0.0802	8.76	7.62	0.0756	4.71	9.18	0.62	7.83	0.921	0.0894	0.405
72.49	9.05	0.0756	8.82	7.69	0.088	4.73	9.22	0.644	7.89	0.902	0.0924	0.456
72.8	9.11	0.0772	8.86	7.74	0.0833	4.75	9.29	0.654	7.92	0.904	0.092	0.416
73.12	9.14	0.0664	8.93	7.8	0.0741	4.79	9.35	0.682	8.02	0.916	0.0927	0.433
73.52	9.2	0.0633	8.97	7.86	0.0802	4.8	9.43	0.691	8.05	0.902	0.0882	0.423
73.74	9.28	0.0648	9.04	7.94	0.0787	4.81	9.47	0.713	8.11	0.934	0.0935	0.436
74.12	9.34	0.071	9.07	7.99	0.0957	4.86	9.51	0.745	8.13	0.955	0.0897	0.431
74.49	9.39	0.0725	9.13	8.07	0.0895	4.87	9.59	0.776	8.19	0.948	0.0966	0.434
74.78	9.45	0.0833	9.17	8.12	0.1	4.88	9.65	0.806	8.25	0.98	0.0951	0.45
75.12	9.51	0.0787	9.2	8.19	0.0988	4.93	9.7	0.835	8.29	0.997	0.0929	0.431
75.34	9.57	0.0833	9.26	8.25	0.106	4.96	9.77	0.877	8.33	0.987	0.0972	0.442
75.78	9.61	0.0895	9.3	8.29	0.0988	5	9.81	0.912	8.4	1.01	0.0819	0.485
76	9.69	0.0911	9.34	8.35	0.108	5.04	9.86	0.957	8.43	0.994	0.104	0.481
76.4	9.72	0.103	9.39	8.37	0.108	5.05	9.93	0.989	8.49	1.02	0.0985	0.462
76.69	9.77	0.0957	9.43	8.41	0.103	5.12	9.98	1.03	8.55	1.02	0.0954	0.476
77.09	9.81	0.0911	9.48	8.46	0.114	5.18	10.1	1.07	8.62	1.03	0.0978	0.503
77.31	9.87	0.0911	9.54	8.49	0.113	5.19	10.1	1.1	8.65	1.04	0.0939	0.48
77.62	9.92	0.0911	9.59	8.52	0.113	5.23	10.2	1.14	8.72	1.05	0.0994	0.484
78.03	9.97	0.088	9.63	8.55	0.12	5.27	10.2	1.17	8.79	1.06	0.101	0.48
78.28	10	0.0849	9.69	8.61	0.113	5.31	10.3	1.19	8.86	1.07	0.103	0.485
78.63	10.1	0.0849	9.74	8.65	0.116	5.33	10.3	1.21	8.89	1.09	0.094	0.5
78.97	10.1	0.0756	9.81	8.71	0.116	5.34	10.4	1.23	8.91	1.06	0.102	0.504
79.35	10.2	0.0756	9.85	8.77	0.125	5.38	10.5	1.26	8.98	1.07	0.0967	0.488
79.63	10.2	0.0787	9.91	8.83	0.113	5.39	10.5	1.27	9.02	1.09	0.101	0.517
79.97	10.3	0.0695	9.96	8.91	0.116	5.45	10.6	1.3	9.07	1.11	0.104	0.53
80.29	10.4	0.0725	10	8.95	0.127	5.46	10.6	1.31	9.1	1.12	0.104	0.481

## Sheet: Fig. 7E
Values are reversal potentials (in mV) with extracellular NaCl and intracellular NMDG-Cl for indicated hTMEM206 mutants, transfected into TMEM206 KO cells at pH5. Each replicate represents a single cell.
WT	L84C	L84D	R87C	W304C	W304E	W304R	I307C	I307W	G312D	L315D	A316C	A316D
2.1	1.14	2.03	0.75	-3.02	-2.13	1.36	1.07	1.84	2.03	22.16	3.7	1.46
3.06	3.25	2.03	0.62	1.9	1.26	1.26	1.9	2.61	3.18	23.09	2.74	2.8
3.63	2.29	4.14	0.62	3.06	1.71	1.39	2.35	2.22	2.54	23.66	2.54	4.72
1.97	1.26	3.44	1.26	1.97	1.52	1.46	3.12	2.35	2.35	28.08	2.86	9.58
0.11	1.46	2.29	0.5	-0.91	1.58	1.84	1.84	2.48	3.06	24.43	1.71	-3.28
1.97		0.3		-2.26	1.84	1.14	1.65		0.37
1.39					0.82
3.57
4.21

## Sheet: Fig. 7F
Values are reversal potentials (in mV) with extracellular NaI and intracellular NMDG-Cl for indicated hTMEM206 mutants, transfected into TMEM206 KO cells at pH5. Each replicate represents a single cell.
WT	L84C	L84D	R87C	W304C	W304E	W304R	I307C	I307W	G312D	L315D	A316C	A316D
-13.42	-16.2	-14.34	-18.5	-15.11	-14.85	-9.96	NA	-15.68	-14.47	-22.69	-12.55	-11.84
-15.3	-22.21	-11.2	-19.46	-19.2	-14.47	-11.14		-18.88	-14.85	-23.75	-17.16	-9.35
-11.25	-24.52	-11.33	-19.33	-16.07	-12.93	-11.2		-16.52	-15.81	-19.2	-17.03	-6.66
-11.08	-16.77	-13.19	-14.72	-13	-13.83	-14.15		-16.52	-18.76	-21.25	-12.93	-8.52
-9.25	-18.5	-10.95	-13.51	-21.12	-16.09	-11.2		-19.72	-19.91	-22.85	-17.73	-9.67
-16.39						-14.15
-13.81
-13.64
-13.29

## Sheet: Fig. 7G
Values are reversal potentials (in mV) with extracellular Na2SO4 and intracellular NMDG-Cl for indicated hTMEM206 mutants, transfected into TMEM206 KO cells at pH5. Each replicate represents a single cell.
WT	L84C	L84D	R87C	W304C	W304E	W304R	I307C	I307W	G312D	L315D	A316C	A316D
	52.28	64.14	67.64		59.7	41.67		63.8	69.69			54.26
	37.56	67.64	76.34		53.75	44.09		62.26	64.5			69.5
	55.16	55.8	80.76		44.73	47.16		63.93	63.42			55.8
	59.77	66.17	88.5		57.91	41.4		60.34	64.63			53.94
		64.38	87.42		52.22	49.27		61.56	61.11			71.54
		67			36.34	54.78			54.07

## Sheet: Fig. 7H
Values are current densities (in pA/pF) with extracellular Na2SO4 and intracellular NMDG-Cl for indicated hTMEM206 mutants, transfected into TMEM206 KO cells at pH5. Each replicate represents a single cell.
WT	L84C	L84D	R87C	W304C	W304E	W304R	I307C	I307W	G312D	L315D	A316C	A316D
16.32	43.81	91.99	39.315	5.689	100.8	132.7	6.501	83.259	46.73	6.761	10.88	6.266
6.6793	20.942	34.56	15.547	8.0823	182.45	34.85	9.446	23.41	34.01	3.803	4.783	12.24
5.1097	19.35	71.31	13.52	11.14	31.56	50.29	9.885	142.5	45.501	0.454	11.88	70.91
8.261	31.549	42.05	1.026	15.955	65.58	19.202	10.44	94.553	26.05	0.6	6.926	8.67
7.696	42.16	56.06	6.403	9.2973	85.48	48.59	5.915	109	22.6	0.033	7.1986	14.22
4.708					90.014	49.8	15.25	201.74	27.06	0.1
12.1					20.31		15.71
