# Supplementary material for: Identification of TMEM206 proteins as pore of PAORAC/ASOR acid-sensitive chloride channels
Source: eLife. 2019 Jul 18;8:e49187. doi: 10.7554/eLife.49187 (PMC6663466; doi:10.7554/eLife.49187)
Supplement: Figure 8—source data 1. [file elife-49187-fig8-data1.xlsx]

## Sheet: Fig. 8B
Percentage of Hoechst(+) cells that were also PI(+). Replicates represent counts from individual microscopic fields.
pH7.4			pH7.4 + PS			pH4.5			pH4.5 + PS
WT	KO g3	KO g2	WT	KO g3	KO g2	WT	KO g3	KO g2	WT	KO g3	KO g2
0	0.613497	0	0	0.14771	0.57971	23.4483	0.283019	0.290276	3.92157	0.422386	0.374813
0.196721	0.522876	0	0.121212	0	0.571429	21.1359	0.824402	0.157604	14.1509	0.242424	0.332779
0.149701	0.246914	0	0.205903	0.284495	0.60241	19.116	0.209205	0.815395	0.381679	0	0.329761
0.181818	0.484848	0.438169	0.168067	0	0	2.93272	0.519751	0.289017	0.810811	0.369004	0.813008
0.263505	0	0.04207	0.069832	0	0.358423	25.4902	0	0.631912	0.361664	0.589623	0.141143
0	0	0.289615	0	0	0	22.6302	0.164745	0.247525	0.626566	0.477327	0.235294
0.19516	0.387597	0.538302	0	0.524476	0.441989	10.2685	10.1093	2.90046	12.6564	10.6654	6.99058
0	0.712378	0.041237	2.58398	0.42328	0.152905	7.54537	9.73025	4.9505	4.44297	1.13177	0.454545
0.457875	0.071685	1.1169	0	0.087184	0.234632	8.61953	15.587	3.78058	1.8227	1.05882	3.75
0.065703	0.885609	0	0.18315	0	0.705329	13.9167	8.51293	4.50738	4.92333	1.87166	7.27081
0.636943	0.555247	0	0.355872	0.752445	0.928218	13.9824	3.79877	1.75524	5.34247	12.4178	4.35239
0.423131	0.187003	0.102669	0.558659	0.164609	0.369004	12.1281	5.48847	1.98925	7.24638	7.95892	7.94224
0.515907	0.05814	0.026961	0.209059	0.067797	0.039479	4.56853	0.983405	1.34633	0.903274	1.05263	0.371747
0.270124	0	0	0.162338	0.302216	0	2.21894	1.29102	0.736799	0.984103	1.62162	0.634921
0.258017	0	0	0.516432	0.185529	0.039078	16.596	0.784827	0.674974	0.494604	0.202634	0.687443
0.146972	0.048077		0.975403	0.074156	0	3.45592	1.21766	0.413052	1.96421	0.151515	1.20284
0.098912	0		0	0.313725	0	6.08407	0.75067	0.909727	1.75824	0.279955	0.730282
0.662589	0			0.072254	0	10.5854	0.449326	1.35379	0.653061	0.892857	1.88356

## Sheet: Fig. 8C
Data are values for cell volume (calcein fluorescence) from individual 96-wells, normalized to the first value in each dataset (= 1)
time [s]	WT pH 4.2																								TMEM206-/- pH 4.2																								WT pH 7.4
0	1	1	1	1	1	1	1	1	1	1	1	1	1	1	1	1	1	1	1	1	1	1	1	1	1	1	1	1	1	1	1	1	1	1	1	1	1	1	1	1	1	1	1	1	1	1	1	1	1
10	1.02609	1.00753	1.006	1.0009	1.00591	1.00478	1.00444	1.01018	1.0055	1.02416	1.00083	1.01644	1.00792	1.00476	1.01353	1.00271	1.0007	1.01104	1.01543	1.01534	1.03337	1.01302	1.01946	1.01296	1.0279	1.01141	1.0038	1.00103	0.968529	1.00927	1.00936	1.04305	1.01903	1.00674	0.997536	1.01114	1.034	1.00917	1.03995	1.00205	1.02357	1.00463	1.00983	1.00768	1.0003	0.998361	1.00832	1.00551	1.00317
21	1.03252	1.01345	1.01373	1.00789	1.0095	1.00584	1.00737	1.00792	1.01399	1.04016	1.00826	1.02676	1.01601	1.01	1.02009	1.00844	1.00959	1.02492	1.02637	1.0258	1.04413	1.0309	1.03065	1.02666	1.02919	1.01971	1.00837	1.00811	0.967971	1.01125	1.01236	1.05273	1.02124	1.01235	1.00219	1.01624	1.04409	1.01792	1.0481	1.01019	1.0348	1.0152	1.01427	1.01391	1.01497	0.990792	1.01661	1.01478	0.994401
31	1.04118	1.01113	1.01207	1.01628	1.01215	1.01147	1.01231	1.0124	1.02045	1.04165	1.01216	1.03231	1.01994	1.01616	1.02522	1.01387	1.01685	1.03498	1.03604	1.02797	1.05622	1.03926	1.04149	1.03517	1.02996	1.0189	1.00673	1.01352	0.972769	1.01588	1.01348	1.06045	1.02053	1.01617	1.00161	1.01948	1.04499	1.02337	1.04562	1.01253	1.03688	1.02003	1.01953	1.01768	1.0183	0.991768	1.02425	1.01973	0.991232
41	1.05162	1.01825	1.02054	1.02843	1.01777	1.01587	1.01434	1.01799	1.02676	1.04417	1.01915	1.04251	1.02366	1.01882	1.03253	1.02124	1.0267	1.04492	1.04605	1.03906	1.06461	1.05259	1.04478	1.04533	1.03967	1.02596	1.01219	1.01673	0.980057	1.01964	1.0166	1.05995	1.02463	1.02092	1.00952	1.02317	1.04554	1.02434	1.04429	1.01581	1.04274	1.02325	1.02358	1.02309	1.02224	1.00049	1.02377	1.02921	0.989082
52	1.0586	1.02318	1.02488	1.03106	1.02236	1.02153	1.01722	1.02301	1.02888	1.04153	1.02256	1.04658	1.02576	1.02459	1.03619	1.02304	1.03218	1.05175	1.05277	1.04449	1.06926	1.05768	1.05546	1.05147	1.04386	1.02833	1.01605	1.01778	0.981787	1.01766	1.01321	1.063	1.02726	1.02155	1.00791	1.02441	1.04934	1.03149	1.04842	1.01818	1.04682	1.03051	1.0298	1.02373	1.02513	1.00119	1.03209	1.03829	0.991456
62	1.05615	1.02215	1.03263	1.0368	1.0254	1.02581	1.02146	1.02714	1.03446	1.04468	1.03425	1.05663	1.03036	1.03151	1.04267	1.0288	1.03697	1.05622	1.06045	1.05354	1.07317	1.0637	1.06212	1.06014	1.04634	1.02961	1.02291	1.01823	0.979231	1.02064	1.02256	1.06205	1.0332	1.024	1.01463	1.03081	1.05123	1.03583	1.04461	1.02641	1.04749	1.02953	1.03191	1.03055	1.02604	1.01228	1.03902	1.04232	0.984502
72	1.05731	1.02053	1.03602	1.03944	1.02867	1.02859	1.03453	1.03131	1.03561	1.05047	1.03678	1.05822	1.02971	1.03654	1.0469	1.03739	1.04101	1.0617	1.06495	1.05234	1.07437	1.07332	1.06753	1.06382	1.04565	1.03253	1.02418	1.01907	0.98557	1.01894	1.02806	1.06397	1.03619	1.03054	1.01743	1.02827	1.0536	1.0354	1.04759	1.02586	1.05209	1.03668	1.03671	1.03057	1.03006	1.02153	1.04299	1.04494	0.983483
83	1.05966	1.03262	1.04081	1.03988	1.03668	1.03235	1.03826	1.03405	1.03629	1.05546	1.04315	1.06456	1.03433	1.04193	1.0495	1.04322	1.04541	1.06577	1.07059	1.05842	1.07593	1.07013	1.06921	1.0628	1.04536	1.0362	1.0256	1.01833	0.98634	1.02583	1.02791	1.06683	1.03995	1.03451	1.02404	1.03987	1.05851	1.04071	1.04329	1.03568	1.05285	1.03691	1.04354	1.03719	1.03219	1.0232	1.04743	1.04489	0.983069
93	1.06354	1.04177	1.04155	1.03955	1.03473	1.03351	1.04423	1.03448	1.03722	1.05514	1.04707	1.07049	1.0358	1.04597	1.05151	1.04612	1.04776	1.07129	1.06974	1.05999	1.08137	1.07623	1.0713	1.06875	1.04677	1.04095	1.02651	1.01933	0.987277	1.0281	1.03338	1.06636	1.04725	1.0353	1.02155	1.0433	1.06261	1.04786	1.04618	1.04277	1.05731	1.04281	1.04208	1.03654	1.03469	1.03081	1.04682	1.05237	0.983192
103	1.06418	1.04452	1.04221	1.04304	1.03418	1.0355	1.05005	1.03306	1.03972	1.05634	1.05366	1.07157	1.03788	1.04923	1.05281	1.05017	1.04972	1.07328	1.06931	1.06023	1.08074	1.08037	1.07524	1.07272	1.04911	1.04563	1.03059	1.02059	0.990213	1.02771	1.03867	1.06444	1.04876	1.03641	1.02619	1.04257	1.06436	1.04615	1.04584	1.04653	1.06022	1.04408	1.03963	1.03802	1.03963	1.0314	1.05086	1.05645	0.991882
114	1.06107	1.04774	1.04627	1.04459	1.03711	1.04338	1.0463	1.03399	1.04033	1.05376	1.05986	1.07459	1.03768	1.05303	1.05568	1.05557	1.05119	1.07308	1.07349	1.0672	1.08367	1.0827	1.07651	1.07114	1.05479	1.04848	1.03192	1.02424	0.989052	1.03032	1.03592	1.0621	1.05007	1.03951	1.0261	1.04472	1.06558	1.05077	1.04702	1.04804	1.06969	1.04671	1.04481	1.04362	1.04006	1.03404	1.05161	1.0591	0.987772
124	1.06105	1.04953	1.04796	1.04747	1.03541	1.04586	1.04829	1.03691	1.03761	1.05772	1.06556	1.0766	1.04401	1.0564	1.05851	1.06104	1.05436	1.07657	1.07737	1.06937	1.08357	1.08961	1.08025	1.07582	1.05066	1.04897	1.03371	1.02507	0.992021	1.03567	1.03637	1.06399	1.05459	1.0394	1.03702	1.0483	1.06748	1.05183	1.0511	1.04809	1.06894	1.04721	1.04627	1.04565	1.03849	1.03967	1.05883	1.06438	0.985286
135	1.06219	1.04905	1.04653	1.04787	1.03648	1.04381	1.05371	1.03754	1.03856	1.05598	1.06852	1.07994	1.04328	1.05863	1.06047	1.06205	1.05522	1.0776	1.07938	1.07537	1.09037	1.08893	1.07876	1.07629	1.05249	1.04799	1.03676	1.02969	0.994331	1.0349	1.04289	1.06509	1.05915	1.04207	1.03933	1.05374	1.0722	1.055	1.05092	1.05265	1.06754	1.05411	1.04954	1.05023	1.04546	1.04208	1.06092	1.06609	0.9799
145	1.0622	1.04618	1.04433	1.04838	1.0359	1.04499	1.04586	1.04157	1.03748	1.05798	1.07374	1.07973	1.04285	1.05939	1.06282	1.06417	1.05288	1.07994	1.08406	1.07429	1.08912	1.09109	1.08248	1.07963	1.05461	1.04753	1.03803	1.03049	0.996786	1.0335	1.04065	1.06322	1.05874	1.04401	1.04193	1.05396	1.07148	1.05792	1.05351	1.05417	1.06925	1.05405	1.05358	1.05549	1.05308	1.04222	1.0666	1.07191	0.976417
155	1.0626	1.04661	1.04806	1.05183	1.04001	1.04561	1.04905	1.03554	1.0357	1.06157	1.07407	1.08246	1.04344	1.05719	1.06452	1.06307	1.05321	1.08015	1.08111	1.07277	1.0934	1.08696	1.08123	1.08315	1.05273	1.04954	1.04265	1.03214	0.998549	1.03678	1.04311	1.06392	1.06246	1.0468	1.04253	1.05935	1.07697	1.05472	1.04957	1.05641	1.07399	1.06006	1.05591	1.05268	1.0512	1.03967	1.07083	1.07539	0.973428
166	1.0625	1.04836	1.04617	1.05146	1.04531	1.0446	1.04689	1.03492	1.03248	1.06086	1.07534	1.08277	1.04287	1.05791	1.06502	1.06709	1.05386	1.08188	1.07772	1.07786	1.09681	1.08917	1.08671	1.08485	1.05242	1.05403	1.04094	1.03514	1.00097	1.03573	1.04374	1.06427	1.06328	1.05098	1.04514	1.05726	1.07509	1.05889	1.05221	1.05596	1.0733	1.06128	1.05855	1.05476	1.05542	1.04381	1.07681	1.07749	0.977492
176	1.06183	1.04889	1.04105	1.05473	1.04197	1.04727	1.04926	1.02986	1.02964	1.06208	1.07891	1.08476	1.04348	1.06016	1.06799	1.06824	1.05595	1.08086	1.0815	1.07847	1.09513	1.09207	1.08748	1.08276	1.05939	1.05398	1.04046	1.04396	0.997668	1.0414	1.04771	1.06227	1.06259	1.05211	1.0498	1.06101	1.07624	1.0585	1.05359	1.05876	1.07665	1.06343	1.06079	1.05764	1.05533	1.04361	1.07581	1.08079	0.974906
186	1.06417	1.05293	1.04083	1.05713	1.03885	1.04529	1.04968	1.02934	1.02916	1.06459	1.08286	1.08321	1.04738	1.0632	1.06758	1.06808	1.05659	1.08283	1.07718	1.07782	1.08872	1.09583	1.08549	1.08362	1.06089	1.05672	1.04161	1.04505	1.00032	1.04293	1.04589	1.05987	1.06742	1.05524	1.05192	1.06559	1.07644	1.06039	1.05337	1.05863	1.08169	1.06546	1.06128	1.06471	1.0551	1.04549	1.08309	1.08379	0.973954
197	1.06275	1.05017	1.04449	1.05118	1.03465	1.04565	1.04773	1.02859	1.02657	1.06448	1.08455	1.08679	1.04348	1.05893	1.06529	1.06851	1.05785	1.08324	1.07756	1.08047	1.09051	1.09275	1.0877	1.08545	1.05734	1.05977	1.04533	1.0443	0.998705	1.04523	1.04741	1.06173	1.06722	1.05906	1.05874	1.06316	1.07669	1.05995	1.05543	1.06407	1.08217	1.06446	1.06192	1.0655	1.05503	1.05023	1.08022	1.08501	0.972778
207	1.06061	1.05175	1.04011	1.05376	1.03926	1.04885	1.04564	1.02961	1.0226	1.06191	1.07976	1.08394	1.04618	1.05856	1.06747	1.06689	1.05882	1.08357	1.08024	1.07994	1.09137	1.09768	1.08828	1.08202	1.05956	1.06079	1.04703	1.04756	1.00061	1.04306	1.04634	1.06542	1.06868	1.06002	1.05918	1.06388	1.07854	1.06316	1.05727	1.06315	1.08232	1.06672	1.06345	1.06609	1.05476	1.05137	1.08341	1.08115	0.973002
217	1.06241	1.05147	1.03723	1.0539	1.03939	1.04754	1.04995	1.02944	1.023	1.06124	1.08641	1.08005	1.04668	1.06076	1.06858	1.07085	1.05767	1.07835	1.08313	1.08102	1.08972	1.09964	1.08994	1.08084	1.06596	1.06167	1.05005	1.04969	1.00191	1.0397	1.04701	1.06112	1.07072	1.06122	1.06312	1.06575	1.08178	1.06314	1.05544	1.06704	1.08455	1.06706	1.0658	1.07064	1.0576	1.05566	1.08628	1.08512	0.973405
228	1.06115	1.05117	1.03429	1.04785	1.03966	1.04762	1.04215	1.0227	1.01787	1.06052	1.08541	1.08073	1.04706	1.05856	1.0668	1.07078	1.05387	1.07901	1.07688	1.08331	1.09229	1.10187	1.09108	1.08265	1.06608	1.06316	1.04853	1.04381	1.00598	1.04266	1.04497	1.05709	1.07274	1.06486	1.06538	1.0635	1.07797	1.06086	1.05652	1.07111	1.08531	1.0696	1.06557	1.07198	1.0557	1.05454	1.08734	1.08471	0.9728
238	1.06167	1.04988	1.02979	1.05089	1.03669	1.04187	1.04462	1.0277	1.01705	1.06096	1.08217	1.08357	1.04283	1.05573	1.06831	1.06797	1.05494	1.07994	1.07808	1.07825	1.09109	1.10414	1.0874	1.08187	1.07264	1.062	1.04906	1.04853	1.00682	1.04295	1.04823	1.06023	1.07368	1.06189	1.06335	1.06694	1.08125	1.064	1.05713	1.07048	1.08976	1.07617	1.06788	1.07058	1.05817	1.05994	1.08607	1.08795	0.97326
248	1.05845	1.04745	1.03116	1.04549	1.03654	1.04442	1.04235	1.02981	1.01372	1.0591	1.07803	1.07999	1.04591	1.05484	1.0692	1.06809	1.05341	1.08028	1.0795	1.07989	1.09425	1.09565	1.08535	1.08301	1.07188	1.06218	1.05066	1.04739	1.00441	1.03985	1.04846	1.06159	1.07227	1.06645	1.06458	1.068	1.08352	1.06554	1.06166	1.07336	1.0898	1.07743	1.07374	1.07029	1.06007	1.05023	1.08885	1.09127	0.974726
259	1.05909	1.04721	1.03049	1.04712	1.03508	1.04339	1.04013	1.0243	1.01032	1.05786	1.08187	1.0846	1.04498	1.05249	1.06868	1.06631	1.05277	1.0796	1.07766	1.08022	1.09288	1.099	1.0819	1.08357	1.07055	1.06517	1.05639	1.05106	1.00507	1.04513	1.04499	1.06013	1.07641	1.0663	1.0669	1.07403	1.08495	1.06638	1.06503	1.07281	1.09007	1.0773	1.07392	1.07298	1.06275	1.05556	1.08956	1.09212	0.973114
269	1.05302	1.04797	1.02362	1.04505	1.03722	1.03828	1.04006	1.02529	1.00731	1.05993	1.08423	1.08022	1.04316	1.05424	1.06664	1.06549	1.05342	1.07905	1.0843	1.0787	1.09075	1.09529	1.08511	1.07933	1.07249	1.06733	1.05318	1.05338	1.00555	1.04433	1.04357	1.05791	1.07498	1.06785	1.06907	1.07593	1.08489	1.06776	1.06279	1.07133	1.09229	1.07722	1.07516	1.07738	1.06238	1.05477	1.09631	1.08754	0.970527
280	1.05567	1.04452	1.02252	1.04998	1.03384	1.03819	1.03851	1.02227	1.00432	1.05575	1.08024	1.07781	1.03884	1.05533	1.06906	1.0639	1.05381	1.07776	1.07638	1.0765	1.09006	1.09842	1.08778	1.07821	1.07097	1.06401	1.05092	1.0559	1.00858	1.04112	1.04243	1.06059	1.07552	1.0725	1.07068	1.07592	1.08936	1.07224	1.06801	1.07378	1.09412	1.08067	1.07689	1.07688	1.0618	1.059	1.09592	1.09265	0.971905
290	1.05438	1.04703	1.0191	1.05238	1.0328	1.03696	1.03573	1.02264	1.00331	1.0552	1.07936	1.07399	1.03985	1.05412	1.07001	1.06208	1.05261	1.07905	1.07613	1.0811	1.0922	1.09787	1.08149	1.07673	1.07145	1.06517	1.05157	1.05611	1.01055	1.03915	1.04156	1.06046	1.07875	1.07228	1.06967	1.07092	1.08938	1.06997	1.0672	1.07418	1.09579	1.08235	1.07843	1.07928	1.06817	1.06204	1.09909	1.09258	0.973204
300	1.04839	1.04549	1.01564	1.04572	1.02989	1.03614	1.03557	1.02367	0.999672	1.054	1.08264	1.07221	1.04046	1.05387	1.06643	1.06187	1.05386	1.07373	1.07465	1.0785	1.09018	1.09131	1.08338	1.07385	1.067	1.06748	1.05542	1.05427	1.0104	1.04247	1.03974	1.05917	1.07886	1.0719	1.07333	1.07119	1.0911	1.0694	1.06687	1.07479	1.09524	1.08284	1.07578	1.07969	1.06829	1.05463	1.09729	1.0947	0.975801
311	1.04911	1.0445	1.01183	1.05064	1.02885	1.03183	1.03164	1.02382	0.997673	1.05386	1.07792	1.0684	1.03688	1.05311	1.06595	1.06067	1.05257	1.07389	1.07615	1.07827	1.09207	1.094	1.08149	1.07544	1.06867	1.0694	1.05553	1.06043	1.01205	1.04228	1.0421	1.06543	1.08251	1.07164	1.07624	1.0767	1.09066	1.0758	1.07101	1.07334	1.09561	1.07907	1.0797	1.08232	1.06642	1.05651	1.09965	1.0984	0.969251
321	1.05049	1.04065	1.00825	1.04844	1.02727	1.02912	1.03374	1.02748	0.994097	1.0509	1.07737	1.06385	1.03803	1.05289	1.06226	1.05922	1.05004	1.07149	1.08264	1.07709	1.08827	1.09394	1.08108	1.07489	1.07106	1.06571	1.05366	1.05948	1.01059	1.03922	1.04144	1.07033	1.08092	1.0739	1.07379	1.07769	1.09281	1.07565	1.06917	1.07401	1.09782	1.08256	1.08242	1.08574	1.06604	1.05451	1.09662	1.09672	0.978534
331	1.04514	1.04312	1.00725	1.04558	1.0267	1.02988	1.02377	1.02219	0.99394	1.04867	1.07325	1.065	1.03802	1.05117	1.06303	1.05651	1.04983	1.0705	1.07404	1.0787	1.0916	1.09261	1.07897	1.07063	1.07775	1.06934	1.05627	1.06163	1.01483	1.03983	1.04259	1.06688	1.08395	1.07378	1.07304	1.07339	1.0911	1.07454	1.06902	1.07606	1.10032	1.08386	1.08677	1.08549	1.06735	1.05817	1.10049	1.09253	0.977504
342	1.04628	1.04064	1.00799	1.04221	1.02717	1.02462	1.03147	1.02348	0.990508	1.04433	1.07166	1.06347	1.03656	1.05077	1.05791	1.05357	1.04721	1.0695	1.07693	1.07141	1.08884	1.09345	1.07901	1.06818	1.07791	1.06879	1.05526	1.05821	1.01319	1.03753	1.0437	1.06728	1.08743	1.07409	1.07486	1.0746	1.09391	1.07745	1.06928	1.07437	1.10219	1.0833	1.08526	1.08502	1.06861	1.06199	1.09999	1.09688	0.974402
352	1.04241	1.04071	1.00204	1.0363	1.02607	1.01461	1.03092	1.01672	0.986011	1.04556	1.07227	1.06057	1.03335	1.04936	1.06069	1.05408	1.05053	1.069	1.07637	1.06804	1.08601	1.0933	1.07617	1.06923	1.07512	1.07324	1.05531	1.0553	1.01208	1.03228	1.05022	1.05992	1.09049	1.07817	1.0743	1.07571	1.09259	1.076	1.06928	1.07323	1.10229	1.0896	1.08875	1.08565	1.06659	1.06073	1.09866	1.09343	0.970124
362	1.04169	1.03421	0.995838	1.03608	1.02526	1.01456	1.02853	1.01331	0.985635	1.04186	1.06997	1.05816	1.03283	1.04682	1.05858	1.052	1.0479	1.06854	1.06818	1.07516	1.09114	1.094	1.07418	1.06484	1.07433	1.06699	1.05667	1.05801	1.01122	1.03166	1.04475	1.0585	1.08843	1.07612	1.07731	1.07595	1.09364	1.07478	1.06974	1.07502	1.10104	1.09	1.08787	1.0904	1.06862	1.06139	1.10106	1.09766	0.973271
373	1.05114	1.03429	0.993992	1.0353	1.0196	1.01312	1.02625	1.0099	0.982182	1.04007	1.06805	1.05498	1.03063	1.04586	1.05546	1.04963	1.04578	1.06511	1.07415	1.06903	1.08644	1.08591	1.07091	1.06551	1.08886	1.07393	1.05772	1.05621	1.01028	1.03696	1.04616	1.05799	1.09027	1.07656	1.07809	1.07628	1.09376	1.07508	1.07077	1.0758	1.10353	1.08506	1.08889	1.08561	1.06993	1.05785	1.10135	1.10261	0.97326
383	1.04704	1.03207	0.985908	1.03087	1.01879	1.01299	1.023	0.998072	0.979753	1.04042	1.06668	1.05545	1.0308	1.04282	1.05499	1.04871	1.04481	1.0694	1.07287	1.07036	1.08527	1.08456	1.07196	1.06321	1.08079	1.06687	1.05309	1.05601	1.00941	1.03429	1.04697	1.04963	1.09208	1.07644	1.076	1.08224	1.09347	1.07801	1.07337	1.07763	1.10413	1.09007	1.08944	1.08798	1.07092	1.05793	1.1019	1.10403	0.968389
393	1.04157	1.03239	0.984656	1.03033	1.01692	1.01953	1.02235	0.998909	0.974157	1.03824	1.06308	1.05084	1.02981	1.04474	1.05442	1.04617	1.0406	1.06566	1.072	1.06703	1.08532	1.08676	1.06841	1.06363	1.0836	1.06887	1.05678	1.05598	1.01085	1.04228	1.0469	1.04994	1.09381	1.0786	1.07776	1.08068	1.09515	1.07716	1.07607	1.07956	1.10448	1.087	1.0917	1.08976	1.0705	1.05771	1.10443	1.10567	0.975913
404	1.04098	1.02985	0.979826	1.02821	1.01718	1.01472	1.01975	1.00247	0.973836	1.03662	1.06135	1.04834	1.02757	1.04161	1.05095	1.04705	1.0416	1.06368	1.06347	1.0696	1.07771	1.08358	1.06878	1.06128	1.08256	1.06902	1.05417	1.05741	1.01157	1.03862	1.04239	1.0508	1.09355	1.0766	1.07579	1.08082	1.09268	1.07701	1.07137	1.07997	1.10295	1.09796	1.09363	1.09209	1.06636	1.05902	1.10422	1.10736	0.970281
414	1.03944	1.02682	0.973943	1.02826	1.01307	1.01279	1.01592	1.00108	0.968568	1.03458	1.05733	1.04493	1.02548	1.03884	1.05116	1.04414	1.0387	1.06	1.05946	1.06624	1.08125	1.08254	1.06745	1.05768	1.08613	1.06821	1.05458	1.05764	1.01041	1.04081	1.04396	1.05089	1.09162	1.07758	1.07792	1.07716	1.09387	1.07764	1.07524	1.08167	1.10654	1.09337	1.09052	1.09541	1.06777	1.06146	1.1074	1.09993	0.966698
424	1.04204	1.02374	0.976436	1.02308	1.01496	1.01156	1.01608	1.00086	0.966241	1.0304	1.05852	1.04447	1.02666	1.0379	1.05077	1.03834	1.03909	1.05518	1.06531	1.06784	1.0791	1.08968	1.06448	1.0586	1.08371	1.06988	1.05901	1.05849	1.01174	1.04269	1.04584	1.04896	1.09295	1.07842	1.07712	1.08115	1.09328	1.07857	1.07259	1.08169	1.10644	1.09202	1.09254	1.09214	1.06515	1.06478	1.1075	1.10498	0.965701
435	1.03557	1.02467	0.971095	1.01791	1.01173	1.01077	1.01536	0.993062	0.963989	1.03078	1.05436	1.04125	1.02443	1.03658	1.04876	1.04353	1.03765	1.0566	1.05938	1.06354	1.0812	1.07943	1.06115	1.05709	1.08997	1.0694	1.05575	1.05918	1.01425	1.04127	1.05021	1.04876	1.09351	1.07713	1.07859	1.07681	1.09328	1.07809	1.07583	1.08118	1.1074	1.09251	1.09066	1.09731	1.06875	1.06199	1.10358	1.10691	0.966866
445	1.03458	1.0234	0.966203	1.02357	1.00834	1.00599	1.01198	0.988432	0.960127	1.02699	1.05473	1.03702	1.02293	1.03507	1.04438	1.03898	1.03608	1.05476	1.06142	1.06146	1.07791	1.07876	1.0608	1.05458	1.08898	1.07265	1.05541	1.06048	1.01394	1.04059	1.04616	1.04629	1.09218	1.07812	1.07952	1.08103	1.09324	1.07887	1.07506	1.08491	1.10724	1.09614	1.09293	1.09745	1.07125	1.05943	1.10703	1.10825	0.967258
456	1.03005	1.02104	0.962709	1.02299	1.00717	1.00735	1.01123	0.990826	0.958298	1.02371	1.0522	1.03785	1.01977	1.03483	1.04326	1.03637	1.03053	1.05313	1.05958	1.06279	1.0736	1.0779	1.0597	1.05179	1.08223	1.06975	1.0577	1.06233	1.01383	1.04749	1.04956	1.04666	1.09048	1.07942	1.07897	1.07931	1.0952	1.08081	1.07555	1.0831	1.10478	1.09379	1.09577	1.09834	1.06918	1.05985	1.10609	1.11505	0.967
466	1.02506	1.01668	0.960341	1.01797	1.00661	1.0011	1.00452	0.992373	0.953664	1.0203	1.04968	1.03249	1.01696	1.03573	1.04335	1.03479	1.031	1.05351	1.06036	1.05793	1.07264	1.07515	1.05629	1.05096	1.08544	1.07718	1.05672	1.06203	1.01679	1.04285	1.0447	1.04909	1.0941	1.08015	1.07917	1.07945	1.09319	1.08215	1.07673	1.08466	1.10669	1.0949	1.09838	1.09669	1.06676	1.0643	1.10945	1.10607	0.957784
476	1.02639	1.01781	0.95572	1.01821	1.00275	0.997634	1.00754	0.989788	0.95275	1.02015	1.04634	1.02942	1.01745	1.03391	1.04314	1.03031	1.02971	1.04825	1.05639	1.05425	1.0731	1.07426	1.05739	1.04888	1.08195	1.07598	1.05909	1.06032	1.01288	1.04252	1.05286	1.04826	1.09492	1.08152	1.08069	1.08064	1.09421	1.08113	1.07944	1.07959	1.1086	1.0976	1.09731	1.09973	1.06665	1.06268	1.11001	1.10956	0.960438
487	1.0232	1.01745	0.951725	1.01514	1.00093	0.990891	1.00324	0.984619	0.948853	1.0175	1.0458	1.02483	1.01405	1.03386	1.03857	1.0315	1.02664	1.0461	1.04998	1.051	1.07182	1.0744	1.05219	1.04505	1.08281	1.07562	1.05906	1.06521	1.01522	1.03797	1.05016	1.04871	1.09571	1.08213	1.08119	1.07839	1.09457	1.0859	1.07457	1.08127	1.10772	1.09809	1.09985	1.09481	1.06758	1.06383	1.10774	1.11209	0.960628
497	1.02324	1.01475	0.95306	1.01432	0.99858	0.986278	1.00222	0.974916	0.945598	1.01503	1.04281	1.02217	1.01244	1.03134	1.03611	1.02808	1.02282	1.04704	1.04929	1.05159	1.07252	1.06554	1.05202	1.04352	1.08227	1.07163	1.05988	1.06416	1.01473	1.03377	1.04985	1.04411	1.09326	1.08375	1.08352	1.0796	1.09559	1.08397	1.0761	1.07937	1.10848	1.10095	1.09848	1.09652	1.06955	1.06003	1.1104	1.11402	0.959688
508	1.0208	1.01224	0.950181	1.00915	0.995707	0.983804	0.996643	0.976621	0.943176	1.01252	1.04011	1.02083	1.01203	1.03115	1.03458	1.02428	1.02735	1.04431	1.04456	1.05116	1.06744	1.06222	1.04765	1.04106	1.08079	1.07644	1.05988	1.06153	1.01423	1.03444	1.04567	1.03891	1.09268	1.0807	1.08048	1.08059	1.09626	1.08722	1.07313	1.07988	1.10913	1.10391	1.09913	1.09991	1.06912	1.05204	1.10994	1.11579	0.961032
518	1.01731	1.01273	0.943359	1.00804	0.996184	0.988447	0.99416	0.972628	0.939102	1.01102	1.03609	1.01598	1.01074	1.02713	1.0267	1.02301	1.02321	1.04377	1.04991	1.04679	1.06776	1.06024	1.04625	1.03859	1.07753	1.07405	1.06002	1.06108	1.01538	1.04048	1.0492	1.0395	1.09289	1.08139	1.08065	1.08055	1.09619	1.08392	1.0739	1.08375	1.10939	1.10186	1.10122	1.09907	1.06815	1.05416	1.11359	1.11741	0.956485
528	1.01401	1.00629	0.939301	1.00559	0.995906	0.989068	0.990569	0.969227	0.936481	1.00767	1.03507	1.01808	1.01068	1.02398	1.03081	1.0222	1.02178	1.04146	1.04061	1.04522	1.06254	1.05923	1.04504	1.03929	1.07875	1.07378	1.05522	1.06218	1.01642	1.04231	1.04426	1.03649	1.09152	1.08194	1.08363	1.08525	1.09754	1.08423	1.07492	1.08845	1.11094	1.10284	1.09843	1.10155	1.06835	1.05259	1.11488	1.11697	0.954279
539	1.0148	1.00245	0.936777	1.00506	0.99209	0.987609	0.989717	0.962999	0.935123	1.00483	1.03222	1.01359	1.00658	1.01786	1.02578	1.02103	1.0209	1.03604	1.04283	1.04502	1.06151	1.05755	1.04492	1.03272	1.07589	1.07113	1.06059	1.0612	1.01462	1.04018	1.04389	1.0329	1.09511	1.08073	1.08072	1.08405	1.09679	1.08212	1.07314	1.08707	1.11067	1.10062	1.10043	1.10067	1.06697	1.05277	1.11702	1.11435	0.958198
549	1.01165	1.00234	0.935588	1.00205	0.987686	0.985233	0.98587	0.959132	0.930851	1.00022	1.02789	1.00612	1.00592	1.01743	1.02401	1.01644	1.01776	1.03317	1.04315	1.04266	1.06136	1.05622	1.04282	1.03078	1.0794	1.0737	1.06074	1.06143	1.01069	1.04044	1.04138	1.03486	1.09539	1.08075	1.08639	1.08462	1.09841	1.0805	1.07597	1.08811	1.11061	1.09871	1.1028	1.10146	1.06841	1.05695	1.11556	1.1152	0.953563
560	1.00533	1.00012	0.928505	0.996805	0.986466	0.976302	0.981117	0.965975	0.928272	0.998836	1.03164	1.00835	1.00376	1.01251	1.02264	1.01648	1.0164	1.03198	1.04537	1.03594	1.06148	1.05559	1.03524	1.03069	1.0791	1.07385	1.05764	1.06207	1.01432	1.03845	1.03946	1.03981	1.09622	1.08225	1.08508	1.08235	1.09628	1.08114	1.0748	1.08905	1.10993	1.09932	1.10667	1.09994	1.07004	1.05649	1.11283	1.11586	0.959621
570	1.00915	0.999477	0.92814	0.994143	0.98246	0.971598	0.979656	0.9677	0.926668	0.99194	1.02761	1.00251	1.00118	1.01262	1.02062	1.01648	1.01386	1.03061	1.03593	1.03463	1.05998	1.04866	1.03293	1.03185	1.08464	1.07111	1.05925	1.06118	1.01727	1.03493	1.03907	1.04393	1.09455	1.08051	1.08539	1.08364	1.09512	1.08024	1.0771	1.08928	1.10922	1.10321	1.10421	1.10072	1.07187	1.05087	1.11232	1.12106	0.961379
580	1.00963	0.997301	0.924562	0.994063	0.981928	0.969429	0.9768	0.96876	0.922655	0.99194	1.02427	1.00013	0.998435	1.00931	1.01859	1.01249	1.0149	1.02802	1.03211	1.03471	1.05786	1.04604	1.03324	1.02458	1.08495	1.07374	1.0596	1.0611	1.01709	1.03637	1.03785	1.04606	1.09746	1.07822	1.08396	1.08359	1.09594	1.0817	1.07706	1.08768	1.11363	1.10552	1.10593	1.09855	1.06993	1.05008	1.11373	1.1193	0.95915
591	1.00765	0.995475	0.917459	0.993236	0.979587	0.966916	0.968925	0.962202	0.919837	0.989075	1.02345	0.998178	0.998325	1.00904	1.01796	1.01033	1.01304	1.02653	1.02935	1.02986	1.05596	1.04334	1.03258	1.02622	1.08354	1.07144	1.05935	1.06107	1.015	1.03192	1.0364	1.0402	1.09417	1.07769	1.08447	1.08149	1.09456	1.08418	1.0778	1.08983	1.11174	1.10516	1.10525	1.10271	1.06825	1.05233	1.11566	1.12329	0.955645
601	1.00255	0.992439	0.917448	0.986472	0.97607	0.957797	0.975649	0.956217	0.918022	0.985617	1.02037	1.00023	0.996183	1.00686	1.01635	1.00828	1.0095	1.02558	1.0331	1.0275	1.05038	1.04041	1.02875	1.02283	1.07881	1.07184	1.05915	1.06134	1.01594	1.0301	1.04375	1.03552	1.09522	1.07994	1.08543	1.08564	1.09574	1.08367	1.08043	1.09202	1.11433	1.10343	1.10644	1.1009	1.06547	1.0492	1.1154	1.12606	0.955724
611
622
632
642
[truncated: 48 more columns]

## Sheet: Fig. 8D
Data are values for cell volume (calcein fluorescence) from individual 96-wells, normalized to the first value in each dataset (= 1)
time [s]	WT pH 4.2 PS																								WT pH 4.2																								WT pH 7.4 PS
0	1	1	1	1	1	1	1	1	1	1	1	1	1	1	1	1	1	1	1	1	1	1	1	1	1	1	1	1	1	1	1	1	1	1	1	1	1	1	1	1	1	1	1	1	1	1	1	1	1
10	0.989531	1.00673	1.00381	1.00357	1.00161	1.01065	1.00727	1.00848	0.996405	1.00564	1.00608	1.00301	0.995535	1.00777	1.00755	1.00725	1.02569	1.01213	1.01184	1.00699	1.08031	1.01387	1.02023	1.01303	0.980931	1.00617	1.01019	1.00725	1.0087	1.01477	1.01467	1.00777	1.0128	1.01378	1.01414	1.01052	1.01246	1.01459	1.00857	1.00651	0.998737	1.01312	1.01939	1.01644	1.1442	1.01905	1.01938	1.01856	1.00816
21	0.987122	1.01212	1.00707	1.00599	1.00976	1.0174	1.01726	1.01449	1.00285	1.01182	1.00207	0.999804	1.00063	1.01105	1.00895	1.01475	1.02469	1.01902	1.02141	1.01643	1.08296	1.0124	1.03014	1.02202	0.992689	1.01756	1.01451	1.01063	1.01952	1.02514	1.0239	1.01656	1.02426	1.02449	1.02094	1.01885	1.02579	1.02844	1.01841	1.01511	1.00721	1.02735	1.03035	1.02933	1.1525	1.02192	1.03184	1.02925	1.00671
31	0.993707	1.01325	1.00602	1.01164	1.01073	1.02415	1.0246	1.01789	1.00555	1.0257	1.00396	1.0045	1.00608	1.01462	1.01437	1.01468	1.0264	1.02845	1.02146	1.02354	1.08741	1.0147	1.02594	1.02769	0.998472	1.02754	1.02434	1.02083	1.03033	1.03327	1.03024	1.02162	1.03228	1.03208	1.02411	1.03747	1.0359	1.033	1.02647	1.02482	1.01764	1.03645	1.03659	1.04173	1.1746	1.02647	1.03826	1.03678	1.0104
41	0.995357	1.0171	1.00673	1.00949	1.01315	1.03107	1.0232	1.02229	1.01065	1.02183	1.00458	1.00723	1.01219	1.01934	1.01545	1.0165	1.02729	1.03266	1.02098	1.02803	1.09122	1.01438	1.03089	1.03365	1.00401	1.03012	1.02676	1.02208	1.03561	1.04134	1.03917	1.03213	1.04057	1.03964	1.02733	1.03648	1.04322	1.03796	1.02944	1.02951	1.02198	1.04571	1.04353	1.05064	1.1844	1.03616	1.04483	1.04741	0.998532
52	0.998628	1.01956	1.00861	1.01173	1.01801	1.03284	1.02869	1.02707	1.01309	1.02324	1.00528	1.0036	1.01506	1.02466	1.02021	1.01571	1.031	1.03465	1.02078	1.0318	1.09356	1.01882	1.03883	1.03933	1.00704	1.03237	1.02753	1.02864	1.03951	1.04687	1.0456	1.03892	1.05162	1.04488	1.0349	1.04224	1.04454	1.04766	1.03747	1.03277	1.02866	1.05179	1.05328	1.06778	1.18478	1.04238	1.04881	1.05346	0.999752
62	1.00169	1.01725	1.00871	1.00994	1.02331	1.03321	1.03126	1.02851	1.01524	1.0267	1.01229	1.00239	1.0171	1.02813	1.02207	1.02488	1.03528	1.0357	1.02612	1.04013	1.10928	1.02238	1.04669	1.04404	1.01168	1.03823	1.03362	1.03423	1.04736	1.05003	1.04929	1.03791	1.05463	1.04856	1.04864	1.0485	1.05391	1.04993	1.03912	1.03993	1.03172	1.05848	1.05795	1.07283	1.20119	1.04778	1.05769	1.06011	0.992819
72	1.00467	1.01929	1.01553	1.00955	1.02376	1.03408	1.02923	1.02704	1.0169	1.03371	1.01903	1.01882	1.0194	1.03075	1.02885	1.0232	1.03621	1.04223	1.03416	1.0429	1.11602	1.02791	1.0478	1.04702	1.01317	1.04258	1.03753	1.03387	1.05111	1.05335	1.05163	1.0424	1.05855	1.06098	1.05953	1.06493	1.05681	1.05553	1.04674	1.04259	1.03245	1.06173	1.06436	1.07365	1.20037	1.05371	1.05925	1.06989	0.99038
83	1.00803	1.0189	1.01131	1.01114	1.02881	1.03577	1.03518	1.03141	1.01996	1.03497	1.02007	1.02266	1.02122	1.0332	1.02682	1.02414	1.03679	1.04402	1.03743	1.05121	1.11104	1.03051	1.05489	1.04971	1.01609	1.04423	1.03793	1.03327	1.05498	1.06014	1.05613	1.04692	1.06317	1.06808	1.06856	1.07037	1.05764	1.06057	1.04723	1.04556	1.04068	1.06791	1.06873	1.0791	1.21141	1.05618	1.065	1.0725	0.987106
93	1.00585	1.01946	1.01103	1.01105	1.02546	1.03959	1.03345	1.03146	1.02538	1.03419	1.01865	1.01655	1.02916	1.03729	1.03181	1.02916	1.04326	1.04626	1.04155	1.05394	1.11737	1.03106	1.05498	1.05169	1.01717	1.0408	1.03544	1.03848	1.057	1.06062	1.05432	1.05011	1.06661	1.06541	1.06314	1.06986	1.06495	1.06423	1.05141	1.04803	1.04524	1.07261	1.07509	1.08185	1.21107	1.05857	1.07051	1.077	0.992695
103	1.01066	1.01706	1.02168	1.0087	1.0276	1.04015	1.03928	1.03534	1.02942	1.03418	1.0172	1.01815	1.03062	1.03831	1.03274	1.03179	1.04418	1.04915	1.04506	1.05763	1.12063	1.03383	1.06135	1.06075	1.0189	1.03327	1.05067	1.03684	1.05806	1.06702	1.05602	1.05211	1.07048	1.06831	1.06091	1.06343	1.07156	1.06577	1.05307	1.05177	1.0445	1.07806	1.0791	1.08346	1.21429	1.05945	1.07712	1.07904	0.985842
114	1.00971	1.02416	1.02024	1.01109	1.03286	1.04091	1.03548	1.038	1.03186	1.03757	1.01828	1.01733	1.03335	1.04494	1.03745	1.03577	1.04366	1.05322	1.04899	1.0666	1.12269	1.03859	1.06578	1.06249	1.02097	1.04115	1.05353	1.03874	1.06252	1.06347	1.05809	1.05286	1.07499	1.07167	1.06726	1.06629	1.07278	1.07461	1.05587	1.05777	1.04896	1.08019	1.08831	1.09169	1.22651	1.06473	1.07998	1.0808	0.981585
124	1.01316	1.02294	1.02487	1.00987	1.0289	1.04185	1.03811	1.04101	1.03738	1.0407	1.02304	1.02424	1.032	1.04507	1.03935	1.03499	1.04415	1.05621	1.05348	1.07103	1.12894	1.04046	1.06711	1.06675	1.02273	1.0431	1.05311	1.03616	1.06209	1.06776	1.05982	1.05746	1.07816	1.07194	1.06771	1.06667	1.07496	1.07703	1.06218	1.06554	1.05397	1.08316	1.09142	1.09513	1.22314	1.06932	1.08328	1.08237	0.983617
135	1.01675	1.02451	1.02655	1.00844	1.03356	1.04372	1.03973	1.0438	1.03954	1.0415	1.02101	1.02405	1.03573	1.04749	1.04307	1.0382	1.04554	1.06024	1.05656	1.07472	1.12963	1.04513	1.0671	1.07017	1.02203	1.04627	1.04957	1.03672	1.06576	1.06692	1.06121	1.05472	1.08041	1.07127	1.06273	1.06881	1.0768	1.0749	1.06391	1.06394	1.05024	1.08529	1.09918	1.09453	1.22143	1.07352	1.08543	1.08925	0.983143
145	1.01644	1.02491	1.02087	1.01149	1.03955	1.04701	1.04188	1.04104	1.04107	1.0432	1.02342	1.02738	1.0385	1.04825	1.043	1.04024	1.04722	1.06335	1.06298	1.07899	1.13356	1.04703	1.06979	1.07396	1.02256	1.04528	1.04764	1.03439	1.06735	1.07054	1.06374	1.0537	1.08103	1.07628	1.06446	1.07467	1.07853	1.07312	1.06601	1.06862	1.05541	1.09083	1.10216	1.0977	1.22731	1.07232	1.08763	1.09009	0.990358
155	1.0186	1.02377	1.02411	1.01216	1.03868	1.04842	1.04291	1.03978	1.04269	1.04489	1.02703	1.03254	1.04152	1.05097	1.04652	1.03899	1.05202	1.06764	1.06602	1.07874	1.13125	1.04965	1.07824	1.0732	1.02256	1.04392	1.04984	1.03626	1.06811	1.0732	1.06344	1.05434	1.08103	1.07569	1.06628	1.07305	1.08922	1.07595	1.0679	1.07058	1.055	1.0938	1.10664	1.10406	1.21886	1.07511	1.08982	1.09332	0.988235
166	1.01555	1.02584	1.0234	1.00512	1.04312	1.05167	1.04704	1.04427	1.04794	1.05182	1.02514	1.03039	1.0424	1.05157	1.04594	1.04186	1.05255	1.06721	1.07198	1.08457	1.12984	1.05043	1.07871	1.07693	1.02445	1.04426	1.04173	1.03041	1.06931	1.07303	1.06162	1.0554	1.08268	1.07495	1.06343	1.07406	1.08381	1.08105	1.06957	1.07114	1.05641	1.09265	1.10804	1.10537	1.21931	1.07879	1.09431	1.09311	0.987953
176	1.019	1.02498	1.01943	1.00877	1.04539	1.05815	1.05027	1.04199	1.05212	1.05029	1.02954	1.03123	1.03953	1.05401	1.04952	1.05008	1.05511	1.07116	1.0738	1.0874	1.13113	1.05541	1.08224	1.07562	1.02531	1.03563	1.03949	1.026	1.06756	1.0745	1.06445	1.05546	1.08234	1.07748	1.06734	1.07825	1.07885	1.07974	1.06613	1.07033	1.05706	1.09641	1.11189	1.11021	1.21486	1.08022	1.10028	1.091	0.986463
186	1.02297	1.02359	1.02051	1.01368	1.04663	1.05159	1.04798	1.04457	1.05259	1.05545	1.03009	1.03467	1.0449	1.05813	1.04733	1.05123	1.05927	1.07578	1.07531	1.0887	1.13677	1.0598	1.08381	1.07427	1.02704	1.03415	1.03834	1.03081	1.06966	1.07611	1.06411	1.05409	1.08191	1.0777	1.06407	1.07606	1.08477	1.08068	1.06362	1.068	1.05918	1.09982	1.11515	1.12051	1.21884	1.08276	1.09621	1.09354	0.984024
197	1.02113	1.02177	1.02971	1.01174	1.04595	1.05506	1.05253	1.04569	1.0542	1.05767	1.03022	1.03433	1.04886	1.06179	1.05069	1.0474	1.0587	1.07514	1.07704	1.08987	1.13961	1.06141	1.08495	1.07609	1.02402	1.02659	1.05246	1.03048	1.07258	1.07619	1.0652	1.05019	1.08308	1.07793	1.06166	1.07714	1.08976	1.08085	1.06563	1.07403	1.05891	1.10274	1.1137	1.11545	1.22491	1.08436	1.09466	1.09304	0.984317
207	1.0245	1.02732	1.02939	1.01024	1.05116	1.05358	1.05188	1.04964	1.0595	1.05932	1.03308	1.03682	1.05144	1.0588	1.05179	1.05221	1.06241	1.08011	1.0837	1.09149	1.1423	1.06405	1.08646	1.07807	1.02397	1.037	1.05148	1.0248	1.07186	1.0753	1.065	1.05679	1.08609	1.07887	1.06256	1.07391	1.08844	1.07815	1.0703	1.07542	1.05829	1.10401	1.11679	1.11746	1.22727	1.08354	1.09527	1.09228	0.981054
217	1.03011	1.02597	1.02904	1.00933	1.05251	1.0563	1.05218	1.05109	1.05943	1.05751	1.03774	1.04316	1.05078	1.06334	1.05306	1.05055	1.06455	1.07964	1.08772	1.08901	1.14545	1.06633	1.08847	1.08306	1.02288	1.03556	1.04645	1.02333	1.07223	1.07481	1.06411	1.05167	1.08225	1.07776	1.05939	1.0796	1.08767	1.07786	1.06692	1.07194	1.06115	1.1004	1.1222	1.11404	1.23357	1.08591	1.09779	1.09582	0.979428
228	1.0247	1.02595	1.03002	1.00998	1.05547	1.05606	1.05417	1.04838	1.06504	1.06113	1.03689	1.04149	1.05505	1.06385	1.05429	1.04898	1.06705	1.08478	1.08884	1.09235	1.14899	1.06785	1.09056	1.08185	1.02435	1.03395	1.04486	1.02313	1.07156	1.07326	1.06351	1.05347	1.08091	1.08271	1.05996	1.08148	1.0869	1.08125	1.06734	1.07536	1.06064	1.1061	1.11877	1.11362	1.23953	1.08792	1.09546	1.09194	0.982116
238	1.02704	1.02828	1.02702	1.01222	1.05696	1.06271	1.05646	1.0536	1.06304	1.06411	1.03306	1.04485	1.05347	1.06673	1.05526	1.05404	1.06783	1.08802	1.08817	1.09114	1.15522	1.06958	1.08666	1.08354	1.02422	1.03084	1.04085	1.02166	1.07631	1.07276	1.06357	1.05218	1.08136	1.07873	1.06508	1.07778	1.08989	1.07861	1.06834	1.07545	1.05721	1.1064	1.12454	1.11572	1.23833	1.0885	1.09426	1.09391	0.981167
248	1.03044	1.02445	1.02718	1.01196	1.05644	1.06075	1.05778	1.05208	1.06796	1.06571	1.03754	1.04771	1.05782	1.07095	1.05862	1.05314	1.06742	1.09068	1.09084	1.093	1.15371	1.06661	1.09009	1.08858	1.0236	1.02824	1.0403	1.01882	1.07457	1.07465	1.06332	1.05295	1.08397	1.07201	1.0634	1.08125	1.09323	1.08029	1.06698	1.07805	1.0576	1.10795	1.11746	1.11789	1.24516	1.08391	1.09243	1.09472	0.979824
259	1.02876	1.02814	1.02839	1.0122	1.05863	1.06104	1.05763	1.05391	1.06854	1.06768	1.03832	1.047	1.05841	1.07008	1.05813	1.05831	1.0706	1.09322	1.09051	1.09989	1.15975	1.07185	1.09065	1.09049	1.02166	1.02557	1.03849	1.01531	1.07303	1.07392	1.05906	1.0528	1.07992	1.07672	1.06448	1.07857	1.09057	1.0809	1.06701	1.07505	1.05731	1.10644	1.1189	1.12183	1.24433	1.08365	1.09219	1.09522	0.980196
269	1.02879	1.02734	1.02575	1.01202	1.05867	1.05958	1.06105	1.05309	1.07128	1.07011	1.042	1.04796	1.05845	1.06915	1.06227	1.05912	1.0735	1.09048	1.09081	1.10175	1.15674	1.07376	1.09124	1.09388	1.02286	1.02306	1.03481	1.01676	1.07106	1.07125	1.0582	1.04889	1.08052	1.0762	1.05745	1.07866	1.08894	1.08018	1.06575	1.07468	1.05752	1.10611	1.11925	1.12115	1.24467	1.08604	1.09183	1.09401	0.977509
280	1.03147	1.02737	1.02751	1.01461	1.06344	1.06132	1.06116	1.05542	1.07132	1.06975	1.04245	1.04574	1.06198	1.07184	1.06356	1.05894	1.07507	1.09018	1.09563	1.1031	1.15992	1.07437	1.09391	1.09529	1.01796	1.02379	1.02984	1.01519	1.07204	1.06979	1.05898	1.05076	1.08082	1.07363	1.06029	1.07703	1.08615	1.07894	1.0648	1.07263	1.06049	1.10459	1.12017	1.12126	1.24326	1.08591	1.09473	1.09533	0.98224
290	1.03352	1.02624	1.02609	1.01183	1.06452	1.062	1.06141	1.05765	1.07365	1.07442	1.04222	1.045	1.06505	1.07266	1.06383	1.06154	1.07511	1.09288	1.09959	1.10746	1.16908	1.07168	1.09536	1.09313	1.01806	1.02236	1.02611	1.01172	1.07145	1.07166	1.05733	1.04844	1.07744	1.0745	1.05676	1.07299	1.08633	1.07723	1.06301	1.07875	1.05664	1.10453	1.12218	1.12172	1.24374	1.08402	1.0955	1.09329	0.978322
300	1.0353	1.02748	1.02218	1.01629	1.06323	1.06439	1.06268	1.0563	1.07466	1.07202	1.04387	1.05111	1.06322	1.07705	1.06432	1.06187	1.07713	1.09488	1.10262	1.10952	1.16744	1.07173	1.09825	1.09447	1.01795	1.019	1.02243	1.01054	1.06845	1.06916	1.05793	1.04804	1.07758	1.07016	1.05566	1.07341	1.08326	1.07634	1.06112	1.07124	1.05678	1.10656	1.12255	1.12017	1.2436	1.08233	1.09404	1.09316	0.979338
311	1.03552	1.02703	1.02128	1.01628	1.06057	1.06471	1.06405	1.0594	1.07448	1.07375	1.04525	1.0505	1.06004	1.07874	1.06799	1.06233	1.07851	1.09867	1.10816	1.10973	1.17007	1.07306	1.10115	1.09336	1.01644	1.01498	1.0219	1.01213	1.06771	1.06794	1.0573	1.04759	1.07481	1.07007	1.05294	1.07425	1.08132	1.0789	1.06519	1.07243	1.055	1.10722	1.12227	1.12295	1.24547	1.08069	1.09597	1.09232	0.976211
321	1.03933	1.02622	1.02407	1.01625	1.06686	1.06974	1.06791	1.0574	1.07589	1.07176	1.04654	1.05285	1.06689	1.08085	1.06807	1.06108	1.07968	1.09808	1.10262	1.11346	1.1799	1.07477	1.09846	1.09594	1.01559	1.01114	1.01646	1.00965	1.0687	1.06591	1.05009	1.04853	1.07353	1.06642	1.06045	1.07382	1.08344	1.07751	1.06699	1.07319	1.05369	1.1089	1.1203	1.12304	1.24802	1.08286	1.09602	1.0908	0.979835
331	1.0383	1.03085	1.02963	1.01559	1.06623	1.06879	1.06709	1.0577	1.07924	1.07539	1.04636	1.05299	1.06718	1.07997	1.0663	1.06465	1.08068	1.10196	1.10647	1.11607	1.17705	1.07923	1.09883	1.09763	1.01325	1.00785	1.02984	1.00645	1.06771	1.06486	1.05207	1.04213	1.07302	1.06347	1.05592	1.07031	1.08367	1.0819	1.06417	1.07359	1.05345	1.10571	1.12221	1.12481	1.24296	1.08176	1.09561	1.08837	0.976549
342	1.03942	1.02702	1.03025	1.01407	1.06681	1.06839	1.06656	1.06113	1.08032	1.07852	1.04687	1.0517	1.0716	1.08175	1.07235	1.0646	1.08229	1.10208	1.11054	1.11715	1.1777	1.07763	1.10112	1.0983	1.01331	1.00533	1.02636	1.00423	1.06784	1.06404	1.0525	1.03979	1.06934	1.06382	1.05601	1.0667	1.08542	1.07376	1.06084	1.07106	1.05533	1.10634	1.1233	1.12511	1.23009	1.08457	1.09403	1.08748	0.977193
352	1.03919	1.02787	1.02763	1.01733	1.07247	1.07045	1.06814	1.06301	1.08489	1.0779	1.04781	1.05246	1.07251	1.08076	1.07117	1.06411	1.08388	1.1042	1.11217	1.11462	1.167	1.07961	1.10235	1.10007	1.01267	1.00502	1.02178	1.00374	1.06389	1.06479	1.05127	1.03783	1.0685	1.06073	1.05061	1.06644	1.08704	1.06937	1.06293	1.07336	1.05407	1.10281	1.12293	1.12172	1.23403	1.07965	1.09545	1.0872	0.975928
362	1.04097	1.02748	1.03054	1.01684	1.06956	1.0703	1.06709	1.06416	1.08793	1.08085	1.04903	1.05408	1.07331	1.07929	1.07342	1.06658	1.08238	1.10337	1.11034	1.11482	1.17796	1.08095	1.10224	1.10153	1.00957	1.00461	1.02177	1.00216	1.0628	1.06067	1.04669	1.0378	1.06862	1.06251	1.04913	1.06364	1.08628	1.07065	1.06007	1.06874	1.05209	1.10328	1.12512	1.12143	1.23348	1.07958	1.09253	1.08632	0.975183
373	1.04106	1.03061	1.03126	1.01737	1.07046	1.07413	1.06865	1.06497	1.08888	1.08058	1.04877	1.0536	1.07453	1.08447	1.07439	1.06702	1.08657	1.10856	1.11332	1.11439	1.16999	1.0847	1.10339	1.1008	1.00928	1.00222	1.01756	1.00098	1.06286	1.06153	1.04699	1.03941	1.06818	1.06092	1.04915	1.05916	1.07953	1.07266	1.06083	1.06508	1.04965	1.10619	1.1222	1.11869	1.22954	1.07959	1.09095	1.08597	0.97638
383	1.04183	1.02621	1.03007	1.01828	1.06978	1.07105	1.07054	1.0665	1.08842	1.08353	1.0493	1.0551	1.07285	1.08305	1.07202	1.06813	1.08554	1.11098	1.11032	1.1193	1.17359	1.08519	1.1057	1.10119	1.00793	0.994877	1.01715	0.998986	1.06139	1.05735	1.04534	1.03368	1.06483	1.05583	1.04804	1.06132	1.08106	1.06922	1.05678	1.06284	1.04996	1.10679	1.12097	1.1192	1.23877	1.0803	1.0871	1.0824	0.976978
393	1.04204	1.0315	1.03052	1.01402	1.07245	1.0719	1.07197	1.06598	1.08882	1.085	1.05118	1.05876	1.07326	1.08692	1.07489	1.07369	1.08605	1.11117	1.11067	1.12104	1.17543	1.08023	1.10379	1.10298	1.00863	0.998163	1.01169	0.995888	1.06094	1.05763	1.0412	1.03594	1.06844	1.05715	1.04562	1.05878	1.0815	1.07018	1.05514	1.06232	1.04737	1.10236	1.11691	1.11871	1.23618	1.07839	1.08633	1.08551	0.974969
404	1.04323	1.03463	1.03046	1.01534	1.07662	1.07375	1.07025	1.06887	1.09154	1.08198	1.05197	1.05845	1.07603	1.08652	1.07598	1.07093	1.08747	1.10574	1.11299	1.1215	1.1816	1.08414	1.10708	1.10654	1.0063	0.997326	1.01146	0.991988	1.06167	1.054	1.04075	1.03213	1.06431	1.05228	1.04473	1.05836	1.08173	1.06453	1.05345	1.06468	1.04787	1.10234	1.1176	1.11639	1.23694	1.07485	1.08625	1.08569	0.975669
414	1.04412	1.03353	1.03201	1.01472	1.07574	1.07432	1.07087	1.06983	1.09123	1.08224	1.05323	1.05887	1.0748	1.08814	1.0778	1.07199	1.08843	1.1059	1.11523	1.12433	1.17644	1.08192	1.10726	1.10669	1.00378	0.995353	1.0084	0.989994	1.05808	1.05431	1.03874	1.02908	1.06233	1.05457	1.03994	1.05267	1.07852	1.06317	1.05173	1.0613	1.04609	1.10155	1.11807	1.11648	1.21922	1.07686	1.08579	1.08343	0.983764
424	1.04325	1.02912	1.03	1.01263	1.07385	1.07649	1.07342	1.06997	1.09128	1.08463	1.05	1.05855	1.077	1.08459	1.07658	1.07251	1.0877	1.10668	1.11841	1.13051	1.17549	1.08545	1.10986	1.10525	1.00324	0.991775	1.00504	0.982016	1.05613	1.05129	1.03849	1.0305	1.05896	1.04899	1.03519	1.05262	1.07574	1.05925	1.05105	1.06037	1.04507	1.09613	1.11775	1.11659	1.22419	1.07682	1.08783	1.07898	0.978299
435	1.04617	1.03464	1.0302	1.01452	1.07628	1.07557	1.07369	1.06796	1.09057	1.08541	1.05234	1.06443	1.08457	1.08884	1.07948	1.0731	1.09005	1.10636	1.12024	1.12838	1.17452	1.08684	1.10789	1.10412	1.00215	0.986059	1.00054	0.985671	1.05789	1.05084	1.03746	1.03045	1.05721	1.0489	1.03369	1.05428	1.07261	1.06015	1.0501	1.05861	1.04331	1.0976	1.11626	1.11858	1.22586	1.0774	1.08378	1.07613	0.978932
445	1.04607	1.03146	1.03244	1.01508	1.07773	1.0774	1.07601	1.07261	1.09178	1.08663	1.0495	1.06169	1.07785	1.0888	1.07843	1.07728	1.08942	1.10756	1.11973	1.12889	1.17754	1.0871	1.10986	1.10839	1.0004	0.986846	1.0001	0.977837	1.05352	1.04774	1.03371	1.02781	1.05386	1.04503	1.03629	1.04988	1.07143	1.06138	1.0459	1.05722	1.04256	1.09738	1.11711	1.11797	1.22655	1.07562	1.07812	1.08068	0.980704
456	1.05011	1.03539	1.03168	1.01375	1.07626	1.07598	1.0778	1.07164	1.09632	1.08947	1.05274	1.06372	1.08198	1.08871	1.07939	1.08094	1.08721	1.11262	1.12366	1.12382	1.18462	1.08734	1.10563	1.10837	0.996062	0.985651	0.994065	0.977759	1.05331	1.04443	1.02853	1.02574	1.05304	1.04192	1.03394	1.05188	1.07252	1.05608	1.0437	1.05301	1.04123	1.09709	1.11699	1.11616	1.23081	1.07051	1.0799	1.07648	0.974257
466	1.04904	1.03739	1.03159	1.01595	1.08271	1.07912	1.07514	1.07184	1.09788	1.0891	1.05462	1.06578	1.08406	1.08974	1.08205	1.07699	1.08898	1.11631	1.11892	1.12627	1.18102	1.08983	1.10776	1.10971	0.994874	0.982763	0.991613	0.975341	1.0517	1.04423	1.03091	1.02448	1.05272	1.04529	1.03067	1.05139	1.06716	1.05867	1.04607	1.04969	1.03745	1.09684	1.11282	1.11293	1.22908	1.07048	1.07633	1.07546	0.977904
476	1.04891	1.03562	1.03228	1.01546	1.07797	1.08059	1.07794	1.07305	1.09451	1.08785	1.05465	1.06208	1.08678	1.09303	1.08327	1.07808	1.09569	1.11438	1.11632	1.13155	1.1811	1.08519	1.10849	1.1119	0.994726	0.97902	0.990207	0.97484	1.04919	1.04058	1.02767	1.02118	1.04985	1.04308	1.03504	1.04211	1.06596	1.05753	1.04333	1.04808	1.03915	1.09614	1.10851	1.11341	1.22925	1.0687	1.07682	1.07371	0.976267
487	1.0497	1.03392	1.03288	1.01702	1.07854	1.0806	1.07604	1.07562	1.09642	1.08776	1.05596	1.06495	1.08775	1.09344	1.07882	1.07466	1.09198	1.11309	1.12039	1.13092	1.18565	1.0853	1.11021	1.11213	0.992395	0.97694	0.985582	0.974194	1.04715	1.04049	1.0257	1.02045	1.05001	1.03629	1.03026	1.04445	1.06721	1.05395	1.04063	1.04516	1.03747	1.09584	1.10923	1.11187	1.2266	1.065	1.07708	1.07112	0.978322
497	1.05036	1.03283	1.02969	1.01659	1.08083	1.08259	1.076	1.07577	1.0989	1.0898	1.05836	1.06417	1.08527	1.09115	1.08097	1.07816	1.09454	1.11466	1.11927	1.12904	1.18245	1.08642	1.11156	1.1131	0.99132	0.973061	0.982379	0.970193	1.04719	1.03917	1.02127	1.01445	1.04726	1.02889	1.02564	1.04099	1.0651	1.0534	1.039	1.04578	1.03565	1.09129	1.10862	1.10849	1.21838	1.06379	1.07413	1.07191	0.973456
508	1.05248	1.03239	1.03051	1.01346	1.07935	1.07993	1.07799	1.07453	1.09998	1.0903	1.05443	1.06453	1.08646	1.0937	1.08239	1.0787	1.09229	1.1075	1.12005	1.13258	1.17982	1.09049	1.11292	1.11226	0.989294	0.969065	0.98347	0.967486	1.04143	1.03741	1.02305	1.01315	1.0449	1.02968	1.02166	1.0368	1.06551	1.05191	1.036	1.04459	1.03452	1.08876	1.1033	1.1096	1.2101	1.06217	1.07236	1.06884	0.972519
518	1.05195	1.03202	1.02719	1.0212	1.08102	1.07657	1.07735	1.07533	1.10359	1.08954	1.05447	1.06498	1.08511	1.09543	1.08239	1.07718	1.09487	1.11316	1.12064	1.13488	1.17697	1.08964	1.11191	1.10966	0.987529	0.964943	0.97757	0.970873	1.03985	1.03142	1.0206	1.01214	1.04499	1.0266	1.01934	1.0339	1.06433	1.04808	1.03185	1.04185	1.0351	1.08782	1.10206	1.10793	1.20311	1.06304	1.06914	1.06478	0.96868
528	1.05141	1.0285	1.02999	1.02374	1.08298	1.08017	1.08167	1.07506	1.10209	1.09338	1.05462	1.06467	1.08541	1.09374	1.08044	1.07948	1.09452	1.11183	1.12243	1.1361	1.17385	1.0892	1.11623	1.11166	0.987382	0.961045	0.975606	0.969614	1.03871	1.03175	1.01711	1.01074	1.03974	1.02563	1.01673	1.03125	1.06191	1.04789	1.03008	1.03981	1.0312	1.08687	1.10109	1.10937	1.20256	1.06242	1.06924	1.06737	0.974133
539	1.04961	1.0294	1.02947	1.02151	1.08076	1.07748	1.0797	1.07722	1.0987	1.09036	1.05477	1.06256	1.08537	1.09744	1.08417	1.08109	1.09326	1.11326	1.12412	1.13315	1.17414	1.09029	1.11489	1.11368	0.98427	0.956854	0.973066	0.965792	1.03579	1.02753	1.01534	1.00985	1.03832	1.02607	1.01267	1.03112	1.0605	1.04378	1.02624	1.0392	1.03008	1.08321	1.10397	1.10933	1.2011	1.06159	1.06642	1.06218	0.970938
549	1.05348	1.0277	1.03113	1.02156	1.08309	1.08405	1.08001	1.07709	1.10281	1.09185	1.055	1.06289	1.08501	1.09543	1.08459	1.07911	1.09641	1.11278	1.126	1.13745	1.17899	1.09188	1.11431	1.11488	0.982652	0.953481	0.974052	0.961346	1.03338	1.03148	1.0124	1.0065	1.03521	1.01711	1.00932	1.0286	1.06115	1.04396	1.02524	1.03629	1.02743	1.08282	1.1021	1.10281	1.19978	1.061	1.06125	1.05774	0.969278
560	1.05418	1.03154	1.02893	1.02097	1.08113	1.08608	1.08115	1.07528	1.10142	1.09564	1.05806	1.06488	1.0878	1.09478	1.08311	1.07893	1.09334	1.11361	1.13006	1.13296	1.17907	1.09396	1.11335	1.11414	0.980841	0.949476	0.96728	0.958449	1.03359	1.02827	1.00864	1.00429	1.03267	1.01609	1.00856	1.02395	1.05869	1.03928	1.02653	1.03608	1.02814	1.07961	1.10122	1.10278	1.20028	1.05857	1.06145	1.05625	0.970362
570	1.0542	1.02665	1.03226	1.02283	1.08246	1.08552	1.08021	1.07785	1.10576	1.09486	1.05831	1.06337	1.08552	1.09501	1.08355	1.07811	1.09545	1.11576	1.12917	1.13616	1.18179	1.09164	1.11543	1.11226	0.979404	0.945908	0.967393	0.957613	1.03048	1.02495	1.00967	1.00021	1.03339	1.01595	1.00396	1.02173	1.05757	1.03716	1.01872	1.03021	1.02514	1.0781	1.09807	1.10169	1.20125	1.05689	1.05768	1.05448	0.969786
580	1.05286	1.03118	1.03314	1.02028	1.08385	1.08325	1.07785	1.07675	1.1053	1.09116	1.05324	1.06422	1.08944	1.09175	1.08382	1.07897	1.09767	1.11591	1.13181	1.13662	1.17835	1.09281	1.11527	1.1155	0.976869	0.94583	0.964635	0.951908	1.02804	1.02217	1.00732	0.997022	1.02877	1.00893	1.00158	1.02199	1.05519	1.03241	1.02087	1.02807	1.02115	1.07716	1.09768	1.10172	1.19893	1.05573	1.06096	1.05616	0.971412
591	1.05361	1.02902	1.0316	1.01831	1.08574	1.08377	1.08061	1.07943	1.10636	1.09462	1.05739	1.06638	1.08836	1.09275	1.08307	1.08118	1.095	1.11784	1.13157	1.13794	1.18308	1.09229	1.11737	1.11504	0.973836	0.941708	0.961214	0.946337	1.02613	1.02	1.0042	0.996287	1.02748	1.01037	0.99922	1.01324	1.05265	1.03295	1.02166	1.02951	1.02194	1.07393	1.09396	1.10166	1.20254	1.05131	1.05614	1.0512	0.972406
601	1.05372	1.03007	1.0336	1.01445	1.08359	1.08701	1.08072	1.07802	1.10767	1.09812	1.05745	1.06565	1.08541	1.09526	1.0833	1.08209	1.09714	1.11185	1.1292	1.14035	1.17685	1.08937	1.11733	1.11364	0.975771	0.938276	0.971364	0.94383	1.02489	1.01681	1.00181	0.994808	1.02473	1.00731	0.995883	1.01487	1.04885	1.0309	1.02225	1.02333	1.01914	1.07222	1.09129	1.09684	1.19666	1.05008	1.05203	1.05013	0.96991
611
622
632
642
[truncated: 45 more columns]
