# Supplementary material for: Identification of TMEM206 proteins as pore of PAORAC/ASOR acid-sensitive chloride channels
Source: eLife journal article supplement (doi:10.7554/elife.49187), 2019-07-18
Supplement: supp [file elife-49187-supp-v1.zip]

**A**

Extracellular

TM1

TM2

Cytoplasmic

Legend:

- MTSES effect (Cys mutant)
- Selectivity change
- Current at pH 7.4 (Cys mutant)
- No current (Cys mutant)
- N-glycosylation
- Hydrophobic residue

**B**

Human

Naked mole-rat

Green anole

Chicken

Zebrafish

TM1

TM2

|                                                                                   |     |                                  |     |
|-----------------------------------------------------------------------------------|-----|----------------------------------|-----|
| Human                                                                             | 60  | ACLKNVFSVLLIFTIYLLLMVAVFVYETIDF  | 92  |
| Naked mole-rat                                                                    | 60  | ACLKNVFSVLLIFTIYLLLMVAVFVYQTIDF  | 92  |
| Green anole                                                                       | 48  | SLCKNVFSVLLIFTIYLLMVAIFLVYQTIADF | 80  |
| Chicken                                                                           | 60  | TCLKNVFSVILLFIYLLLMVAVFVYQTSISDF | 92  |
| Zebrafish                                                                         | 61  | ACLNKVFVTIVLVIYLTAVAVFLAYQTISDF  | 93  |
| :*****:*:*:** * ***:**:*:***                                                      |     |                                  |     |
| <div style="text-align: center; border: 1px solid black; padding: 2px;">TM2</div> |     |                                  |     |
| Human                                                                             | 297 | DIVTANFNITVLGAELEKAEEF           | 323 |
| Naked mole-rat                                                                    | 297 | DIITANPNWNTIALLCGAFLALFKASEF     | 323 |
| Green anole                                                                       | 285 | DIITANPNWNIALLCGVFLALFKAAEF      | 311 |
| Chicken                                                                           | 297 | DIITANPNWNTIALLCGIFLALFKAAEF     | 323 |
| Zebrafish                                                                         | 298 | DIVTANPNWNTIALLCGVFMALFKAAEF     | 324 |
| **.*.....*.***.***.***..-.                                                        |     |                                  |     |
